# Supplementary material for: Connectivity mapping of angiotensin-PPAR interactions involved in the amelioration of non-alcoholic steatohepatitis by Telmisartan
Source: Sci Rep. 2019 Mar 8;9:4003. doi: 10.1038/s41598-019-40322-1 (PMC6408578; doi:10.1038/s41598-019-40322-1)
Supplement: Supplementary file 1 — Supplementary Information [file 41598_2019_40322_MOESM1_ESM.pdf]

# **Connectivity mapping of angiotensin-PPAR interactions involved in the amelioration of non-alcoholic steatohepatitis by Telmisartan**

Jung Gyu Park<sup>1</sup>, Jong Soo Mok<sup>2</sup>, Young In Han<sup>3</sup>, Tae Sub Park<sup>2,3</sup>, Keon Wook Kang<sup>4</sup>, Cheol Soo Choi<sup>5,6</sup>, Hee Dong Park<sup>1</sup>, Joonghoon Park<sup>2,3\*</sup>

<sup>1</sup>LG Chem R&D Campus, Korea

<sup>2</sup>Graduate School of International Agricultural Technology, Seoul National University, Korea

<sup>3</sup>Institute of Green Bio Science and Technology, Seoul National University, Korea

<sup>4</sup>College of pharmacy, Seoul National University, Korea

<sup>5</sup>Korea mouse metabolic phenotyping center, Lee Gil Ya cancer and diabetes institute, Gachon University School of Medicine, Republic of Korea.

<sup>6</sup>Endocrinology, Internal Medicine, Gachon University Gil Medical Center, Republic of Korea.

\*Correspondence: **joonghoon@snu.ac.kr**

## **Supplementary Information**

### **Supplementary Tables**

Supplementary Table 1. NAFLD activity score

Supplementary Table 2. Normalized probeset

Supplementary Table 3. Differentially expressed genes by telmisartan in STAM mice liver

Supplementary Table 4. Gene set enrichment analysis of telmisartan-induced DEGs

Supplementary Table 5. Chemical perturbagens connected with telmisartan-induced DEGs

Supplementary Table 6. Strongly paired genetic perturbagens connected with telmisartan-treated DEGs

Supplementary Table 7. ChIP-X enrichment analysis of transcription factors to telmisartan-induced DEGs

Supplementary Table 8. Primer information for qRT-PCR

## **Supplementary Information**

### **Supplementary Figure**

Supplementary Figure 1. Uncropped Western blots with original markings

Full scanned 9% SDS-PAGE gels for Western blots of PPAR $\delta$  (a), PPAR $\alpha$  (b), RELA (c) and ACTB (d). Some gel images were cropped to merge with size marker while removing samples unrelated to study which were ran on the same gel. Black dashed boxes indicate cropped region shown in respective figure. Ctrl: vehicle control, Tel: telmisartan at 10  $\mu$ M, Pal: palmitate at 0.2 mM.

Supplementary Table 1. NAFLD activity score

| Group       | No. of animals | Score     |   |   |   |                      |   |   |   |                       | NAS<br>(mean ± SD) |   |     |   |      |
|-------------|----------------|-----------|---|---|---|----------------------|---|---|---|-----------------------|--------------------|---|-----|---|------|
|             |                | Steatosis |   |   |   | Lobular inflammation |   |   |   | Hepatocyte ballooning |                    |   |     |   |      |
|             |                | 0         | 1 | 2 | 3 | 0                    | 1 | 2 | 3 | 0                     | 1                  | 2 |     |   |      |
| Control     | 7              | -         | 7 | - | - | -                    | - | 5 | 2 | -                     | 4                  | 3 | 4.7 | ± | 0.76 |
| Telmisartan | 7              | 1         | 6 | - | - | 1                    | 4 | 2 | - | 1                     | 5                  | 1 | 3.0 | ± | 0.82 |

| Definition of NAS Components |       |                                 |
|------------------------------|-------|---------------------------------|
| Item                         | Score | Extent                          |
| Steatosis                    | 0     | <5%                             |
|                              | 1     | 5-33%                           |
|                              | 2     | >33-66%                         |
|                              | 3     | >66%                            |
| Lobular Inflammation         | 0     | No foci                         |
|                              | 1     | <2 foci/200x                    |
|                              | 2     | 2-4 foci/200x                   |
|                              | 3     | >4 foci/200x                    |
| HepatocyteBallooning         | 0     | None                            |
|                              | 1     | Few balloon cells               |
|                              | 2     | Many cells/prominent ballooning |

Supplementary Table 2. Normalized probeset

| Probeset ID | Gene Symbol  | Gene Description                                                                         | Ctrl_01  | Ctrl_02  | Ctrl_03  | Tel_01   | Tel_02   | Tel_03   |
|-------------|--------------|------------------------------------------------------------------------------------------|----------|----------|----------|----------|----------|----------|
| 17478785    | Gm7367       | 1110014K08Rik pseudogene                                                                 | 13.53366 | 11.85275 | 13.14471 | 11.50086 | 10.46921 | 12.48125 |
| 17336636    | Agpat1       | 1-acylglycerol-3-phosphate O-acyltransferase 1 (lysophosphatidic acid acyltransferase 1) | 15.55277 | 18.62954 | 21.10832 | 18.62954 | 17.28885 | 18.62954 |
| 17383104    | Agpat2       | 1-acylglycerol-3-phosphate O-acyltransferase 2 (lysophosphatidic acid acyltransferase 2) | 267.0433 | 204.0756 | 179.556  | 231.0258 | 201.7955 | 199.639  |
| 17242474    | Agpat3       | 1-acylglycerol-3-phosphate O-acyltransferase 3                                           | 268.6399 | 267.4805 | 261.7707 | 244.761  | 246.3917 | 245.8271 |
| 17333222    | Agpat4       | 1-acylglycerol-3-phosphate O-acyltransferase 4 (lysophosphatidic acid acyltransferase 4) | 3.804245 | 4.270663 | 5.179777 | 5.455419 | 5.324441 | 4.004217 |
| 17499560    | Agpat5       | 1-acylglycerol-3-phosphate O-acyltransferase 5 (lysophosphatidic acid acyltransferase 5) | 20.78787 | 19.42873 | 19.00767 | 19.42873 | 16.31956 | 17.90251 |
| 17439622    | Agpat9       | 1-acylglycerol-3-phosphate O-acyltransferase 9                                           | 50.31233 | 50.31233 | 53.92155 | 50.31233 | 39.12747 | 34.98077 |
| 17388499    | Accs         | 1-aminocyclopropane-1-carboxylate synthase (non-functional)                              | 6.766313 | 6.981127 | 7.698994 | 8.457844 | 8.410141 | 8.395347 |
| 17388522    | Accl         | 1-aminocyclopropane-1-carboxylate synthase (non-functional)-like                         | 4.08303  | 3.972535 | 2.809708 | 2.600141 | 3.166129 | 3.106801 |
| 17457171    | Bpgm         | 2,3-bisphosphoglycerate mutase                                                           | 35.68485 | 29.32156 | 29.32156 | 29.32156 | 19.91895 | 24.48914 |
| 17256404    | Cnp          | 2,3-cyclic nucleotide 3 phosphodiesterase                                                | 11.24366 | 9.52527  | 9.40384  | 9.730406 | 9.213696 | 10.02368 |
| 17423463    | Decr1        | 2,4-dienoyl CoA reductase 1, mitochondrial                                               | 152.694  | 151.8655 | 144.0874 | 134.2176 | 124.4455 | 126.441  |
| 17416325    | Dhcr24       | 24-dehydrocholesterol reductase                                                          | 892.4639 | 1115.945 | 1128.679 | 991.0541 | 941.0255 | 816.7892 |
| 17342581    | Decr2        | 2,4-dienoyl-Coenzyme A reductase 2, peroxisomal                                          | 847.4298 | 906.4917 | 846.1268 | 851.9116 | 783.4243 | 808.8621 |
| 17452126    | Oas1a        | 2-5 oligoadenylate synthetase 1A                                                         | 7.85483  | 4.872189 | 6.552929 | 9.960513 | 5.48933  | 5.911278 |
| 17441759    | Oas1b        | 2-5 oligoadenylate synthetase 1B                                                         | 5.963916 | 5.364598 | 7.814535 | 9.085967 | 7.814535 | 8.433667 |
| 17452097    | Oas1c        | 2-5 oligoadenylate synthetase 1C                                                         | 4.52137  | 4.146287 | 4.542291 | 4.64066  | 2.782767 | 4.619735 |
| 17441788    | Oas1d        | 2-5 oligoadenylate synthetase 1D                                                         | 3.062691 | 3.263862 | 2.659804 | 2.659804 | 3.295255 | 3.010681 |
| 17452089    | Oas1e        | 2-5 oligoadenylate synthetase 1E                                                         | 3.990197 | 4.245075 | 4.072063 | 3.147726 | 4.269952 | 3.270407 |
| 17441768    | Oas1f        | 2-5 oligoadenylate synthetase 1F                                                         | 2.802841 | 3.401733 | 4.302872 | 4.767986 | 3.513844 | 3.592355 |
| 17452115    | Oas1g        | 2-5 oligoadenylate synthetase 1G                                                         | 7.53376  | 15.196   | 8.185894 | 8.581798 | 12.8405  | 10.17121 |
| 17441777    | Oas1h        | 2-5 oligoadenylate synthetase 1H                                                         | 2.177541 | 2.351221 | 2.391209 | 1.907866 | 2.403705 | 2.307339 |
| 17452054    | Oas2         | 2-5 oligoadenylate synthetase 2                                                          | 17.22629 | 27.11219 | 40.00227 | 32.34722 | 26.42644 | 28.98832 |
| 17452070    | Oas3         | 2-5 oligoadenylate synthetase 3                                                          | 15.70716 | 19.71798 | 18.62954 | 21.92812 | 17.58435 | 18.64452 |
| 17441051    | Oas1         | 2-5 oligoadenylate synthetase-like 1                                                     | 26.64975 | 23.59043 | 31.50655 | 34.57051 | 26.96115 | 33.8762  |
| 17441037    | Oas2         | 2-5 oligoadenylate synthetase-like 2                                                     | 11.78271 | 14.64331 | 22.72377 | 16.23595 | 14.64331 | 14.55164 |
| 17548963    | Gm17764      | 28S ribosomal protein S14, mitochondrial-like                                            | 12.92973 | 14.38876 | 14.1656  | 14.6214  | 12.38309 | 12.7511  |
| 17241643    | Ado          | 2-aminoethanethiol (cysteamine) dioxygenase                                              | 34.9127  | 27.7957  | 22.77675 | 26.703   | 30.97731 | 28.09186 |
| 17296548    | Tcstv1       | 2-cell-stage, variable group, member 1                                                   | 2.265674 | 2.307739 | 1.726009 | 1.715346 | 2.266145 | 1.941901 |
| 17290211    | Tcstv3       | 2-cell-stage, variable group, member 3                                                   | 5.015835 | 3.214691 | 2.411683 | 3.07906  | 4.562486 | 3.673767 |
| 17338118    | Dnph1        | 2-deoxynucleoside 5-phosphate N-hydrolase 1                                              | 25.55671 | 27.14341 | 26.94377 | 28.99295 | 27.18088 | 29.96113 |
| 17463898    | Dera         | 2-deoxyribose-5-phosphate aldolase homolog (C. elegans)                                  | 106.9416 | 97.89478 | 84.54749 | 107.511  | 80.90125 | 100.2856 |
| 17304794    | Hac1         | 2-hydroxyacyl-CoA lyase 1                                                                | 542.177  | 591.3711 | 657.2325 | 659.1258 | 581.1553 | 384.6333 |
| 17503910    | Ogfod1       | 2-oxoglutarate and iron-dependent oxygenase domain containing 1                          | 42.32593 | 40.7817  | 41.04942 | 41.09383 | 43.45981 | 39.93301 |
| 17442464    | Ogfod2       | 2-oxoglutarate and iron-dependent oxygenase domain containing 2                          | 24.9191  | 20.58812 | 21.84846 | 20.99567 | 17.33745 | 21.1615  |
| 17273485    | Ogfod3       | 2-oxoglutarate and iron-dependent oxygenase domain containing 3                          | 29.29312 | 28.93493 | 27.09867 | 24.10934 | 27.89124 | 27.41721 |
| 17529871    | Pxylp1       | 2-phosphoxylase phosphatase 1                                                            | 17.09734 | 16.23595 | 18.33871 | 19.08583 | 17.62523 | 19.22325 |
| 17488076    | LOC101055953 | 39S ribosomal protein L41, mitochondrial-like                                            | 3.654236 | 5.689295 | 6.992896 | 3.170785 | 5.360286 | 4.265604 |
| 17419980    | Hmgcl        | 3-hydroxy-3-methylglutaryl-Coenzyme A lyase                                              | 261.4969 | 309.4645 | 270.1712 | 268.4017 | 272.9249 | 267.2878 |
| 17295233    | Hmgcr        | 3-hydroxy-3-methylglutaryl-Coenzyme A reductase                                          | 80.60738 | 57.27803 | 87.4781  | 48.03153 | 83.67125 | 47.88958 |
| 17290173    | Hmgcs1       | 3-hydroxy-3-methylglutaryl-Coenzyme A synthase 1                                         | 514.0839 | 358.1053 | 448.508  | 349.5076 | 474.0975 | 296.3771 |
| 17400862    | Hmgcs2       | 3-hydroxy-3-methylglutaryl-Coenzyme A synthase 2                                         | 2976.993 | 3434.109 | 3376.681 | 3029.744 | 2700.311 | 2724.602 |
| 17381892    | Hacd1        | 3-hydroxyacyl-CoA dehydratase 1                                                          | 16.27426 | 17.18538 | 17.4474  | 15.82781 | 14.29917 | 14.03016 |
| 17325198    | Hacd2        | 3-hydroxyacyl-CoA dehydratase 2                                                          | 280.2771 | 330.0956 | 382.1831 | 285.0162 | 298.333  | 302.2168 |
| 17528229    | Hacd3        | 3-hydroxyacyl-CoA dehydratase 3                                                          | 241.3562 | 267.21   | 299.0121 | 269.5576 | 267.21   | 239.1928 |
| 17427051    | Hacd4        | 3-hydroxyacyl-CoA dehydratase 4                                                          | 6.109228 | 5.26298  | 5.853096 | 5.628537 | 4.113282 | 4.298103 |
| 17347650    | Haao         | 3-hydroxyanthranilate 3,4-dioxygenase                                                    | 459.471  | 376.2949 | 396.6465 | 436.8608 | 467.7812 | 483.7608 |
| 17324643    | Bdh1         | 3-hydroxybutyrate dehydrogenase, type 1                                                  | 171.2084 | 186.5036 | 163.2705 | 154.3862 | 145.3039 | 164.4836 |
| 17402846    | Bdh2         | 3-hydroxybutyrate dehydrogenase, type 2                                                  | 15.99834 | 18.02528 | 13.63951 | 15.94011 | 12.24508 | 15.76376 |
| 17466908    | Hibadh       | 3-hydroxyisobutyrate dehydrogenase                                                       | 391.5628 | 409.4973 | 360.5286 | 404.8911 | 365.5969 | 491.6814 |
| 17466919    | Hibadh       | 3-hydroxyisobutyrate dehydrogenase                                                       | 11.55255 | 11.55255 | 7.719246 | 11.50086 | 10.39156 | 8.952248 |
| 17212792    | Hibch        | 3-hydroxyisobutyryl-Coenzyme A hydrolase                                                 | 121.8219 | 130.5718 | 127.9282 | 142.1441 | 97.70564 | 145.4007 |
| 17519550    | Hmgcl1       | 3-hydroxymethyl-3-methylglutaryl-Coenzyme A lyase-like 1                                 | 8.993982 | 6.76275  | 7.060205 | 6.781103 | 6.117448 | 6.991393 |
| 17226049    | Kdsr         | 3-ketodihydrosphingosine reductase                                                       | 73.65186 | 104.0873 | 104.9218 | 91.87306 | 68.74534 | 76.72208 |
| 17309802    | Oxct1        | 3-oxoacid CoA transferase 1                                                              | 11.32815 | 11.96277 | 11.8576  | 11.85842 | 11.96277 | 14.8062  |
| 17429685    | Oxct2a       | 3-oxoacid CoA transferase 2A                                                             | 2.769758 | 3.339703 | 3.009972 | 3.339703 | 3.56497  | 3.146221 |
| 17418154    | Oxct2b       | 3-oxoacid CoA transferase 2B                                                             | 2.798454 | 5.314043 | 3.139054 | 3.299026 | 3.546092 | 2.314836 |
| 17303599    | Oxsm         | 3-oxoacyl-ACP synthase, mitochondrial                                                    | 13.18522 | 13.30116 | 13.07773 | 14.13187 | 13.39423 | 15.482   |
| 17402681    | Papss1       | 3-phosphoadenosine 5-phosphosulfate synthase 1                                           | 36.37865 | 26.68709 | 27.14473 | 27.14473 | 30.96679 | 24.94433 |
| 17358690    | Papss2       | 3-phosphoadenosine 5-phosphosulfate synthase 2                                           | 441.6715 | 493.8024 | 666.3748 | 589.8564 | 400.2645 | 593.4571 |
| 17408273    | Phgdh        | 3-phosphoglycerate dehydrogenase                                                         | 12.60068 | 12.7106  | 10.09935 | 12.86384 | 17.4905  | 11.74366 |
| 17349803    | Gm6756       | 3-phosphoglycerate dehydrogenase pseudogene                                              | 2.914705 | 2.940701 | 4.021629 | 4.130367 | 2.621695 | 3.140621 |
| 17508568    | Gm8096       | 3-phosphoglycerate dehydrogenase pseudogene                                              | 6.46455  | 6.779505 | 8.67095  | 8.286139 | 7.854612 | 8.376398 |
| 17341690    | Pdpk1        | 3-phosphoinositide dependent protein kinase 1                                            | 77.46163 | 77.65194 | 71.79592 | 71.79592 | 61.47466 | 64.07812 |
| 17313427    | LOC102634709 | 40S ribosomal protein S14                                                                | 16.68766 | 10.93878 | 17.98348 | 13.97504 | 17.67086 | 21.06447 |
| 17524967    | Gm6607       | 40S ribosomal protein S20 pseudogene                                                     | 2.67402  | 2.770065 | 2.893027 | 3.880143 | 2.68751  | 2.827329 |
| 17547978    | LOC102638850 | 40S ribosomal protein S21 pseudogene                                                     | 60.47974 | 62.68464 | 69.98384 | 66.01171 | 60.20619 | 63.5945  |
| 17325933    | LOC102641930 | 40S ribosomal protein S24-like                                                           | 3.381258 | 3.883991 | 3.040334 | 2.927826 | 3.263862 | 3.659001 |
| 17349588    | LOC102638785 | 40S ribosomal protein S25                                                                | 3.685448 | 2.627717 | 3.420293 | 3.356854 | 4.205799 | 2.968636 |
| 17512752    | LOC102642963 | 40S ribosomal protein S26-like                                                           | 215.9106 | 242.6428 | 329.4099 | 244.3559 | 270.13   | 251.562  |
| 17440754    | Gm3511       | 40S ribosomal protein S28 pseudogene                                                     | 129.9678 | 175.7877 | 229.4538 | 168.8841 | 231.4409 | 182.2127 |
| 17512474    | LOC105243270 | 40S ribosomal protein S2-like                                                            | 1498.476 | 1476.064 | 1623.577 | 1535.891 | 1682.476 | 1730.34  |
| 17358223    | LOC102638448 | 40S ribosomal protein S7 pseudogene                                                      | 1024.284 | 971.2709 | 935.8607 | 975.4067 | 1004.993 | 1105.007 |
| 17322750    | Abat         | 4-aminobutyrate aminotransferase                                                         | 488.0787 | 463.8646 | 444.0043 | 503.9057 | 419.1811 | 495.7607 |
| 17510264    | Haus8        | 4HAUS augmin-like complex, subunit 8                                                     | 15.83637 | 19.16059 | 17.23596 | 16.7586  | 12.39348 | 15.83637 |
| 17359504    | Hoga1        | 4-hydroxy-2-oxoglutarate aldolase 1                                                      | 120.9578 | 153.0946 | 136.7095 | 119.6677 | 136.4274 | 135.673  |
| 17428731    | Hpd1         | 4-hydroxyphenylpyruvate dioxygenase-like                                                 | 5.009199 | 5.672835 | 5.187107 | 4.366811 | 4.72587  | 6.212009 |
| 17452578    | Hpd          | 4-hydroxyphenylpyruvic acid dioxygenase                                                  | 2483.691 | 2736.147 | 2775.304 | 2874.071 | 2624.724 | 3057.125 |
| 17246860    | Nipsnap1     | 4-nitrophenylphosphatase domain and non-neuronal SNAP25-like protein homolog             | 239.0022 | 229.8964 | 222.725  | 237.2444 | 218.1036 | 250.4467 |
| 17238199    | Sdr9c7       | 4short chain dehydrogenase/reductase family 9C, member 7                                 | 49.92394 | 30.08516 | 20.55561 | 28.29451 | 24.40424 | 22.40921 |
| 17351168    | Htr4         | 5 hydroxytryptamine (serotonin) receptor 4                                               | 3.850538 | 4.044777 | 5.003335 | 4.240928 | 3.993933 | 5.213673 |

|          |              |                                                                              |          |          |          |          |          |          |
|----------|--------------|------------------------------------------------------------------------------|----------|----------|----------|----------|----------|----------|
| 17520073 | Nt5e         | 5 nucleotidase, ecto                                                         | 34.15394 | 34.11986 | 59.25151 | 36.95865 | 39.96236 | 41.26481 |
| 17520177 | Mthfs        | 5, 10-methylenetetrahydrofolate synthetase                                   | 7.576754 | 7.828359 | 7.811123 | 9.46131  | 9.013891 | 8.334179 |
| 17529569 | Mthfsl       | 5, 10-methylenetetrahydrofolate synthetase-like                              | 133.7662 | 115.3721 | 113.2    | 120.7149 | 153.1626 | 134.4448 |
| 17421550 | Mthfr        | 5,10-methylenetetrahydrofolate reductase                                     | 33.98839 | 23.45608 | 22.06197 | 23.02102 | 25.56645 | 19.23631 |
| 17271911 | Nt5c         | 5,3-nucleotidase, cytosolic                                                  | 62.3795  | 70.49456 | 66.2317  | 69.43254 | 73.82359 | 74.57809 |
| 17250307 | Nt5m         | 5,3-nucleotidase, mitochondrial                                              | 14.57749 | 14.31296 | 15.90568 | 17.00244 | 12.51043 | 12.65864 |
| 17520492 | Xrn1         | 5-3 exoribonuclease 1                                                        | 34.02893 | 34.63791 | 32.12757 | 35.30596 | 38.82382 | 31.88531 |
| 17377283 | Xrn2         | 5-3 exoribonuclease 2                                                        | 56.54039 | 51.60075 | 54.99887 | 58.01041 | 59.61031 | 55.47785 |
| 17213990 | Atic         | 5-aminimidazole-4-carboxamide ribonucleotide formyltransferase/IMP cyclohydr | 35.7148  | 48.6322  | 39.15705 | 37.78024 | 33.11424 | 37.76061 |
| 17522848 | Azi2         | 5-azacytidine induced gene 2                                                 | 43.91829 | 34.68476 | 41.73917 | 38.5912  | 49.33228 | 44.2161  |
| 17460603 | Hmces        | 5-hydroxymethylcytosine (hmC) binding, ES cell specific                      | 10.5291  | 14.99802 | 12.00572 | 11.66965 | 11.56746 | 11.56746 |
| 17289656 | Htr1a        | 5-hydroxytryptamine (serotonin) receptor 1A                                  | 3.334568 | 3.168676 | 3.336695 | 3.720483 | 3.728305 | 3.252322 |
| 17529218 | Htr1b        | 5-hydroxytryptamine (serotonin) receptor 1B                                  | 4.743559 | 5.48933  | 5.48933  | 4.606401 | 5.48933  | 6.035319 |
| 17420113 | Htr1d        | 5-hydroxytryptamine (serotonin) receptor 1D                                  | 7.186205 | 6.597594 | 8.145538 | 7.085109 | 6.918983 | 6.714407 |
| 17331431 | Htr1f        | 5-hydroxytryptamine (serotonin) receptor 1F                                  | 3.407822 | 2.991668 | 3.229319 | 2.991668 | 3.133381 | 2.939641 |
| 17301926 | Htr2a        | 5-hydroxytryptamine (serotonin) receptor 2A                                  | 6.393164 | 7.105273 | 5.726882 | 6.891414 | 6.062698 | 6.615224 |
| 17225138 | Htr2b        | 5-hydroxytryptamine (serotonin) receptor 2B                                  | 4.503667 | 5.775116 | 4.639406 | 5.332566 | 4.288818 | 5.075078 |
| 17538411 | Htr2c        | 5-hydroxytryptamine (serotonin) receptor 2C                                  | 2.76389  | 3.279919 | 3.110141 | 2.501373 | 2.722685 | 2.915615 |
| 17526717 | Htr3a        | 5-hydroxytryptamine (serotonin) receptor 3A                                  | 4.555218 | 5.308153 | 4.841654 | 4.776123 | 4.626624 | 5.55921  |
| 17526729 | Htr3b        | 5-hydroxytryptamine (serotonin) receptor 3B                                  | 7.062113 | 6.697673 | 6.182799 | 7.419233 | 5.053875 | 5.064957 |
| 17435570 | Htr5a        | 5-hydroxytryptamine (serotonin) receptor 5A                                  | 8.663981 | 10.78138 | 7.103204 | 6.384705 | 6.732956 | 9.050202 |
| 17226364 | Htr5b        | 5-hydroxytryptamine (serotonin) receptor 5B                                  | 3.793002 | 6.069384 | 4.654996 | 4.816783 | 3.75442  | 5.323223 |
| 17431853 | Htr6         | 5-hydroxytryptamine (serotonin) receptor 6                                   | 7.80728  | 5.669769 | 5.369359 | 5.893644 | 4.923281 | 6.466926 |
| 17364169 | Htr7         | 5-hydroxytryptamine (serotonin) receptor 7                                   | 3.759029 | 3.985774 | 3.99745  | 3.757205 | 3.486501 | 3.34647  |
| 17290565 | Mtr          | 5-methyltetrahydrofolate-homocysteine methyltransferase                      | 21.17882 | 21.68101 | 18.39625 | 19.6908  | 13.00325 | 23.56412 |
| 17294066 | Mtrr         | 5-methyltetrahydrofolate-homocysteine methyltransferase reductase            | 19.03496 | 20.36486 | 21.05236 | 20.78067 | 19.28517 | 20.27261 |
| 17240199 | Nt5dc1       | 5-nucleotidase domain containing 1                                           | 50.37863 | 53.17403 | 44.92697 | 50.67984 | 43.4297  | 50.52201 |
| 17298364 | Nt5dc2       | 5-nucleotidase domain containing 2                                           | 15.32102 | 21.97605 | 27.68591 | 17.69414 | 16.38041 | 13.96061 |
| 17236227 | Nt5dc3       | 5-nucleotidase domain containing 3                                           | 31.54479 | 24.62326 | 19.13696 | 17.63965 | 21.90897 | 23.82443 |
| 17418168 | Nt5c1a       | 5-nucleotidase, cytosolic IA                                                 | 7.325159 | 6.560474 | 6.836415 | 7.519465 | 7.401358 | 6.687004 |
| 17274031 | Nt5c1b       | 5-nucleotidase, cytosolic IB                                                 | 3.489814 | 3.429409 | 3.237365 | 3.415673 | 3.485873 | 3.634306 |
| 17365421 | Nt5c2        | 5-nucleotidase, cytosolic II                                                 | 39.71577 | 54.80061 | 66.48606 | 41.16568 | 42.69455 | 42.95458 |
| 17467128 | Nt5c3        | 5-nucleotidase, cytosolic IIC                                                | 24.44758 | 31.51223 | 25.95265 | 25.73286 | 29.03598 | 26.12067 |
| 17269498 | Nt5c3b       | 5-nucleotidase, cytosolic IIIB                                               | 7.988751 | 8.345567 | 7.814535 | 7.814535 | 6.134858 | 6.850503 |
| 17318428 | Oplah        | 5-oxoprolinase (ATP-hydrolysing)                                             | 227.1214 | 235.8719 | 220.0199 | 225.5416 | 179.4154 | 165.7621 |
| 17249328 | Phykpl       | 5-phosphohydroxy-L-lysine phospholyase                                       | 26.89862 | 26.00992 | 30.10122 | 29.29799 | 24.21585 | 29.38504 |
| 17388099 | LOC102632821 | 60S acidic ribosomal protein P1-like                                         | 9.302574 | 8.79571  | 8.467112 | 10.74706 | 7.972156 | 9.686919 |
| 17548211 | LOC102632821 | 60S acidic ribosomal protein P1-like                                         | 17.80944 | 14.89597 | 14.13079 | 21.66073 | 12.99018 | 16.57124 |
| 17548369 | LOC102637947 | 60S acidic ribosomal protein P1-like                                         | 36.23595 | 37.37522 | 30.60319 | 37.75642 | 38.34243 | 40.15367 |
| 17548373 | LOC102637947 | 60S acidic ribosomal protein P1-like                                         | 42.70639 | 43.65122 | 38.76116 | 42.43492 | 39.11093 | 43.19613 |
| 17548597 | LOC102641848 | 60S ribosomal protein L15-like                                               | 253.9604 | 228.5174 | 192.5608 | 208.6281 | 202.5354 | 208.6281 |
| 17352102 | Gm6133       | 60S ribosomal protein L17 pseudogene                                         | 18.4099  | 19.28036 | 22.58229 | 27.89452 | 21.26811 | 20.89332 |
| 17476693 | LOC102638521 | 60S ribosomal protein L23a                                                   | 9.793944 | 6.996096 | 6.474864 | 7.867199 | 4.272469 | 9.074512 |
| 17548840 | LOC102636101 | 60S ribosomal protein L39 pseudogene                                         | 5.765837 | 5.871585 | 5.906649 | 6.596085 | 5.763    | 6.082692 |
| 17286228 | LOC105245385 | 60S ribosomal protein L7a-like                                               | 61.20171 | 64.80261 | 70.50482 | 80.67389 | 58.0933  | 79.97072 |
| 17538590 | Plkfb1       | 6-phosphofructo-2-kinase/fructose-2,6-biphosphatase 1                        | 60.37712 | 64.32288 | 88.41321 | 92.23676 | 107.3531 | 96.72655 |
| 17226676 | Plkfb2       | 6-phosphofructo-2-kinase/fructose-2,6-biphosphatase 2                        | 24.1381  | 26.6215  | 27.36045 | 31.89238 | 28.73705 | 30.63502 |
| 17381630 | Plkfb3       | 6-phosphofructo-2-kinase/fructose-2,6-biphosphatase 3                        | 16.89624 | 23.42781 | 18.65874 | 16.73156 | 19.03615 | 14.08951 |
| 17522110 | Plkfb4       | 6-phosphofructo-2-kinase/fructose-2,6-biphosphatase 4                        | 5.75055  | 6.72032  | 7.315315 | 5.592138 | 5.888948 | 5.985451 |
| 17502249 | Pgls         | 6-phosphogluconolactonase                                                    | 43.5014  | 39.8299  | 49.63583 | 52.17729 | 42.55244 | 50.85508 |
| 17526813 | Pts          | 6-pyruvoyl-tetrahydropterin synthase                                         | 49.19876 | 57.04387 | 59.01705 | 51.293   | 58.35644 | 62.68333 |
| 17485357 | Dhcr7        | 7-dehydrocholesterol reductase                                               | 67.54514 | 63.61478 | 89.69589 | 83.67763 | 88.62796 | 71.52571 |
| 17461625 | Ogg1         | 8-oxoguanine DNA-glycosylase 1                                               | 9.248119 | 14.14657 | 13.52644 | 15.88849 | 15.15508 | 11.73048 |
| 17519088 | Adam10       | a disintegrin and metallopeptidase domain 10                                 | 95.05035 | 88.58927 | 96.61665 | 84.23571 | 81.36125 | 78.36894 |
| 17256991 | Adam11       | a disintegrin and metallopeptidase domain 11                                 | 12.44798 | 17.1755  | 26.61062 | 16.77522 | 13.79793 | 13.0674  |
| 17497246 | Adam12       | a disintegrin and metallopeptidase domain 12 (meltrin alpha)                 | 5.433644 | 5.433644 | 5.433644 | 5.433644 | 5.94353  | 5.672678 |
| 17407017 | Adam15       | a disintegrin and metallopeptidase domain 15 (metargidin)                    | 11.16375 | 15.19126 | 14.93743 | 12.29739 | 11.99    | 12.97929 |
| 17280207 | Adam17       | a disintegrin and metallopeptidase domain 17                                 | 44.09307 | 36.08482 | 36.30132 | 40.65188 | 37.15437 | 36.21888 |
| 17508202 | Adam18       | a disintegrin and metallopeptidase domain 18                                 | 3.649857 | 3.158107 | 3.304541 | 3.816526 | 3.715046 | 4.077599 |
| 17248754 | Adam19       | a disintegrin and metallopeptidase domain 19 (meltrin beta)                  | 4.27638  | 5.963503 | 4.629544 | 4.03095  | 5.024604 | 5.085607 |
| 17452204 | Adam1a       | a disintegrin and metallopeptidase domain 1a                                 | 4.057834 | 4.684516 | 3.194345 | 4.281926 | 6.32388  | 4.638409 |
| 17452201 | Adam1b       | a disintegrin and metallopeptidase domain 1b                                 | 2.908812 | 4.047132 | 2.823276 | 4.083001 | 4.615158 | 4.038137 |
| 17307815 | Adam2        | a disintegrin and metallopeptidase domain 2                                  | 3.433405 | 3.370167 | 3.880762 | 3.668576 | 3.668576 | 3.078783 |
| 17500707 | Adam20       | a disintegrin and metallopeptidase domain 20                                 | 2.543562 | 2.454212 | 3.350114 | 2.304206 | 2.804163 | 2.220785 |
| 17282363 | Adam21       | a disintegrin and metallopeptidase domain 21                                 | 3.613307 | 3.150695 | 3.959285 | 3.873452 | 3.871708 | 4.291107 |
| 17445467 | Adam22       | a disintegrin and metallopeptidase domain 22                                 | 3.270633 | 3.341486 | 3.342228 | 3.97857  | 3.748673 | 3.024905 |
| 17213608 | Adam23       | a disintegrin and metallopeptidase domain 23                                 | 45.19809 | 46.26598 | 59.11736 | 49.55745 | 47.17989 | 25.02174 |
| 17500697 | Adam24       | a disintegrin and metallopeptidase domain 24 (testase 1)                     | 4.628357 | 4.203439 | 4.036878 | 3.864093 | 3.624822 | 3.843285 |
| 17500702 | Adam25       | a disintegrin and metallopeptidase domain 25 (testase 2)                     | 2.44103  | 2.42871  | 1.972465 | 1.898013 | 2.759544 | 2.346906 |
| 17509005 | Adam26a      | a disintegrin and metallopeptidase domain 26A (testase 3)                    | 2.406006 | 2.285991 | 1.898013 | 1.982183 | 2.285991 | 2.285991 |
| 17509001 | Adam26b      | a disintegrin and metallopeptidase domain 26B                                | 3.11096  | 2.386093 | 2.209822 | 2.574853 | 2.763008 | 2.60189  |
| 17308099 | Adam28       | a disintegrin and metallopeptidase domain 28                                 | 4.440124 | 4.165819 | 4.291316 | 3.761583 | 3.359299 | 3.959724 |
| 17509428 | Adam29       | a disintegrin and metallopeptidase domain 29                                 | 2.473116 | 2.393945 | 2.335902 | 2.707047 | 2.573693 | 2.722364 |
| 17508224 | Adam3        | a disintegrin and metallopeptidase domain 3 (cyritestin)                     | 4.75795  | 3.962827 | 4.447609 | 3.286268 | 5.118177 | 4.311291 |
| 17400849 | Adam30       | a disintegrin and metallopeptidase domain 30                                 | 3.062691 | 2.462203 | 2.400425 | 2.681462 | 2.919599 | 2.400425 |
| 17508278 | Adam32       | a disintegrin and metallopeptidase domain 32                                 | 2.822708 | 3.457981 | 3.076628 | 3.40395  | 2.920388 | 2.933474 |
| 17391803 | Adam33       | a disintegrin and metallopeptidase domain 33                                 | 8.953179 | 9.52362  | 10.34413 | 7.583795 | 8.403673 | 9.58707  |
| 17509013 | Adam34       | a disintegrin and metallopeptidase domain 34                                 | 2.974238 | 2.919862 | 2.587843 | 2.664565 | 2.440505 | 2.284724 |
| 17500712 | Adam39       | a disintegrin and metallopeptidase domain 39                                 | 3.024968 | 2.391026 | 3.339703 | 2.957524 | 3.723992 | 3.565341 |
| 17282343 | Adam4        | a disintegrin and metallopeptidase domain 4                                  | 2.705003 | 3.249573 | 3.241519 | 5.573602 | 3.491604 | 3.037175 |
| 17508253 | Adam5        | a disintegrin and metallopeptidase domain 5                                  | 2.968636 | 2.51809  | 2.782767 | 2.6815   | 2.782767 | 2.782767 |
| 17279542 | Adam6a       | a disintegrin and metallopeptidase domain 6A                                 | 3.874956 | 3.811344 | 3.113527 | 4.271344 | 3.860105 | 3.504333 |
| 17279539 | Adam6b       | a disintegrin and metallopeptidase domain 6B                                 | 2.212182 | 2.239691 | 1.884472 | 2.667374 | 2.239691 | 2.14716  |
| 17308058 | Adam7        | a disintegrin and metallopeptidase domain 7                                  | 3.211217 | 2.862846 | 2.587125 | 2.838148 | 3.374234 | 2.943291 |

|          |          |                                                                                   |          |          |          |          |          |          |
|----------|----------|-----------------------------------------------------------------------------------|----------|----------|----------|----------|----------|----------|
| 17497525 | Adam8    | a disintegrin and metallopeptidase domain 8                                       | 4.86136  | 4.937155 | 3.723011 | 4.741258 | 5.445294 | 4.655932 |
| 17508300 | Adam9    | a disintegrin and metallopeptidase domain 9 (meltrin gamma)                       | 133.8302 | 131.5703 | 132.3845 | 115.404  | 114.7396 | 109.4183 |
| 17331705 | Adams1   | a disintegrin-like and metallopeptidase (reprolysin type) with thrombospondin typ | 27.22028 | 22.29456 | 27.25899 | 24.40052 | 23.81618 | 22.83476 |
| 17336086 | Adams10  | a disintegrin-like and metallopeptidase (reprolysin type) with thrombospondin typ | 11.78933 | 12.30472 | 12.10961 | 11.28958 | 12.55056 | 10.39833 |
| 17310368 | Adams12  | a disintegrin-like and metallopeptidase (reprolysin type) with thrombospondin typ | 8.349848 | 7.260556 | 9.079797 | 7.15891  | 7.15891  | 6.319016 |
| 17368422 | Adams13  | a disintegrin-like and metallopeptidase (reprolysin type) with thrombospondin typ | 12.35189 | 11.13863 | 9.787565 | 11.37883 | 8.958828 | 12.31487 |
| 17241181 | Adams14  | a disintegrin-like and metallopeptidase (reprolysin type) with thrombospondin typ | 10.81926 | 14.03736 | 12.53708 | 12.39048 | 12.53708 | 12.38739 |
| 17525224 | Adams15  | a disintegrin-like and metallopeptidase (reprolysin type) with thrombospondin typ | 7.473997 | 7.097003 | 6.826802 | 6.478815 | 5.619298 | 6.489422 |
| 17294187 | Adams16  | a disintegrin-like and metallopeptidase (reprolysin type) with thrombospondin typ | 6.279806 | 7.673421 | 7.529113 | 5.978444 | 6.153341 | 8.01732  |
| 17479041 | Adams17  | a disintegrin-like and metallopeptidase (reprolysin type) with thrombospondin typ | 10.32514 | 10.7052  | 10.09165 | 10.63509 | 11.39738 | 11.94289 |
| 17513240 | Adams18  | a disintegrin-like and metallopeptidase (reprolysin type) with thrombospondin typ | 3.225382 | 3.742286 | 3.596566 | 3.596566 | 3.940667 | 4.031146 |
| 17350876 | Adams19  | a disintegrin-like and metallopeptidase (reprolysin type) with thrombospondin typ | 5.637361 | 4.509352 | 4.699607 | 4.865405 | 4.849278 | 5.689848 |
| 17249206 | Adams2   | a disintegrin-like and metallopeptidase (reprolysin type) with thrombospondin typ | 19.04777 | 21.43624 | 18.10655 | 22.44621 | 17.85059 | 23.5973  |
| 17320737 | Adams20  | a disintegrin-like and metallopeptidase (reprolysin type) with thrombospondin typ | 3.623616 | 3.911874 | 4.42467  | 3.961893 | 3.961893 | 3.961893 |
| 17449488 | Adams3   | a disintegrin-like and metallopeptidase (reprolysin type) with thrombospondin typ | 4.240223 | 3.660473 | 3.403408 | 3.722418 | 4.70003  | 3.722418 |
| 17219248 | Adams4   | a disintegrin-like and metallopeptidase (reprolysin type) with thrombospondin typ | 6.528538 | 6.429159 | 8.873234 | 6.221662 | 6.458325 | 5.226735 |
| 17331720 | Adams5   | a disintegrin-like and metallopeptidase (reprolysin type) with thrombospondin typ | 5.625885 | 6.010646 | 5.184878 | 5.884745 | 5.990889 | 5.08388  |
| 17289602 | Adams6   | a disintegrin-like and metallopeptidase (reprolysin type) with thrombospondin typ | 8.318826 | 12.19662 | 15.18284 | 10.17911 | 9.764729 | 10.50679 |
| 17520254 | Adams7   | a disintegrin-like and metallopeptidase (reprolysin type) with thrombospondin typ | 8.518444 | 7.698994 | 6.922773 | 7.4755   | 6.170982 | 7.698994 |
| 17515703 | Adams8   | a disintegrin-like and metallopeptidase (reprolysin type) with thrombospondin typ | 5.192359 | 4.951995 | 4.623835 | 4.689389 | 5.425214 | 4.975391 |
| 17469136 | Adams9   | a disintegrin-like and metallopeptidase (reprolysin type) with thrombospondin typ | 14.56264 | 21.542   | 18.19538 | 16.24969 | 14.75007 | 17.23596 |
| 17231423 | Akap12   | A kinase (PRKA) anchor protein (gravin) 12                                        | 15.88188 | 16.89717 | 16.15815 | 18.32181 | 18.10342 | 19.06877 |
| 17434414 | Akap9    | A kinase (PRKA) anchor protein (yotiao) 9                                         | 67.22798 | 67.22798 | 67.22798 | 64.01642 | 61.2208  | 67.22798 |
| 17267584 | Akap1    | A kinase (PRKA) anchor protein 1                                                  | 158.2136 | 158.3233 | 154.5607 | 149.9606 | 166.3053 | 143.2062 |
| 17263929 | Akap10   | A kinase (PRKA) anchor protein 10                                                 | 22.47766 | 24.08762 | 26.38288 | 26.54411 | 28.51027 | 24.28847 |
| 17308829 | Akap11   | A kinase (PRKA) anchor protein 11                                                 | 39.33332 | 46.11678 | 50.9507  | 46.88615 | 50.84838 | 55.23229 |
| 17479205 | Akap13   | A kinase (PRKA) anchor protein 13                                                 | 85.02764 | 88.99054 | 80.78077 | 73.3828  | 80.78077 | 79.02187 |
| 17541028 | Akap14   | A kinase (PRKA) anchor protein 14                                                 | 5.769795 | 5.426267 | 4.496336 | 5.759206 | 5.719504 | 5.69936  |
| 17540950 | Akap17b  | A kinase (PRKA) anchor protein 17B                                                | 14.6554  | 9.575315 | 6.572535 | 8.670829 | 9.862272 | 9.616154 |
| 17414364 | Akap2    | A kinase (PRKA) anchor protein 2                                                  | 16.39382 | 14.65052 | 15.46248 | 13.49553 | 14.48663 | 15.24992 |
| 17463308 | Akap3    | A kinase (PRKA) anchor protein 3                                                  | 2.663512 | 3.263862 | 2.940497 | 3.009972 | 3.269727 | 2.88936  |
| 17532786 | Akap4    | A kinase (PRKA) anchor protein 4                                                  | 5.146851 | 5.48933  | 5.129684 | 4.672064 | 5.48933  | 5.252412 |
| 17276552 | Akap5    | A kinase (PRKA) anchor protein 5                                                  | 19.50457 | 20.22854 | 18.81746 | 20.22307 | 19.75875 | 23.0132  |
| 17275436 | Akap6    | A kinase (PRKA) anchor protein 6                                                  | 3.650793 | 3.945177 | 3.945177 | 3.816499 | 3.521964 | 4.283648 |
| 17239856 | Akap7    | A kinase (PRKA) anchor protein 7                                                  | 15.27584 | 20.54549 | 19.57052 | 15.61175 | 16.167   | 22.29441 |
| 17343371 | Akap8    | A kinase (PRKA) anchor protein 8                                                  | 36.88008 | 49.39284 | 38.64286 | 45.49512 | 48.16356 | 40.23279 |
| 17343387 | Akap8l   | A kinase (PRKA) anchor protein 8-like                                             | 24.82772 | 37.5669  | 34.15275 | 37.5669  | 32.71408 | 41.90353 |
| 17481684 | Akip1    | A kinase (PRKA) interacting protein 1                                             | 42.90518 | 43.23986 | 48.51873 | 35.68807 | 35.35029 | 36.00561 |
| 17378628 | Aar2     | AAR2 splicing factor homolog (S. cerevisiae)                                      | 23.82196 | 22.41636 | 25.83079 | 26.0628  | 23.29454 | 19.55438 |
| 17277697 | Adck1    | aarF domain containing kinase 1                                                   | 21.79114 | 28.73287 | 25.45382 | 28.15326 | 24.02859 | 24.92307 |
| 17457524 | Adck2    | aarF domain containing kinase 2                                                   | 11.84889 | 9.79829  | 12.46698 | 13.13787 | 11.84889 | 12.85965 |
| 17230408 | Adck3    | aarF domain containing kinase 3                                                   | 170.3727 | 146.1322 | 108.3376 | 193.2695 | 135.7718 | 184.8562 |
| 17475542 | Adck4    | aarF domain containing kinase 4                                                   | 29.15073 | 34.15678 | 33.31662 | 32.4593  | 33.66272 | 32.00244 |
| 17312511 | Adck5    | aarF domain containing kinase 5                                                   | 93.204   | 89.26607 | 83.05874 | 86.0677  | 63.2139  | 59.32466 |
| 17231973 | Ahi1     | Abelson helper integration site 1                                                 | 5.347483 | 5.347483 | 5.193294 | 6.268846 | 5.037821 | 5.38367  |
| 17435946 | Abhd1    | abhydrolase domain containing 1                                                   | 7.544838 | 12.71192 | 13.86033 | 13.86033 | 8.725392 | 14.5691  |
| 17330692 | Abhd10   | abhydrolase domain containing 10                                                  | 9.590393 | 9.516031 | 8.300395 | 9.778072 | 14.70271 | 10.70572 |
| 17443154 | Abhd11   | abhydrolase domain containing 11                                                  | 43.01447 | 39.83101 | 35.28199 | 43.87478 | 47.3404  | 41.49168 |
| 17453506 | Abhd11os | abhydrolase domain containing 11, opposite strand                                 | 14.52    | 14.11845 | 14.92822 | 16.99608 | 16.79582 | 16.08529 |
| 17392730 | Abhd12   | abhydrolase domain containing 12                                                  | 37.19482 | 31.19753 | 40.17065 | 40.3294  | 37.58799 | 37.66885 |
| 17275986 | Abhd12b  | abhydrolase domain containing 12B                                                 | 6.171709 | 6.480073 | 5.997204 | 6.491537 | 6.768612 | 7.759157 |
| 17498892 | Abhd13   | abhydrolase domain containing 13                                                  | 32.65156 | 32.65156 | 26.38873 | 34.78106 | 27.0465  | 32.65156 |
| 17530686 | Abhd14a  | abhydrolase domain containing 14A                                                 | 13.83403 | 13.42007 | 13.42007 | 13.72087 | 15.70814 | 13.45873 |
| 17521211 | Abhd14b  | abhydrolase domain containing 14b                                                 | 196.5388 | 190.881  | 197.6398 | 182.8897 | 204.7061 | 184.6142 |
| 17253297 | Abhd15   | abhydrolase domain containing 15                                                  | 29.7317  | 30.60361 | 41.95585 | 39.14131 | 39.19207 | 42.51087 |
| 17336939 | Abhd16a  | abhydrolase domain containing 16A                                                 | 32.66831 | 42.7209  | 39.90451 | 34.58777 | 48.70068 | 42.49968 |
| 17381039 | Abhd16b  | abhydrolase domain containing 16B                                                 | 3.843179 | 3.703322 | 4.072797 | 4.092578 | 3.650211 | 4.05036  |
| 17243014 | Abhd17a  | abhydrolase domain containing 17A                                                 | 45.5535  | 35.94627 | 37.60571 | 39.09521 | 41.6643  | 44.2842  |
| 17358132 | Abhd17b  | abhydrolase domain containing 17B                                                 | 35.89647 | 36.74357 | 37.55596 | 44.95657 | 33.96672 | 40.11973 |
| 17492978 | Abhd17c  | abhydrolase domain containing 17C                                                 | 172.164  | 153.8969 | 163.4868 | 146.0248 | 160.4511 | 145.951  |
| 17479354 | Abhd2    | abhydrolase domain containing 2                                                   | 158.6452 | 242.7521 | 309.6726 | 170.1649 | 251.9459 | 166.1992 |
| 17352680 | Abhd3    | abhydrolase domain containing 3                                                   | 137.6328 | 141.5374 | 128.4925 | 123.3086 | 111.0565 | 115.6619 |
| 17300251 | Abhd4    | abhydrolase domain containing 4                                                   | 137.9307 | 162.8726 | 148.2769 | 130.8464 | 112.3986 | 114.3482 |
| 17523416 | Abhd5    | abhydrolase domain containing 5                                                   | 54.65532 | 47.68653 | 52.70727 | 52.2946  | 53.85506 | 45.65687 |
| 17297059 | Abhd6    | abhydrolase domain containing 6                                                   | 154.6593 | 182.2191 | 211.5434 | 154.9899 | 113.9234 | 149.0053 |
| 17510311 | Abhd8    | abhydrolase domain containing 8                                                   | 11.7832  | 13.54896 | 10.0218  | 12.05392 | 7.843296 | 12.04398 |
| 17268227 | Abi3     | ABI gene family, member 3                                                         | 18.27855 | 18.27855 | 28.13609 | 18.66288 | 16.83988 | 13.20278 |
| 17326318 | Abi3bp   | ABI gene family, member 3 (NESH) binding protein                                  | 5.418224 | 7.343816 | 7.169189 | 6.321163 | 5.173426 | 6.753007 |
| 17382156 | Abi1     | abl-interactor 1                                                                  | 70.75401 | 72.4483  | 70.02946 | 66.20646 | 75.28184 | 73.28063 |
| 17213446 | Abi2     | abl-interactor 2                                                                  | 19.73603 | 18.99806 | 21.50932 | 14.68987 | 15.62149 | 16.35852 |
| 17383139 | Abo      | ABO blood group (transferase A, alpha 1-3-N-acetylgalactosaminyltransferase, trar | 8.397035 | 7.698994 | 7.554572 | 8.313696 | 8.185724 | 7.698994 |
| 17239501 | Abracl   | ABRA C-terminal like                                                              | 11.45376 | 8.321768 | 7.59179  | 6.886209 | 6.915243 | 8.731382 |
| 17240621 | Aim1     | absent in melanoma 1                                                              | 36.14139 | 39.80368 | 49.84925 | 49.73743 | 44.44133 | 49.57325 |
| 17419669 | Aim1l    | absent in melanoma 1-like                                                         | 6.791263 | 6.874048 | 8.225709 | 8.225709 | 8.225709 | 10.67571 |
| 17219643 | Aim2     | absent in melanoma 2                                                              | 3.021343 | 3.292971 | 3.963321 | 4.326499 | 4.29322  | 3.88884  |
| 17442719 | Aacs     | acetoacetyl-CoA synthetase                                                        | 37.93112 | 25.82775 | 31.60016 | 28.67417 | 34.18591 | 26.34231 |
| 17443523 | Ache     | acetylcholinesterase                                                              | 12.33555 | 13.06568 | 10.56294 | 11.45384 | 11.62622 | 14.33222 |
| 17527123 | Acat1    | acetyl-Coenzyme A acetyltransferase 1                                             | 938.7974 | 941.1429 | 843.8425 | 818.4894 | 816.0818 | 802.8686 |
| 17340967 | Acat2    | acetyl-Coenzyme A acetyltransferase 2                                             | 43.569   | 35.86339 | 41.53052 | 38.97994 | 36.25681 | 46.72977 |
| 17340953 | Acat3    | acetyl-Coenzyme A acetyltransferase 3                                             | 164.7061 | 198.2394 | 163.9952 | 202.4245 | 173.1874 | 207.8429 |
| 17523042 | Acaa1a   | acetyl-Coenzyme A acyltransferase 1A                                              | 78.49452 | 89.21906 | 92.96785 | 104.6218 | 77.91936 | 88.46286 |
| 17532063 | Acaa1b   | acetyl-Coenzyme A acyltransferase 1B                                              | 473.5064 | 614.6537 | 570.1944 | 540.3162 | 365.26   | 430.1542 |
| 17351811 | Acaa2    | acetyl-Coenzyme A acyltransferase 2 (mitochondrial 3-oxoacyl-Coenzyme A thiol     | 943.6186 | 945.0586 | 826.2531 | 912.4047 | 885.771  | 905.1543 |
| 17254395 | Acaca    | acetyl-Coenzyme A carboxylase alpha                                               | 82.38787 | 81.73658 | 85.70753 | 79.1902  | 89.05718 | 76.05125 |

|          |              |                                                                  |          |          |          |          |          |          |
|----------|--------------|------------------------------------------------------------------|----------|----------|----------|----------|----------|----------|
| 17274027 | Gm5182       | acetyl-Coenzyme A carboxylase alpha pseudogene                   | 1.981894 | 2.466457 | 2.732251 | 2.220785 | 2.188921 | 1.973218 |
| 17440826 | Acacb        | acetyl-Coenzyme A carboxylase beta                               | 36.51557 | 44.36254 | 79.67416 | 51.93733 | 31.8968  | 31.96276 |
| 17539734 | Asmt         | acetylserotonin O-methyltransferase                              | 20.13007 | 19.72277 | 18.07783 | 20.76209 | 21.32243 | 19.17241 |
| 17243839 | Ascl1        | achaete-scute complex homolog 1 (Drosophila)                     | 3.016154 | 3.584023 | 2.961073 | 3.44468  | 2.976589 | 2.38003  |
| 17498188 | Ascl2        | achaete-scute complex homolog 2 (Drosophila)                     | 4.800518 | 5.446729 | 5.033772 | 5.386134 | 4.775825 | 4.70192  |
| 17498193 | Ascl2        | achaete-scute complex homolog 2 (Drosophila)                     | 3.149363 | 2.904057 | 2.856285 | 3.791556 | 3.88009  | 3.400437 |
| 17494926 | Ascl3        | achaete-scute complex homolog 3 (Drosophila)                     | 3.97744  | 3.247726 | 3.718678 | 4.588237 | 3.956322 | 3.288592 |
| 17236150 | Ascl4        | achaete-scute complex homolog 4 (Drosophila)                     | 4.916972 | 4.059663 | 5.0578   | 5.386134 | 4.645584 | 4.066084 |
| 17322200 | Aaas         | achalasia, adrenocortical insufficiency, alacrimia               | 29.91153 | 30.69454 | 30.53327 | 28.28274 | 29.41642 | 33.398   |
| 17280483 | Acp1         | acid phosphatase 1, soluble                                      | 56.67183 | 66.37693 | 59.16779 | 53.33387 | 74.09427 | 52.98896 |
| 17373222 | Acp2         | acid phosphatase 2, lysosomal                                    | 102.2729 | 99.93582 | 100.4943 | 87.75199 | 90.6346  | 80.88498 |
| 17524930 | Acp5         | acid phosphatase 5, tartrate resistant                           | 94.07699 | 103.1336 | 90.02851 | 91.21948 | 101.4503 | 88.30174 |
| 17400759 | Acp6         | acid phosphatase 6, lysophosphatidic                             | 43.73844 | 51.57107 | 44.48509 | 43.18026 | 42.91619 | 42.15962 |
| 17530406 | Acpp         | acid phosphatase, prostate                                       | 18.27577 | 25.74785 | 17.8792  | 18.27577 | 22.92596 | 14.98409 |
| 17490196 | Acpt         | acid phosphatase, testicular                                     | 10.78489 | 13.70956 | 12.17644 | 10.67504 | 10.8924  | 10.46507 |
| 17518172 | Anp32a       | acidic (leucine-rich) nuclear phosphoprotein 32 family, member A | 42.56483 | 53.09853 | 52.18199 | 46.07652 | 52.21962 | 53.716   |
| 17413821 | Anp32b       | acidic (leucine-rich) nuclear phosphoprotein 32 family, member B | 37.80749 | 41.27539 | 43.76968 | 41.68539 | 46.02577 | 34.34314 |
| 17400449 | Anp32e       | acidic (leucine-rich) nuclear phosphoprotein 32 family, member E | 14.68142 | 12.70936 | 14.62009 | 14.06025 | 14.14814 | 13.38634 |
| 17231431 | Armt1        | acidic residue methyltransferase 1                               | 13.47301 | 11.96219 | 11.46361 | 13.31518 | 10.48228 | 10.96178 |
| 17314855 | Asic1        | acid-sensing (proton-gated) ion channel 1                        | 4.456342 | 5.34815  | 5.055662 | 5.103971 | 4.978634 | 4.978634 |
| 17266732 | Asic2        | acid-sensing (proton-gated) ion channel 2                        | 3.731977 | 5.102343 | 3.911956 | 4.585344 | 3.856361 | 3.721618 |
| 17435335 | Asic3        | acid-sensing (proton-gated) ion channel 3                        | 6.686633 | 8.492092 | 7.187749 | 6.171709 | 5.942912 | 6.171709 |
| 17214564 | Asic4        | acid-sensing (proton-gated) ion channel family member 4          | 11.24366 | 10.87626 | 11.19048 | 9.394589 | 10.3912  | 10.3912  |
| 17398441 | Asic5        | acid-sensing (proton-gated) ion channel family member 5          | 14.79564 | 15.07588 | 13.20672 | 14.8176  | 14.32149 | 14.69996 |
| 17274649 | Adi1         | acireductone dioxygenase 1                                       | 84.7364  | 91.00602 | 80.24002 | 83.61617 | 81.36125 | 78.35047 |
| 17412730 | Aco1         | aconitase 1                                                      | 307.7127 | 284.0321 | 280.2771 | 284.9964 | 263.8474 | 261.361  |
| 17313394 | Aco2         | aconitase 2, mitochondrial                                       | 211.7444 | 266.2892 | 314.948  | 287.327  | 214.4846 | 279.9373 |
| 17314222 | Acr          | acrosin prepropeptide                                            | 6.613711 | 7.158364 | 7.398896 | 7.176299 | 6.819425 | 7.331915 |
| 17515998 | Acrv1        | acrosomal vesicle protein 1                                      | 3.201615 | 2.8896   | 3.163146 | 2.878725 | 2.957196 | 3.310112 |
| 17354831 | Ablim3       | actin binding LIM protein family, member 3                       | 32.5404  | 39.10524 | 38.49155 | 51.32323 | 39.46905 | 36.09958 |
| 17436907 | Afap1        | actin filament associated protein 1                              | 16.96877 | 15.50434 | 16.10269 | 15.48436 | 15.39127 | 15.95725 |
| 17354810 | Afap1l1      | actin filament associated protein 1-like 1                       | 17.92846 | 15.40151 | 18.12778 | 22.59403 | 18.54386 | 16.54232 |
| 17365883 | Afap1l2      | actin filament associated protein 1-like 2                       | 8.663812 | 7.024473 | 5.756891 | 5.30249  | 6.000114 | 5.855815 |
| 17444593 | Arpc1a       | actin related protein 2/3 complex, subunit 1A                    | 84.60963 | 72.82389 | 73.77141 | 71.07646 | 73.92498 | 77.1471  |
| 17444609 | Arpc1b       | actin related protein 2/3 complex, subunit 1B                    | 5.747601 | 8.67612  | 6.584619 | 5.419689 | 5.395176 | 6.32445  |
| 17214149 | Arpc2        | actin related protein 2/3 complex, subunit 2                     | 484.358  | 489.21   | 450.7207 | 426.5526 | 448.2159 | 419.1259 |
| 17442096 | Arpc3        | actin related protein 2/3 complex, subunit 3                     | 91.06722 | 116.3131 | 101.2944 | 96.8265  | 105.6757 | 113.9305 |
| 17461638 | Arpc4        | actin related protein 2/3 complex, subunit 4                     | 111.2946 | 107.7915 | 106.8276 | 112.8905 | 127.49   | 111.2946 |
| 17218254 | Arpc5        | actin related protein 2/3 complex, subunit 5                     | 69.44168 | 87.4587  | 77.24716 | 86.14708 | 80.17052 | 78.99229 |
| 17370511 | Arpc5l       | actin related protein 2/3 complex, subunit 5-like                | 34.87666 | 30.12084 | 30.44197 | 30.39474 | 31.02609 | 32.83949 |
| 17404515 | Actrt3       | actin related protein T3                                         | 8.845661 | 8.276782 | 7.954162 | 9.073505 | 9.675727 | 8.845661 |
| 17513995 | Acta1        | actin, alpha 1, skeletal muscle                                  | 24.90459 | 23.17681 | 21.01678 | 20.79623 | 21.69168 | 26.84274 |
| 17364098 | Acta2        | actin, alpha 2, smooth muscle, aorta                             | 36.30711 | 36.74434 | 36.95916 | 44.55977 | 23.78846 | 32.10509 |
| 17389510 | Actc1        | actin, alpha, cardiac muscle 1                                   | 4.460731 | 3.121826 | 3.418942 | 4.155004 | 3.936545 | 4.164317 |
| 17454753 | Actb         | actin, beta                                                      | 463.6557 | 465.6332 | 440.2777 | 444.3738 | 412.846  | 385.9072 |
| 17289813 | Actbl2       | actin, beta-like 2                                               | 6.168672 | 4.084671 | 4.719618 | 4.39432  | 4.146632 | 5.203997 |
| 17468183 | Actg1        | actin, gamma 2, smooth muscle, enteric                           | 13.1346  | 11.07473 | 10.14601 | 10.27602 | 12.74836 | 12.42333 |
| 17273061 | Actg1        | actin, gamma, cytoplasmic 1                                      | 24.82772 | 15.10129 | 13.88938 | 18.49649 | 19.62866 | 16.56114 |
| 17500992 | Actg-ps1     | actin, gamma, pseudogene 1 [Source:MGI Symbol;Acc:MGI:87907]     | 79.79464 | 73.61817 | 102.2495 | 74.59464 | 70.87869 | 62.87001 |
| 17365911 | Ablim1       | actin-binding LIM protein 1                                      | 13.72715 | 17.52813 | 18.49649 | 19.79192 | 15.55558 | 16.1586  |
| 17436877 | Ablim2       | actin-binding LIM protein 2                                      | 12.72461 | 16.85635 | 11.38632 | 10.133   | 7.391463 | 11.78582 |
| 17316775 | Abra         | actin-binding Rho activating protein                             | 4.975288 | 3.827839 | 3.194699 | 3.485873 | 3.382406 | 3.588249 |
| 17290603 | Actn2        | actinin alpha 2                                                  | 4.29852  | 2.76995  | 2.611104 | 2.807313 | 2.835219 | 3.195651 |
| 17361362 | Actn3        | actinin alpha 3                                                  | 7.153652 | 6.84718  | 7.073479 | 7.208654 | 6.773117 | 7.869817 |
| 17488565 | Actn4        | actinin alpha 4                                                  | 168.1622 | 148.3951 | 157.3693 | 147.7782 | 142.881  | 134.5595 |
| 17282226 | Actn1        | actinin, alpha 1                                                 | 71.4925  | 87.36963 | 100.098  | 68.80827 | 65.29316 | 67.04324 |
| 17485376 | LOC102636989 | actin-like                                                       | 5.329795 | 6.281243 | 6.259121 | 4.780296 | 5.551086 | 4.227398 |
| 17416160 | LOC102642973 | actin-like                                                       | 553.9876 | 481.3392 | 599.7594 | 453.0291 | 446.0835 | 413.2096 |
| 17378238 | Actl10       | actin-like 10                                                    | 6.223042 | 6.143837 | 6.268716 | 5.974633 | 6.223042 | 7.566048 |
| 17521507 | Actl11       | actin-like 11                                                    | 3.399235 | 4.080172 | 3.399235 | 2.606909 | 2.782767 | 3.084657 |
| 17396733 | Actl6a       | actin-like 6A                                                    | 40.46857 | 27.53663 | 30.70773 | 32.5948  | 37.52812 | 30.15029 |
| 17443596 | Actl6b       | actin-like 6B                                                    | 4.064252 | 4.296673 | 3.944931 | 4.534269 | 4.227955 | 4.870669 |
| 17414327 | Actl7a       | actin-like 7a                                                    | 7.413013 | 11.71951 | 9.011267 | 8.51685  | 6.735476 | 9.387624 |
| 17425421 | Actl7b       | actin-like 7b                                                    | 2.284962 | 2.599601 | 2.447824 | 2.480412 | 2.616521 | 2.464919 |
| 17336082 | Actl9        | actin-like 9                                                     | 3.681312 | 3.530053 | 3.492645 | 4.457145 | 3.233709 | 3.571921 |
| 17492466 | Arpin        | actin-related protein 2/3 complex inhibitor                      | 20.75806 | 27.59414 | 28.40317 | 28.29451 | 23.81156 | 22.60578 |
| 17534493 | Actrt1       | actin-related protein T1                                         | 4.436432 | 3.234965 | 3.891941 | 3.430955 | 3.720045 | 3.898935 |
| 17433661 | Actrt2       | actin-related protein T2                                         | 5.031679 | 4.464628 | 4.697262 | 4.518175 | 4.386682 | 5.11651  |
| 17330918 | Alcam        | activated leukocyte cell adhesion molecule                       | 64.4331  | 61.40865 | 51.54784 | 44.08757 | 69.76928 | 65.4985  |
| 17233600 | Ascc1        | activating signal cointegrator 1 complex subunit 1               | 15.21687 | 19.22205 | 20.37842 | 19.02929 | 26.8988  | 19.28758 |
| 17246825 | Ascc2        | activating signal cointegrator 1 complex subunit 2               | 36.84278 | 38.11429 | 34.28819 | 36.07056 | 30.62016 | 33.84381 |
| 17233149 | Ascc3        | activating signal cointegrator 1 complex subunit 3               | 101.392  | 73.35178 | 72.58553 | 75.84278 | 78.57617 | 71.43999 |
| 17314972 | Atf1         | activating transcription factor 1                                | 13.85524 | 18.02453 | 17.84243 | 16.88277 | 16.69241 | 13.81267 |
| 17386591 | Atf2         | activating transcription factor 2                                | 51.44967 | 46.8946  | 45.77253 | 53.48936 | 41.47787 | 50.24019 |
| 17231033 | Atf3         | activating transcription factor 3                                | 20.18903 | 31.56601 | 37.56429 | 21.43966 | 14.00083 | 13.56757 |
| 17313100 | Atf4         | activating transcription factor 4                                | 81.17649 | 73.26539 | 71.92692 | 55.56945 | 64.10967 | 50.3933  |
| 17490391 | Atf5         | activating transcription factor 5                                | 264.2501 | 280.4753 | 319.6856 | 250.669  | 293.694  | 237.2181 |
| 17229556 | Atf6         | activating transcription factor 6                                | 180.2443 | 171.0519 | 189.3472 | 136.6688 | 161.9697 | 134.934  |
| 17336660 | Atf6b        | activating transcription factor 6 beta                           | 30.31479 | 33.82223 | 32.81424 | 30.06139 | 27.39878 | 21.1615  |
| 17322261 | Atf7         | activating transcription factor 7                                | 21.42703 | 40.43661 | 43.71874 | 31.73296 | 39.17361 | 35.00114 |
| 17322263 | Atf7         | activating transcription factor 7                                | 39.35186 | 40.85979 | 42.02861 | 36.54723 | 41.60428 | 40.96103 |
| 17463812 | Atf7ip       | activating transcription factor 7 interacting protein            | 71.25849 | 65.87321 | 93.58919 | 74.74577 | 74.72453 | 70.49456 |
| 17463829 | Atf7ip       | activating transcription factor 7 interacting protein            | 19.42873 | 15.59563 | 18.90283 | 22.29456 | 17.71501 | 17.77367 |
| 17322806 | Atf7ip2      | activating transcription factor 7 interacting protein 2          | 2.872586 | 2.67402  | 2.380393 | 2.545043 | 2.67402  | 2.654739 |

|          |          |                                                                                  |          |          |          |          |          |          |
|----------|----------|----------------------------------------------------------------------------------|----------|----------|----------|----------|----------|----------|
| 17462676 | Aicda    | activation-induced cytidine deaminase                                            | 3.642174 | 3.292903 | 3.351693 | 3.142908 | 2.841928 | 3.158085 |
| 17291131 | Abt1     | activator of basal transcription 1                                               | 23.10223 | 26.2408  | 26.2408  | 24.29454 | 28.12088 | 25.58223 |
| 17440728 | Aym1     | activator of yeast meiotic promoters 1                                           | 12.64916 | 11.84216 | 17.93518 | 24.29454 | 13.06948 | 19.80702 |
| 17266107 | Abr      | active BCR-related gene                                                          | 11.63428 | 16.95231 | 15.22531 | 11.36527 | 10.36494 | 10.80637 |
| 17385437 | Acvr1    | activin A receptor, type 1                                                       | 32.14829 | 24.25516 | 26.14748 | 23.95027 | 19.70883 | 26.19755 |
| 17315152 | Acvr1b   | activin A receptor, type 1B                                                      | 19.49889 | 18.35982 | 21.01649 | 29.22781 | 26.53749 | 19.94949 |
| 17385422 | Acvr1c   | activin A receptor, type 1C                                                      | 3.263862 | 3.913285 | 3.419227 | 3.703322 | 3.263862 | 3.339703 |
| 17315153 | Acvr1i   | activin A receptor, type II-like 1                                               | 10.36156 | 10.60527 | 12.64171 | 10.60527 | 9.648469 | 10.23721 |
| 17370598 | Acvr2a   | activin receptor IIA                                                             | 65.72225 | 61.07034 | 52.56388 | 54.01919 | 59.73274 | 61.57915 |
| 17523081 | Acvr2b   | activin receptor IIB                                                             | 13.68297 | 20.21802 | 13.60099 | 11.91313 | 12.24431 | 12.71236 |
| 17317983 | Arc      | activity regulated cytoskeletal-associated protein                               | 16.52238 | 18.88227 | 17.97251 | 20.63698 | 15.91836 | 18.47638 |
| 17394774 | Adnp     | activity-dependent neuroprotective protein                                       | 50.98426 | 55.28208 | 57.89633 | 57.69762 | 38.92756 | 52.6182  |
| 17527271 | Acsbg1   | acyl-CoA synthetase bubblegum family member 1                                    | 6.313631 | 6.393429 | 6.993962 | 7.133005 | 6.724234 | 7.506654 |
| 17346369 | Acsbg2   | acyl-CoA synthetase bubblegum family member 2                                    | 4.623675 | 5.037088 | 5.230867 | 4.988444 | 5.937024 | 6.936029 |
| 17268010 | Acsf2    | acyl-CoA synthetase family member 2                                              | 384.8147 | 427.9149 | 413.5965 | 414.5378 | 269.9971 | 287.7137 |
| 17506443 | Acsf3    | acyl-CoA synthetase family member 3                                              | 50.41461 | 51.86035 | 60.406   | 56.75517 | 44.92697 | 55.04692 |
| 17500996 | Acs11    | acyl-CoA synthetase long-chain family member 1                                   | 1645.42  | 1590.219 | 1384.51  | 1614.118 | 1141.797 | 1273.594 |
| 17545051 | Acs14    | acyl-CoA synthetase long-chain family member 4                                   | 109.7959 | 104.6276 | 127.0515 | 91.45816 | 119.7474 | 94.35912 |
| 17360462 | Acs15    | acyl-CoA synthetase long-chain family member 5                                   | 440.8885 | 407.6141 | 412.1741 | 357.7232 | 394.0705 | 449.0711 |
| 17249640 | Acs16    | acyl-CoA synthetase long-chain family member 6                                   | 7.66566  | 8.288379 | 8.037351 | 7.891229 | 7.45506  | 8.885235 |
| 17482272 | Acsm1    | acyl-CoA synthetase medium-chain family member 1                                 | 240.6162 | 247.7257 | 212.8274 | 243.9768 | 247.7257 | 210.7473 |
| 17482247 | Acsm2    | acyl-CoA synthetase medium-chain family member 2                                 | 4.395691 | 4.128392 | 4.887376 | 4.069524 | 4.232999 | 4.131999 |
| 17482310 | Acsm3    | acyl-CoA synthetase medium-chain family member 3                                 | 248.8979 | 232.4538 | 220.6598 | 262.9728 | 258.968  | 278.0499 |
| 17482290 | Acsm4    | acyl-CoA synthetase medium-chain family member 4                                 | 4.218646 | 3.989395 | 3.900097 | 4.218646 | 4.662068 | 4.819956 |
| 17482230 | Acsm5    | acyl-CoA synthetase medium-chain family member 5                                 | 138.168  | 173.8115 | 151.252  | 163.9452 | 172.238  | 150.023  |
| 17392690 | Acss1    | acyl-CoA synthetase short-chain family member 1                                  | 8.240032 | 10.05897 | 9.128261 | 7.915717 | 7.147605 | 7.362471 |
| 17378359 | Acss2    | acyl-CoA synthetase short-chain family member 2                                  | 107.1182 | 96.76745 | 92.49414 | 114.9609 | 105.7145 | 107.5043 |
| 17393283 | Acss2os  | acyl-CoA synthetase short-chain family member 2, opposite strand                 | 4.01461  | 3.896611 | 4.20927  | 5.551625 | 3.657404 | 4.885005 |
| 17244705 | Acss3    | acyl-CoA synthetase short-chain family member 3                                  | 76.71251 | 89.49592 | 104.8251 | 96.80301 | 57.84499 | 105.5769 |
| 17277140 | Acot1    | acyl-CoA thioesterase 1                                                          | 46.16124 | 111.6144 | 131.9301 | 74.14204 | 45.87448 | 48.0955  |
| 17316153 | Acot10   | acyl-CoA thioesterase 10                                                         | 9.714165 | 12.97821 | 9.388274 | 10.41665 | 9.991145 | 8.487678 |
| 17427860 | Acot11   | acyl-CoA thioesterase 11                                                         | 13.0305  | 14.46596 | 12.83356 | 12.83312 | 10.52618 | 11.83026 |
| 17289061 | Acot12   | acyl-CoA thioesterase 12                                                         | 322.1503 | 365.5285 | 347.4063 | 343.4271 | 329.1041 | 333.7722 |
| 17291355 | Acot13   | acyl-CoA thioesterase 13                                                         | 110.703  | 116.6821 | 124.2249 | 113.4403 | 116.8691 | 137.8896 |
| 17277134 | Acot2    | acyl-CoA thioesterase 2                                                          | 395.8829 | 751.3597 | 1155.851 | 383.5099 | 194.7285 | 208.5024 |
| 17277152 | Acot3    | acyl-CoA thioesterase 3                                                          | 16.65034 | 30.9492  | 64.4742  | 29.31831 | 28.85961 | 19.19276 |
| 17277146 | Acot4    | acyl-CoA thioesterase 4                                                          | 21.02553 | 40.06665 | 39.79816 | 30.48273 | 24.00645 | 25.07087 |
| 17277161 | Acot5    | acyl-CoA thioesterase 5                                                          | 3.648719 | 3.648719 | 3.565341 | 3.854036 | 3.929811 | 4.468281 |
| 17277170 | Acot6    | acyl-CoA thioesterase 6                                                          | 7.723421 | 10.46231 | 9.518538 | 10.08536 | 9.733172 | 9.179783 |
| 17422117 | Acot7    | acyl-CoA thioesterase 7                                                          | 24.20243 | 21.8621  | 27.6261  | 23.03427 | 21.83469 | 27.53281 |
| 17394275 | Acot8    | acyl-CoA thioesterase 8                                                          | 49.36101 | 42.63097 | 39.90009 | 40.11139 | 30.03869 | 37.22345 |
| 17539064 | Acot9    | acyl-CoA thioesterase 9                                                          | 8.004382 | 9.301543 | 15.10548 | 9.488237 | 9.488237 | 9.535377 |
| 17536538 | Awat1    | acyl-CoA wax alcohol acyltransferase 1                                           | 4.335024 | 3.152353 | 3.428268 | 3.138489 | 4.002052 | 4.117675 |
| 17543460 | Awat2    | acyl-CoA wax alcohol acyltransferase 2                                           | 4.393833 | 4.488365 | 3.775375 | 4.529871 | 5.621792 | 4.563498 |
| 17425211 | Acnat1   | acyl-coenzyme A amino acid N-acyltransferase 1                                   | 65.87184 | 70.4052  | 77.28733 | 84.18376 | 81.60581 | 65.3629  |
| 17425202 | Acnat2   | acyl-coenzyme A amino acid N-acyltransferase 2                                   | 48.27586 | 66.18214 | 86.85217 | 81.68674 | 86.35154 | 59.21579 |
| 17220166 | Acbd3    | acyl-Coenzyme A binding domain containing 3                                      | 72.07915 | 70.61095 | 58.10659 | 52.68973 | 59.20676 | 53.9436  |
| 17257067 | Acbd4    | acyl-Coenzyme A binding domain containing 4                                      | 17.65102 | 23.94363 | 26.38397 | 23.97485 | 23.25244 | 21.84089 |
| 17367576 | Acbd5    | acyl-Coenzyme A binding domain containing 5                                      | 390.5626 | 351.6948 | 302.0346 | 332.2326 | 310.5475 | 389.9053 |
| 17218377 | Acbd6    | acyl-Coenzyme A binding domain containing 6                                      | 25.66855 | 18.76068 | 24.19539 | 22.07069 | 32.65744 | 21.96828 |
| 17366393 | Acbd7    | acyl-Coenzyme A binding domain containing 7                                      | 3.858473 | 3.901503 | 5.043656 | 4.33163  | 4.039593 | 4.228688 |
| 17452264 | Acad10   | acyl-Coenzyme A dehydrogenase family, member 10                                  | 29.71542 | 29.55827 | 43.27524 | 33.31823 | 33.47008 | 35.90294 |
| 17521014 | Acad11   | acyl-Coenzyme A dehydrogenase family, member 11                                  | 520.5634 | 536.6955 | 516.8959 | 491.2147 | 382.5117 | 428.0751 |
| 17452248 | Acad12   | acyl-Coenzyme A dehydrogenase family, member 12                                  | 10.88251 | 11.14829 | 11.19079 | 11.1804  | 8.826858 | 10.93863 |
| 17525163 | Acad8    | acyl-Coenzyme A dehydrogenase family, member 8                                   | 86.49651 | 83.58082 | 85.04179 | 93.96034 | 74.59722 | 80.92031 |
| 17396941 | Acad9    | acyl-Coenzyme A dehydrogenase family, member 9                                   | 49.65544 | 53.50456 | 46.38286 | 55.54403 | 39.81555 | 46.25059 |
| 17223903 | Acadl    | acyl-Coenzyme A dehydrogenase, long-chain                                        | 617.3479 | 750.7611 | 779.962  | 650.3714 | 614.8156 | 698.3275 |
| 17411323 | Acadm    | acyl-Coenzyme A dehydrogenase, medium chain                                      | 1215.648 | 1420.93  | 1303.993 | 1219.962 | 1007.427 | 1141.314 |
| 17451649 | Acads    | acyl-Coenzyme A dehydrogenase, short chain                                       | 292.2785 | 287.8932 | 280.8566 | 265.4433 | 240.2845 | 245.3011 |
| 17484014 | Acadsb   | acyl-Coenzyme A dehydrogenase, short/branched chain                              | 145.0393 | 123.336  | 95.38298 | 122.1754 | 107.6467 | 109.3591 |
| 17265129 | Acadvl   | acyl-Coenzyme A dehydrogenase, very long chain                                   | 389.6568 | 389.5352 | 372.2944 | 369.733  | 353.2021 | 329.435  |
| 17272241 | Acox1    | acyl-Coenzyme A oxidase 1, palmitoyl                                             | 2033.642 | 2233.066 | 2345.972 | 2006.576 | 1738.359 | 1802.383 |
| 17303412 | Acox2    | acyl-Coenzyme A oxidase 2, branched chain                                        | 271.5455 | 290.5857 | 245.245  | 299.6947 | 277.6243 | 290.6099 |
| 17436839 | Acox3    | acyl-Coenzyme A oxidase 3, pristanoyl                                            | 37.0759  | 32.8131  | 34.42751 | 36.08982 | 31.22739 | 25.65663 |
| 17375935 | Acox1    | acyl-Coenzyme A oxidase-like                                                     | 5.114311 | 6.171709 | 6.059589 | 6.171709 | 5.564299 | 5.091497 |
| 17457555 | Agk      | acylglycerol kinase                                                              | 14.55568 | 17.16526 | 20.36303 | 15.61705 | 20.33101 | 17.16526 |
| 17285586 | Aoah     | acyloxyacyl hydrolase                                                            | 5.541897 | 5.844785 | 6.443301 | 6.595491 | 4.285222 | 5.56106  |
| 17531130 | Apeh     | acylpeptide hydrolase                                                            | 56.20085 | 58.02771 | 52.16608 | 56.53726 | 47.67265 | 52.4998  |
| 17282689 | Acyp1    | acylphosphatase 1, erythrocyte (common) type                                     | 22.10468 | 22.38143 | 25.22636 | 23.8005  | 24.19874 | 20.68123 |
| 17261393 | Acyp2    | acylphosphatase 2, muscle type                                                   | 10.81176 | 8.107966 | 7.155834 | 6.661606 | 5.227967 | 8.426071 |
| 17308083 | Adamdec1 | ADAM-like, decysin 1                                                             | 9.900834 | 10.36652 | 11.1367  | 7.837698 | 10.43523 | 12.44031 |
| 17415130 | Adamts1  | ADAMTS-like 1                                                                    | 4.430716 | 4.738564 | 4.276676 | 3.867845 | 4.809144 | 3.341834 |
| 17415136 | Adamts11 | ADAMTS-like 1                                                                    | 5.780603 | 6.121563 | 5.703154 | 7.093364 | 5.465904 | 5.780603 |
| 17368476 | Adamts12 | ADAMTS-like 2                                                                    | 17.46579 | 23.00093 | 20.93057 | 22.16129 | 18.88973 | 22.46878 |
| 17479769 | Adamts13 | ADAMTS-like 3                                                                    | 4.884023 | 5.51993  | 5.985742 | 5.51993  | 5.728312 | 6.680842 |
| 17407829 | Adamts14 | ADAMTS-like 4                                                                    | 12.59571 | 13.60599 | 14.48502 | 9.691299 | 12.22905 | 13.91366 |
| 17242879 | Adamts15 | ADAMTS-like 5                                                                    | 10.8887  | 11.59684 | 13.85899 | 10.50016 | 9.804065 | 7.990856 |
| 17246904 | Ap1b1    | adaptor protein complex AP-1, beta 1 subunit                                     | 78.69227 | 67.45718 | 79.49874 | 83.14629 | 62.2961  | 71.80289 |
| 17505426 | Ap1g1    | adaptor protein complex AP-1, gamma 1 subunit                                    | 153.8947 | 148.5227 | 139.1889 | 133.2027 | 128.7626 | 113.9455 |
| 17306638 | Ap1g2    | adaptor protein complex AP-1, gamma 2 subunit                                    | 13.524   | 12.10549 | 15.73342 | 11.1571  | 13.07628 | 11.24366 |
| 17524703 | Ap1m2    | adaptor protein complex AP-1, mu 2 subunit                                       | 4.566377 | 4.566377 | 5.49306  | 4.79779  | 4.480905 | 4.692771 |
| 17453809 | Ap1s1    | adaptor protein complex AP-1, sigma 1                                            | 30.34864 | 28.35596 | 32.12223 | 22.93295 | 25.0148  | 30.38569 |
| 17304246 | App1     | adaptor protein, phosphotyrosine interaction, PH domain and leucine zipper cont: | 49.01665 | 41.33638 | 41.37708 | 48.56214 | 47.56637 | 45.40408 |
| 17243576 | App12    | adaptor protein, phosphotyrosine interaction, PH domain and leucine zipper cont: | 25.98649 | 30.90161 | 32.44423 | 27.3021  | 30.02787 | 33.6077  |

|          |           |                                                                                |          |          |          |          |          |          |
|----------|-----------|--------------------------------------------------------------------------------|----------|----------|----------|----------|----------|----------|
| 17376466 | Ap5s1     | adaptor-related protein 5 complex, sigma 1 subunit                             | 29.05008 | 28.49032 | 29.67919 | 28.11913 | 30.66795 | 28.51462 |
| 17410227 | Ap1ar     | adaptor-related protein complex 1 associated regulatory protein                | 97.21587 | 106.0308 | 123.3428 | 94.97132 | 88.78475 | 94.14157 |
| 17539467 | Ap1s2     | adaptor-related protein complex 1, sigma 2 subunit                             | 3.842912 | 4.178224 | 3.842912 | 4.20927  | 3.842912 | 3.37765  |
| 17490452 | Ap2a1     | adaptor-related protein complex 2, alpha 1 subunit                             | 48.8972  | 40.66174 | 54.16954 | 43.31606 | 48.11417 | 44.04114 |
| 17484966 | Ap2a2     | adaptor-related protein complex 2, alpha 2 subunit                             | 212.6829 | 177.567  | 169.027  | 180.5194 | 172.83   | 165.7322 |
| 17254210 | Ap2b1     | adaptor-related protein complex 2, beta 1 subunit                              | 78.15358 | 79.66312 | 81.70713 | 78.85444 | 77.67724 | 77.44982 |
| 17323929 | Ap2m1     | adaptor-related protein complex 2, mu 1 subunit                                | 227.2159 | 248.8789 | 265.9387 | 223.0711 | 218.4107 | 207.6817 |
| 17474136 | Ap2s1     | adaptor-related protein complex 2, sigma 1 subunit                             | 86.43657 | 104.1161 | 111.3942 | 105.5652 | 110.1038 | 116.4026 |
| 17289207 | Ap3b1     | adaptor-related protein complex 3, beta 1 subunit                              | 106.2626 | 116.6967 | 116.6967 | 110.5021 | 116.6967 | 112.9453 |
| 17492772 | Ap3b2     | adaptor-related protein complex 3, beta 2 subunit                              | 5.310214 | 5.792194 | 5.918411 | 4.894156 | 5.027113 | 4.981154 |
| 17243057 | Ap3d1     | adaptor-related protein complex 3, delta 1 subunit                             | 149.388  | 151.1985 | 186.9463 | 131.7665 | 130.0498 | 122.0882 |
| 17303941 | Ap3m1     | adaptor-related protein complex 3, mu 1 subunit                                | 92.80946 | 128.1625 | 101.0083 | 125.0378 | 107.8214 | 149.2017 |
| 17508111 | Ap3m2     | adaptor-related protein complex 3, mu 2 subunit                                | 12.67927 | 12.34641 | 11.54135 | 12.99919 | 14.37002 | 12.99919 |
| 17350369 | Ap3s1     | adaptor-related protein complex 3, sigma 1 subunit                             | 9.487842 | 6.124788 | 5.093898 | 6.835088 | 7.515348 | 6.790275 |
| 17504019 | Ap3s1-ps2 | adaptor-related protein complex 3, sigma 1 subunit, pseudogene 2 [Source:MGI S | 21.83151 | 18.11898 | 10.14826 | 13.78436 | 5.120306 | 18.90021 |
| 17492457 | Ap3s2     | adaptor-related protein complex 3, sigma 2 subunit                             | 32.84359 | 36.1231  | 33.3187  | 37.45717 | 39.30961 | 31.00631 |
| 17356477 | Ap5b1     | adaptor-related protein complex 5, beta 1 subunit                              | 12.7322  | 13.92196 | 13.39423 | 14.90051 | 14.65184 | 17.86978 |
| 17299454 | Ap5m1     | adaptor-related protein complex 5, mu 1 subunit                                | 32.34005 | 32.69436 | 28.37051 | 27.94678 | 30.39917 | 27.47181 |
| 17444216 | Ap5z1     | adaptor-related protein complex 5, zeta 1 subunit                              | 29.35796 | 23.41531 | 24.67127 | 18.23768 | 22.0525  | 24.98603 |
| 17502423 | Ap1m1     | adaptor-related protein complex AP-1, mu subunit 1                             | 47.51134 | 49.16501 | 59.20881 | 53.13977 | 47.22045 | 60.56364 |
| 17224738 | Ap1s3     | adaptor-related protein complex AP-1, sigma 3                                  | 5.193006 | 6.078941 | 5.617429 | 5.617429 | 4.986543 | 6.182241 |
| 17401246 | Ap4b1     | adaptor-related protein complex AP-4, beta 1                                   | 50.37269 | 38.80122 | 46.95738 | 45.33615 | 42.17248 | 48.96945 |
| 17375742 | Ap4e1     | adaptor-related protein complex AP-4, epsilon 1                                | 9.880883 | 11.92089 | 12.107   | 11.93412 | 10.79896 | 11.83986 |
| 17443766 | Ap4m1     | adaptor-related protein complex AP-4, mu 1                                     | 27.22254 | 29.63335 | 26.71948 | 24.38311 | 32.42962 | 27.83889 |
| 17275392 | Ap4s1     | adaptor-related protein complex AP-4, sigma 1                                  | 8.764428 | 9.248568 | 9.491657 | 7.981998 | 9.689351 | 11.96775 |
| 17377940 | Asxl1     | additional sex combs like 1                                                    | 15.62095 | 21.09487 | 25.55281 | 21.29481 | 19.06494 | 19.93332 |
| 17273604 | Asxl2     | additional sex combs like 2 (Drosophila)                                       | 27.79378 | 37.31749 | 38.00665 | 39.15949 | 37.04944 | 38.41772 |
| 17348879 | Asxl3     | additional sex combs like 3 (Drosophila)                                       | 5.366532 | 5.495421 | 5.014758 | 5.269149 | 5.411881 | 4.72289  |
| 17436629 | Add1      | adducin 1 (alpha)                                                              | 47.00949 | 45.03735 | 47.81562 | 41.91777 | 50.82795 | 42.86802 |
| 17460366 | Add2      | adducin 2 (beta)                                                               | 8.630595 | 8.634365 | 7.514984 | 8.594359 | 8.066708 | 8.420524 |
| 17360312 | Add3      | adducin 3 (gamma)                                                              | 45.04297 | 37.06254 | 46.64401 | 33.45291 | 36.94712 | 34.00064 |
| 17513771 | Aprt      | adenine phosphoribosyl transferase                                             | 50.42265 | 70.05665 | 71.06809 | 79.21545 | 59.53557 | 60.83206 |
| 17349369 | Apc       | adenomatosis polyposis coli                                                    | 37.47275 | 36.09782 | 39.13425 | 32.40692 | 39.33604 | 38.50356 |
| 17235300 | Apc2      | adenomatosis polyposis coli 2                                                  | 12.13742 | 11.88508 | 11.37899 | 11.10371 | 10.4471  | 9.931076 |
| 17351196 | Apcdd1    | adenomatosis polyposis coli down-regulated 1                                   | 8.027663 | 8.299359 | 8.994543 | 11.14489 | 8.984075 | 6.582657 |
| 17227094 | Adora1    | adenosine A1 receptor                                                          | 48.50159 | 70.98243 | 77.21397 | 59.91644 | 56.92143 | 66.61245 |
| 17234339 | Adora2a   | adenosine A2a receptor                                                         | 12.13187 | 16.88933 | 9.758978 | 9.488237 | 9.96438  | 10.74736 |
| 17250660 | Adora2b   | adenosine A2b receptor                                                         | 11.95051 | 15.27987 | 14.42851 | 20.49486 | 14.7941  | 15.28262 |
| 17394063 | Ada       | adenosine deaminase                                                            | 8.919853 | 8.339321 | 9.035973 | 8.471515 | 7.844981 | 9.294131 |
| 17397091 | Adad1     | adenosine deaminase domain containing 1 (testis specific)                      | 2.858959 | 3.053577 | 3.516816 | 3.336487 | 3.868274 | 3.628869 |
| 17506126 | Adad2     | adenosine deaminase domain containing 2                                        | 5.147779 | 6.030928 | 5.991055 | 6.030928 | 6.030928 | 6.158291 |
| 17399496 | Adar      | adenosine deaminase, RNA-specific                                              | 35.61097 | 38.30737 | 38.47955 | 39.07814 | 39.34313 | 38.97832 |
| 17242281 | Adarb1    | adenosine deaminase, RNA-specific, B1                                          | 27.35267 | 24.80708 | 26.40794 | 23.95459 | 22.62899 | 27.92219 |
| 17285036 | Adarb2    | adenosine deaminase, RNA-specific, B2                                          | 3.224689 | 3.300718 | 2.686672 | 3.63136  | 3.482951 | 3.203969 |
| 17513194 | Adat1     | adenosine deaminase, tRNA-specific 1                                           | 5.48933  | 7.055948 | 5.617429 | 5.48933  | 6.295409 | 6.092186 |
| 17231733 | Adat2     | adenosine deaminase, tRNA-specific 2                                           | 16.19829 | 16.84677 | 13.51397 | 19.22671 | 16.84677 | 18.74976 |
| 17235368 | Adat3     | adenosine deaminase, tRNA-specific 3                                           | 26.34103 | 28.19212 | 27.98923 | 22.84901 | 22.00104 | 22.72298 |
| 17375203 | Adal      | adenosine deaminase-like                                                       | 28.58151 | 31.5601  | 25.97137 | 26.36112 | 22.49231 | 28.04672 |
| 17297576 | Adk       | adenosine kinase                                                               | 652.7108 | 654.1193 | 632.9115 | 659.3086 | 649.673  | 695.9983 |
| 17401126 | Ampd1     | adenosine monophosphate deaminase 1                                            | 4.482271 | 4.888731 | 5.2758   | 5.546278 | 4.898228 | 5.650858 |
| 17409184 | Ampd2     | adenosine monophosphate deaminase 2                                            | 35.96945 | 26.74505 | 28.81024 | 27.42786 | 25.47659 | 28.16575 |
| 17481776 | Ampd3     | adenosine monophosphate deaminase 3                                            | 10.48228 | 10.48228 | 10.91031 | 12.75738 | 10.48228 | 9.665605 |
| 17247183 | Adcy1     | adenylate cyclase 1                                                            | 6.287864 | 6.859817 | 5.4899   | 6.960592 | 5.379567 | 6.287864 |
| 17218965 | Adcy10    | adenylate cyclase 10                                                           | 3.214156 | 3.214156 | 3.236625 | 3.351995 | 3.263862 | 3.669873 |
| 17294086 | Adcy2     | adenylate cyclase 2                                                            | 5.874557 | 7.941437 | 6.775183 | 5.790107 | 6.174062 | 7.733492 |
| 17273714 | Adcy3     | adenylate cyclase 3                                                            | 7.580694 | 10.40172 | 8.276209 | 9.824813 | 9.707905 | 9.402341 |
| 17306877 | Adcy4     | adenylate cyclase 4                                                            | 11.57885 | 14.40962 | 22.30863 | 17.188   | 13.50686 | 17.97899 |
| 17325206 | Adcy5     | adenylate cyclase 5                                                            | 7.363134 | 8.766737 | 8.351469 | 7.698994 | 9.399018 | 7.006189 |
| 17321263 | Adcy6     | adenylate cyclase 6                                                            | 21.99098 | 34.46237 | 36.84431 | 28.3827  | 29.18125 | 37.07488 |
| 17503616 | Adcy7     | adenylate cyclase 7                                                            | 9.91079  | 15.09648 | 10.93067 | 8.062292 | 10.99968 | 10.93067 |
| 17317533 | Adcy8     | adenylate cyclase 8                                                            | 3.348906 | 4.538136 | 3.212597 | 3.306603 | 3.182411 | 3.268163 |
| 17327720 | Adcy9     | adenylate cyclase 9                                                            | 50.41636 | 53.65981 | 52.56826 | 50.96306 | 46.47265 | 53.78344 |
| 17340404 | Adcyap1   | adenylate cyclase activating polypeptide 1                                     | 3.501444 | 4.414806 | 4.1753   | 4.330189 | 3.505985 | 4.141375 |
| 17458841 | Adcyap1r1 | adenylate cyclase activating polypeptide 1 receptor 1                          | 10.90245 | 10.54794 | 9.488237 | 8.566762 | 9.933898 | 9.488237 |
| 17369911 | Ak1       | adenylate kinase 1                                                             | 9.315415 | 9.851135 | 9.573723 | 13.45817 | 9.859196 | 12.06294 |
| 17418904 | Ak2       | adenylate kinase 2                                                             | 183.8328 | 206.6277 | 179.0862 | 191.9265 | 166.8583 | 202.6898 |
| 17363779 | Ak3       | adenylate kinase 3                                                             | 514.4368 | 505.0667 | 484.0694 | 525.2644 | 482.612  | 470.5291 |
| 17415932 | Ak4       | adenylate kinase 4                                                             | 94.29308 | 82.01523 | 92.49798 | 81.39171 | 91.72035 | 85.13733 |
| 17411235 | Ak5       | adenylate kinase 5                                                             | 4.747342 | 5.137726 | 4.843601 | 4.722039 | 5.120306 | 5.133455 |
| 17278415 | Ak7       | adenylate kinase 7                                                             | 3.910383 | 3.736429 | 3.958901 | 3.946408 | 3.670305 | 4.364208 |
| 17368741 | Ak8       | adenylate kinase 8                                                             | 12.47977 | 13.54464 | 12.67303 | 12.52501 | 11.64937 | 15.10925 |
| 17232802 | Ak9       | adenylate kinase 9                                                             | 4.729114 | 5.120306 | 4.690039 | 4.873371 | 5.207641 | 5.010727 |
| 17313199 | Adsl      | adenylosuccinate lyase                                                         | 35.26365 | 35.36107 | 34.72902 | 47.08416 | 34.10355 | 36.43189 |
| 17279349 | Adssl1    | adenylosuccinate synthetase like 1                                             | 39.05594 | 45.41415 | 49.5492  | 49.72364 | 36.05731 | 49.39524 |
| 17230256 | Adss      | adenylosuccinate synthetase, non muscle                                        | 122.445  | 115.8296 | 113.5418 | 119.2611 | 115.4577 | 109.6354 |
| 17433528 | Ajap1     | adherens junction associated protein 1                                         | 6.171709 | 4.801649 | 5.075395 | 4.994638 | 3.731459 | 5.495459 |
| 17484409 | Adgra1    | adhesion G protein-coupled receptor A1                                         | 7.944685 | 8.822637 | 8.467112 | 8.467112 | 10.11848 | 9.829922 |
| 17500301 | Adgra2    | adhesion G protein-coupled receptor A2                                         | 18.97424 | 23.26759 | 21.88833 | 23.29067 | 19.09681 | 19.50457 |
| 17447979 | Adgra3    | adhesion G protein-coupled receptor A3                                         | 93.24213 | 70.65697 | 76.04967 | 63.74896 | 56.75911 | 59.24206 |
| 17312146 | Adgrb1    | adhesion G protein-coupled receptor B1                                         | 9.123011 | 7.782103 | 8.799918 | 6.893134 | 7.200365 | 8.64137  |
| 17419097 | Adgrb2    | adhesion G protein-coupled receptor B2                                         | 7.870689 | 9.015578 | 7.611654 | 7.431276 | 8.297806 | 9.967488 |
| 17221878 | Adgrb3    | adhesion G protein-coupled receptor B3                                         | 2.953407 | 2.953407 | 2.790551 | 2.953407 | 2.953407 | 2.897904 |
| 17442834 | Adgrd1    | adhesion G protein-coupled receptor D1                                         | 4.148961 | 5.397981 | 7.234834 | 4.950245 | 4.687244 | 5.94283  |
| 17370471 | Adgrd2-ps | adhesion G protein-coupled receptor D2, pseudogene                             | 6.832909 | 7.86938  | 6.694935 | 7.616721 | 7.449017 | 7.263677 |

|          |              |                                                                                    |          |          |          |          |          |          |
|----------|--------------|------------------------------------------------------------------------------------|----------|----------|----------|----------|----------|----------|
| 17339013 | Adgre1       | adhesion G protein-coupled receptor E1                                             | 43.65878 | 55.09922 | 53.78045 | 45.65117 | 46.52648 | 54.73417 |
| 17338617 | Adgre4       | adhesion G protein-coupled receptor E4                                             | 39.8893  | 49.96098 | 54.04316 | 42.51323 | 45.75032 | 35.12874 |
| 17510948 | Adgre5       | adhesion G protein-coupled receptor E5                                             | 83.37656 | 108.2483 | 154.9609 | 96.42531 | 91.95142 | 81.85564 |
| 17337750 | Adgrf1       | adhesion G protein-coupled receptor F1                                             | 4.509789 | 3.709745 | 3.853769 | 4.639277 | 4.509789 | 5.189156 |
| 17345029 | Adgrf2       | adhesion G protein-coupled receptor F2                                             | 6.128356 | 6.943774 | 6.943774 | 6.943774 | 6.992896 | 6.943774 |
| 17446669 | Adgrf3       | adhesion G protein-coupled receptor F3                                             | 5.585127 | 5.252157 | 7.06701  | 5.00167  | 4.675336 | 4.835181 |
| 17345016 | Adgrf4       | adhesion G protein-coupled receptor F4                                             | 3.102304 | 3.218682 | 3.35874  | 3.316083 | 3.65563  | 3.440647 |
| 17337770 | Adgrf5       | adhesion G protein-coupled receptor F5                                             | 46.28491 | 43.96123 | 58.83774 | 50.39155 | 36.56167 | 44.44749 |
| 17504190 | Adgrg1       | adhesion G protein-coupled receptor G1                                             | 10.64047 | 15.78158 | 22.53038 | 15.26409 | 10.53107 | 9.327432 |
| 17539271 | Adgrg2       | adhesion G protein-coupled receptor G2                                             | 7.131275 | 7.48779  | 8.467112 | 8.466232 | 8.341114 | 7.169189 |
| 17504207 | Adgrg3       | adhesion G protein-coupled receptor G3                                             | 12.78012 | 12.7649  | 17.46785 | 15.55256 | 8.427472 | 13.05047 |
| 17534982 | Adgrg4       | adhesion G protein-coupled receptor G4                                             | 3.007553 | 3.154278 | 2.78323  | 2.407073 | 3.435762 | 3.007553 |
| 17504174 | Adgrg5       | adhesion G protein-coupled receptor G5                                             | 4.579468 | 4.836254 | 5.404009 | 6.541085 | 4.351793 | 5.382849 |
| 17239435 | Adgrg6       | adhesion G protein-coupled receptor G6                                             | 4.970014 | 6.038415 | 5.120306 | 6.943774 | 4.652319 | 3.843578 |
| 17331059 | Adgrg7       | adhesion G protein-coupled receptor G7                                             | 2.685461 | 3.550691 | 2.880921 | 3.347792 | 3.296443 | 2.845259 |
| 17502994 | Adgrl1       | adhesion G protein-coupled receptor L1                                             | 7.001383 | 18.69603 | 11.45813 | 13.82799 | 12.39013 | 12.44885 |
| 17411103 | Adgrl2       | adhesion G protein-coupled receptor L2                                             | 63.11539 | 59.34029 | 62.38641 | 65.76828 | 68.29178 | 51.91178 |
| 17438530 | Adgrl3       | adhesion G protein-coupled receptor L3                                             | 4.211984 | 4.612823 | 3.620277 | 3.263681 | 3.816949 | 3.241946 |
| 17403605 | Adgrl4       | adhesion G protein-coupled receptor L4                                             | 49.85305 | 35.28101 | 45.44627 | 37.09724 | 19.79879 | 23.29454 |
| 17294565 | Adgrv1       | adhesion G protein-coupled receptor V1                                             | 4.220137 | 4.100927 | 4.226138 | 4.326529 | 4.316285 | 4.20927  |
| 17401650 | Amigo1       | adhesion molecule with Ig like domain 1                                            | 13.51585 | 14.56385 | 16.33076 | 13.02399 | 10.25539 | 14.37958 |
| 17320967 | Amigo2       | adhesion molecule with Ig like domain 2                                            | 24.31711 | 23.99696 | 25.94582 | 27.19784 | 26.36112 | 26.36112 |
| 17521621 | Amigo3       | adhesion molecule with Ig like domain 3                                            | 6.909302 | 8.319461 | 7.427568 | 5.988522 | 8.016486 | 7.347228 |
| 17516718 | Amica1       | adhesion molecule, interacts with CXADR antigen 1                                  | 4.728098 | 5.001809 | 5.95487  | 4.237402 | 4.686627 | 5.070015 |
| 17380729 | Adrm1        | adhesion regulating molecule 1                                                     | 42.65994 | 47.55384 | 46.7139  | 39.87824 | 44.57182 | 33.57953 |
| 17407396 | Adrm1        | adhesion regulating molecule 1                                                     | 110.6562 | 114.9442 | 117.4929 | 112.1822 | 112.1822 | 103.0228 |
| 17392676 | Apmap        | adipocyte plasma membrane associated protein                                       | 54.42698 | 56.16658 | 50.79061 | 44.29095 | 54.87054 | 53.71004 |
| 17537865 | Arxes1       | adipocyte-related X-chromosome expressed sequence 1                                | 2.038701 | 2.245863 | 2.459594 | 2.28791  | 2.203321 | 2.875833 |
| 17537861 | Arxes2       | adipocyte-related X-chromosome expressed sequence 2                                | 2.623968 | 3.076863 | 3.569644 | 3.009471 | 2.571428 | 2.773793 |
| 17493436 | Aamdc        | adipogenesis associated Mth938 domain containing                                   | 22.53335 | 21.48667 | 18.03716 | 21.13087 | 22.53335 | 23.9161  |
| 17378898 | Adig         | adipogenesis                                                                       | 3.462322 | 4.064985 | 3.729055 | 4.603177 | 4.265397 | 3.729055 |
| 17217455 | Adipor1      | adiponectin receptor 1                                                             | 137.733  | 128.1554 | 136.3055 | 131.1278 | 129.3997 | 126.194  |
| 17470301 | Adipor2      | adiponectin receptor 2                                                             | 492.483  | 515.3897 | 501.9118 | 535.3876 | 434.7403 | 459.1017 |
| 17324404 | Adipoq       | adiponectin, CIQ and collagen domain containing                                    | 4.830525 | 3.855559 | 4.247577 | 4.528804 | 4.429028 | 4.209474 |
| 17355619 | Adnp2        | ADNP homeobox 2                                                                    | 13.17252 | 12.66215 | 11.95233 | 11.50086 | 8.421108 | 11.77039 |
| 17517934 | Adpgk        | ADP-dependent glucokinase                                                          | 35.87458 | 28.43193 | 26.82061 | 24.61319 | 25.62677 | 24.16672 |
| 17264295 | Adprm        | ADP-ribose/CDP-alcohol diphosphatase, manganese dependent                          | 15.79351 | 14.93857 | 15.45391 | 18.34837 | 17.50651 | 15.60688 |
| 17330373 | Adprh        | ADP-ribosylarginine hydrolase                                                      | 22.62114 | 16.09042 | 17.29784 | 17.23011 | 17.47088 | 15.65292 |
| 17263379 | Arf1         | ADP-ribosylation factor 1                                                          | 133.7495 | 140.2338 | 134.8611 | 148.866  | 131.7683 | 150.4083 |
| 17548910 | LOC102632770 | ADP-ribosylation factor 1 pseudogene                                               | 552.2279 | 501.2755 | 540.7695 | 451.1114 | 497.0027 | 472.893  |
| 17257165 | Arf2         | ADP-ribosylation factor 2                                                          | 8.707147 | 12.46836 | 11.41501 | 15.33302 | 15.535   | 9.682436 |
| 17321326 | Arf3         | ADP-ribosylation factor 3                                                          | 27.66136 | 33.5193  | 26.14857 | 27.46914 | 28.71674 | 23.96455 |
| 17297913 | Arf4         | ADP-ribosylation factor 4                                                          | 210.6202 | 158.047  | 147.1333 | 150.6921 | 164.4961 | 158.9016 |
| 17304235 | Arf4os       | ADP-ribosylation factor 4, opposite strand [Source:MGI Symbol;Acc:MGI:3642411]     | 5.493707 | 5.947486 | 6.501759 | 6.587906 | 6.684826 | 6.31744  |
| 17456485 | Arf5         | ADP-ribosylation factor 5                                                          | 68.42777 | 54.4002  | 58.63296 | 50.93551 | 75.21351 | 66.86874 |
| 17275925 | Arf6         | ADP-ribosylation factor 6                                                          | 80.78301 | 83.64689 | 84.22111 | 81.09101 | 80.89788 | 85.83654 |
| 17380892 | Arfgap1      | ADP-ribosylation factor GTPase activating protein 1                                | 55.35071 | 56.8812  | 47.388   | 54.89603 | 61.63253 | 52.76722 |
| 17373262 | Arfgap2      | ADP-ribosylation factor GTPase activating protein 2                                | 111.784  | 114.7476 | 112.1363 | 115.6723 | 126.062  | 107.4156 |
| 17319806 | Arfgap3      | ADP-ribosylation factor GTPase activating protein 3                                | 48.18626 | 16.65877 | 20.78571 | 20.2639  | 20.28259 | 21.09106 |
| 17221228 | Arfgef1      | ADP-ribosylation factor guanine nucleotide-exchange factor 1(brefeldin A-inhibite  | 211.2621 | 196.0652 | 174.6182 | 186.8556 | 186.6782 | 191.1843 |
| 17379767 | Arfgef2      | ADP-ribosylation factor guanine nucleotide-exchange factor 2 (brefeldin A-inhibite | 126.7885 | 109.3409 | 120.7609 | 116.2349 | 106.4166 | 117.882  |
| 17406383 | Arfip1       | ADP-ribosylation factor interacting protein 1                                      | 60.42694 | 58.7929  | 53.46489 | 51.061   | 58.23522 | 54.84355 |
| 17406395 | Arfip1       | ADP-ribosylation factor interacting protein 1                                      | 2.67402  | 3.723166 | 4.801649 | 4.692608 | 4.352065 | 6.430184 |
| 17494559 | Arfip2       | ADP-ribosylation factor interacting protein 2                                      | 36.62102 | 28.77073 | 29.31099 | 28.84461 | 31.43805 | 37.64718 |
| 17395852 | Arfrp1       | ADP-ribosylation factor related protein 1                                          | 40.74892 | 35.10294 | 40.32856 | 42.39347 | 31.79526 | 39.97788 |
| 17236378 | Arl1         | ADP-ribosylation factor-like 1                                                     | 104.632  | 95.37836 | 82.29712 | 84.39116 | 99.63702 | 87.73618 |
| 17287454 | Arl10        | ADP-ribosylation factor-like 10                                                    | 14.57749 | 13.09769 | 14.93857 | 11.43449 | 9.586472 | 12.00098 |
| 17301108 | Arl11        | ADP-ribosylation factor-like 11                                                    | 11.7615  | 9.996895 | 11.03244 | 14.27303 | 15.09355 | 11.93296 |
| 17537632 | Arl13a       | ADP-ribosylation factor-like 13A                                                   | 6.224034 | 5.65909  | 6.194896 | 5.932458 | 6.709755 | 5.409743 |
| 17331365 | Arl13b       | ADP-ribosylation factor-like 13B                                                   | 12.19992 | 12.51494 | 14.03512 | 14.15235 | 14.31296 | 22.3746  |
| 17398272 | Arl14        | ADP-ribosylation factor-like 14                                                    | 4.725837 | 5.136337 | 5.959784 | 5.209807 | 5.345222 | 4.00866  |
| 17389093 | Arl14ep      | ADP-ribosylation factor-like 14 effector protein                                   | 24.33026 | 22.96126 | 21.54005 | 22.96126 | 20.08421 | 19.73425 |
| 17350401 | Arl14ep1     | ADP-ribosylation factor-like 14 effector protein-like                              | 8.452218 | 9.613755 | 7.984821 | 11.25583 | 9.883623 | 9.579298 |
| 17290033 | Arl15        | ADP-ribosylation factor-like 15                                                    | 48.33479 | 43.3993  | 52.4696  | 44.97402 | 38.64474 | 38.94132 |
| 17273121 | Arl16        | ADP-ribosylation factor-like 16                                                    | 11.24366 | 11.05196 | 12.0363  | 13.35456 | 11.42031 | 11.24366 |
| 17361988 | Arl2         | ADP-ribosylation factor-like 2                                                     | 16.60758 | 17.48675 | 15.8412  | 17.49632 | 17.84799 | 15.05103 |
| 17504112 | Arl2bp       | ADP-ribosylation factor-like 2 binding protein                                     | 18.40658 | 21.33204 | 24.12605 | 19.18571 | 20.35174 | 18.02004 |
| 17365403 | Arl3         | ADP-ribosylation factor-like 3                                                     | 47.40082 | 59.18132 | 59.18132 | 62.67508 | 58.07076 | 59.18132 |
| 17280810 | Arl4a        | ADP-ribosylation factor-like 4A                                                    | 86.7559  | 71.09469 | 73.66973 | 76.5452  | 67.89437 | 80.63253 |
| 17275155 | Arl4aos      | ADP-ribosylation factor-like 4A, opposite strand                                   | 3.527436 | 3.544495 | 3.339703 | 3.762079 | 3.339703 | 3.437763 |
| 17225360 | Arl4c        | ADP-ribosylation factor-like 4C                                                    | 15.68779 | 16.5515  | 18.11647 | 15.98149 | 21.86346 | 18.68113 |
| 17256823 | Arl4d        | ADP-ribosylation factor-like 4D                                                    | 53.20131 | 55.60721 | 55.05283 | 57.82254 | 75.07236 | 76.30523 |
| 17385272 | Arl5a        | ADP-ribosylation factor-like 5A                                                    | 212.3073 | 203.1934 | 229.89   | 199.9395 | 235.4309 | 221.8945 |
| 17367192 | Arl5b        | ADP-ribosylation factor-like 5B                                                    | 77.92531 | 98.37024 | 88.11587 | 79.92029 | 93.455   | 104.3821 |
| 17268681 | Arl5c        | ADP-ribosylation factor-like 5C                                                    | 3.817928 | 4.993184 | 4.529589 | 4.751029 | 5.964578 | 5.247863 |
| 17331311 | Arl6         | ADP-ribosylation factor-like 6                                                     | 7.571295 | 7.870689 | 7.30265  | 8.411599 | 6.63842  | 8.253751 |
| 17495466 | Arl6ip1      | ADP-ribosylation factor-like 6 interacting protein 1                               | 329.5423 | 296.9364 | 277.8958 | 288.3546 | 263.6957 | 316.3044 |
| 17442474 | Arl6ip4      | ADP-ribosylation factor-like 6 interacting protein 4                               | 69.67649 | 66.42802 | 65.95865 | 62.9821  | 65.94037 | 71.80289 |
| 17461124 | Arl6ip5      | ADP-ribosylation factor-like 6 interacting protein 5                               | 60.64429 | 61.1237  | 60.54349 | 57.44502 | 52.06926 | 48.6946  |
| 17370843 | Arl6ip6      | ADP-ribosylation factor-like 6 interacting protein 6                               | 13.66895 | 15.21097 | 15.8277  | 17.7605  | 15.19137 | 17.22008 |
| 17217580 | Arl8a        | ADP-ribosylation factor-like 8A                                                    | 47.22766 | 58.89528 | 43.79275 | 70.55322 | 42.60114 | 61.90011 |
| 17461423 | Arl8b        | ADP-ribosylation factor-like 8B                                                    | 159.5373 | 152.9716 | 139.3404 | 144.9961 | 124.7858 | 135.8528 |
| 17438459 | Arl9         | ADP-ribosylation factor-like 9                                                     | 3.130558 | 3.122497 | 3.152246 | 2.965818 | 3.49606  | 2.791712 |
| 17507573 | Adprhl1      | ADP-ribosylhydrolase like 1                                                        | 7.498801 | 7.173166 | 6.992896 | 9.431257 | 7.068627 | 8.103583 |

|          |          |                                                             |          |          |          |          |          |          |
|----------|----------|-------------------------------------------------------------|----------|----------|----------|----------|----------|----------|
| 17430023 | Adprhl2  | ADP-ribosylhydrolase like 2                                 | 19.52797 | 17.62059 | 20.95801 | 25.36118 | 21.66884 | 15.62225 |
| 17481057 | Art1     | ADP-ribosyltransferase 1                                    | 5.690203 | 8.161702 | 7.118583 | 7.16601  | 7.915223 | 8.596861 |
| 17493906 | Art2a-ps | ADP-ribosyltransferase 2a, pseudogene                       | 8.00061  | 7.221207 | 6.992896 | 6.900831 | 6.294754 | 6.047044 |
| 17493912 | Art2b    | ADP-ribosyltransferase 2b                                   | 7.844274 | 3.041894 | 7.769167 | 5.659835 | 3.167051 | 7.017562 |
| 17439094 | Art3     | ADP-ribosyltransferase 3                                    | 5.842112 | 5.590239 | 4.259695 | 7.084863 | 5.323002 | 5.246735 |
| 17472185 | Art4     | ADP-ribosyltransferase 4                                    | 21.03894 | 19.35333 | 20.96629 | 20.96629 | 20.0582  | 19.36152 |
| 17494020 | Art5     | ADP-ribosyltransferase 5                                    | 4.152931 | 4.513135 | 4.152931 | 5.036914 | 3.585116 | 4.152931 |
| 17361223 | Adrbk1   | adrenergic receptor kinase, beta 1                          | 45.95882 | 47.96101 | 47.26171 | 36.99068 | 43.42609 | 52.9339  |
| 17451297 | Adrbk2   | adrenergic receptor kinase, beta 2                          | 12.58218 | 20.03666 | 20.84746 | 18.49649 | 15.88144 | 15.1407  |
| 17301502 | Adra1a   | adrenergic receptor, alpha 1a                               | 7.8738   | 6.979724 | 6.960399 | 6.791311 | 6.641274 | 7.475655 |
| 17261982 | Adra1b   | adrenergic receptor, alpha 1b                               | 65.41955 | 75.25054 | 78.70645 | 75.08954 | 64.40898 | 72.11213 |
| 17391899 | Adra1d   | adrenergic receptor, alpha 1d                               | 3.439908 | 3.729055 | 3.729055 | 4.834645 | 3.729055 | 3.729055 |
| 17360440 | Adra2a   | adrenergic receptor, alpha 2a                               | 3.854223 | 5.351525 | 7.122778 | 5.002052 | 4.026454 | 4.164866 |
| 17375880 | Adra2b   | adrenergic receptor, alpha 2b                               | 32.94094 | 29.41541 | 20.68109 | 29.31506 | 25.35591 | 32.85088 |
| 17436823 | Adra2c   | adrenergic receptor, alpha 2c                               | 4.11836  | 4.710238 | 4.453933 | 6.295147 | 3.939056 | 5.538556 |
| 17360599 | Adrb1    | adrenergic receptor, beta 1                                 | 11.81453 | 12.70989 | 14.83775 | 12.70989 | 12.50766 | 14.37958 |
| 17354857 | Adrb2    | adrenergic receptor, beta 2                                 | 8.997037 | 10.21028 | 9.664734 | 8.650299 | 9.697548 | 9.281256 |
| 17508544 | Adrb3    | adrenergic receptor, beta 3                                 | 11.82682 | 12.37983 | 10.42684 | 11.71285 | 11.58037 | 9.566359 |
| 17512479 | Acd      | adrenocortical dysplasia                                    | 34.29437 | 36.80628 | 36.09482 | 35.60308 | 31.57454 | 34.29437 |
| 17481770 | Adm      | adrenomedullin                                              | 11.87726 | 16.86137 | 17.16395 | 10.55087 | 13.01614 | 13.58997 |
| 17314115 | Adm2     | adrenomedullin 2                                            | 4.295452 | 5.408318 | 5.617429 | 5.193942 | 6.793052 | 4.198314 |
| 17336618 | Ager     | advanced glycosylation end product-specific receptor        | 13.44521 | 16.20178 | 17.24194 | 16.79186 | 16.79186 | 15.6125  |
| 17237851 | Avil     | advillin                                                    | 8.749254 | 9.273539 | 8.750831 | 8.542214 | 8.733319 | 9.540269 |
| 17247039 | Aebp1    | AE binding protein 1                                        | 8.381567 | 10.49085 | 10.54195 | 10.54195 | 7.577542 | 9.500148 |
| 17464010 | Aebp2    | AE binding protein 2                                        | 63.82015 | 61.6821  | 62.09693 | 65.33481 | 64.31128 | 63.69464 |
| 17439741 | Aff1     | AF4/FMR2 family, member 1                                   | 42.97751 | 50.29036 | 58.81206 | 53.34348 | 48.61973 | 47.22307 |
| 17535245 | Aff2     | AF4/FMR2 family, member 2                                   | 3.914641 | 3.990944 | 3.990944 | 3.990944 | 4.136556 | 3.693222 |
| 17222465 | Aff3     | AF4/FMR2 family, member 3                                   | 4.332711 | 5.583153 | 4.663393 | 4.802881 | 4.854087 | 4.3115   |
| 17249489 | Aff4     | AF4/FMR2 family, member 4                                   | 224.5885 | 265.9571 | 246.0197 | 237.2986 | 234.1907 | 228.5934 |
| 17438920 | Afm      | afamin                                                      | 111.4058 | 108.273  | 92.6841  | 85.94251 | 128.6565 | 122.3525 |
| 17506661 | Afg3l1   | AFG3-like AAA ATPase 1                                      | 102.0378 | 87.07339 | 83.41818 | 82.51188 | 87.59703 | 72.46638 |
| 17355169 | Afg3l2   | AFG3-like AAA ATPase 2                                      | 115.6146 | 131.3015 | 132.0792 | 126.1241 | 115.3025 | 135.138  |
| 17260885 | Aftph    | aftiphilin                                                  | 69.82056 | 70.10474 | 70.99916 | 71.27825 | 77.25573 | 73.61766 |
| 17479335 | Acan     | aggrecan                                                    | 4.378176 | 4.378176 | 5.252412 | 4.319038 | 5.120306 | 5.132494 |
| 17421110 | Agmat    | agmatine ureohydrolase (agmatinase)                         | 318.9287 | 347.014  | 310.4764 | 313.0415 | 269.048  | 304.9312 |
| 17512467 | AgRP     | agouti related neuropeptide                                 | 4.927719 | 6.16786  | 5.606965 | 4.81398  | 4.793602 | 8.470517 |
| 17433977 | Agrn     | agrin                                                       | 29.47112 | 27.56107 | 24.42066 | 29.86885 | 25.16035 | 26.2059  |
| 17277609 | Ahsa1    | AHA1, activator of heat shock protein ATPase 1              | 131.4846 | 107.7101 | 102.3608 | 116.3494 | 108.0002 | 105.552  |
| 17261035 | Ahsa2    | AHA1, activator of heat shock protein ATPase 2              | 63.94413 | 50.33116 | 45.91425 | 45.78934 | 46.27272 | 46.18396 |
| 17357389 | Ahnak    | AHNAK nucleoprotein (desmoyokin)                            | 20.19295 | 20.55646 | 20.29159 | 20.29159 | 15.25003 | 19.43022 |
| 17284222 | Ahnak2   | AHNAK nucleoprotein 2                                       | 12.95916 | 9.993638 | 14.48281 | 12.52562 | 12.63374 | 14.80928 |
| 17547719 | Ahnak2   | AHNAK nucleoprotein 2                                       | 2.870058 | 3.344406 | 3.272175 | 3.099574 | 4.203235 | 3.327941 |
| 17293695 | Aaed1    | AhpC/TSA antioxidant enzyme domain containing 1             | 297.7567 | 318.3809 | 288.1867 | 311.5608 | 292.1975 | 304.8129 |
| 17306396 | Ajuba    | ajuba LIM protein                                           | 16.39268 | 22.81878 | 19.65072 | 21.09311 | 18.03178 | 14.37958 |
| 17429810 | Akirin1  | akirin 1                                                    | 12.30259 | 14.11229 | 9.008519 | 13.92794 | 11.35708 | 7.991022 |
| 17337404 | Gm6623   | akirin 1 pseudogene                                         | 4.20927  | 3.35325  | 3.052286 | 3.663823 | 3.083203 | 2.965468 |
| 17412645 | Akirin2  | akirin 2                                                    | 93.20723 | 90.02476 | 85.11609 | 93.78271 | 79.35394 | 91.30551 |
| 17401790 | Aknad1   | AKNA domain containing 1                                    | 3.704452 | 4.447856 | 4.355777 | 3.812639 | 4.833439 | 4.085719 |
| 17223277 | Gm6644   | Akr1b3 pseudogene                                           | 15.02195 | 13.76373 | 16.10269 | 22.48078 | 15.10946 | 16.02042 |
| 17477579 | Akt1s1   | AKT1 substrate 1 (proline-rich)                             | 36.02234 | 35.35984 | 31.34905 | 41.29313 | 36.95019 | 36.13337 |
| 17477595 | Akt1s1   | AKT1 substrate 1 (proline-rich)                             | 17.50397 | 26.1823  | 23.49513 | 20.50409 | 18.83286 | 18.5368  |
| 17311473 | Aard     | alanine and arginine rich domain containing protein         | 7.01479  | 6.148097 | 6.24837  | 8.998721 | 7.910671 | 7.889479 |
| 17215885 | Agxt     | alanine-glyoxylate aminotransferase                         | 204.9915 | 185.4942 | 196.3645 | 229.8725 | 257.979  | 318.3147 |
| 17310282 | Agxt2    | alanine-glyoxylate aminotransferase 2                       | 219.0566 | 226.4471 | 228.8423 | 245.5989 | 262.6504 | 296.9878 |
| 17492431 | Anpep    | alanyl (membrane) aminopeptidase                            | 212.2043 | 214.7047 | 250.9385 | 191.1432 | 233.3805 | 199.873  |
| 17337895 | Aars2    | alanyl-tRNA synthetase 2, mitochondrial (putative)          | 25.6851  | 21.91748 | 25.59269 | 28.16302 | 25.5045  | 25.70113 |
| 17269870 | Aarsd1   | alanyl-tRNA synthetase domain containing 1                  | 17.77503 | 19.16298 | 17.6722  | 18.71211 | 23.14245 | 18.93824 |
| 17438886 | Alb      | albumin                                                     | 7455.193 | 7834.796 | 7755.209 | 7195.254 | 7831.267 | 7575.892 |
| 17403070 | Adh1     | alcohol dehydrogenase 1 (class I)                           | 2842.412 | 3064.275 | 3323.16  | 2762.522 | 2666.589 | 2942.262 |
| 17403114 | Adh4     | alcohol dehydrogenase 4 (class II), pi polypeptide          | 515.0576 | 328.2611 | 174.4984 | 342.2271 | 337.4898 | 345.2697 |
| 17403126 | Adh5     | alcohol dehydrogenase 5 (class III), chi polypeptide        | 332.0899 | 336.0961 | 306.8777 | 336.3688 | 365.3841 | 354.6126 |
| 17403108 | Adh6-ps1 | alcohol dehydrogenase 6 (class V), pseudogene 1             | 156.8357 | 70.45597 | 70.16648 | 131.5165 | 108.7145 | 83.45809 |
| 17403084 | Adh6a    | alcohol dehydrogenase 6A (class V)                          | 3.783024 | 4.229333 | 3.786356 | 4.417561 | 5.550124 | 4.253263 |
| 17403096 | Adh6b    | alcohol dehydrogenase 6B (class V)                          | 4.418725 | 4.207578 | 4.224176 | 4.526105 | 4.260964 | 4.273891 |
| 17403058 | Adh7     | alcohol dehydrogenase 7 (class IV), mu or sigma polypeptide | 8.205265 | 8.272079 | 7.933294 | 9.524148 | 8.272079 | 6.347815 |
| 17211004 | Adhfe1   | alcohol dehydrogenase, iron containing, 1                   | 216.2461 | 263.4545 | 278.5901 | 251.5428 | 240.3478 | 241.3579 |
| 17413674 | Aldh1b1  | aldehyde dehydrogenase 1 family, member B1                  | 49.15342 | 57.52192 | 70.60116 | 59.06043 | 62.57958 | 66.67158 |
| 17460831 | Aldh1l1  | aldehyde dehydrogenase 1 family, member L1                  | 580.2778 | 595.5216 | 583.8484 | 668.4473 | 645.5567 | 727.9573 |
| 17243544 | Aldh1l2  | aldehyde dehydrogenase 1 family, member L2                  | 5.508731 | 5.67669  | 5.402024 | 5.830097 | 6.11304  | 5.22286  |
| 17490644 | Aldh16a1 | aldehyde dehydrogenase 16 family, member A1                 | 26.01461 | 26.14748 | 24.91996 | 25.38633 | 24.51121 | 24.77392 |
| 17364521 | Aldh18a1 | aldehyde dehydrogenase 18 family, member A1                 | 5.183944 | 5.880423 | 6.506988 | 6.100933 | 6.50541  | 5.67791  |
| 17452231 | Aldh2    | aldehyde dehydrogenase 2, mitochondrial                     | 2233.251 | 2063.089 | 1990.272 | 1994.097 | 1836.814 | 2021.752 |
| 17361041 | Aldh3b1  | aldehyde dehydrogenase 3 family, member B1                  | 16.39291 | 15.08727 | 19.99282 | 17.91964 | 19.58395 | 11.02915 |
| 17356028 | Aldh3b2  | aldehyde dehydrogenase 3 family, member B2                  | 13.524   | 13.524   | 13.9234  | 13.41644 | 18.25829 | 20.30833 |
| 17356016 | Aldh3b3  | aldehyde dehydrogenase 3 family, member B3                  | 5.201869 | 6.645787 | 6.47904  | 6.78924  | 6.992896 | 6.47904  |
| 17420777 | Aldh4a1  | aldehyde dehydrogenase 4 family, member A1                  | 227.9305 | 199.646  | 188.5064 | 196.6355 | 198.6879 | 237.0948 |
| 17232025 | Aldh8a1  | aldehyde dehydrogenase 8 family, member A1                  | 532.6891 | 539.6312 | 463.5496 | 440.7388 | 422.6911 | 424.7205 |
| 17219096 | Aldh9a1  | aldehyde dehydrogenase 9, subfamily A1                      | 483.563  | 515.0183 | 461.1141 | 474.6071 | 422.129  | 463.826  |
| 17358103 | Aldh1a1  | aldehyde dehydrogenase family 1, subfamily A1               | 1856.217 | 1694.813 | 1389.317 | 1742.678 | 1511.274 | 1821.991 |
| 17519112 | Aldh1a2  | aldehyde dehydrogenase family 1, subfamily A2               | 4.416826 | 4.877561 | 5.400189 | 5.045055 | 6.098101 | 6.064758 |
| 17491941 | Aldh1a3  | aldehyde dehydrogenase family 1, subfamily A3               | 5.391886 | 6.90107  | 5.082753 | 5.059799 | 5.059799 | 5.972107 |
| 17363429 | Aldh1a7  | aldehyde dehydrogenase family 1, subfamily A7               | 455.2894 | 444.5926 | 347.4713 | 414.8138 | 338.2603 | 405.8464 |
| 17250567 | Aldh3a1  | aldehyde dehydrogenase family 3, subfamily A1               | 4.33818  | 3.253314 | 4.045029 | 4.043851 | 4.404597 | 5.188221 |
| 17263724 | Aldh3a2  | aldehyde dehydrogenase family 3, subfamily A2               | 668.7902 | 830.4503 | 727.4831 | 682.3509 | 477.5838 | 642.3296 |

|          |           |                                                                                  |          |          |          |          |          |          |
|----------|-----------|----------------------------------------------------------------------------------|----------|----------|----------|----------|----------|----------|
| 17282518 | Aldh6a1   | aldehyde dehydrogenase family 6, subfamily A1                                    | 718.3285 | 656.0991 | 589.1863 | 683.8518 | 613.0751 | 670.345  |
| 17354434 | Aldh7a1   | aldehyde dehydrogenase family 7, member A1                                       | 629.9485 | 700.6888 | 660.2323 | 686.7732 | 572.5508 | 630.0271 |
| 17212982 | Aox1      | aldehyde oxidase 1                                                               | 179.5547 | 164.1795 | 128.7207 | 153.8414 | 106.4181 | 114.4275 |
| 17213101 | Aox2      | aldehyde oxidase 2                                                               | 5.145139 | 4.989828 | 6.287864 | 6.123727 | 6.094256 | 5.649213 |
| 17213021 | Aox3      | aldehyde oxidase 3                                                               | 864.283  | 512.355  | 371.4154 | 630.0183 | 662.8736 | 593.3666 |
| 17213060 | Aox4      | aldehyde oxidase 4                                                               | 2.642494 | 2.394625 | 2.470221 | 2.750454 | 2.636785 | 2.770257 |
| 17291361 | Aldh5a1   | aldehyde dehydrogenase family 5, subfamily A1                                    | 92.43325 | 97.68533 | 90.49461 | 97.87239 | 80.62079 | 104.7735 |
| 17428684 | Akr1a1    | aldo-keto reductase family 1, member A1 (aldehyde reductase)                     | 317.4994 | 347.1343 | 294.6299 | 325.4743 | 323.9237 | 319.9849 |
| 17457143 | Akr1b10   | aldo-keto reductase family 1, member B10 (aldose reductase)                      | 6.930887 | 7.518423 | 8.894047 | 9.992738 | 8.382961 | 7.109017 |
| 17465711 | Akr1b3    | aldo-keto reductase family 1, member B3 (aldose reductase)                       | 17.22151 | 21.90487 | 23.35598 | 13.54971 | 16.24935 | 19.82185 |
| 17457158 | Akr1b7    | aldo-keto reductase family 1, member B7                                          | 2.860148 | 2.945005 | 2.819658 | 3.444322 | 2.549987 | 2.602269 |
| 17457128 | Akr1b8    | aldo-keto reductase family 1, member B8                                          | 5.791994 | 3.695757 | 3.498921 | 3.359881 | 3.119057 | 3.630555 |
| 17290275 | Akr1c12   | aldo-keto reductase family 1, member C12                                         | 16.83393 | 20.48506 | 16.44925 | 17.21507 | 20.7467  | 22.77501 |
| 17284936 | Akr1c13   | aldo-keto reductase family 1, member C13                                         | 60.18992 | 67.76789 | 74.49285 | 74.07065 | 76.64873 | 87.85728 |
| 17284919 | Akr1c14   | aldo-keto reductase family 1, member C14                                         | 283.0906 | 276.4433 | 230.0877 | 251.9494 | 245.5989 | 304.6967 |
| 17290263 | Akr1c18   | aldo-keto reductase family 1, member C18                                         | 16.00144 | 11.42427 | 7.068578 | 13.62949 | 17.34755 | 21.99174 |
| 17284948 | Akr1c19   | aldo-keto reductase family 1, member C19                                         | 18.57049 | 17.34442 | 15.31836 | 16.01043 | 11.36637 | 12.25221 |
| 17290288 | Akr1c20   | aldo-keto reductase family 1, member C20                                         | 45.55918 | 30.87998 | 22.84157 | 39.75212 | 36.40084 | 42.42462 |
| 17284981 | Akr1c21   | aldo-keto reductase family 1, member C21                                         | 2.783307 | 2.685387 | 2.763583 | 2.763583 | 3.512723 | 2.841239 |
| 17284965 | Akr1c6    | aldo-keto reductase family 1, member C6                                          | 43.30255 | 42.91083 | 34.36124 | 59.43208 | 46.1446  | 39.43842 |
| 17223813 | Akr1c1    | aldo-keto reductase family 1, member C-like                                      | 4.222625 | 4.009688 | 3.248357 | 4.208686 | 3.802953 | 3.015673 |
| 17457330 | Akr1d1    | aldo-keto reductase family 1, member D1                                          | 216.5821 | 226.2917 | 258.3566 | 272.1371 | 298.4303 | 335.0935 |
| 17290301 | Akr1e1    | aldo-keto reductase family 1, member E1                                          | 65.34342 | 65.33028 | 68.2719  | 67.63462 | 60.81056 | 67.30912 |
| 17420604 | Akr7a5    | aldo-keto reductase family 7, member A5 (aflatoxin aldehyde reductase)           | 73.16897 | 76.76091 | 72.13762 | 68.81351 | 77.47506 | 74.09786 |
| 17426549 | Aldoat1   | aldolase 1 A, retrogene 1                                                        | 2.801016 | 2.627881 | 2.542381 | 3.16205  | 2.568596 | 2.62224  |
| 17275567 | Aldoat2   | aldolase 1 A, retrogene 2                                                        | 3.375778 | 2.177466 | 2.67402  | 3.3241   | 2.907683 | 2.218278 |
| 17496408 | Aldoa     | aldolase A, fructose-bisphosphate                                                | 13.30033 | 12.43194 | 12.57817 | 12.52623 | 13.7686  | 14.57264 |
| 17496427 | Aldoa     | aldolase A, fructose-bisphosphate                                                | 10.76085 | 9.935138 | 11.86179 | 11.48381 | 7.935109 | 10.77996 |
| 17425233 | Aldob     | aldolase B, fructose-bisphosphate                                                | 2156.954 | 2172.635 | 2095.095 | 2083.798 | 2026.283 | 2146.068 |
| 17253599 | Aldoc     | aldolase C, fructose-bisphosphate                                                | 33.53673 | 39.70008 | 34.20108 | 32.83631 | 40.53033 | 29.16993 |
| 17346401 | Acer1     | alkaline ceramidase 1                                                            | 3.139076 | 2.817567 | 2.834865 | 2.935548 | 3.20277  | 3.286154 |
| 17415219 | Acer2     | alkaline ceramidase 2                                                            | 31.85637 | 34.78468 | 36.95557 | 30.89454 | 25.29166 | 30.89454 |
| 17493556 | Acer3     | alkaline ceramidase 3                                                            | 18.39255 | 13.81583 | 13.36187 | 12.82449 | 12.23159 | 11.15865 |
| 17215166 | Akp3      | alkaline phosphatase 3, intestine, not Mn requiring                              | 3.341116 | 4.27475  | 4.795695 | 3.978019 | 4.130997 | 4.218354 |
| 17225210 | Alpi      | alkaline phosphatase, intestinal                                                 | 4.995607 | 5.068118 | 5.783449 | 4.973219 | 4.981534 | 6.404696 |
| 17431720 | Alpl      | alkaline phosphatase, liver/bone/kidney                                          | 21.87711 | 37.11036 | 49.65063 | 35.92808 | 29.13639 | 27.6217  |
| 17225196 | Alppl2    | alkaline phosphatase, placental-like 2                                           | 4.563403 | 5.020427 | 4.60372  | 4.60372  | 3.290325 | 4.60372  |
| 17282886 | Alkbh1    | alkB, alkylation repair homolog 1 (E. coli)                                      | 12.40036 | 9.98097  | 14.05713 | 12.46154 | 16.22853 | 13.83461 |
| 17451504 | Alkbh2    | alkB, alkylation repair homolog 2 (E. coli)                                      | 27.73835 | 27.0966  | 32.12668 | 31.21008 | 27.53854 | 30.95198 |
| 17388551 | Alkbh3    | alkB, alkylation repair homolog 3 (E. coli)                                      | 39.086   | 42.48583 | 36.3217  | 39.41547 | 36.96121 | 40.46941 |
| 17443437 | Alkbh4    | alkB, alkylation repair homolog 4 (E. coli)                                      | 19.62866 | 23.38319 | 17.86582 | 19.62866 | 19.05041 | 19.62866 |
| 17250460 | Alkbh5    | alkB, alkylation repair homolog 5 (E. coli)                                      | 121.1105 | 95.24424 | 91.78268 | 81.38269 | 92.45183 | 88.13725 |
| 17476335 | Alkbh6    | alkB, alkylation repair homolog 6 (E. coli)                                      | 23.69449 | 20.45342 | 23.1285  | 21.18909 | 16.25363 | 26.47484 |
| 17338934 | Alkbh7    | alkB, alkylation repair homolog 7 (E. coli)                                      | 16.82915 | 23.03746 | 16.71023 | 25.27011 | 16.66917 | 23.24502 |
| 17514359 | Alkbh8    | alkB, alkylation repair homolog 8 (E. coli)                                      | 30.78509 | 23.27308 | 22.04195 | 21.92006 | 22.43797 | 19.46445 |
| 17275069 | Agmo      | alkylglycerol monooxygenase                                                      | 138.6881 | 169.1841 | 166.3306 | 143.7083 | 143.4844 | 168.2194 |
| 17372161 | Agps      | alkylglycerone phosphate synthase                                                | 26.99836 | 24.56275 | 23.2918  | 23.73477 | 22.24039 | 20.49642 |
| 17280368 | Allc      | allantoicase                                                                     | 3.61827  | 3.40329  | 4.562675 | 3.953526 | 4.844608 | 4.085946 |
| 17344289 | Aif1      | allograft inflammatory factor 1                                                  | 10.54517 | 9.675525 | 10.54517 | 9.131045 | 14.30492 | 10.07683 |
| 17369613 | Aif1l     | allograft inflammatory factor 1-like                                             | 12.313   | 12.313   | 11.80618 | 12.22642 | 10.13314 | 13.29931 |
| 17435963 | Aitrad    | all-trans retinoic acid induced differentiation factor                           | 101.4011 | 105.9361 | 118.9936 | 104.8352 | 133.455  | 136.145  |
| 17426237 | Ambp      | alpha 1 microglobulin/bikunin                                                    | 1549.632 | 1493.157 | 1400.902 | 1247.419 | 1538.139 | 1256.896 |
| 17418881 | A3galt2   | alpha 1,3-galactosyltransferase 2 (isoglobotriaosylceramide synthase)            | 7.626336 | 7.545727 | 7.648676 | 8.530203 | 8.347649 | 7.767929 |
| 17319801 | A4galt    | alpha 1,4-galactosyltransferase                                                  | 7.990911 | 8.859161 | 8.467112 | 10.89066 | 8.577754 | 7.422576 |
| 17518256 | Aagab     | alpha- and gamma-adaptin binding protein                                         | 21.78223 | 20.30031 | 18.90532 | 25.07087 | 24.76241 | 24.28275 |
| 17438903 | Afp       | alpha fetoprotein                                                                | 13.56014 | 11.43172 | 12.33905 | 13.67378 | 15.03643 | 12.6885  |
| 17357280 | Ganab     | alpha glucosidase 2 alpha neutral subunit                                        | 172.2977 | 148.6371 | 149.5029 | 150.5553 | 154.7483 | 142.6771 |
| 17543930 | Atrx      | alpha thalassemia/mental retardation syndrome X-linked homolog (human)           | 64.03062 | 65.97283 | 60.187   | 64.91365 | 66.20233 | 64.03062 |
| 17344472 | Atat1     | alpha tubulin acetyltransferase 1                                                | 20.38604 | 23.62447 | 27.17391 | 26.66102 | 17.67257 | 21.70492 |
| 17520736 | A4gnt     | alpha-1,4-N-acetylglucosaminyltransferase                                        | 3.599758 | 3.160165 | 3.729055 | 3.67397  | 4.312995 | 3.729055 |
| 17317398 | A1bg      | alpha-1-B glycoprotein                                                           | 4.740043 | 4.478265 | 4.47417  | 4.929803 | 3.876111 | 5.519968 |
| 17443710 | Azgp1     | alpha-2-glycoprotein 1, zinc                                                     | 2407.366 | 2378.374 | 2305.478 | 2227.145 | 2354.557 | 2208.667 |
| 17324322 | Ahsg      | alpha-2-HS-glycoprotein                                                          | 5136.928 | 5357.002 | 5735.526 | 5005.505 | 5830.969 | 5431.895 |
| 17462492 | A2m       | alpha-2-macroglobulin                                                            | 3.749167 | 4.95646  | 5.728351 | 5.254706 | 4.861461 | 4.325869 |
| 17410204 | Alpk1     | alpha-kinase 1                                                                   | 7.793817 | 8.829612 | 8.416148 | 8.428524 | 8.852347 | 6.883966 |
| 17355060 | Alpk2     | alpha-kinase 2                                                                   | 3.191291 | 4.185326 | 2.99397  | 3.378634 | 3.300398 | 3.454795 |
| 17479628 | Alpk3     | alpha-kinase 3                                                                   | 4.055697 | 4.442772 | 4.882568 | 3.597538 | 4.230564 | 4.276291 |
| 17310349 | Amacr     | alpha-methylacyl-CoA racemase                                                    | 377.3344 | 297.959  | 277.555  | 359.2215 | 291.2794 | 303.3081 |
| 17256502 | Naglu     | alpha-N-acetylglucosaminidase (Sanfilippo disease IIIB)                          | 34.30269 | 38.8669  | 38.55511 | 33.32886 | 42.10209 | 31.51114 |
| 17296653 | Gm3002    | alpha-takusan pseudogene                                                         | 2.763851 | 2.301317 | 2.621623 | 2.552534 | 2.732743 | 4.113938 |
| 17545078 | Ammecr1   | Alport syndrome, mental retardation, midface hypoplasia and elliptocytosis chrom | 5.848757 | 5.386134 | 5.398318 | 5.386134 | 5.694424 | 5.905012 |
| 17522504 | Als2cl    | ALS2 C-terminal like                                                             | 21.70687 | 15.52703 | 19.62866 | 20.8466  | 12.9766  | 18.98476 |
| 17460307 | Alms1     | Alstrom syndrome 1                                                               | 8.314215 | 9.79829  | 11.44964 | 10.22083 | 10.51961 | 9.699834 |
| 17460333 | Alms1-ps2 | Alstrom syndrome 1, pseudogene 2                                                 | 2.084325 | 2.117042 | 2.137597 | 2.722024 | 1.98923  | 2.727709 |
| 17259445 | Aspsc1    | alveolar soft part sarcoma chromosome region, candidate 1 (human)                | 104.7045 | 109.1297 | 117.5874 | 121.8017 | 118.9895 | 130.4741 |
| 17244608 | Alx1      | ALX homeobox 1                                                                   | 5.120306 | 3.515817 | 4.20927  | 5.852853 | 5.343704 | 5.120306 |
| 17273191 | Alyref    | Aly/REF export factor                                                            | 4.845045 | 4.814113 | 4.798788 | 6.168501 | 5.333601 | 7.708927 |
| 17219374 | Alyref2   | Aly/REF export factor 2                                                          | 19.073   | 28.56111 | 23.10559 | 22.10131 | 21.76126 | 22.78859 |
| 17438759 | Ambn      | ameloblastin                                                                     | 3.139337 | 3.854731 | 3.435524 | 3.283558 | 2.837873 | 2.860823 |
| 17546180 | Amelx     | amelogenin, X-linked                                                             | 3.512577 | 3.401615 | 3.458269 | 4.215577 | 3.584172 | 3.554656 |
| 17438749 | Amtn      | amelotin                                                                         | 4.112085 | 3.011454 | 3.221405 | 4.236638 | 3.938101 | 3.339703 |
| 17244350 | Amdhd1    | amidohydrolase domain containing 1                                               | 348.2187 | 342.3006 | 340.2285 | 366.706  | 366.4341 | 387.357  |
| 17341712 | Amdhd2    | amidohydrolase domain containing 2                                               | 30.09746 | 26.1961  | 25.06791 | 28.71296 | 27.73258 | 26.73615 |
| 17256691 | Aoc2      | amine oxidase, copper containing 2 (retina-specific)                             | 8.198671 | 9.187676 | 9.210376 | 8.391915 | 9.188249 | 8.866901 |

|          |            |                                                                                     |          |          |          |          |          |          |
|----------|------------|-------------------------------------------------------------------------------------|----------|----------|----------|----------|----------|----------|
| 17256697 | Aoc3       | amine oxidase, copper containing 3                                                  | 4.477893 | 5.590162 | 3.748569 | 4.238048 | 3.847416 | 3.642023 |
| 17458407 | Aoc1       | amine oxidase, copper-containing 1                                                  | 4.460761 | 4.730131 | 4.6731   | 4.893749 | 5.767676 | 5.305983 |
| 17216779 | Acmsd      | amino carboxymuconate semialdehyde decarboxylase                                    | 129.2589 | 83.62776 | 108.105  | 195.9606 | 155.1608 | 186.7663 |
| 17410424 | Aimp1      | aminoacyl tRNA synthetase complex-interacting multifunctional protein 1             | 44.02314 | 34.00512 | 39.66075 | 37.08413 | 43.20881 | 40.29671 |
| 17454908 | Aimp2      | aminoacyl tRNA synthetase complex-interacting multifunctional protein 2             | 29.94576 | 29.3828  | 33.74051 | 27.08702 | 26.47722 | 29.94576 |
| 17530669 | Acy1       | aminoacylase 1                                                                      | 29.29556 | 33.08969 | 40.04333 | 32.96196 | 35.0191  | 38.57007 |
| 17501329 | Aadat      | aminoadipate aminotransferase                                                       | 520.5056 | 365.7667 | 394.2372 | 430.4793 | 360.9162 | 438.2438 |
| 17449008 | Aasdh      | aminoadipate-semialdehyde dehydrogenase                                             | 14.47478 | 15.02403 | 15.23914 | 19.18225 | 15.23914 | 13.08562 |
| 17523695 | Aasdhppt   | aminoadipate-semialdehyde dehydrogenase-phosphopantetheinyl transferase             | 95.04178 | 54.83405 | 59.01624 | 79.22314 | 51.31078 | 66.90212 |
| 17465080 | Aass       | aminoadipate-semialdehyde synthase                                                  | 640.3558 | 605.0288 | 665.7515 | 800.7955 | 622.0643 | 835.5834 |
| 17426206 | Alad       | aminolevulinatase, delta-, dehydratase                                              | 151.297  | 150.8008 | 148.0233 | 149.8817 | 146.6151 | 145.8579 |
| 17530653 | Alas1      | aminolevulinic acid synthase 1                                                      | 677.4121 | 759.3546 | 822.5502 | 421.1703 | 544.3007 | 391.4678 |
| 17538575 | Alas2      | aminolevulinic acid synthase 2, erythroid                                           | 86.30128 | 51.0603  | 57.72443 | 58.55173 | 49.21342 | 29.96279 |
| 17521661 | Amt        | aminomethyltransferase                                                              | 96.69035 | 105.9111 | 113.5898 | 119.3959 | 133.2046 | 132.1397 |
| 17268493 | Npepps     | aminopeptidase puromycin sensitive                                                  | 54.30338 | 52.92729 | 51.02775 | 51.25    | 37.29447 | 45.21815 |
| 17380291 | Npepl1     | aminopeptidase-like 1                                                               | 81.16917 | 85.83594 | 83.59936 | 85.82702 | 71.71684 | 84.09453 |
| 17235748 | Aes        | amino-terminal enhancer of split                                                    | 670.8145 | 676.68   | 674.8766 | 649.2904 | 606.9021 | 617.502  |
| 17349162 | Ammecr1l   | AMME chromosomal region gene 1-like                                                 | 96.66824 | 130.7956 | 126.8456 | 131.007  | 113.9084 | 139.0481 |
| 17279088 | Amn        | amniotless                                                                          | 13.31712 | 13.20287 | 12.41283 | 10.77279 | 9.032467 | 9.203228 |
| 17285488 | Amph       | amphiphysin                                                                         | 4.20927  | 4.620343 | 4.20927  | 3.94742  | 4.805545 | 4.298013 |
| 17439029 | Areg       | amphiregulin                                                                        | 7.492982 | 9.856121 | 10.83727 | 10.0497  | 9.426486 | 8.35228  |
| 17245709 | Os9        | amplified in osteosarcoma                                                           | 272.6223 | 258.0595 | 260.6139 | 257.8235 | 266.7399 | 268.1395 |
| 17544316 | Astx       | amplified spermatogenic transcripts X encoded                                       | 2.261814 | 2.997501 | 2.972754 | 2.979499 | 2.867751 | 2.99908  |
| 17537409 | Astx1c     | amplified spermatogenic transcripts X encoded 1C [Source:MGI Symbol;Acc:MGI:3       | 3.513941 | 4.672841 | 4.534835 | 3.583278 | 4.387016 |          |
| 17537450 | Astx1c     | amplified spermatogenic transcripts X encoded 1C [Source:MGI Symbol;Acc:MGI:3       | 3.513941 | 4.672841 | 4.534835 | 3.583278 | 4.387016 |          |
| 17537488 | Astx1c     | amplified spermatogenic transcripts X encoded 1C [Source:MGI Symbol;Acc:MGI:3       | 3.513941 | 4.672841 | 4.534835 | 3.583278 | 4.387016 |          |
| 17544300 | Astx2      | amplified spermatogenic transcripts X encoded 2 [Source:MGI Symbol;Acc:MGI:37       | 3.464723 | 2.575745 | 2.625842 | 2.606909 | 2.625842 | 2.263068 |
| 17537513 | Astx3      | amplified spermatogenic transcripts X encoded 3 [Source:MGI Symbol;Acc:MGI:37       | 3.518255 | 4.439232 | 4.791708 | 3.801213 | 4.007771 | 4.427063 |
| 17537423 | Astx4d     | amplified spermatogenic transcripts X encoded 4D [Source:MGI Symbol;Acc:MGI:3       | 3.339518 | 3.639777 | 5.20941  | 4.234847 | 3.634911 | 4.13157  |
| 17537437 | Astx4d     | amplified spermatogenic transcripts X encoded 4D [Source:MGI Symbol;Acc:MGI:3       | 3.339518 | 3.639777 | 5.20941  | 4.234847 | 3.634911 | 4.13157  |
| 17537483 | Astx4d     | amplified spermatogenic transcripts X encoded 4D [Source:MGI Symbol;Acc:MGI:3       | 3.339518 | 3.639777 | 5.20941  | 4.234847 | 3.634911 | 4.13157  |
| 17537502 | Astx4d     | amplified spermatogenic transcripts X encoded 4D [Source:MGI Symbol;Acc:MGI:3       | 3.339518 | 3.639777 | 5.20941  | 4.234847 | 3.634911 | 4.13157  |
| 17544290 | Astx6      | amplified spermatogenic transcripts X encoded 6                                     | 2.739381 | 2.433883 | 3.010827 | 3.703322 | 2.73263  | 2.205185 |
| 17409575 | Amy1       | amylase 1, salivary                                                                 | 211.1201 | 170.4612 | 147.9371 | 198.6273 | 227.2285 | 257.181  |
| 17409513 | Amy2a5     | amylase 2a5                                                                         | 22.6497  | 17.11655 | 16.67633 | 17.37848 | 25.97749 | 21.39764 |
| 17409526 | Amy2a5     | amylase 2a5                                                                         | 20.96237 | 17.43398 | 17.93667 | 17.59569 | 26.05449 | 22.81183 |
| 17409540 | Amy2a5     | amylase 2a5                                                                         | 30.12146 | 24.15182 | 23.81387 | 24.43081 | 36.19077 | 31.22934 |
| 17409555 | Amy2a5     | amylase 2a5                                                                         | 22.40579 | 18.06368 | 17.20541 | 18.98003 | 25.40499 | 22.22251 |
| 17409502 | Amy2b      | amylase 2b                                                                          | 3.776344 | 2.420844 | 4.082237 | 2.152331 | 3.054508 | 2.725857 |
| 17409753 | Ag1        | amylo-1,6-glucosidase, 4-alpha-glucanotransferase                                   | 59.35715 | 59.44279 | 60.02161 | 61.19916 | 63.42238 | 61.31465 |
| 17331669 | App        | amyloid beta (A4) precursor protein                                                 | 113.7261 | 139.6702 | 187.6838 | 119.7615 | 105.0877 | 104.5863 |
| 17358240 | Apba1      | amyloid beta (A4) precursor protein binding, family A, member 1                     | 3.364122 | 3.438454 | 4.133919 | 3.154803 | 3.773858 | 4.77202  |
| 17478889 | Apba2      | amyloid beta (A4) precursor protein-binding, family A, member 2                     | 4.20962  | 4.360822 | 4.20962  | 4.664039 | 3.23483  | 3.867604 |
| 17235647 | Apba3      | amyloid beta (A4) precursor protein-binding, family A, member 3                     | 30.12021 | 26.76118 | 26.76118 | 28.2653  | 25.46846 | 24.63453 |
| 17494510 | Apbb1      | amyloid beta (A4) precursor protein-binding, family B, member 1                     | 8.495801 | 7.931699 | 8.54707  | 7.931699 | 8.549144 | 7.931699 |
| 17367533 | Apbb1ip    | amyloid beta (A4) precursor protein-binding, family B, member 1 interacting prote   | 4.619158 | 3.255096 | 3.577347 | 2.788772 | 3.255096 | 3.255096 |
| 17367536 | Apbb1ip    | amyloid beta (A4) precursor protein-binding, family B, member 1 interacting prote   | 12.68587 | 12.42454 | 13.36835 | 14.0903  | 14.63104 | 13.02553 |
| 17448415 | Apbb2      | amyloid beta (A4) precursor protein-binding, family B, member 2                     | 39.74606 | 48.15721 | 50.52025 | 38.26358 | 42.17657 | 38.59923 |
| 17353716 | Apbb3      | amyloid beta (A4) precursor protein-binding, family B, member 3                     | 9.054532 | 13.12422 | 15.8755  | 13.43766 | 14.70189 | 16.28758 |
| 17489052 | Appl1      | amyloid beta (A4) precursor-like protein 1                                          | 11.12081 | 12.29347 | 12.62271 | 12.05024 | 11.56746 | 13.07936 |
| 17525263 | Appl2      | amyloid beta (A4) precursor-like protein 2                                          | 349.3163 | 419.4747 | 421.2316 | 332.1889 | 369.0136 | 349.9609 |
| 17267155 | Appbp2     | amyloid beta precursor protein (cytoplasmic tail) binding protein 2                 | 64.55245 | 53.81812 | 46.82023 | 47.09461 | 46.183   | 56.19695 |
| 17254532 | Appbp2os   | amyloid beta precursor protein (cytoplasmic tail) binding protein 2, opposite strar | 15.41999 | 14.96614 | 17.69684 | 22.67971 | 13.54464 | 16.31797 |
| 17223532 | Als2       | amyotrophic lateral sclerosis 2 (juvenile)                                          | 75.88643 | 74.88111 | 72.05517 | 73.80415 | 80.5828  | 65.54619 |
| 17223473 | Als2cr11   | amyotrophic lateral sclerosis 2 (juvenile) chromosome region, candidate 11 (huma    | 2.55588  | 2.327466 | 2.809571 | 3.782893 | 2.649206 |          |
| 17223429 | Als2cr12   | amyotrophic lateral sclerosis 2 (juvenile) chromosome region, candidate 12 (huma    | 4.995469 | 5.831876 | 5.109847 | 6.346099 | 3.729055 | 4.578897 |
| 17391422 | Anapc1     | anaphase promoting complex subunit 1                                                | 59.77706 | 58.1223  | 55.62109 | 56.85479 | 51.74294 | 54.97486 |
| 17502781 | Anapc10    | anaphase promoting complex subunit 10                                               | 11.54503 | 17.06656 | 16.42214 | 13.39953 | 20.44803 | 17.03441 |
| 17259422 | Anapc11    | anaphase promoting complex subunit 11                                               | 20.43089 | 18.62786 | 21.08522 | 20.58583 | 20.72126 | 25.86358 |
| 17520851 | Anapc13    | anaphase promoting complex subunit 13                                               | 393.4946 | 384.9187 | 357.4283 | 373.9107 | 511.7765 | 420.5315 |
| 17241038 | Anapc16    | anaphase promoting complex subunit 16                                               | 73.93113 | 70.82319 | 66.15691 | 73.32738 | 71.1578  | 63.41666 |
| 17367892 | Anapc2     | anaphase promoting complex subunit 2                                                | 45.79315 | 47.42777 | 45.79315 | 45.79315 | 42.85436 | 39.01021 |
| 17437425 | Anapc4     | anaphase promoting complex subunit 4                                                | 25.72252 | 21.27386 | 26.67451 | 28.23984 | 33.29445 | 30.29085 |
| 17442107 | Anapc7     | anaphase promoting complex subunit 7                                                | 51.67663 | 40.19628 | 34.4736  | 36.09332 | 38.08128 | 43.98653 |
| 17480962 | Anapc15    | anaphase promoting complex C subunit 15                                             | 7.891831 | 7.503429 | 7.870689 | 7.870689 | 7.870689 | 9.883486 |
| 17244524 | Anapc15-ps | anaphase promoting complex C subunit 15, pseudogene [Source:MGI Symbol;Ac           | 13.86129 | 22.01462 | 20.32523 | 26.78419 | 13.87225 | 15.86274 |
| 17452477 | Anapc5     | anaphase-promoting complex subunit 5                                                | 117.9433 | 126.6137 | 114.6053 | 101.8258 | 108.0054 | 113.7064 |
| 17347082 | Alk        | anaplastic lymphoma kinase                                                          | 7.040022 | 7.076176 | 7.955541 | 8.6494   | 6.53832  | 7.074019 |
| 17459888 | Aup1       | ancient ubiquitous protein 1                                                        | 314.5422 | 309.6404 | 309.6404 | 300.3269 | 294.6912 | 286.2278 |
| 17292084 | Adtrp      | androgen dependent TFPI regulating protein                                          | 82.94252 | 70.31643 | 73.85839 | 75.14108 | 70.16793 | 79.22534 |
| 17536436 | Ar         | androgen receptor                                                                   | 4.20927  | 4.20927  | 3.562179 | 4.486063 | 4.403834 | 3.878369 |
| 17239420 | Aig1       | androgen-induced 1                                                                  | 28.95278 | 36.22742 | 31.12237 | 30.06119 | 31.00438 | 28.29686 |
| 17239184 | Adgb       | androglobin                                                                         | 9.682905 | 11.96634 | 11.95324 | 12.69158 | 14.09821 | 12.6475  |
| 17282760 | Angel1     | angel homolog 1 (Drosophila)                                                        | 8.89454  | 11.34599 | 9.845239 | 10.49696 | 9.9412   | 11.78092 |
| 17220751 | Angel2     | angel homolog 2 (Drosophila)                                                        | 14.41661 | 13.03059 | 15.61748 | 17.06821 | 17.87127 | 16.75907 |
| 17224256 | Aamp       | angio-associated migratory protein                                                  | 81       | 80.85584 | 71.90499 | 78.94631 | 93.32489 | 83.59762 |
| 17295093 | Aggf1      | angiogenic factor with G patch and FHA domains 1                                    | 56.38932 | 51.06313 | 55.47055 | 55.78982 | 57.33126 | 57.26612 |
| 17306102 | Ang2       | angiogenin, ribonuclease A family, member 2                                         | 2.364377 | 2.403905 | 1.902637 | 2.138753 | 2.434204 | 2.005539 |
| 17306143 | Ang4       | angiogenin, ribonuclease A family, member 4                                         | 3.28727  | 2.754213 | 3.083866 | 4.636544 | 3.750362 | 3.263862 |
| 17299093 | Ang5       | angiogenin, ribonuclease A family, member 5                                         | 1.942857 | 1.950292 | 1.908594 | 1.887792 | 2.622277 | 2.129213 |
| 17305527 | Ang6       | angiogenin, ribonuclease A family, member 6                                         | 3.913719 | 3.543881 | 4.109264 | 3.630404 | 5.731489 | 3.438692 |
| 17299575 | Ang        | angiogenin, ribonuclease, RNase A family, 5                                         | 288.9908 | 323.5848 | 303.6804 | 272.2881 | 324.5147 | 305.5617 |
| 17545159 | Amot       | angiomotin                                                                          | 14.92315 | 21.26192 | 18.44682 | 14.90185 | 19.83629 | 18.54258 |
| 17524028 | Amotl1     | angiomotin-like 1                                                                   | 22.62789 | 25.2358  | 27.51488 | 24.94243 | 19.96803 | 23.16123 |

|          |          |                                                                 |          |          |          |          |          |          |
|----------|----------|-----------------------------------------------------------------|----------|----------|----------|----------|----------|----------|
| 17520856 | Amotl2   | angiomotin-like 2                                               | 25.05871 | 21.86558 | 25.40305 | 24.9682  | 21.94089 | 25.8496  |
| 17316780 | Angpt1   | angiotensin-like 1                                              | 4.323831 | 4.148644 | 3.438645 | 4.207607 | 4.163855 | 4.945958 |
| 17507799 | Angpt2   | angiotensin-like 2                                              | 3.411935 | 4.338481 | 3.347723 | 3.287019 | 4.808244 | 5.051634 |
| 17377638 | Angpt4   | angiotensin-like 4                                              | 7.258543 | 6.794465 | 7.22346  | 6.366277 | 5.908205 | 7.127519 |
| 17218449 | Angptl1  | angiotensin-like 1                                              | 3.416171 | 3.667711 | 3.653958 | 4.408384 | 4.504853 | 3.315186 |
| 17370043 | Angptl2  | angiotensin-like 2                                              | 12.49302 | 13.66932 | 12.17078 | 14.10828 | 13.18467 | 14.19666 |
| 17415728 | Angptl3  | angiotensin-like 3                                              | 396.9655 | 397.7643 | 423.4506 | 405.9983 | 614.0235 | 480.2427 |
| 17343628 | Angptl4  | angiotensin-like 4                                              | 198.5282 | 235.9668 | 274.2409 | 228.8772 | 206.5604 | 210.1069 |
| 17254515 | Angptl6  | angiotensin-like 6                                              | 24.74611 | 22.93613 | 24.24642 | 24.24021 | 27.68457 | 24.20243 |
| 17432976 | Angptl7  | angiotensin-like 7                                              | 9.906943 | 10.48409 | 13.43729 | 9.852979 | 12.02971 | 10.57686 |
| 17515335 | Angptl8  | angiotensin-like 8                                              | 32.21454 | 34.75961 | 30.93247 | 40.43969 | 45.05234 | 36.2347  |
| 17257444 | Ace      | angiotensin I converting enzyme (peptidyl-dipeptidase A) 1      | 8.867024 | 7.698994 | 7.66736  | 9.127375 | 6.218127 | 9.997934 |
| 17539494 | Ace2     | angiotensin I converting enzyme (peptidyl-dipeptidase A) 2      | 3.745764 | 3.631486 | 3.540738 | 3.703245 | 3.737076 | 3.737076 |
| 17286271 | Agtr1a   | angiotensin II receptor, type 1a                                | 122.3322 | 182.1824 | 179.825  | 149.2751 | 169.868  | 154.0217 |
| 17404366 | Agtr1b   | angiotensin II receptor, type 1b                                | 3.263862 | 3.263862 | 3.896152 | 3.433952 | 3.77493  | 3.133077 |
| 17533746 | Agtr2    | angiotensin II receptor, type 2                                 | 3.88488  | 4.20927  | 4.20927  | 4.20927  | 4.854424 | 4.20927  |
| 17432895 | Agtrap   | angiotensin II, type I receptor-associated protein              | 6.947626 | 8.769594 | 9.548605 | 10.04433 | 9.118332 | 8.162833 |
| 17514078 | Agt      | angiotensinogen (serpin peptidase inhibitor, clade A, member 8) | 313.7583 | 312.4432 | 378.9044 | 286.4283 | 339.9739 | 354.114  |
| 17524969 | Anln     | anillin, actin binding protein                                  | 4.029051 | 3.883991 | 4.316614 | 3.786513 | 3.533554 | 4.005105 |
| 17405389 | Ankub1   | ankrin repeat and ubiquitin domain containing 1                 | 3.761088 | 4.435664 | 4.597979 | 4.336857 | 3.539732 | 5.903498 |
| 17500005 | Ank1     | ankyrin 1, erythroid                                            | 11.29287 | 8.786082 | 11.19234 | 9.384566 | 9.475421 | 8.429517 |
| 17410130 | Ank2     | ankyrin 2, brain                                                | 7.337456 | 7.337456 | 8.300338 | 7.23328  | 8.052741 | 7.337456 |
| 17234066 | Ank3     | ankyrin 3, epithelial                                           | 23.34853 | 27.32804 | 26.93481 | 25.17727 | 26.69819 | 24.78903 |
| 17224154 | Ankar    | ankyrin and armadillo repeat containing                         | 3.336164 | 3.249573 | 3.309607 | 3.279782 | 3.560871 | 3.268254 |
| 17468765 | Abtb1    | ankyrin repeat and BTB (POZ) domain containing 1                | 29.58697 | 25.77767 | 33.20779 | 30.14799 | 34.99799 | 29.76098 |
| 17373754 | Abtb2    | ankyrin repeat and BTB (POZ) domain containing 2                | 41.73136 | 36.49811 | 44.60984 | 45.50395 | 37.2152  | 45.81697 |
| 17528255 | Ankdd1a  | ankyrin repeat and death domain containing 1A                   | 5.37096  | 5.003439 | 4.192585 | 5.478952 | 6.217049 | 4.634199 |
| 17528271 | Ankdd1b  | ankyrin repeat and death domain containing 1A                   | 7.577175 | 10.11911 | 7.088842 | 7.849441 | 5.655012 | 9.08093  |
| 17295196 | Ankdd1b  | ankyrin repeat and death domain containing 1B                   | 6.299905 | 6.386653 | 6.263113 | 5.457613 | 5.482485 | 7.265741 |
| 17376798 | Ankef1   | ankyrin repeat and EF-hand domain containing 1                  | 3.173313 | 2.399677 | 2.747558 | 2.425429 | 3.056817 | 2.704103 |
| 17376805 | Ankef1   | ankyrin repeat and EF-hand domain containing 1                  | 4.280413 | 4.346578 | 4.437048 | 3.552021 | 3.952266 | 3.176857 |
| 17252408 | Ankyf1   | ankyrin repeat and FYVE domain containing 1                     | 71.99726 | 72.32036 | 72.28879 | 71.99726 | 67.09903 | 64.90555 |
| 17445280 | Ankib1   | ankyrin repeat and IBR domain containing 1                      | 77.63848 | 73.21463 | 72.96891 | 63.86307 | 60.9608  | 64.73931 |
| 17349671 | Ankhd1   | ankyrin repeat and KH domain containing 1                       | 68.95819 | 81.10393 | 65.42817 | 70.18837 | 70.18837 | 77.21183 |
| 17349713 | Ankhd1   | ankyrin repeat and KH domain containing 1                       | 62.10209 | 66.72798 | 72.18264 | 53.60367 | 75.78445 | 79.57206 |
| 17526743 | Ankk1    | ankyrin repeat and kinase domain containing 1                   | 4.337519 | 4.303797 | 4.745598 | 4.907064 | 4.061155 | 6.941801 |
| 17502179 | Ankle1   | ankyrin repeat and LEM domain containing 1                      | 12.57843 | 12.76729 | 15.84911 | 11.50086 | 10.32779 | 14.79707 |
| 17440439 | Ankle2   | ankyrin repeat and LEM domain containing 2                      | 51.87868 | 44.31644 | 38.83027 | 45.16959 | 48.70777 | 45.0564  |
| 17225603 | Ankmy1   | ankyrin repeat and MYND domain containing 1                     | 4.663328 | 4.890358 | 4.890358 | 4.824301 | 4.561632 | 5.127516 |
| 17275029 | Ankmy2   | ankyrin repeat and MYND domain containing 2                     | 23.53131 | 29.30368 | 28.82303 | 31.18478 | 28.66583 | 25.3983  |
| 17335204 | Anks1    | ankyrin repeat and SAM domain containing 1                      | 23.39016 | 19.32116 | 24.42827 | 21.16179 | 18.23186 | 22.6351  |
| 17215788 | Asb1     | ankyrin repeat and SOCS box-containing 1                        | 12.93941 | 14.56627 | 15.23914 | 13.5529  | 18.36478 | 18.35015 |
| 17446220 | Asb10    | ankyrin repeat and SOCS box-containing 10                       | 3.513089 | 4.537382 | 3.985636 | 3.52905  | 3.279214 | 4.060141 |
| 17539560 | Asb11    | ankyrin repeat and SOCS box-containing 11                       | 4.595176 | 4.023581 | 3.965465 | 4.468777 | 3.98583  | 3.649933 |
| 17543315 | Asb12    | ankyrin repeat and SOCS box-containing 12                       | 2.612227 | 2.573586 | 2.606909 | 2.693216 | 2.829682 | 2.606909 |
| 17284894 | Asb13    | ankyrin repeat and SOCS box-containing 13                       | 104.8403 | 87.64197 | 106.2891 | 68.45481 | 57.66124 | 56.28935 |
| 17297999 | Asb14    | ankyrin repeat and SOCS box-containing 14                       | 5.927279 | 5.74131  | 5.999574 | 6.603633 | 6.426129 | 5.74131  |
| 17456414 | Asb15    | ankyrin repeat and SOCS box-containing 15                       | 3.748647 | 3.477595 | 4.221103 | 3.892157 | 4.222508 | 2.953284 |
| 17256924 | Asb16    | ankyrin repeat and SOCS box-containing 16                       | 7.254419 | 6.739166 | 6.800072 | 5.564106 | 5.868411 | 5.928841 |
| 17403735 | Asb17    | ankyrin repeat and SOCS box-containing 17                       | 3.860372 | 3.165163 | 3.185147 | 3.28588  | 3.374117 | 3.211372 |
| 17411274 | Asb17os  | ankyrin repeat and SOCS box-containing 17, opposite strand      | 3.330203 | 3.136314 | 2.907582 | 4.496212 | 3.263862 | 2.310668 |
| 17225379 | Asb18    | ankyrin repeat and SOCS box-containing 18                       | 11.93271 | 9.61822  | 11.50086 | 11.7681  | 15.50434 | 12.85199 |
| 17283516 | Asb2     | ankyrin repeat and SOCS box-containing 2                        | 12.42919 | 9.507328 | 12.81312 | 12.42919 | 8.940032 | 8.508472 |
| 17248196 | Asb3     | ankyrin repeat and SOCS box-containing 3                        | 11.84782 | 12.49397 | 12.35206 | 13.69588 | 18.49649 | 14.54599 |
| 17455903 | Asb4     | ankyrin repeat and SOCS box-containing 4                        | 4.438893 | 3.9518   | 4.304155 | 3.723889 | 4.770069 | 4.384614 |
| 17501170 | Asb5     | ankyrin repeat and SOCS box-containing 5                        | 3.714943 | 2.67402  | 2.588058 | 2.789178 | 2.564558 | 2.580517 |
| 17383699 | Asb6     | ankyrin repeat and SOCS box-containing 6                        | 17.09864 | 18.10116 | 17.03547 | 16.00621 | 14.96977 | 16.36997 |
| 17491961 | Asb7     | ankyrin repeat and SOCS box-containing 7                        | 13.14899 | 11.56313 | 11.54215 | 14.87327 | 11.88673 | 12.24686 |
| 17321169 | Asb8     | ankyrin repeat and SOCS box-containing 8                        | 39.78493 | 43.75482 | 35.06816 | 44.53075 | 37.14664 | 44.10346 |
| 17539574 | Asb9     | ankyrin repeat and SOCS box-containing 9                        | 4.638087 | 4.323321 | 4.399593 | 3.572317 | 3.671145 | 3.737931 |
| 17236439 | Anks1b   | ankyrin repeat and sterile alpha motif domain containing 1B     | 2.739989 | 3.521793 | 3.114262 | 3.478873 | 2.937177 | 3.114261 |
| 17327842 | Anks3    | ankyrin repeat and sterile alpha motif domain containing 3      | 14.66739 | 13.3019  | 13.12422 | 13.49263 | 13.07827 | 10.16233 |
| 17482376 | Anks4b   | ankyrin repeat and sterile alpha motif domain containing 4B     | 27.44535 | 32.29435 | 29.64958 | 32.29435 | 37.23094 | 29.55991 |
| 17425123 | Anks6    | ankyrin repeat and sterile alpha motif domain containing 6      | 9.361307 | 9.361307 | 10.1025  | 9.361307 | 7.517641 | 8.657557 |
| 17214433 | Ankzf1   | ankyrin repeat and zinc finger domain containing 1              | 17.09864 | 21.49054 | 23.79885 | 26.04925 | 18.66275 | 21.8668  |
| 17364176 | Ankrd1   | ankyrin repeat domain 1 (cardiac muscle)                        | 8.360852 | 8.761088 | 6.830731 | 6.936751 | 6.261551 | 7.752706 |
| 17507462 | Ankrd10  | ankyrin repeat domain 10                                        | 10.2997  | 10.1579  | 12.53708 | 8.162946 | 9.310315 | 8.956965 |
| 17513835 | Ankrd11  | ankyrin repeat domain 11                                        | 47.75533 | 56.37173 | 53.74654 | 53.07719 | 50.70092 | 49.66439 |
| 17346781 | Ankrd12  | ankyrin repeat domain 12                                        | 13.30245 | 14.31296 | 15.26864 | 10.97531 | 14.09987 | 12.71747 |
| 17361200 | Ankrd13d | ankyrin repeat domain 13 family, member D                       | 6.500136 | 6.504283 | 6.280503 | 6.481735 | 6.448305 | 6.023074 |
| 17440998 | Ankrd13a | ankyrin repeat domain 13a                                       | 56.4202  | 44.6318  | 52.74455 | 49.28306 | 49.34288 | 49.30083 |
| 17266223 | Ankrd13b | ankyrin repeat domain 13b                                       | 28.12946 | 28.56111 | 24.67794 | 26.51671 | 26.94676 | 26.38964 |
| 17403879 | Ankrd13c | ankyrin repeat domain 13c                                       | 86.97869 | 95.1156  | 82.51989 | 100.1126 | 90.59691 | 100.8565 |
| 17367020 | Ankrd16  | ankyrin repeat domain 16                                        | 10.76025 | 14.27937 | 16.67032 | 13.43757 | 14.65783 | 17.54733 |
| 17449526 | Ankrd17  | ankyrin repeat domain 17                                        | 124.3842 | 159.2589 | 149.1738 | 146.3795 | 145.3513 | 146.1859 |
| 17359493 | Ankrd2   | ankyrin repeat domain 2 (stretch responsive muscle)             | 10.16607 | 11.04774 | 13.06378 | 9.130982 | 11.56321 | 16.33019 |
| 17364090 | Ankrd22  | ankyrin repeat domain 22                                        | 2.929877 | 3.072387 | 2.844372 | 3.037849 | 3.253111 | 2.588184 |
| 17222193 | Ankrd23  | ankyrin repeat domain 23                                        | 11.44424 | 8.422801 | 9.310251 | 11.57757 | 9.638108 | 10.21927 |
| 17235792 | Ankrd24  | ankyrin repeat domain 24                                        | 21.47669 | 22.98148 | 21.89197 | 28.02903 | 23.34077 | 23.835   |
| 17470196 | Ankrd26  | ankyrin repeat domain 26                                        | 14.63235 | 11.42174 | 10.1025  | 10.48228 | 8.138766 | 10.48228 |
| 17476819 | Ankrd27  | ankyrin repeat domain 27 (VPS9 domain)                          | 36.85785 | 43.78061 | 49.16126 | 44.5678  | 43.38066 | 38.48782 |
| 17304817 | Ankrd28  | ankyrin repeat domain 28                                        | 52.14185 | 43.24076 | 48.67233 | 55.14507 | 62.88831 | 56.01689 |
| 17352763 | Ankrd29  | ankyrin repeat domain 29                                        | 8.96243  | 9.067092 | 7.738103 | 6.171709 | 7.338779 | 7.222258 |
| 17315124 | Ankrd33  | ankyrin repeat domain 33                                        | 7.544211 | 7.524157 | 7.644065 | 8.509769 | 8.220351 | 7.900533 |

|          |          |                                                                                 |          |          |          |          |          |          |
|----------|----------|---------------------------------------------------------------------------------|----------|----------|----------|----------|----------|----------|
| 17316280 | Ankrd33b | ankyrin repeat domain 33B                                                       | 21.95808 | 23.4317  | 26.03048 | 26.03048 | 25.07243 | 27.57808 |
| 17400617 | Ankrd34a | ankyrin repeat domain 34A                                                       | 5.123501 | 6.733283 | 6.872476 | 6.872476 | 5.171884 | 8.923069 |
| 17289094 | Ankrd34b | ankyrin repeat domain 34B                                                       | 6.624585 | 6.413803 | 6.707755 | 7.140871 | 6.971794 | 6.051866 |
| 17529640 | Ankrd34c | ankyrin repeat domain 34C                                                       | 3.905778 | 2.622313 | 3.062691 | 2.953407 | 2.886037 | 2.936138 |
| 17400682 | Ankrd35  | ankyrin repeat domain 35                                                        | 3.343618 | 3.349115 | 3.592654 | 4.10414  | 2.504426 | 4.353181 |
| 17246980 | Ankrd36  | ankyrin repeat domain 36                                                        | 5.916361 | 5.520121 | 5.918001 | 4.616278 | 6.719202 | 5.093086 |
| 17509139 | Ankrd37  | ankyrin repeat domain 37                                                        | 8.321133 | 8.253351 | 6.365307 | 8.01832  | 10.20794 | 8.321133 |
| 17222205 | Ankrd39  | ankyrin repeat domain 39                                                        | 25.05159 | 28.55517 | 24.85493 | 29.04142 | 27.02776 | 35.74575 |
| 17255215 | Ankrd40  | ankyrin repeat domain 40                                                        | 69.08976 | 69.13144 | 73.88451 | 72.77797 | 69.2163  | 71.15879 |
| 17493312 | Ankrd42  | ankyrin repeat domain 42                                                        | 7.869053 | 6.488972 | 7.709514 | 7.868289 | 7.027249 | 8.392613 |
| 17223169 | Ankrd44  | ankyrin repeat domain 44                                                        | 13.2796  | 19.38193 | 16.10269 | 13.90392 | 17.81845 | 16.10269 |
| 17218694 | Ankrd45  | ankyrin repeat domain 45                                                        | 7.465299 | 9.039669 | 8.340304 | 11.22311 | 8.583643 | 12.56954 |
| 17316495 | Ankrd46  | ankyrin repeat domain 46                                                        | 88.49782 | 88.21793 | 90.09468 | 110.1534 | 76.46089 | 83.17799 |
| 17524087 | Ankrd49  | ankyrin repeat domain 49                                                        | 31.24991 | 27.56107 | 20.92608 | 27.93554 | 30.09684 | 23.00794 |
| 17404947 | Ankrd50  | ankyrin repeat domain 50                                                        | 21.30825 | 22.16129 | 25.29079 | 22.16129 | 19.81801 | 22.16129 |
| 17238449 | Ankrd52  | ankyrin repeat domain 52                                                        | 70.45499 | 54.55388 | 55.07058 | 54.95504 | 56.80476 | 50.43174 |
| 17460124 | Ankrd53  | ankyrin repeat domain 53                                                        | 6.992896 | 7.402692 | 6.024828 | 6.457027 | 7.649153 | 7.94832  |
| 17319109 | Ankrd54  | ankyrin repeat domain 54                                                        | 13.74819 | 18.68774 | 14.18053 | 14.94675 | 13.27785 | 13.83768 |
| 17289864 | Ankrd55  | ankyrin repeat domain 55                                                        | 4.581087 | 4.745631 | 5.10252  | 4.745631 | 4.906622 | 4.548308 |
| 17423756 | Ankrd6   | ankyrin repeat domain 6                                                         | 7.522332 | 9.43361  | 6.818479 | 7.627974 | 6.955528 | 5.499041 |
| 17395099 | Ankrd60  | ankyrin repeat domain 60                                                        | 5.695214 | 5.780603 | 5.649527 | 6.270281 | 6.026707 | 5.453491 |
| 17454897 | Ankrd61  | ankyrin repeat domain 61                                                        | 4.27241  | 3.777522 | 3.743869 | 4.966674 | 4.109178 | 3.550667 |
| 17389736 | Ankrd63  | ankyrin repeat domain 63                                                        | 9.587934 | 10.62418 | 9.454034 | 11.74089 | 10.81484 | 10.62418 |
| 17422691 | Ankrd65  | ankyrin repeat domain 65                                                        | 10.88214 | 12.54456 | 12.79236 | 10.02069 | 7.947769 | 11.24366 |
| 17345085 | Ankrd66  | ankyrin repeat domain 66                                                        | 3.600482 | 4.143012 | 4.764847 | 5.822465 | 4.248637 | 3.809311 |
| 17456293 | Ankrd7   | ankyrin repeat domain 7                                                         | 2.839211 | 2.623586 | 2.669834 | 2.524154 | 3.408436 | 2.37479  |
| 17284049 | Ankrd9   | ankyrin repeat domain 9                                                         | 8.581501 | 7.500777 | 8.06682  | 8.854556 | 9.582685 | 9.310251 |
| 17289396 | Ankra2   | ankyrin repeat, family A (RFXANK-like), 2                                       | 9.538749 | 11.98892 | 13.13296 | 12.90511 | 12.22506 | 14.70658 |
| 17464986 | Asz1     | ankyrin repeat, SAM and basic leucine zipper domain containing 1                | 2.927522 | 2.927522 | 2.501737 | 3.263862 | 2.972692 | 3.612155 |
| 17267667 | Ankfn1   | ankyrin-repeat and fibronectin type III domain containing 1                     | 6.350763 | 4.9909   | 5.373939 | 6.300691 | 4.76313  | 4.958281 |
| 17363407 | Anxa1    | annexin A1                                                                      | 11.62541 | 15.3104  | 15.56831 | 13.77901 | 8.103696 | 12.81481 |
| 17509565 | Anxa10   | annexin A10                                                                     | 2.875175 | 3.54506  | 3.267891 | 3.086667 | 3.283285 | 2.706691 |
| 17297759 | Anxa11   | annexin A11                                                                     | 67.12973 | 74.19705 | 86.71803 | 82.44842 | 60.46926 | 57.2558  |
| 17317284 | Anxa13   | annexin A13                                                                     | 13.44726 | 12.22371 | 13.44362 | 16.48589 | 10.92014 | 13.90672 |
| 17518962 | Anxa2    | annexin A2                                                                      | 27.57387 | 34.24022 | 47.06459 | 28.79268 | 27.44821 | 29.38117 |
| 17439464 | Anxa3    | annexin A3                                                                      | 21.16326 | 23.8246  | 24.70138 | 20.41532 | 18.04541 | 19.19395 |
| 17468551 | Anxa4    | annexin A4                                                                      | 97.78627 | 108.6979 | 96.05175 | 84.57621 | 78.73428 | 90.70625 |
| 17404796 | Anxa5    | annexin A5                                                                      | 262.0648 | 318.9441 | 313.1608 | 282.7748 | 284.7042 | 271.9373 |
| 17262887 | Anxa6    | annexin A6                                                                      | 222.2439 | 225.9814 | 235.3102 | 216.8404 | 176.0669 | 180.8726 |
| 17303804 | Anxa7    | annexin A7                                                                      | 157.2003 | 166.0749 | 162.7327 | 129.9615 | 130.0408 | 146.0016 |
| 17298775 | Anxa8    | annexin A8                                                                      | 5.445823 | 5.688349 | 4.700258 | 4.268059 | 5.284401 | 6.683436 |
| 17407775 | Anxa9    | annexin A9                                                                      | 6.729736 | 4.972599 | 8.538307 | 6.708871 | 9.58149  | 8.690445 |
| 17407794 | Anxa9    | annexin A9                                                                      | 13.524   | 14.37958 | 13.64973 | 14.85699 | 11.19847 | 13.524   |
| 17498467 | Ano1     | anoctamin 1, calcium activated chloride channel                                 | 10.97508 | 9.297159 | 9.133324 | 8.905212 | 8.744161 | 9.891025 |
| 17532418 | Ano10    | anoctamin 10                                                                    | 40.8972  | 44.17934 | 39.46987 | 40.38955 | 40.58374 | 35.238   |
| 17463268 | Ano2     | anoctamin 2                                                                     | 8.286541 | 6.76819  | 5.747761 | 6.943774 | 6.851406 | 6.397552 |
| 17389161 | Ano3     | anoctamin 3                                                                     | 3.045629 | 3.533309 | 3.713501 | 3.520133 | 3.660447 | 3.445516 |
| 17244022 | Ano4     | anoctamin 4                                                                     | 4.474635 | 3.112859 | 2.795856 | 3.430622 | 4.623483 | 3.668881 |
| 17244054 | Ano4     | anoctamin 4                                                                     | 8.117976 | 8.264457 | 8.306784 | 9.128957 | 11.97663 | 9.776174 |
| 17478435 | Ano5     | anoctamin 5                                                                     | 3.348488 | 3.196272 | 3.339703 | 3.484424 | 3.404729 | 3.57405  |
| 17314487 | Ano6     | anoctamin 6                                                                     | 39.84481 | 32.55168 | 44.70084 | 33.32285 | 36.27063 | 32.72248 |
| 17215984 | Ano7     | anoctamin 7                                                                     | 4.362333 | 4.229274 | 5.298816 | 4.818119 | 3.729055 | 4.486561 |
| 17510318 | Ano8     | anoctamin 8                                                                     | 7.881444 | 9.399865 | 8.445366 | 9.322972 | 8.023935 | 10.26976 |
| 17497741 | Ano9     | anoctamin 9                                                                     | 3.248312 | 3.263862 | 3.602204 | 3.196648 | 3.83477  | 3.671857 |
| 17473091 | Amn1     | antagonist of mitotic exit network 1                                            | 24.36114 | 25.30622 | 19.53623 | 19.00622 | 24.99695 | 19.96194 |
| 17275015 | Agr2     | anterior gradient 2                                                             | 2.596467 | 2.998581 | 3.28481  | 2.571571 | 3.339565 | 2.835592 |
| 17275003 | Agr3     | anterior gradient 3                                                             | 1.932596 | 2.27198  | 2.23349  | 2.690678 | 2.468047 | 2.248184 |
| 17228860 | Aph1a    | anterior pharynx defective 1a homolog (C. elegans)                              | 149.2203 | 160.5724 | 159.8129 | 148.0694 | 159.2037 | 137.5355 |
| 17400437 | Aph1a    | anterior pharynx defective 1a homolog (C. elegans)                              | 31.20726 | 33.02782 | 33.02782 | 33.02782 | 36.13788 | 28.76116 |
| 17528377 | Aph1b    | anterior pharynx defective 1b homolog (C. elegans)                              | 14.50502 | 12.41076 | 14.75733 | 11.7139  | 14.31296 | 12.81925 |
| 17528395 | Aph1c    | anterior pharynx defective 1c homolog (C. elegans)                              | 30.29589 | 30.60658 | 39.54737 | 30.22101 | 35.24459 | 34.36124 |
| 17468573 | Antxr1   | anthrax toxin receptor 1                                                        | 15.27161 | 13.72115 | 13.8586  | 11.17134 | 13.65247 | 13.46209 |
| 17449939 | Antxr2   | anthrax toxin receptor 2                                                        | 101.9756 | 106.3414 | 111.3795 | 104.7212 | 81.27163 | 80.31291 |
| 17298757 | Antxr1   | anthrax toxin receptor-like                                                     | 3.808598 | 4.076356 | 4.298967 | 4.076356 | 4.076356 | 4.22649  |
| 17497334 | Mki67    | antigen identified by monoclonal antibody Ki 67                                 | 15.94774 | 15.186   | 20.234   | 15.57435 | 20.70446 | 18.29021 |
| 17324695 | Mfi2     | antigen p97 (melanoma associated) identified by monoclonal antibodies 133.2 anc | 7.295971 | 7.710316 | 6.58681  | 8.02566  | 7.15896  | 7.380252 |
| 17366660 | Kin      | antigenic determinant of rec-A protein                                          | 17.73995 | 22.44559 | 18.41884 | 21.99372 | 22.27757 | 20.14961 |
| 17235456 | Amh      | anti-Mullerian hormone                                                          | 8.105437 | 8.127378 | 8.391275 | 10.64298 | 10.0483  | 8.882095 |
| 17315422 | Amhr2    | anti-Mullerian hormone type 2 receptor                                          | 5.49565  | 7.736923 | 6.812952 | 5.333934 | 5.523758 | 5.226916 |
| 17333307 | Airn     | antisense Igf2r RNA                                                             | 8.83206  | 11.64114 | 11.26582 | 10.25162 | 10.41543 | 7.18023  |
| 17233331 | Asf1a    | anti-silencing function 1A histone chaperone                                    | 33.59303 | 29.34962 | 29.15093 | 28.56388 | 27.95278 | 36.06331 |
| 17503023 | Asf1b    | anti-silencing function 1B histone chaperone                                    | 7.052819 | 7.031585 | 6.425684 | 8.106111 | 5.983792 | 6.856774 |
| 17316700 | Azin1    | antizyme inhibitor 1                                                            | 130.4823 | 126.6761 | 133.6559 | 127.6792 | 126.6541 | 146.7575 |
| 17430288 | Azin2    | antizyme inhibitor 2                                                            | 7.051597 | 8.661819 | 9.118648 | 9.245363 | 8.790468 | 11.59869 |
| 17460468 | Aak1     | AP2 associated kinase 1                                                         | 24.53433 | 25.71717 | 30.14131 | 25.59677 | 24.34663 | 20.26081 |
| 17373721 | Apip     | APAF1 interacting protein                                                       | 25.03683 | 26.62778 | 24.03725 | 27.38986 | 29.91693 | 26.62778 |
| 17543309 | Amer1    | APC membrane recruitment 1                                                      | 14.95743 | 18.21178 | 18.21178 | 13.79066 | 16.71047 | 17.10457 |
| 17301026 | Amer2    | APC membrane recruitment 2                                                      | 5.338965 | 5.300432 | 5.039777 | 5.743022 | 6.758626 | 5.300432 |
| 17211748 | Amer3    | APC membrane recruitment 3                                                      | 5.407006 | 3.906482 | 4.136126 | 4.507852 | 4.231297 | 3.647126 |
| 17541378 | Apln     | apelin                                                                          | 3.400955 | 4.309738 | 4.02439  | 3.315623 | 3.174545 | 2.989678 |
| 17372725 | Aplnr    | apelin receptor                                                                 | 4.965297 | 6.096199 | 4.76564  | 4.544779 | 5.045125 | 5.164111 |
| 17509676 | Apela    | apelin receptor early endogenous ligand                                         | 3.006823 | 2.885757 | 3.107598 | 2.929491 | 3.200573 | 3.051207 |
| 17358664 | A1cf     | APOBEC1 complementation factor                                                  | 676.985  | 563.4056 | 532.726  | 548.516  | 492.4283 | 521.2205 |
| 17516901 | Apoa1    | apolipoprotein A-I                                                              | 2128.896 | 1996.448 | 2006.604 | 2021.429 | 2376.199 | 1902.829 |

|          |         |                                                                               |          |          |          |          |          |          |
|----------|---------|-------------------------------------------------------------------------------|----------|----------|----------|----------|----------|----------|
| 17406656 | Apoa1bp | apolipoprotein A-I binding protein                                            | 146.122  | 154.4033 | 154.8395 | 142.9414 | 172.7617 | 162.6503 |
| 17219242 | Apoa2   | apolipoprotein A-II                                                           | 4335.522 | 4736.843 | 5028.039 | 4739.601 | 4805.897 | 4836.541 |
| 17516908 | Apoa4   | apolipoprotein A-IV                                                           | 1507.675 | 1680.029 | 1974.498 | 1533.497 | 1691.163 | 1189.476 |
| 17516915 | Apoa5   | apolipoprotein A-V                                                            | 212.6667 | 207.4055 | 195.7393 | 206.6965 | 202.2884 | 271.2388 |
| 17273864 | Apob    | apolipoprotein B                                                              | 3920.304 | 4073.604 | 3842.581 | 3617.783 | 3631.601 | 3679.898 |
| 17470580 | Apobec1 | apolipoprotein B mRNA editing enzyme, catalytic polypeptide 1                 | 102.7554 | 77.92585 | 97.61764 | 71.44148 | 76.28936 | 75.67002 |
| 17345797 | Apobec2 | apolipoprotein B mRNA editing enzyme, catalytic polypeptide 2                 | 5.901289 | 6.608441 | 4.920892 | 6.171709 | 5.667608 | 5.571941 |
| 17313050 | Apobec3 | apolipoprotein B mRNA editing enzyme, catalytic polypeptide 3                 | 10.42164 | 11.31175 | 12.88401 | 8.443727 | 7.889479 | 10.2032  |
| 17218249 | Apobec4 | apolipoprotein B mRNA editing enzyme, catalytic polypeptide-like 4 (putative) | 2.961771 | 2.844963 | 2.627134 | 3.01016  | 2.838601 | 2.354744 |
| 17483048 | Apobr   | apolipoprotein B receptor                                                     | 20.30707 | 19.58178 | 23.98233 | 19.2022  | 15.02747 | 16.21155 |
| 17487374 | Apoc1   | apolipoprotein C-I                                                            | 2468.16  | 2477.656 | 2554.473 | 2626.271 | 2670.141 | 2654.749 |
| 17487361 | Apoc2   | apolipoprotein C-II                                                           | 408.1088 | 408.5135 | 482.6956 | 436.1438 | 356.8663 | 418.7223 |
| 17526623 | Apoc3   | apolipoprotein C-III                                                          | 83.01269 | 93.04779 | 105.2583 | 106.8298 | 115.5593 | 118.5301 |
| 17487369 | Apoc4   | apolipoprotein C-IV                                                           | 665.7654 | 911.0649 | 970.9815 | 919.0758 | 1027.705 | 892.6433 |
| 17329759 | Apod    | apolipoprotein D                                                              | 3.462322 | 2.698018 | 3.338801 | 3.823304 | 3.356971 | 3.045354 |
| 17487381 | Apoe    | apolipoprotein E                                                              | 179.9547 | 195.5753 | 218.2957 | 197.9607 | 181.6276 | 197.2894 |
| 17238363 | Apof    | apolipoprotein F                                                              | 737.0456 | 709.2203 | 696.8382 | 724.0071 | 865.914  | 746.1645 |
| 17257743 | Apoh    | apolipoprotein H                                                              | 1488.527 | 1417.359 | 1273.585 | 1347.743 | 1484.036 | 1545.202 |
| 17312661 | Apol10a | apolipoprotein L 10A                                                          | 6.171709 | 5.068891 | 4.035647 | 4.715465 | 4.477396 | 2.953407 |
| 17318807 | Apol10b | apolipoprotein L 10B                                                          | 3.399518 | 3.823755 | 3.15218  | 3.238622 | 4.295541 | 3.1823   |
| 17312669 | Apol11a | apolipoprotein L 11a                                                          | 1.904589 | 2.029452 | 1.957823 | 2.26299  | 1.790509 | 1.994158 |
| 17318815 | Apol11b | apolipoprotein L 11b                                                          | 6.110244 | 5.103758 | 5.740634 | 3.426439 | 5.429277 | 3.285653 |
| 17312637 | Apol6   | apolipoprotein L 6                                                            | 3.935672 | 5.240738 | 3.900016 | 5.076028 | 4.181614 | 4.431669 |
| 17318772 | Apol7a  | apolipoprotein L 7a                                                           | 112.8029 | 109.8667 | 103.9445 | 124.3101 | 113.7135 | 137.7568 |
| 17318787 | Apol7b  | apolipoprotein L 7b                                                           | 26.58517 | 21.31726 | 23.44421 | 30.04306 | 23.40752 | 36.70412 |
| 17318794 | Apol7c  | apolipoprotein L 7c                                                           | 6.739866 | 4.538891 | 4.700649 | 4.617046 | 2.847094 | 5.231664 |
| 17312675 | Gm8221  | apolipoprotein L 7c pseudogene                                                | 3.95827  | 5.107616 | 3.95827  | 4.554492 | 3.29818  | 3.608227 |
| 17214009 | Apol7d  | apolipoprotein L 7d                                                           | 3.579678 | 3.536421 | 3.497539 | 4.059916 | 3.707843 | 4.193021 |
| 17312679 | Apol7e  | apolipoprotein L 7e                                                           | 12.28376 | 14.00636 | 13.39423 | 9.670564 | 14.31296 | 13.56841 |
| 17318822 | Apol8   | apolipoprotein L 8                                                            | 6.429382 | 7.93995  | 5.278983 | 6.429382 | 6.610824 | 9.310251 |
| 17318780 | Apol9a  | apolipoprotein L 9a                                                           | 194.8135 | 139.9182 | 166.8607 | 192.1195 | 139.8387 | 198.8298 |
| 17312686 | Apol9b  | apolipoprotein L 9b                                                           | 367.7827 | 259.4603 | 303.8952 | 345.229  | 274.53   | 322.3089 |
| 17463727 | Apol1d  | apolipoprotein L domain containing 1                                          | 20.17868 | 25.55423 | 17.61009 | 16.08975 | 15.00967 | 15.43764 |
| 17344242 | Apom    | apolipoprotein M                                                              | 134.9246 | 112.6302 | 134.4392 | 145.8913 | 153.8382 | 141.67   |
| 17238359 | Apon    | apolipoprotein N                                                              | 347.8786 | 510.4302 | 591.6786 | 476.9354 | 606.3849 | 466.4375 |
| 17536312 | Apoo    | apolipoprotein O                                                              | 40.04194 | 27.80881 | 27.49448 | 29.49851 | 27.69435 | 21.53498 |
| 17296082 | Apoo-ps | apolipoprotein O, pseudogene                                                  | 96.16433 | 89.30258 | 79.60295 | 106.147  | 51.62257 | 79.34239 |
| 17537248 | Apool   | apolipoprotein O-like                                                         | 70.62514 | 69.4932  | 70.29499 | 65.28366 | 66.80295 | 70.32667 |
| 17279198 | Apopt1  | apoptogenic, mitochondrial 1                                                  | 18.95688 | 17.21256 | 18.94191 | 17.88428 | 21.6762  | 18.95688 |
| 17267021 | Aatf    | apoptosis antagonizing transcription factor                                   | 39.36032 | 38.76116 | 38.76116 | 35.6542  | 42.92005 | 40.35121 |
| 17479303 | Aen     | apoptosis enhancing nuclease                                                  | 21.24719 | 19.42873 | 16.02842 | 25.68546 | 17.11358 | 19.42873 |
| 17388632 | Api5    | apoptosis inhibitor 5                                                         | 105.37   | 76.84609 | 81.6126  | 80.16108 | 88.75152 | 84.43095 |
| 17282611 | Arel1   | apoptosis resistant E3 ubiquitin protein ligase 1                             | 111.8576 | 134.6696 | 122.0239 | 120.2106 | 87.77511 | 103.2909 |
| 17374304 | Aven    | apoptosis, caspase activation inhibitor                                       | 18.68217 | 20.21802 | 14.59447 | 18.7243  | 16.12291 | 20.73419 |
| 17272945 | Aatk    | apoptosis-associated tyrosine kinase                                          | 8.0978   | 8.699787 | 8.949704 | 10.30013 | 8.345162 | 7.396435 |
| 17541417 | Aifm1   | apoptosis-inducing factor, mitochondrion-associated 1                         | 113.9376 | 102.9878 | 103.4895 | 110.9695 | 110.8665 | 111.2375 |
| 17233751 | Aifm2   | apoptosis-inducing factor, mitochondrion-associated 2                         | 31.87846 | 38.51798 | 39.76811 | 39.1489  | 39.12205 | 39.42339 |
| 17323479 | Aifm3   | apoptosis-inducing factor, mitochondrion-associated 3                         | 9.142445 | 10.23685 | 9.432826 | 10.88795 | 9.310251 | 8.877233 |
| 17433029 | Apitd1  | apoptosis-inducing, TAF9-like domain 1                                        | 6.287864 | 7.355177 | 6.287864 | 6.943774 | 6.287864 | 6.287864 |
| 17306440 | Acin1   | apoptotic chromatin condensation inducer 1                                    | 44.08329 | 51.67448 | 52.86973 | 53.49121 | 50.74838 | 53.71712 |
| 17244140 | Apaf1   | apoptotic peptidase activating factor 1                                       | 9.576444 | 11.75693 | 13.52409 | 10.11848 | 11.50086 | 15.09323 |
| 17424042 | Aptx    | aprataxin                                                                     | 12.79165 | 17.95446 | 15.55137 | 15.55137 | 15.30796 | 17.23525 |
| 17468633 | Ap1f    | aprataxin and PNKP like factor                                                | 7.208854 | 7.110544 | 7.208854 | 7.208854 | 7.208854 | 7.643535 |
| 17299542 | Apex1   | apurinic/apyrimidinic endonuclease 1                                          | 36.38066 | 35.67669 | 31.01125 | 35.14141 | 40.83544 | 38.53507 |
| 17545306 | Apex2   | apurinic/apyrimidinic endonuclease 2                                          | 16.61564 | 25.69454 | 18.97016 | 24.84201 | 20.02125 | 24.62787 |
| 17458813 | Aqp1    | aquaporin 1                                                                   | 65.88463 | 49.1991  | 69.92614 | 63.78388 | 31.33102 | 41.13287 |
| 17493461 | Aqp11   | aquaporin 11                                                                  | 78.01394 | 77.4085  | 96.13368 | 91.93103 | 97.15996 | 100.571  |
| 17215879 | Aqp12   | aquaporin 12                                                                  | 7.558395 | 9.761684 | 7.613923 | 7.511026 | 7.180927 | 10.89127 |
| 17314833 | Aqp2    | aquaporin 2                                                                   | 8.15763  | 7.384806 | 10.35561 | 10.71671 | 10.35561 | 8.420524 |
| 17424119 | Aqp3    | aquaporin 3                                                                   | 4.718669 | 6.999054 | 6.322258 | 5.375094 | 5.92995  | 5.773555 |
| 17352862 | Aqp4    | aquaporin 4                                                                   | 17.24636 | 15.61348 | 8.174724 | 13.80798 | 8.67606  | 11.64646 |
| 17314840 | Aqp5    | aquaporin 5                                                                   | 25.18163 | 18.16841 | 18.57165 | 23.19947 | 18.61586 | 20.27542 |
| 17314848 | Aqp6    | aquaporin 6                                                                   | 4.01461  | 4.56296  | 5.098525 | 4.636737 | 4.625919 | 3.542996 |
| 17424105 | Aqp7    | aquaporin 7                                                                   | 15.75535 | 21.99083 | 17.31583 | 17.36523 | 11.83649 | 11.48143 |
| 17482897 | Aqp8    | aquaporin 8                                                                   | 30.4329  | 26.06478 | 23.8279  | 25.22706 | 30.78232 | 33.29838 |
| 17528644 | Aqp9    | aquaporin 9                                                                   | 294.7708 | 292.544  | 273.3452 | 274.1326 | 254.7838 | 257.9379 |
| 17389522 | Aqr     | aquarius                                                                      | 36.6167  | 35.34098 | 39.67147 | 36.32976 | 36.06281 | 33.92296 |
| 17265193 | Alox12  | arachidonate 12-lipoxygenase                                                  | 6.277499 | 6.168501 | 6.752445 | 6.541539 | 6.168501 | 6.457295 |
| 17251583 | Alox12b | arachidonate 12-lipoxygenase, 12R type                                        | 4.178804 | 4.562992 | 5.760923 | 4.574741 | 4.871412 | 4.681043 |
| 17265229 | Alox15  | arachidonate 15-lipoxygenase                                                  | 7.159555 | 8.959573 | 6.909781 | 6.476615 | 7.253463 | 6.540224 |
| 17470031 | Alox5   | arachidonate 5-lipoxygenase                                                   | 4.955017 | 4.535495 | 4.112854 | 4.535495 | 3.72815  | 4.907778 |
| 17444961 | Alox5ap | arachidonate 5-lipoxygenase activating protein                                | 22.77707 | 36.96479 | 33.32147 | 22.73054 | 26.29178 | 27.36291 |
| 17264521 | Alox8   | arachidonate 8-lipoxygenase                                                   | 6.024034 | 6.083831 | 6.830636 | 5.86341  | 7.026323 | 6.46016  |
| 17251565 | Alox3   | arachidonate lipoxygenase 3                                                   | 3.751792 | 3.871573 | 3.600831 | 3.871573 | 3.653654 | 4.147523 |
| 17265211 | Alox12e | arachidonate lipoxygenase, epidermal                                          | 5.680902 | 4.988133 | 5.617429 | 5.357203 | 4.985368 | 5.357203 |
| 17444137 | Amz1    | archaelysin family metallopeptidase 1                                         | 6.013896 | 6.013896 | 6.191504 | 5.862963 | 5.120306 | 7.202262 |
| 17257835 | Amz2    | archaelysin family metallopeptidase 2                                         | 29.88936 | 27.45392 | 26.93126 | 28.46959 | 28.12576 | 29.09441 |
| 17257848 | Amz2    | archaelysin family metallopeptidase 2                                         | 13.63195 | 13.07655 | 14.3521  | 19.39859 | 17.16526 | 15.71467 |
| 17526349 | Arcn1   | archain 1                                                                     | 250.9959 | 205.7103 | 185.4569 | 174.8083 | 214.3969 | 191.9278 |
| 17265030 | Arcap1  | ArfGAP with coiled-coil, ankyrin repeat and PH domains 1                      | 5.379045 | 7.888823 | 6.306283 | 5.808638 | 6.121945 | 6.730343 |
| 17329723 | Acap2   | ArfGAP with coiled-coil, ankyrin repeat and PH domains 2                      | 52.21274 | 47.89058 | 55.46555 | 52.73431 | 44.29248 | 49.87448 |
| 17422785 | Acap3   | ArfGAP with coiled-coil, ankyrin repeat and PH domains 3                      | 10.16607 | 12.13279 | 10.69586 | 12.74094 | 11.75791 | 9.901726 |
| 17454382 | Adap1   | ArfGAP with dual PH domains 1                                                 | 6.316039 | 6.737204 | 7.4144   | 7.4144   | 8.460717 | 6.857867 |
| 17253885 | Adap2   | ArfGAP with dual PH domains 2                                                 | 109.6369 | 115.0016 | 117.6894 | 99.45831 | 80.38364 | 81.01628 |

|          |         |                                                                                |          |          |          |          |          |          |
|----------|---------|--------------------------------------------------------------------------------|----------|----------|----------|----------|----------|----------|
| 17266681 | Adap2os | ArfGAP with dual PH domains 2, opposite strand                                 | 13.14097 | 13.35955 | 14.31723 | 14.22454 | 17.5019  | 13.9549  |
| 17214841 | Agfg1   | ArfGAP with FG repeats 1                                                       | 69.91548 | 73.69475 | 74.18831 | 69.67987 | 65.07674 | 70.39739 |
| 17454121 | Agfg2   | ArfGAP with FG repeats 2                                                       | 59.90523 | 59.46092 | 61.85893 | 59.21866 | 59.24453 | 59.42796 |
| 17215576 | Agap1   | ArfGAP with GTPase domain, ankyrin repeat and PH domain 1                      | 27.97565 | 25.14849 | 34.01573 | 26.2059  | 27.79609 | 22.4666  |
| 17237915 | Agap2   | ArfGAP with GTPase domain, ankyrin repeat and PH domain 2                      | 17.05059 | 20.54677 | 33.38921 | 24.25819 | 14.10026 | 15.70302 |
| 17435380 | Agap3   | ArfGAP with GTPase domain, ankyrin repeat and PH domain 3                      | 34.87303 | 29.46704 | 35.19333 | 33.7611  | 31.98603 | 33.55835 |
| 17480829 | Arap1   | ArfGAP with RhoGAP domain, ankyrin repeat and PH domain 1                      | 35.75542 | 34.11395 | 35.75542 | 38.82274 | 35.99763 | 38.63456 |
| 17448174 | Arap2   | ArfGAP with RhoGAP domain, ankyrin repeat and PH domain 2                      | 43.04787 | 52.71677 | 54.80213 | 50.05388 | 51.32856 | 37.99822 |
| 17353881 | Arap3   | ArfGAP with RhoGAP domain, ankyrin repeat and PH domain 3                      | 19.60881 | 16.35489 | 23.19256 | 20.80531 | 18.66224 | 17.38643 |
| 17274415 | Asap2   | ArfGAP with SH3 domain, ankyrin repeat and PH domain 2                         | 25.58418 | 25.96111 | 23.05504 | 31.14006 | 27.56623 | 27.88196 |
| 17420036 | Asap3   | ArfGAP with SH3 domain, ankyrin repeat and PH domain 3                         | 29.79999 | 27.10487 | 21.5535  | 29.10227 | 22.4305  | 22.61221 |
| 17317500 | Asap1   | ArfGAP with SH3 domain, ankyrin repeat and PH domain1                          | 65.70585 | 67.52782 | 95.25811 | 61.45975 | 58.79738 | 67.42585 |
| 17239546 | Arfgef3 | ARFGEF family member 3                                                         | 6.965756 | 7.990357 | 8.038186 | 6.504779 | 6.992896 | 8.093704 |
| 17276776 | Arg2    | arginase type II                                                               | 4.512979 | 5.036355 | 4.580643 | 5.243645 | 6.790181 | 5.980019 |
| 17239845 | Arg1    | arginase, liver                                                                | 811.6815 | 981.5242 | 1122.142 | 1107.553 | 1207.485 | 1227.587 |
| 17507333 | Arglu1  | arginine and glutamate rich 1                                                  | 49.65889 | 54.06264 | 51.43684 | 62.13826 | 57.07947 | 56.34517 |
| 17421928 | Rere    | arginine glutamic acid dipeptide (RE) repeats                                  | 41.04743 | 40.96018 | 45.19214 | 45.36507 | 38.22382 | 41.80982 |
| 17391665 | Avp     | arginine vasopressin                                                           | 12.36628 | 17.36644 | 17.77811 | 15.58148 | 15.27372 | 18.66832 |
| 17237762 | Avpr1a  | arginine vasopressin receptor 1A                                               | 39.241   | 19.56672 | 12.67163 | 31.65058 | 35.75889 | 22.29657 |
| 17217030 | Avpr1b  | arginine vasopressin receptor 1B                                               | 3.332373 | 2.550694 | 3.364752 | 3.633072 | 2.530005 | 2.712099 |
| 17535712 | Avpr2   | arginine vasopressin receptor 2                                                | 8.726058 | 10.14636 | 9.470956 | 11.22373 | 7.620153 | 10.1996  |
| 17364813 | Avpi1   | arginine vasopressin-induced 1                                                 | 28.48321 | 30.23107 | 28.93533 | 32.63459 | 29.65842 | 30.23107 |
| 17419812 | Rsrp1   | arginine/serine rich protein 1                                                 | 176.8583 | 228.9597 | 224.0846 | 213.4405 | 217.6626 | 281.4803 |
| 17398121 | Rsrc1   | arginine/serine-rich coiled-coil 1                                             | 15.15782 | 15.85537 | 17.05414 | 17.80314 | 15.7053  | 18.57693 |
| 17452689 | Rsrc2   | arginine/serine-rich coiled-coil 2                                             | 23.3563  | 27.04725 | 27.71798 | 27.96654 | 29.67014 | 28.01621 |
| 17453179 | Asl     | argininosuccinate lyase                                                        | 438.1983 | 449.7408 | 552.561  | 647.2728 | 561.6276 | 565.4948 |
| 17233769 | Gm5424  | argininosuccinate synthase pseudogene                                          | 1009.265 | 1018.853 | 1013.029 | 1135.892 | 1003.761 | 1244.767 |
| 17369487 | Ass1    | argininosuccinate synthetase 1                                                 | 21.47878 | 22.30044 | 21.40462 | 18.24223 | 17.6063  | 29.01908 |
| 17227278 | Rnpep   | arginyl aminopeptidase (aminopeptidase B)                                      | 44.97402 | 37.17652 | 39.45401 | 41.85651 | 33.73888 | 37.13841 |
| 17215839 | Rnpepl1 | arginyl aminopeptidase (aminopeptidase B)-like 1                               | 90.41436 | 98.89461 | 103.2824 | 87.59278 | 85.06478 | 83.09329 |
| 17496973 | Ate1    | arginyltransferase 1                                                           | 45.80236 | 37.24565 | 35.89572 | 40.43885 | 37.24565 | 35.26634 |
| 17261730 | Rars    | arginyl-tRNA synthetase                                                        | 91.29665 | 76.43863 | 72.48045 | 77.59437 | 80.79309 | 69.09934 |
| 17412653 | Rars2   | arginyl-tRNA synthetase 2, mitochondrial                                       | 30.12355 | 26.15618 | 25.72983 | 30.33644 | 26.46713 | 30.45506 |
| 17430080 | Ago1    | argonaute RISC catalytic subunit 1                                             | 23.9345  | 21.20834 | 22.54976 | 19.74301 | 24.92584 | 19.42968 |
| 17317837 | Ago2    | argonaute RISC catalytic subunit 2                                             | 51.82046 | 69.20335 | 80.51692 | 70.49456 | 73.08381 | 60.82785 |
| 17430052 | Ago3    | argonaute RISC catalytic subunit 3                                             | 39.1028  | 37.42006 | 37.02685 | 28.98571 | 25.67887 | 34.7895  |
| 17430103 | Ago4    | argonaute RISC catalytic subunit 4                                             | 7.371049 | 7.370589 | 7.755501 | 5.747601 | 6.228738 | 6.587815 |
| 17531238 | Arih2   | ariadne homolog 2 (Drosophila)                                                 | 103.6783 | 102.3388 | 103.9467 | 103.2609 | 112.8787 | 89.38619 |
| 17527787 | Arih1   | ariadne ubiquitin-conjugating enzyme E2 binding protein homolog 1 (Drosophila) | 141.562  | 127.8936 | 123.2591 | 121.4737 | 111.9942 | 121.0064 |
| 17536254 | Arx     | aristaless related homeobox                                                    | 18.93574 | 19.4507  | 15.18316 | 18.35575 | 19.92434 | 19.6578  |
| 17401578 | Alx3    | aristaless-like homeobox 3                                                     | 12.02304 | 10.79364 | 12.62297 | 12.43591 | 13.42053 | 11.69768 |
| 17373585 | Alx4    | aristaless-like homeobox 4                                                     | 12.107   | 10.09333 | 9.403449 | 15.93801 | 9.2931   | 10.29855 |
| 17404259 | Armc1   | armadillo repeat containing 1                                                  | 94.96079 | 62.33671 | 58.53429 | 79.03556 | 79.79796 | 77.68693 |
| 17435116 | Armc10  | armadillo repeat containing 10                                                 | 19.70009 | 20.39636 | 19.70009 | 17.68017 | 19.70009 | 24.68632 |
| 17335344 | Armc12  | armadillo repeat containing 12                                                 | 3.491532 | 4.150773 | 3.256518 | 3.937282 | 3.85457  | 3.173841 |
| 17240502 | Armc2   | armadillo repeat containing 2                                                  | 4.795064 | 5.166474 | 4.071979 | 4.659354 | 4.681043 | 4.486685 |
| 17367338 | Armc3   | armadillo repeat containing 3                                                  | 3.354575 | 3.292515 | 3.339703 | 3.466308 | 3.292515 | 3.292515 |
| 17352527 | Armc4   | armadillo repeat containing 4                                                  | 5.062325 | 4.4983   | 5.062325 | 6.221748 | 5.062325 | 5.062325 |
| 17483687 | Armc5   | armadillo repeat containing 5                                                  | 21.63012 | 24.11836 | 23.46584 | 21.29481 | 17.62376 | 21.29481 |
| 17509985 | Armc6   | armadillo repeat containing 6                                                  | 8.148531 | 8.662299 | 8.285392 | 9.259537 | 9.359296 | 10.18808 |
| 17258230 | Armc7   | armadillo repeat containing 7                                                  | 15.29661 | 16.57067 | 20.06793 | 11.86031 | 7.806685 | 14.63327 |
| 17530069 | Armc8   | armadillo repeat containing 8                                                  | 28.6045  | 36.25656 | 33.14249 | 35.5173  | 35.23214 | 33.43483 |
| 17215067 | Armc9   | armadillo repeat containing 9                                                  | 11.6122  | 13.27601 | 13.83653 | 9.831694 | 12.64601 | 13.91491 |
| 17537742 | Armcx1  | armadillo repeat containing, X-linked 1                                        | 7.879095 | 8.171721 | 8.352106 | 6.507665 | 7.49506  | 7.918735 |
| 17544545 | Armcx2  | armadillo repeat containing, X-linked 2                                        | 4.759632 | 6.241142 | 5.579052 | 4.990416 | 5.036355 | 3.995926 |
| 17537756 | Armcx3  | armadillo repeat containing, X-linked 3                                        | 31.01426 | 28.65232 | 26.84702 | 26.84702 | 26.84702 | 26.40941 |
| 17537730 | Armcx4  | armadillo repeat containing, X-linked 4                                        | 8.134028 | 7.630037 | 8.442615 | 8.306841 | 7.746744 | 6.224595 |
| 17544535 | Armcx6  | armadillo repeat containing, X-linked 6                                        | 7.533081 | 5.888173 | 6.340383 | 5.207244 | 4.315806 | 5.949465 |
| 17323675 | Arvcf   | armadillo repeat gene deleted in velo-cardio-facial syndrome                   | 14.56557 | 15.37559 | 12.0739  | 14.96915 | 15.08027 | 12.1243  |
| 17365384 | Actr1a  | ARP1 actin-related protein 1A, centractin alpha                                | 108.168  | 94.48478 | 88.2161  | 105.9221 | 90.53477 | 86.66334 |
| 17222256 | Actr1b  | ARP1 actin-related protein 1B, centractin beta                                 | 67.29465 | 47.70042 | 56.0946  | 57.92483 | 44.68349 | 56.0946  |
| 17276040 | Actr10  | ARP10 actin-related protein 10                                                 | 90.71945 | 68.23311 | 59.61072 | 77.48311 | 67.71014 | 68.99644 |
| 17260839 | Actr2   | ARP2 actin-related protein 2                                                   | 310.2979 | 319.0193 | 286.754  | 266.9711 | 255.9414 | 294.1911 |
| 17226420 | Actr3   | ARP3 actin-related protein 3                                                   | 237.557  | 195.4262 | 201.4224 | 208.2944 | 202.926  | 202.2982 |
| 17435505 | Actr3b  | ARP3 actin-related protein 3B                                                  | 2.954348 | 3.132555 | 3.252232 | 3.211372 | 3.428007 | 3.476149 |
| 17378929 | Actr5   | ARP5 actin-related protein 5                                                   | 16.3702  | 14.35479 | 13.94958 | 13.90036 | 14.1825  | 13.15136 |
| 17244126 | Actr6   | ARP6 actin-related protein 6                                                   | 26.08629 | 28.4769  | 21.28817 | 33.69494 | 34.09315 | 36.22591 |
| 17298139 | Actr8   | ARP8 actin-related protein 8                                                   | 66.77009 | 60.1991  | 58.43821 | 58.71023 | 57.65485 | 60.04158 |
| 17536548 | Arr3    | arrestin 3, retinal                                                            | 3.432001 | 3.515452 | 3.786251 | 4.240605 | 3.223147 | 3.701038 |
| 17382335 | Arrdc1  | arrestin domain containing 1                                                   | 6.093833 | 8.474217 | 7.226114 | 7.207006 | 6.659944 | 7.32973  |
| 17510200 | Arrdc2  | arrestin domain containing 2                                                   | 17.69954 | 21.82394 | 20.84067 | 19.12543 | 25.91382 | 17.22868 |
| 17288876 | Arrdc3  | arrestin domain containing 3                                                   | 131.6615 | 121.3853 | 354.0281 | 249.5889 | 281.7672 | 262.8599 |
| 17492051 | Arrdc4  | arrestin domain containing 4                                                   | 45.09451 | 44.76161 | 54.31542 | 38.35333 | 53.59922 | 50.48315 |
| 17346226 | Arrdc5  | arrestin domain containing 5                                                   | 4.89816  | 4.417561 | 4.044048 | 5.42262  | 4.86072  | 4.732951 |
| 17480568 | Arrb1   | arrestin, beta 1                                                               | 31.92113 | 32.30174 | 43.09385 | 32.72474 | 26.63774 | 25.52095 |
| 17252013 | Arrb2   | arrestin, beta 2                                                               | 22.4403  | 31.54261 | 38.31719 | 34.82521 | 30.55867 | 32.6165  |
| 17511277 | Asna1   | arsA arsenite transporter, ATP-binding, homolog 1 (bacterial)                  | 60.87298 | 58.07317 | 66.03459 | 54.52402 | 49.50423 | 52.94601 |
| 17360084 | As3mt   | arsenic (+3 oxidation state) methyltransferase                                 | 92.21503 | 92.31736 | 106.7491 | 101.0426 | 100.7628 | 87.76112 |
| 17428996 | Artn    | artemin                                                                        | 6.621325 | 5.198336 | 5.120732 | 4.20927  | 4.768746 | 5.2036   |
| 17506800 | Arv1    | ARV1 homolog (yeast)                                                           | 4.666432 | 11.79497 | 8.297059 | 10.19175 | 8.247404 | 9.482122 |
| 17400339 | Arnt    | aryl hydrocarbon receptor nuclear translocator                                 | 68.87746 | 83.69213 | 96.82448 | 84.18026 | 73.58093 | 70.82761 |
| 17492985 | Arnt2   | aryl hydrocarbon receptor nuclear translocator 2                               | 6.078688 | 6.933332 | 7.639933 | 7.319576 | 8.978286 | 7.614293 |
| 17481960 | Arntl   | aryl hydrocarbon receptor nuclear translocator-like                            | 62.80554 | 35.6856  | 27.37866 | 49.03636 | 29.81115 | 30.05369 |
| 17464331 | Arntl2  | aryl hydrocarbon receptor nuclear translocator-like 2                          | 7.281169 | 8.828388 | 9.908935 | 9.907149 | 10.71426 | 8.594001 |

|          |            |                                                                                 |          |          |          |          |          |          |
|----------|------------|---------------------------------------------------------------------------------|----------|----------|----------|----------|----------|----------|
| 17265560 | Aipl1      | aryl hydrocarbon receptor-interacting protein-like 1                            | 7.690461 | 7.437821 | 7.476743 | 7.942317 | 8.408859 | 7.89692  |
| 17397923 | Aadac      | arylacetamide deacetylase (esterase)                                            | 693.8548 | 447.7936 | 341.2961 | 481.4126 | 554.7216 | 659.2674 |
| 17397915 | Aadac12    | arylacetamide deacetylase-like 2                                                | 2.39164  | 2.215542 | 2.73444  | 2.320957 | 3.160231 | 2.429602 |
| 17397907 | Gm9696     | arylacetamide deacetylase-like 2 pseudogene                                     | 2.148366 | 2.158816 | 1.933843 | 2.708267 | 2.309531 | 1.926684 |
| 17432565 | Aadac13    | arylacetamide deacetylase-like 3                                                | 3.10734  | 3.263862 | 3.64753  | 3.366805 | 4.798355 | 3.07763  |
| 17258604 | Aanat      | arylalkylamine N-acetyltransferase                                              | 5.946291 | 5.120306 | 5.481573 | 5.05433  | 4.521213 | 5.334008 |
| 17258851 | Afmid      | arylformamidase                                                                 | 141.2718 | 167.699  | 166.2165 | 226.4063 | 186.9048 | 217.6792 |
| 17280729 | Ahr        | aryl-hydrocarbon receptor                                                       | 89.26298 | 121.7704 | 110.2168 | 116.5407 | 128.1607 | 142.5209 |
| 17294352 | Ahrr       | aryl-hydrocarbon receptor repressor                                             | 4.955979 | 5.300432 | 5.300432 | 4.991384 | 5.300432 | 5.961643 |
| 17361099 | Aip        | aryl-hydrocarbon receptor-interacting protein                                   | 22.26491 | 24.23517 | 21.8465  | 23.52561 | 20.03124 | 21.8465  |
| 17320538 | Arsa       | arylsulfatase A                                                                 | 37.14948 | 53.42896 | 42.69899 | 46.75439 | 31.27331 | 31.15496 |
| 17289181 | Arsb       | arylsulfatase B                                                                 | 93.2932  | 79.08324 | 79.08324 | 72.63082 | 83.52985 | 84.48539 |
| 17257852 | ArsG       | arylsulfatase G                                                                 | 25.3278  | 24.09831 | 20.80618 | 24.61627 | 27.64564 | 23.42131 |
| 17350996 | Arsi       | arylsulfatase i                                                                 | 10.13841 | 8.76613  | 9.068664 | 10.97995 | 6.876145 | 8.683099 |
| 17402433 | Arsj       | arylsulfatase J                                                                 | 6.786793 | 4.381546 | 5.522571 | 6.943774 | 5.364486 | 5.776838 |
| 17294489 | Arsk       | arylsulfatase K                                                                 | 19.28664 | 16.87084 | 19.84715 | 15.5845  | 14.50482 | 18.35206 |
| 17399237 | Ash1l      | ash1 (absent, small, or homeotic)-like (Drosophila)                             | 54.21312 | 79.09804 | 74.70744 | 64.34696 | 70.62563 | 85.16684 |
| 17508423 | Ash2l      | ash2 (absent, small, or homeotic)-like (Drosophila)                             | 43.96123 | 41.39544 | 39.50217 | 40.72125 | 34.10497 | 40.72125 |
| 17251933 | Asgr1      | asialoglycoprotein receptor 1                                                   | 300.6331 | 303.0559 | 266.862  | 304.2851 | 328.6162 | 304.2451 |
| 17251947 | Asgr2      | asialoglycoprotein receptor 2                                                   | 240.8615 | 218.1702 | 206.3358 | 214.7419 | 268.6344 | 235.0282 |
| 17217914 | Aspm       | asp (abnormal spindle)-like, microcephaly associated (Drosophila)               | 5.023142 | 5.907223 | 4.900877 | 4.51949  | 4.917653 | 4.701594 |
| 17279277 | Aspg       | asparaginase homolog (S. cerevisiae)                                            | 85.99435 | 91.54632 | 84.66654 | 90.16527 | 84.51292 | 100.3301 |
| 17362544 | Asrgl1     | asparaginase like 1                                                             | 21.96295 | 21.36711 | 19.82433 | 20.49955 | 17.10742 | 22.95203 |
| 17464718 | Asns       | asparagine synthetase                                                           | 16.16868 | 13.34808 | 13.37846 | 16.29582 | 15.85197 | 13.82177 |
| 17222988 | Asnsd1     | asparagine synthetase domain containing 1                                       | 39.86249 | 42.75259 | 42.75259 | 42.75259 | 42.75259 | 47.94339 |
| 17322682 | Alg1       | asparagine-linked glycosylation 1 (beta-1,4-mannosyltransferase)                | 37.34362 | 40.05027 | 46.04109 | 46.13821 | 40.43576 | 41.58064 |
| 17314233 | Alg10b     | asparagine-linked glycosylation 10B (alpha-1,2-glucosyltransferase)             | 64.7079  | 54.52175 | 37.02788 | 46.6411  | 47.61519 | 45.77919 |
| 17499849 | Alg11      | asparagine-linked glycosylation 11 (alpha-1,2-mannosyltransferase)              | 65.01587 | 63.20689 | 55.14775 | 59.00642 | 52.84298 | 68.87746 |
| 17320189 | Alg12      | asparagine-linked glycosylation 12 (alpha-1,6-mannosyltransferase)              | 50.46461 | 29.82231 | 35.35568 | 28.70798 | 27.04725 | 24.57296 |
| 17538356 | Alg13      | asparagine-linked glycosylation 13                                              | 12.35189 | 12.26929 | 12.50489 | 12.50489 | 12.35189 | 11.63638 |
| 17402146 | Alg14      | asparagine-linked glycosylation 14                                              | 105.5052 | 84.98639 | 76.22752 | 81.59507 | 58.71145 | 66.94572 |
| 17425151 | Alg2       | asparagine-linked glycosylation 2 (alpha-1,3-mannosyltransferase)               | 43.97129 | 26.53823 | 32.59955 | 29.81239 | 27.747   | 26.86433 |
| 17329151 | Alg3       | asparagine-linked glycosylation 3 (alpha-1,3-mannosyltransferase)               | 54.56561 | 57.03952 | 63.19331 | 53.74021 | 45.57687 | 42.68922 |
| 17397632 | Alg5       | asparagine-linked glycosylation 5 (dolichyl-phosphate beta-glucosyltransferase) | 70.57572 | 93.51397 | 89.86516 | 81.1208  | 92.70852 | 89.37132 |
| 17415778 | Alg6       | asparagine-linked glycosylation 6 (alpha-1,3,-glucosyltransferase)              | 11.87734 | 13.91376 | 10.46906 | 13.21404 | 10.6244  | 10.29855 |
| 17480327 | Alg8       | asparagine-linked glycosylation 8 (alpha-1,3-glucosyltransferase)               | 45.29218 | 47.26204 | 52.66162 | 36.49255 | 48.56079 | 53.70334 |
| 17517151 | Alg9       | asparagine-linked glycosylation 9 (alpha 1,2 mannosyltransferase)               | 31.74396 | 28.85881 | 27.19708 | 29.77274 | 30.72136 | 27.71644 |
| 17355009 | Nars       | asparaginy1-tRNA synthetase                                                     | 244.4592 | 201.0416 | 183.3403 | 182.6009 | 203.9356 | 162.8579 |
| 17480292 | Nars2      | asparaginy1-tRNA synthetase 2 (mitochondrial)(putative)                         | 44.49373 | 28.95218 | 26.25372 | 31.80254 | 29.33416 | 26.39715 |
| 17496492 | Asphd1     | aspartate beta-hydroxylase domain containing 1                                  | 6.258296 | 6.954805 | 10.24423 | 5.971486 | 6.258296 | 7.824779 |
| 17451217 | Asphd2     | aspartate beta-hydroxylase domain containing 2                                  | 10.15811 | 5.863817 | 6.676722 | 6.769926 | 6.773399 | 6.773399 |
| 17477475 | Aspdh      | aspartate dehydrogenase domain containing                                       | 69.89222 | 81.88629 | 95.93331 | 93.07424 | 85.21113 | 91.66188 |
| 17423146 | Asph       | aspartate-beta-hydroxylase                                                      | 34.58393 | 31.1118  | 29.35511 | 27.79339 | 32.8675  | 32.31092 |
| 17460465 | Asprv1     | aspartic peptidase, retroviral-like 1                                           | 4.070878 | 5.396448 | 5.717403 | 4.45937  | 3.492451 | 4.40762  |
| 17265748 | Aspa       | aspartoacylase                                                                  | 29.64465 | 22.00653 | 33.63497 | 25.71717 | 25.82936 | 30.14925 |
| 17356041 | Acy3       | aspartoacylase (aminoacylase) 3                                                 | 165.8529 | 184.0278 | 180.2106 | 182.214  | 150.4041 | 184.2499 |
| 17224587 | Dnpep      | aspartyl aminopeptidase                                                         | 64.42997 | 58.92059 | 63.27396 | 57.71442 | 63.27396 | 63.27396 |
| 17501148 | Aga        | aspartylglucosaminidase                                                         | 53.03931 | 48.58739 | 54.30865 | 46.1782  | 51.99569 | 54.90973 |
| 17226572 | Dars       | aspartyl-tRNA synthetase                                                        | 132.8892 | 119.9284 | 100.098  | 128.4123 | 112.0074 | 124.6501 |
| 17228804 | Dars2      | aspartyl-tRNA synthetase 2 (mitochondrial)                                      | 31.10576 | 30.10268 | 30.64819 | 29.21303 | 29.19704 | 29.99978 |
| 17287160 | Aspn       | asporin                                                                         | 3.313601 | 2.335838 | 2.577246 | 2.805912 | 3.130255 | 2.278462 |
| 17375866 | Astl       | astacin-like metalloendopeptidase (M12 family)                                  | 6.064253 | 5.765517 | 5.706713 | 5.294227 | 5.412631 | 4.756664 |
| 17521091 | Aste1      | asteroid homolog 1 (Drosophila)                                                 | 16.79454 | 22.1444  | 18.16941 | 15.60136 | 18.60928 | 25.81576 |
| 17218514 | Astn1      | astrotactin 1                                                                   | 7.347788 | 7.701449 | 7.570193 | 7.654616 | 7.632258 | 8.826613 |
| 17426402 | Astn2      | astrotactin 2                                                                   | 14.29016 | 19.21206 | 17.30564 | 18.04053 | 16.23246 | 17.30564 |
| 17472847 | Asun       | asunder, spermatogenesis regulator                                              | 72.00374 | 63.61389 | 60.2964  | 62.1904  | 61.06484 | 66.3337  |
| 17230345 | Ahctf1     | AT hook containing transcription factor 1                                       | 42.23333 | 39.94713 | 36.20959 | 40.44642 | 37.29447 | 36.20959 |
| 17419500 | Ahdcl1     | AT hook, DNA binding motif, containing 1                                        | 16.58135 | 20.1619  | 16.69947 | 21.56665 | 19.48632 | 23.14582 |
| 17431075 | Arid1a     | AT rich interactive domain 1A (SWI-like)                                        | 72.32939 | 78.59905 | 81.28572 | 64.65276 | 64.72181 | 76.22805 |
| 17332739 | Arid1b     | AT rich interactive domain 1B (SWI-like)                                        | 65.1196  | 69.66441 | 83.22702 | 77.57823 | 76.09449 | 69.97851 |
| 17314515 | Arid2      | AT rich interactive domain 2 (ARID, RFX-like)                                   | 63.43205 | 69.86849 | 70.1728  | 68.09562 | 65.91249 | 78.50486 |
| 17235037 | Arid3a     | AT rich interactive domain 3A (BRIGHT-like)                                     | 9.666476 | 11.09317 | 8.064472 | 9.709116 | 6.832152 | 8.561835 |
| 17527606 | Arid3b     | AT rich interactive domain 3B (BRIGHT-like)                                     | 10.61005 | 15.44417 | 12.17517 | 12.35189 | 12.168   | 12.35189 |
| 17424309 | Arid3c     | AT rich interactive domain 3C (BRIGHT-like)                                     | 10.34979 | 12.65451 | 11.99341 | 11.70319 | 11.50014 | 15.66008 |
| 17276070 | Arid4a     | AT rich interactive domain 4A (RBP1-like)                                       | 32.05994 | 37.90431 | 33.55603 | 37.06203 | 38.72169 | 35.10172 |
| 17285347 | Arid4b     | AT rich interactive domain 4B (RBP1-like)                                       | 31.81488 | 35.5683  | 30.18375 | 32.71545 | 30.18375 | 32.3636  |
| 17211795 | Arid5a     | AT rich interactive domain 5A (MRF1-like)                                       | 7.300777 | 7.337456 | 6.906573 | 9.157159 | 6.803702 | 7.337456 |
| 17241660 | Arid5b     | AT rich interactive domain 5B (MRF1-like)                                       | 172.4459 | 166.0703 | 175.6476 | 109.1728 | 133.7885 | 147.1884 |
| 17520439 | Atr        | ataxia telangiectasia and Rad3 related                                          | 18.07921 | 15.68159 | 13.58432 | 19.99143 | 20.68711 | 16.84467 |
| 17520490 | Atr        | ataxia telangiectasia and Rad3 related                                          | 4.8239   | 5.55351  | 4.753631 | 5.056819 | 6.899778 | 5.361252 |
| 17527054 | Atm        | ataxia telangiectasia mutated                                                   | 24.67965 | 23.73214 | 16.63661 | 24.56121 | 21.26634 | 26.54761 |
| 17243229 | Atcay      | ataxia, cerebellar, Cayman type homolog (human)                                 | 6.287864 | 6.169699 | 5.594852 | 6.287864 | 6.331556 | 6.287864 |
| 17235597 | Atcayos    | ataxia, cerebellar, Cayman type homolog (human), opposite strand                | 7.698994 | 7.698994 | 7.698994 | 7.815727 | 6.721811 | 7.763461 |
| 17292174 | Atxn1      | ataxin 1                                                                        | 71.32075 | 80.4115  | 82.19963 | 92.20672 | 81.72412 | 76.54679 |
| 17313836 | Atxn10     | ataxin 10                                                                       | 227.1765 | 212.0043 | 223.0278 | 219.8781 | 232.4634 | 220.4335 |
| 17512846 | Atxn1l     | ataxin 1-like                                                                   | 38.13701 | 40.12335 | 31.02243 | 42.54418 | 42.965   | 44.66089 |
| 17441968 | Atxn2      | ataxin 2                                                                        | 158.3354 | 195.4452 | 216.1981 | 188.1644 | 138.2025 | 181.5647 |
| 17496253 | Atxn2l     | ataxin 2-like                                                                   | 80.72424 | 89.8253  | 99.23176 | 76.23175 | 87.60614 | 75.73299 |
| 17283422 | Atxn3      | ataxin 3                                                                        | 34.09835 | 42.66585 | 39.91115 | 44.4478  | 39.91115 | 41.56306 |
| 17297196 | Atxn7      | ataxin 7                                                                        | 47.0235  | 45.44753 | 48.04652 | 46.46266 | 47.07894 | 44.01429 |
| 17274911 | Atxn7l1    | ataxin 7-like 1                                                                 | 14.37978 | 15.52025 | 16.35239 | 15.66453 | 12.53856 | 15.56302 |
| 17274919 | Atxn7l1    | ataxin 7-like 1                                                                 | 13.13132 | 16.40291 | 17.47984 | 16.16263 | 14.68631 | 19.17441 |
| 17274940 | Atxn7l1    | ataxin 7-like 1                                                                 | 48.58032 | 33.64476 | 47.96101 | 59.95591 | 42.728   | 57.51475 |
| 17280677 | Atxn7l1os1 | ataxin 7-like 1, opposite strand 1 [Source:MGI Symbol;Acc:MGI:3779275]          | 2.513347 | 2.215097 | 2.481049 | 2.513347 | 2.513347 | 2.379799 |

|          |            |                                                                                 |          |          |          |          |          |          |
|----------|------------|---------------------------------------------------------------------------------|----------|----------|----------|----------|----------|----------|
| 17280682 | Atxn711os2 | ataxin 7-like 1, opposite strand 2                                              | 6.949215 | 8.939722 | 11.73609 | 9.298577 | 9.190861 | 9.606161 |
| 17409243 | Atxn7l2    | ataxin 7-like 2                                                                 | 5.843489 | 12.41481 | 8.636938 | 10.56141 | 9.046314 | 10.27616 |
| 17270118 | Atxn7l3    | ataxin 7-like 3                                                                 | 21.19585 | 19.98077 | 21.16033 | 20.77606 | 24.37178 | 24.05942 |
| 17244967 | Atxn7l3b   | ataxin 7-like 3B                                                                | 150.101  | 167.4945 | 156.5869 | 146.1423 | 175.9998 | 169.5997 |
| 17484682 | Athl1      | ATH1, acid trehalase-like 1 (yeast)                                             | 35.1246  | 38.70532 | 35.48383 | 35.3209  | 34.32481 | 30.87913 |
| 17426277 | Akna       | AT-hook transcription factor                                                    | 11.781   | 12.26079 | 13.90055 | 12.30958 | 12.26079 | 15.11868 |
| 17414756 | Aknaos     | AT-hook transcription factor, opposite strand                                   | 3.779722 | 4.129222 | 4.124445 | 4.117104 | 3.791976 | 4.147408 |
| 17275955 | Atl1       | atlastin GTPase 1                                                               | 7.47892  | 8.074819 | 7.22366  | 7.148695 | 7.108918 | 7.424326 |
| 17347457 | Atl2       | atlastin GTPase 2                                                               | 176.2256 | 232.0095 | 222.688  | 216.0648 | 190.3895 | 215.8672 |
| 17357054 | Atl3       | atlastin GTPase 3                                                               | 187.6707 | 173.3495 | 156.3191 | 171.1384 | 176.1817 | 183.184  |
| 17505927 | Atmin      | ATM interactor                                                                  | 24.21753 | 21.82788 | 23.99547 | 23.96405 | 27.67862 | 23.90284 |
| 17459153 | Atoh1      | atonal homolog 1 (Drosophila)                                                   | 7.086926 | 7.399511 | 7.870689 | 7.548343 | 5.079125 | 7.126185 |
| 17233886 | Atoh7      | atonal homolog 7 (Drosophila)                                                   | 16.03564 | 10.96535 | 12.50601 | 17.92362 | 13.67311 | 14.07663 |
| 17467706 | Atoh8      | atonal homolog 8 (Drosophila)                                                   | 33.08373 | 37.01274 | 40.02862 | 41.26281 | 50.17894 | 51.37947 |
| 17269521 | Acly       | ATP citrate lyase                                                               | 197.7755 | 144.2323 | 169.292  | 152.4064 | 189.0259 | 162.1314 |
| 17221873 | ATP8       | ATP synthase F0 subunit 8                                                       | 5482.127 | 5497.538 | 5311.082 | 5662.761 | 5373.29  | 5688.726 |
| 17532617 | ATP8       | ATP synthase F0 subunit 8                                                       | 4619.497 | 4471.552 | 4461.057 | 4612.298 | 4551.385 | 4820.376 |
| 17417290 | Atpaf1     | ATP synthase mitochondrial F1 complex assembly factor 1                         | 37.32111 | 39.62777 | 41.01927 | 42.45022 | 40.89918 | 42.63156 |
| 17263594 | Atpaf2     | ATP synthase mitochondrial F1 complex assembly factor 2                         | 39.92526 | 46.41824 | 42.24357 | 48.43809 | 40.29391 | 43.38908 |
| 17238278 | Atp5b      | ATP synthase, H+ transporting mitochondrial F1 complex, beta subunit            | 1630.456 | 1591.201 | 1540.422 | 1603.535 | 1311.744 | 1521.839 |
| 17408863 | Atp5f1     | ATP synthase, H+ transporting, mitochondrial F0 complex, subunit B1             | 379.8353 | 372.8212 | 347.6472 | 354.679  | 334.62   | 400.2229 |
| 17268289 | Atp5g1     | ATP synthase, H+ transporting, mitochondrial F0 complex, subunit C1 (subunit 9) | 17.58167 | 16.94644 | 15.76147 | 12.92838 | 17.15801 | 20.10915 |
| 17322280 | Atp5g2     | ATP synthase, H+ transporting, mitochondrial F0 complex, subunit C2 (subunit 9) | 178.0847 | 231.5741 | 295.3578 | 215.5278 | 221.9837 | 234.9467 |
| 17340500 | Atp5g2     | ATP synthase, H+ transporting, mitochondrial F0 complex, subunit C2 (subunit 9) | 240.5112 | 314.3352 | 396.0668 | 299.6927 | 316.2233 | 313.137  |
| 17386621 | Atp5g3     | ATP synthase, H+ transporting, mitochondrial F0 complex, subunit C3 (subunit 9) | 184.4684 | 206.4302 | 204.7841 | 199.7761 | 205.2132 | 227.446  |
| 17271891 | Atp5h      | ATP synthase, H+ transporting, mitochondrial F0 complex, subunit D              | 9.511349 | 9.987198 | 11.00151 | 9.600836 | 12.01271 | 9.447417 |
| 17315713 | Atp5h      | ATP synthase, H+ transporting, mitochondrial F0 complex, subunit D              | 494.2475 | 615.6557 | 618.4229 | 578.4707 | 541.5159 | 610.5138 |
| 17331656 | Atp5j      | ATP synthase, H+ transporting, mitochondrial F0 complex, subunit F              | 23.29454 | 22.49231 | 20.29525 | 24.05542 | 23.50686 | 23.29454 |
| 17455083 | Atp5j2     | ATP synthase, H+ transporting, mitochondrial F0 complex, subunit F2             | 7.870689 | 5.817866 | 8.404896 | 4.840983 | 4.815281 | 7.189293 |
| 17526421 | Atp5l      | ATP synthase, H+ transporting, mitochondrial F0 complex, subunit G              | 281.065  | 221.6501 | 217.7396 | 220.871  | 195.3138 | 202.1286 |
| 17478797 | Atp5l-ps1  | ATP synthase, H+ transporting, mitochondrial F0 complex, subunit G, pseudogene  | 200.228  | 308.9608 | 296.5435 | 333.9226 | 347.4087 | 355.8265 |
| 17275929 | Atp5s      | ATP synthase, H+ transporting, mitochondrial F0 complex, subunit S              | 11.06215 | 13.74057 | 14.92263 | 12.82307 | 14.34892 | 14.85195 |
| 17235200 | Atp5a1     | ATP synthase, H+ transporting, mitochondrial F1 complex, alpha subunit 1        | 1167.478 | 1162.415 | 1178.054 | 1247.073 | 1182.234 | 1363.18  |
| 17235198 | Atp5d      | ATP synthase, H+ transporting, mitochondrial F1 complex, delta subunit          | 96.03311 | 100.0072 | 107.8214 | 97.24485 | 87.70517 | 87.22078 |
| 17395165 | Atp5e      | ATP synthase, H+ transporting, mitochondrial F1 complex, epsilon subunit        | 112.239  | 83.02362 | 107.9822 | 125.4884 | 142.8018 | 138.145  |
| 17381573 | Atp5c1     | ATP synthase, H+ transporting, mitochondrial F1 complex, gamma polypeptide 1    | 21.83408 | 24.8217  | 21.30042 | 24.29807 | 21.1615  | 29.07284 |
| 17294544 | Atp5c1-ps  | ATP synthase, H+ transporting, mitochondrial F1 complex, gamma polypeptide 1,   | 3.145414 | 2.954246 | 2.501355 | 2.54868  | 2.909054 | 2.472996 |
| 17332203 | Atp5o      | ATP synthase, H+ transporting, mitochondrial F1 complex, O subunit              | 29.17458 | 21.0178  | 25.2498  | 22.63338 | 21.11183 | 25.79698 |
| 17450741 | Atp5k      | ATP synthase, H+ transporting, mitochondrial F1F0 complex, subunit E            | 131.4645 | 153.2571 | 152.5015 | 160.6904 | 175.6476 | 190.8652 |
| 17293190 | Agtpbp1    | ATP/GTP binding protein 1                                                       | 18.98463 | 17.55451 | 17.9856  | 17.82154 | 15.34259 | 14.44111 |
| 17479259 | Agbl1      | ATP/GTP binding protein-like 1                                                  | 4.291345 | 2.569006 | 3.146592 | 3.56994  | 2.58953  | 3.162663 |
| 17373057 | Agbl2      | ATP/GTP binding protein-like 2                                                  | 3.092964 | 3.991359 | 3.092964 | 3.092964 | 2.794364 | 3.034755 |
| 17457207 | Agbl3      | ATP/GTP binding protein-like 3                                                  | 4.204458 | 4.123244 | 4.113909 | 4.963336 | 4.059888 | 4.369566 |
| 17416926 | Agbl4      | ATP/GTP binding protein-like 4                                                  | 4.788985 | 4.38185  | 5.114524 | 4.661809 | 4.755642 | 4.661809 |
| 17435888 | Agbl5      | ATP/GTP binding protein-like 5                                                  | 16.27843 | 21.21511 | 20.32213 | 18.62683 | 14.08405 | 19.84866 |
| 17475311 | Atp5sl     | ATP5S-like                                                                      | 19.14041 | 33.49445 | 30.99084 | 32.07728 | 31.32386 | 34.36124 |
| 17363983 | Atad1      | ATPase family, AAA domain containing 1                                          | 155.694  | 136.0686 | 131.1569 | 130.0786 | 116.3559 | 131.7373 |
| 17317233 | Atad2      | ATPase family, AAA domain containing 2                                          | 15.64034 | 11.83887 | 17.39596 | 10.72332 | 11.27707 | 11.40323 |
| 17273819 | Atad2b     | ATPase family, AAA domain containing 2B                                         | 57.42233 | 60.68256 | 46.59425 | 55.83199 | 52.81662 | 63.5174  |
| 17433860 | Atad3a     | ATPase family, AAA domain containing 3A                                         | 56.0946  | 63.89052 | 75.82228 | 78.68627 | 81.2553  | 77.01513 |
| 17422678 | Atad3aos   | ATPase family, AAA domain containing 3A, opposite strand                        | 8.561657 | 8.166625 | 8.482209 | 8.846152 | 8.790773 | 8.561657 |
| 17253858 | Atad5      | ATPase family, AAA domain containing 5                                          | 4.001608 | 3.782369 | 3.7798   | 2.890722 | 3.288296 | 3.726393 |
| 17430878 | Atpif1     | ATPase inhibitory factor 1                                                      | 72.69731 | 107.5907 | 141.2562 | 104.8483 | 83.16877 | 97.35006 |
| 17501692 | Atp13a1    | ATPase type 13A1                                                                | 52.51108 | 46.72167 | 47.68257 | 44.51193 | 39.57726 | 45.07608 |
| 17420911 | Atp13a2    | ATPase type 13A2                                                                | 24.70498 | 24.34426 | 28.10296 | 24.96647 | 27.07332 | 24.87061 |
| 17329640 | Atp13a3    | ATPase type 13A3                                                                | 325.4225 | 252.6226 | 254.1647 | 245.6891 | 265.9369 | 258.1096 |
| 17329568 | Atp13a4    | ATPase type 13A4                                                                | 4.240869 | 3.437501 | 3.358344 | 3.30303  | 3.308621 | 3.49066  |
| 17329533 | Atp13a5    | ATPase type 13A5                                                                | 3.895693 | 3.841314 | 3.198133 | 3.501444 | 3.734927 | 3.937391 |
| 17534337 | Atp1b4     | ATPase, (Na+)/K+ transporting, beta 4 polypeptide                               | 3.496133 | 3.8716   | 4.072571 | 4.072571 | 4.072571 | 3.896503 |
| 17448475 | Atp8a1     | ATPase, aminophospholipid transporter (APLT), class I, type 8A, member 1        | 18.76536 | 20.08519 | 20.46505 | 16.01787 | 11.04889 | 14.04048 |
| 17307354 | Atp8a2     | ATPase, aminophospholipid transporter-like, class I, type 8A, member 2          | 3.969315 | 5.535409 | 4.378905 | 5.574723 | 4.886969 | 5.396485 |
| 17496211 | Atp2a1     | ATPase, Ca++ transporting, cardiac muscle, fast twitch 1                        | 7.326123 | 8.425078 | 7.193929 | 6.63143  | 4.433789 | 6.059505 |
| 17452405 | Atp2a2     | ATPase, Ca++ transporting, cardiac muscle, slow twitch 2                        | 631.3429 | 415.3662 | 431.2229 | 440.8029 | 418.4496 | 347.852  |
| 17236836 | Atp2b1     | ATPase, Ca++ transporting, plasma membrane 1                                    | 102.3871 | 91.11268 | 92.40698 | 86.2104  | 94.53325 | 98.25167 |
| 17469814 | Atp2b2     | ATPase, Ca++ transporting, plasma membrane 2                                    | 8.974428 | 9.051018 | 10.36853 | 10.54078 | 8.877602 | 7.015763 |
| 17535572 | Atp2b3     | ATPase, Ca++ transporting, plasma membrane 3                                    | 4.121073 | 3.837136 | 4.056625 | 3.440456 | 3.760957 | 3.134141 |
| 17227037 | Atp2b4     | ATPase, Ca++ transporting, plasma membrane 4                                    | 11.55416 | 9.655427 | 12.54178 | 10.52188 | 9.22034  | 9.448269 |
| 17506147 | Atp2c2     | ATPase, Ca++ transporting, type 2C, member 2                                    | 5.465487 | 4.801649 | 5.48933  | 5.48933  | 5.857317 | 5.48933  |
| 17252497 | Atp2a3     | ATPase, Ca++ transporting, ubiquitous                                           | 6.894997 | 6.957071 | 9.070298 | 5.859307 | 7.887292 | 7.46354  |
| 17530457 | Atp2c1     | ATPase, Ca++-sequestering                                                       | 70.27891 | 63.02796 | 56.11327 | 55.49131 | 63.02796 | 63.02796 |
| 17355026 | Atp8b1     | ATPase, class I, type 8B, member 1                                              | 165.9391 | 113.8066 | 107.473  | 109.1698 | 147.6349 | 94.4815  |
| 17407149 | Atp8b2     | ATPase, class I, type 8B, member 2                                              | 7.240353 | 7.674219 | 9.059868 | 7.07044  | 4.999625 | 7.751578 |
| 17242959 | Atp8b3     | ATPase, class I, type 8B, member 3                                              | 7.870689 | 11.42593 | 7.735208 | 8.64143  | 10.75719 | 8.590368 |
| 17391056 | Atp8b4     | ATPase, class I, type 8B, member 4                                              | 4.130081 | 3.08945  | 3.605952 | 3.224018 | 3.315554 | 3.144891 |
| 17413269 | Atp8b5     | ATPase, class I, type 8B, member 5                                              | 6.96508  | 7.086582 | 7.275569 | 6.198933 | 7.219305 | 7.638345 |
| 17394829 | Atp9a      | ATPase, class II, type 9A                                                       | 73.25473 | 85.99256 | 83.15033 | 65.89011 | 69.12521 | 53.8639  |
| 17355687 | Atp9b      | ATPase, class II, type 9B                                                       | 43.99172 | 47.89788 | 39.94159 | 38.96643 | 31.50568 | 37.23403 |
| 17478745 | Atp10a     | ATPase, class V, type 10A                                                       | 4.524756 | 4.933461 | 5.168838 | 4.036962 | 5.584972 | 4.378449 |
| 17248561 | Atp10b     | ATPase, class V, type 10B                                                       | 3.402511 | 3.686087 | 5.160497 | 3.496036 | 2.948089 | 3.096654 |
| 17438035 | Atp10d     | ATPase, class V, type 10D                                                       | 12.45592 | 14.60692 | 12.91826 | 17.4445  | 15.78924 | 12.71033 |
| 17499117 | Atp11a     | ATPase, class VI, type 11A                                                      | 56.80083 | 48.45219 | 48.92059 | 39.55039 | 56.20552 | 33.99451 |
| 17396892 | Atp11b     | ATPase, class VI, type 11B                                                      | 59.40984 | 57.15746 | 43.72693 | 54.21312 | 56.32916 | 60.22205 |
| 17541986 | Atp11c     | ATPase, class VI, type 11C                                                      | 498.749  | 474.0581 | 338.1689 | 482.164  | 471.77   | 458.8536 |
| 17537055 | Atp7a      | ATPase, Cu++ transporting, alpha polypeptide                                    | 33.30669 | 26.46438 | 22.16129 | 22.11694 | 26.34505 | 24.19438 |

|          |             |                                                               |          |          |          |          |          |          |
|----------|-------------|---------------------------------------------------------------|----------|----------|----------|----------|----------|----------|
| 17507955 | Atp7b       | ATPase, Cu++ transporting, beta polypeptide                   | 44.72687 | 40.2981  | 44.50113 | 43.29324 | 37.38843 | 42.44257 |
| 17535792 | Atp6ap1     | ATPase, H+ transporting, lysosomal accessory protein 1        | 118.9491 | 119.7258 | 122.2762 | 94.42258 | 107.4879 | 124.0657 |
| 17294775 | Atp6ap1l    | ATPase, H+ transporting, lysosomal accessory protein 1-like   | 3.225896 | 4.223854 | 3.729055 | 3.280828 | 4.536187 | 3.729055 |
| 17533336 | Atp6ap2     | ATPase, H+ transporting, lysosomal accessory protein 2        | 65.80658 | 72.61874 | 68.07202 | 48.548   | 64.95506 | 52.62768 |
| 17256473 | Atp6v0a1    | ATPase, H+ transporting, lysosomal V0 subunit A1              | 66.11061 | 73.69424 | 90.96439 | 73.69424 | 58.6354  | 66.74741 |
| 17442588 | Atp6v0a2    | ATPase, H+ transporting, lysosomal V0 subunit A2              | 80.5465  | 56.56195 | 68.67104 | 69.24222 | 50.7709  | 55.81187 |
| 17465942 | Atp6v0a4    | ATPase, H+ transporting, lysosomal V0 subunit A4              | 2.858365 | 5.162644 | 3.092299 | 3.703322 | 3.34385  | 4.396361 |
| 17428946 | Atp6v0b     | ATPase, H+ transporting, lysosomal V0 subunit B               | 105.8641 | 110.9011 | 111.6895 | 99.93028 | 109.5731 | 96.18167 |
| 17341731 | Atp6v0c     | ATPase, H+ transporting, lysosomal V0 subunit C               | 12.90126 | 12.61161 | 12.88098 | 13.89689 | 11.31151 | 12.38868 |
| 17457343 | Atp6v0c-ps2 | ATPase, H+ transporting, lysosomal V0 subunit C, pseudogene 2 | 94.95355 | 89.16094 | 120.2547 | 89.23328 | 87.49751 | 102.2942 |
| 17512456 | Atp6v0d1    | ATPase, H+ transporting, lysosomal V0 subunit D1              | 174.0502 | 149.3403 | 129.2777 | 144.1773 | 135.2777 | 117.1473 |
| 17423577 | Atp6v0d2    | ATPase, H+ transporting, lysosomal V0 subunit D2              | 4.681043 | 5.303887 | 5.532839 | 4.24081  | 20.09507 | 12.64872 |
| 17334948 | Atp6v0e     | ATPase, H+ transporting, lysosomal V0 subunit E               | 108.6919 | 109.7632 | 119.1438 | 99.65084 | 103.5454 | 99.196   |
| 17458308 | Atp6v0e2    | ATPase, H+ transporting, lysosomal V0 subunit E2              | 10.66876 | 8.88579  | 10.66876 | 10.73135 | 10.66876 | 10.66876 |
| 17330523 | Atp6v1a     | ATPase, H+ transporting, lysosomal V1 subunit A               | 96.03111 | 99.56591 | 95.06682 | 90.85979 | 80.99439 | 83.29454 |
| 17460107 | Atp6v1b1    | ATPase, H+ transporting, lysosomal V1 subunit B1              | 8.731624 | 8.461421 | 9.400451 | 9.314253 | 9.206291 | 8.554894 |
| 17501652 | Atp6v1b2    | ATPase, H+ transporting, lysosomal V1 subunit B2              | 114.1004 | 133.8961 | 123.3557 | 122.1331 | 125.3293 | 128.3474 |
| 17311157 | Atp6v1c1    | ATPase, H+ transporting, lysosomal V1 subunit C1              | 88.52604 | 90.47203 | 88.69618 | 90.28222 | 76.05283 | 81.91808 |
| 17280148 | Atp6v1c2    | ATPase, H+ transporting, lysosomal V1 subunit C2              | 3.621808 | 5.007082 | 3.852567 | 4.550768 | 3.569421 | 5.755495 |
| 17282104 | Atp6v1d     | ATPase, H+ transporting, lysosomal V1 subunit D               | 66.18489 | 62.34103 | 57.10836 | 62.88221 | 59.40408 | 64.84035 |
| 17470445 | Atp6v1e1    | ATPase, H+ transporting, lysosomal V1 subunit E1              | 121.1684 | 157.0816 | 155.6477 | 151.0728 | 190.6681 | 153.4697 |
| 17347883 | Atp6v1e2    | ATPase, H+ transporting, lysosomal V1 subunit E2              | 7.712187 | 9.317804 | 8.921647 | 9.617287 | 9.481465 | 8.171551 |
| 17456678 | Atp6v1f     | ATPase, H+ transporting, lysosomal V1 subunit F               | 6.073171 | 6.566752 | 6.176588 | 6.477019 | 4.483887 | 5.034889 |
| 17414760 | Atp6v1g1    | ATPase, H+ transporting, lysosomal V1 subunit G1              | 59.92392 | 55.98545 | 57.16063 | 57.68283 | 57.21137 | 58.55011 |
| 17337036 | Atp6v1g2    | ATPase, H+ transporting, lysosomal V1 subunit G2              | 29.12084 | 27.7372  | 24.99903 | 29.70863 | 27.69435 | 30.54639 |
| 17217848 | Atp6v1g3    | ATPase, H+ transporting, lysosomal V1 subunit G3              | 3.219865 | 3.941214 | 4.005993 | 5.085537 | 4.033046 | 5.554011 |
| 17210887 | Atp6v1h     | ATPase, H+ transporting, lysosomal V1 subunit H               | 56.1475  | 44.99554 | 39.61267 | 49.26325 | 50.82372 | 54.62653 |
| 17507595 | Atp4b       | ATPase, H+/K+ exchanging, beta polypeptide                    | 6.885398 | 6.711336 | 6.415893 | 6.652792 | 7.100743 | 7.095725 |
| 17476497 | Atp4a       | ATPase, H+/K+ exchanging, gastric, alpha polypeptide          | 7.979952 | 8.784012 | 8.530262 | 9.209546 | 7.557086 | 7.700382 |
| 17300735 | Atp12a      | ATPase, H+/K+ transporting, nongastric, alpha polypeptide     | 5.40472  | 4.709977 | 4.800152 | 4.412389 | 4.709977 | 4.886969 |
| 17408509 | Atp1a1      | ATPase, Na+/K+ transporting, alpha 1 polypeptide              | 249.7308 | 336.7094 | 379.9959 | 302.3341 | 346.4348 | 321.5435 |
| 17229891 | Atp1a2      | ATPase, Na+/K+ transporting, alpha 2 polypeptide              | 8.674496 | 7.698994 | 9.070738 | 8.658577 | 9.866032 | 11.28778 |
| 17487805 | Atp1a3      | ATPase, Na+/K+ transporting, alpha 3 polypeptide              | 6.267804 | 6.328089 | 6.328089 | 6.211234 | 11.94041 | 7.215053 |
| 17229865 | Atp1a4      | ATPase, Na+/K+ transporting, alpha 4 polypeptide              | 7.712508 | 5.440691 | 6.895905 | 7.699581 | 7.25467  | 9.342444 |
| 17229178 | Atp1b1      | ATPase, Na+/K+ transporting, beta 1 polypeptide               | 151.3191 | 169.541  | 132.6527 | 148.5557 | 189.8347 | 207.7378 |
| 17264792 | Atp1b2      | ATPase, Na+/K+ transporting, beta 2 polypeptide               | 4.789682 | 6.489152 | 4.502418 | 4.789682 | 4.688642 | 4.535872 |
| 17529793 | Atp1b3      | ATPase, Na+/K+ transporting, beta 3 polypeptide               | 63.96097 | 66.75065 | 73.66258 | 57.11073 | 66.50957 | 68.61585 |
| 17425301 | Abca1       | ATP-binding cassette, sub-family A (ABC1), member 1           | 219.7608 | 225.9469 | 221.9206 | 220.0946 | 240.4678 | 209.9119 |
| 17224015 | Abca12      | ATP-binding cassette, sub-family A (ABC1), member 12          | 4.47203  | 4.47203  | 4.47203  | 4.47203  | 3.945478 | 4.551493 |
| 17247241 | Abca13      | ATP-binding cassette, sub-family A (ABC1), member 13          | 3.461554 | 3.233283 | 3.190141 | 3.559168 | 3.855559 | 3.542014 |
| 17482381 | Abca14      | ATP-binding cassette, sub-family A (ABC1), member 14          | 3.517206 | 3.587826 | 3.070854 | 3.00822  | 3.28604  | 3.362397 |
| 17482416 | Abca15      | ATP-binding cassette, sub-family A (ABC1), member 15          | 3.626908 | 3.66395  | 3.729055 | 4.549443 | 3.729055 | 3.723321 |
| 17482450 | Abca16      | ATP-binding cassette, sub-family A (ABC1), member 16          | 2.890121 | 2.242332 | 2.26459  | 2.390595 | 2.507709 | 2.592547 |
| 17341803 | Abca17      | ATP-binding cassette, sub-family A (ABC1), member 17          | 7.622055 | 6.603038 | 8.50293  | 8.995977 | 6.879482 | 7.305637 |
| 17368009 | Abca2       | ATP-binding cassette, sub-family A (ABC1), member 2           | 52.34755 | 46.62785 | 42.02075 | 50.91998 | 42.09655 | 46.02673 |
| 17334205 | Abca3       | ATP-binding cassette, sub-family A (ABC1), member 3           | 89.76182 | 85.50459 | 115.1252 | 96.92453 | 87.33512 | 101.2635 |
| 17402222 | Abca4       | ATP-binding cassette, sub-family A (ABC1), member 4           | 5.676808 | 5.269149 | 4.82283  | 6.554156 | 4.759203 | 4.97284  |
| 17271486 | Abca5       | ATP-binding cassette, sub-family A (ABC1), member 5           | 17.206   | 19.49537 | 20.20373 | 15.56086 | 18.93771 | 20.42126 |
| 17271443 | Abca6       | ATP-binding cassette, sub-family A (ABC1), member 6           | 334.9426 | 349.7887 | 337.0736 | 345.0544 | 385.5382 | 401.7098 |
| 17235087 | Abca7       | ATP-binding cassette, sub-family A (ABC1), member 7           | 9.049575 | 9.666744 | 10.00494 | 9.985191 | 10.61189 | 8.836592 |
| 17271350 | Abca8a      | ATP-binding cassette, sub-family A (ABC1), member 8a          | 112.5615 | 62.64728 | 56.69226 | 81.73601 | 79.35889 | 79.0942  |
| 17271307 | Abca8b      | ATP-binding cassette, sub-family A (ABC1), member 8b          | 83.19068 | 80.28564 | 78.43741 | 71.8457  | 88.55489 | 74.01316 |
| 17271399 | Abca9       | ATP-binding cassette, sub-family A (ABC1), member 9           | 11.84002 | 12.55021 | 11.68957 | 11.65123 | 10.05227 | 10.75272 |
| 17514033 | Abcb10      | ATP-binding cassette, sub-family B (MDR/TAP), member 10       | 56.26828 | 41.13002 | 41.07048 | 48.07883 | 42.49585 | 40.14811 |
| 17386177 | Abcb11      | ATP-binding cassette, sub-family B (MDR/TAP), member 11       | 724.5643 | 542.3574 | 463.2573 | 588.8719 | 535.1391 | 478.8035 |
| 17434524 | Abcb1a      | ATP-binding cassette, sub-family B (MDR/TAP), member 1A       | 11.24904 | 25.0344  | 17.0252  | 14.35727 | 19.93056 | 18.24374 |
| 17434555 | Abcb1b      | ATP-binding cassette, sub-family B (MDR/TAP), member 1B       | 2.861755 | 4.792904 | 3.990225 | 5.167083 | 5.57998  | 4.746125 |
| 17434585 | Abcb4       | ATP-binding cassette, sub-family B (MDR/TAP), member 4        | 746.2887 | 792.54   | 706.5315 | 744.6146 | 683.5201 | 702.4443 |
| 17284808 | Abcb5       | ATP-binding cassette, sub-family B (MDR/TAP), member 5        | 3.416384 | 3.54506  | 3.267099 | 3.662402 | 3.68831  | 3.582061 |
| 17224476 | Abcb6       | ATP-binding cassette, sub-family B (MDR/TAP), member 6        | 100.6519 | 104.3951 | 100.9173 | 99.45693 | 80.27785 | 98.42958 |
| 17543852 | Abcb7       | ATP-binding cassette, sub-family B (MDR/TAP), member 7        | 103.1343 | 95.47493 | 94.047   | 90.09468 | 86.73245 | 92.07196 |
| 17435311 | Abcb8       | ATP-binding cassette, sub-family B (MDR/TAP), member 8        | 28.70161 | 26.89265 | 25.82757 | 30.99965 | 29.11761 | 29.20533 |
| 17452719 | Abcb9       | ATP-binding cassette, sub-family B (MDR/TAP), member 9        | 11.87627 | 13.20388 | 11.69946 | 11.50086 | 11.76435 | 9.951196 |
| 17323138 | Abcc1       | ATP-binding cassette, sub-family C (CFTR/MRP), member 1       | 10.81949 | 17.43072 | 15.77633 | 19.3138  | 11.95896 | 16.8761  |
| 17345362 | Abcc10      | ATP-binding cassette, sub-family C (CFTR/MRP), member 10      | 23.96123 | 23.96123 | 28.29451 | 23.96123 | 22.43563 | 18.56702 |
| 17511410 | Abcc12      | ATP-binding cassette, sub-family C (CFTR/MRP), member 12      | 4.236785 | 4.746848 | 5.15592  | 5.151919 | 3.819887 | 4.954021 |
| 17359636 | Abcc2       | ATP-binding cassette, sub-family C (CFTR/MRP), member 2       | 727.7908 | 828.0649 | 713.7178 | 763.1697 | 789.1523 | 894.2287 |
| 17267846 | Abcc3       | ATP-binding cassette, sub-family C (CFTR/MRP), member 3       | 336.8844 | 392.552  | 405.0763 | 343.1344 | 267.3322 | 359.351  |
| 17309420 | Abcc4       | ATP-binding cassette, sub-family C (CFTR/MRP), member 4       | 15.4233  | 20.06418 | 22.64421 | 18.15582 | 11.82215 | 15.43764 |
| 17329105 | Abcc5       | ATP-binding cassette, sub-family C (CFTR/MRP), member 5       | 9.027334 | 10.25418 | 9.965485 | 9.34089  | 8.149604 | 8.226792 |
| 17491035 | Abcc6       | ATP-binding cassette, sub-family C (CFTR/MRP), member 6       | 71.05774 | 74.67016 | 78.88997 | 78.85225 | 82.04139 | 85.55024 |
| 17491074 | Abcc8       | ATP-binding cassette, sub-family C (CFTR/MRP), member 8       | 7.663854 | 6.904323 | 7.274101 | 7.698994 | 7.817785 | 8.79638  |
| 17472536 | Abcc9       | ATP-binding cassette, sub-family C (CFTR/MRP), member 9       | 92.71045 | 113.4058 | 123.543  | 87.65655 | 95.74266 | 81.13036 |
| 17535627 | Abcd1       | ATP-binding cassette, sub-family D (ALD), member 1            | 45.83189 | 44.78364 | 57.43905 | 45.84556 | 35.8798  | 45.99834 |
| 17320652 | Abcd2       | ATP-binding cassette, sub-family D (ALD), member 2            | 46.43305 | 84.50589 | 86.58769 | 48.21867 | 114.3474 | 77.08296 |
| 17409920 | Abcd3       | ATP-binding cassette, sub-family D (ALD), member 3            | 1195.899 | 1145.118 | 1116.347 | 1230.748 | 985.97   | 1140.887 |
| 17282534 | Abcd4       | ATP-binding cassette, sub-family D (ALD), member 4            | 19.73042 | 19.59414 | 24.78079 | 26.28194 | 27.31024 | 27.57846 |
| 17510749 | Abce1       | ATP-binding cassette, sub-family E (OABP), member 1           | 282.0916 | 210.9182 | 208.864  | 216.9848 | 209.6937 | 190.5321 |
| 17344511 | Abcf1       | ATP-binding cassette, sub-family F (GCN20), member 1          | 80.97474 | 82.9891  | 82.13755 | 96.00782 | 82.88448 | 83.54722 |
| 17446253 | Abcf2       | ATP-binding cassette, sub-family F (GCN20), member 2          | 88.82907 | 81.62957 | 72.31886 | 74.12971 | 82.93332 | 88.28155 |
| 17323945 | Abcf3       | ATP-binding cassette, sub-family F (GCN20), member 3          | 66.44598 | 53.0724  | 46.01716 | 52.29822 | 50.97048 | 46.87575 |
| 17335770 | Abcg1       | ATP-binding cassette, sub-family G (WHITE), member 1          | 29.0042  | 28.94034 | 32.13292 | 26.76953 | 29.99687 | 31.28458 |
| 17459014 | Abcg2       | ATP-binding cassette, sub-family G (WHITE), member 2          | 184.8947 | 120.7358 | 77.23913 | 113.734  | 85.57396 | 102.9293 |
| 17450414 | Abcg3       | ATP-binding cassette, sub-family G (WHITE), member 3          | 13.25018 | 12.71712 | 13.75496 | 12.22311 | 10.16128 | 7.880078 |

|          |            |                                                                                      |          |          |          |          |          |          |
|----------|------------|--------------------------------------------------------------------------------------|----------|----------|----------|----------|----------|----------|
| 17526175 | Abcg4      | ATP-binding cassette, sub-family G (WHITE), member 4                                 | 4.647678 | 4.220927 | 7.076765 | 4.339594 | 5.273863 | 4.816383 |
| 17347729 | Abcg5      | ATP-binding cassette, sub-family G (WHITE), member 5                                 | 113.2165 | 133.8803 | 80.07778 | 146.8175 | 134.333  | 159.7852 |
| 17340099 | Abcg8      | ATP-binding cassette, sub-family G (WHITE), member 8                                 | 126.0568 | 153.6922 | 105.8135 | 147.9873 | 156.8683 | 188.8203 |
| 17531265 | Atrip      | ATR interacting protein                                                              | 12.35763 | 13.58695 | 11.06959 | 14.10779 | 10.23465 | 12.63059 |
| 17470831 | Atn1       | atrophin 1                                                                           | 28.83102 | 42.16108 | 49.10064 | 40.31878 | 42.51323 | 48.88026 |
| 17376391 | Atrn       | attractin                                                                            | 111.3409 | 102.9578 | 107.041  | 113.7261 | 110.3957 | 84.72759 |
| 17360695 | Atrnl1     | attractin like 1                                                                     | 65.38963 | 56.32057 | 56.20163 | 59.42879 | 54.09187 | 54.16128 |
| 17263004 | Atox1      | ATX1 (antioxidant protein 1) homolog 1 (yeast)                                       | 122.8701 | 178.7179 | 200.5016 | 169.0586 | 131.4072 | 148.2235 |
| 17229984 | Ackr1      | atypical chemokine receptor 1 (Duffy blood group)                                    | 6.812102 | 6.812102 | 8.237691 | 6.41785  | 7.33161  | 6.356136 |
| 17523371 | Ackr2      | atypical chemokine receptor 2                                                        | 33.65759 | 31.68812 | 42.70432 | 34.71988 | 25.1867  | 32.3894  |
| 17215605 | Ackr3      | atypical chemokine receptor 3                                                        | 11.05763 | 10.06922 | 11.48151 | 8.422742 | 7.519517 | 10.86081 |
| 17530339 | Ackr4      | atypical chemokine receptor 4                                                        | 5.134344 | 5.008609 | 6.667519 | 4.970979 | 5.230359 | 4.367507 |
| 17292612 | Auh        | AU RNA binding protein/enoyl-coenzyme A hydratase                                    | 22.2958  | 25.64703 | 26.99256 | 25.69329 | 21.42911 | 22.99471 |
| 17395016 | Aurka      | aurora kinase A                                                                      | 7.897193 | 7.847592 | 7.698994 | 8.092694 | 6.103937 | 7.698994 |
| 17419792 | Aunip      | aurora kinase A and ninein interacting protein                                       | 5.68969  | 4.839876 | 5.167513 | 4.72181  | 4.637123 | 7.05365  |
| 17422722 | Aurkaip1   | aurora kinase A interacting protein 1                                                | 29.90283 | 31.46116 | 30.24301 | 32.61446 | 27.3413  | 33.53533 |
| 17251485 | Aurkb      | aurora kinase B                                                                      | 9.914362 | 8.953737 | 8.765887 | 7.698994 | 6.866286 | 9.41917  |
| 17473650 | Aurkc      | aurora kinase C                                                                      | 14.77606 | 9.07099  | 15.77251 | 10.91553 | 9.755461 | 14.88606 |
| 17453242 | Auts2      | autism susceptibility candidate 2                                                    | 5.022376 | 5.644986 | 5.543396 | 5.543396 | 5.169053 | 6.940406 |
| 17511808 | Amfr       | autocrine motility factor receptor                                                   | 415.7522 | 377.3004 | 386.2443 | 419.0882 | 444.7282 | 367.4566 |
| 17242401 | Aire       | autoimmune regulator (autoimmune polyendocrinopathy candidiasis ectodermal c         | 16.48555 | 18.0588  | 18.45922 | 17.0945  | 16.5241  | 16.62785 |
| 17294785 | Atg10      | autophagy related 10                                                                 | 21.83363 | 24.27619 | 16.8994  | 14.58325 | 22.35336 | 19.05067 |
| 17315187 | Atg101     | autophagy related 101                                                                | 46.11487 | 46.60846 | 45.02767 | 41.3768  | 72.47844 | 60.82785 |
| 17354290 | Atg12      | autophagy related 12                                                                 | 39.25923 | 34.93763 | 38.95509 | 38.64018 | 32.65699 | 32.43726 |
| 17388261 | Atg13      | autophagy related 13                                                                 | 127.459  | 83.93671 | 82.05504 | 93.04392 | 83.93671 | 84.2947  |
| 17305813 | Atg14      | autophagy related 14                                                                 | 38.03907 | 37.50055 | 47.53967 | 47.53967 | 51.57071 | 46.87023 |
| 17215345 | Atg16l1    | autophagy related 16-like 1 (S. cerevisiae)                                          | 45.22003 | 39.9355  | 44.61138 | 49.45108 | 52.54458 | 33.44225 |
| 17493880 | Atg16l2    | autophagy related 16-like 2 (S. cerevisiae)                                          | 17.01612 | 20.08811 | 18.49649 | 18.49649 | 15.03195 | 12.80912 |
| 17356695 | Atg2a      | autophagy related 2A                                                                 | 50.37758 | 47.79309 | 54.2808  | 57.43348 | 49.98142 | 47.44782 |
| 17283784 | Atg2b      | autophagy related 2B                                                                 | 53.22455 | 51.08012 | 46.98082 | 48.54228 | 42.41228 | 44.02466 |
| 17325919 | Atg3       | autophagy related 3                                                                  | 193.9163 | 217.0058 | 188.645  | 196.536  | 201.5536 | 226.3984 |
| 17538206 | Atg4a      | autophagy related 4A, cysteine peptidase                                             | 43.09355 | 46.90631 | 43.4574  | 45.50395 | 33.49979 | 38.33446 |
| 17216070 | Atg4b      | autophagy related 4B, cysteine peptidase                                             | 28.61064 | 28.02476 | 28.61064 | 24.20964 | 27.69435 | 30.17057 |
| 17415747 | Atg4c      | autophagy related 4C, cysteine peptidase                                             | 42.07204 | 40.58374 | 33.74917 | 40.47502 | 48.88195 | 39.37178 |
| 17415768 | Atg4c      | autophagy related 4C, cysteine peptidase                                             | 9.049449 | 8.426655 | 9.488237 | 7.357165 | 9.810115 | 11.40315 |
| 17515132 | Atg4d      | autophagy related 4D, cysteine peptidase                                             | 21.99357 | 24.95644 | 24.27131 | 27.32899 | 25.72091 | 25.5707  |
| 17233061 | Atg5       | autophagy related 5                                                                  | 107.4126 | 106.3436 | 91.56092 | 121.0408 | 115.7951 | 111.3973 |
| 17461897 | Atg7       | autophagy related 7                                                                  | 69.82975 | 67.61306 | 67.61306 | 66.62307 | 63.60772 | 68.99309 |
| 17224500 | Atg9a      | autophagy related 9A                                                                 | 54.34216 | 57.34358 | 61.17711 | 51.40583 | 44.87064 | 63.70788 |
| 17446153 | Atg9b      | autophagy related 9B                                                                 | 4.01461  | 4.347211 | 4.133059 | 3.781242 | 3.997699 | 4.667662 |
| 17373417 | Ambra1     | autophagy/beclin 1 regulator 1                                                       | 47.20704 | 50.11081 | 49.52963 | 40.63694 | 42.24738 | 49.52963 |
| 17332358 | Erg        | avian erythroblastosis virus E-26 (v-ets) oncogene related                           | 17.23776 | 15.19958 | 20.22027 | 15.3121  | 14.1553  | 15.87242 |
| 17513289 | Maf        | avian musculoaponeurotic fibrosarcoma (v-maf) AS42 oncogene homolog                  | 41.42357 | 61.75654 | 63.48219 | 53.02791 | 38.48248 | 48.6946  |
| 17487325 | Relb       | avian reticuloendotheliosis viral (v-rel) oncogene related B                         | 17.69684 | 17.69684 | 19.47188 | 20.07962 | 17.69684 | 18.64788 |
| 17458892 | Avl9       | AVL9 homolog (S. cerevisiae)                                                         | 54.25447 | 70.29548 | 58.65247 | 68.40358 | 57.44383 | 67.28766 |
| 17334869 | Axin1      | axin 1                                                                               | 34.9895  | 36.29905 | 32.05928 | 28.20287 | 31.15734 | 31.07107 |
| 17220439 | Aida       | axin interactor, dorsalization associated                                            | 23.13363 | 24.76447 | 31.926   | 34.12341 | 26.42552 | 24.36114 |
| 17257801 | Axin2      | axin2                                                                                | 19.99185 | 26.26592 | 22.10407 | 23.84029 | 16.80537 | 21.93587 |
| 17488032 | Axl        | AXL receptor tyrosine kinase                                                         | 68.95484 | 79.53511 | 100.3836 | 68.95484 | 55.49093 | 68.95484 |
| 17228515 | Axdnd1     | axonemal dynein light chain domain containing 1                                      | 3.462322 | 3.098865 | 3.747062 | 2.376239 | 3.638919 | 3.261329 |
| 17325938 | Btla       | B and T lymphocyte associated                                                        | 4.27312  | 4.613143 | 4.237167 | 3.520938 | 4.621304 | 4.440894 |
| 17247849 | Bcl11a     | B cell CLL/lymphoma 11A (zinc finger protein)                                        | 12.22337 | 12.34881 | 13.94175 | 12.23091 | 12.29577 | 11.17072 |
| 17247852 | Bcl11a     | B cell CLL/lymphoma 11A (zinc finger protein)                                        | 5.338965 | 4.495682 | 5.338965 | 6.831631 | 4.371838 | 5.338965 |
| 17265164 | Bcl6b      | B cell CLL/lymphoma 6, member B                                                      | 9.67177  | 10.20356 | 9.064893 | 9.544635 | 12.94847 | 11.09486 |
| 17442269 | Bcl7a      | B cell CLL/lymphoma 7A                                                               | 13.55403 | 12.3958  | 13.78436 | 13.91231 | 12.22735 | 12.87044 |
| 17443221 | Bcl7b      | B cell CLL/lymphoma 7B                                                               | 40.07137 | 28.86481 | 31.21397 | 31.21397 | 22.69905 | 31.63062 |
| 17496742 | Bcl7c      | B cell CLL/lymphoma 7C                                                               | 10.09907 | 9.905433 | 7.614081 | 12.24907 | 9.905501 | 10.09928 |
| 17408163 | Bcl9       | B cell CLL/lymphoma 9                                                                | 11.54951 | 14.5465  | 19.16165 | 15.00426 | 14.59225 | 14.69038 |
| 17516621 | Bcl9l      | B cell CLL/lymphoma 9-like                                                           | 27.21009 | 37.42784 | 34.05158 | 29.35939 | 34.05158 | 36.07556 |
| 17403451 | Bcl10      | B cell leukemia/lymphoma 10                                                          | 33.49607 | 41.57545 | 34.79167 | 35.25021 | 39.7199  | 35.90095 |
| 17283871 | Bcl11b     | B cell leukemia/lymphoma 11B                                                         | 4.586647 | 7.520351 | 5.543396 | 7.361705 | 4.683769 | 4.777911 |
| 17226043 | Bcl2       | B cell leukemia/lymphoma 2                                                           | 10.61035 | 9.521111 | 11.77765 | 9.07099  | 9.706963 | 8.231127 |
| 17520162 | Bcl2a1a    | B cell leukemia/lymphoma 2 related protein A1a                                       | 6.992896 | 6.855301 | 6.794983 | 7.432616 | 6.992896 | 8.420524 |
| 17520171 | Bcl2a1b    | B cell leukemia/lymphoma 2 related protein A1b                                       | 5.520657 | 4.619126 | 7.07598  | 4.959003 | 7.093167 | 5.918699 |
| 17522726 | Bcl2a1c    | B cell leukemia/lymphoma 2 related protein A1c                                       | 5.876552 | 6.586947 | 6.828837 | 6.434732 | 6.045744 | 7.558029 |
| 17529575 | Bcl2a1d    | B cell leukemia/lymphoma 2 related protein A1d                                       | 11.04139 | 10.97524 | 13.58036 | 10.95722 | 10.82144 | 8.624495 |
| 17487457 | Bcl3       | B cell leukemia/lymphoma 3                                                           | 64.89566 | 54.85571 | 62.63773 | 64.22798 | 50.44747 | 31.93087 |
| 17329433 | Bcl6       | B cell leukemia/lymphoma 6                                                           | 39.08681 | 31.04287 | 20.42296 | 105.2721 | 93.80546 | 74.66602 |
| 17364565 | Blnk       | B cell linker                                                                        | 7.31126  | 11.43829 | 10.41665 | 9.178956 | 9.991076 | 8.535585 |
| 17280552 | Bcap29     | B cell receptor associated protein 29                                                | 37.13609 | 37.49769 | 36.07206 | 39.34886 | 40.35345 | 37.903   |
| 17542382 | Bcap31     | B cell receptor associated protein 31                                                | 218.2155 | 220.8832 | 213.6551 | 215.5278 | 180.1481 | 211.8119 |
| 17410581 | Bank1      | B cell scaffold protein with ankyrin repeats 1                                       | 20.57114 | 19.38609 | 26.88203 | 17.64797 | 17.83575 | 17.31944 |
| 17236787 | Btg1       | B cell translocation gene 1, anti-proliferative                                      | 26.46952 | 30.16116 | 34.72325 | 28.32806 | 31.44939 | 31.14546 |
| 17541134 | Btg1-ps1   | B cell translocation gene 1, anti-proliferative, pseudogene 1                        | 4.496679 | 5.311318 | 3.703322 | 4.20927  | 5.185884 | 4.396118 |
| 17541140 | Btg1-ps2   | B cell translocation gene 1, anti-proliferative, pseudogene 2                        | 4.122101 | 4.514731 | 4.814981 | 4.645359 | 5.662582 | 4.03713  |
| 17227089 | Btg2       | B cell translocation gene 2, anti-proliferative                                      | 28.61481 | 31.11115 | 43.74269 | 19.45137 | 63.97073 | 40.57559 |
| 17331589 | Btg3       | B cell translocation gene 3                                                          | 30.0666  | 21.70191 | 17.25461 | 18.37739 | 22.64782 | 10.28023 |
| 17517200 | Btg4       | B cell translocation gene 4                                                          | 3.288615 | 3.060442 | 2.98477  | 2.884058 | 2.961422 | 3.080298 |
| 17295525 | Bdp1       | B double prime 1, subunit of RNA polymerase III transcription initiation factor IIIB | 45.48062 | 42.18418 | 38.33021 | 33.03698 | 40.58909 | 36.72626 |
| 17307623 | Blk        | B lymphoid kinase                                                                    | 6.922101 | 8.297864 | 8.122929 | 8.976232 | 6.930935 | 9.232683 |
| 17250597 | B9d1       | B9 protein domain 1                                                                  | 18.12463 | 16.47687 | 16.47687 | 15.77436 | 15.82683 | 17.76838 |
| 17263835 | B9d1os     | B9 protein domain 1, opposite strand                                                 | 4.821092 | 4.20927  | 5.526362 | 4.804612 | 5.292429 | 4.670931 |
| 17475336 | B9d2       | B9 protein domain 2                                                                  | 10.03098 | 11.24366 | 10.09802 | 9.528374 | 11.24366 | 11.24366 |
| 17548324 | Anp32b-ps1 | Bacidic (leucine-rich) nuclear phosphoprotein 32 family, member B, pseudogene 1      | 148.7411 | 207.8185 | 214.3404 | 176.1939 | 236.1959 | 207.8185 |

|          |          |                                                                    |          |          |          |          |          |          |
|----------|----------|--------------------------------------------------------------------|----------|----------|----------|----------|----------|----------|
| 17378808 | Bpi      | bactericidal permeability increasing protein                       | 4.987822 | 4.113681 | 4.20927  | 4.20927  | 4.148903 | 4.196132 |
| 17523852 | Birc2    | baculoviral IAP repeat-containing 2                                | 27.16675 | 24.17627 | 24.37162 | 27.41968 | 32.39816 | 31.3547  |
| 17523861 | Birc2    | baculoviral IAP repeat-containing 2                                | 8.839961 | 10.00438 | 8.493446 | 8.493446 | 7.366452 | 8.493446 |
| 17523863 | Birc3    | baculoviral IAP repeat-containing 3                                | 29.23876 | 27.02195 | 29.61939 | 33.53208 | 36.7665  | 36.70692 |
| 17258867 | Birc5    | baculoviral IAP repeat-containing 5                                | 2.567635 | 3.263862 | 3.263862 | 3.058809 | 3.396573 | 2.52997  |
| 17339630 | Birc6    | baculoviral IAP repeat-containing 6                                | 138.5612 | 137.0264 | 131.667  | 134.8891 | 127.0348 | 128.111  |
| 17380879 | Birc7    | baculoviral IAP repeat-containing 7 (livin)                        | 3.705633 | 3.784598 | 3.931337 | 3.985774 | 4.252526 | 4.217915 |
| 17259276 | Bahcc1   | BAH domain and coiled-coil containing 1                            | 18.58131 | 17.68826 | 17.82487 | 17.82487 | 14.07058 | 17.82487 |
| 17454977 | Baiap2l1 | BAI1-associated protein 2-like 1                                   | 111.8468 | 131.1615 | 159.4257 | 132.5663 | 155.9868 | 120.7835 |
| 17319150 | Baiap2l2 | BAI1-associated protein 2-like 2                                   | 6.064211 | 7.948375 | 8.170192 | 9.450758 | 7.373604 | 8.046994 |
| 17342182 | Baiap3   | BAI1-associated protein 3                                          | 13.59986 | 13.35465 | 16.26434 | 12.43332 | 10.87241 | 14.3522  |
| 17361385 | Bbs1     | Bardet-Biedl syndrome 1 (human)                                    | 10.20207 | 12.21879 | 11.70489 | 10.93234 | 10.04489 | 12.59658 |
| 17237247 | Bbs10    | Bardet-Biedl syndrome 10 (human)                                   | 7.302953 | 7.072205 | 7.087172 | 7.865236 | 6.105968 | 8.67594  |
| 17397120 | Bbs12    | Bardet-Biedl syndrome 12 (human)                                   | 8.913549 | 7.725402 | 8.666864 | 8.095274 | 7.550018 | 6.734123 |
| 17511834 | Bbs2     | Bardet-Biedl syndrome 2 (human)                                    | 8.175064 | 10.46369 | 10.48228 | 11.50086 | 11.466   | 13.59656 |
| 17527769 | Bbs4     | Bardet-Biedl syndrome 4 (human)                                    | 6.216704 | 6.11482  | 7.18242  | 8.555546 | 7.345649 | 6.2941   |
| 17371436 | Bbs5     | Bardet-Biedl syndrome 5 (human)                                    | 9.032279 | 6.975758 | 6.250017 | 7.019898 | 5.75753  | 7.31638  |
| 17404835 | Bbs7     | Bardet-Biedl syndrome 7 (human)                                    | 17.07472 | 13.95635 | 15.78957 | 14.86884 | 15.28707 | 14.32338 |
| 17515446 | Bbs9     | Bardet-Biedl syndrome 9 (human)                                    | 14.2762  | 17.63378 | 17.35609 | 17.35609 | 16.25115 | 12.43324 |
| 17383441 | Barhl1   | BarH-like 1 (Drosophila)                                           | 5.276532 | 5.255471 | 4.91016  | 5.999199 | 4.903528 | 4.115136 |
| 17450536 | Barhl2   | BarH-like 2 (Drosophila)                                           | 8.114206 | 8.785412 | 7.063631 | 9.379883 | 10.52056 | 11.14643 |
| 17287093 | Barx1    | BarH-like homeobox 1                                               | 19.67661 | 18.71626 | 18.62954 | 18.11697 | 20.06432 | 17.82067 |
| 17525296 | Barx2    | BarH-like homeobox 2                                               | 4.658934 | 3.829059 | 3.557244 | 4.250463 | 3.060739 | 4.475845 |
| 17361552 | Banf1    | barrier to autointegration factor 1                                | 31.66155 | 35.81396 | 44.55854 | 33.73817 | 35.57939 | 42.35352 |
| 17377019 | Banf2    | barrier to autointegration factor 2                                | 5.791351 | 6.519268 | 6.171709 | 9.079545 | 7.221207 | 6.978902 |
| 17392366 | Banf2os  | barrier to autointegration factor 2, opposite strand               | 5.293016 | 5.518438 | 5.563374 | 5.046594 | 4.17947  | 4.993564 |
| 17427784 | Bsnd     | Bartter syndrome, infantile, with sensorineural deafness (Barttin) | 6.350895 | 5.940853 | 6.953069 | 5.085501 | 5.703668 | 6.573993 |
| 17277251 | Bbof1    | basal body orientation factor 1                                    | 6.245599 | 5.458483 | 5.696793 | 6.087247 | 5.613148 | 6.539725 |
| 17487422 | Bcam     | basal cell adhesion molecule                                       | 14.78754 | 17.5941  | 16.3182  | 17.05733 | 14.74486 | 16.79267 |
| 17537853 | Bhlhb9   | basic helix-loop-helix domain containing, class B9                 | 10.00043 | 14.16482 | 15.09438 | 11.28356 | 11.28356 | 9.605096 |
| 17444481 | Bhlha15  | basic helix-loop-helix family, member a15                          | 8.801443 | 8.21887  | 6.564704 | 6.441336 | 9.866853 | 8.133013 |
| 17253170 | Bhlha9   | basic helix-loop-helix family, member a9                           | 12.27388 | 13.76326 | 13.39423 | 16.02164 | 13.73162 | 12.10734 |
| 17396195 | Bhlhe22  | basic helix-loop-helix family, member e22                          | 5.457348 | 6.431922 | 5.96371  | 6.204307 | 4.317721 | 8.112294 |
| 17395684 | Bhlhe23  | basic helix-loop-helix family, member e23                          | 7.814535 | 7.814535 | 8.505936 | 7.064855 | 7.895004 | 7.995122 |
| 17461414 | Bhlhe40  | basic helix-loop-helix family, member e40                          | 106.9669 | 154.0879 | 179.4614 | 93.79051 | 155.6714 | 134.2511 |
| 17472760 | Bhlhe41  | basic helix-loop-helix family, member e41                          | 3.462322 | 6.043943 | 4.763692 | 6.154834 | 5.390765 | 5.629786 |
| 17213139 | Bzw1     | basic leucine zipper and W2 domains 1                              | 223.0016 | 197.1473 | 159.4754 | 194.0857 | 192.326  | 203.1315 |
| 17280760 | Bzw2     | basic leucine zipper and W2 domains 2                              | 17.60679 | 21.09487 | 21.79024 | 19.04605 | 24.65195 | 25.92748 |
| 17229166 | Blzf1    | basic leucine zipper nuclear factor 1                              | 18.59187 | 15.27817 | 16.15882 | 18.52742 | 16.15781 | 15.71293 |
| 17277404 | Batf     | basic leucine zipper transcription factor, ATF-like                | 11.97455 | 13.59948 | 11.37465 | 16.11207 | 9.621421 | 12.42583 |
| 17356662 | Batf2    | basic leucine zipper transcription factor, ATF-like 2              | 10.48228 | 10.48228 | 10.29934 | 10.66218 | 10.48228 | 11.30595 |
| 17220787 | Batf3    | basic leucine zipper transcription factor, ATF-like 3              | 7.698994 | 8.20902  | 8.343831 | 7.545884 | 7.800086 | 6.398883 |
| 17295362 | Btf3     | basic transcription factor 3                                       | 82.61776 | 111.9562 | 119.3405 | 78.19367 | 89.74813 | 96.82784 |
| 17428116 | Btf3l4   | basic transcription factor 3-like 4                                | 47.02057 | 58.82592 | 53.45155 | 58.82592 | 51.31825 | 61.74327 |
| 17212406 | Bivm     | basic, immunoglobulin-like variable motif containing               | 22.89562 | 19.13749 | 20.59425 | 20.80055 | 22.59748 | 21.15593 |
| 17234926 | Bsg      | basigin                                                            | 523.244  | 652.2359 | 794.0302 | 521.6361 | 682.8524 | 555.676  |
| 17492870 | Bnc1     | basonuclin 1                                                       | 5.41706  | 3.278737 | 3.708125 | 3.969122 | 4.376052 | 4.425284 |
| 17426929 | Bnc2     | basonuclin 2                                                       | 3.193946 | 4.375021 | 3.995705 | 3.995705 | 3.263862 | 3.995705 |
| 17531154 | Bsn      | basoon                                                             | 8.969142 | 8.968272 | 8.779081 | 8.601868 | 8.601868 | 9.277268 |
| 17414572 | Bspry    | B-box and SPRY domain containing                                   | 8.37158  | 7.281471 | 8.61619  | 7.281471 | 7.281471 | 7.169189 |
| 17365721 | Bbip1    | BBSome interacting protein 1                                       | 26.72207 | 24.02776 | 25.90215 | 22.83777 | 23.67299 | 26.97386 |
| 17321578 | Bcdin3d  | BCDIN3 domain containing                                           | 11.40971 | 9.289043 | 10.03077 | 11.43148 | 12.14592 | 15.56539 |
| 17298823 | Gm32l9   | B-cell CLL/lymphoma 7C pseudogene                                  | 72.02071 | 57.78928 | 47.50739 | 60.75916 | 59.96089 | 50.7709  |
| 17338529 | Gm7334   | B-cell translocation gene 3 pseudogene                             | 23.64396 | 14.37799 | 15.29067 | 18.70588 | 23.47576 | 7.552635 |
| 17474097 | Bbc3     | BCL2 binding component 3                                           | 8.871758 | 13.88072 | 11.74781 | 10.57862 | 11.68868 | 13.96535 |
| 17389724 | Bmf      | BCL2 modifying factor                                              | 8.676721 | 9.573391 | 10.39422 | 12.8683  | 10.83217 | 11.43639 |
| 17407749 | Bnip1    | BCL2/adenovirus E1B 19kD interacting protein like                  | 6.661283 | 8.092469 | 8.612846 | 11.13662 | 8.959635 | 8.415856 |
| 17334970 | Bnip1    | BCL2/adenovirus E1B interacting protein 1                          | 34.82907 | 35.07254 | 33.12182 | 35.99189 | 41.44511 | 45.13829 |
| 17518991 | Bnip2    | BCL2/adenovirus E1B interacting protein 2                          | 75.22603 | 69.27006 | 60.42945 | 59.49885 | 69.99791 | 69.07348 |
| 17497421 | Bnip3    | BCL2/adenovirus E1B interacting protein 3                          | 99.6239  | 152.3938 | 159.7974 | 114.0964 | 181.1687 | 149.1955 |
| 17307923 | Bnip3l   | BCL2/adenovirus E1B interacting protein 3-like                     | 206.8025 | 210.2395 | 202.3319 | 193.5993 | 201.9158 | 177.1306 |
| 17342676 | Bak1     | BCL2-antagonist/killer 1                                           | 22.04378 | 26.98714 | 37.02788 | 29.22781 | 28.29098 | 26.92604 |
| 17356974 | Bad      | BCL2-associated agonist of cell death                              | 13.54642 | 13.44772 | 13.40268 | 13.49909 | 12.78004 | 11.51554 |
| 17424094 | Bag1     | BCL2-associated athanogene 1                                       | 58.03133 | 58.45968 | 61.94303 | 64.46034 | 65.01272 | 64.02707 |
| 17222020 | Bag2     | BCL2-associated athanogene 2                                       | 19.42873 | 17.13649 | 16.67159 | 15.12601 | 18.08134 | 17.93132 |
| 17483733 | Bag3     | BCL2-associated athanogene 3                                       | 92.94981 | 81.69467 | 75.29019 | 63.94723 | 62.51455 | 53.6007  |
| 17508416 | Bag4     | BCL2-associated athanogene 4                                       | 91.30488 | 86.95457 | 94.16767 | 86.33837 | 81.92546 | 93.88287 |
| 17284124 | Bag5     | BCL2-associated athanogene 5                                       | 21.83726 | 22.19357 | 20.13844 | 23.29454 | 17.81907 | 25.39302 |
| 17336987 | Bag6     | BCL2-associated athanogene 6                                       | 101.2908 | 116.5431 | 105.1613 | 86.03489 | 107.3732 | 105.1613 |
| 17231946 | Bclaf1   | BCL2-associated transcription factor 1                             | 84.09103 | 131.7017 | 103.3977 | 105.9052 | 106.8646 | 113.9968 |
| 17490839 | Bax      | BCL2-associated X protein                                          | 41.66459 | 43.65273 | 41.96108 | 36.20056 | 44.91359 | 34.41892 |
| 17313647 | Bik      | BCL2-interacting killer                                            | 23.65773 | 25.88241 | 28.15345 | 29.10328 | 20.44605 | 29.61138 |
| 17392991 | Bcl2l1   | BCL2-like 1                                                        | 25.08217 | 26.80815 | 24.12421 | 23.70435 | 29.81466 | 22.89182 |
| 17519498 | Bcl2l10  | Bcl2-like 10                                                       | 3.581118 | 3.600731 | 3.715561 | 3.781766 | 4.039705 | 3.036607 |
| 17375961 | Bcl2l11  | BCL2-like 11 (apoptosis facilitator)                               | 7.404231 | 8.420466 | 10.77914 | 9.801075 | 9.296322 | 11.2109  |
| 17490521 | Bcl2l12  | BCL2-like 12 (proline rich)                                        | 18.65086 | 17.39511 | 18.16261 | 18.3518  | 20.65959 | 19.44072 |
| 17462407 | Bcl2l13  | BCL2-like 13 (apoptosis facilitator)                               | 39.45838 | 42.26935 | 43.11327 | 44.7914  | 41.20222 | 43.05861 |
| 17463689 | Bcl2l14  | BCL2-like 14 (apoptosis facilitator)                               | 3.627436 | 3.06093  | 2.968841 | 4.54938  | 4.080823 | 4.255239 |
| 17300349 | Bcl2l2   | BCL2-like 2                                                        | 19.14891 | 17.81166 | 17.3526  | 15.17516 | 13.96961 | 21.79779 |
| 17216063 | Bok      | BCL2-related ovarian killer                                        | 25.87846 | 25.53404 | 25.09295 | 32.06528 | 28.20443 | 28.06013 |
| 17534593 | Bcor1l   | BCL6 co-repressor-like 1                                           | 19.26126 | 27.69877 | 24.8863  | 20.86438 | 23.62185 | 26.64753 |
| 17540243 | Bcor     | BCL6 interacting corepressor                                       | 17.77946 | 24.4381  | 20.29525 | 20.29525 | 21.09662 | 20.86626 |
| 17401261 | Bcl2l15  | BCL2-like 15                                                       | 2.720006 | 2.686039 | 2.83744  | 3.114477 | 3.0932   | 2.606909 |
| 17214293 | Bcs1l    | BCS1-like (yeast)                                                  | 32.73336 | 39.62777 | 32.02574 | 33.28845 | 23.74859 | 32.88232 |

|          |            |                                                                                        |          |          |          |          |          |          |
|----------|------------|----------------------------------------------------------------------------------------|----------|----------|----------|----------|----------|----------|
| 17392322 | Bfsp1      | beaded filament structural protein 1, in lens-CP94                                     | 5.779361 | 6.551204 | 5.993588 | 8.743495 | 6.171709 | 7.336541 |
| 17530301 | Bfsp2      | beaded filament structural protein 2, phakinin                                         | 3.386394 | 3.849577 | 4.819488 | 3.273967 | 3.764191 | 4.454952 |
| 17269845 | Becn1      | beclin 1, autophagy related                                                            | 48.56416 | 46.91509 | 44.72067 | 46.22784 | 48.56416 | 54.0132  |
| 17233014 | Bend3      | BEN domain containing 3                                                                | 17.93219 | 21.44887 | 23.8279  | 20.56744 | 22.18803 | 22.69464 |
| 17448467 | Bend4      | BEN domain containing 4                                                                | 14.11063 | 9.05428  | 10.43147 | 10.51845 | 7.679487 | 9.379688 |
| 17416955 | Bend5      | BEN domain containing 5                                                                | 6.443256 | 6.337307 | 6.152531 | 4.978117 | 6.419273 | 6.273802 |
| 17222053 | Bend6      | BEN domain containing 6                                                                | 3.550691 | 5.051003 | 6.938674 | 4.440186 | 5.297274 | 4.715105 |
| 17366484 | Bend7      | BEN domain containing 7                                                                | 27.1013  | 32.9115  | 31.57082 | 26.36076 | 30.62313 | 32.46245 |
| 17254840 | Bzap1      | benzodiazepine receptor associated protein 1                                           | 6.497524 | 8.37663  | 6.19232  | 5.45765  | 5.848108 | 6.822072 |
| 17357236 | Bsc12      | Berardinelli-Seip congenital lipodystrophy 2 homolog (seipin)                          | 70.53219 | 72.6283  | 82.25834 | 81.22771 | 69.25758 | 74.44071 |
| 17362579 | Best1      | bestrophin 1                                                                           | 3.719942 | 3.883345 | 4.583215 | 4.256536 | 4.073503 | 4.075847 |
| 17511263 | Best2      | bestrophin 2                                                                           | 4.950348 | 6.438747 | 7.219255 | 5.826017 | 6.541539 | 6.7605   |
| 17237522 | Best3      | bestrophin 3                                                                           | 3.364962 | 3.169686 | 3.30697  | 3.205546 | 3.765053 | 3.464555 |
| 17324420 | St6gal1    | beta galactoside alpha 2,6 sialyltransferase 1                                         | 97.07918 | 93.89523 | 101.489  | 76.69763 | 110.1687 | 93.6119  |
| 17338599 | St6gal2    | beta galactoside alpha 2,6 sialyltransferase 2                                         | 4.18936  | 4.268946 | 4.141921 | 4.18936  | 4.518143 | 4.217944 |
| 17515551 | B3gat1     | beta-1,3-glucuronyltransferase 1 (glucuronosyltransferase P)                           | 19.49537 | 19.49537 | 19.49537 | 18.21582 | 20.18889 | 22.2279  |
| 17211445 | B3gat2     | beta-1,3-glucuronyltransferase 2 (glucuronosyltransferase S)                           | 5.989726 | 6.654268 | 6.603404 | 7.98864  | 7.710583 | 8.846949 |
| 17357306 | B3gat3     | beta-1,3-glucuronyltransferase 3 (glucuronosyltransferase I)                           | 49.22775 | 49.22775 | 49.28989 | 61.26028 | 49.22775 | 49.22775 |
| 17356339 | B4gat1     | beta-1,4-glucuronyltransferase 1                                                       | 25.1295  | 26.56436 | 30.22436 | 30.24406 | 27.77123 | 28.14936 |
| 17237937 | B4galnt1   | beta-1,4-N-acetyl-galactosaminyl transferase 1                                         | 68.31971 | 74.91538 | 89.699   | 78.17796 | 89.21968 | 68.46477 |
| 17268243 | B4galnt2   | beta-1,4-N-acetyl-galactosaminyl transferase 2                                         | 4.484478 | 4.477551 | 3.339703 | 4.020653 | 4.307826 | 3.625852 |
| 17470394 | B4galnt3   | beta-1,4-N-acetyl-galactosaminyl transferase 3                                         | 8.269213 | 6.218385 | 5.688113 | 7.340254 | 7.571504 | 7.169189 |
| 17484710 | B4galnt4   | beta-1,4-N-acetyl-galactosaminyl transferase 4                                         | 3.969067 | 5.029587 | 5.72855  | 6.036909 | 5.077611 | 5.644399 |
| 17375373 | B2m        | beta-2 microglobulin                                                                   | 3500.05  | 3543.968 | 3699.206 | 3444.145 | 3440.184 | 3525.641 |
| 17445044 | B3glct     | beta-3-glucosyltransferase                                                             | 10.4413  | 7.61709  | 9.385997 | 11.98768 | 8.134367 | 9.777462 |
| 17505938 | Bco1       | beta-carotene oxygenase 1                                                              | 19.93608 | 19.8572  | 22.49855 | 18.49649 | 18.49649 | 14.83991 |
| 17526820 | Bco2       | beta-carotene oxygenase 2                                                              | 32.60429 | 24.84046 | 24.78422 | 33.0686  | 33.13445 | 44.51223 |
| 17449585 | Btc        | betacellulin, epidermal growth factor family member                                    | 14.06931 | 12.99694 | 12.24313 | 13.08081 | 13.10313 | 11.78999 |
| 17331284 | Crybg3     | beta-gamma crystallin domain containing 3                                              | 25.02781 | 24.03092 | 24.10031 | 25.02781 | 20.81094 | 16.42476 |
| 17331306 | Crybg3     | beta-gamma crystallin domain containing 3                                              | 32.63572 | 21.48027 | 23.8279  | 20.39396 | 16.15938 | 18.2416  |
| 17295005 | Bhmt       | betaine-homocysteine methyltransferase                                                 | 11.34724 | 10.81559 | 10.74669 | 11.84544 | 10.14636 | 9.325622 |
| 17295017 | Bhmt2      | betaine-homocysteine methyltransferase 2                                               | 324.9131 | 309.7993 | 369.6894 | 379.5484 | 429.9217 | 398.7222 |
| 17423724 | Bhmt-ps1   | betaine-homocysteine methyltransferase, pseudogene 1                                   | 50.2374  | 36.67767 | 48.20865 | 66.32542 | 50.25482 | 71.33014 |
| 17298504 | Msmb       | beta-microseminoprotein                                                                | 5.366829 | 4.180426 | 3.49434  | 6.533291 | 4.336918 | 5.488188 |
| 17516837 | Bace1      | beta-site APP cleaving enzyme 1                                                        | 42.0945  | 48.01755 | 51.03093 | 39.73697 | 28.3951  | 40.56884 |
| 17327544 | Bace2      | beta-site APP-cleaving enzyme 2                                                        | 12.20144 | 13.75382 | 13.98637 | 11.94504 | 11.32328 | 11.26855 |
| 17359834 | Btrc       | beta-transducin repeat containing protein                                              | 52.42707 | 47.48467 | 48.30197 | 46.11327 | 39.21436 | 52.24098 |
| 17470457 | Bid        | BH3 interacting domain death agonist                                                   | 14.7776  | 13.13159 | 18.3147  | 14.55235 | 16.26896 | 14.55689 |
| 17241731 | Bicc1      | bicaudal C homolog 1 (Drosophila)                                                      | 23.24986 | 27.99952 | 25.49443 | 24.02043 | 25.49443 | 21.89531 |
| 17464514 | Bicc1      | bicaudal D homolog 1 (Drosophila)                                                      | 4.552819 | 4.782218 | 5.536714 | 6.865239 | 3.600407 | 6.253266 |
| 17287115 | Bicc2      | bicaudal D homolog 2 (Drosophila)                                                      | 17.09864 | 17.09864 | 18.20963 | 17.09864 | 12.59562 | 18.01854 |
| 17323042 | Bfar       | bifunctional apoptosis regulator                                                       | 61.11989 | 57.12103 | 59.96588 | 56.12182 | 61.11989 | 59.0977  |
| 17535558 | Bgn        | biglycan                                                                               | 400.9532 | 457.2058 | 530.0079 | 379.3091 | 233.9052 | 296.7841 |
| 17425221 | Baat       | bile acid-Coenzyme A: amino acid N-acyltransferase                                     | 278.5206 | 223.8657 | 195.0351 | 277.6455 | 266.557  | 232.9473 |
| 17375767 | Blvra      | biliverdin reductase A                                                                 | 34.00323 | 44.46012 | 36.8944  | 36.8944  | 37.29447 | 36.05606 |
| 17475580 | Blvrb      | biliverdin reductase B (flavin reductase (NADPH))                                      | 100.1432 | 120.4199 | 99.69851 | 101.4792 | 57.80771 | 67.90708 |
| 17473925 | Bsph1      | binder of sperm protein homolog 1                                                      | 2.33689  | 2.420844 | 2.074725 | 2.251849 | 2.251849 | 2.139524 |
| 17486659 | Bsph2      | binder of sperm protein homolog 2                                                      | 2.19544  | 3.775297 | 2.255364 | 2.625842 | 2.379997 | 2.625842 |
| 17246368 | Bloc1s1    | biogenesis of lysosomal organelles complex-1, subunit 1                                | 33.72181 | 35.16504 | 36.88392 | 39.37806 | 43.12851 | 41.00279 |
| 17365072 | Bloc1s2    | biogenesis of lysosomal organelles complex-1, subunit 2                                | 17.29916 | 25.45646 | 17.76973 | 15.58472 | 30.13128 | 15.57305 |
| 17370804 | Bloc1s2-ps | biogenesis of lysosomal organelles complex-1, subunit 2, pseudogene                    | 6.147629 | 7.334355 | 7.662897 | 13.8031  | 7.814535 | 9.646262 |
| 17487272 | Bloc1s3    | biogenesis of lysosomal organelles complex-1, subunit 3                                | 38.52572 | 35.72619 | 43.00045 | 35.19284 | 38.17298 | 40.40607 |
| 17447506 | Bloc1s4    | biogenesis of lysosomal organelles complex-1, subunit 4, cappuccino                    | 28.94154 | 26.89489 | 23.8279  | 23.35404 | 25.11104 | 23.8279  |
| 17291953 | Bloc1s5    | biogenesis of lysosomal organelles complex-1, subunit 5, muted                         | 14.72525 | 13.21578 | 13.69711 | 13.29222 | 13.37494 | 15.19042 |
| 17375526 | Bloc1s6    | biogenesis of lysosomal organelles complex-1, subunit 6, pallidin                      | 12.76375 | 14.65601 | 16.29943 | 12.55422 | 19.78657 | 16.29943 |
| 17390833 | Bloc1s6os  | biogenesis of lysosomal organelles complex-1, subunit 6, pallidin, opposite strand     | 4.019873 | 3.593401 | 2.920489 | 3.289846 | 3.289846 | 2.848357 |
| 17261439 | Bod1       | biorientation of chromosomes in cell division 1                                        | 8.009432 | 6.82666  | 6.287864 | 5.984456 | 6.119102 | 7.890737 |
| 17447757 | Bod1l      | biorientation of chromosomes in cell division 1-like                                   | 45.73003 | 45.03173 | 44.58449 | 47.96101 | 47.70902 | 47.96101 |
| 17298460 | Btd        | biotinidase                                                                            | 40.81705 | 36.21486 | 33.53347 | 40.39963 | 41.71516 | 34.53052 |
| 17286487 | Bphl       | biphenyl hydrolase-like (serine hydrolase, breast epithelial mucin-associated antigen) | 322.7918 | 259.8473 | 248.0367 | 308.8045 | 290.1892 | 299.4892 |
| 17330577 | Boc        | biregional cell adhesion molecule-related/down-regulated by oncogenes (Cdon) b         | 4.776719 | 4.662003 | 5.618987 | 5.111476 | 5.151312 | 4.810811 |
| 17220533 | Bpnt1      | bisphosphate 3-nucleotidase 1                                                          | 74.14307 | 83.33265 | 72.74318 | 79.3116  | 68.71009 | 77.07387 |
| 17393755 | Blcap      | bladder cancer associated protein homolog (human)                                      | 6.584619 | 7.267101 | 7.487012 | 10.08417 | 10.19458 | 7.12342  |
| 17253191 | Blmh       | bleomycin hydrolase                                                                    | 74.34274 | 67.09763 | 70.2346  | 69.20767 | 71.68404 | 74.48304 |
| 17463702 | Borcs5     | BLOC-1 related complex subunit 5                                                       | 24.87458 | 27.76162 | 27.49867 | 24.44013 | 19.62866 | 26.53032 |
| 17251500 | Borcs6     | BLOC-1 related complex subunit 6                                                       | 13.17645 | 16.99443 | 16.99443 | 15.50842 | 16.99443 | 16.56608 |
| 17360078 | Borcs7     | BLOC-1 related complex subunit 7                                                       | 12.44315 | 9.364552 | 9.005398 | 11.02128 | 8.826736 | 9.896923 |
| 17501818 | Borcs8     | BLOC-1 related complex subunit 8                                                       | 57.93888 | 67.07531 | 57.49761 | 55.9199  | 52.70288 | 45.7776  |
| 17318483 | Bop1       | block of proliferation 1                                                               | 39.61487 | 36.46777 | 35.36107 | 36.95941 | 34.56165 | 33.10162 |
| 17464580 | Bet1       | blocked early in transport 1 homolog (S. cerevisiae)                                   | 89.59958 | 56.00447 | 46.70904 | 60.98912 | 60.10987 | 54.39492 |
| 17497687 | Bet1l      | blocked early in transport 1 homolog (S. cerevisiae)-like                              | 25.37243 | 24.3576  | 24.7856  | 26.21172 | 26.08503 | 22.28591 |
| 17233104 | Bves       | blood vessel epicardial substance                                                      | 3.185235 | 3.828263 | 3.337806 | 3.339703 | 3.632015 | 3.951335 |
| 17270189 | Bloodlinc  | Bloodlinc, erythroid developmental long intergenic non-protein coding transcript       | 8.160344 | 7.627393 | 8.451164 | 6.128738 | 4.963026 | 6.351336 |
| 17492619 | Blm        | Bloom syndrome, RecQ helicase-like                                                     | 4.932264 | 5.12748  | 5.35672  | 5.485564 | 7.002548 | 5.470755 |
| 17367295 | Bmi1       | Bmi1 polycomb ring finger oncogene                                                     | 7.698994 | 7.698994 | 6.017357 | 6.906621 | 7.698994 | 8.445483 |
| 17348105 | Bambi      | BMP and activin membrane-bound inhibitor                                               | 16.78534 | 14.56012 | 9.059679 | 13.82675 | 18.13997 | 11.51402 |
| 17390808 | Bambi-ps1  | BMP and activin membrane-bound inhibitor, pseudogene (Xenopus laevis)                  | 12.14937 | 9.345553 | 15.25024 | 10.21098 | 10.72838 | 13.39423 |
| 17439481 | Bmp2k      | BMP2 inducible kinase                                                                  | 61.8525  | 82.82819 | 87.75929 | 60.63421 | 66.39672 | 60.1478  |
| 17515478 | Bmper      | BMP-binding endothelial regulator                                                      | 5.696082 | 6.171709 | 6.171709 | 4.801649 | 9.038855 | 6.599423 |
| 17470150 | Bms1       | BMS1 homolog, ribosome assembly protein (yeast)                                        | 50.28618 | 40.27967 | 36.43543 | 41.14    | 41.7114  | 40.75344 |
| 17545955 | Bmx        | BMX non-receptor tyrosine kinase                                                       | 5.036355 | 5.341149 | 5.150741 | 4.968327 | 4.911045 | 4.447609 |
| 17330875 | Bbx        | bobby sox homolog (Drosophila)                                                         | 22.11909 | 17.91294 | 20.51191 | 16.86289 | 15.2116  | 18.57422 |
| 17223261 | Boll       | bol, boule-like (Drosophila)                                                           | 2.576228 | 2.547885 | 2.67402  | 2.397681 | 2.782767 | 2.474951 |
| 17408001 | Bola1      | bolA-like 1 (E. coli)                                                                  | 17.41417 | 16.13286 | 18.59419 | 19.82089 | 15.81016 | 20.30003 |

|          |         |                                                                        |          |          |          |          |          |          |
|----------|---------|------------------------------------------------------------------------|----------|----------|----------|----------|----------|----------|
| 17483075 | Bola2   | bolA-like 2 (E. coli)                                                  | 25.27501 | 24.79367 | 26.05413 | 27.56107 | 25.22776 | 17.38559 |
| 17460073 | Bola3   | bolA-like 3 (E. coli)                                                  | 34.79553 | 45.29438 | 50.58894 | 53.18399 | 45.36098 | 48.40687 |
| 17535012 | Brs3    | bombesin-like receptor 3                                               | 5.946744 | 4.672517 | 4.647678 | 6.089062 | 3.87262  | 3.729055 |
| 17406737 | Bglap   | bone gamma carboxyglutamate protein                                    | 6.992896 | 5.317912 | 5.355124 | 6.241964 | 5.016392 | 5.73137  |
| 17406730 | Bglap2  | bone gamma-carboxyglutamate protein 2                                  | 10.99747 | 10.99747 | 11.87495 | 9.4484   | 10.99747 | 11.86697 |
| 17406718 | Bglap3  | bone gamma-carboxyglutamate protein 3                                  | 13.40984 | 11.188   | 11.70133 | 12.61773 | 12.3734  | 12.04832 |
| 17437198 | Bst1    | bone marrow stromal cell antigen 1                                     | 5.406032 | 6.581699 | 6.651686 | 7.067647 | 7.513994 | 6.763594 |
| 17510345 | Bst2    | bone marrow stromal cell antigen 2                                     | 427.0615 | 405.0623 | 557.984  | 402.0079 | 274.5281 | 353.7583 |
| 17308361 | Bmp1    | bone morphogenetic protein 1                                           | 84.52464 | 95.80905 | 110.6186 | 100.1182 | 111.0696 | 106.4299 |
| 17460545 | Bmp10   | bone morphogenetic protein 10                                          | 24.77495 | 17.63769 | 12.02104 | 17.39246 | 16.8428  | 18.85558 |
| 17539772 | Bmp15   | bone morphogenetic protein 15                                          | 5.268309 | 4.823198 | 5.968713 | 5.304843 | 6.011062 | 5.364784 |
| 17376677 | Bmp2    | bone morphogenetic protein 2                                           | 25.12427 | 28.34181 | 24.93638 | 36.7232  | 14.43351 | 25.22688 |
| 17439535 | Bmp3    | bone morphogenetic protein 3                                           | 6.455326 | 6.919223 | 6.76833  | 6.76833  | 7.508892 | 6.76833  |
| 17305709 | Bmp4    | bone morphogenetic protein 4                                           | 13.41839 | 12.74191 | 19.97689 | 10.77003 | 12.40896 | 13.79812 |
| 17519538 | Bmp5    | bone morphogenetic protein 5                                           | 25.90377 | 32.19289 | 27.91619 | 33.3448  | 14.92967 | 35.55499 |
| 17286682 | Bmp6    | bone morphogenetic protein 6                                           | 9.745053 | 10.92476 | 10.92476 | 9.380469 | 11.33545 | 16.55666 |
| 17395041 | Bmp7    | bone morphogenetic protein 7                                           | 14.80918 | 16.49092 | 13.71507 | 16.97547 | 18.94874 | 17.4996  |
| 17429674 | Bmp8a   | bone morphogenetic protein 8a                                          | 9.806104 | 9.782749 | 8.713063 | 12.77525 | 11.75938 | 8.514548 |
| 17418141 | Bmp8b   | bone morphogenetic protein 8b                                          | 8.776222 | 6.258383 | 10.23784 | 5.477699 | 4.632176 | 4.933085 |
| 17305042 | Bmpr1a  | bone morphogenetic protein receptor, type 1A                           | 61.17075 | 57.01699 | 77.59921 | 62.02767 | 58.24773 | 64.22798 |
| 17410729 | Bmpr1b  | bone morphogenetic protein receptor, type 1B                           | 3.494946 | 2.75704  | 3.009972 | 3.386512 | 2.845732 | 3.212174 |
| 17213321 | Bmpr2   | bone morphogenetic protein receptor, type II (serine/threonine kinase) | 287.5582 | 292.2015 | 319.11   | 280.5628 | 214.082  | 236.6301 |
| 17213336 | Bmpr2   | bone morphogenetic protein receptor, type II (serine/threonine kinase) | 40.39794 | 39.64728 | 39.24835 | 48.8911  | 34.58993 | 43.9966  |
| 17218044 | Brinp3  | bone morphogenetic protein/retinoic acid inducible neural specific 3   | 4.383369 | 4.539206 | 3.442914 | 4.012246 | 3.157363 | 4.394777 |
| 17426434 | Brinp1  | bone morphogenetic protein/retinoic acid inducible neural specific 1   | 6.068626 | 7.230824 | 6.33823  | 7.494592 | 6.625136 | 7.351099 |
| 17228656 | Brinp2  | bone morphogenetic protein/retinoic acid inducible neural-specific 2   | 9.744715 | 12.54873 | 9.310251 | 10.5666  | 9.277139 | 9.744715 |
| 17302362 | Bora    | bora, aurora kinase A activator                                        | 3.838227 | 3.838227 | 3.292104 | 3.752937 | 3.142146 | 3.838227 |
| 17378125 | Bpifa1  | BPI fold containing family A, member 1                                 | 3.189765 | 2.947517 | 3.036354 | 3.03707  | 2.678899 | 3.301176 |
| 17378104 | Bpifa2  | BPI fold containing family A, member 2                                 | 5.007221 | 5.266301 | 4.28546  | 3.828104 | 4.339353 | 4.9283   |
| 17378116 | Bpifa3  | BPI fold containing family A, member 3                                 | 5.344148 | 5.137548 | 5.48933  | 5.289642 | 4.124817 | 5.983253 |
| 17378138 | Bpifa5  | BPI fold containing family A, member 5                                 | 3.339565 | 3.220512 | 3.400342 | 3.411296 | 3.27617  | 3.176967 |
| 17378092 | Bpifa6  | BPI fold containing family A, member 6                                 | 2.283236 | 2.42034  | 2.467431 | 2.521811 | 2.467431 | 2.072138 |
| 17378149 | Bpifb1  | BPI fold containing family B, member 1                                 | 3.70553  | 3.256788 | 3.727323 | 3.301679 | 3.090007 | 3.182962 |
| 17378017 | Bpifb2  | BPI fold containing family B, member 2                                 | 4.315088 | 4.801649 | 5.215191 | 5.145602 | 4.801516 | 6.998133 |
| 17378053 | Bpifb3  | BPI fold containing family B, member 3                                 | 3.954266 | 5.207244 | 4.759335 | 3.746179 | 5.239104 | 4.821493 |
| 17378072 | Bpifb4  | BPI fold containing family B, member 4                                 | 4.326169 | 4.212422 | 4.171077 | 4.067155 | 3.867738 | 4.016197 |
| 17378168 | Bpifb5  | BPI fold containing family B, member 5                                 | 5.597218 | 5.993298 | 5.851514 | 5.186603 | 5.703312 | 5.461851 |
| 17378035 | Bpifb6  | BPI fold containing family B, member 6                                 | 4.175329 | 3.99745  | 3.903342 | 4.265929 | 4.085747 | 4.251818 |
| 17378184 | Bpifb9a | BPI fold containing family B, member 9A                                | 15.21666 | 18.03078 | 14.84495 | 15.30637 | 14.7514  | 15.84527 |
| 17378200 | Bpifb9b | BPI fold containing family B, member 9B                                | 11.13215 | 13.80664 | 13.04179 | 10.55116 | 12.49821 | 13.85524 |
| 17243693 | Bpifc   | BPI fold containing family C                                           | 2.755702 | 2.49789  | 2.731891 | 2.769701 | 2.366295 | 2.486006 |
| 17473341 | Brsk1   | BR serine/threonine kinase 1                                           | 5.253905 | 5.913532 | 5.197039 | 5.798581 | 6.059211 | 5.010415 |
| 17485152 | Brsk2   | BR serine/threonine kinase 2                                           | 4.339263 | 3.19264  | 3.030992 | 3.886846 | 4.067268 | 3.589592 |
| 17333121 | T       | brachyury                                                              | 6.506673 | 5.781925 | 5.799948 | 5.839197 | 7.479491 | 5.908861 |
| 17333107 | T2      | brachyury 2                                                            | 4.275313 | 3.870527 | 3.916052 | 4.001109 | 3.707843 | 4.719356 |
| 17278404 | Bdkrb1  | bradykinin receptor, beta 1                                            | 3.270611 | 3.307176 | 3.116183 | 3.266283 | 2.782362 | 3.48382  |
| 17278398 | Bdkrb2  | bradykinin receptor, beta 2                                            | 7.20316  | 6.836889 | 6.553656 | 6.056272 | 6.111515 | 6.064211 |
| 17466168 | Braf    | Braf transforming gene                                                 | 66.93273 | 93.41291 | 85.21527 | 69.08162 | 68.55167 | 71.55546 |
| 17316175 | Basp1   | brain abundant, membrane attached signal protein 1                     | 28.9243  | 32.10353 | 27.44174 | 27.37335 | 30.56122 | 36.24977 |
| 17311173 | Baalc   | brain and acute leukemia, cytoplasmic                                  | 4.322183 | 3.722418 | 3.722418 | 4.486779 | 4.844239 | 4.20927  |
| 17436210 | Bre     | brain and reproductive organ-expressed protein                         | 53.50938 | 58.31843 | 65.9989  | 58.05708 | 56.73865 | 53.74617 |
| 17374077 | Bdnf    | brain derived neurotrophic factor                                      | 5.484956 | 5.360398 | 4.20927  | 6.969717 | 6.56698  | 5.484956 |
| 17544734 | Bex1    | brain expressed gene 1                                                 | 2.895816 | 2.537381 | 2.953407 | 2.953407 | 2.935772 | 2.953407 |
| 17537878 | Bex4    | brain expressed gene 4                                                 | 3.39509  | 2.574853 | 2.441301 | 2.660726 | 4.618358 | 2.78134  |
| 17324745 | Bex6    | brain expressed gene 6                                                 | 3.219842 | 3.074539 | 3.084293 | 2.326159 | 3.045354 | 3.632568 |
| 17368171 | Bmyc    | brain expressed myelocytomatosis oncogene                              | 26.16307 | 34.82014 | 28.56447 | 33.90556 | 37.59685 | 32.93227 |
| 17544691 | Bex2    | brain expressed X-linked 2                                             | 12.3566  | 8.127322 | 12.08571 | 10.83998 | 9.59046  | 10.48148 |
| 17504413 | Bean1   | brain expressed, associated with Nedd4, 1                              | 8.445718 | 7.32262  | 7.799437 | 8.512542 | 9.04763  | 8.257585 |
| 17377498 | Pygb    | brain glycogen phosphorylase                                           | 24.90131 | 28.88723 | 26.89806 | 20.70719 | 24.90131 | 18.09125 |
| 17444486 | Bri3    | brain protein I3                                                       | 12.8014  | 10.43978 | 10.44224 | 11.15749 | 10.33646 | 10.53538 |
| 17516385 | Bsx     | brain specific homeobox                                                | 16.75593 | 16.94197 | 16.32702 | 20.22657 | 16.51334 | 17.75877 |
| 17283947 | Begain  | brain-enriched guanylate kinase-associated                             | 9.19666  | 6.284552 | 9.385346 | 7.767014 | 6.883441 | 6.297023 |
| 17259235 | Baiap2  | brain-specific angiogenesis inhibitor 1-associated protein 2           | 48.54867 | 41.8716  | 42.19763 | 50.1612  | 54.77023 | 36.71633 |
| 17472678 | Bcat1   | branched chain aminotransferase 1, cytosolic                           | 4.590241 | 4.737251 | 3.9324   | 4.280561 | 3.540149 | 3.95328  |
| 17477897 | Bcat2   | branched chain aminotransferase 2, mitochondrial                       | 14.79502 | 20.87754 | 19.36715 | 24.84924 | 16.48783 | 23.86824 |
| 17487982 | Bckdha  | branched chain ketoacid dehydrogenase E1, alpha polypeptide            | 213.0193 | 205.4723 | 206.2056 | 226.4251 | 242.3822 | 236.3466 |
| 17519940 | Bckdhb  | branched chain ketoacid dehydrogenase E1, beta polypeptide             | 141.959  | 157.9627 | 157.1012 | 146.961  | 161.5526 | 166.3387 |
| 17483516 | Bckdk   | branched chain ketoacid dehydrogenase kinase                           | 38.49449 | 32.95008 | 39.53531 | 43.72147 | 41.02155 | 37.98821 |
| 17351133 | Bvht    | braveheart long non-coding RNA                                         | 3.339703 | 3.272039 | 3.035912 | 4.20927  | 5.019626 | 4.495495 |
| 17441952 | Brp     | BRCA1 associated protein                                               | 221.389  | 305.9559 | 296.1902 | 265.9148 | 263.1607 | 302.6088 |
| 17298407 | Bap1    | Brca1 associated protein 1                                             | 35.16187 | 33.36492 | 31.42912 | 34.07567 | 33.80278 | 31.24817 |
| 17223999 | Bard1   | BRCA1 associated RING domain 1                                         | 4.611512 | 3.99709  | 3.703322 | 3.896773 | 5.120306 | 3.883991 |
| 17267209 | Brip1   | BRCA1 interacting protein C-terminal helicase 1                        | 5.018444 | 4.352065 | 4.352065 | 4.352065 | 4.352065 | 4.00991  |
| 17254618 | Brip1os | BRCA1 interacting protein C-terminal helicase 1, opposite strand       | 11.00136 | 11.45504 | 10.66876 | 11.67208 | 11.17978 | 12.50333 |
| 17535957 | Brcc3   | BRCA1/BRCA2-containing complex, subunit 3                              | 46.58714 | 47.92977 | 46.92679 | 47.95502 | 50.83076 | 51.69311 |
| 17444117 | Brat1   | BRCA1-associated ATM activator 1                                       | 20.36161 | 20.42126 | 23.90748 | 18.5287  | 19.20513 | 21.86589 |
| 17484140 | Bccip   | BRCA2 and CDKN1A interacting protein                                   | 53.75846 | 51.52033 | 52.54895 | 60.70023 | 52.09453 | 66.76083 |
| 17234289 | Bcr     | breakpoint cluster region                                              | 62.49115 | 60.32608 | 61.28194 | 59.41972 | 52.44088 | 49.73501 |
| 17269921 | Brca1   | breast cancer 1, early onset                                           | 5.919642 | 5.362627 | 5.342778 | 6.226839 | 5.84357  | 5.48933  |
| 17445162 | Brca2   | breast cancer 2, early onset                                           | 6.266761 | 6.819755 | 8.479446 | 7.698994 | 7.074362 | 8.934209 |
| 17513158 | Bcar1   | breast cancer anti-estrogen resistance 1                               | 44.95189 | 48.05085 | 51.11341 | 43.68815 | 50.25447 | 52.0754  |
| 17402305 | Bcar3   | breast cancer anti-estrogen resistance 3                               | 109.2925 | 91.56219 | 88.42792 | 84.35607 | 67.94851 | 88.42792 |
| 17356344 | Brms1   | breast cancer metastasis-suppressor 1                                  | 27.71413 | 29.7779  | 27.96674 | 31.39929 | 31.75166 | 30.44345 |
| 17275576 | Brms1l  | breast cancer metastasis-suppressor 1-like                             | 15.61889 | 14.57294 | 16.21481 | 16.38973 | 12.36723 | 15.881   |

|          |           |                                                                                     |          |          |          |          |          |          |
|----------|-----------|-------------------------------------------------------------------------------------|----------|----------|----------|----------|----------|----------|
| 17394943 | Bcas1     | breast carcinoma amplified sequence 1                                               | 3.396738 | 4.413123 | 3.48353  | 4.217681 | 3.968187 | 4.34697  |
| 17380040 | Bcas1os1  | breast carcinoma amplified sequence 1, opposite strand 1 [Source:MGI Symbol;Ac      | 3.424112 | 3.547444 | 5.120306 | 3.674403 | 3.298157 | 4.220606 |
| 17380031 | Bcas1os2  | breast carcinoma amplified sequence 1, opposite strand 2                            | 5.986364 | 5.273534 | 5.406894 | 6.534741 | 5.113673 | 6.074771 |
| 17401169 | Bcas2     | breast carcinoma amplified sequence 2                                               | 44.1573  | 50.69565 | 55.2568  | 58.41634 | 65.05148 | 65.60255 |
| 17254547 | Bcas3     | breast carcinoma amplified sequence 3                                               | 42.27462 | 35.83506 | 38.62545 | 41.30373 | 43.80853 | 34.85056 |
| 17267186 | Bcas3os2  | breast carcinoma amplified sequence 3 opposite strand 2                             | 7.042414 | 5.95095  | 6.952106 | 6.222093 | 7.08894  | 6.646432 |
| 17267174 | Bcas3os1  | breast carcinoma amplified sequence 3, opposite strand 1                            | 3.758195 | 3.420673 | 4.608477 | 3.472441 | 3.694579 | 3.690279 |
| 17406629 | Bcan      | brevican                                                                            | 4.990831 | 5.848027 | 4.880639 | 5.31747  | 4.456249 | 5.427847 |
| 17284290 | Brf1      | BRF1 homolog, subunit of RNA polymerase III transcription initiation factor IIIB (S | 24.54011 | 27.34945 | 26.63571 | 31.22825 | 33.3448  | 30.66498 |
| 17508516 | Brf2      | BRF2, subunit of RNA polymerase III transcription initiation factor, BRF1-like      | 8.874218 | 9.398171 | 12.16345 | 11.27871 | 10.37997 | 10.06636 |
| 17442714 | Bri3bp    | Bri3 binding protein                                                                | 64.98613 | 65.0321  | 75.55891 | 70.41008 | 54.44358 | 59.10876 |
| 17334266 | Bricd5    | BRICHOS domain containing 5                                                         | 4.834813 | 5.615911 | 7.950524 | 5.53165  | 6.576363 | 8.630655 |
| 17461793 | Brk1      | BRICK1, SCAR/WAVE actin-nucleating complex subunit                                  | 81.64994 | 89.79418 | 89.968   | 70.74469 | 78.25223 | 90.97448 |
| 17349283 | Bin1      | bridging integrator 1                                                               | 22.50463 | 22.61519 | 21.19556 | 24.36655 | 19.55547 | 22.61519 |
| 17321768 | Bin2      | bridging integrator 2                                                               | 19.43358 | 15.51692 | 24.21401 | 15.32452 | 14.31653 | 12.07558 |
| 17301722 | Bin3      | bridging integrator 3                                                               | 57.59693 | 56.6416  | 51.10668 | 58.82796 | 61.30233 | 67.33945 |
| 17502168 | Babam1    | BRISC and BRCA1 A complex member 1                                                  | 141.3139 | 148.7401 | 166.8028 | 147.6922 | 113.482  | 149.7612 |
| 17230651 | Brox      | BRO1 domain and CAAX motif containing                                               | 44.511   | 43.60707 | 34.52382 | 39.38188 | 39.09846 | 40.90457 |
| 17374669 | Bahd1     | bromo adjacent homology domain containing 1                                         | 17.09864 | 19.36621 | 19.22844 | 19.04394 | 17.35164 | 20.75749 |
| 17281148 | Baz1a     | bromodomain adjacent to zinc finger domain 1A                                       | 32.28249 | 31.44655 | 28.73267 | 30.9151  | 24.48048 | 24.75006 |
| 17443231 | Baz1b     | bromodomain adjacent to zinc finger domain, 1B                                      | 68.69913 | 66.37969 | 81.041   | 66.86874 | 59.32055 | 61.94646 |
| 17238245 | Baz2a     | bromodomain adjacent to zinc finger domain, 2A                                      | 48.41023 | 56.80279 | 62.31942 | 62.73593 | 59.1723  | 49.74157 |
| 17385508 | Baz2b     | bromodomain adjacent to zinc finger domain, 2B                                      | 23.20478 | 24.72125 | 23.39568 | 25.60724 | 22.90689 | 25.73143 |
| 17461606 | Brpf1     | bromodomain and PHD finger containing, 1                                            | 19.29145 | 19.86174 | 18.08322 | 15.31666 | 24.58182 | 26.94751 |
| 17335398 | Brpf3     | bromodomain and PHD finger containing, 3                                            | 20.0243  | 22.8712  | 23.0405  | 18.14777 | 21.78284 | 20.19715 |
| 17323295 | Brwd1     | bromodomain and WD repeat domain containing 1                                       | 32.25431 | 33.55812 | 29.32563 | 33.28176 | 28.71554 | 34.05512 |
| 17544102 | Brwd3     | bromodomain and WD repeat domain containing 3                                       | 20.57956 | 22.51914 | 20.57956 | 21.1615  | 21.1615  | 25.15686 |
| 17320163 | Brd1      | bromodomain containing 1                                                            | 26.55258 | 28.5253  | 22.6915  | 23.56396 | 23.44275 | 28.61739 |
| 17343768 | Brd2      | bromodomain containing 2                                                            | 64.41836 | 65.56118 | 53.61965 | 50.96129 | 51.25852 | 58.56675 |
| 17383320 | Brd3      | bromodomain containing 3                                                            | 44.45488 | 48.68988 | 47.81297 | 52.38747 | 43.42127 | 50.24437 |
| 17343344 | Brd4      | bromodomain containing 4                                                            | 66.09366 | 78.2799  | 88.13481 | 73.10712 | 65.469   | 69.71465 |
| 17511509 | Brd7      | bromodomain containing 7                                                            | 53.48899 | 53.09448 | 50.61559 | 50.12332 | 53.58621 | 53.09448 |
| 17353462 | Brd8      | bromodomain containing 8                                                            | 22.52492 | 21.97589 | 19.39738 | 21.97589 | 28.52708 | 22.13995 |
| 17288585 | Brd9      | bromodomain containing 9                                                            | 30.93954 | 32.8404  | 32.8404  | 33.13514 | 36.62838 | 33.48702 |
| 17271051 | Bptf      | bromodomain PHD finger transcription factor                                         | 52.18669 | 53.39305 | 42.85139 | 48.34819 | 54.60571 | 48.6946  |
| 17439997 | Brdt      | bromodomain, testis-specific                                                        | 4.361154 | 3.815283 | 4.090423 | 4.801649 | 3.958462 | 4.654641 |
| 17512765 | Lncbate1  | brown adipose tissue enriched long non-coding RNA 1                                 | 6.28281  | 6.751462 | 7.210553 | 7.528018 | 8.157743 | 9.652951 |
| 17544491 | Btk       | Bruton agammaglobulinemia tyrosine kinase                                           | 5.637713 | 5.915582 | 6.317046 | 4.379846 | 10.61248 | 7.475292 |
| 17315960 | Brix1     | BRX1, biogenesis of ribosomes, homolog (S. cerevisiae)                              | 127.7757 | 80.8564  | 90.19778 | 79.83614 | 102.3913 | 87.42718 |
| 17418999 | Bsdcl     | BSD domain containing 1                                                             | 51.94129 | 55.44325 | 54.0945  | 55.11221 | 59.20635 | 56.6153  |
| 17358962 | Btaf1     | BATAF RNA polymerase II, B-TFIID transcription factor-associated, (Mot1 homolog     | 54.15978 | 47.59803 | 39.37505 | 45.29438 | 38.18648 | 40.50337 |
| 17492847 | Btbd1     | BTB (POZ) domain containing 1                                                       | 99.52175 | 109.9078 | 93.88938 | 89.26545 | 90.8113  | 93.44334 |
| 17495523 | Btbd10    | BTB (POZ) domain containing 10                                                      | 6.812291 | 5.402136 | 5.373976 | 6.287864 | 6.606472 | 5.855125 |
| 17236102 | Btbd11    | BTB (POZ) domain containing 11                                                      | 6.992896 | 8.021377 | 7.689235 | 6.992896 | 7.042414 | 6.992896 |
| 17483870 | Btbd16    | BTB (POZ) domain containing 16                                                      | 3.835993 | 5.013055 | 4.766235 | 4.79636  | 4.854424 | 4.917619 |
| 17271700 | Btbd17    | BTB (POZ) domain containing 17                                                      | 5.015801 | 6.992896 | 6.734823 | 6.171709 | 6.287864 | 6.250363 |
| 17372578 | Btbd18    | BTB (POZ) domain containing 18                                                      | 10.39891 | 8.778716 | 8.536768 | 8.927585 | 8.038075 | 8.708957 |
| 17428752 | Btbd19    | BTB (POZ) domain containing 19                                                      | 9.050641 | 7.032268 | 9.443686 | 7.109657 | 8.247918 | 9.42028  |
| 17428763 | Btbd19    | BTB (POZ) domain containing 19                                                      | 6.379264 | 8.729385 | 6.912224 | 8.605088 | 6.605236 | 6.434464 |
| 17243022 | Btbd2     | BTB (POZ) domain containing 2                                                       | 51.68773 | 57.26731 | 56.64906 | 65.07223 | 52.67038 | 66.64801 |
| 17376867 | Btbd3     | BTB (POZ) domain containing 3                                                       | 7.375291 | 6.675195 | 7.508475 | 7.482809 | 7.450566 | 7.580011 |
| 17279427 | Btbd6     | BTB (POZ) domain containing 6                                                       | 38.50089 | 31.47905 | 36.7479  | 31.60345 | 33.34457 | 37.30482 |
| 17283487 | Btbd7     | BTB (POZ) domain containing 7                                                       | 33.00791 | 33.57906 | 33.30461 | 32.32257 | 37.39569 | 32.76242 |
| 17440042 | Btbd8     | BTB (POZ) domain containing 8                                                       | 8.389297 | 8.447942 | 7.388134 | 8.016153 | 8.016153 | 6.632901 |
| 17343119 | Btbd9     | BTB (POZ) domain containing 9                                                       | 27.82173 | 33.14938 | 35.93655 | 28.73804 | 29.79627 | 28.77711 |
| 17326895 | Bach1     | BTB and CNC homology 1                                                              | 67.81112 | 58.29297 | 61.10083 | 61.77024 | 59.477   | 62.39636 |
| 17412374 | Bach2     | BTB and CNC homology 2                                                              | 9.492184 | 13.05246 | 13.90498 | 15.57262 | 9.616621 | 12.4796  |
| 17412395 | Bach2     | BTB and CNC homology 2                                                              | 3.310938 | 3.7126   | 3.714788 | 3.677512 | 3.459995 | 3.669338 |
| 17423741 | Bach2os   | BTB and CNC homology 2, opposite strand                                             | 6.112659 | 6.395823 | 5.979356 | 6.614536 | 5.271158 | 5.567887 |
| 17506332 | Banp      | BTG3 associated nuclear protein                                                     | 30.04723 | 25.02607 | 26.99462 | 21.3452  | 27.87442 | 20.78672 |
| 17516938 | Bud13     | BUD13 homolog (yeast)                                                               | 19.60174 | 21.57951 | 17.38306 | 19.18597 | 18.09401 | 23.4865  |
| 17444628 | Bud31     | BUD31 homolog (yeast)                                                               | 26.35619 | 20.7237  | 17.28118 | 21.36148 | 19.66775 | 21.78087 |
| 17391376 | Bub1      | budding uninhibited by benzimidazoles 1 homolog (S. cerevisiae)                     | 2.387946 | 2.853119 | 2.740274 | 3.168193 | 3.601181 | 3.132946 |
| 17374569 | Bub1b     | budding uninhibited by benzimidazoles 1 homolog, beta (S. cerevisiae)               | 4.978531 | 5.780603 | 5.780603 | 5.671892 | 5.649331 | 5.780603 |
| 17484040 | Bub3      | budding uninhibited by benzimidazoles 3 homolog (S. cerevisiae)                     | 100.3614 | 82.90976 | 92.65584 | 80.05114 | 85.48267 | 72.62075 |
| 17389144 | Bbox1     | butyrobetaine (gamma), 2-oxoglutarate dioxygenase 1 (gamma-butyrobetaine hyd        | 331.6229 | 326.1993 | 286.613  | 323.0223 | 262.8599 | 325.8739 |
| 17291146 | Btn1a1    | butyrophilin, subfamily 1, member A1                                                | 5.364263 | 4.831764 | 5.051038 | 4.886969 | 3.879713 | 5.673818 |
| 17291158 | Btn2a2    | butyrophilin, subfamily 2, member A2                                                | 3.475836 | 4.908697 | 5.592177 | 4.190203 | 4.36058  | 4.712916 |
| 17336526 | Btnl1     | butyrophilin-like 1                                                                 | 3.482178 | 3.523307 | 3.590787 | 2.953407 | 4.153046 | 3.092514 |
| 17250149 | Btnl10    | butyrophilin-like 10                                                                | 6.601848 | 6.115625 | 5.398805 | 5.566807 | 4.872898 | 6.026457 |
| 17336516 | Btnl2     | butyrophilin-like 2                                                                 | 7.539036 | 8.73574  | 7.801816 | 7.553682 | 8.151525 | 8.647781 |
| 17343834 | Btn4      | butyrophilin-like 4                                                                 | 4.012941 | 6.106179 | 6.807287 | 6.198976 | 5.549124 | 5.80401  |
| 17343856 | Btnl5-ps  | butyrophilin-like 5, pseudogene                                                     | 2.861755 | 3.219463 | 4.206382 | 2.47574  | 4.330669 | 5.442917 |
| 17343865 | Btnl7-ps  | butyrophilin-like 7, pseudogene                                                     | 3.528634 | 3.54506  | 2.417926 | 2.656838 | 3.453191 | 2.606909 |
| 17262259 | Btnl9     | butyrophilin-like 9                                                                 | 18.7304  | 15.09888 | 18.2373  | 17.09734 | 15.26388 | 11.70019 |
| 17405908 | Bche      | butyrylcholinesterase                                                               | 157.4184 | 149.1314 | 183.6443 | 162.946  | 193.9109 | 185.9731 |
| 17345696 | Bysl      | bystin-like                                                                         | 31.91892 | 21.29481 | 19.70172 | 16.16353 | 20.13286 | 17.60301 |
| 17247471 | C1d       | C1D nuclear receptor co-repressor                                                   | 12.59553 | 11.90809 | 12.48358 | 13.26451 | 12.50463 | 11.01845 |
| 17541217 | C1galt1c1 | C1GALT1-specific chaperone 1                                                        | 19.27087 | 15.93934 | 14.02423 | 13.74276 | 13.87946 | 17.35128 |
| 17258902 | C1qtnf1   | C1q and tumor necrosis factor related protein 1                                     | 19.35964 | 18.27577 | 18.0994  | 19.68957 | 16.34684 | 15.0992  |
| 17248613 | C1qtnf2   | C1q and tumor necrosis factor related protein 2                                     | 5.694188 | 5.901043 | 5.972438 | 5.901043 | 5.500108 | 7.504833 |
| 17310339 | C1qtnf3   | C1q and tumor necrosis factor related protein 3                                     | 2.873084 | 3.458676 | 3.881784 | 2.941659 | 2.448215 | 2.49239  |
| 17373105 | C1qtnf4   | C1q and tumor necrosis factor related protein 4                                     | 32.37392 | 37.14433 | 36.61036 | 31.6846  | 29.29556 | 35.37112 |
| 17516488 | C1qtnf5   | C1q and tumor necrosis factor related protein 5                                     | 8.134592 | 8.497273 | 9.014828 | 10.76339 | 8.807973 | 10.27616 |

|          |               |                                                                               |          |          |          |          |          |          |
|----------|---------------|-------------------------------------------------------------------------------|----------|----------|----------|----------|----------|----------|
| 17319022 | C1qtnf6       | C1q and tumor necrosis factor related protein 6                               | 8.762424 | 9.682301 | 11.42324 | 9.372345 | 8.217446 | 8.795405 |
| 17437148 | C1qtnf7       | C1q and tumor necrosis factor related protein 7                               | 3.703322 | 3.703322 | 3.352971 | 3.703322 | 3.729055 | 4.863989 |
| 17301055 | C1qtnf9       | C1q and tumor necrosis factor related protein 9                               | 7.148844 | 7.584531 | 6.017733 | 7.089383 | 6.394848 | 7.639562 |
| 17381774 | C1ql3         | C1q-like 3                                                                    | 9.123011 | 12.53422 | 12.2028  | 12.34342 | 12.10952 | 14.31623 |
| 17332628 | C2cd2         | C2 calcium-dependent domain containing 2                                      | 152.1942 | 182.1584 | 164.3457 | 159.175  | 120.4024 | 161.7677 |
| 17526206 | C2cd2l        | C2 calcium-dependent domain containing 2-like                                 | 70.81534 | 48.48108 | 60.50993 | 53.74356 | 52.04256 | 52.17331 |
| 17480691 | C2cd3         | C2 calcium-dependent domain containing 3                                      | 22.22991 | 25.70202 | 28.62989 | 25.70202 | 23.83732 | 24.53195 |
| 17528532 | C2cd4a        | C2 calcium-dependent domain containing 4A                                     | 8.51685  | 10.45101 | 8.51685  | 7.767121 | 5.653013 | 8.51685  |
| 17518813 | C2cd4b        | C2 calcium-dependent domain containing 4B                                     | 8.708112 | 10.02243 | 9.75012  | 11.26738 | 14.03834 | 9.619621 |
| 17242624 | C2cd4c        | C2 calcium-dependent domain containing 4C                                     | 16.31763 | 16.95243 | 15.37197 | 17.91145 | 17.48396 | 17.12676 |
| 17400043 | C2cd4d        | C2 calcium-dependent domain containing 4D                                     | 16.84397 | 21.26059 | 16.66905 | 13.28052 | 15.51466 | 17.37884 |
| 17472598 | C2cd5         | C2 calcium-dependent domain containing 5                                      | 17.16526 | 15.77436 | 18.6537  | 15.14952 | 15.22436 | 14.85967 |
| 17465115 | Cadps2        | Ca2+-dependent activator protein for secretion 2                              | 22.02103 | 17.11821 | 15.387   | 18.33439 | 18.4751  | 18.52973 |
| 17303504 | Cadps         | Ca2+-dependent secretion activator                                            | 4.925704 | 4.360217 | 4.422708 | 4.062844 | 4.495121 | 4.360338 |
| 17541776 | Cox1a         | CAAX box 1A                                                                   | 2.287418 | 1.784253 | 2.465329 | 2.083357 | 3.353668 | 2.287418 |
| 17541780 | Cox1b         | CAAX box 1B                                                                   | 15.46087 | 16.71081 | 44.00849 | 16.37247 | 13.64537 | 12.97893 |
| 17534746 | Cox1c         | CAAX box 1C                                                                   | 5.145709 | 5.066502 | 6.009771 | 5.066502 | 5.066502 | 5.114843 |
| 17369555 | Abl1          | c-abl oncogene 1, non-receptor tyrosine kinase                                | 14.37958 | 14.37958 | 16.23516 | 12.03697 | 11.7877  | 10.95897 |
| 17415863 | Cachd1        | cache domain containing 1                                                     | 15.50412 | 14.06795 | 15.63774 | 11.85053 | 9.750864 | 14.03736 |
| 17235682 | Cactin        | cactin, spliceosome C complex subunit                                         | 20.60325 | 21.4755  | 21.04988 | 22.90245 | 21.76156 | 23.82179 |
| 17505148 | Cdh1          | cadherin 1                                                                    | 112.4407 | 74.51402 | 81.04437 | 94.00594 | 90.07844 | 79.76368 |
| 17310530 | Cdh10         | cadherin 10                                                                   | 3.234584 | 2.943617 | 3.062861 | 2.732649 | 3.282602 | 3.677282 |
| 17512153 | Cdh11         | cadherin 11                                                                   | 7.674219 | 9.066527 | 8.401343 | 9.142065 | 8.415156 | 7.76061  |
| 17499676 | 2610005L07Rik | cadherin 11 pseudogene                                                        | 3.919746 | 5.780603 | 4.20927  | 4.27804  | 3.926843 | 3.416976 |
| 17507872 | 2610005L07Rik | cadherin 11 pseudogene                                                        | 12.6929  | 16.64527 | 19.54313 | 21.33174 | 15.48136 | 18.61857 |
| 17507851 | 6820431F20Rik | cadherin 11 pseudogene                                                        | 243.6084 | 277.8726 | 254.2229 | 261.1781 | 235.6775 | 271.5925 |
| 17310550 | Cdh12         | cadherin 12                                                                   | 3.184838 | 2.347036 | 2.581    | 2.738679 | 3.003428 | 2.55923  |
| 17506042 | Cdh13         | cadherin 13                                                                   | 9.527845 | 8.402275 | 9.1294   | 9.527845 | 10.4116  | 8.908978 |
| 17506460 | Cdh15         | cadherin 15                                                                   | 7.83395  | 8.151695 | 8.652458 | 10.61483 | 8.652458 | 12.0657  |
| 17512299 | Cdh16         | cadherin 16                                                                   | 5.677241 | 7.690727 | 5.327689 | 6.479085 | 5.177659 | 6.308294 |
| 17411848 | Cdh17         | cadherin 17                                                                   | 3.802531 | 4.004383 | 3.756711 | 4.076271 | 4.623675 | 3.98594  |
| 17310565 | Cdh18         | cadherin 18                                                                   | 7.506914 | 10.88546 | 7.849877 | 8.546952 | 9.52527  | 8.86389  |
| 17226127 | Cdh19         | cadherin 19, type 2                                                           | 2.516276 | 2.782863 | 2.624695 | 3.042991 | 2.516276 | 2.072138 |
| 17352884 | Cdh2          | cadherin 2                                                                    | 222.1807 | 220.9154 | 214.9698 | 203.1287 | 213.1699 | 211.517  |
| 17216280 | Cdh20         | cadherin 20                                                                   | 4.362636 | 4.786032 | 3.836791 | 4.362636 | 4.576612 | 4.487121 |
| 17394366 | Cdh22         | cadherin 22                                                                   | 9.606827 | 10.75332 | 9.606827 | 11.58359 | 9.606827 | 10.68548 |
| 17241053 | Cdh23         | cadherin 23 (otocadherin)                                                     | 3.367085 | 3.641417 | 3.718678 | 3.652261 | 3.617843 | 3.39128  |
| 17505124 | Cdh3          | cadherin 3                                                                    | 7.144832 | 7.619889 | 7.425664 | 7.098775 | 6.556382 | 6.927189 |
| 17380637 | Cdh4          | cadherin 4                                                                    | 4.865473 | 5.974591 | 6.225846 | 5.923706 | 5.024848 | 5.411655 |
| 17380659 | Cdh4          | cadherin 4                                                                    | 13.24146 | 12.90099 | 11.25169 | 11.66723 | 12.74854 | 15.03559 |
| 17504399 | Cdh5          | cadherin 5                                                                    | 132.1965 | 128.6573 | 169.258  | 127.9494 | 101.1561 | 92.61218 |
| 17316120 | Cdh6          | cadherin 6                                                                    | 24.33161 | 17.82636 | 13.2113  | 19.19941 | 17.71341 | 17.48057 |
| 17216498 | Cdh7          | cadherin 7, type 2                                                            | 4.559135 | 5.611864 | 4.114508 | 4.755609 | 4.175937 | 5.275179 |
| 17512121 | Cdh8          | cadherin 8                                                                    | 4.039061 | 3.533064 | 4.478669 | 4.050472 | 4.050472 | 3.84643  |
| 17310515 | Cdh9          | cadherin 9                                                                    | 3.824046 | 2.879663 | 3.164769 | 3.130797 | 3.301336 | 3.402087 |
| 17320103 | Celsr1        | cadherin, EGF LAG seven-pass G-type receptor 1 (flamingo homolog, Drosophila) | 30.54554 | 26.66749 | 22.29456 | 22.29456 | 21.87332 | 17.4503  |
| 17409284 | Celsr2        | cadherin, EGF LAG seven-pass G-type receptor 2 (flamingo homolog, Drosophila) | 6.074139 | 6.380945 | 7.085109 | 6.215369 | 6.009479 | 4.768614 |
| 17521934 | Celsr3        | cadherin, EGF LAG seven-pass G-type receptor 3 (flamingo homolog, Drosophila) | 3.677894 | 3.774956 | 3.766123 | 4.05986  | 4.486592 | 4.983537 |
| 17306426 | Cdh24         | cadherin-like 24                                                              | 28.52134 | 25.9282  | 26.992   | 28.97908 | 28.32806 | 28.20482 |
| 17380612 | Cdh26         | cadherin-like 26                                                              | 11.80626 | 12.47476 | 10.65612 | 8.133183 | 11.13755 | 9.475355 |
| 17456339 | Cped1         | cadherin-like and PC-esterase domain containing 1                             | 127.7376 | 120.6781 | 112.1363 | 109.8827 | 121.139  | 122.7348 |
| 17305143 | Cdhr1         | cadherin-related family member 1                                              | 5.338965 | 5.338965 | 5.338965 | 5.301461 | 5.338965 | 5.379007 |
| 17287486 | Cdhr2         | cadherin-related family member 2                                              | 2.606909 | 2.798182 | 2.261171 | 2.319751 | 2.713265 | 2.680459 |
| 17280640 | Cdhr3         | cadherin-related family member 3                                              | 4.8479   | 5.338965 | 5.171167 | 5.386134 | 5.616105 | 5.338965 |
| 17521570 | Cdhr4         | cadherin-related family member 4                                              | 5.793921 | 5.43018  | 6.690157 | 6.785946 | 6.077761 | 7.009735 |
| 17497829 | Cdhr5         | cadherin-related family member 5                                              | 112.4126 | 105.8274 | 106.1971 | 119.2181 | 105.8274 | 89.85333 |
| 17411966 | Calb1         | calbindin 1                                                                   | 3.703322 | 3.353366 | 3.703322 | 3.703322 | 4.314669 | 4.547835 |
| 17512872 | Calb2         | calbindin 2                                                                   | 3.673894 | 2.953652 | 3.027653 | 3.094486 | 3.950486 | 2.963208 |
| 17241867 | Cabin1        | calcineurin binding protein 1                                                 | 28.79707 | 30.52967 | 31.82768 | 31.73978 | 26.02759 | 26.65215 |
| 17374814 | Chp1          | calcineurin-like EF hand protein 1                                            | 115.7453 | 109.9421 | 107.6646 | 94.04504 | 83.65791 | 81.67428 |
| 17482752 | Chp2          | calcineurin-like EF hand protein 2                                            | 10.00563 | 13.35798 | 11.80724 | 11.98402 | 13.64102 | 9.696876 |
| 17328225 | Cpped1        | calcineurin-like phosphoesterase domain containing 1                          | 34.49965 | 34.80228 | 31.35579 | 32.70683 | 38.47795 | 30.89454 |
| 17442977 | Crcp          | calcitonin gene-related peptide-receptor component protein                    | 52.77307 | 54.81618 | 65.90427 | 75.41241 | 70.42667 | 72.17013 |
| 17464549 | Calcr         | calcitonin receptor                                                           | 3.339703 | 3.25864  | 3.339703 | 3.339703 | 3.339703 | 4.02149  |
| 17387385 | Calclrl       | calcitonin receptor-like                                                      | 63.99335 | 54.54708 | 57.76285 | 44.12181 | 27.64545 | 36.88826 |
| 17495328 | Calca         | calcitonin/calcitonin-related polypeptide, alpha                              | 4.188286 | 5.300432 | 4.975012 | 4.630025 | 4.206849 | 5.01667  |
| 17482041 | Calcb         | calcitonin-related polypeptide, beta                                          | 6.171709 | 4.348085 | 4.858834 | 4.276795 | 4.430931 | 5.874557 |
| 17272798 | Cant1         | calcium activated nucleotidase 1                                              | 30.49879 | 31.7334  | 29.89744 | 20.24256 | 28.75578 | 28.97989 |
| 17492495 | Cib1          | calcium and integrin binding 1 (calmyrin)                                     | 37.29835 | 39.17035 | 39.30879 | 37.30042 | 39.28972 | 42.89894 |
| 17527261 | Cib2          | calcium and integrin binding family member 2                                  | 30.247   | 30.44451 | 30.40043 | 29.76263 | 26.33373 | 33.16478 |
| 17510484 | Cib3          | calcium and integrin binding family member 3                                  | 18.16312 | 10.65087 | 11.52544 | 12.01671 | 16.68824 | 18.22605 |
| 17446740 | Cib4          | calcium and integrin binding family member 4                                  | 3.977522 | 3.569767 | 4.213853 | 3.176548 | 2.864493 | 3.269024 |
| 17322289 | Calcoco1      | calcium binding and coiled coil domain 1                                      | 70.41252 | 83.98152 | 90.80501 | 83.98152 | 72.03669 | 84.29411 |
| 17268301 | Calcoco2      | calcium binding and coiled-coil domain 2                                      | 3.993545 | 3.92483  | 3.641594 | 3.92483  | 3.628567 | 3.729055 |
| 17451677 | Cabp1         | calcium binding protein 1                                                     | 6.220799 | 5.289642 | 5.304953 | 4.886969 | 4.855601 | 4.886969 |
| 17356084 | Cabp2         | calcium binding protein 2                                                     | 9.023143 | 8.573891 | 7.077403 | 8.073364 | 7.814535 | 6.446652 |
| 17214983 | Cab39         | calcium binding protein 39                                                    | 101.3962 | 102.3608 | 99.27372 | 103.2516 | 99.85204 | 89.96114 |
| 17300984 | Cab39l        | calcium binding protein 39-like                                               | 224.167  | 194.9946 | 195.7556 | 206.6377 | 226.9656 | 206.1913 |
| 17361112 | Cabp4         | calcium binding protein 4                                                     | 7.651751 | 5.844947 | 7.698994 | 6.074855 | 6.210589 | 7.162881 |
| 17473914 | Cabp5         | calcium binding protein 5                                                     | 3.110098 | 3.299666 | 3.362863 | 3.263862 | 3.2428   | 3.754758 |
| 17260029 | Cabp7         | calcium binding protein 7                                                     | 5.688073 | 6.678805 | 6.097974 | 6.556973 | 5.514844 | 6.00723  |
| 17438716 | Cabs1         | calcium binding protein, spermatid specific 1                                 | 4.502512 | 5.012464 | 4.782848 | 4.554713 | 4.759665 | 4.394412 |
| 17368456 | Cacfd1        | calcium channel flower domain containing 1                                    | 10.54093 | 10.14826 | 9.723799 | 10.29028 | 9.310251 | 9.554696 |
| 17532828 | Cacna1f       | calcium channel, voltage-dependent, alpha 1F subunit                          | 6.889838 | 5.794965 | 5.794965 | 5.258787 | 6.030928 | 5.557092 |

|          |          |                                                                                |          |          |          |          |          |          |
|----------|----------|--------------------------------------------------------------------------------|----------|----------|----------|----------|----------|----------|
| 17313106 | Cacna1i  | calcium channel, voltage-dependent, alpha 1I subunit                           | 3.438859 | 3.896881 | 4.091699 | 4.064703 | 3.729055 | 3.654895 |
| 17521327 | Cacna2d2 | calcium channel, voltage-dependent, alpha 2/delta subunit 2                    | 4.000028 | 5.338965 | 5.338965 | 5.338965 | 5.431836 | 6.040341 |
| 17462244 | Cacna2d4 | calcium channel, voltage-dependent, alpha 2/delta subunit 4                    | 9.835988 | 8.895835 | 9.428969 | 8.724425 | 9.069418 | 8.880618 |
| 17434890 | Cacna2d1 | calcium channel, voltage-dependent, alpha2/delta subunit 1                     | 3.904966 | 3.942252 | 3.977826 | 4.272439 | 3.785018 | 2.990154 |
| 17304297 | Cacna2d3 | calcium channel, voltage-dependent, alpha2/delta subunit 3                     | 4.776951 | 4.975391 | 4.776951 | 4.776951 | 4.776951 | 4.841822 |
| 17268691 | Cacnb1   | calcium channel, voltage-dependent, beta 1 subunit                             | 11.76688 | 10.60527 | 10.66876 | 11.29365 | 11.39983 | 11.24366 |
| 17367163 | Cacnb2   | calcium channel, voltage-dependent, beta 2 subunit                             | 4.779203 | 4.350828 | 4.968946 | 4.155465 | 3.62741  | 5.426192 |
| 17314636 | Cacnb3   | calcium channel, voltage-dependent, beta 3 subunit                             | 11.15115 | 11.53871 | 7.639615 | 9.980209 | 8.677804 | 11.44147 |
| 17385281 | Cacnb4   | calcium channel, voltage-dependent, beta 4 subunit                             | 4.742409 | 5.610191 | 4.20927  | 4.20927  | 3.445898 | 4.573219 |
| 17242822 | Cbarp    | calcium channel, voltage-dependent, beta subunit associated regulatory protein | 15.37271 | 13.1993  | 13.1993  | 11.30665 | 14.06629 | 13.1993  |
| 17271143 | Cacng1   | calcium channel, voltage-dependent, gamma subunit 1                            | 7.050913 | 6.461683 | 6.332653 | 6.461683 | 6.467284 | 5.595124 |
| 17318923 | Cacng2   | calcium channel, voltage-dependent, gamma subunit 2                            | 5.068785 | 5.003994 | 5.068785 | 4.661615 | 6.530756 | 5.068785 |
| 17482793 | Cacng3   | calcium channel, voltage-dependent, gamma subunit 3                            | 4.388415 | 4.533766 | 3.974436 | 5.46867  | 3.630857 | 3.729055 |
| 17271151 | Cacng4   | calcium channel, voltage-dependent, gamma subunit 4                            | 17.65812 | 15.49445 | 13.66639 | 11.7562  | 15.42715 | 12.86304 |
| 17271158 | Cacng5   | calcium channel, voltage-dependent, gamma subunit 5                            | 7.979454 | 8.725755 | 8.518622 | 8.903669 | 8.276495 | 8.601987 |
| 17473166 | Cacng6   | calcium channel, voltage-dependent, gamma subunit 6                            | 6.996144 | 6.58818  | 5.881116 | 4.959346 | 6.58818  | 7.304219 |
| 17473155 | Cacng7   | calcium channel, voltage-dependent, gamma subunit 7                            | 28.58151 | 24.93914 | 31.43261 | 21.75206 | 19.47809 | 22.82828 |
| 17473161 | Cacng8   | calcium channel, voltage-dependent, gamma subunit 8                            | 8.297806 | 6.282157 | 7.213503 | 7.852707 | 6.421588 | 6.945603 |
| 17470235 | Cacna1c  | calcium channel, voltage-dependent, L type, alpha 1C subunit                   | 6.03716  | 6.508071 | 6.349179 | 6.08324  | 5.819963 | 6.629638 |
| 17304353 | Cacna1d  | calcium channel, voltage-dependent, L type, alpha 1D subunit                   | 4.600179 | 3.968682 | 4.179905 | 3.565464 | 4.195608 | 4.017617 |
| 17217678 | Cacna1s  | calcium channel, voltage-dependent, L type, alpha 1S subunit                   | 6.896383 | 7.796194 | 7.441327 | 7.983935 | 6.448976 | 7.650107 |
| 17382249 | Cacna1b  | calcium channel, voltage-dependent, N type, alpha 1B subunit                   | 7.65934  | 7.65934  | 7.65934  | 8.355754 | 8.477565 | 8.202593 |
| 17503122 | Cacna1a  | calcium channel, voltage-dependent, P/Q type, alpha 1A subunit                 | 5.780483 | 5.989062 | 5.994212 | 6.030928 | 6.030928 | 6.030928 |
| 17228293 | Cacna1e  | calcium channel, voltage-dependent, R type, alpha 1E subunit                   | 2.79326  | 3.347375 | 2.665914 | 2.79326  | 2.856067 | 2.953407 |
| 17267885 | Cacna1g  | calcium channel, voltage-dependent, T type, alpha 1G subunit                   | 2.754556 | 3.343317 | 4.142897 | 3.267393 | 3.37033  | 3.882834 |
| 17342249 | Cacna1h  | calcium channel, voltage-dependent, T type, alpha 1H subunit                   | 6.992896 | 10.34241 | 7.861638 | 8.341692 | 8.687433 | 8.74204  |
| 17510542 | Cherp    | calcium homeostasis endoplasmic reticulum protein                              | 54.96038 | 60.43071 | 76.21959 | 62.33152 | 61.61373 | 58.80716 |
| 17365471 | Calhm1   | calcium homeostasis modulator 1                                                | 7.981832 | 6.365086 | 7.502025 | 7.593053 | 6.160596 | 6.916825 |
| 17365461 | Calhm2   | calcium homeostasis modulator 2                                                | 5.039114 | 6.085138 | 9.219957 | 5.875656 | 5.093333 | 4.357649 |
| 17287726 | Cam1     | calcium modulating ligand                                                      | 32.76106 | 28.251   | 28.04983 | 30.22771 | 33.29445 | 33.38805 |
| 17327995 | Carhsp1  | calcium regulated heat stable protein 1                                        | 87.59035 | 94.25714 | 90.78424 | 83.18549 | 84.29061 | 95.01873 |
| 17463377 | Cracr2a  | calcium release activated channel regulator 2A                                 | 9.63577  | 11.53367 | 12.21718 | 12.48566 | 12.66961 | 10.58904 |
| 17484925 | Cracr2b  | calcium release activated channel regulator 2B                                 | 7.307764 | 7.702677 | 6.703851 | 7.257537 | 6.896622 | 7.07044  |
| 17213349 | Carf     | calcium response factor                                                        | 10.12591 | 10.56873 | 10.4982  | 7.820495 | 12.69721 | 11.99998 |
| 17469705 | Camk1    | calcium/calmodulin-dependent protein kinase I                                  | 31.52949 | 36.02783 | 36.88392 | 34.05937 | 27.69435 | 36.80909 |
| 17231252 | Camk1g   | calcium/calmodulin-dependent protein kinase I gamma                            | 5.829208 | 5.979356 | 6.540496 | 6.724887 | 5.832078 | 5.345334 |
| 17381357 | Camk1d   | calcium/calmodulin-dependent protein kinase ID                                 | 55.01374 | 45.81982 | 51.27594 | 46.01142 | 55.51286 | 47.46493 |
| 17351001 | Camk2a   | calcium/calmodulin-dependent protein kinase II alpha                           | 6.045367 | 9.47818  | 5.764079 | 9.468986 | 4.874351 | 8.326961 |
| 17303916 | Camk2g   | calcium/calmodulin-dependent protein kinase II gamma                           | 22.37631 | 24.36114 | 20.95525 | 23.29454 | 24.84132 | 26.41948 |
| 17420514 | Camk2n1  | calcium/calmodulin-dependent protein kinase II inhibitor 1                     | 80.9826  | 89.00226 | 95.55702 | 88.33235 | 110.5979 | 100.9208 |
| 17329163 | Camk2n2  | calcium/calmodulin-dependent protein kinase II inhibitor 2                     | 13.70566 | 12.85021 | 12.04431 | 11.18366 | 13.19043 | 14.44271 |
| 17260261 | Camk2b   | calcium/calmodulin-dependent protein kinase II, beta                           | 6.992896 | 6.405983 | 6.992896 | 8.368796 | 7.998891 | 7.024132 |
| 17402438 | Camk2d   | calcium/calmodulin-dependent protein kinase II, delta                          | 15.30944 | 15.088   | 12.5923  | 17.63073 | 17.07188 | 18.47804 |
| 17349341 | Camk4    | calcium/calmodulin-dependent protein kinase IV                                 | 4.672161 | 4.088382 | 3.992825 | 3.992825 | 3.853502 | 3.653223 |
| 17252539 | Camkk1   | calcium/calmodulin-dependent protein kinase kinase 1, alpha                    | 6.064884 | 6.519675 | 5.695372 | 6.441336 | 6.300953 | 5.832442 |
| 17452456 | Camkk2   | calcium/calmodulin-dependent protein kinase kinase 2, beta                     | 15.82342 | 19.65657 | 18.39842 | 17.81919 | 18.93824 | 18.7208  |
| 17540332 | Cask     | calcium/calmodulin-dependent serine protein kinase (MAGUK family)              | 38.46862 | 38.6193  | 38.81278 | 32.36315 | 38.81278 | 30.996   |
| 17348591 | Cabyr    | calcium-binding tyrosine-(Y)-phosphorylation regulated (fibrous)heathin 2)     | 5.078914 | 5.964371 | 4.274661 | 5.074269 | 4.283262 | 4.67647  |
| 17330188 | Casr     | calcium-sensing receptor                                                       | 5.266593 | 5.266593 | 5.359803 | 5.818834 | 5.266593 | 4.886969 |
| 17228743 | Cacybp   | calcylin binding protein                                                       | 131.2415 | 90.36862 | 78.14437 | 89.93682 | 77.07174 | 80.97698 |
| 17497584 | Caly     | calcyon neuron-specific vesicular protein                                      | 11.50086 | 11.50086 | 12.82387 | 9.488237 | 8.299302 | 13.15701 |
| 17310250 | Caps1    | calcyphosine-like                                                              | 3.195895 | 3.263862 | 2.997397 | 4.365691 | 3.248582 | 4.508539 |
| 17237313 | Caps2    | calcyphosphine 2                                                               | 3.422095 | 3.645129 | 3.506787 | 3.648011 | 3.072387 | 3.335031 |
| 17457184 | Cald1    | caldesmon 1                                                                    | 185.0832 | 161.8373 | 171.8445 | 155.5247 | 154.3348 | 148.7535 |
| 17413507 | Ccin     | calicin                                                                        | 3.353436 | 3.617568 | 2.953734 | 2.831232 | 3.933654 | 2.957934 |
| 17502921 | Clgn     | calmegin                                                                       | 6.606792 | 7.228368 | 7.935109 | 9.730069 | 7.935109 | 8.352048 |
| 17283725 | Clmn     | calmin                                                                         | 141.5924 | 162.2742 | 183.5081 | 159.1518 | 156.1415 | 174.8616 |
| 17277924 | Calm1    | calmodulin 1                                                                   | 99.49416 | 95.56497 | 98.03534 | 87.86886 | 81.69637 | 93.13167 |
| 17347938 | Calm2    | calmodulin 2                                                                   | 268.424  | 314.1196 | 384.0313 | 321.334  | 371.3202 | 354.8757 |
| 17486967 | Calm3    | calmodulin 3                                                                   | 127.9645 | 138.7285 | 146.8551 | 123.8251 | 109.3319 | 119.676  |
| 17284906 | Calm4    | calmodulin 4                                                                   | 9.088675 | 9.65188  | 7.567412 | 8.086862 | 10.29855 | 8.74695  |
| 17284910 | Calm5    | calmodulin 5                                                                   | 6.506402 | 4.778143 | 6.127973 | 9.026145 | 5.447522 | 7.98864  |
| 17433359 | Camta1   | calmodulin binding transcription activator 1                                   | 4.313234 | 4.356924 | 5.2036   | 4.861225 | 5.372226 | 4.910194 |
| 17265340 | Camta2   | calmodulin binding transcription activator 2                                   | 35.53626 | 50.1473  | 53.19873 | 41.59332 | 39.62173 | 44.93071 |
| 17382778 | Camsap1  | calmodulin regulated spectrin-associated protein 1                             | 27.61557 | 34.80759 | 27.49638 | 25.27484 | 25.45046 | 27.29661 |
| 17227483 | Camsap2  | calmodulin regulated spectrin-associated protein family, member 2              | 56.55058 | 47.74507 | 44.79171 | 47.88228 | 42.73452 | 41.26652 |
| 17498673 | Camsap3  | calmodulin regulated spectrin-associated protein family, member 3              | 21.67214 | 22.2805  | 20.03249 | 24.42319 | 18.97516 | 18.6018  |
| 17290238 | Calml3   | calmodulin-like 3                                                              | 6.171709 | 7.069509 | 6.438167 | 6.717573 | 6.171709 | 7.036802 |
| 17518238 | Calml4   | calmodulin-like 4                                                              | 13.354   | 23.30391 | 17.18955 | 15.6717  | 12.08839 | 13.91906 |
| 17340148 | Camkmt   | calmodulin-lysine N-methyltransferase                                          | 9.516361 | 7.562745 | 10.40222 | 8.51685  | 7.291977 | 6.393607 |
| 17443047 | Caln1    | calneuron 1                                                                    | 6.261421 | 5.572096 | 7.799005 | 7.194328 | 6.614949 | 8.332215 |
| 17262336 | Canx     | calnexin                                                                       | 864.271  | 716.3645 | 724.9964 | 670.8889 | 726.0223 | 665.1519 |
| 17361890 | Capn1    | calpain 1                                                                      | 38.86232 | 40.48288 | 46.09218 | 42.8404  | 44.56163 | 38.02088 |
| 17215853 | Capn10   | calpain 10                                                                     | 23.05056 | 17.14695 | 22.89943 | 20.72859 | 17.96018 | 19.24391 |
| 17345238 | Capn11   | calpain 11                                                                     | 4.081983 | 3.751038 | 4.20927  | 7.532193 | 5.066994 | 3.20368  |
| 17476011 | Capn12   | calpain 12                                                                     | 10.49653 | 11.68001 | 10.65412 | 10.61638 | 10.97866 | 12.65943 |
| 17347114 | Capn13   | calpain 13                                                                     | 4.453193 | 4.028548 | 3.798632 | 3.598087 | 3.825054 | 3.860881 |
| 17342544 | Capn15   | calpain 15                                                                     | 17.57131 | 13.64594 | 16.83206 | 15.56895 | 18.46601 | 15.18884 |
| 17230611 | Capn2    | calpain 2                                                                      | 101.9968 | 99.65774 | 95.93331 | 100.7615 | 101.6453 | 101.0538 |
| 17375045 | Capn3    | calpain 3                                                                      | 3.840116 | 3.370284 | 4.20927  | 4.155465 | 4.383824 | 5.285207 |
| 17493526 | Capn5    | calpain 5                                                                      | 13.51941 | 14.7229  | 19.14837 | 13.70158 | 12.49449 | 14.90526 |
| 17545106 | Capn6    | calpain 6                                                                      | 4.345433 | 6.812716 | 4.647678 | 6.812716 | 4.912475 | 6.396178 |
| 17298426 | Capn7    | calpain 7                                                                      | 85.15681 | 80.23779 | 68.16126 | 84.99759 | 83.50033 | 85.35004 |
| 17220394 | Capn8    | calpain 8                                                                      | 3.706661 | 6.208092 | 4.243457 | 5.245717 | 5.458218 | 5.458218 |

|          |               |                                                                                |          |          |          |          |          |          |
|----------|---------------|--------------------------------------------------------------------------------|----------|----------|----------|----------|----------|----------|
| 17506775 | Capn9         | calpain 9                                                                      | 6.227918 | 7.072205 | 6.632119 | 6.987082 | 5.601526 | 6.460698 |
| 17488957 | Capns1        | calpain, small subunit 1                                                       | 495.8431 | 480.8156 | 557.8719 | 429.4064 | 379.409  | 398.8521 |
| 17503862 | Capns2        | calpain, small subunit 2                                                       | 4.512854 | 11.15068 | 6.645326 | 5.345593 | 4.850387 | 6.232366 |
| 17294421 | Cast          | calpastatin                                                                    | 137.0948 | 129.7607 | 136.6489 | 123.1762 | 135.817  | 133.5161 |
| 17515402 | Cnn1          | calponin 1                                                                     | 5.759366 | 4.763163 | 6.534378 | 5.386134 | 5.386134 | 5.386134 |
| 17235077 | Cnn2          | calponin 2                                                                     | 26.7508  | 26.09099 | 30.05202 | 23.91162 | 23.78615 | 20.7069  |
| 17402155 | Cnn3          | calponin 3, acidic                                                             | 373.5403 | 350.5897 | 315.8925 | 341.4735 | 322.4899 | 320.0492 |
| 17511183 | Calr          | calreticulin                                                                   | 1800.161 | 1274.08  | 1160.749 | 1291.615 | 1434.398 | 1161.988 |
| 17510526 | Calr3         | calreticulin 3                                                                 | 12.97669 | 11.50086 | 10.95115 | 10.94417 | 10.97174 | 11.85702 |
| 17416814 | Calr4         | calreticulin 4                                                                 | 2.656101 | 2.583828 | 2.52876  | 2.729695 | 3.314888 | 3.103422 |
| 17229851 | Casq1         | calsequestrin 1                                                                | 2.494136 | 3.207368 | 3.838759 | 3.482902 | 4.061267 | 4.57804  |
| 17401041 | Casq2         | calsequestrin 2                                                                | 8.088432 | 6.623115 | 5.746765 | 5.532801 | 5.682044 | 6.091764 |
| 17421828 | Clstn1        | calsyntenin 1                                                                  | 14.89845 | 12.59658 | 17.87498 | 14.89845 | 15.21413 | 12.02038 |
| 17529930 | Clstn2        | calsyntenin 2                                                                  | 3.200462 | 3.599658 | 3.475595 | 3.171884 | 3.263862 | 3.486864 |
| 17470711 | Clstn3        | calsyntenin 3                                                                  | 7.870689 | 9.646998 | 9.310251 | 9.359166 | 6.533065 | 9.800056 |
| 17456584 | Calu          | calumenin                                                                      | 87.50418 | 76.49269 | 81.85962 | 78.22783 | 78.61649 | 82.05162 |
| 17521510 | Camkv         | CaM kinase-like vesicle-associated                                             | 7.42093  | 9.999251 | 10.36042 | 8.559283 | 8.122422 | 11.33349 |
| 17468461 | Cml1          | camello-like 1                                                                 | 58.63702 | 52.18524 | 49.28887 | 59.02565 | 55.09807 | 56.80988 |
| 17468444 | Cml2          | camello-like 2                                                                 | 629.416  | 575.0565 | 629.1281 | 605.0833 | 617.1255 | 504.4684 |
| 17468417 | Cml3          | camello-like 3                                                                 | 10.2209  | 11.38845 | 13.15063 | 15.23228 | 12.67022 | 12.84674 |
| 17468432 | Cml5          | camello-like 5                                                                 | 5.769355 | 3.440814 | 3.392362 | 5.950331 | 4.579182 | 4.228541 |
| 17213676 | Creb1         | cAMP responsive element binding protein 1                                      | 40.52668 | 33.49445 | 41.68568 | 36.963   | 36.30685 | 38.31374 |
| 17413369 | Creb3         | cAMP responsive element binding protein 3                                      | 62.54922 | 51.96218 | 49.78606 | 62.463   | 52.94234 | 58.06392 |
| 17388332 | Creb3l1       | cAMP responsive element binding protein 3-like 1                               | 7.185955 | 7.170382 | 9.971565 | 10.43877 | 11.92246 | 8.913796 |
| 17465906 | Creb3l2       | cAMP responsive element binding protein 3-like 2                               | 71.59466 | 37.2072  | 58.0764  | 48.51974 | 47.87067 | 40.60907 |
| 17243183 | Creb3l3       | cAMP responsive element binding protein 3-like 3                               | 482.3277 | 446.4578 | 420.3654 | 438.1436 | 342.9133 | 399.4442 |
| 17407246 | Creb3l4       | cAMP responsive element binding protein 3-like 4                               | 4.032431 | 4.144822 | 4.681043 | 4.188315 | 4.681043 | 3.369233 |
| 17458677 | Creb5         | cAMP responsive element binding protein 5                                      | 4.238019 | 4.525697 | 5.38117  | 5.603662 | 5.219349 | 4.87354  |
| 17458682 | Creb5         | cAMP responsive element binding protein 5                                      | 6.561656 | 8.652518 | 7.81746  | 7.298854 | 7.590316 | 7.048469 |
| 17463709 | Crebl2        | cAMP responsive element binding protein-like 2                                 | 87.60492 | 79.20557 | 88.90052 | 81.33024 | 86.11365 | 96.06174 |
| 17352371 | Crem          | cAMP responsive element modulator                                              | 19.47431 | 15.83615 | 15.76398 | 15.28707 | 15.28707 | 14.65143 |
| 17519384 | Arpp19        | cAMP-regulated phosphoprotein 19                                               | 16.99184 | 21.30913 | 20.13062 | 20.85368 | 17.23238 | 18.12036 |
| 17291915 | Cage1         | cancer antigen 1                                                               | 3.158632 | 2.704459 | 2.974712 | 4.059888 | 3.425038 | 3.158632 |
| 17472705 | Casc1         | cancer susceptibility candidate 1                                              | 4.136126 | 4.002912 | 3.73459  | 4.136126 | 4.573473 | 3.125203 |
| 17256177 | Casc3         | cancer susceptibility candidate 3                                              | 28.377   | 25.43001 | 28.86761 | 25.70042 | 26.43395 | 24.13191 |
| 17375327 | Casc4         | cancer susceptibility candidate 4                                              | 38.24661 | 28.23808 | 31.22371 | 19.86215 | 18.84082 | 19.27274 |
| 17374692 | Casc5         | cancer susceptibility candidate 5                                              | 3.474439 | 3.292013 | 3.837748 | 4.043936 | 3.606726 | 3.837748 |
| 17535175 | Ctag2         | cancer/testis antigen 2                                                        | 3.250631 | 3.428149 | 3.817584 | 3.532379 | 3.043244 | 4.219816 |
| 17265917 | Ovca2         | candidate tumor suppressor in ovarian cancer 2                                 | 29.27404 | 31.62777 | 31.62777 | 32.36606 | 30.76035 | 31.62777 |
| 17412627 | Cnr1          | cannabinoid receptor 1 (brain)                                                 | 5.000908 | 4.373717 | 4.598617 | 3.706712 | 3.965575 | 4.195754 |
| 17419959 | Cnr2          | cannabinoid receptor 2 (macrophage)                                            | 17.48747 | 17.48747 | 19.49537 | 16.11207 | 10.41175 | 15.91858 |
| 17247438 | Cnrip1        | cannabinoid receptor interacting protein 1                                     | 13.16951 | 17.2239  | 11.53943 | 12.30412 | 10.38536 | 12.98892 |
| 17446567 | Cnpy1         | canopy 1 homolog (zebrafish)                                                   | 6.136517 | 7.241357 | 6.99338  | 6.270846 | 6.270846 | 7.737889 |
| 17238424 | Cnpy2         | canopy 2 homolog (zebrafish)                                                   | 199.1608 | 223.1608 | 196.7282 | 201.1977 | 241.7312 | 215.5308 |
| 17345570 | Cnpy3         | canopy 3 homolog (zebrafish)                                                   | 54.05814 | 41.31375 | 47.84745 | 48.58234 | 41.64814 | 38.05094 |
| 17443785 | Cnpy4         | canopy 4 homolog (zebrafish)                                                   | 12.82361 | 12.75747 | 14.7025  | 11.98377 | 10.7716  | 12.82361 |
| 17335579 | Cmtr1         | cap methyltransferase 1                                                        | 88.71647 | 77.7074  | 83.42801 | 84.18726 | 70.09356 | 78.8058  |
| 17505501 | Cmtr2         | cap methyltransferase 2                                                        | 9.348403 | 10.33338 | 10.16607 | 12.95628 | 8.322402 | 10.16607 |
| 17429613 | Cap1          | CAP, adenylate cyclase-associated protein 1 (yeast)                            | 176.9086 | 193.1771 | 186.062  | 157.8839 | 153.1116 | 148.0622 |
| 17287005 | Cap2          | CAP, adenylate cyclase-associated protein, 2 (yeast)                           | 5.338965 | 6.251056 | 5.269441 | 5.513238 | 6.129333 | 4.990796 |
| 17452640 | Clip1         | CAP-GLY domain containing linker protein 1                                     | 53.04335 | 64.26049 | 75.3706  | 63.87945 | 59.61651 | 72.52116 |
| 17453383 | Clip2         | CAP-GLY domain containing linker protein 2                                     | 15.17684 | 19.49186 | 17.78489 | 15.59682 | 9.283057 | 13.596   |
| 17476317 | Clip3         | CAP-GLY domain containing linker protein 3                                     | 6.157138 | 6.566843 | 5.437713 | 5.191099 | 6.157138 | 4.977219 |
| 17339529 | Clip4         | CAP-GLY domain containing linker protein family, member 4                      | 11.46878 | 9.487908 | 11.03336 | 10.55833 | 13.99918 | 9.844309 |
| 17475193 | Cic           | capicua homolog (Drosophila)                                                   | 23.85732 | 25.22776 | 31.07839 | 24.81912 | 26.37374 | 19.15979 |
| 17408793 | Capza1        | capping protein (actin filament) muscle Z-line, alpha 1                        | 82.67676 | 73.4291  | 79.72443 | 72.3359  | 65.77193 | 65.56573 |
| 17546205 | 4933400A11Rik | capping protein (actin filament) muscle Z-line, alpha 1 pseudogene             | 2.323307 | 2.523979 | 2.260842 | 2.789642 | 3.004157 | 2.447621 |
| 17456204 | Capza2        | capping protein (actin filament) muscle Z-line, alpha 2                        | 78.22783 | 76.4275  | 86.33718 | 84.22753 | 84.22753 | 99.67225 |
| 17463967 | Capza3        | capping protein (actin filament) muscle Z-line, alpha 3                        | 3.253494 | 3.375755 | 2.937523 | 3.400814 | 2.645646 | 3.622511 |
| 17420582 | Capzb         | capping protein (actin filament) muscle Z-line, beta                           | 241.4934 | 256.087  | 274.1782 | 208.0563 | 199.1581 | 193.9889 |
| 17459656 | Capg          | capping protein (actin filament), gelsolin-like                                | 11.77202 | 10.41665 | 9.748025 | 9.194557 | 12.25077 | 10.41665 |
| 17537188 | 5730416F02Rik | capping protein (actin filament), gelsolin-like pseudogene                     | 4.886969 | 3.617793 | 4.42467  | 4.886969 | 6.551294 | 5.639941 |
| 17473018 | Caprin2       | caprin family member 2                                                         | 10.12318 | 9.685993 | 14.72382 | 12.21558 | 9.059868 | 11.21688 |
| 17213894 | Cps1          | carbamoyl-phosphate synthetase 1                                               | 2507.441 | 2493.178 | 2758.771 | 2954.36  | 2654.271 | 3108.472 |
| 17435978 | Cad           | carbamoyl-phosphate synthetase 2, aspartate transcarbamylase, and dihydroorota | 24.82772 | 13.10804 | 16.23786 | 12.71051 | 15.96466 | 15.96466 |
| 17468895 | Chst13        | carbohydrate (chondroitin 4) sulfotransferase 13                               | 30.40486 | 29.73871 | 25.7416  | 40.51572 | 28.59062 | 29.32949 |
| 17241045 | Chst3         | carbohydrate (chondroitin 6/keratan) sulfotransferase 3                        | 3.883991 | 3.883991 | 3.718704 | 3.679195 | 4.519678 | 4.081021 |
| 17512868 | Chst4         | carbohydrate (chondroitin 6/keratan) sulfotransferase 4                        | 3.946654 | 3.839903 | 4.532164 | 4.20927  | 3.267778 | 4.350647 |
| 17373521 | Chst1         | carbohydrate (keratan sulfate Gal-6) sulfotransferase 1                        | 8.936377 | 8.254209 | 10.66876 | 9.488237 | 6.209512 | 9.662389 |
| 17374678 | Chst14        | carbohydrate (N-acetylgalactosamine 4-O) sulfotransferase 14                   | 16.26828 | 22.31605 | 20.59611 | 15.06731 | 16.29096 | 19.26006 |
| 17489699 | Chst8         | carbohydrate (N-acetylgalactosamine 4-O) sulfotransferase 8                    | 13.39275 | 14.06912 | 14.08209 | 10.57826 | 14.53068 | 13.60542 |
| 17352872 | Chst9         | carbohydrate (N-acetylgalactosamine 4-O) sulfotransferase 9                    | 2.450218 | 2.64264  | 2.515648 | 2.752953 | 2.546049 | 2.885617 |
| 17497076 | Chst15        | carbohydrate (N-acetylgalactosamine 4-sulfate 6-O) sulfotransferase 15         | 19.18571 | 24.38682 | 31.30324 | 28.44159 | 20.19435 | 20.92245 |
| 17513181 | Chst5         | carbohydrate (N-acetylglucosamine 6-O) sulfotransferase 5                      | 13.82905 | 12.86813 | 10.89958 | 12.86813 | 12.04966 | 15.43764 |
| 17533535 | Chst7         | carbohydrate (N-acetylglucosamine) sulfotransferase 7                          | 4.681043 | 5.728073 | 3.64422  | 5.273716 | 3.536862 | 3.372644 |
| 17499014 | Carkd         | carbohydrate kinase domain containing                                          | 56.85321 | 60.35243 | 56.73669 | 56.51688 | 57.39846 | 55.86334 |
| 17222511 | Chst10        | carbohydrate sulfotransferase 10                                               | 9.181692 | 8.314042 | 9.181692 | 8.969764 | 10.48228 | 11.07097 |
| 17235941 | Chst11        | carbohydrate sulfotransferase 11                                               | 7.647298 | 10.52516 | 12.37477 | 9.097562 | 6.529805 | 9.142635 |
| 17444100 | Chst12        | carbohydrate sulfotransferase 12                                               | 7.648782 | 6.778096 | 6.980547 | 6.971118 | 7.061575 | 7.822989 |
| 17529708 | Chst2         | carbohydrate sulfotransferase 2                                                | 18.26412 | 22.85202 | 21.73397 | 17.84131 | 17.33601 | 18.2109  |
| 17404180 | Car1          | carbonic anhydrase 1                                                           | 22.03248 | 23.46649 | 16.83206 | 29.89392 | 21.97452 | 29.98523 |
| 17255097 | Car10         | carbonic anhydrase 10                                                          | 5.488607 | 5.708295 | 5.532456 | 6.744914 | 4.927275 | 5.96247  |
| 17477968 | Car11         | carbonic anhydrase 11                                                          | 8.1985   | 11.39398 | 11.91758 | 12.64452 | 13.33578 | 11.24366 |
| 17396143 | Car13         | carbonic anhydrase 13                                                          | 10.77018 | 10.21835 | 11.81829 | 12.18657 | 7.341068 | 10.22097 |

|          |            |                                                                          |          |          |          |          |          |          |
|----------|------------|--------------------------------------------------------------------------|----------|----------|----------|----------|----------|----------|
| 17407956 | Car14      | carbonic anhydrase 14                                                    | 112.4274 | 110.4431 | 101.7179 | 128.415  | 105.2751 | 104.039  |
| 17328780 | Car15      | carbonic anhydrase 15                                                    | 9.692508 | 7.306143 | 8.116063 | 8.2644   | 7.275619 | 7.1482   |
| 17396162 | Car2       | carbonic anhydrase 2                                                     | 42.89448 | 49.44868 | 48.63861 | 54.01132 | 29.05269 | 45.97125 |
| 17396152 | Car3       | carbonic anhydrase 3                                                     | 2171.521 | 1573.324 | 1223.925 | 1766.796 | 1828.43  | 2554.774 |
| 17254508 | Car4       | carbonic anhydrase 4                                                     | 4.933153 | 5.448768 | 4.888765 | 5.523145 | 6.089568 | 6.642379 |
| 17513655 | Car5a      | carbonic anhydrase 5a, mitochondrial                                     | 158.0547 | 161.5447 | 173.4445 | 188.6032 | 140.3582 | 174.7998 |
| 17545936 | Car5b      | carbonic anhydrase 5b, mitochondrial                                     | 13.74876 | 11.77349 | 12.1201  | 10.08962 | 12.33187 | 8.097295 |
| 17433265 | Car6       | carbonic anhydrase 6                                                     | 3.497733 | 3.122821 | 3.318681 | 3.55207  | 2.824724 | 3.28882  |
| 17504454 | Car7       | carbonic anhydrase 7                                                     | 17.04386 | 16.34016 | 15.74793 | 18.63148 | 14.31296 | 16.70792 |
| 17423121 | Car8       | carbonic anhydrase 8                                                     | 201.8906 | 152.8285 | 128.7037 | 160.1034 | 189.6374 | 194.4776 |
| 17413352 | Car9       | carbonic anhydrase 9                                                     | 4.50248  | 4.191248 | 5.049218 | 4.109292 | 4.516546 | 4.316554 |
| 17518780 | Car12      | carbonic anhydrase 12                                                    | 6.767627 | 5.995583 | 5.425552 | 5.613848 | 4.318349 | 6.45743  |
| 17327255 | Cbr1       | carbonyl reductase 1                                                     | 73.84406 | 124.2378 | 144.3603 | 86.48632 | 76.9415  | 71.98877 |
| 17547965 | Cbr1       | carbonyl reductase 1                                                     | 242.0699 | 393.9531 | 482.9232 | 287.2175 | 236.9666 | 224.2664 |
| 17273304 | Cbr2       | carbonyl reductase 2                                                     | 11.10933 | 10.49005 | 10.91674 | 10.64313 | 12.74271 | 13.71669 |
| 17327264 | Cbr3       | carbonyl reductase 3                                                     | 8.542984 | 19.29787 | 18.73819 | 12.67251 | 10.90078 | 9.22392  |
| 17501427 | Cbr4       | carbonyl reductase 4                                                     | 45.04172 | 42.53062 | 36.67385 | 44.21549 | 49.83233 | 45.73764 |
| 17504495 | Ces2b      | carboxylesterase 2B                                                      | 5.201256 | 3.589543 | 2.610344 | 4.408109 | 3.558428 | 3.450391 |
| 17383381 | Cel        | carboxyl ester lipase                                                    | 5.12581  | 5.961395 | 5.63912  | 5.416234 | 5.893808 | 7.681883 |
| 17511643 | Ces1a      | carboxylesterase 1A                                                      | 3.984421 | 5.879323 | 5.085572 | 5.203419 | 4.529432 | 6.013229 |
| 17511660 | Ces1b      | carboxylesterase 1B                                                      | 41.83765 | 39.49861 | 36.92997 | 44.39176 | 42.68153 | 40.09193 |
| 17511677 | Ces1c      | carboxylesterase 1C                                                      | 1812.682 | 1843.677 | 1663.908 | 1638.375 | 2204.155 | 1857.427 |
| 17511693 | Ces1d      | carboxylesterase 1D                                                      | 67.97159 | 95.38497 | 118.0071 | 76.99111 | 110.9565 | 116.0474 |
| 17511714 | Ces1e      | carboxylesterase 1E                                                      | 140.7548 | 109.9352 | 97.96334 | 90.55485 | 125.0005 | 142.8513 |
| 17511731 | Ces1f      | carboxylesterase 1F                                                      | 498.0787 | 627.2427 | 578.4306 | 440.0489 | 363.4694 | 492.5034 |
| 17511748 | Ces1g      | carboxylesterase 1G                                                      | 234.7465 | 285.5362 | 292.753  | 335.3305 | 417.618  | 513.233  |
| 17511765 | Ces1h      | carboxylesterase 1H                                                      | 2.505624 | 2.521059 | 2.67402  | 3.475619 | 2.560472 | 2.953407 |
| 17504477 | Ces2a      | carboxylesterase 2A                                                      | 218.4229 | 132.0911 | 89.56232 | 148.7597 | 159.8971 | 153.4984 |
| 17504512 | Ces2c      | carboxylesterase 2C                                                      | 20.19463 | 19.43614 | 21.42941 | 38.10346 | 18.49496 | 25.07695 |
| 17504527 | Ces2d-ps   | carboxylesterase 2D, pseudogene                                          | 16.35081 | 12.38679 | 18.18617 | 18.49649 | 17.79007 | 20.51433 |
| 17504541 | Ces2e      | carboxylesterase 2E                                                      | 182.606  | 171.7183 | 127.5775 | 177.8923 | 167.649  | 178.1576 |
| 17504558 | Ces2f      | carboxylesterase 2F                                                      | 2.815498 | 3.092985 | 3.266665 | 3.584073 | 2.877767 | 3.870366 |
| 17504572 | Ces2g      | carboxylesterase 2G                                                      | 88.53463 | 74.15489 | 67.72516 | 89.17392 | 114.6601 | 127.7607 |
| 17504587 | Ces2h      | carboxylesterase 2H                                                      | 3.478728 | 4.163538 | 6.348651 | 4.576009 | 4.52206  | 3.896638 |
| 17504601 | Ces3a      | carboxylesterase 3A                                                      | 1342.159 | 729.2603 | 422.5974 | 1154.386 | 1079.046 | 894.7371 |
| 17504616 | Ces3b      | carboxylesterase 3B                                                      | 216.8119 | 100.2571 | 87.34541 | 303.1966 | 233.0749 | 155.1264 |
| 17504632 | Ces4a      | carboxylesterase 4A                                                      | 9.455475 | 8.817624 | 6.726425 | 8.137073 | 8.306611 | 7.810149 |
| 17511788 | Ces5a      | carboxylesterase 5A                                                      | 3.327641 | 3.605027 | 3.514209 | 3.40178  | 4.161288 | 2.82085  |
| 17310816 | Cmb1       | carboxymethylenebutenolidase-like (Pseudomonas)                          | 234.7937 | 250.6326 | 235.8425 | 279.2474 | 243.5375 | 272.4523 |
| 17456918 | Cpa1       | carboxypeptidase A1, pancreatic                                          | 6.149461 | 5.245681 | 4.90999  | 5.230033 | 6.335111 | 5.245681 |
| 17456868 | Cpa2       | carboxypeptidase A2, pancreatic                                          | 3.844591 | 3.54506  | 3.130059 | 3.363399 | 3.877536 | 3.54506  |
| 17404337 | Cpa3       | carboxypeptidase A3, mast cell                                           | 3.462322 | 3.244351 | 3.009972 | 3.025346 | 3.346307 | 3.245273 |
| 17456886 | Cpa4       | carboxypeptidase A4                                                      | 7.154644 | 6.243132 | 6.915866 | 5.644047 | 6.35411  | 6.753334 |
| 17456900 | Cpa5       | carboxypeptidase A5                                                      | 3.343664 | 3.397327 | 3.057431 | 3.207368 | 3.560229 | 3.336487 |
| 17221269 | Cpa6       | carboxypeptidase A6                                                      | 2.886738 | 2.991523 | 3.044468 | 3.436429 | 2.991523 | 2.781417 |
| 17404350 | Cpb1       | carboxypeptidase B1 (tissue)                                             | 2.454706 | 2.49815  | 2.763794 | 2.881041 | 2.814503 | 2.862013 |
| 17301995 | Cpb2       | carboxypeptidase B2 (plasma)                                             | 861.7885 | 901.2478 | 1030.915 | 816.8288 | 1014.42  | 852.0829 |
| 17266157 | Cpd        | carboxypeptidase D                                                       | 66.10145 | 66.33324 | 61.31083 | 62.65814 | 88.0945  | 69.13862 |
| 17509617 | Cpe        | carboxypeptidase E                                                       | 5.745769 | 5.130218 | 6.030886 | 5.886785 | 5.945673 | 5.965074 |
| 17237547 | Cpm        | carboxypeptidase M                                                       | 8.255983 | 8.511834 | 7.861311 | 5.016635 | 6.992896 | 7.613501 |
| 17364988 | Cpn1       | carboxypeptidase N, polypeptide 1                                        | 656.3903 | 668.211  | 760.271  | 534.8016 | 626.895  | 503.9651 |
| 17329627 | Cpn2       | carboxypeptidase N, polypeptide 2                                        | 214.7479 | 216.534  | 247.1323 | 215.3784 | 298.8049 | 215.7864 |
| 17310882 | Cpq        | carboxypeptidase Q                                                       | 173.6237 | 182.763  | 157.6947 | 147.3926 | 147.9412 | 153.4591 |
| 17391623 | Cpxm1      | carboxypeptidase X 1 (M14 family)                                        | 7.151074 | 6.817062 | 6.403497 | 7.676667 | 6.776545 | 8.644185 |
| 17497058 | Cpxm2      | carboxypeptidase X 2 (M14 family)                                        | 5.979356 | 5.979356 | 5.787659 | 5.836081 | 5.544087 | 5.979356 |
| 17447331 | Cpz        | carboxypeptidase Z                                                       | 4.371081 | 6.381166 | 5.816213 | 5.927443 | 4.093146 | 5.963172 |
| 17466938 | Cpvl       | carboxypeptidase, vitellogenic-like                                      | 4.99218  | 4.655513 | 4.238107 | 5.548278 | 4.308752 | 5.726366 |
| 17487952 | Ceacam1    | carcinoembryonic antigen-related cell adhesion molecule 1                | 792.1117 | 719.1505 | 714.9408 | 644.1889 | 660.4566 | 712.3685 |
| 17475081 | Ceacam10   | carcinoembryonic antigen-related cell adhesion molecule 10               | 3.560451 | 3.92483  | 4.60222  | 3.873023 | 3.382219 | 3.729055 |
| 17474315 | Ceacam11   | carcinoembryonic antigen-related cell adhesion molecule 11               | 11.88854 | 8.008822 | 10.2561  | 9.378453 | 8.569019 | 12.67549 |
| 17474329 | Ceacam12   | carcinoembryonic antigen-related cell adhesion molecule 12               | 3.756476 | 4.674947 | 4.20927  | 4.34468  | 4.073475 | 5.431761 |
| 17474322 | Ceacam13   | carcinoembryonic antigen-related cell adhesion molecule 13               | 2.340165 | 2.82355  | 2.659804 | 2.606909 | 2.5612   | 2.881919 |
| 17474292 | Ceacam14   | carcinoembryonic antigen-related cell adhesion molecule 14               | 3.982157 | 3.243002 | 4.041414 | 2.640864 | 3.488701 | 3.663722 |
| 17486948 | Ceacam15   | carcinoembryonic antigen-related cell adhesion molecule 15               | 3.339703 | 5.310913 | 3.473139 | 2.77287  | 3.370821 | 3.233889 |
| 17487471 | Ceacam16   | carcinoembryonic antigen-related cell adhesion molecule 16               | 7.98936  | 8.240832 | 8.298036 | 12.01263 | 8.093984 | 10.99176 |
| 17477169 | Ceacam18   | carcinoembryonic antigen-related cell adhesion molecule 18               | 2.997147 | 3.393491 | 3.289207 | 3.229991 | 2.522475 | 3.977026 |
| 17487479 | Ceacam19   | carcinoembryonic antigen-related cell adhesion molecule 19               | 8.083219 | 6.571624 | 5.97919  | 5.811538 | 6.030928 | 6.571624 |
| 17487964 | Ceacam2    | carcinoembryonic antigen-related cell adhesion molecule 2                | 15.13923 | 14.02103 | 12.75163 | 9.615288 | 14.86142 | 12.48955 |
| 17474694 | Ceacam20   | carcinoembryonic antigen-related cell adhesion molecule 20               | 9.204696 | 8.646582 | 7.372838 | 7.210404 | 7.291573 | 7.684226 |
| 17474248 | Ceacam3    | carcinoembryonic antigen-related cell adhesion molecule 3                | 7.217854 | 4.895207 | 5.969334 | 5.591247 | 5.058116 | 8.067323 |
| 17474278 | Ceacam5    | carcinoembryonic antigen-related cell adhesion molecule 5                | 2.741414 | 2.796922 | 2.316794 | 2.276851 | 3.308621 | 2.344906 |
| 17474130 | Ceacam9    | carcinoembryonic antigen-related cell adhesion molecule 9                | 3.336464 | 3.992134 | 4.04416  | 3.108072 | 4.402582 | 3.97529  |
| 17486944 | Ceacam-ps1 | carcinoembryonic antigen-related cell adhesion molecule pseudogene 1     | 12.13019 | 7.074117 | 6.992896 | 8.422917 | 8.838981 | 6.771944 |
| 17376649 | Crls1      | cardiolipin synthase 1                                                   | 149.5631 | 161.5739 | 150.022  | 150.0584 | 167.9165 | 128.5967 |
| 17294959 | Cmya5      | cardiomyopathy associated 5                                              | 8.995915 | 9.656297 | 9.717936 | 10.54064 | 10.16029 | 11.99765 |
| 17483420 | Ctf1       | cardiotrophin 1                                                          | 44.10621 | 42.2105  | 41.9198  | 39.62777 | 41.88785 | 40.79018 |
| 17496757 | Ctf2       | cardiotrophin 2                                                          | 3.116939 | 3.490056 | 3.82638  | 3.403479 | 3.630932 | 3.449985 |
| 17356194 | Cicf1      | cardiotrophin-like cytokine factor 1                                     | 9.608891 | 11.57588 | 9.825767 | 11.36275 | 8.559224 | 10.06399 |
| 17383633 | Crat       | carnitine acetyltransferase                                              | 102.9279 | 143.2747 | 173.9333 | 106.0595 | 75.333   | 92.3961  |
| 17530291 | Cdv3       | carnitine deficiency-associated gene expressed in ventricle 3            | 62.84343 | 65.75096 | 61.00688 | 61.25306 | 64.02263 | 74.92421 |
| 17421390 | Gm13238    | carnitine deficiency-associated gene expressed in ventricle 3 pseudogene | 4.63436  | 4.094451 | 3.480754 | 4.178456 | 5.964082 | 5.806988 |
| 17445543 | Crot       | carnitine O-octanoyltransferase                                          | 1925.891 | 1991.597 | 1515.565 | 1562.619 | 1404.051 | 1537.755 |
| 17355915 | Cpt1a      | carnitine palmitoyltransferase 1a, liver                                 | 610.7169 | 760.055  | 820.944  | 727.4327 | 696.7996 | 729.2906 |
| 17490481 | Cpt1c      | carnitine palmitoyltransferase 1c                                        | 5.393755 | 7.814535 | 6.935981 | 7.232829 | 8.025215 | 7.846613 |

|          |           |                                                                       |          |          |          |          |          |          |
|----------|-----------|-----------------------------------------------------------------------|----------|----------|----------|----------|----------|----------|
| 17427961 | Cpt2      | carnitine palmitoyltransferase 2                                      | 356.6512 | 379.7852 | 331.8276 | 344.7078 | 268.8803 | 332.4307 |
| 17355810 | Cndp1     | carosine dipeptidase 1 (metallopeptidase M20 family)                  | 8.968831 | 9.313091 | 8.746283 | 12.68077 | 8.184362 | 9.232747 |
| 17358032 | Carmmt1   | carosine N-methyltransferase 1                                        | 73.43368 | 59.84007 | 56.2636  | 66.01903 | 67.52594 | 64.76399 |
| 17361141 | Carns1    | carosine synthase 1                                                   | 13.9519  | 17.48687 | 15.84494 | 17.48687 | 17.09485 | 17.33998 |
| 17295496 | Cartpt    | CART prepropeptide                                                    | 10.83164 | 10.85818 | 11.25427 | 11.88805 | 12.01063 | 11.4314  |
| 17364828 | Crtac1    | cartilage acidic protein 1                                            | 6.992896 | 5.821738 | 5.38815  | 6.632303 | 5.484994 | 6.694888 |
| 17531877 | Crtap     | cartilage associated protein                                          | 24.98153 | 29.69422 | 36.52722 | 29.88874 | 22.1401  | 31.87095 |
| 17509879 | Cilp2     | cartilage intermediate layer protein 2                                | 15.58871 | 10.03021 | 14.21527 | 12.4291  | 13.89111 | 17.17526 |
| 17518512 | Cilp      | cartilage intermediate layer protein, nucleotide pyrophosphohydrolase | 5.70098  | 6.989019 | 5.209374 | 6.185756 | 10.11567 | 5.110661 |
| 17501919 | Comp      | cartilage oligomeric matrix protein                                   | 5.324367 | 6.029089 | 6.611786 | 6.171709 | 6.992896 | 5.880709 |
| 17380119 | Cass4     | Cas scaffolding protein family member 4                               | 3.954348 | 3.801556 | 3.659585 | 3.751636 | 4.950485 | 4.585376 |
| 17455855 | Casd1     | CAS1 domain containing 1                                              | 82.38673 | 68.91327 | 67.42445 | 70.77461 | 75.91905 | 72.80169 |
| 17438631 | Csn1s1    | casein alpha s1                                                       | 2.133127 | 2.029395 | 1.767181 | 1.85648  | 2.10003  | 2.229855 |
| 17438649 | Csn1s2a   | casein alpha s2-like A                                                | 3.375404 | 2.959883 | 3.124488 | 2.922757 | 3.31606  | 3.729055 |
| 17438661 | Csn1s2b   | casein alpha s2-like B                                                | 2.633753 | 2.395721 | 2.441588 | 2.65187  | 2.71782  | 3.203835 |
| 17449429 | Csn2      | casein beta                                                           | 3.224153 | 3.009888 | 2.935447 | 3.476655 | 2.758798 | 2.766151 |
| 17438697 | Csn3      | casein kappa                                                          | 3.576975 | 3.154847 | 3.426605 | 3.42117  | 3.898773 | 3.432239 |
| 17351111 | Csnk1a1   | casein kinase 1, alpha 1                                              | 152.2069 | 153.4622 | 153.5772 | 152.3103 | 154.7022 | 155.9749 |
| 17273420 | Csnk1d    | casein kinase 1, delta                                                | 62.80076 | 72.93705 | 63.58083 | 67.34458 | 62.73506 | 62.7168  |
| 17319207 | Csnk1e    | casein kinase 1, epsilon                                              | 12.1788  | 13.11413 | 18.12489 | 14.12413 | 10.85547 | 15.18232 |
| 17518644 | Csnk1g1   | casein kinase 1, gamma 1                                              | 20.03416 | 20.22854 | 18.96135 | 19.41258 | 23.80001 | 21.1615  |
| 17235379 | Csnk1g2   | casein kinase 1, gamma 2                                              | 99.26065 | 104.624  | 115.0933 | 98.98788 | 106.2184 | 100.7733 |
| 17350656 | Csnk1g3   | casein kinase 1, gamma 3                                              | 96.08704 | 106.3473 | 93.84448 | 103.1614 | 127.774  | 100.2515 |
| 17377675 | Csnk2a1   | casein kinase 2, alpha 1 polypeptide                                  | 159.896  | 155.9889 | 156.8824 | 164.8626 | 161.3142 | 169.3695 |
| 17331403 | Csnk2zip  | casein kinase 2, alpha prime interacting protein                      | 3.423804 | 4.128592 | 3.194588 | 3.895531 | 3.291967 | 3.470564 |
| 17512009 | Csnk2a2   | casein kinase 2, alpha prime polypeptide                              | 72.52015 | 66.88218 | 64.81654 | 69.29743 | 76.19001 | 63.02796 |
| 17344221 | Csnk2b    | casein kinase 2, beta polypeptide                                     | 262.0957 | 247.3414 | 229.298  | 206.9101 | 225.07   | 239.8419 |
| 17518526 | Clpx      | caseinolytic mitochondrial matrix peptidase chaperone subunit         | 321.1737 | 233.4274 | 193.9526 | 315.6561 | 230.573  | 252.0419 |
| 17338925 | Clpp      | caseinolytic mitochondrial matrix peptidase proteolytic subunit       | 67.67401 | 67.98761 | 58.77416 | 64.25781 | 63.35735 | 64.22798 |
| 17526130 | Cbl       | Casitas B-lineage lymphoma                                            | 25.1403  | 27.70453 | 29.11721 | 25.25435 | 26.34633 | 22.40253 |
| 17326208 | Cblb      | Casitas B-lineage lymphoma b                                          | 41.77911 | 46.85204 | 54.75353 | 37.64405 | 31.36862 | 41.18337 |
| 17487440 | Cblc      | Casitas B-lineage lymphoma c                                          | 20.30636 | 18.0727  | 24.15534 | 25.18373 | 17.86223 | 20.39551 |
| 17280515 | Cbl1      | Casitas B-lineage lymphoma-like 1                                     | 46.70386 | 40.95081 | 41.11207 | 33.85718 | 36.58778 | 37.22887 |
| 17334275 | Caskin1   | CASK interacting protein 1                                            | 11.70433 | 7.286318 | 9.310251 | 7.996674 | 7.824237 | 8.272825 |
| 17272019 | Caskin2   | CASK-interacting protein 2                                            | 16.93422 | 10.72436 | 13.86264 | 13.86264 | 9.812495 | 10.75481 |
| 17244476 | Cradd     | CASP2 and RIPK1 domain containing adaptor with death domain           | 30.56355 | 29.42499 | 30.84148 | 33.40125 | 31.64159 | 35.1609  |
| 17213192 | Cflar     | CASP8 and FADD-like apoptosis regulator                               | 104.6719 | 78.10105 | 74.29998 | 66.36129 | 77.34092 | 62.83559 |
| 17514424 | Casp1     | caspase 1                                                             | 12.0004  | 12.04306 | 11.15903 | 10.97212 | 12.03371 | 9.69009  |
| 17514447 | Casp12    | caspase 12                                                            | 5.2423   | 5.036355 | 4.247842 | 3.973444 | 5.036355 | 4.936197 |
| 17242548 | Casp14    | caspase 14                                                            | 5.778159 | 5.435716 | 5.398692 | 5.372747 | 5.707623 | 5.770115 |
| 17341484 | Casp16-ps | caspase 16, apoptosis-related cysteine peptidase, pseudogene          | 23.93766 | 24.36114 | 21.1615  | 20.2982  | 21.1615  | 17.33397 |
| 17457892 | Casp2     | caspase 2                                                             | 16.33087 | 16.41008 | 18.49649 | 16.33087 | 14.8574  | 15.90744 |
| 17501041 | Casp3     | caspase 3                                                             | 21.02349 | 15.07682 | 22.11526 | 15.53952 | 19.46513 | 16.75593 |
| 17514435 | Casp4     | caspase 4, apoptosis-related cysteine peptidase                       | 6.022865 | 6.287864 | 6.287864 | 5.415896 | 5.570512 | 5.300616 |
| 17402595 | Casp6     | caspase 6                                                             | 25.53086 | 35.629   | 35.5301  | 30.06702 | 34.17075 | 43.9524  |
| 17360561 | Casp7     | caspase 7                                                             | 57.93768 | 56.08916 | 61.75782 | 75.00475 | 62.8443  | 63.74057 |
| 17213213 | Casp8     | caspase 8                                                             | 152.2227 | 125.4032 | 131.6469 | 123.1882 | 86.78898 | 88.01576 |
| 17412404 | Casp8ap2  | caspase 8 associated protein 2                                        | 16.99679 | 15.44941 | 12.28946 | 14.60621 | 14.02657 | 18.76666 |
| 17213189 | Gm20257   | caspase 8 pseudogene                                                  | 3.878288 | 3.013876 | 4.945992 | 4.046992 | 5.821214 | 3.094444 |
| 17421120 | Casp9     | caspase 9                                                             | 20.58155 | 23.67397 | 25.46564 | 26.26264 | 25.17553 | 26.26264 |
| 17427222 | Caap1     | caspase activity and apoptosis inhibitor 1                            | 5.831997 | 5.139935 | 7.512328 | 5.386134 | 9.49758  | 6.259858 |
| 17427229 | Caap1     | caspase activity and apoptosis inhibitor 1                            | 16.38189 | 18.47599 | 16.84875 | 13.90228 | 17.378   | 17.60142 |
| 17319063 | Card10    | caspase recruitment domain family, member 10                          | 10.93181 | 13.91511 | 13.1407  | 14.31296 | 12.6468  | 10.29855 |
| 17454627 | Card11    | caspase recruitment domain family, member 11                          | 8.317673 | 7.249744 | 8.05732  | 8.840758 | 6.660221 | 7.106405 |
| 17259026 | Card14    | caspase recruitment domain family, member 14                          | 5.202554 | 5.06738  | 6.238893 | 5.031784 | 5.131    | 5.864182 |
| 17315705 | Card6     | caspase recruitment domain family, member 6                           | 6.992896 | 5.990722 | 8.380405 | 8.688096 | 8.231983 | 10.39797 |
| 17382920 | Card9     | caspase recruitment domain family, member 9                           | 8.10246  | 8.322979 | 7.628768 | 7.952453 | 7.126037 | 8.422859 |
| 17421735 | Cas21     | castor zinc finger 1                                                  | 10.09158 | 11.94877 | 10.19097 | 8.772694 | 7.201912 | 7.938795 |
| 17462373 | Cecr2     | cat eye syndrome chromosome region, candidate 2                       | 27.12705 | 27.02308 | 26.87662 | 32.65858 | 29.23065 | 31.66155 |
| 17470435 | Cecr5     | cat eye syndrome chromosome region, candidate 5                       | 56.67341 | 47.44815 | 42.55126 | 52.55915 | 40.19182 | 51.20739 |
| 17470433 | Cecr6     | cat eye syndrome chromosome region, candidate 6                       | 5.95904  | 5.617429 | 5.617429 | 5.617429 | 5.617429 | 5.617429 |
| 17388803 | Cat       | catalase                                                              | 4632.066 | 4502.467 | 4005.01  | 4066.156 | 3393.645 | 3674.214 |
| 17328937 | Comt      | catechol-O-methyltransferase                                          | 648.8989 | 648.3999 | 645.4269 | 727.4781 | 615.2419 | 518.6976 |
| 17303979 | Comtd1    | catechol-O-methyltransferase domain containing 1                      | 13.86177 | 16.27336 | 17.25497 | 11.49066 | 14.21094 | 13.21615 |
| 17349520 | Ctnna1    | catenin (cadherin associated protein), alpha 1                        | 141.6081 | 147.0018 | 164.6148 | 139.2892 | 147.0018 | 143.1129 |
| 17467938 | Ctnna2    | catenin (cadherin associated protein), alpha 2                        | 3.286701 | 2.914725 | 3.869052 | 3.457694 | 3.250654 | 3.219976 |
| 17233930 | Ctnna3    | catenin (cadherin associated protein), alpha 3                        | 4.098795 | 4.929085 | 4.694918 | 4.495838 | 4.273387 | 4.31458  |
| 17425466 | Ctnnal1   | catenin (cadherin associated protein), alpha-like 1                   | 10.29256 | 8.827898 | 10.03216 | 11.48079 | 10.35345 | 10.45514 |
| 17523257 | Ctnnb1    | catenin (cadherin associated protein), beta 1                         | 204.5997 | 187.5511 | 191.1882 | 194.0709 | 179.7864 | 169.494  |
| 17387432 | Ctnnd1    | catenin (cadherin associated protein), delta 1                        | 90.12279 | 91.69429 | 91.69429 | 94.65324 | 99.69091 | 95.87349 |
| 17310772 | Ctnnd2    | catenin (cadherin associated protein), delta 2                        | 7.028564 | 8.148136 | 7.028564 | 6.868952 | 7.028564 | 6.206242 |
| 17421821 | Ctnnbip1  | catenin beta interacting protein 1                                    | 23.2805  | 22.62789 | 21.58145 | 24.07026 | 21.95397 | 25.15355 |
| 17378754 | Ctnnb1    | catenin, beta like 1                                                  | 45.11296 | 43.21889 | 36.83486 | 43.72783 | 29.86161 | 38.59307 |
| 17531482 | Camp      | cathelicidin antimicrobial peptide                                    | 3.714557 | 3.313119 | 3.331149 | 3.169642 | 4.599031 | 3.458508 |
| 17293454 | Cts3      | cathepsin 3                                                           | 4.791509 | 4.10414  | 5.107085 | 5.500299 | 5.499536 | 4.526607 |
| 17293408 | Cts6      | cathepsin 6                                                           | 2.406006 | 2.420844 | 1.985304 | 2.192733 | 2.458673 | 4.395295 |
| 17293434 | Cts7      | cathepsin 7                                                           | 2.568222 | 2.865963 | 3.031622 | 2.968677 | 3.651831 | 2.432483 |
| 17293418 | Cts8      | cathepsin 8                                                           | 2.585548 | 3.192862 | 2.67402  | 2.703578 | 2.871232 | 3.102282 |
| 17293428 | Cts8-ps   | cathepsin 8, pseudogene                                               | 4.198838 | 3.808862 | 4.268562 | 4.063154 | 4.424241 | 4.320385 |
| 17379560 | Ctsa      | cathepsin A                                                           | 172.213  | 201.4224 | 228.3432 | 164.858  | 181.2328 | 157.9255 |
| 17301213 | Ctsb      | cathepsin B                                                           | 1330.839 | 1416.24  | 1582.818 | 1172.962 | 1086.566 | 1076.453 |
| 17480018 | Ctsc      | cathepsin C                                                           | 283.4656 | 277.9728 | 275.7792 | 201.4391 | 257.0259 | 193.09   |
| 17498099 | Ctsd      | cathepsin D                                                           | 439.6343 | 569.1046 | 638.1315 | 479.92   | 502.9531 | 519.5072 |
| 17217035 | Ctse      | cathepsin E                                                           | 9.643254 | 12.46309 | 14.31256 | 8.679067 | 8.185497 | 7.486493 |

|          |              |                                                                                   |          |          |          |          |          |          |
|----------|--------------|-----------------------------------------------------------------------------------|----------|----------|----------|----------|----------|----------|
| 17356288 | Ctsf         | cathepsin F                                                                       | 29.77274 | 29.49053 | 31.01813 | 31.85372 | 30.55571 | 30.88276 |
| 17306975 | Ctsf         | cathepsin G                                                                       | 7.972101 | 4.886529 | 4.801649 | 4.886529 | 4.620215 | 4.801649 |
| 17520233 | Ctsh         | cathepsin H                                                                       | 235.7918 | 241.1187 | 247.2283 | 219.3788 | 224.5838 | 223.6362 |
| 17293376 | Ctsj         | cathepsin J                                                                       | 5.868452 | 5.663799 | 5.964991 | 7.436532 | 5.338965 | 5.127551 |
| 17400365 | Ctsk         | cathepsin K                                                                       | 4.82283  | 4.367053 | 5.537712 | 5.993339 | 5.480775 | 5.865036 |
| 17293706 | Ctsl         | cathepsin L                                                                       | 447.3561 | 519.972  | 613.832  | 552.856  | 655.3719 | 608.5365 |
| 17293328 | Ctsll3       | cathepsin L-like 3                                                                | 4.756334 | 4.446561 | 3.765862 | 3.758325 | 4.196335 | 4.16048  |
| 17293444 | Ctsm         | cathepsin M                                                                       | 1.989781 | 2.00233  | 2.19217  | 2.195105 | 2.019629 | 2.491751 |
| 17398430 | Ctso         | cathepsin O                                                                       | 117.8624 | 118.9161 | 143.9716 | 116.7946 | 113.1239 | 136.665  |
| 17293386 | Ctsq         | cathepsin Q                                                                       | 4.025143 | 2.581608 | 4.686465 | 3.874553 | 3.730606 | 3.869186 |
| 17293397 | Ctsr         | cathepsin R                                                                       | 3.461506 | 3.30445  | 3.276624 | 3.475716 | 4.285341 | 3.323838 |
| 17400375 | Ctss         | cathepsin S                                                                       | 179.4838 | 207.2732 | 232.3217 | 144.9478 | 196.8646 | 166.2108 |
| 17361605 | Ctsw         | cathepsin W                                                                       | 6.805589 | 6.514119 | 5.874394 | 7.544734 | 5.935049 | 5.374721 |
| 17395155 | Ctsz         | cathepsin Z                                                                       | 436.4462 | 471.3223 | 494.0455 | 422.0236 | 460.8297 | 405.9927 |
| 17356389 | Catsper1     | cation channel, sperm associated 1                                                | 3.829856 | 3.846243 | 3.495454 | 3.371428 | 3.836897 | 4.03218  |
| 17390561 | Catsper2     | cation channel, sperm associated 2                                                | 7.240905 | 10.63767 | 7.76906  | 7.698994 | 7.834656 | 6.616967 |
| 17287777 | Catsper3     | cation channel, sperm associated 3                                                | 3.262437 | 2.916746 | 3.262437 | 3.262437 | 3.780403 | 2.769681 |
| 17431216 | Catsper4     | cation channel, sperm associated 4                                                | 6.929878 | 6.543851 | 6.543851 | 7.115672 | 5.767316 | 6.217437 |
| 17277978 | Catsperb     | catsper channel auxiliary subunit beta                                            | 3.245701 | 2.78626  | 3.102863 | 2.685275 | 3.785516 | 2.901925 |
| 17338826 | Catsperd     | catsper channel auxiliary subunit delta                                           | 3.346447 | 3.136705 | 3.474704 | 3.109624 | 3.181352 | 3.649124 |
| 17488752 | Catsperg1    | catsper channel auxiliary subunit gamma 1                                         | 10.98254 | 13.75601 | 11.39485 | 11.39485 | 9.850248 | 10.23096 |
| 17488850 | Catsperg2    | catsper channel auxiliary subunit gamma 2                                         | 3.430075 | 5.160425 | 4.032851 | 3.57197  | 6.021697 | 4.595239 |
| 17354698 | Cdx1         | caudal type homeobox 1                                                            | 13.524   | 11.23548 | 11.21168 | 11.96966 | 11.69241 | 10.64335 |
| 17455307 | Cdx2         | caudal type homeobox 2                                                            | 7.140277 | 6.55134  | 6.55134  | 6.078014 | 7.739981 | 8.764914 |
| 17536954 | Cdx4         | caudal type homeobox 4                                                            | 3.883991 | 3.883991 | 3.68831  | 3.756554 | 4.015724 | 3.37234  |
| 17456161 | Cav1         | caveolin 1, caveolae protein                                                      | 12.03521 | 9.481925 | 10.18299 | 8.097968 | 10.93529 | 8.420524 |
| 17456152 | Cav2         | caveolin 2                                                                        | 16.79675 | 15.37101 | 15.31581 | 16.75442 | 15.23239 | 12.2772  |
| 17461489 | Cav3         | caveolin 3                                                                        | 4.292565 | 4.762008 | 3.310181 | 3.756841 | 4.704691 | 4.258632 |
| 17543664 | Cited1       | Cbp/p300-interacting transactivator with Glu/Asp-rich carboxy-terminal domain 1   | 18.81876 | 25.31324 | 20.93914 | 22.53866 | 17.69905 | 25.96345 |
| 17231784 | Cited2       | Cbp/p300-interacting transactivator, with Glu/Asp-rich carboxy-terminal domain, 2 | 91.78459 | 68.91136 | 88.03773 | 84.07121 | 94.44614 | 94.31269 |
| 17418035 | Cited4       | Cbp/p300-interacting transactivator, with Glu/Asp-rich carboxy-terminal domain, 4 | 10.34226 | 11.39461 | 16.46899 | 12.2171  | 11.16855 | 14.57961 |
| 17355463 | Ctif         | CBP80/20-dependent translation initiation factor                                  | 60.02202 | 64.24267 | 68.05834 | 57.916   | 63.01223 | 47.0685  |
| 17434087 | LOC100043918 | C-C motif chemokine 19-like                                                       | 19.0289  | 19.85843 | 23.87916 | 18.02116 | 19.62866 | 19.42119 |
| 17412973 | LOC100043921 | C-C motif chemokine 19-like                                                       | 16.63881 | 15.6603  | 22.7515  | 16.56631 | 15.89829 | 16.86406 |
| 17413084 | LOC100043921 | C-C motif chemokine 19-like                                                       | 16.63881 | 15.6603  | 22.7515  | 16.56631 | 15.89829 | 16.86406 |
| 17434141 | LOC100043921 | C-C motif chemokine 19-like                                                       | 18.60811 | 18.17571 | 26.30381 | 19.48484 | 20.36599 | 20.01001 |
| 17434105 | LOC100041504 | C-C motif chemokine 21c                                                           | 15.01945 | 13.95219 | 17.6711  | 14.8325  | 13.61401 | 16.51426 |
| 17476728 | Cebpa        | CCAAT/enhancer binding protein (C/EBP), alpha                                     | 175.1164 | 208.9683 | 230.2728 | 238.3834 | 214.4281 | 276.5257 |
| 17379938 | Cebpb        | CCAAT/enhancer binding protein (C/EBP), beta                                      | 111.5642 | 125.8813 | 128.5557 | 118.3782 | 125.082  | 120.8799 |
| 17323297 | Cebpd        | CCAAT/enhancer binding protein (C/EBP), delta                                     | 9.168972 | 9.622155 | 7.011436 | 8.353727 | 10.1236  | 7.175603 |
| 17306472 | Cebpe        | CCAAT/enhancer binding protein (C/EBP), epsilon                                   | 27.80476 | 26.61966 | 24.42777 | 21.44248 | 23.67102 | 24.42777 |
| 17489707 | Cebpg        | CCAAT/enhancer binding protein (C/EBP), gamma                                     | 80.8295  | 73.10915 | 92.06175 | 71.59069 | 80.09443 | 69.53802 |
| 17339858 | Cebpz        | CCAAT/enhancer binding protein (C/EBP), zeta, opposite strand                     | 25.45205 | 31.79394 | 26.97779 | 37.10238 | 41.52016 | 33.01867 |
| 17347387 | Cebpz        | CCAAT/enhancer binding protein zeta                                               | 52.61091 | 45.14487 | 37.89433 | 43.60676 | 49.9551  | 43.08489 |
| 17504861 | Ctcf         | CCCTC-binding factor                                                              | 60.00081 | 47.52023 | 48.43742 | 48.04019 | 53.63527 | 45.53803 |
| 17395063 | Ctcf         | CCCTC-binding factor (zinc finger protein)-like                                   | 7.144534 | 7.431122 | 7.783991 | 8.246489 | 7.256128 | 7.621844 |
| 17380211 | Ctcf         | CCCTC-binding factor (zinc finger protein)-like, opposite strand                  | 23.74118 | 39.40837 | 46.22816 | 44.65872 | 30.52205 | 32.50748 |
| 17512032 | Cnot1        | CCR4-NOT transcription complex, subunit 1                                         | 189.3406 | 189.1766 | 179.4938 | 179.4938 | 170.0789 | 175.6829 |
| 17531900 | Cnot10       | CCR4-NOT transcription complex, subunit 10                                        | 29.995   | 29.88563 | 29.24058 | 28.31628 | 29.61569 | 29.4101  |
| 17212123 | Cnot11       | CCR4-NOT transcription complex, subunit 11                                        | 31.67033 | 29.67755 | 30.8984  | 36.5746  | 36.24098 | 31.72944 |
| 17245095 | Cnot2        | CCR4-NOT transcription complex, subunit 2                                         | 85.08955 | 85.07716 | 81.22264 | 86.84976 | 87.37024 | 87.05891 |
| 17473193 | Cnot3        | CCR4-NOT transcription complex, subunit 3                                         | 40.24172 | 45.15895 | 40.67386 | 42.30306 | 39.35623 | 39.96707 |
| 17465788 | Cnot4        | CCR4-NOT transcription complex, subunit 4                                         | 61.85464 | 81.42162 | 65.60437 | 62.6716  | 58.95491 | 56.20202 |
| 17262277 | Cnot6        | CCR4-NOT transcription complex, subunit 6                                         | 72.23519 | 73.63399 | 72.23519 | 72.13312 | 73.01849 | 72.8133  |
| 17449899 | Cnot6l       | CCR4-NOT transcription complex, subunit 6-like                                    | 136.3216 | 146.116  | 122.1652 | 139.8455 | 126.6901 | 127.0163 |
| 17508868 | Cnot7        | CCR4-NOT transcription complex, subunit 7                                         | 22.22867 | 23.68333 | 21.38771 | 21.37126 | 22.03599 | 23.96405 |
| 17249950 | Cnot8        | CCR4-NOT transcription complex, subunit 8                                         | 48.71385 | 40.94683 | 36.30912 | 43.57866 | 36.61417 | 44.07199 |
| 17454919 | Ccz1         | CCZ1 vacuolar protein trafficking and biogenesis associated                       | 62.9773  | 71.45683 | 68.157   | 71.83575 | 71.73822 | 74.10659 |
| 17408470 | Cd101        | CD101 antigen                                                                     | 6.739072 | 7.093462 | 8.303215 | 6.91117  | 7.935109 | 6.155645 |
| 17519738 | Cd109        | CD109 antigen                                                                     | 2.67402  | 3.427413 | 2.692731 | 2.420978 | 3.138054 | 3.376293 |
| 17353747 | Cd14         | CD14 antigen                                                                      | 14.57496 | 19.10767 | 29.57139 | 21.01037 | 15.75983 | 17.69684 |
| 17484940 | Cd151        | CD151 antigen                                                                     | 93.06134 | 89.61572 | 92.49862 | 98.68302 | 72.89056 | 72.93048 |
| 17408123 | Cd160        | CD160 antigen                                                                     | 3.282784 | 3.834398 | 4.20927  | 4.592787 | 4.20927  | 4.20927  |
| 17462843 | Cd163        | CD163 antigen                                                                     | 38.32623 | 47.69017 | 56.75675 | 44.54804 | 42.07729 | 35.36107 |
| 17484513 | Cd163l1      | CD163 molecule-like 1                                                             | 5.414207 | 5.974343 | 4.369596 | 4.224205 | 5.774956 | 4.102149 |
| 17232892 | Cd164        | CD164 antigen                                                                     | 484.7644 | 475.0317 | 447.837  | 410.9617 | 441.0016 | 436.1408 |
| 17419543 | Cd164l2      | CD164 sialomucin-like 2                                                           | 14.30205 | 13.6226  | 15.27627 | 12.91763 | 9.591191 | 13.47441 |
| 17487759 | Cd177        | CD177 antigen                                                                     | 6.171709 | 7.690514 | 7.334761 | 8.101112 | 7.334761 | 7.334761 |
| 17289527 | Cd180        | CD180 antigen                                                                     | 6.487893 | 7.425304 | 10.19507 | 6.568573 | 5.354493 | 6.568573 |
| 17496193 | Cd19         | CD19 antigen                                                                      | 6.903414 | 7.250096 | 6.939877 | 7.931644 | 7.377848 | 7.154545 |
| 17406482 | Cd1d1        | CD1d1 antigen                                                                     | 76.78007 | 79.24841 | 52.96106 | 77.67401 | 65.73865 | 82.21616 |
| 17398723 | Cd1d2        | CD1d2 antigen                                                                     | 2.923345 | 3.773858 | 3.290644 | 3.703322 | 2.885977 | 2.958693 |
| 17408497 | Cd2          | CD2 antigen                                                                       | 6.791875 | 8.5632   | 7.642793 | 8.51685  | 8.108191 | 9.152336 |
| 17496605 | Cd2bp2       | CD2 antigen (cytoplasmic tail) binding protein 2                                  | 40.25399 | 42.43139 | 44.16005 | 38.64768 | 40.53763 | 42.34207 |
| 17330625 | Cd200        | CD200 antigen                                                                     | 5.186136 | 5.530462 | 5.596132 | 5.439409 | 7.520143 | 5.439409 |
| 17325861 | Cd200r1      | CD200 receptor 1                                                                  | 4.70267  | 4.594284 | 4.383095 | 4.240575 | 4.378844 | 5.266301 |
| 17325884 | Cd200r2      | CD200 receptor 2                                                                  | 3.854918 | 3.993379 | 5.366792 | 3.834796 | 4.789516 | 3.854918 |
| 17325892 | Cd200r3      | CD200 receptor 3                                                                  | 3.347862 | 4.188257 | 3.746205 | 3.263862 | 3.768473 | 3.697653 |
| 17325874 | Cd200r4      | CD200 receptor 4                                                                  | 2.406006 | 4.33178  | 3.40657  | 4.038949 | 3.498169 | 2.929917 |
| 17468222 | Cd207        | CD207 antigen                                                                     | 11.97613 | 9.9503   | 13.20397 | 17.62975 | 8.895465 | 14.171   |
| 17507161 | Cd209a       | CD209a antigen                                                                    | 4.79038  | 6.474371 | 6.474371 | 7.024327 | 6.672882 | 5.948393 |
| 17507194 | Cd209b       | CD209b antigen                                                                    | 4.20927  | 4.411319 | 4.20927  | 4.379785 | 3.581391 | 3.359881 |
| 17507209 | Cd209c       | CD209c antigen                                                                    | 3.885607 | 4.111885 | 4.025199 | 3.557787 | 5.174072 | 4.681952 |
| 17507184 | Cd209d       | CD209d antigen                                                                    | 3.555987 | 2.450184 | 3.555987 | 2.865188 | 4.491726 | 2.936016 |

|          |          |                                                                                    |          |          |          |          |          |          |
|----------|----------|------------------------------------------------------------------------------------|----------|----------|----------|----------|----------|----------|
| 17507175 | Cd209e   | CD209e antigen                                                                     | 2.595442 | 2.197251 | 2.541218 | 3.585315 | 3.129907 | 2.801928 |
| 17507221 | Cd209f   | CD209f antigen                                                                     | 3.310892 | 3.476679 | 3.617242 | 2.765921 | 3.47774  | 3.838599 |
| 17498750 | Cd209g   | CD209g antigen                                                                     | 7.681138 | 3.881462 | 5.570474 | 6.022865 | 4.892053 | 5.155527 |
| 17489320 | Cd22     | CD22 antigen                                                                       | 7.225813 | 11.50884 | 8.727449 | 8.676661 | 7.100497 | 8.436415 |
| 17352330 | Cd226    | CD226 antigen                                                                      | 6.068374 | 4.20927  | 3.844324 | 4.560747 | 3.823225 | 4.832233 |
| 17219382 | Cd244    | CD244 natural killer cell receptor 2B4                                             | 5.134736 | 3.706455 | 4.20927  | 3.645609 | 6.086108 | 4.130167 |
| 17219011 | Cd247    | CD247 antigen                                                                      | 7.148894 | 6.337835 | 7.214353 | 7.844438 | 7.610335 | 8.783464 |
| 17356369 | Cd248    | CD248 antigen, endosialin                                                          | 11.82419 | 13.44064 | 13.5911  | 14.42301 | 10.31127 | 13.31813 |
| 17233022 | Cd24a    | CD24a antigen                                                                      | 19.47188 | 27.29604 | 18.17798 | 21.06623 | 18.50214 | 20.46391 |
| 17471073 | Cd27     | CD27 antigen                                                                       | 4.681043 | 3.515037 | 4.799087 | 4.93182  | 4.163769 | 3.339703 |
| 17358544 | Cd274    | CD274 antigen                                                                      | 16.76453 | 15.01716 | 15.01716 | 13.39423 | 15.01716 | 13.98376 |
| 17527719 | Cd276    | CD276 antigen                                                                      | 32.37145 | 32.13448 | 31.49564 | 32.97498 | 26.80221 | 32.13448 |
| 17213462 | Cd28     | CD28 antigen                                                                       | 4.047273 | 5.007845 | 3.960136 | 4.634295 | 4.528584 | 6.491402 |
| 17345038 | Cd2ap    | CD2-associated protein                                                             | 134.6136 | 134.6593 | 146.3085 | 128.1012 | 108.7808 | 132.7649 |
| 17516691 | Cd3d     | CD3 antigen, delta polypeptide                                                     | 7.870689 | 5.821738 | 5.700071 | 6.935789 | 5.09118  | 8.405712 |
| 17526464 | Cd3e     | CD3 antigen, epsilon polypeptide                                                   | 10.29855 | 13.46703 | 10.26798 | 8.51685  | 10.85088 | 10.24601 |
| 17526456 | Cd3g     | CD3 antigen, gamma polypeptide                                                     | 8.151356 | 6.308732 | 5.935378 | 5.281618 | 6.033228 | 6.333048 |
| 17271710 | Cd300lb  | CD300 antigen like family member B                                                 | 6.477827 | 6.517732 | 7.860004 | 6.916442 | 4.830659 | 5.56106  |
| 17271776 | Cd300lf  | CD300 antigen like family member F                                                 | 4.739977 | 5.337152 | 5.337485 | 5.386134 | 6.588545 | 5.673189 |
| 17256870 | Cd300lg  | CD300 antigen like family member G                                                 | 36.02783 | 39.85752 | 40.00754 | 44.25719 | 23.92356 | 29.96113 |
| 17271763 | Cd300lh  | CD300 antigen like family member H                                                 | 20.39933 | 43.99904 | 26.43395 | 29.48358 | 29.85747 | 24.12221 |
| 17271724 | Cd300ld  | CD300 molecule-like family member d                                                | 36.75478 | 36.36781 | 61.29298 | 32.29435 | 25.18705 | 30.41413 |
| 17258107 | Cd300a   | CD300A antigen                                                                     | 11.06944 | 10.25873 | 12.31786 | 8.70781  | 8.415098 | 6.639203 |
| 17271719 | Cd300c   | CD300C antigen                                                                     | 17.09864 | 15.84867 | 15.6333  | 17.09864 | 16.4136  | 17.64638 |
| 17271769 | Cd300e   | CD300e antigen                                                                     | 16.14494 | 22.64703 | 22.22806 | 22.1702  | 20.62826 | 14.24082 |
| 17385564 | Cd302    | CD302 antigen                                                                      | 232.2331 | 221.7223 | 223.7199 | 181.2026 | 256.9671 | 240.2845 |
| 17336199 | Cd320    | CD320 antigen                                                                      | 9.290395 | 10.10061 | 11.6963  | 9.992738 | 6.118551 | 11.88179 |
| 17490149 | Cd33     | CD33 antigen                                                                       | 11.08095 | 11.9304  | 11.06123 | 12.35189 | 9.835715 | 9.986644 |
| 17221014 | Cd34     | CD34 antigen                                                                       | 8.888069 | 9.89754  | 13.0829  | 8.707871 | 8.534283 | 10.80555 |
| 17445715 | Cd36     | CD36 antigen                                                                       | 632.3458 | 660.9421 | 708.4342 | 581.3326 | 554.5563 | 616.7534 |
| 17490702 | Cd37     | CD37 antigen                                                                       | 14.80036 | 16.42931 | 16.81737 | 17.80561 | 12.69721 | 19.13802 |
| 17437213 | Cd38     | CD38 antigen                                                                       | 44.22162 | 46.56745 | 64.19371 | 45.3217  | 39.76921 | 32.52461 |
| 17487218 | Cd3eap   | CD3E antigen, epsilon polypeptide associated protein                               | 13.14626 | 12.88303 | 13.14626 | 11.80225 | 15.60861 | 10.18299 |
| 17470960 | Cd4      | CD4 antigen                                                                        | 5.431083 | 5.33804  | 7.30594  | 5.37953  | 4.932811 | 6.083198 |
| 17379659 | Cd40     | CD40 antigen                                                                       | 7.732045 | 8.939536 | 6.992799 | 12.20314 | 8.818235 | 7.372531 |
| 17535048 | Cd40lg   | CD40 ligand                                                                        | 3.14849  | 3.549707 | 3.03465  | 3.485776 | 3.263862 | 3.776841 |
| 17388733 | Cd44     | CD44 antigen                                                                       | 11.8878  | 16.17832 | 25.2512  | 14.09323 | 12.38807 | 10.52961 |
| 17231287 | Cd46     | CD46 antigen, complement regulatory protein                                        | 5.139329 | 5.749833 | 5.673465 | 5.546048 | 5.02262  | 6.992556 |
| 17326166 | Cd47     | CD47 antigen (Rh-related antigen, integrin-associated signal transducer)           | 206.0471 | 186.2053 | 190.2708 | 191.4322 | 152.9218 | 182.6275 |
| 17219397 | Cd48     | CD48 antigen                                                                       | 9.829445 | 13.76268 | 11.56746 | 9.829445 | 9.829445 | 9.718004 |
| 17362753 | Cd5      | CD5 antigen                                                                        | 9.362605 | 9.915393 | 8.283727 | 8.732774 | 7.824833 | 9.860631 |
| 17398734 | Cd5l     | CD5 antigen-like                                                                   | 150.8541 | 220.7424 | 246.725  | 164.0748 | 154.8707 | 162.6402 |
| 17431174 | Cd52     | CD52 antigen                                                                       | 17.29904 | 19.70842 | 23.70172 | 19.2956  | 19.30456 | 17.59837 |
| 17408960 | Cd53     | CD53 antigen                                                                       | 37.29447 | 38.38152 | 51.44646 | 36.97684 | 31.58987 | 36.97684 |
| 17226618 | Cd55     | CD55 molecule, decay accelerating factor for complement                            | 17.68777 | 23.54012 | 22.29673 | 22.94297 | 20.76296 | 13.07193 |
| 17226622 | Cd55     | CD55 molecule, decay accelerating factor for complement                            | 27.52613 | 34.26776 | 33.2101  | 28.24258 | 17.1699  | 22.10606 |
| 17226605 | Cd55b    | CD55 molecule, decay accelerating factor for complement B                          | 4.879421 | 4.091018 | 3.366058 | 5.14193  | 4.890595 | 4.284569 |
| 17373825 | Cd59a    | CD59a antigen                                                                      | 200.6379 | 234.8165 | 181.1612 | 171.6671 | 133.4356 | 146.6365 |
| 17373817 | Cd59b    | CD59b antigen                                                                      | 21.66148 | 21.40847 | 12.0739  | 22.4277  | 11.53695 | 18.80286 |
| 17362765 | Cd6      | CD6 antigen                                                                        | 7.073381 | 9.348987 | 8.321768 | 10.36013 | 8.497686 | 9.280548 |
| 17238594 | Cd63     | CD63 antigen                                                                       | 22.44543 | 43.96123 | 51.10456 | 25.33131 | 17.52837 | 19.68139 |
| 17264835 | Cd68     | CD68 antigen                                                                       | 45.06108 | 69.65234 | 118.1847 | 57.61011 | 61.17923 | 50.20538 |
| 17471502 | Cd69     | CD69 antigen                                                                       | 4.462277 | 3.666059 | 3.073069 | 3.542137 | 3.418563 | 3.381398 |
| 17273440 | Cd7      | CD7 antigen                                                                        | 6.900304 | 7.050571 | 5.243572 | 7.689128 | 7.655412 | 6.317834 |
| 17346516 | Cd70     | CD70 antigen                                                                       | 2.67402  | 3.198333 | 4.142725 | 2.943842 | 3.542432 | 2.911898 |
| 17424608 | Cd72     | CD72 antigen                                                                       | 13.31758 | 16.03742 | 17.37463 | 14.55305 | 13.61797 | 11.81797 |
| 17350982 | Cd74     | CD74 antigen (invariant polypeptide of major histocompatibility complex, class II) | 156.9009 | 155.2328 | 149.9689 | 59.96216 | 121.7114 | 108.1478 |
| 17475127 | Cd79a    | CD79A antigen (immunoglobulin-associated alpha)                                    | 6.516422 | 5.351747 | 5.226554 | 5.09065  | 5.197796 | 4.348537 |
| 17270837 | Cd79b    | CD79B antigen                                                                      | 6.449959 | 6.192921 | 6.674177 | 6.990473 | 7.187002 | 7.642158 |
| 17459482 | Cd8a     | CD8 antigen, alpha chain                                                           | 4.596068 | 4.37393  | 5.074761 | 4.493937 | 6.370029 | 4.16553  |
| 17459474 | Cd8b1    | CD8 antigen, beta chain 1                                                          | 8.138766 | 7.674219 | 8.042979 | 9.508053 | 6.102202 | 6.804598 |
| 17325608 | Cd80     | CD80 antigen                                                                       | 7.488309 | 9.245876 | 6.999782 | 6.885923 | 6.629684 | 6.91208  |
| 17485297 | Cd81     | CD81 antigen                                                                       | 1047.322 | 1229.069 | 1279.274 | 913.5374 | 938.869  | 940.9733 |
| 17388454 | Cd82     | CD82 antigen                                                                       | 40.33918 | 41.13373 | 43.66968 | 40.89181 | 39.86194 | 32.38065 |
| 17286905 | Cd83     | CD83 antigen                                                                       | 13.59326 | 12.63514 | 15.06616 | 14.34057 | 13.36224 | 15.16097 |
| 17219418 | Cd84     | CD84 antigen                                                                       | 12.80877 | 17.89519 | 22.96126 | 16.75384 | 14.11963 | 13.23054 |
| 17330203 | Cd86     | CD86 antigen                                                                       | 9.460392 | 9.623355 | 13.20388 | 7.87118  | 11.13161 | 8.29131  |
| 17471127 | Cd9      | CD9 antigen                                                                        | 59.18419 | 55.52325 | 71.92643 | 50.64683 | 50.0407  | 34.32434 |
| 17392572 | Cd93     | CD93 antigen                                                                       | 25.44253 | 21.9421  | 35.22774 | 24.96768 | 19.62866 | 23.29454 |
| 17330751 | Cd96     | CD96 antigen                                                                       | 3.655275 | 3.263862 | 5.023699 | 3.300764 | 2.973455 | 3.128996 |
| 17542180 | Cd99l2   | CD99 antigen-like 2                                                                | 29.04202 | 32.97521 | 37.38558 | 25.90592 | 33.47286 | 31.71932 |
| 17249282 | Clk4     | CDC like kinase 4                                                                  | 73.7796  | 79.89703 | 73.13398 | 74.64739 | 69.7219  | 74.71883 |
| 17409668 | Cdc14a   | CDC14 cell division cycle 14A                                                      | 7.357777 | 8.679067 | 9.411013 | 7.299613 | 7.850094 | 7.542224 |
| 17293675 | Cdc14b   | CDC14 cell division cycle 14B                                                      | 62.90008 | 70.5674  | 63.47559 | 57.95053 | 54.86256 | 72.96132 |
| 17499353 | Cdc16    | CDC16 cell division cycle 16                                                       | 36.44098 | 33.94836 | 32.03484 | 34.82159 | 33.13445 | 33.24833 |
| 17353488 | Cdc23    | CDC23 cell division cycle 23                                                       | 28.7502  | 26.13317 | 23.50882 | 26.13317 | 25.80949 | 28.76116 |
| 17407116 | Cks1b    | CDC28 protein kinase 1b                                                            | 26.06587 | 25.62713 | 26.78568 | 21.07309 | 33.39754 | 30.12    |
| 17503424 | Cks1brt  | CDC28 protein kinase 1b, retrogene                                                 | 5.818027 | 4.679226 | 6.02512  | 5.553049 | 7.367014 | 6.857297 |
| 17287330 | Cks2     | CDC28 protein kinase regulatory subunit 2                                          | 17.47221 | 20.07489 | 22.30105 | 26.60896 | 20.37263 | 24.36114 |
| 17547744 | Cks2     | CDC28 protein kinase regulatory subunit 2                                          | 45.60247 | 51.10031 | 61.20001 | 68.6839  | 54.31919 | 62.49202 |
| 17548955 | Cks2     | CDC28 protein kinase regulatory subunit 2                                          | 45.60247 | 51.10031 | 61.20001 | 68.6839  | 54.31919 | 62.49202 |
| 17220059 | Cdc42bpa | CDC42 binding protein kinase alpha                                                 | 49.62792 | 49.62792 | 49.62792 | 48.15454 | 46.72815 | 49.62792 |
| 17284065 | Cdc42bpb | CDC42 binding protein kinase beta                                                  | 108.8947 | 89.73818 | 108.8947 | 108.8947 | 101.9685 | 108.8947 |
| 17356754 | Cdc42bpg | CDC42 binding protein kinase gamma (DMPK-like)                                     | 31.81753 | 30.203   | 37.02275 | 31.27591 | 29.1051  | 35.82165 |

|          |               |                                                            |          |          |          |          |          |          |
|----------|---------------|------------------------------------------------------------|----------|----------|----------|----------|----------|----------|
| 17312774 | Cdc42ep1      | CDC42 effector protein (Rho GTPase binding) 1              | 20.91245 | 25.42913 | 31.62273 | 24.53042 | 25.95967 | 23.29454 |
| 17361850 | Cdc42ep2      | CDC42 effector protein (Rho GTPase binding) 2              | 8.013375 | 12.06344 | 13.07329 | 7.920162 | 10.50759 | 8.630774 |
| 17347435 | Cdc42ep3      | CDC42 effector protein (Rho GTPase binding) 3              | 16.01354 | 14.49748 | 13.76965 | 14.33828 | 14.66312 | 16.39564 |
| 17271622 | Cdc42ep4      | CDC42 effector protein (Rho GTPase binding) 4              | 24.88975 | 24.58728 | 23.87055 | 27.22972 | 18.52036 | 23.87055 |
| 17485706 | Cdc42ep5      | CDC42 effector protein (Rho GTPase binding) 5              | 20.15897 | 11.52504 | 17.61106 | 9.193792 | 9.115046 | 10.72644 |
| 17543290 | Arhgef9       | CDC42 guanine nucleotide exchange factor (GEF) 9           | 6.58398  | 6.979821 | 6.987227 | 6.131032 | 6.779975 | 6.950227 |
| 17400281 | Cdc42se1      | CDC42 small effector 1                                     | 30.10164 | 28.71176 | 28.75359 | 28.71176 | 22.40642 | 25.45293 |
| 17262836 | Cdc42se2      | CDC42 small effector 2                                     | 17.69562 | 11.22349 | 12.42712 | 12.35189 | 10.88976 | 11.87528 |
| 17223353 | Clk1          | CDC-like kinase 1                                          | 51.07375 | 73.38992 | 61.38014 | 58.65735 | 59.7638  | 65.56618 |
| 17399285 | Clk2          | CDC-like kinase 2                                          | 26.0386  | 36.33908 | 38.76385 | 43.16081 | 36.13162 | 29.99583 |
| 17527590 | Clk3          | CDC-like kinase 3                                          | 54.51382 | 50.84239 | 49.59319 | 45.99771 | 44.0027  | 41.5766  |
| 17241789 | Cisd1         | CDGSH iron sulfur domain 1                                 | 72.06815 | 81.68957 | 88.33725 | 87.67235 | 100.0613 | 113.0079 |
| 17410529 | Cisd2         | CDGSH iron sulfur domain 2                                 | 29.99437 | 28.03855 | 26.0074  | 31.71339 | 32.29547 | 35.44819 |
| 17255853 | Cisd3         | CDGSH iron sulfur domain 3                                 | 56.06311 | 87.16095 | 87.96087 | 91.32703 | 93.63656 | 103.651  |
| 17548228 | Cisd3b        | CDGSH iron sulfur domain 3B                                | 70.18155 | 83.81578 | 120.8413 | 90.00792 | 89.2933  | 95.39488 |
| 17262193 | Cdk2ap1       | CDK2 (cyclin-dependent kinase 2)-associated protein 1      | 19.8864  | 35.1865  | 27.042   | 42.62358 | 52.5362  | 32.04262 |
| 17452808 | Cdk2ap1       | CDK2 (cyclin-dependent kinase 2)-associated protein 1      | 6.703339 | 8.311795 | 7.921919 | 8.579003 | 8.919173 | 7.169189 |
| 17366081 | Cacul1        | CDK2 associated, cullin domain 1                           | 105.1912 | 101.6242 | 88.01942 | 91.43914 | 92.03942 | 99.63564 |
| 17548127 | Cacul1        | CDK2 associated, cullin domain 1                           | 79.12107 | 74.82923 | 65.46083 | 78.86427 | 65.97466 | 68.97444 |
| 17356099 | Cdk2ap2       | CDK2-associated protein 2                                  | 74.46962 | 61.81178 | 69.73737 | 64.80126 | 65.95819 | 66.41697 |
| 17348435 | Cables1       | CDK5 and Abl enzyme substrate 1                            | 12.1739  | 15.42512 | 16.62612 | 14.97786 | 16.73017 | 18.29985 |
| 17395601 | Cables2       | CDK5 and Abl enzyme substrate 2                            | 39.47753 | 26.67211 | 38.0251  | 41.63803 | 38.24502 | 29.69175 |
| 17393110 | Cdk5rap1      | CDK5 regulatory subunit associated protein 1               | 24.2518  | 26.82209 | 25.47694 | 24.41389 | 27.72201 | 21.21525 |
| 17291534 | Cdkal1        | CDK5 regulatory subunit associated protein 1-like 1        | 46.63464 | 41.78317 | 36.68911 | 33.8077  | 38.81978 | 37.56403 |
| 17426447 | Cdk5rap2      | CDK5 regulatory subunit associated protein 2               | 15.43464 | 13.53901 | 13.14589 | 12.57006 | 16.32284 | 14.72566 |
| 17268380 | Cdk5rap3      | CDK5 regulatory subunit associated protein 3               | 61.5608  | 51.32074 | 53.32499 | 56.05495 | 65.01407 | 56.59058 |
| 17369789 | Ciz1          | CDKN1A interacting zinc finger protein 1                   | 25.55954 | 23.62283 | 30.31647 | 25.92424 | 25.44182 | 30.99299 |
| 17509282 | Cdkn2aip      | CDKN2A interacting protein                                 | 23.42602 | 32.0655  | 29.82872 | 32.55642 | 26.31895 | 35.64308 |
| 17249375 | Cdkn2aipnl    | CDKN2A interacting protein N-terminal like                 | 55.05379 | 55.30431 | 57.46812 | 52.74966 | 52.74966 | 53.56468 |
| 17286052 | 9330162012Rik | cDNA RIKEN 9330162012 gene                                 | 14.09792 | 16.93106 | 13.59864 | 19.27301 | 23.17793 | 20.35089 |
| 17450950 | AB010352      | cDNA sequence AB010352                                     | 5.249645 | 3.620227 | 4.20927  | 4.313085 | 4.352065 | 3.179214 |
| 17515238 | AB124611      | cDNA sequence AB124611                                     | 20.68252 | 30.82694 | 25.35643 | 21.66493 | 21.66493 | 16.65773 |
| 17290199 | AF067061      | cDNA sequence AF067061                                     | 2.18339  | 3.191114 | 2.396601 | 2.894311 | 2.959842 | 2.57273  |
| 17296545 | AF067063      | cDNA sequence AF067063                                     | 3.280919 | 3.263862 | 3.729055 | 3.183668 | 3.068556 | 3.561364 |
| 17271733 | AF251705      | cDNA sequence AF251705                                     | 2.847528 | 5.978775 | 4.72682  | 4.759764 | 5.203672 | 3.623239 |
| 17507665 | AF366264      | cDNA sequence AF366264                                     | 2.948477 | 2.438274 | 2.690119 | 2.353308 | 2.960273 | 2.314964 |
| 17529625 | AF529169      | cDNA sequence AF529169                                     | 4.561853 | 4.888223 | 4.20927  | 3.502294 | 4.113254 | 4.980187 |
| 17285668 | AK157302      | cDNA sequence AK157302 [Source:MGI Symbol;Acc:MGI:3574096] | 61.78009 | 71.16125 | 65.04427 | 84.07471 | 69.25278 | 65.89102 |
| 17527308 | AY074887      | cDNA sequence AY074887                                     | 6.910547 | 6.468315 | 5.617429 | 6.628581 | 5.655443 | 5.168731 |
| 17299627 | AY358078      | cDNA sequence AY358078                                     | 15.74684 | 30.16158 | 32.55664 | 27.84507 | 21.78827 | 23.56674 |
| 17469249 | AY512915      | cDNA sequence AY512915                                     | 3.604677 | 3.836684 | 4.060845 | 3.36984  | 4.587824 | 3.687492 |
| 17509025 | AY512931      | cDNA sequence AY512931                                     | 2.74398  | 3.041156 | 2.98626  | 3.703322 | 3.042991 | 3.091506 |
| 17394916 | AY702102      | cDNA sequence AY702102                                     | 2.742212 | 2.456867 | 2.797969 | 2.640589 | 2.076408 | 2.692283 |
| 17338517 | AY702103      | cDNA sequence AY702103                                     | 3.459827 | 2.67402  | 2.67402  | 2.560881 | 2.812825 | 2.438054 |
| 17507933 | AY761184      | cDNA sequence AY761184                                     | 4.807211 | 4.352065 | 3.670687 | 4.704072 | 4.352065 | 3.725205 |
| 17507894 | AY761185      | cDNA sequence AY761185                                     | 2.618717 | 2.406006 | 2.406006 | 2.406006 | 2.287022 | 2.852269 |
| 17333630 | BC002059      | cDNA sequence BC002059                                     | 7.175105 | 10.01548 | 11.95084 | 11.4417  | 6.662021 | 11.39098 |
| 17227872 | BC003331      | cDNA sequence BC003331                                     | 89.63374 | 75.47359 | 76.34491 | 76.34491 | 72.15063 | 71.23479 |
| 17334599 | BC003965      | cDNA sequence BC003965                                     | 23.34594 | 27.64066 | 28.09127 | 26.07599 | 26.43835 | 28.05119 |
| 17335493 | BC004004      | cDNA sequence BC004004                                     | 228.6647 | 220.8985 | 201.6081 | 200.4571 | 221.4811 | 213.787  |
| 17309374 | BC005512      | cDNA sequence BC005512                                     | 4.01461  | 4.012969 | 3.287521 | 2.76853  | 4.32479  | 3.789953 |
| 17285998 | BC005537      | cDNA sequence BC005537                                     | 354.7896 | 377.9601 | 418.6788 | 361.5923 | 378.3821 | 360.6886 |
| 17439861 | BC005561      | cDNA sequence BC005561                                     | 31.96497 | 39.10849 | 28.48163 | 40.21523 | 28.89644 | 33.60374 |
| 17383733 | BC005624      | cDNA sequence BC005624                                     | 41.62793 | 43.48392 | 50.7206  | 42.00299 | 34.33314 | 44.09521 |
| 17271539 | BC006965      | cDNA sequence BC006965                                     | 4.09641  | 4.185355 | 4.184572 | 4.062929 | 4.362484 | 4.392341 |
| 17388798 | BC016548      | cDNA sequence BC016548                                     | 2.865149 | 2.659804 | 2.495312 | 2.526745 | 3.982957 | 2.884278 |
| 17496867 | BC017158      | cDNA sequence BC017158                                     | 17.62865 | 15.03528 | 18.88436 | 16.33597 | 12.66768 | 14.55568 |
| 17273498 | BC017643      | cDNA sequence BC017643                                     | 15.86032 | 14.26878 | 16.45792 | 13.93673 | 14.16099 | 15.43582 |
| 17258644 | BC018473      | cDNA sequence BC018473                                     | 3.535122 | 3.571599 | 3.286336 | 3.347212 | 2.75897  | 3.263613 |
| 17239070 | BC020402      | cDNA sequence BC020402                                     | 9.525864 | 7.826406 | 13.22825 | 8.645084 | 4.124416 | 9.760263 |
| 17361090 | BC021614      | cDNA sequence BC021614                                     | 49.06866 | 73.72285 | 102.3608 | 72.14612 | 78.08264 | 71.75712 |
| 17240309 | BC021785      | cDNA sequence BC021785                                     | 8.598589 | 6.014855 | 5.305909 | 6.605098 | 6.454431 | 7.169189 |
| 17506904 | BC021891      | cDNA sequence BC021891                                     | 11.75791 | 11.37213 | 11.55472 | 13.33532 | 12.28197 | 15.14133 |
| 17279417 | BC022687      | cDNA sequence BC022687                                     | 6.180699 | 10.95828 | 8.265832 | 8.265832 | 5.506059 | 10.29392 |
| 17539682 | BC022960      | cDNA sequence BC022960                                     | 3.355552 | 2.769451 | 2.835907 | 2.654702 | 3.209614 | 3.167446 |
| 17350932 | BC023105      | cDNA sequence BC023105                                     | 25.54254 | 24.10215 | 19.49537 | 22.24316 | 25.66642 | 21.9067  |
| 17548055 | BC023105      | cDNA sequence BC023105                                     | 56.00835 | 30.06765 | 43.4303  | 34.66721 | 38.72759 | 40.21021 |
| 17484667 | BC023486      | cDNA sequence BC023486                                     | 244.6559 | 497.5611 | 457.6053 | 493.2824 | 496.6962 | 527.6948 |
| 17337373 | BC023719      | cDNA sequence BC023719 [Source:MGI Symbol;Acc:MGI:3574836] | 3.476053 | 3.883991 | 3.779538 | 4.20927  | 3.149276 | 4.524286 |
| 17542167 | BC023829      | cDNA sequence BC023829                                     | 38.35386 | 35.56608 | 35.71603 | 28.01019 | 33.42695 | 28.50889 |
| 17318326 | BC024139      | cDNA sequence BC024139                                     | 8.951193 | 10.17425 | 11.0904  | 9.996479 | 10.17425 | 10.77309 |
| 17475523 | BC024978      | cDNA sequence BC024978                                     | 23.51517 | 19.74547 | 18.45462 | 18.90112 | 18.84317 | 14.8138  |
| 17312223 | BC025446      | cDNA sequence BC025446                                     | 169.2157 | 157.6302 | 136.5599 | 198.3425 | 200.2946 | 163.9611 |
| 17218465 | BC026585      | cDNA sequence BC026585                                     | 49.14423 | 47.54989 | 47.36764 | 47.84247 | 42.84782 | 47.91515 |
| 17347077 | BC027072      | cDNA sequence BC027072                                     | 4.336978 | 5.877041 | 5.433192 | 5.549008 | 5.148706 | 5.455911 |
| 17407947 | BC028528      | cDNA sequence BC028528                                     | 6.235477 | 6.86919  | 5.576926 | 6.943774 | 7.952729 | 6.280024 |
| 17334200 | BC028777      | cDNA sequence BC028777                                     | 8.740222 | 9.873626 | 8.509415 | 11.97264 | 10.92105 | 10.19627 |
| 17382574 | BC029214      | cDNA sequence BC029214                                     | 11.24366 | 9.797475 | 7.056242 | 13.12149 | 10.25205 | 8.899905 |
| 17393353 | BC029722      | cDNA sequence BC029722                                     | 19.28985 | 20.22685 | 18.57628 | 17.32316 | 14.11943 | 14.01529 |
| 17482503 | BC030336      | cDNA sequence BC030336                                     | 39.41028 | 39.18148 | 39.57973 | 36.02259 | 35.31551 | 43.06787 |
| 17253555 | BC030499      | cDNA sequence BC030499                                     | 4.881552 | 4.414194 | 4.165703 | 6.25045  | 4.882703 | 5.84596  |
| 17501317 | BC030500      | cDNA sequence BC030500                                     | 4.392493 | 4.910977 | 4.392493 | 4.282253 | 3.482902 | 4.449675 |
| 17256910 | BC030867      | cDNA sequence BC030867                                     | 6.55661  | 6.937424 | 7.754319 | 7.776063 | 6.834094 | 7.854449 |
| 17509682 | BC030870      | cDNA sequence BC030870                                     | 3.703322 | 3.703322 | 3.528023 | 4.035535 | 3.831077 | 3.834398 |

|          |          |                                                                                        |          |          |          |          |          |          |
|----------|----------|----------------------------------------------------------------------------------------|----------|----------|----------|----------|----------|----------|
| 17351837 | BC031181 | cDNA sequence BC031181                                                                 | 76.9191  | 64.54171 | 62.53361 | 61.14362 | 56.83036 | 73.1426  |
| 17330321 | BC031361 | cDNA sequence BC031361                                                                 | 2.769758 | 3.883991 | 3.339703 | 3.339703 | 3.216073 | 2.774081 |
| 17228362 | BC034090 | cDNA sequence BC034090                                                                 | 2.827055 | 3.54506  | 3.54506  | 3.229677 | 3.54506  | 3.456088 |
| 17548985 | BC034090 | cDNA sequence BC034090                                                                 | 4.1775   | 5.6556   | 4.074943 | 5.190703 | 3.729055 | 4.247253 |
| 17471473 | BC035044 | cDNA sequence BC035044                                                                 | 3.573753 | 3.263862 | 3.242845 | 3.263862 | 3.263862 | 3.722727 |
| 17224724 | BC035947 | cDNA sequence BC035947                                                                 | 8.5915   | 9.984706 | 11.17893 | 10.12725 | 12.51937 | 9.912507 |
| 17315677 | BC037032 | cDNA Sequence BC037032                                                                 | 4.278574 | 4.280858 | 3.835461 | 4.730819 | 4.095955 | 3.421147 |
| 17454283 | BC037034 | cDNA sequence BC037034                                                                 | 26.01461 | 27.53911 | 29.63212 | 26.70319 | 27.70549 | 27.70549 |
| 17359606 | BC037704 | cDNA sequence BC037704                                                                 | 7.18237  | 7.688062 | 5.472993 | 7.499165 | 5.721328 | 5.960817 |
| 17377170 | BC039771 | cDNA sequence BC039771                                                                 | 14.21163 | 12.441   | 12.97174 | 17.65898 | 17.97949 | 14.8873  |
| 17433537 | BC039966 | cDNA sequence BC039966                                                                 | 7.588528 | 5.8602   | 7.098037 | 6.047002 | 5.675471 | 4.556418 |
| 17529803 | BC043934 | cDNA sequence BC043934                                                                 | 2.770814 | 2.6283   | 2.392419 | 3.404517 | 2.951647 | 2.514846 |
| 17548767 | BC043934 | cDNA sequence BC043934 [Source:MGI Symbol;Acc:MGI:2679715]                             | 3.051334 | 3.811186 | 4.161028 | 3.889973 | 4.735281 | 3.497563 |
| 17478910 | BC046251 | cDNA sequence BC046251                                                                 | 4.86409  | 6.12186  | 5.499308 | 5.332973 | 5.238813 | 5.579864 |
| 17379713 | BC046401 | cDNA sequence BC046401                                                                 | 4.01461  | 4.233967 | 3.608052 | 4.058875 | 4.01461  | 2.832488 |
| 17237751 | BC048403 | cDNA sequence BC048403                                                                 | 20.52912 | 16.93235 | 16.35341 | 15.31624 | 15.34961 | 16.11341 |
| 17322418 | BC048502 | cDNA sequence BC048502                                                                 | 2.3059   | 2.1492   | 2.401124 | 1.946632 | 2.765499 | 2.381796 |
| 17288354 | BC048507 | cDNA sequence BC048507                                                                 | 22.54741 | 16.07838 | 16.01387 | 16.75477 | 19.89522 | 21.46434 |
| 17471394 | BC048546 | cDNA sequence BC048546                                                                 | 4.589796 | 4.833204 | 5.617429 | 4.833204 | 5.91363  | 4.86753  |
| 17521716 | BC048562 | cDNA sequence BC048562                                                                 | 3.435428 | 2.801229 | 3.203969 | 2.999475 | 2.804551 | 3.013437 |
| 17373996 | BC048594 | cDNA sequence BC048594                                                                 | 2.393646 | 3.034944 | 2.556961 | 2.988269 | 2.732081 | 2.327192 |
| 17316428 | BC048602 | cDNA sequence BC048602                                                                 | 7.744167 | 10.7443  | 7.314453 | 7.814535 | 9.681429 | 8.389472 |
| 17356616 | BC048609 | cDNA sequence BC048609                                                                 | 7.08894  | 7.873854 | 7.414349 | 7.446074 | 8.462536 | 7.972156 |
| 17506329 | BC048644 | cDNA sequence BC048644                                                                 | 3.061715 | 3.742286 | 3.556948 | 4.486965 | 3.648542 | 3.094572 |
| 17460775 | BC048671 | cDNA sequence BC048671                                                                 | 4.250198 | 3.703322 | 3.703322 | 3.274989 | 4.766598 | 3.666161 |
| 17492817 | BC048679 | cDNA sequence BC048679                                                                 | 9.107784 | 9.485212 | 7.860167 | 8.441504 | 10.50162 | 10.18067 |
| 17516752 | BC049352 | cDNA sequence BC049352                                                                 | 4.165299 | 4.072402 | 3.274149 | 3.60178  | 3.622737 | 5.443558 |
| 17540460 | BC049702 | cDNA sequence BC049702                                                                 | 3.536372 | 4.432283 | 4.623258 | 3.750804 | 3.231312 | 3.74335  |
| 17463837 | BC049715 | cDNA sequence BC049715                                                                 | 4.081983 | 4.667209 | 4.20927  | 3.749349 | 3.482661 | 5.037682 |
| 17475070 | BC049730 | cDNA sequence BC049730                                                                 | 2.274123 | 2.603135 | 2.208734 | 2.533058 | 2.921319 | 2.442265 |
| 17262471 | BC049762 | cDNA sequence BC049762                                                                 | 8.424027 | 10.66218 | 8.125407 | 9.372604 | 9.089557 | 9.239149 |
| 17528388 | BC050972 | cDNA sequence BC050972 [Source:MGI Symbol;Acc:MGI:3039596]                             | 7.424223 | 4.854774 | 7.083979 | 7.165215 | 8.15322  | 6.283159 |
| 17494917 | BC051019 | cDNA sequence BC051019                                                                 | 5.011769 | 5.530385 | 5.486933 | 5.515455 | 5.897649 | 6.266761 |
| 17438706 | BC051076 | cDNA sequence BC051076                                                                 | 2.418462 | 2.306524 | 2.488317 | 2.952117 | 2.207265 | 2.542962 |
| 17451862 | BC051077 | cDNA sequence BC051077                                                                 | 3.768264 | 4.198052 | 3.542677 | 4.265308 | 3.543954 | 4.428843 |
| 17336536 | BC051142 | cDNA sequence BC051142                                                                 | 3.416857 | 3.310364 | 3.899394 | 4.006632 | 4.332981 | 3.86546  |
| 17343668 | BC051226 | cDNA sequence BC051226                                                                 | 13.62392 | 17.63488 | 16.10269 | 12.14643 | 16.04242 | 16.04242 |
| 17343762 | BC051537 | cDNA sequence BC051537                                                                 | 4.260374 | 4.666432 | 4.804246 | 6.270715 | 5.851311 | 5.147136 |
| 17380963 | BC051628 | cDNA sequence BC051628                                                                 | 5.261521 | 5.3493   | 7.467938 | 5.45958  | 7.02457  | 5.900511 |
| 17293318 | BC051665 | cDNA sequence BC051665                                                                 | 4.053533 | 3.103121 | 2.847232 | 4.009799 | 2.454876 | 3.823516 |
| 17374406 | BC052040 | cDNA sequence BC052040                                                                 | 15.74083 | 18.64491 | 13.38226 | 17.04847 | 15.37058 | 17.04847 |
| 17288030 | BC052688 | cDNA sequence BC052688                                                                 | 2.621205 | 2.239691 | 3.009972 | 2.304206 | 3.263862 | 2.262692 |
| 17248839 | BC053393 | cDNA sequence BC053393                                                                 | 3.462322 | 2.588776 | 2.79295  | 3.009972 | 3.112082 | 3.009972 |
| 17229128 | BC055324 | cDNA sequence BC055324                                                                 | 4.801649 | 4.801649 | 4.622746 | 4.801649 | 5.289605 | 4.801649 |
| 17223300 | BC055402 | cDNA sequence BC055402                                                                 | 6.559974 | 5.532916 | 5.532916 | 6.017315 | 5.532916 | 6.570622 |
| 17536247 | BC061195 | cDNA sequence BC061195                                                                 | 6.11465  | 5.162608 | 5.579593 | 5.230939 | 6.194638 | 5.640488 |
| 17299145 | BC061237 | cDNA sequence BC061237                                                                 | 2.685071 | 2.451424 | 3.152421 | 2.450897 | 2.584527 | 2.971662 |
| 17463478 | BC064078 | cDNA sequence BC064078                                                                 | 15.74236 | 16.95948 | 15.9016  | 12.88866 | 12.74068 | 13.64433 |
| 17537942 | BC065397 | cDNA sequence BC065397                                                                 | 8.087815 | 7.337456 | 7.337456 | 7.305586 | 6.132307 | 7.650426 |
| 17528746 | BC065403 | cDNA sequence BC065403                                                                 | 4.431576 | 4.431576 | 4.591864 | 4.801649 | 4.431576 | 4.433973 |
| 17290016 | BC067074 | cDNA sequence BC067074                                                                 | 3.339703 | 3.339703 | 3.098672 | 3.098887 | 2.763985 | 3.641745 |
| 17273812 | BC068281 | cDNA sequence BC068281                                                                 | 13.45938 | 13.45938 | 12.53708 | 14.21212 | 15.38231 | 13.45938 |
| 17421215 | BC080695 | cDNA sequence BC080695                                                                 | 11.51769 | 8.139048 | 8.116738 | 6.932905 | 8.949518 | 10.65339 |
| 17449862 | BC080696 | cDNA sequence BC080696                                                                 | 4.13624  | 3.536053 | 3.536053 | 3.437477 | 3.803137 | 4.106303 |
| 17455643 | BC080696 | cDNA sequence BC080696                                                                 | 4.878981 | 3.735186 | 4.276736 | 3.721386 | 4.629223 | 4.20927  |
| 17488370 | BC089491 | cDNA sequence BC089491                                                                 | 3.803823 | 2.947312 | 4.064957 | 3.798132 | 3.874338 | 4.08705  |
| 17238191 | BC089597 | cDNA sequence BC089597                                                                 | 60.66237 | 149.4853 | 141.8606 | 118.517  | 163.6115 | 137.0359 |
| 17230014 | BC094916 | cDNA sequence BC094916                                                                 | 3.462322 | 2.537557 | 2.839329 | 3.157494 | 2.977951 | 3.787485 |
| 17272780 | BC100451 | cDNA sequence BC100451                                                                 | 4.940373 | 5.704221 | 4.940373 | 5.823514 | 9.835443 | 5.56106  |
| 17330168 | BC100530 | cDNA sequence BC100530                                                                 | 2.145286 | 1.834784 | 1.881926 | 2.503784 | 2.596341 | 1.991341 |
| 17547678 | BC106175 | cDNA sequence BC106175                                                                 | 4.420072 | 4.301113 | 3.700422 | 5.008366 | 3.444059 | 4.384766 |
| 17329395 | BC106179 | cDNA sequence BC106179                                                                 | 5.166331 | 7.30822  | 5.562371 | 6.499866 | 6.030928 | 6.443569 |
| 17408054 | BC107364 | cDNA sequence BC107364                                                                 | 5.57824  | 4.682925 | 5.009199 | 5.331236 | 4.479849 | 4.687114 |
| 17330162 | BC117090 | cDNA sequence BC117090                                                                 | 4.780296 | 4.994326 | 5.205945 | 6.953021 | 5.8905   | 4.014193 |
| 17290205 | BC147527 | cDNA sequence BC147527                                                                 | 4.821928 | 3.883991 | 3.801661 | 3.514574 | 3.760671 | 3.853288 |
| 17337963 | BE949265 | cDNA sequence BE949265                                                                 | 3.042548 | 2.945148 | 3.201238 | 3.465492 | 2.799502 | 3.229252 |
| 17430237 | CK137956 | cDNA sequence CK137956                                                                 | 9.367603 | 8.623001 | 7.266698 | 12.78154 | 11.67297 | 11.14558 |
| 17314242 | CN725425 | cDNA sequence CN725425                                                                 | 2.676968 | 2.740027 | 2.625842 | 2.761094 | 2.882259 | 3.162598 |
| 17449649 | U90926   | cDNA sequence U90926                                                                   | 3.067961 | 3.21507  | 3.173665 | 2.963989 | 3.251961 | 2.936586 |
| 17330654 | BC016579 | cDNA sequence, BC016579                                                                | 3.456088 | 3.240441 | 3.806513 | 3.545134 | 3.294387 | 3.832989 |
| 17376563 | Cds2     | CDP-diacylglycerol synthase (phosphatidate cytidyltransferase) 2                       | 102.134  | 124.9338 | 124.1939 | 116.7485 | 110.7628 | 119.2992 |
| 17439646 | Cds1     | CDP-diacylglycerol synthase 1                                                          | 3.904425 | 3.89437  | 3.89437  | 4.177153 | 3.909055 | 4.621048 |
| 17483220 | Cdipt    | CDP-diacylglycerol--inositol 3-phosphatidyltransferase (phosphatidylinositol synthase) | 94.51491 | 104.0765 | 124.8559 | 106.2898 | 91.3131  | 86.48991 |
| 17516960 | Cadm1    | cell adhesion molecule 1                                                               | 39.97067 | 41.48765 | 48.82676 | 38.98318 | 38.964   | 37.98979 |
| 17331447 | Cadm2    | cell adhesion molecule 2                                                               | 3.511458 | 3.274989 | 3.781346 | 3.710285 | 4.135094 | 3.274989 |
| 17229988 | Cadm3    | cell adhesion molecule 3                                                               | 17.49257 | 23.75007 | 17.64002 | 27.05719 | 10.84825 | 19.53555 |
| 17474983 | Cadm4    | cell adhesion molecule 4                                                               | 11.7282  | 11.23758 | 11.80119 | 11.17041 | 11.71618 | 10.49238 |
| 17461205 | Chl1     | cell adhesion molecule with homology to L1CAM                                          | 2.96477  | 2.624586 | 2.829388 | 3.450654 | 3.131405 | 3.135727 |
| 17515921 | Cdon     | cell adhesion molecule-related/down-regulated by oncogenes                             | 5.811618 | 8.833346 | 6.171709 | 6.943774 | 6.171709 | 5.589542 |
| 17515950 | Cdon     | cell adhesion molecule-related/down-regulated by oncogenes                             | 2.932112 | 2.558414 | 2.642823 | 2.454978 | 2.696784 | 3.060654 |
| 17308209 | Ccar2    | cell cycle activator and apoptosis regulator 2                                         | 32.51785 | 32.51785 | 32.50793 | 31.51158 | 31.24038 | 33.7494  |
| 17388854 | Caprin1  | cell cycle associated protein 1                                                        | 71.56886 | 70.12563 | 62.39896 | 75.83069 | 52.31035 | 67.33245 |
| 17497895 | Cend1    | cell cycle exit and neuronal differentiation 1                                         | 11.97937 | 9.219446 | 11.81346 | 12.41541 | 9.844146 | 13.18632 |
| 17519259 | Ccp1     | cell cycle progression 1                                                               | 77.42084 | 86.12081 | 86.72223 | 80.02673 | 73.50447 | 72.24321 |

|          |           |                                                                                  |          |          |          |          |          |          |
|----------|-----------|----------------------------------------------------------------------------------|----------|----------|----------|----------|----------|----------|
| 17528775 | Ccpg1os   | cell cycle progression 1, opposite strand                                        | 80.69067 | 89.41717 | 98.20877 | 98.24486 | 90.50151 | 88.27971 |
| 17327815 | Cdip1     | cell death inducing Trp53 target 1                                               | 30.52417 | 44.92697 | 36.44629 | 41.88814 | 42.03182 | 38.75445 |
| 17469754 | Cidec     | cell death-inducing DFFA-like effector c                                         | 35.7143  | 79.67968 | 127.7607 | 62.91927 | 40.46773 | 49.4264  |
| 17351457 | Cidea     | cell death-inducing DNA fragmentation factor, alpha subunit-like effector A      | 19.36366 | 16.43273 | 15.51079 | 8.51685  | 14.83836 | 17.69684 |
| 17306867 | Cideb     | cell death-inducing DNA fragmentation factor, alpha subunit-like effector B      | 522.53   | 571.6705 | 699.6017 | 579.9682 | 526.2119 | 581.3568 |
| 17381376 | Cdc123    | cell division cycle 123                                                          | 114.1621 | 111.0365 | 109.2849 | 109.4881 | 110.2955 | 113.4537 |
| 17429177 | Cdc20     | cell division cycle 20                                                           | 15.83637 | 15.82364 | 19.07604 | 15.89807 | 13.96748 | 16.87798 |
| 17289986 | Cdc20b    | cell division cycle 20B                                                          | 4.352065 | 4.577024 | 4.352065 | 4.446315 | 4.352065 | 4.730524 |
| 17522235 | Cdc25a    | cell division cycle 25A                                                          | 5.831997 | 5.718552 | 4.33184  | 5.533913 | 5.591479 | 4.47172  |
| 17376446 | Cdc25b    | cell division cycle 25B                                                          | 6.456579 | 4.800784 | 5.641896 | 5.239757 | 6.112193 | 5.291035 |
| 17353520 | Cdc25c    | cell division cycle 25C                                                          | 4.591514 | 3.902314 | 3.703322 | 3.491411 | 4.337218 | 3.703322 |
| 17426166 | Cdc26     | cell division cycle 26                                                           | 49.90284 | 39.81803 | 42.92719 | 41.33036 | 35.38951 | 47.37552 |
| 17270648 | Cdc27     | cell division cycle 27                                                           | 86.68978 | 75.43123 | 82.65499 | 78.69009 | 74.79189 | 65.3996  |
| 17234910 | Cdc34     | cell division cycle 34                                                           | 60.31312 | 48.7206  | 42.72386 | 40.1303  | 38.63777 | 48.45656 |
| 17255254 | Cdc34-ps  | cell division cycle 34 homolog, pseudogene (S. cerevisiae)                       | 3.152333 | 2.863918 | 3.046431 | 2.965078 | 2.646967 | 2.953407 |
| 17524648 | Cdc37     | cell division cycle 37                                                           | 72.84611 | 77.85188 | 99.4018  | 89.52136 | 90.90325 | 83.41067 |
| 17358486 | Cdc37l1   | cell division cycle 37-like 1                                                    | 42.85525 | 41.93114 | 35.21895 | 44.28327 | 31.54851 | 40.62906 |
| 17240379 | Cdc40     | cell division cycle 40                                                           | 71.68304 | 71.21701 | 71.43306 | 67.62431 | 71.43306 | 72.47442 |
| 17341672 | Cdc42     | cell division cycle 42                                                           | 386.9303 | 434.9302 | 427.6984 | 366.6272 | 343.4485 | 379.4142 |
| 17328978 | Cdc45     | cell division cycle 45                                                           | 6.992896 | 8.855907 | 6.992896 | 7.030757 | 6.870714 | 7.041535 |
| 17345152 | Cdc5l     | cell division cycle 5-like (S. pombe)                                            | 20.8583  | 19.62866 | 19.46756 | 19.97578 | 29.7779  | 21.1549  |
| 17256225 | Cdc6      | cell division cycle 6                                                            | 6.356577 | 6.221446 | 4.835517 | 5.461094 | 7.935109 | 6.914285 |
| 17439978 | Cdc7      | cell division cycle 7 (S. cerevisiae)                                            | 3.478222 | 3.84563  | 4.053758 | 4.726689 | 3.476053 | 3.977219 |
| 17227729 | Cdc73     | cell division cycle 73, Paf1/RNA polymerase II complex component                 | 48.81017 | 47.45276 | 44.68287 | 46.0794  | 46.0794  | 44.9195  |
| 17241483 | Ccar1     | cell division cycle and apoptosis regulator 1                                    | 67.25595 | 81.66862 | 74.20888 | 73.61256 | 78.97751 | 68.91566 |
| 17307969 | Cdca2     | cell division cycle associated 2                                                 | 5.826583 | 6.219592 | 5.904439 | 5.686851 | 5.686851 | 6.214723 |
| 17462958 | Cdca3     | cell division cycle associated 3                                                 | 8.154407 | 6.3128   | 7.708018 | 6.563112 | 7.231225 | 6.637362 |
| 17284243 | Cdca4     | cell division cycle associated 4                                                 | 16.03631 | 17.77207 | 14.51538 | 16.8183  | 17.34839 | 19.27795 |
| 17356622 | Cdca5     | cell division cycle associated 5                                                 | 7.56972  | 7.522593 | 6.977257 | 6.943774 | 6.868734 | 6.923541 |
| 17371941 | Cdca7     | cell division cycle associated 7                                                 | 5.048273 | 5.897772 | 6.183827 | 5.278398 | 5.680154 | 5.721764 |
| 17279701 | Cdca7l    | cell division cycle associated 7 like                                            | 5.338965 | 5.153562 | 5.338965 | 5.217722 | 6.282244 | 5.715778 |
| 17429896 | Cdca8     | cell division cycle associated 8                                                 | 4.498612 | 4.75429  | 4.498612 | 5.1481   | 4.038893 | 4.410891 |
| 17446767 | Cgref1    | cell growth regulator with EF hand domain 1                                      | 11.62155 | 11.50277 | 11.41564 | 8.759995 | 12.5791  | 7.988585 |
| 17299279 | Cgrrf1    | cell growth regulator with ring finger domain 1                                  | 54.02143 | 43.47126 | 36.83001 | 54.07163 | 50.94752 | 50.90128 |
| 17492947 | Cemip     | cell migration inducing protein, hyaluronan binding                              | 4.603943 | 4.896836 | 5.464956 | 4.851665 | 4.494934 | 5.983833 |
| 17438113 | Cwh43     | cell wall biogenesis 43 C-terminal homolog (S. cerevisiae)                       | 4.536878 | 4.63452  | 4.50857  | 4.801649 | 4.708149 | 5.387702 |
| 17468690 | Cnbp      | cellular nucleic acid binding protein                                            | 392.8351 | 360.3263 | 334.416  | 358.2915 | 334.0106 | 359.117  |
| 17219005 | Creg1     | cellular repressor of E1A-stimulated genes 1                                     | 1194.888 | 1245.656 | 1107.53  | 1000.621 | 830.4618 | 967.2332 |
| 17222568 | Creg2     | cellular repressor of E1A-stimulated genes 2                                     | 7.289147 | 7.750074 | 7.698994 | 7.698994 | 9.158428 | 7.892597 |
| 17517416 | Crabp1    | cellular retinoic acid binding protein I                                         | 4.809244 | 3.621733 | 4.809244 | 4.809244 | 4.364571 | 4.965882 |
| 17398895 | Crabp2    | cellular retinoic acid binding protein II                                        | 6.446294 | 8.303042 | 5.274119 | 7.901738 | 5.635877 | 7.003034 |
| 17415076 | Cntln     | centlein, centrosomal protein                                                    | 6.436204 | 5.767276 | 6.538728 | 6.187086 | 8.32246  | 6.9105   |
| 17352593 | Cetn1     | centrin 1                                                                        | 2.942658 | 2.601241 | 2.830467 | 2.841869 | 2.616884 | 2.788521 |
| 17542239 | Cetn2     | centrin 2                                                                        | 7.313439 | 7.210653 | 8.110608 | 8.864873 | 7.935109 | 9.27084  |
| 17288908 | Cetn3     | centrin 3                                                                        | 24.0963  | 24.53552 | 19.95862 | 23.21025 | 30.0491  | 25.75552 |
| 17404896 | Cetn4     | centrin 4                                                                        | 7.13523  | 6.176331 | 7.511286 | 7.756523 | 6.771568 | 7.808362 |
| 17482160 | Ccp110    | centriolar coiled coil protein 110                                               | 6.725679 | 8.937678 | 7.56652  | 5.564993 | 8.320441 | 8.614219 |
| 17513986 | Ccsap     | centriole, cilia and spindle associated protein                                  | 2.669279 | 2.788695 | 2.898487 | 2.856879 | 3.125182 | 3.052603 |
| 17513989 | Ccsap     | centriole, cilia and spindle associated protein                                  | 9.107026 | 8.766676 | 9.459802 | 9.181055 | 7.366095 | 9.477851 |
| 17370145 | Cntrl     | centriolin                                                                       | 17.78452 | 18.36555 | 17.43519 | 17.36523 | 18.9402  | 19.57798 |
| 17264562 | Cntrob    | centrobin, centrosomal BRCA2 interacting protein                                 | 15.77557 | 17.69684 | 17.72029 | 19.00056 | 17.69684 | 19.09893 |
| 17251604 | Cntrobos  | centrobin, centrosomal BRCA2 interacting protein, opposite strand [Source:MGI Sy | 9.865417 | 9.620154 | 10.1335  | 11.06192 | 11.38482 | 9.310251 |
| 17435825 | Cenpa     | centromere protein A                                                             | 6.794371 | 6.863193 | 6.976532 | 6.501759 | 7.469698 | 7.286217 |
| 17391883 | Cenpb     | centromere protein B                                                             | 12.59955 | 19.10357 | 23.40622 | 18.28235 | 20.9197  | 18.70355 |
| 17449155 | Cenpc1    | centromere protein C1                                                            | 7.073724 | 6.397685 | 5.930032 | 6.565159 | 6.664146 | 6.565159 |
| 17402797 | Cenpe     | centromere protein E                                                             | 5.321083 | 5.155885 | 6.237509 | 5.434548 | 5.09238  | 5.06264  |
| 17230918 | Cenpf     | centromere protein F                                                             | 4.301411 | 6.180228 | 5.267287 | 4.851867 | 5.32101  | 5.028576 |
| 17295745 | Cenph     | centromere protein H                                                             | 2.998249 | 3.036038 | 3.290325 | 3.290325 | 3.033998 | 3.857457 |
| 17537648 | Cenpi     | centromere protein I                                                             | 4.757785 | 3.69335  | 3.258053 | 4.813946 | 3.832033 | 3.866987 |
| 17307046 | Cenpj     | centromere protein J                                                             | 9.062757 | 10.28087 | 12.19223 | 11.47514 | 11.0954  | 13.75029 |
| 17289584 | Cenpk     | centromere protein K                                                             | 2.987399 | 3.670203 | 4.194154 | 2.754098 | 3.62741  | 3.313188 |
| 17218682 | Cenpl     | centromere protein L                                                             | 5.878712 | 6.333531 | 6.920278 | 7.005607 | 7.035437 | 7.478091 |
| 17319596 | Cenpm     | centromere protein M                                                             | 28.17922 | 28.43331 | 43.16111 | 36.34462 | 43.92925 | 31.5166  |
| 17505913 | Cenpn     | centromere protein N                                                             | 6.492437 | 6.35455  | 6.081385 | 6.512313 | 6.123175 | 6.425862 |
| 17279789 | Cenpo     | centromere protein O                                                             | 11.21401 | 12.2624  | 12.2624  | 9.759519 | 12.66364 | 13.50873 |
| 17292477 | Cenpp     | centromere protein P                                                             | 3.683992 | 3.572317 | 3.416123 | 3.546362 | 3.363842 | 3.642528 |
| 17344990 | Cenpq     | centromere protein Q                                                             | 6.784394 | 5.449712 | 4.197354 | 4.347542 | 6.004483 | 5.730853 |
| 17512529 | Cenpt     | centromere protein T                                                             | 6.16987  | 9.348468 | 10.9747  | 10.47799 | 8.685386 | 9.322972 |
| 17501025 | Cenpu     | centromere protein U                                                             | 4.572712 | 4.410188 | 3.899367 | 3.482178 | 4.352065 | 3.213087 |
| 17264021 | Cenpv     | centromere protein V                                                             | 55.97458 | 51.55141 | 58.76601 | 67.13951 | 54.59512 | 60.97771 |
| 17240022 | Cenpw     | centromere protein W                                                             | 3.003178 | 2.582664 | 2.723685 | 2.953407 | 2.579283 | 3.867497 |
| 17422276 | Cep104    | centrosomal protein 104                                                          | 21.83499 | 23.29454 | 17.41393 | 23.29454 | 23.29454 | 21.07791 |
| 17257760 | Cep112    | centrosomal protein 112                                                          | 7.095085 | 6.357899 | 7.31638  | 6.794889 | 6.794889 | 6.794889 |
| 17271194 | Cep112os1 | centrosomal protein 112, opposite strand 1 [Source:MGI Symbol;Acc:MGI:3652256]   | 3.668804 | 3.813538 | 3.921702 | 3.479307 | 4.757785 | 3.632317 |
| 17257798 | Cep112os2 | centrosomal protein 112, opposite strand 2                                       | 3.503435 | 3.523966 | 3.087716 | 3.503435 | 3.104003 | 3.503435 |
| 17354386 | Cep120    | centrosomal protein 120                                                          | 29.07687 | 33.38759 | 31.14028 | 33.22737 | 29.39258 | 37.52552 |
| 17523908 | Cep126    | centrosomal protein 126                                                          | 2.406006 | 2.748663 | 2.72926  | 2.426186 | 2.537469 | 2.893088 |
| 17282980 | Cep128    | centrosomal protein 128                                                          | 6.735663 | 7.413527 | 7.413527 | 7.698994 | 5.573679 | 7.344835 |
| 17272971 | Cep131    | centrosomal protein 131                                                          | 19.91923 | 22.42522 | 20.45356 | 21.16898 | 19.27622 | 17.18371 |
| 17438361 | Cep135    | centrosomal protein 135                                                          | 17.04102 | 17.93381 | 20.30144 | 17.07318 | 22.79539 | 21.25028 |
| 17390950 | Cep152    | centrosomal protein 152                                                          | 6.287864 | 6.721345 | 7.439419 | 7.773477 | 6.546664 | 6.071151 |
| 17529449 | Cep162    | centrosomal protein 162                                                          | 12.14045 | 13.75448 | 12.14045 | 12.96347 | 12.14045 | 11.64493 |
| 17526514 | Cep164    | centrosomal protein 164                                                          | 16.09711 | 19.11867 | 15.23914 | 18.49649 | 16.5083  | 13.57095 |
| 17230195 | Cep170    | centrosomal protein 170                                                          | 26.30545 | 24.5883  | 25.80824 | 18.47036 | 18.17433 | 21.05382 |

|          |         |                                                                               |          |          |          |          |          |          |
|----------|---------|-------------------------------------------------------------------------------|----------|----------|----------|----------|----------|----------|
| 17279381 | Cep170b | centrosomal protein 170B                                                      | 47.65415 | 46.77222 | 51.24715 | 48.24809 | 48.99457 | 44.20722 |
| 17324733 | Cep19   | centrosomal protein 19                                                        | 12.44807 | 11.40243 | 9.965278 | 11.40243 | 12.84424 | 8.563081 |
| 17351511 | Cep192  | centrosomal protein 192                                                       | 8.995167 | 12.90564 | 12.00231 | 12.08118 | 15.09156 | 13.68108 |
| 17378468 | Cep250  | centrosomal protein 250                                                       | 19.42873 | 20.99131 | 19.10807 | 18.2085  | 17.96927 | 18.03128 |
| 17236934 | Cep290  | centrosomal protein 290                                                       | 11.13338 | 9.909004 | 9.497844 | 10.61344 | 9.762563 | 11.54071 |
| 17524170 | Cep295  | centrosomal protein 295                                                       | 14.41791 | 14.99043 | 16.04909 | 13.43356 | 12.96356 | 16.27573 |
| 17228426 | Cep350  | centrosomal protein 350                                                       | 63.79449 | 75.10463 | 79.08707 | 69.26142 | 70.27015 | 70.07316 |
| 17465535 | Cep41   | centrosomal protein 41                                                        | 5.264513 | 5.795849 | 6.401633 | 5.599275 | 5.890255 | 5.338928 |
| 17509435 | Cep44   | centrosomal protein 44                                                        | 6.6312   | 7.526035 | 7.314656 | 6.155517 | 10.23628 | 6.635108 |
| 17359098 | Cep55   | centrosomal protein 55                                                        | 4.008521 | 4.358434 | 3.431668 | 3.227887 | 3.057177 | 3.278396 |
| 17523994 | Cep57   | centrosomal protein 57                                                        | 17.24516 | 17.91083 | 18.49649 | 17.40572 | 15.03216 | 21.84544 |
| 17240484 | Cep57l1 | centrosomal protein 57-like 1                                                 | 11.15687 | 12.60295 | 12.60295 | 14.29987 | 11.15772 | 10.9576  |
| 17530203 | Cep63   | centrosomal protein 63                                                        | 16.3769  | 18.49649 | 21.18704 | 18.49649 | 19.14147 | 19.04935 |
| 17260855 | Cep68   | centrosomal protein 68                                                        | 14.60398 | 16.10559 | 17.22951 | 14.53632 | 11.54647 | 15.0002  |
| 17520687 | Cep70   | centrosomal protein 70                                                        | 3.549387 | 4.959381 | 5.094745 | 4.589796 | 5.464085 | 4.788122 |
| 17294324 | Cep72   | centrosomal protein 72                                                        | 3.26916  | 5.187466 | 5.089274 | 4.470078 | 3.81724  | 4.031146 |
| 17355213 | Cep76   | centrosomal protein 76                                                        | 18.16312 | 13.78436 | 13.09333 | 11.11018 | 13.78436 | 9.981938 |
| 17363220 | Cep78   | centrosomal protein 78                                                        | 11.56369 | 9.972049 | 10.21084 | 9.922062 | 11.51298 | 11.60456 |
| 17236708 | Cep83   | centrosomal protein 83                                                        | 22.70172 | 22.70172 | 22.70172 | 21.3643  | 22.70172 | 18.64646 |
| 17244435 | Cep83os | centrosomal protein 83, opposite strand                                       | 8.441913 | 7.892925 | 8.441913 | 7.613765 | 9.310251 | 7.149389 |
| 17431187 | Cep85   | centrosomal protein 85                                                        | 29.78533 | 32.48654 | 38.02694 | 43.15782 | 47.80534 | 41.49139 |
| 17240819 | Cep85l  | centrosomal protein 85-like                                                   | 43.44084 | 38.42225 | 47.40772 | 57.40442 | 56.61294 | 56.70445 |
| 17476773 | Cep89   | centrosomal protein 89                                                        | 6.760079 | 7.44076  | 9.24876  | 10.20766 | 7.201014 | 8.648021 |
| 17257612 | Cep95   | centrosomal protein 95                                                        | 10.06085 | 11.01639 | 10.72414 | 11.10217 | 11.25817 | 11.57949 |
| 17330998 | Cep97   | centrosomal protein 97                                                        | 12.12372 | 11.59451 | 9.961963 | 12.90859 | 11.59451 | 12.37666 |
| 17211090 | Cspp1   | centrosome and spindle pole associated protein 1                              | 34.85708 | 30.75331 | 28.60569 | 34.22456 | 39.04024 | 35.54661 |
| 17320143 | Cerk    | ceramide kinase                                                               | 14.64585 | 24.01061 | 30.74564 | 22.67593 | 23.80232 | 20.00405 |
| 17387246 | Cerkl   | ceramide kinase-like                                                          | 10.934   | 12.80762 | 18.08686 | 14.16315 | 13.39423 | 15.1191  |
| 17400317 | Cers2   | ceramide synthase 2                                                           | 192.9402 | 190.8466 | 189.9716 | 190.9102 | 174.8483 | 189.0468 |
| 17479027 | Cers3   | ceramide synthase 3                                                           | 4.717688 | 3.646368 | 3.834876 | 3.570312 | 4.352065 | 6.029841 |
| 17498847 | Cers4   | ceramide synthase 4                                                           | 9.047881 | 9.821817 | 11.15749 | 9.360074 | 8.433491 | 10.7376  |
| 17321630 | Cers5   | ceramide synthase 5                                                           | 8.467112 | 9.023268 | 8.467112 | 7.423091 | 8.467112 | 7.538356 |
| 17371374 | Cers6   | ceramide synthase 6                                                           | 59.21127 | 72.56591 | 73.58501 | 61.98082 | 72.77848 | 58.90875 |
| 17433909 | Cptp    | ceramide-1-phosphate transfer protein                                         | 25.76124 | 21.85483 | 23.16123 | 25.16872 | 16.638   | 22.64138 |
| 17426803 | Cer1    | cerberus 1 homolog (Xenopus laevis)                                           | 5.146137 | 4.790911 | 5.953054 | 4.582262 | 4.542354 | 7.328663 |
| 17542034 | Cdr1    | cerebellar degeneration related antigen 1                                     | 2.672759 | 2.713171 | 2.937869 | 2.570555 | 2.881999 | 2.716596 |
| 17495821 | Cdr2    | cerebellar degeneration-related 2                                             | 10.17756 | 11.19498 | 10.7208  | 12.76976 | 9.015516 | 10.8396  |
| 17258178 | Cdr2l   | cerebellar degeneration-related protein 2-like                                | 22.21789 | 22.50292 | 23.02246 | 20.26193 | 14.82561 | 24.36706 |
| 17511474 | Cbln1   | cerebellin 1 precursor protein                                                | 6.606747 | 5.888907 | 5.453907 | 5.917591 | 6.030928 | 5.787539 |
| 17352265 | Cbln2   | cerebellin 2 precursor protein                                                | 6.570804 | 7.698994 | 6.788675 | 5.482409 | 6.179928 | 5.783168 |
| 17306921 | Cbln3   | cerebellin 3 precursor protein                                                | 5.984829 | 6.123472 | 5.672757 | 4.915608 | 5.147065 | 6.237509 |
| 17395009 | Cbln4   | cerebellin 4 precursor protein                                                | 3.892616 | 3.988566 | 3.988566 | 3.585191 | 4.055585 | 3.62555  |
| 17216683 | Celrr   | cerebellum expressed regulatory RNA                                           | 6.247028 | 6.156242 | 5.617429 | 6.247028 | 5.567038 | 6.776451 |
| 17469556 | Crbn    | cereblon                                                                      | 61.89496 | 75.81966 | 77.14389 | 78.70154 | 66.92438 | 84.67769 |
| 17247158 | Ccm2    | cerebral cavernous malformation 2                                             | 17.36523 | 17.36523 | 23.25711 | 17.36523 | 15.77808 | 15.26293 |
| 17377857 | Ccm2l   | cerebral cavernous malformation 2-like                                        | 12.2898  | 15.55903 | 14.76634 | 14.14353 | 12.43436 | 14.26611 |
| 17366428 | Cdnf    | cerebral dopamine neurotrophic factor                                         | 6.559837 | 4.801649 | 4.482924 | 5.765637 | 5.882625 | 6.004233 |
| 17368930 | Cercam  | cerebral endothelial cell adhesion molecule                                   | 3.498363 | 4.597342 | 3.676034 | 4.37393  | 4.280087 | 5.253103 |
| 17496310 | Cln3    | ceroid lipofuscinosis, neuronal 3, juvenile (Batten, Spielmeier-Vogt disease) | 30.58368 | 27.49905 | 29.01969 | 21.28197 | 28.82982 | 22.35848 |
| 17302483 | Cln5    | ceroid-lipofuscinosis, neuronal 5                                             | 72.96183 | 61.78137 | 64.41211 | 61.53861 | 77.20113 | 60.18366 |
| 17518227 | Cln6    | ceroid-lipofuscinosis, neuronal 6                                             | 19.03206 | 20.51148 | 27.70511 | 20.58797 | 16.92718 | 18.23161 |
| 17499436 | Cln8    | ceroid-lipofuscinosis, neuronal 8                                             | 21.83847 | 23.45494 | 20.88652 | 18.49649 | 19.56184 | 18.62954 |
| 17396260 | Cp      | ceruloplasm                                                                   | 1216.466 | 1177.091 | 1082.394 | 998.5079 | 1186.774 | 885.8017 |
| 17539536 | Figf    | c-fos induced growth factor                                                   | 9.151131 | 8.134987 | 9.64673  | 8.105212 | 7.027639 | 8.124055 |
| 17326527 | Cggbp1  | CGG triplet repeat binding protein 1                                          | 103.6618 | 89.67476 | 83.51596 | 81.04998 | 94.92393 | 93.36112 |
| 17374807 | Chac1   | ChaC, cation transport regulator 1                                            | 18.88724 | 18.34926 | 21.91338 | 18.55376 | 22.18942 | 18.19979 |
| 17261417 | Chac2   | ChaC, cation transport regulator 2                                            | 63.71407 | 51.07339 | 45.07076 | 59.91436 | 70.31448 | 72.57899 |
| 17245171 | Cct2    | chaperonin containing Tcp1, subunit 2 (beta)                                  | 308.6205 | 270.5272 | 249.9005 | 272.5033 | 251.8394 | 251.0359 |
| 17399012 | Cct3    | chaperonin containing Tcp1, subunit 3 (gamma)                                 | 128.0515 | 109.5602 | 108.2325 | 109.5617 | 86.68858 | 92.32887 |
| 17247656 | Cct4    | chaperonin containing Tcp1, subunit 4 (delta)                                 | 100.9684 | 108.6677 | 102.4276 | 107.0625 | 103.969  | 102.4276 |
| 17316328 | Cct5    | chaperonin containing Tcp1, subunit 5 (epsilon)                               | 118.5104 | 104.8483 | 94.91538 | 97.17815 | 100.5988 | 107.6482 |
| 17442925 | Cct6a   | chaperonin containing Tcp1, subunit 6a (zeta)                                 | 293.8997 | 224.4344 | 216.6271 | 230.5427 | 202.8782 | 225.6542 |
| 17266773 | Cct6b   | chaperonin containing Tcp1, subunit 6b (zeta)                                 | 3.945068 | 4.346608 | 4.171829 | 4.375749 | 4.61001  | 4.429857 |
| 17460293 | Cct7    | chaperonin containing Tcp1, subunit 7 (eta)                                   | 91.44929 | 92.21056 | 88.98005 | 88.31215 | 87.16095 | 91.5533  |
| 17331774 | Cct8    | chaperonin containing Tcp1, subunit 8 (theta)                                 | 205.0696 | 179.7615 | 166.4067 | 179.0154 | 191.3049 | 179.7615 |
| 17435499 | Cct8l1  | chaperonin containing TCP1, subunit 8 (theta)-like 1                          | 3.675626 | 3.861603 | 3.339703 | 2.953407 | 3.339703 | 3.339703 |
| 17513871 | Chmp1a  | charged multivesicular body protein 1A                                        | 47.30596 | 52.78368 | 59.05757 | 64.30683 | 52.06024 | 54.27403 |
| 17351444 | Chmp1b  | charged multivesicular body protein 1B                                        | 59.90523 | 66.77471 | 50.53006 | 69.96056 | 75.90326 | 60.05948 |
| 17486611 | Chmp2a  | charged multivesicular body protein 2A                                        | 151.2278 | 207.6385 | 187.3173 | 190.0203 | 200.496  | 208.3911 |
| 17331438 | Chmp2b  | charged multivesicular body protein 2B                                        | 59.44568 | 63.02796 | 74.13023 | 78.26362 | 71.25454 | 71.04986 |
| 17459504 | Chmp3   | charged multivesicular body protein 3                                         | 37.35242 | 43.43482 | 39.36714 | 35.1531  | 40.37695 | 40.99881 |
| 17378260 | Chmp4b  | charged multivesicular body protein 4B                                        | 68.29273 | 66.34473 | 65.00415 | 69.25998 | 81.11462 | 66.20737 |
| 17396069 | Chmp4c  | charged multivesicular body protein 4C                                        | 10.61542 | 10.82504 | 9.952852 | 11.47252 | 9.941958 | 11.54879 |
| 17412801 | Chmp5   | charged multivesicular body protein 5                                         | 157.7537 | 145.0483 | 141.1886 | 142.875  | 140.4955 | 157.1295 |
| 17259220 | Chmp6   | charged multivesicular body protein 6                                         | 24.52617 | 23.70698 | 23.70698 | 27.05794 | 20.40994 | 23.26163 |
| 17308182 | Chmp7   | charged multivesicular body protein 7                                         | 62.53188 | 62.47772 | 61.89453 | 68.48851 | 57.62328 | 58.74931 |
| 17525503 | Chek1   | checkpoint kinase 1                                                           | 4.387928 | 5.172709 | 4.352065 | 4.57287  | 4.352065 | 4.459772 |
| 17440575 | Chek2   | checkpoint kinase 2                                                           | 11.6396  | 11.06652 | 8.375295 | 9.822362 | 9.946783 | 9.224687 |
| 17440387 | Chfr    | checkpoint with forkhead and ring finger domains                              | 34.51281 | 35.29618 | 28.78988 | 35.29618 | 32.50388 | 40.01475 |
| 17229187 | Xcl1    | chemokine (C motif) ligand 1                                                  | 7.513734 | 7.814535 | 7.814535 | 8.51685  | 9.120102 | 7.814535 |
| 17532564 | Xcr1    | chemokine (C motif) receptor 1                                                | 5.143178 | 4.987269 | 5.143178 | 4.848303 | 4.635195 | 6.878719 |
| 17266754 | Ccl1    | chemokine (C-C motif) ligand 1                                                | 6.055474 | 6.384749 | 5.445445 | 7.100792 | 7.063631 | 6.244257 |
| 17254053 | Ccl11   | chemokine (C-C motif) ligand 11                                               | 9.777055 | 9.335388 | 8.597219 | 9.335388 | 11.33655 | 11.24366 |
| 17254059 | Ccl12   | chemokine (C-C motif) ligand 12                                               | 3.442269 | 3.558527 | 3.762522 | 3.270611 | 3.178465 | 2.874199 |

|          |           |                                                                   |          |          |          |          |          |          |
|----------|-----------|-------------------------------------------------------------------|----------|----------|----------|----------|----------|----------|
| 17504138 | Ccl17     | chemokine (C-C motif) ligand 17                                   | 4.806278 | 4.125674 | 3.175008 | 3.781163 | 3.702552 | 4.096012 |
| 17434280 | Ccl19     | chemokine (C-C motif) ligand 19                                   | 14.57264 | 14.91581 | 19.39819 | 14.21419 | 14.30641 | 17.29988 |
| 17254041 | Ccl2      | chemokine (C-C motif) ligand 2                                    | 12.07298 | 17.44994 | 14.62769 | 16.70734 | 12.68578 | 9.018891 |
| 17214857 | Ccl20     | chemokine (C-C motif) ligand 20                                   | 5.600944 | 6.667426 | 7.742825 | 6.402743 | 7.013721 | 8.752772 |
| 17504122 | Ccl22     | chemokine (C-C motif) ligand 22                                   | 4.739977 | 6.143965 | 5.021749 | 5.774436 | 6.820795 | 5.426154 |
| 17453611 | Ccl24     | chemokine (C-C motif) ligand 24                                   | 11.74651 | 14.33848 | 20.87479 | 16.23595 | 14.43961 | 9.415254 |
| 17498830 | Ccl25     | chemokine (C-C motif) ligand 25                                   | 34.23096 | 33.9759  | 36.78842 | 35.60135 | 24.62855 | 30.9522  |
| 17453607 | Ccl26     | chemokine (C-C motif) ligand 26                                   | 4.381425 | 3.939848 | 3.54506  | 3.292378 | 2.84591  | 4.01862  |
| 17424331 | Ccl27a    | chemokine (C-C motif) ligand 27A                                  | 13.40398 | 13.72429 | 13.02228 | 13.31712 | 11.56746 | 13.39953 |
| 17290163 | Ccl28     | chemokine (C-C motif) ligand 28                                   | 5.727518 | 5.696122 | 4.760292 | 6.255261 | 5.595705 | 5.79822  |
| 17266967 | Ccl3      | chemokine (C-C motif) ligand 3                                    | 5.338965 | 5.378709 | 7.698994 | 5.338965 | 7.261311 | 5.597839 |
| 17254283 | Ccl4      | chemokine (C-C motif) ligand 4                                    | 12.29654 | 8.637836 | 8.429225 | 8.429225 | 8.978286 | 11.60352 |
| 17266946 | Ccl5      | chemokine (C-C motif) ligand 5                                    | 30.51274 | 38.3919  | 33.36469 | 28.54745 | 29.4654  | 32.33176 |
| 17266960 | Ccl6      | chemokine (C-C motif) ligand 6                                    | 21.12999 | 23.93915 | 43.24825 | 26.79831 | 25.7682  | 21.79205 |
| 17254047 | Ccl7      | chemokine (C-C motif) ligand 7                                    | 18.29896 | 26.76118 | 24.62599 | 16.66582 | 21.36148 | 21.24498 |
| 17254065 | Ccl8      | chemokine (C-C motif) ligand 8                                    | 4.083907 | 3.640054 | 3.140687 | 4.459679 | 4.581976 | 3.872218 |
| 17266952 | Ccl9      | chemokine (C-C motif) ligand 9                                    | 21.09621 | 223.9946 | 231.8535 | 241.9475 | 327.1821 | 283.9691 |
| 17532569 | Ccr1      | chemokine (C-C motif) receptor 1                                  | 3.564328 | 3.098607 | 4.008799 | 4.545125 | 2.920732 | 2.783635 |
| 17269806 | Ccr10     | chemokine (C-C motif) receptor 10                                 | 6.747813 | 6.017357 | 7.468042 | 7.436377 | 5.467912 | 6.848699 |
| 17532574 | Ccr11     | chemokine (C-C motif) receptor 1-like 1                           | 4.571508 | 2.861318 | 2.481049 | 2.789526 | 2.769125 | 2.861318 |
| 17523650 | Ccr2      | chemokine (C-C motif) receptor 2                                  | 4.548151 | 4.346488 | 4.827747 | 4.355354 | 4.351642 | 4.911828 |
| 17523646 | Ccr3      | chemokine (C-C motif) receptor 3                                  | 2.81911  | 2.81911  | 2.741832 | 2.81911  | 2.81911  | 2.81911  |
| 17531887 | Ccr4      | chemokine (C-C motif) receptor 4                                  | 4.620759 | 3.651097 | 4.137244 | 3.309997 | 3.940941 | 3.709154 |
| 17523659 | Ccr5      | chemokine (C-C motif) receptor 5                                  | 9.116689 | 9.237036 | 10.66876 | 9.194238 | 9.194238 | 5.79103  |
| 17333066 | Ccr6      | chemokine (C-C motif) receptor 6                                  | 4.537948 | 4.537948 | 4.244928 | 4.708084 | 4.774998 | 4.537948 |
| 17268972 | Ccr7      | chemokine (C-C motif) receptor 7                                  | 6.169185 | 10.98201 | 9.389641 | 10.24771 | 7.066227 | 8.140966 |
| 17523158 | Ccr8      | chemokine (C-C motif) receptor 8                                  | 4.327789 | 4.619927 | 4.385222 | 4.091302 | 3.463018 | 6.71115  |
| 17523633 | Ccr9      | chemokine (C-C motif) receptor 9                                  | 2.406006 | 3.685295 | 3.685295 | 3.114499 | 3.601755 | 3.685295 |
| 17531705 | Ccr12     | chemokine (C-C motif) receptor-like 2                             | 7.891557 | 7.938245 | 6.295278 | 6.173677 | 5.990473 | 7.667467 |
| 17504130 | Cx3cl1    | chemokine (C-X3-C motif) ligand 1                                 | 12.46914 | 11.78966 | 10.70995 | 13.86725 | 13.25395 | 12.19561 |
| 17532268 | Cx3cr1    | chemokine (C-X3-C motif) receptor 1                               | 13.23898 | 16.36612 | 15.23914 | 18.93574 | 14.93174 | 14.84063 |
| 17438987 | Cxcl1     | chemokine (C-X-C motif) ligand 1                                  | 23.19384 | 21.50559 | 33.35058 | 31.25684 | 31.5833  | 22.37941 |
| 17449718 | Cxcl10    | chemokine (C-X-C motif) ligand 10                                 | 18.73845 | 14.99968 | 18.52305 | 13.52953 | 14.99968 | 14.30998 |
| 17449725 | Cxcl11    | chemokine (C-X-C motif) ligand 11                                 | 7.319728 | 12.51    | 12.53708 | 16.80571 | 12.43082 | 7.730437 |
| 17462149 | Cxcl12    | chemokine (C-X-C motif) ligand 12                                 | 245.9344 | 223.201  | 249.4799 | 209.1262 | 230.8385 | 216.6992 |
| 17439367 | Cxcl13    | chemokine (C-X-C motif) ligand 13                                 | 28.07103 | 23.42781 | 16.74583 | 17.49778 | 33.94954 | 25.27799 |
| 17293006 | Cxcl14    | chemokine (C-X-C motif) ligand 14                                 | 32.20717 | 25.08686 | 23.75962 | 31.53277 | 61.57616 | 30.63332 |
| 17438980 | Cxcl15    | chemokine (C-X-C motif) ligand 15                                 | 4.436402 | 4.362182 | 4.029218 | 3.832989 | 4.094508 | 3.812111 |
| 17265268 | Cxcl16    | chemokine (C-X-C motif) ligand 16                                 | 33.20204 | 45.92411 | 45.03454 | 34.34004 | 32.44648 | 30.96078 |
| 17487945 | Cxcl17    | chemokine (C-X-C motif) ligand 17                                 | 7.694086 | 8.217389 | 9.563707 | 8.774397 | 6.795125 | 9.074575 |
| 17438995 | Cxcl2     | chemokine (C-X-C motif) ligand 2                                  | 10.85961 | 9.945404 | 10.62219 | 8.778534 | 9.491065 | 10.83938 |
| 17438975 | Cxcl3     | chemokine (C-X-C motif) ligand 3                                  | 2.216003 | 2.817372 | 2.728882 | 2.961319 | 2.458656 | 2.652844 |
| 17438955 | Cxcl5     | chemokine (C-X-C motif) ligand 5                                  | 4.392189 | 5.379268 | 4.771027 | 4.583088 | 4.655416 | 4.927241 |
| 17449710 | Cxcl9     | chemokine (C-X-C motif) ligand 9                                  | 129.884  | 85.88415 | 85.48385 | 71.79542 | 111.1427 | 86.38806 |
| 17224251 | Cxcr1     | chemokine (C-X-C motif) receptor 1                                | 8.120508 | 10.72644 | 8.184873 | 8.798576 | 8.798576 | 9.342897 |
| 17214142 | Cxcr2     | chemokine (C-X-C motif) receptor 2                                | 6.424481 | 7.937639 | 5.79372  | 6.951913 | 6.979047 | 7.599529 |
| 17543625 | Cxcr3     | chemokine (C-X-C motif) receptor 3                                | 5.94761  | 6.287864 | 7.277082 | 7.556457 | 5.582417 | 5.644829 |
| 17226593 | Cxcr4     | chemokine (C-X-C motif) receptor 4                                | 16.90537 | 14.12736 | 13.99171 | 12.00797 | 13.60571 | 13.54633 |
| 17526310 | Cxcr5     | chemokine (C-X-C motif) receptor 5                                | 9.280741 | 6.750339 | 7.302245 | 7.200115 | 6.310569 | 7.179782 |
| 17523642 | Cxcr6     | chemokine (C-X-C motif) receptor 6                                | 3.439789 | 3.579554 | 4.469303 | 3.729934 | 4.256094 | 3.175558 |
| 17504422 | Klf1      | chemokine-like factor                                             | 4.343446 | 5.504723 | 4.184108 | 4.149622 | 3.671934 | 4.421298 |
| 17451390 | Crmklr1   | chemokine-like receptor 1                                         | 8.425019 | 8.012709 | 12.07173 | 8.49221  | 7.852217 | 7.157571 |
| 17313008 | Cby1      | chibby homolog 1 (Drosophila)                                     | 20.72054 | 20.86727 | 23.08078 | 23.46177 | 17.30588 | 22.0583  |
| 17249172 | Cby3      | chibby homolog 3 (Drosophila)                                     | 8.9633   | 9.910515 | 7.544629 | 8.933652 | 10.65863 | 10.76995 |
| 17386569 | Chn1      | chimerin 1                                                        | 3.796184 | 3.569965 | 3.540222 | 3.569965 | 3.526947 | 4.750601 |
| 17372021 | Chn1os1   | chimerin 1, opposite strand 1 [Source:MGI Symbol;Acc:MGI:3702041] | 3.207924 | 3.306787 | 3.271019 | 3.561191 | 4.039313 | 5.160461 |
| 17372013 | Chn1os3   | chimerin 1, opposite strand 3                                     | 6.273324 | 5.56106  | 5.120306 | 7.03451  | 5.482333 | 6.079109 |
| 17458692 | Chn2      | chimerin 2                                                        | 51.44397 | 61.84521 | 64.70925 | 52.14945 | 55.34496 | 60.62328 |
| 17217383 | Chit1     | chitinase 1 (chitotriosidase)                                     | 5.889438 | 6.504779 | 5.979356 | 6.707151 | 6.564659 | 5.889438 |
| 17497957 | Chid1     | chitinase domain containing 1                                     | 34.75094 | 18.03853 | 23.07534 | 26.7217  | 23.54045 | 22.48062 |
| 17401465 | Chia1     | chitinase, acidic 1                                               | 3.402063 | 3.263862 | 3.222119 | 3.263862 | 3.715973 | 2.953407 |
| 17217399 | Chil1     | chitinase-like 1                                                  | 10.28685 | 8.322114 | 9.880198 | 11.37757 | 7.169736 | 8.914476 |
| 17408897 | Chil3     | chitinase-like 3                                                  | 2.747596 | 4.20927  | 2.43277  | 2.953407 | 3.015819 | 3.69481  |
| 17408911 | Chil4     | chitinase-like 4                                                  | 5.610658 | 3.669389 | 4.038473 | 4.080455 | 4.806844 | 4.117418 |
| 17408885 | Chil5     | chitinase-like 5                                                  | 2.338754 | 2.43277  | 2.524487 | 2.588991 | 2.458673 | 2.369643 |
| 17408926 | Chil6     | chitinase-like 6                                                  | 3.065452 | 3.557441 | 4.248872 | 3.92483  | 3.019689 | 4.864731 |
| 17403533 | Ctbs      | chitobiase, di-N-acetyl-                                          | 20.05222 | 20.44846 | 22.57134 | 15.41732 | 24.11468 | 21.73563 |
| 17539797 | Clcn5     | chloride channel 5                                                | 21.79885 | 22.25396 | 25.66215 | 19.61329 | 21.19379 | 17.92002 |
| 17410939 | Clca1     | chloride channel accessory 1                                      | 6.116982 | 5.821537 | 5.713441 | 6.229904 | 5.973556 | 5.716928 |
| 17410956 | Clca2     | chloride channel accessory 2                                      | 2.952322 | 3.751064 | 3.777679 | 3.048818 | 2.726972 | 3.887843 |
| 17410845 | Clca3a1   | chloride channel accessory 3A1                                    | 15.1491  | 17.11323 | 14.96717 | 16.58986 | 13.7855  | 9.310251 |
| 17410863 | Clca3a2   | chloride channel accessory 3A2                                    | 3.274263 | 2.545378 | 2.60364  | 2.813371 | 2.877361 | 2.249213 |
| 17410880 | Clca3b    | chloride channel accessory 3B                                     | 3.049558 | 2.763717 | 2.845969 | 2.911737 | 3.365101 | 3.20004  |
| 17410921 | Clca4a    | chloride channel accessory 4A                                     | 5.576152 | 6.241834 | 4.604358 | 6.897148 | 7.945896 | 6.958662 |
| 17410905 | Clca4b    | chloride channel accessory 4B                                     | 3.462322 | 2.298257 | 1.873414 | 2.507483 | 2.625842 | 2.254941 |
| 17410898 | Clca4c-ps | chloride channel accessory 4C, pseudogene                         | 2.985164 | 4.18492  | 2.610489 | 3.281897 | 3.093071 | 4.507664 |
| 17401768 | Clcc1     | chloride channel CLIC-like 1                                      | 22.2085  | 24.65913 | 23.45267 | 25.51016 | 22.40611 | 25.72519 |
| 17480407 | Clns1a    | chloride channel, nucleotide-sensitive, 1A                        | 58.36979 | 55.86218 | 47.99626 | 53.51643 | 51.12333 | 55.20397 |
| 17457913 | Clcn1     | chloride channel, voltage-sensitive 1                             | 5.885194 | 4.678513 | 6.992896 | 6.164483 | 4.994049 | 5.640527 |
| 17329167 | Clcn2     | chloride channel, voltage-sensitive 2                             | 61.68766 | 63.58127 | 52.79063 | 66.62446 | 65.71679 | 69.23742 |
| 17509506 | Clcn3     | chloride channel, voltage-sensitive 3                             | 27.66653 | 26.36112 | 24.36908 | 33.28938 | 30.10372 | 23.67496 |
| 17486173 | Clcn4     | chloride channel, voltage-sensitive 4                             | 61.42781 | 48.59379 | 54.48926 | 48.20965 | 60.76716 | 45.08139 |
| 17432865 | Clcn6     | chloride channel, voltage-sensitive 6                             | 6.76125  | 8.449992 | 10.01049 | 7.243766 | 11.2109  | 8.420524 |
| 17334545 | Clcn7     | chloride channel, voltage-sensitive 7                             | 39.56108 | 36.77007 | 38.01218 | 36.93739 | 36.7507  | 32.08217 |

|          |            |                                                                 |          |          |          |          |          |          |
|----------|------------|-----------------------------------------------------------------|----------|----------|----------|----------|----------|----------|
| 17432148 | Clcna      | chloride channel, voltage-sensitive Ka                          | 5.067029 | 7.165861 | 6.443748 | 9.048759 | 7.610282 | 6.46845  |
| 17432173 | Clcnkb     | chloride channel, voltage-sensitive Kb                          | 11.81354 | 12.04498 | 10.76264 | 11.44488 | 13.66345 | 14.22533 |
| 17336896 | Clc1       | chloride intracellular channel 1                                | 27.75354 | 29.29698 | 36.76625 | 35.29446 | 27.88718 | 29.29698 |
| 17368069 | Clc3       | chloride intracellular channel 3                                | 13.29968 | 10.07243 | 12.14744 | 12.11347 | 9.498897 | 11.36338 |
| 17431394 | Clc4       | chloride intracellular channel 4 (mitochondrial)                | 179.7739 | 153.9566 | 190.6893 | 161.4944 | 153.6869 | 132.6242 |
| 17337852 | Clc5       | chloride intracellular channel 5                                | 11.90735 | 10.94159 | 11.14975 | 14.36255 | 14.22138 | 12.0373  |
| 17327236 | Clc6       | chloride intracellular channel 6                                | 3.54506  | 2.983343 | 3.689768 | 4.098256 | 3.958352 | 3.9518   |
| 17532334 | Cck        | cholecystokinin                                                 | 4.489859 | 5.308374 | 4.982121 | 4.433297 | 7.199666 | 4.999972 |
| 17448135 | Cckar      | cholecystokinin A receptor                                      | 3.748465 | 3.574719 | 2.533743 | 3.077865 | 2.996046 | 3.809205 |
| 17481378 | Cckbr      | cholecystokinin B receptor                                      | 4.348507 | 6.092608 | 4.860012 | 4.407498 | 5.728709 | 4.742244 |
| 17364111 | Ch25h      | cholesterol 25-hydroxylase                                      | 3.949828 | 3.657429 | 4.552692 | 3.713321 | 4.077232 | 4.960722 |
| 17304880 | Chat       | choline acetyltransferase                                       | 5.528431 | 5.032307 | 3.634684 | 4.681043 | 3.73296  | 5.305284 |
| 17298155 | Chdh       | choline dehydrogenase                                           | 128.0275 | 128.0275 | 140.7675 | 122.7177 | 129.6474 | 114.0545 |
| 17355984 | Chka       | choline kinase alpha                                            | 105.3926 | 78.77249 | 60.0241  | 81.41372 | 87.19358 | 72.23069 |
| 17320499 | Chkb       | choline kinase beta                                             | 20.62268 | 32.29995 | 37.08927 | 26.76619 | 18.94821 | 27.91425 |
| 17243888 | Chpt1      | choline phosphotransferase 1                                    | 110.0382 | 127.011  | 93.80611 | 120.0074 | 105.7197 | 117.6934 |
| 17408945 | Cept1      | choline/ethanolaminephosphotransferase 1                        | 154.3466 | 136.1922 | 151.143  | 126.3656 | 120.1789 | 121.6717 |
| 17357120 | Chrm1      | cholinergic receptor, muscarinic 1, CNS                         | 8.561657 | 10.30905 | 8.561657 | 8.083724 | 7.91654  | 10.33732 |
| 17457310 | Chrm2      | cholinergic receptor, muscarinic 2, cardiac                     | 4.257127 | 3.07842  | 3.686725 | 5.259589 | 4.745565 | 3.829272 |
| 17290447 | Chrm3      | cholinergic receptor, muscarinic 3, cardiac                     | 12.1217  | 5.898058 | 6.287864 | 5.752145 | 8.381451 | 4.836824 |
| 17373443 | Chrm4      | cholinergic receptor, muscarinic 4                              | 3.916541 | 4.165703 | 5.993796 | 4.514387 | 4.739813 | 4.680848 |
| 17389335 | Chrm5      | cholinergic receptor, muscarinic 5                              | 2.939743 | 3.639146 | 3.074944 | 2.912625 | 3.112082 | 3.397586 |
| 17386557 | Chrna1     | cholinergic receptor, nicotinic, alpha polypeptide 1 (muscle)   | 2.953407 | 3.478439 | 2.472808 | 2.953407 | 2.828015 | 3.20004  |
| 17494033 | Chrna10    | cholinergic receptor, nicotinic, alpha polypeptide 10           | 4.261585 | 5.886663 | 3.644498 | 3.868435 | 4.829219 | 4.159067 |
| 17301468 | Chrna2     | cholinergic receptor, nicotinic, alpha polypeptide 2 (neuronal) | 34.6689  | 32.43366 | 33.26401 | 30.63056 | 23.90897 | 27.23028 |
| 17527312 | Chrna3     | cholinergic receptor, nicotinic, alpha polypeptide 3            | 7.628397 | 5.968507 | 6.606976 | 5.519548 | 6.562793 | 7.676454 |
| 17395718 | Chrna4     | cholinergic receptor, nicotinic, alpha polypeptide 4            | 5.567501 | 5.16565  | 5.589348 | 7.514932 | 5.906895 | 5.748478 |
| 17517469 | Chrna5     | cholinergic receptor, nicotinic, alpha polypeptide 5            | 3.530029 | 3.713681 | 4.050865 | 3.713681 | 3.713681 | 3.906455 |
| 17508554 | Chrna6     | cholinergic receptor, nicotinic, alpha polypeptide 6            | 4.793136 | 6.187343 | 6.192749 | 5.022689 | 6.684316 | 5.29397  |
| 17491763 | Chrna7     | cholinergic receptor, nicotinic, alpha polypeptide 7            | 14.16089 | 15.36771 | 13.48141 | 12.49068 | 12.06236 | 10.51787 |
| 17437836 | Chrna9     | cholinergic receptor, nicotinic, alpha polypeptide 9            | 5.839278 | 5.223837 | 5.733953 | 6.185542 | 5.449788 | 5.978029 |
| 17264946 | Chrnb1     | cholinergic receptor, nicotinic, beta polypeptide 1 (muscle)    | 4.031705 | 3.753249 | 4.808677 | 3.919501 | 4.28347  | 3.899935 |
| 17407124 | Chrnb2     | cholinergic receptor, nicotinic, beta polypeptide 2 (neuronal)  | 4.990658 | 4.800118 | 6.747345 | 3.638036 | 4.867024 | 4.517204 |
| 17500340 | Chrnb3     | cholinergic receptor, nicotinic, beta polypeptide 3             | 3.703322 | 4.785733 | 3.703322 | 4.469118 | 3.89097  | 3.339703 |
| 17527323 | Chrnb4     | cholinergic receptor, nicotinic, beta polypeptide 4             | 8.34279  | 9.235179 | 8.802541 | 10.11167 | 8.51685  | 9.899324 |
| 17215192 | Chrmd      | cholinergic receptor, nicotinic, delta polypeptide              | 6.992896 | 6.328967 | 7.799816 | 5.752863 | 5.11988  | 8.652758 |
| 17265285 | Chrne      | cholinergic receptor, nicotinic, epsilon polypeptide            | 5.073601 | 7.408852 | 6.016982 | 6.091848 | 5.267104 | 6.434553 |
| 17215208 | Chrng      | cholinergic receptor, nicotinic, gamma polypeptide              | 6.943774 | 7.413938 | 6.49928  | 6.943774 | 6.943774 | 6.283333 |
| 17255227 | Chad       | chondroadherin                                                  | 7.040608 | 6.139708 | 7.698994 | 6.867    | 7.433491 | 5.532226 |
| 17319494 | Chadl      | chondroadherin-like                                             | 7.76061  | 8.764246 | 8.992486 | 7.76061  | 5.988398 | 6.015606 |
| 17224620 | Chpf       | chondroitin polymerizing factor                                 | 17.26454 | 16.13498 | 18.55724 | 17.30564 | 19.22071 | 15.31443 |
| 17435403 | Chpf2      | chondroitin polymerizing factor 2                               | 9.888488 | 13.27426 | 11.56746 | 11.99175 | 11.52025 | 14.14196 |
| 17509758 | Csgalnact1 | chondroitin sulfate N-acetylgalactosaminyltransferase 1         | 4.998932 | 4.752972 | 4.479352 | 4.632529 | 3.912254 | 4.09255  |
| 17470105 | Csgalnact2 | chondroitin sulfate N-acetylgalactosaminyltransferase 2         | 15.5669  | 10.91326 | 12.08671 | 12.2489  | 12.6625  | 17.05307 |
| 17517592 | Cspg4      | chondroitin sulfate proteoglycan 4                              | 8.420524 | 12.96131 | 8.420524 | 8.420524 | 7.151173 | 10.00355 |
| 17522319 | Cspg5      | chondroitin sulfate proteoglycan 5                              | 7.401615 | 8.598232 | 5.708889 | 6.267977 | 7.681936 | 6.926661 |
| 17479006 | Chsy1      | chondroitin sulfate synthase 1                                  | 32.40535 | 40.4927  | 41.67586 | 36.89875 | 40.86602 | 40.78085 |
| 17350909 | Chsy3      | chondroitin sulfate synthase 3                                  | 22.2045  | 18.7317  | 18.38338 | 15.44438 | 15.5628  | 23.68645 |
| 17326735 | Chodl      | chondrolectin                                                   | 3.862353 | 3.795395 | 4.000083 | 3.580125 | 3.79908  | 3.446185 |
| 17324135 | Chrd       | chordin                                                         | 7.373962 | 6.400879 | 7.893417 | 7.123025 | 6.394848 | 8.331233 |
| 17545087 | Chrdl1     | chordin-like 1                                                  | 3.754472 | 4.801649 | 3.104885 | 4.422616 | 3.279464 | 3.729055 |
| 17480620 | Chrdl2     | chordin-like 2                                                  | 6.440488 | 7.910835 | 6.440488 | 5.932006 | 6.719528 | 6.62284  |
| 17230174 | Chml       | choroideremia-like                                              | 9.266728 | 10.18815 | 9.123011 | 9.123011 | 8.642628 | 8.633587 |
| 17544244 | Chm        | choroideremia (RAB escort protein 1)                            | 47.95934 | 46.70516 | 45.87798 | 48.55271 | 51.26847 | 44.22438 |
| 17312089 | Chrac1     | chromatin accessibility complex 1                               | 30.08036 | 29.49033 | 29.06236 | 28.47413 | 29.28967 | 33.08235 |
| 17338701 | Chaf1a     | chromatin assembly factor 1, subunit A (p150)                   | 6.339109 | 8.40146  | 6.575087 | 6.465446 | 8.116006 | 9.569543 |
| 17327331 | Chaf1b     | chromatin assembly factor 1, subunit B (p60)                    | 10.49071 | 10.38004 | 11.29851 | 8.882772 | 10.27894 | 10.54955 |
| 17506418 | Cdt1       | chromatin licensing and DNA replication factor 1                | 13.06803 | 17.11797 | 17.74462 | 11.38246 | 14.99469 | 16.19549 |
| 17407341 | Chtop      | chromatin target of PRMT1                                       | 28.86281 | 32.65654 | 25.20661 | 31.03749 | 31.03749 | 35.46146 |
| 17255653 | Cbx1       | chromobox 1                                                     | 31.01555 | 27.42691 | 30.19756 | 34.99677 | 33.20457 | 32.28764 |
| 17258947 | Cbx2       | chromobox 2                                                     | 35.96296 | 34.12318 | 34.12318 | 30.87763 | 36.00187 | 38.47688 |
| 17458561 | Cbx3       | chromobox 3                                                     | 53.7026  | 77.37577 | 75.66216 | 80.33852 | 70.04014 | 91.34476 |
| 17288221 | Cbx3-ps2   | chromobox 3, pseudogene 2 [Source:MGI Symbol;Acc:MGI:1890539]   | 2.535482 | 2.67402  | 2.67402  | 2.459219 | 2.67402  | 3.339703 |
| 17308622 | Cbx3-ps6   | chromobox 3, pseudogene 6 [Source:MGI Symbol;Acc:MGI:3646710]   | 151.1796 | 191.2452 | 213.0015 | 189.7755 | 221.8084 | 230.9809 |
| 17213185 | Cbx3-ps7   | chromobox 3, pseudogene 7 [Source:MGI Symbol;Acc:MGI:3704187]   | 76.53883 | 76.19424 | 75.07653 | 71.18888 | 78.71027 | 85.33407 |
| 17548912 | Cbx3-ps7   | chromobox 3, pseudogene 7 [Source:MGI Symbol;Acc:MGI:3704187]   | 85.00053 | 94.26433 | 107.3568 | 94.51622 | 100.2209 | 112.9539 |
| 17272857 | Cbx4       | chromobox 4                                                     | 31.56907 | 31.66594 | 27.52747 | 35.39614 | 29.82975 | 39.77362 |
| 17322327 | Cbx5       | chromobox 5                                                     | 23.89919 | 23.18806 | 22.40626 | 23.22699 | 23.89919 | 25.36118 |
| 17319366 | Cbx7       | chromobox 7                                                     | 14.42761 | 17.55634 | 15.36558 | 17.91381 | 15.91362 | 17.42697 |
| 17272845 | Cbx8       | chromobox 8                                                     | 7.664172 | 9.003525 | 8.041809 | 9.568084 | 8.03039  | 9.497778 |
| 17333589 | Chd1       | chromodomain helicase DNA binding protein 1                     | 74.81782 | 71.78647 | 61.81393 | 71.02377 | 60.74821 | 62.12405 |
| 17408184 | Chd1l      | chromodomain helicase DNA binding protein 1-like                | 12.20474 | 14.93929 | 16.83206 | 14.73137 | 16.83206 | 14.97444 |
| 17492114 | Chd2       | chromodomain helicase DNA binding protein 2                     | 22.04455 | 29.70883 | 32.78264 | 26.27229 | 29.7041  | 29.70101 |
| 17264588 | Chd3       | chromodomain helicase DNA binding protein 3                     | 64.10833 | 76.74921 | 95.0576  | 86.12797 | 72.31485 | 75.333   |
| 17251634 | Chd3os     | chromodomain helicase DNA binding protein 3, opposite strand    | 4.063154 | 3.751922 | 4.151953 | 4.172754 | 5.159531 | 4.134606 |
| 17463056 | Chd4       | chromodomain helicase DNA binding protein 4                     | 96.33713 | 100.0086 | 93.16719 | 101.4904 | 89.67911 | 91.44865 |
| 17422170 | Chd5       | chromodomain helicase DNA binding protein 5                     | 12.53961 | 12.88115 | 11.2834  | 11.86212 | 15.32909 | 12.65346 |
| 17393910 | Chd6       | chromodomain helicase DNA binding protein 6                     | 17.49717 | 17.98958 | 19.05846 | 18.04553 | 18.3067  | 20.79219 |
| 17411647 | Chd7       | chromodomain helicase DNA binding protein 7                     | 17.29556 | 25.96111 | 29.57672 | 27.5164  | 28.7253  | 31.22631 |
| 17306230 | Chd8       | chromodomain helicase DNA binding protein 8                     | 43.73875 | 41.93724 | 43.96123 | 40.95478 | 47.87    | 45.47904 |
| 17503708 | Chd9       | chromodomain helicase DNA binding protein 9                     | 34.38435 | 33.50815 | 33.71994 | 30.28035 | 33.3707  | 26.49246 |
| 17286553 | Cdyl       | chromodomain protein, Y chromosome-like                         | 8.504403 | 9.419758 | 10.63936 | 9.436553 | 9.69412  | 9.176856 |
| 17513297 | Cdyl2      | chromodomain protein, Y chromosome-like 2                       | 12.98739 | 15.6282  | 12.62219 | 12.98739 | 14.28055 | 13.27068 |
| 17278090 | Chga       | chromogranin A                                                  | 6.286949 | 10.10565 | 8.088712 | 7.161193 | 7.35059  | 7.299006 |

|          |          |                                                        |          |          |          |          |          |          |
|----------|----------|--------------------------------------------------------|----------|----------|----------|----------|----------|----------|
| 17376618 | Chgb     | chromogranin B                                         | 4.699476 | 4.641915 | 4.687829 | 5.551778 | 4.971978 | 4.787359 |
| 17499387 | Champ1   | chromosome alignment maintaining phosphoprotein 1      | 15.88816 | 20.76972 | 22.14808 | 20.71179 | 20.7536  | 18.66664 |
| 17379808 | Cse1l    | chromosome segregation 1-like (S. cerevisiae)          | 128.4684 | 120.8924 | 98.91106 | 118.0701 | 104.3604 | 103.7646 |
| 17276614 | Churc1   | churchill domain containing 1                          | 59.28437 | 56.08449 | 42.43492 | 54.01132 | 55.27557 | 58.91079 |
| 17306937 | Cma1     | chymase 1, mast cell                                   | 2.885157 | 2.529408 | 2.491544 | 2.722421 | 2.81074  | 3.259114 |
| 17300707 | Cma2     | chymase 2, mast cell                                   | 12.29995 | 9.683375 | 11.22738 | 14.69171 | 16.04353 | 14.20336 |
| 17408974 | Cym      | chymosin                                               | 12.02954 | 16.43273 | 16.43273 | 15.75382 | 18.68126 | 16.43273 |
| 17432330 | Ctrc     | chymotrypsin C (caldecrin)                             | 6.669506 | 9.550326 | 6.992896 | 8.324306 | 5.712095 | 7.399357 |
| 17421138 | Ctrcos   | chymotrypsin C (caldecrin), opposite strand            | 9.762834 | 12.89715 | 13.41365 | 11.39509 | 11.56746 | 8.566228 |
| 17512544 | Ctrl     | chymotrypsin-like                                      | 7.127964 | 7.121198 | 6.663037 | 6.799271 | 6.992896 | 10.02965 |
| 17321780 | Cela1    | chymotrypsin-like elastase family, member 1            | 10.70951 | 9.515174 | 10.30755 | 10.80622 | 9.515174 | 11.45766 |
| 17432320 | Cela2a   | chymotrypsin-like elastase family, member 2A           | 6.781009 | 10.11848 | 10.11848 | 12.06988 | 8.156329 | 10.11848 |
| 17431683 | Cela3a   | chymotrypsin-like elastase family, member 3A           | 4.429335 | 3.420886 | 3.984034 | 2.832763 | 3.468423 | 2.868666 |
| 17431693 | Cela3b   | chymotrypsin-like elastase family, member 3B           | 4.022521 | 3.73252  | 3.59116  | 4.034193 | 5.05377  | 3.600083 |
| 17513149 | Ctrb1    | chymotrypsinogen B1                                    | 16.31266 | 17.77897 | 14.50532 | 11.74415 | 13.67321 | 12.57128 |
| 17468900 | Cfap100  | cilia and flagella associated protein 100              | 3.083161 | 3.508587 | 3.560476 | 3.551036 | 3.317623 | 3.670687 |
| 17219208 | Cfap126  | cilia and flagella associated protein 126              | 6.840254 | 9.0837   | 7.992961 | 6.363763 | 6.732816 | 7.992961 |
| 17384008 | Cfap157  | cilia and flagella associated protein 157              | 17.43893 | 20.1619  | 20.42055 | 22.68411 | 18.02778 | 20.68639 |
| 17492930 | Cfap161  | cilia and flagella associated protein 161              | 4.681043 | 4.714321 | 4.494311 | 5.062711 | 4.681043 | 5.863451 |
| 17512001 | Cfap20   | cilia and flagella associated protein 20               | 36.30358 | 40.34142 | 38.12618 | 41.51296 | 39.82742 | 51.31931 |
| 17423867 | Cfap206  | cilia and flagella associated protein 206              | 5.673779 | 4.43044  | 3.819967 | 4.33181  | 4.603209 | 4.396727 |
| 17226269 | Cfap221  | cilia and flagella associated protein 221              | 5.48933  | 5.528162 | 5.331125 | 5.48933  | 5.969789 | 6.117024 |
| 17261250 | Cfap36   | cilia and flagella associated protein 36               | 28.29843 | 28.7261  | 29.64342 | 34.60407 | 33.69844 | 29.92792 |
| 17365571 | Cfap43   | cilia and flagella associated protein 43               | 4.427554 | 3.734875 | 3.942963 | 3.703322 | 3.563661 | 3.863531 |
| 17325810 | Cfap44   | cilia and flagella associated protein 44               | 3.757804 | 4.51758  | 5.192359 | 4.647678 | 4.83669  | 4.336617 |
| 17219591 | Cfap45   | cilia and flagella associated protein 45               | 8.832672 | 7.953225 | 8.328519 | 10.02402 | 7.116806 | 11.45948 |
| 17497458 | Cfap46   | cilia and flagella associated protein 46               | 7.282531 | 7.343206 | 7.282531 | 6.384705 | 9.78336  | 6.948926 |
| 17497477 | Cfap46   | cilia and flagella associated protein 46               | 4.547425 | 4.360459 | 4.076978 | 3.782998 | 3.94258  | 4.266432 |
| 17264382 | Cfap52   | cilia and flagella associated protein 52               | 5.114595 | 6.817959 | 5.491499 | 5.295218 | 6.030928 | 6.386786 |
| 17351747 | Cfap53   | cilia and flagella associated protein 53               | 4.095671 | 4.205158 | 3.583725 | 4.275224 | 3.97529  | 3.828449 |
| 17244263 | Cfap54   | cilia and flagella associated protein 54               | 3.873103 | 3.946791 | 3.960026 | 3.856067 | 3.722444 | 4.037662 |
| 17429245 | Cfap57   | cilia and flagella associated protein 57               | 5.60141  | 5.450694 | 5.450694 | 6.152403 | 6.089315 | 6.519901 |
| 17360240 | Cfap58   | cilia and flagella associated protein 58               | 7.874455 | 5.918247 | 7.192633 | 6.733189 | 9.746134 | 7.577962 |
| 17377210 | Cfap61   | cilia and flagella associated protein 61               | 6.428    | 6.382183 | 7.116362 | 6.958276 | 6.516693 | 6.347815 |
| 17445394 | Cfap69   | cilia and flagella associated protein 69               | 4.01461  | 5.062711 | 4.242604 | 3.831289 | 5.22909  | 4.681043 |
| 17303769 | Cfap70   | cilia and flagella associated protein 70               | 4.781986 | 5.651955 | 5.552279 | 4.935102 | 4.511634 | 4.935102 |
| 17452030 | Cfap73   | cilia and flagella associated protein 73               | 8.510713 | 10.57085 | 8.867024 | 9.732834 | 9.732834 | 9.428511 |
| 17422521 | Cfap74   | cilia and flagella associated protein 74               | 5.562024 | 4.571349 | 5.160318 | 4.905601 | 4.193399 | 4.886969 |
| 17422546 | Cfap74   | cilia and flagella associated protein 74               | 4.01461  | 4.826408 | 6.473518 | 4.451063 | 4.665753 | 5.265243 |
| 17383452 | Cfap77   | cilia and flagella associated protein 77               | 7.005461 | 6.461817 | 6.759891 | 6.620591 | 5.628927 | 7.046222 |
| 17500975 | Cfap97   | cilia and flagella associated protein 97               | 38.42491 | 33.77233 | 39.77583 | 40.64652 | 37.46314 | 40.90315 |
| 17436558 | Cfap99   | cilia and flagella associated protein 99               | 6.555746 | 8.906879 | 8.28769  | 10.2112  | 9.092897 | 9.087919 |
| 17424279 | Cntfr    | ciliary neurotrophic factor receptor                   | 7.861747 | 11.34488 | 14.55628 | 11.91403 | 10.12437 | 11.19242 |
| 17432082 | Crocc    | ciliary rootlet coiled-coil, rootletin                 | 11.56834 | 12.2624  | 13.39423 | 12.81081 | 13.78875 | 14.2003  |
| 17215899 | Crocc2   | ciliary rootlet coiled-coil, rootletin family member 2 | 14.22799 | 16.23595 | 13.35835 | 15.7053  | 14.48362 | 14.48362 |
| 17214184 | Catip    | ciliogenesis associated TTC17 interacting protein      | 5.099055 | 5.099055 | 5.099055 | 5.517673 | 4.196481 | 5.099055 |
| 17407594 | Cgn      | cingulin                                               | 40.87736 | 45.02486 | 45.02486 | 32.37504 | 38.18621 | 49.04044 |
| 17407621 | BC021767 | cingulin pseudogene                                    | 17.62975 | 11.807   | 21.19761 | 21.77287 | 20.87769 | 11.83682 |
| 17528692 | Cgnl1    | cingulin-like 1                                        | 82.11136 | 77.33609 | 89.78111 | 74.91642 | 84.00655 | 75.88538 |
| 17407934 | Ciart    | circadian associated repressor of transcription        | 12.10054 | 16.94479 | 14.65397 | 15.08497 | 15.63535 | 19.3067  |
| 17448960 | Clock    | circadian locomotor output cycles kaput                | 268.748  | 231.6945 | 198.9276 | 256.0639 | 180.5557 | 205.0241 |
| 17505197 | Cirh1a   | cirrrosis, autosomal recessive 1A (human)              | 109.5093 | 82.50102 | 83.34883 | 89.69154 | 66.23216 | 69.7161  |
| 17302869 | Clybl    | citrate lyase beta like                                | 145.4601 | 180.0658 | 186.1782 | 161.3724 | 136.1554 | 150.7924 |
| 17238433 | Cs       | citrate synthase                                       | 169.6926 | 177.3628 | 174.1033 | 183.5654 | 156.752  | 169.5645 |
| 17244563 | Csl      | citrate synthase like                                  | 6.310175 | 7.423554 | 6.595262 | 6.569119 | 5.380052 | 4.20927  |
| 17441275 | Cit      | citron                                                 | 5.515608 | 5.882625 | 5.909393 | 5.831189 | 5.974633 | 5.909393 |
| 17512209 | Cmtm1    | CKLF-like MARVEL transmembrane domain containing 1     | 2.996275 | 2.0225   | 2.167272 | 2.182528 | 2.283869 | 3.555223 |
| 17512193 | Cmtm2a   | CKLF-like MARVEL transmembrane domain containing 2A    | 3.255818 | 2.692507 | 2.568365 | 2.854227 | 2.67531  | 2.927684 |
| 17504437 | Cmtm2b   | CKLF-like MARVEL transmembrane domain containing 2B    | 3.194633 | 2.783075 | 2.478436 | 3.086132 | 3.129192 | 2.670278 |
| 17504444 | Cmtm3    | CKLF-like MARVEL transmembrane domain containing 3     | 19.49537 | 19.86215 | 29.07163 | 20.84934 | 18.66987 | 15.43764 |
| 17512221 | Cmtm4    | CKLF-like MARVEL transmembrane domain containing 4     | 62.27063 | 67.1665  | 69.32818 | 60.59513 | 61.29766 | 65.70494 |
| 17300381 | Cmtm5    | CKLF-like MARVEL transmembrane domain containing 5     | 10.58515 | 10.22657 | 10.55665 | 8.325114 | 8.672993 | 9.947059 |
| 17522779 | Cmtm6    | CKLF-like MARVEL transmembrane domain containing 6     | 163.8305 | 145.5701 | 123.82   | 136.0789 | 126.1066 | 108.1005 |
| 17531923 | Cmtm7    | CKLF-like MARVEL transmembrane domain containing 7     | 14.66861 | 18.8752  | 24.05575 | 21.05426 | 19.22831 | 12.11028 |
| 17531932 | Cmtm8    | CKLF-like MARVEL transmembrane domain containing 8     | 91.83677 | 94.03527 | 97.80118 | 85.96098 | 111.028  | 117.7073 |
| 17405446 | Clrn1    | clarin 1                                               | 3.633198 | 4.750305 | 3.843258 | 5.923993 | 4.911794 | 4.385344 |
| 17437241 | Clrn2    | clarin 2                                               | 5.805619 | 7.648729 | 5.7272   | 7.039046 | 6.776076 | 5.00552  |
| 17497320 | Clrn3    | clarin 3                                               | 4.952133 | 5.404046 | 5.063939 | 5.598809 | 5.422319 | 6.292398 |
| 17418592 | Clspn    | claspin                                                | 7.417125 | 5.913655 | 6.008896 | 6.160468 | 5.123324 | 6.680148 |
| 17322842 | Ciita    | class II transactivator                                | 7.056242 | 8.310354 | 7.378308 | 7.188895 | 6.996823 | 7.199017 |
| 17248086 | Clhc1    | clathrin heavy chain linker domain containing 1        | 3.017471 | 2.800453 | 2.963783 | 3.072621 | 2.915534 | 3.108158 |
| 17248728 | Clint1   | clathrin interactor 1                                  | 125.318  | 109.9802 | 132.4276 | 104.4849 | 110.6462 | 96.93932 |
| 17267353 | Cltc     | clathrin, heavy polypeptide (Hc)                       | 316.1685 | 272.7981 | 269.8979 | 241.8737 | 241.5018 | 254.318  |
| 17413511 | Clta     | clathrin, light polypeptide (Lca)                      | 69.94456 | 86.01343 | 84.22753 | 74.21609 | 75.03543 | 77.3377  |
| 17292722 | Cltb     | clathrin, light polypeptide (Lcb)                      | 87.97185 | 79.68907 | 89.02015 | 94.10569 | 85.40212 | 71.50043 |
| 17329479 | Cldn1    | claudin 1                                              | 223.4085 | 134.8629 | 137.3145 | 167.4191 | 189.2789 | 176.5166 |
| 17302711 | Cldn10   | claudin 10                                             | 3.946845 | 3.946845 | 4.056794 | 3.379009 | 4.162499 | 3.987432 |
| 17396652 | Cldn11   | claudin 11                                             | 12.71897 | 11.5673  | 11.64824 | 16.00233 | 12.07943 | 10.33273 |
| 17445370 | Cldn12   | claudin 12                                             | 54.12788 | 53.71935 | 47.0623  | 52.99521 | 52.1574  | 61.96106 |
| 17453492 | Cldn13   | claudin 13                                             | 8.28993  | 7.202561 | 7.003373 | 9.698422 | 11.59853 | 7.799545 |
| 17332290 | Cldn14   | claudin 14                                             | 8.473159 | 9.551187 | 8.406178 | 8.406178 | 8.879694 | 8.207142 |
| 17443486 | Cldn15   | claudin 15                                             | 6.130607 | 5.275106 | 5.233478 | 5.889112 | 4.159874 | 5.073988 |
| 17324513 | Cldn16   | claudin 16                                             | 3.517499 | 3.42872  | 3.651983 | 3.861095 | 3.703887 | 3.735341 |
| 17331824 | Cldn17   | claudin 17                                             | 2.67402  | 2.421784 | 2.67402  | 3.054508 | 2.67402  | 2.636602 |

|          |           |                                                                     |          |          |          |          |          |          |
|----------|-----------|---------------------------------------------------------------------|----------|----------|----------|----------|----------|----------|
| 17530094 | Cldn18    | claudin 18                                                          | 5.618325 | 5.29452  | 5.710432 | 3.967609 | 4.989413 | 4.681887 |
| 17417898 | Cldn19    | claudin 19                                                          | 12.81774 | 17.71488 | 15.7992  | 15.33621 | 15.80369 | 15.84801 |
| 17538134 | Cldn2     | claudin 2                                                           | 8.350601 | 9.689888 | 9.612089 | 8.290965 | 8.71107  | 6.500767 |
| 17332728 | Cldn20    | claudin 20                                                          | 4.558376 | 4.269124 | 4.805911 | 7.505926 | 4.556702 | 4.566535 |
| 17501098 | Cldn22    | claudin 22                                                          | 4.322782 | 3.83836  | 4.205041 | 4.651706 | 3.654135 | 3.927551 |
| 17508779 | Cldn23    | claudin 23                                                          | 10.38069 | 11.6201  | 12.75243 | 10.01305 | 15.00311 | 10.48337 |
| 17501096 | Cldn24    | claudin 24                                                          | 3.533824 | 3.843951 | 3.447331 | 3.516499 | 3.613257 | 4.1718   |
| 17443148 | Cldn3     | claudin 3                                                           | 115.9613 | 118.563  | 123.2744 | 103.2623 | 118.7373 | 120.0158 |
| 17542897 | Cldn34-ps | claudin 34, pseudogene                                              | 2.331874 | 2.095072 | 2.403372 | 2.416317 | 2.584294 | 2.321295 |
| 17538958 | Cldn34a   | claudin 34A                                                         | 2.794713 | 3.410729 | 3.051249 | 3.123189 | 3.1982   | 3.216206 |
| 17545543 | Cldn34b1  | claudin 34B1                                                        | 2.496903 | 2.677469 | 2.677469 | 2.304206 | 3.752547 | 2.937889 |
| 17545588 | Cldn34b2  | claudin 34B2                                                        | 2.665193 | 2.95777  | 2.291401 | 2.5601   | 2.037881 | 2.391126 |
| 17535991 | Cldn34b3  | claudin 34B3                                                        | 2.074509 | 1.968504 | 2.182467 | 1.831163 | 1.876989 | 2.361691 |
| 17535997 | Cldn34b4  | claudin 34B4                                                        | 2.989118 | 2.661944 | 2.416602 | 2.624095 | 2.701012 | 2.919315 |
| 17537379 | Cldn34c1  | claudin 34C1                                                        | 3.338199 | 3.43631  | 3.429718 | 3.208258 | 3.431787 | 3.463162 |
| 17537394 | Cldn34c2  | claudin 34C2                                                        | 4.989655 | 5.061307 | 4.271936 | 5.393755 | 5.544395 | 5.487466 |
| 17537397 | Cldn34c3  | claudin 34C3                                                        | 2.564433 | 1.965001 | 2.527218 | 2.309675 | 2.133112 | 2.967422 |
| 17544352 | Cldn34c4  | claudin 34C4                                                        | 2.675707 | 2.515142 | 2.220585 | 2.263758 | 2.374329 | 2.469844 |
| 17542888 | Cldn34d   | claudin 34D                                                         | 2.438324 | 2.113553 | 2.141839 | 1.95381  | 2.147131 | 2.381681 |
| 17453496 | Cldn4     | claudin 4                                                           | 7.748032 | 8.275463 | 6.368881 | 6.60551  | 7.580694 | 5.382737 |
| 17323755 | Cldn5     | claudin 5                                                           | 7.818598 | 8.598887 | 7.392386 | 8.015875 | 7.150777 | 7.920492 |
| 17334097 | Cldn6     | claudin 6                                                           | 3.524161 | 3.525921 | 3.17602  | 3.714711 | 3.512967 | 4.279642 |
| 17251829 | Cldn7     | claudin 7                                                           | 5.022063 | 4.501263 | 3.877616 | 3.856788 | 7.091545 | 4.482209 |
| 17331828 | Cldn8     | claudin 8                                                           | 3.137836 | 2.718103 | 3.01699  | 3.288204 | 3.06845  | 3.397421 |
| 17341547 | Cldn9     | claudin 9                                                           | 9.380339 | 9.50186  | 9.448531 | 9.251453 | 8.797905 | 10.72689 |
| 17326438 | Cldnd1    | claudin domain containing 1                                         | 87.90784 | 63.75029 | 79.46182 | 75.23906 | 76.11137 | 76.4858  |
| 17477109 | Cldnd2    | claudin domain containing 2                                         | 4.326709 | 4.089657 | 4.792007 | 4.507727 | 5.270756 | 3.674251 |
| 17411697 | Clvs1     | clavesin 1                                                          | 6.595765 | 5.653718 | 4.485815 | 4.813179 | 4.949319 | 6.607067 |
| 17240123 | Clvs2     | clavesin 2                                                          | 2.609548 | 2.34907  | 2.431641 | 2.677506 | 2.398463 | 2.990009 |
| 17493331 | Pcf11     | cleavage and polyadenylation factor subunit homolog (S. cerevisiae) | 39.23991 | 52.1527  | 43.97282 | 41.21735 | 40.33136 | 55.01831 |
| 17318548 | Cpsf1     | cleavage and polyadenylation specific factor 1                      | 77.18775 | 71.52918 | 65.50259 | 75.67894 | 62.20333 | 67.88496 |
| 17278012 | Cpsf2     | cleavage and polyadenylation specific factor 2                      | 36.62533 | 32.61062 | 28.68292 | 43.66726 | 32.93295 | 24.61695 |
| 17422764 | Cpsf3l    | cleavage and polyadenylation specific factor 3-like                 | 28.31314 | 22.24285 | 21.51901 | 23.02405 | 21.73458 | 22.97049 |
| 17444640 | Cpsf4     | cleavage and polyadenylation specific factor 4                      | 38.89573 | 35.66532 | 37.36848 | 37.28853 | 40.46605 | 31.19969 |
| 17271607 | Cpsf4l    | cleavage and polyadenylation specific factor 4-like                 | 16.9836  | 16.27708 | 14.68814 | 24.51393 | 14.8289  | 15.94619 |
| 17245237 | Cpsf6     | cleavage and polyadenylation specific factor 6                      | 69.3104  | 78.13137 | 72.37051 | 69.16115 | 67.62946 | 64.65141 |
| 17357502 | Cpsf7     | cleavage and polyadenylation specific factor 7                      | 33.12687 | 35.95075 | 28.13239 | 28.30412 | 19.75355 | 28.30412 |
| 17274448 | Cpsf3     | cleavage and polyadenylation specificity factor 3                   | 74.14975 | 61.64791 | 64.44292 | 57.02015 | 64.78824 | 64.12922 |
| 17537607 | Cstf2     | cleavage stimulation factor, 3 pre-RNA subunit 2                    | 19.42873 | 17.58837 | 19.40666 | 16.80513 | 18.43416 | 19.09761 |
| 17537630 | Cstf2     | cleavage stimulation factor, 3 pre-RNA subunit 2                    | 3.062691 | 3.062691 | 2.630578 | 2.841849 | 3.298637 | 3.286359 |
| 17358660 | Cstf2t    | cleavage stimulation factor, 3 pre-RNA subunit 2, tau               | 17.3306  | 20.77663 | 13.59251 | 18.49649 | 20.24495 | 18.9628  |
| 17380108 | Cstf1     | cleavage stimulation factor, 3 pre-RNA, subunit 1                   | 33.36099 | 35.13653 | 32.7091  | 50.93657 | 34.7572  | 28.27823 |
| 17373857 | Cstf3     | cleavage stimulation factor, 3 pre-RNA, subunit 3                   | 29.38382 | 20.22854 | 20.22854 | 17.36523 | 20.22854 | 18.87625 |
| 17487346 | Clptm1    | left lip and palate associated transmembrane protein 1              | 213.4124 | 217.8045 | 211.7312 | 209.1987 | 198.6135 | 210.3036 |
| 17216574 | Clasp1    | CLIP associating protein 1                                          | 49.07342 | 40.09249 | 49.57325 | 41.43649 | 37.7436  | 34.33766 |
| 17522651 | Clasp2    | CLIP associating protein 2                                          | 28.45657 | 28.90846 | 30.98719 | 30.61231 | 27.65886 | 30.52776 |
| 17487301 | Clasrp    | CLK4-associating serine/arginine rich protein                       | 16.84735 | 20.61896 | 22.16129 | 24.22559 | 28.82143 | 23.67644 |
| 17277552 | Cipc      | CLOCK interacting protein, circadian                                | 30.03911 | 34.80976 | 34.36957 | 35.46097 | 27.57617 | 35.36328 |
| 17387504 | Clp1      | CLP1, cleavage and polyadenylation factor I subunit                 | 19.42873 | 19.06719 | 19.06719 | 18.18466 | 21.38593 | 19.06719 |
| 17480928 | Clpb      | ClpB caseinolytic peptidase B                                       | 56.47811 | 55.86412 | 61.99113 | 55.02785 | 55.63497 | 56.07089 |
| 17288501 | Clptm1l   | CLPTM1-like                                                         | 159.6889 | 151.0477 | 136.9182 | 140.3728 | 135.9347 | 128.969  |
| 17252767 | Cluh      | clustered mitochondria (cluA/CLU1) homolog                          | 308.3211 | 311.7509 | 286.8137 | 273.3129 | 258.5644 | 273.4134 |
| 17301452 | Clu       | clusterin                                                           | 767.7485 | 749.9705 | 776.8488 | 705.7679 | 779.5998 | 722.438  |
| 17322488 | Cluap1    | clusterin associated protein 1                                      | 12.60383 | 10.07208 | 11.20554 | 12.63646 | 10.05722 | 11.91164 |
| 17505967 | Cmip      | c-Maf inducing protein                                              | 89.8197  | 98.40707 | 132.3368 | 89.88821 | 112.1908 | 85.56625 |
| 17375997 | Mertk     | c-mer proto-oncogene tyrosine kinase                                | 55.26484 | 49.0299  | 59.82929 | 57.08936 | 47.76957 | 59.27123 |
| 17331148 | Cmss1     | cms small ribosomal subunit 1                                       | 11.26722 | 18.49649 | 21.97315 | 21.67305 | 17.25306 | 20.29595 |
| 17250824 | Cdrt4     | CMT1A duplicated region transcript 4                                | 3.839238 | 4.580547 | 4.60918  | 4.271906 | 5.343778 | 5.17443  |
| 17264097 | Cdrt4os1  | CMT1A duplicated region transcript 4, opposite strand 1             | 4.29998  | 3.907592 | 4.386803 | 4.370263 | 4.506977 | 3.89861  |
| 17264094 | Cdrt4os2  | CMT1A duplicated region transcript 4, opposite strand 2             | 4.595048 | 3.073537 | 3.615287 | 4.001192 | 3.949828 | 4.79028  |
| 17418241 | Mycbp     | c-myc binding protein                                               | 61.26198 | 53.47194 | 48.0815  | 54.00159 | 64.05104 | 51.95245 |
| 17355825 | Cndp2     | CNDP dipeptidase 2 (metallopeptidase M20 family)                    | 61.62142 | 54.22589 | 57.08105 | 62.50631 | 82.25207 | 62.44006 |
| 17239023 | Cnksr3    | Cnksr family member 3                                               | 28.64676 | 31.07689 | 29.00581 | 19.30777 | 15.86593 | 26.3858  |
| 17515248 | Carm1     | coactivator-associated arginine methyltransferase 1                 | 44.77092 | 53.10295 | 58.62605 | 48.32507 | 39.96319 | 50.55178 |
| 17513491 | Cotl1     | coactosin-like 1 (Dictyostelium)                                    | 26.31257 | 26.72615 | 30.68348 | 27.51888 | 27.12968 | 28.95398 |
| 17275378 | Coch      | coagulation factor C homolog (Limulus polyphemus)                   | 4.581373 | 4.581373 | 5.13317  | 4.882635 | 4.041974 | 4.581373 |
| 17388234 | F2        | coagulation factor II                                               | 1430.814 | 1330.959 | 1394.943 | 1292.833 | 1661.615 | 1533.614 |
| 17295130 | F2r       | coagulation factor II (thrombin) receptor                           | 104.9916 | 121.0719 | 129.0933 | 108.2933 | 95.90606 | 75.19371 |
| 17295125 | F2r1l     | coagulation factor II (thrombin) receptor-like 1                    | 4.03657  | 4.415693 | 4.792638 | 4.024418 | 4.708867 | 4.453563 |
| 17289281 | F2r12     | coagulation factor II (thrombin) receptor-like 2                    | 4.522373 | 4.51783  | 7.783883 | 5.143641 | 2.796437 | 4.370838 |
| 17505221 | F2r13     | coagulation factor II (thrombin) receptor-like 3                    | 6.566707 | 5.482637 | 7.229771 | 5.250555 | 6.301521 | 10.31856 |
| 17402181 | F3        | coagulation factor III                                              | 10.82519 | 9.234667 | 9.32782  | 11.50086 | 9.523224 | 11.08172 |
| 17535098 | F9        | coagulation factor IX                                               | 695.2847 | 614.0618 | 571.0368 | 620.2689 | 699.0733 | 601.9542 |
| 17218861 | F5        | coagulation factor V                                                | 720.4278 | 667.9147 | 608.41   | 583.4964 | 747.7437 | 690.1805 |
| 17499212 | F7        | coagulation factor VII                                              | 211.1523 | 196.3998 | 216.2431 | 207.9467 | 206.433  | 183.1231 |
| 17542781 | F8        | coagulation factor VIII                                             | 89.35397 | 81.49107 | 115.7253 | 81.46622 | 51.8298  | 60.39428 |
| 17499224 | F10       | coagulation factor X                                                | 447.7843 | 380.7288 | 405.9618 | 377.6589 | 475.1239 | 379.7773 |
| 17509035 | F11       | coagulation factor XI                                               | 108.6587 | 51.24005 | 45.67934 | 102.0965 | 173.3015 | 99.60526 |
| 17292855 | F12       | coagulation factor XII (Hageman factor)                             | 695.4245 | 676.0518 | 626.8081 | 658.345  | 745.8905 | 626.2262 |
| 17291881 | F13a1     | coagulation factor XIII, A1 subunit                                 | 6.275107 | 6.174747 | 5.979356 | 5.407269 | 6.431254 | 5.56106  |
| 17217946 | F13b      | coagulation factor XIII, beta subunit                               | 271.8619 | 223.8875 | 212.6136 | 259.6456 | 320.8844 | 300.9834 |
| 17219448 | Copa      | coatamer protein complex subunit alpha                              | 315.4003 | 267.6975 | 255.3124 | 227.58   | 237.2707 | 215.6428 |
| 17495271 | Copb1     | coatamer protein complex, subunit beta 1                            | 238.5636 | 206.3    | 160.1045 | 178.0946 | 193.378  | 215.3889 |
| 17520638 | Copb2     | coatamer protein complex, subunit beta 2 (beta prime)               | 233.2349 | 213.4997 | 209.4831 | 192.302  | 212.7109 | 198.4264 |

|          |           |                                                    |          |          |          |          |          |          |
|----------|-----------|----------------------------------------------------|----------|----------|----------|----------|----------|----------|
| 17501891 | Cope      | coatomer protein complex, subunit epsilon          | 105.6471 | 98.71723 | 97.85136 | 100.1265 | 117.6706 | 104.3611 |
| 17460572 | Copg1     | coatomer protein complex, subunit gamma 1          | 80.33351 | 74.02753 | 79.44861 | 66.87245 | 62.44266 | 56.63688 |
| 17465557 | Copg2     | coatomer protein complex, subunit gamma 2          | 78.20397 | 61.62014 | 67.32918 | 70.75744 | 61.39503 | 74.74888 |
| 17315558 | Copz1     | coatomer protein complex, subunit zeta 1           | 275.5194 | 281.0221 | 291.2754 | 274.0281 | 293.6492 | 274.5395 |
| 17255663 | Copz2     | coatomer protein complex, subunit zeta 2           | 60.97348 | 72.66355 | 93.50101 | 76.46619 | 68.79062 | 65.62666 |
| 17385879 | Cobl1     | Cobl-like 1                                        | 89.31682 | 96.03244 | 95.7805  | 88.37461 | 101.2944 | 100.6798 |
| 17363644 | Cbwd1     | COBW domain containing 1                           | 19.92793 | 20.89578 | 18.84774 | 21.85119 | 22.36886 | 23.20349 |
| 17256522 | Coasy     | Coenzyme A synthase                                | 57.96178 | 56.502   | 57.74804 | 63.04412 | 62.23999 | 63.91222 |
| 17246100 | Coq10a    | coenzyme Q10 homolog A (yeast)                     | 30.14548 | 32.69436 | 33.56487 | 34.69438 | 38.60083 | 40.5753  |
| 17212874 | Coq10b    | coenzyme Q10 homolog B (S. cerevisiae)             | 64.82148 | 98.59072 | 95.37836 | 65.27642 | 85.3601  | 88.7423  |
| 17450131 | Coq2      | coenzyme Q2 homolog, prenilyltransferase (yeast)   | 37.95558 | 33.08373 | 37.94637 | 36.94021 | 37.96821 | 41.6594  |
| 17412191 | Coq3      | coenzyme Q3 homolog, methyltransferase (yeast)     | 50.54302 | 49.12686 | 51.37484 | 55.67316 | 55.17183 | 64.23599 |
| 17368896 | Coq4      | coenzyme Q4 homolog (yeast)                        | 41.36016 | 43.37825 | 44.41423 | 45.2216  | 37.3281  | 43.41946 |
| 17441105 | Coq5      | coenzyme Q5 homolog, methyltransferase (yeast)     | 211.0235 | 169.8856 | 176.3099 | 173.5154 | 116.7938 | 131.3898 |
| 17277232 | Coq6      | coenzyme Q6 homolog (yeast)                        | 20.15785 | 19.42873 | 19.42873 | 19.42873 | 19.39362 | 19.42873 |
| 17504146 | Coq9      | coenzyme Q9 homolog (yeast)                        | 59.65082 | 66.97682 | 64.59721 | 62.95242 | 57.74924 | 62.71028 |
| 17356472 | Cfl1      | cofilin 1, non-muscle                              | 117.5556 | 174.6896 | 187.7267 | 130.9589 | 150.3499 | 137.5002 |
| 17281142 | Cfl2      | cofilin 2, muscle                                  | 244.5338 | 188.2088 | 198.4071 | 203.5614 | 207.1842 | 237.6064 |
| 17353054 | Ccdc178   | coiled coil domain containing 178                  | 3.187179 | 3.334961 | 3.417923 | 3.703322 | 3.417923 | 3.102626 |
| 17430475 | Ccdc28b   | coiled coil domain containing 28B                  | 11.80888 | 9.628159 | 11.75213 | 12.86483 | 11.65696 | 10.50701 |
| 17248019 | Ccdc88a   | coiled coil domain containing 88A                  | 15.10569 | 12.89956 | 12.99919 | 12.99919 | 12.99919 | 14.41671 |
| 17337169 | Cchcr1    | coiled-coil alpha-helical rod protein 1            | 8.917319 | 12.27371 | 12.35557 | 11.11387 | 8.297519 | 10.61226 |
| 17511038 | Cc2d1a    | coiled-coil and C2 domain containing 1A            | 26.36734 | 25.1661  | 24.22458 | 27.5206  | 30.14987 | 26.21644 |
| 17416714 | Cc2d1b    | coiled-coil and C2 domain containing 1B            | 23.43577 | 24.79161 | 27.81151 | 22.47953 | 28.13239 | 23.75781 |
| 17437156 | Cc2d2a    | coiled-coil and C2 domain containing 2A            | 6.657036 | 9.231531 | 8.818663 | 7.917583 | 7.294606 | 11.66052 |
| 17359368 | Cc2d2b    | coiled-coil and C2 domain containing 2B            | 5.507547 | 4.72456  | 6.055936 | 6.171709 | 6.227875 | 5.635525 |
| 17511912 | Ccdc102a  | coiled-coil domain containing 102A                 | 10.99031 | 13.58017 | 13.64377 | 13.86908 | 16.98112 | 13.48001 |
| 17242558 | Ccdc105   | coiled-coil domain containing 105                  | 4.25288  | 4.399013 | 4.424824 | 4.755543 | 4.690267 | 4.157165 |
| 17473463 | Ccdc106   | coiled-coil domain containing 106                  | 8.963921 | 9.019641 | 7.162186 | 9.322779 | 8.83702  | 7.7882   |
| 17413339 | Ccdc107   | coiled-coil domain containing 107                  | 38.48142 | 36.10358 | 40.04638 | 41.50347 | 47.4567  | 47.15798 |
| 17224397 | Ccdc108   | coiled-coil domain containing 108                  | 7.152909 | 7.042463 | 7.584741 | 5.677871 | 6.741876 | 6.349663 |
| 17410332 | Ccdc109b  | coiled-coil domain containing 109B                 | 7.682575 | 7.483743 | 7.815835 | 8.019098 | 8.355812 | 8.135381 |
| 17500932 | Ccdc110   | coiled-coil domain containing 110                  | 2.784735 | 2.842243 | 2.6341   | 3.124099 | 2.792021 | 2.775678 |
| 17354244 | Ccdc112   | coiled-coil domain containing 112                  | 5.928101 | 5.237506 | 4.72515  | 5.198985 | 3.772916 | 4.757917 |
| 17504309 | Ccdc113   | coiled-coil domain containing 113                  | 5.191747 | 4.801449 | 5.582379 | 5.491651 | 5.234276 | 4.722268 |
| 17478058 | Ccdc114   | coiled-coil domain containing 114                  | 5.046664 | 6.164184 | 7.118681 | 6.295801 | 5.957512 | 7.106061 |
| 17222072 | Ccdc115   | coiled-coil domain containing 115                  | 20.93101 | 14.8708  | 13.74305 | 15.22732 | 12.84914 | 13.9291  |
| 17328631 | Ccdc116   | coiled-coil domain containing 116                  | 6.171709 | 5.197832 | 6.171709 | 6.772789 | 6.171709 | 7.170233 |
| 17260167 | Ccdc117   | coiled-coil domain containing 117                  | 81.1568  | 54.12375 | 53.82782 | 53.82782 | 53.82782 | 64.33313 |
| 17522430 | Ccdc12    | coiled-coil domain containing 12                   | 15.97451 | 23.9093  | 17.49535 | 19.29988 | 22.18404 | 19.60242 |
| 17539898 | Ccdc120   | coiled-coil domain containing 120                  | 10.38385 | 11.23237 | 10.88749 | 9.960858 | 10.77585 | 8.855722 |
| 17230546 | Ccdc121   | coiled-coil domain containing 121                  | 7.375496 | 5.690124 | 5.73431  | 4.618614 | 6.435401 | 4.461535 |
| 17302102 | Ccdc122   | coiled-coil domain containing 122                  | 14.24032 | 14.24032 | 13.39423 | 13.37697 | 16.38325 | 12.09526 |
| 17510223 | Ccdc124   | coiled-coil domain containing 124                  | 47.62773 | 45.62776 | 46.167   | 48.16122 | 48.215   | 43.57564 |
| 17289497 | Ccdc125   | coiled-coil domain containing 125                  | 29.73706 | 31.31973 | 37.09596 | 33.61889 | 31.89437 | 23.49432 |
| 17458465 | Ccdc126   | coiled-coil domain containing 126                  | 8.827959 | 8.371174 | 8.468521 | 7.815131 | 8.513309 | 8.78456  |
| 17288641 | Ccdc127   | coiled-coil domain containing 127                  | 37.1706  | 36.184   | 32.93432 | 36.184   | 38.89573 | 35.36107 |
| 17458866 | Ccdc129   | coiled-coil domain containing 129                  | 4.424088 | 3.271291 | 3.454364 | 3.703322 | 2.911999 | 3.674047 |
| 17532382 | Ccdc13    | coiled-coil domain containing 13                   | 14.2861  | 14.68855 | 14.68855 | 18.91803 | 14.68855 | 13.51622 |
| 17511112 | Ccdc130   | coiled-coil domain containing 130                  | 24.60381 | 22.22436 | 28.17942 | 27.44821 | 25.1403  | 24.68769 |
| 17313495 | Ccdc134   | coiled-coil domain containing 134                  | 11.6036  | 10.98178 | 9.325041 | 11.01372 | 11.56746 | 10.98178 |
| 17456604 | Ccdc136   | coiled-coil domain containing 136                  | 6.451122 | 6.478546 | 6.331205 | 7.044074 | 6.053082 | 6.369632 |
| 17259331 | Ccdc137   | coiled-coil domain containing 137                  | 22.10315 | 23.03443 | 24.62787 | 28.09361 | 17.15753 | 23.44389 |
| 17233489 | Ccdc138   | coiled-coil domain containing 138                  | 7.44912  | 7.435347 | 7.437151 | 8.3911   | 9.738638 | 9.409643 |
| 17325144 | Ccdc14    | coiled-coil domain containing 14                   | 5.829532 | 8.477272 | 6.675704 | 8.847194 | 8.247804 | 8.696712 |
| 17387131 | Ccdc141   | coiled-coil domain containing 141                  | 23.26404 | 32.36943 | 41.77188 | 32.84154 | 33.99475 | 30.48125 |
| 17459936 | Ccdc142   | coiled-coil domain containing 142                  | 13.07093 | 10.58332 | 10.83247 | 11.78043 | 11.7378  | 15.5462  |
| 17468095 | Ccdc142os | coiled-coil domain containing 142, opposite strand | 6.063034 | 7.76061  | 7.479494 | 6.966094 | 9.310251 | 8.242831 |
| 17404772 | Ccdc144b  | coiled-coil domain containing 144B                 | 2.261892 | 2.488903 | 2.893288 | 2.734733 | 2.3797   | 2.813001 |
| 17445809 | Ccdc146   | coiled-coil domain containing 146                  | 4.186574 | 3.553424 | 3.855799 | 3.639146 | 4.43591  | 4.045197 |
| 17385455 | Ccdc148   | coiled-coil domain containing 148                  | 4.378965 | 5.142322 | 4.702442 | 5.080428 | 5.573216 | 5.008088 |
| 17448050 | Ccdc149   | coiled-coil domain containing 149                  | 13.13533 | 17.33481 | 12.54717 | 14.31296 | 14.31296 | 11.00548 |
| 17525599 | Ccdc15    | coiled-coil domain containing 15                   | 19.77026 | 25.41732 | 23.12498 | 21.58594 | 26.58683 | 32.87525 |
| 17212840 | Ccdc150   | coiled-coil domain containing 150                  | 4.417346 | 3.928068 | 4.042506 | 4.901794 | 3.642477 | 4.683607 |
| 17524879 | Ccdc151   | coiled-coil domain containing 151                  | 4.40759  | 3.960493 | 4.095501 | 4.265811 | 3.714685 | 4.479103 |
| 17315627 | Ccdc152   | coiled-coil domain containing 152                  | 8.737799 | 8.622941 | 5.634509 | 6.446294 | 7.138693 | 7.635962 |
| 17516538 | Ccdc153   | coiled-coil domain containing 153                  | 21.51171 | 22.62789 | 19.62077 | 27.42786 | 14.36693 | 21.38282 |
| 17334576 | Ccdc154   | coiled-coil domain containing 154                  | 4.626785 | 5.459126 | 5.663995 | 6.208264 | 6.015898 | 5.663485 |
| 17490673 | Ccdc155   | coiled-coil domain containing 155                  | 6.82666  | 7.400794 | 6.82666  | 7.541544 | 5.767636 | 6.842673 |
| 17259956 | Ccdc157   | coiled-coil domain containing 157                  | 10.77174 | 12.53213 | 12.42445 | 13.22724 | 9.71127  | 10.21141 |
| 17449763 | Ccdc158   | coiled-coil domain containing 158                  | 4.452791 | 3.698474 | 3.629523 | 3.816182 | 3.31898  | 3.818537 |
| 17515344 | Ccdc159   | coiled-coil domain containing 159                  | 18.87036 | 23.36958 | 36.02409 | 21.8941  | 18.88606 | 17.74782 |
| 17534702 | Ccdc160   | coiled-coil domain containing 160                  | 5.805297 | 5.791953 | 7.594474 | 6.513577 | 9.462819 | 6.397685 |
| 17240444 | Ccdc162   | coiled-coil domain containing 162                  | 7.486181 | 7.252558 | 7.346057 | 8.92109  | 6.96677  | 9.011892 |
| 17240467 | Ccdc162   | coiled-coil domain containing 162                  | 4.058059 | 3.070109 | 2.726424 | 3.62648  | 4.452051 | 4.110945 |
| 17417492 | Ccdc163   | coiled-coil domain containing 163                  | 5.336597 | 7.460953 | 6.1315   | 8.198671 | 7.536058 | 7.622953 |
| 17318245 | Ccdc166   | coiled-coil domain containing 166                  | 6.603313 | 9.69318  | 7.317039 | 9.179019 | 9.908592 | 6.947626 |
| 17343079 | Ccdc167   | coiled-coil domain containing 167                  | 19.52946 | 25.31271 | 24.92169 | 26.36112 | 20.48279 | 27.69435 |
| 17222677 | Ccdc168   | coiled-coil domain containing 168                  | 2.840707 | 2.461589 | 2.392833 | 3.077908 | 2.802336 | 2.425328 |
| 17397679 | Ccdc169   | coiled-coil domain containing 169                  | 4.35629  | 4.489796 | 4.134778 | 4.347723 | 4.506102 | 4.015585 |
| 17417456 | Ccdc17    | coiled-coil domain containing 17                   | 16.97806 | 16.3268  | 18.51612 | 18.3532  | 13.94659 | 13.11549 |
| 17231443 | Ccdc170   | coiled-coil domain containing 170                  | 9.179337 | 12.93538 | 10.95236 | 11.26363 | 10.50046 | 9.42544  |
| 17415035 | Ccdc171   | coiled-coil domain containing 171                  | 17.40452 | 17.05485 | 16.92894 | 14.96531 | 13.73276 | 19.14134 |
| 17360735 | Ccdc172   | coiled-coil domain containing 172                  | 3.117652 | 2.846048 | 2.602179 | 3.12109  | 3.031055 | 3.742131 |

|          |          |                                                                                 |          |          |          |          |          |          |
|----------|----------|---------------------------------------------------------------------------------|----------|----------|----------|----------|----------|----------|
| 17386315 | Ccdc173  | coiled-coil domain containing 173                                               | 2.499605 | 2.679734 | 2.919234 | 3.27272  | 2.882998 | 2.962202 |
| 17460958 | Ccdc174  | coiled-coil domain containing 174                                               | 15.88761 | 16.83206 | 16.83206 | 13.96981 | 17.12414 | 17.83612 |
| 17281801 | Ccdc175  | coiled-coil domain containing 175                                               | 2.521094 | 2.420223 | 2.610362 | 2.610362 | 3.06023  | 2.646068 |
| 17282284 | Ccdc177  | coiled-coil domain containing 177                                               | 5.39742  | 6.397419 | 5.578975 | 5.723906 | 5.191171 | 5.234711 |
| 17440164 | Ccdc18   | coiled-coil domain containing 18                                                | 2.960088 | 3.309492 | 3.546092 | 3.071152 | 3.538284 | 3.212241 |
| 17413706 | Ccdc180  | coiled-coil domain containing 180                                               | 4.666206 | 5.086418 | 4.847329 | 4.726132 | 4.956735 | 5.241755 |
| 17218899 | Ccdc181  | coiled-coil domain containing 181                                               | 12.72117 | 13.4633  | 11.91949 | 12.72779 | 11.53607 | 13.89294 |
| 17254970 | Ccdc182  | coiled-coil domain containing 182                                               | 6.23025  | 4.7664   | 5.120306 | 4.681595 | 5.922105 | 4.886969 |
| 17382709 | Ccdc183  | coiled-coil domain containing 183                                               | 7.996119 | 8.283382 | 7.816539 | 8.467112 | 10.64298 | 9.830399 |
| 17314604 | Ccdc184  | coiled-coil domain containing 184                                               | 8.380986 | 8.955786 | 8.478271 | 9.925158 | 8.647242 | 9.992391 |
| 17230636 | Ccdc185  | coiled-coil domain containing 185                                               | 6.992896 | 6.29663  | 4.883888 | 6.76758  | 5.9955   | 6.152446 |
| 17365863 | Ccdc186  | coiled-coil domain containing 186                                               | 38.61689 | 30.75182 | 28.12361 | 41.63197 | 32.68009 | 25.6076  |
| 17382885 | Ccdc187  | coiled-coil domain containing 187                                               | 3.550372 | 3.234359 | 3.23649  | 3.264586 | 4.005466 | 3.860506 |
| 17382900 | Ccdc187  | coiled-coil domain containing 187                                               | 5.260427 | 4.979221 | 4.998274 | 6.753007 | 5.530309 | 6.039671 |
| 17496715 | Ccdc189  | coiled-coil domain containing 189                                               | 8.854249 | 8.438345 | 6.62408  | 6.898439 | 6.153469 | 7.66226  |
| 17219148 | Ccdc190  | coiled-coil domain containing 190                                               | 5.777879 | 5.754378 | 5.421041 | 5.329869 | 7.005558 | 5.582456 |
| 17325736 | Ccdc191  | coiled-coil domain containing 191                                               | 15.2893  | 15.95824 | 16.08507 | 17.20064 | 15.95824 | 15.95824 |
| 17539854 | Ccdc22   | coiled-coil domain containing 22                                                | 20.75504 | 26.77361 | 24.4603  | 32.86705 | 26.36112 | 32.35664 |
| 17428910 | Ccdc24   | coiled-coil domain containing 24                                                | 9.241583 | 8.316981 | 8.674677 | 8.291482 | 7.697767 | 11.49194 |
| 17301440 | Ccdc25   | coiled-coil domain containing 25                                                | 51.31754 | 44.82712 | 28.56685 | 47.35779 | 45.58193 | 40.47502 |
| 17433567 | Ccdc27   | coiled-coil domain containing 27                                                | 5.6489   | 4.316195 | 5.680114 | 6.106095 | 6.810969 | 5.680114 |
| 17239528 | Ccdc28a  | coiled-coil domain containing 28A                                               | 17.67073 | 26.94956 | 25.61772 | 26.85912 | 23.93583 | 27.98846 |
| 17366536 | Ccdc3    | coiled-coil domain containing 3                                                 | 15.83495 | 22.80455 | 21.99235 | 16.23595 | 14.21981 | 16.56608 |
| 17429383 | Ccdc30   | coiled-coil domain containing 30                                                | 5.758647 | 5.327726 | 5.758089 | 5.679957 | 5.669769 | 5.032726 |
| 17389795 | Ccdc32   | coiled-coil domain containing 32                                                | 21.27386 | 24.34275 | 24.58046 | 21.28979 | 32.94734 | 29.11317 |
| 17527630 | Ccdc33   | coiled-coil domain containing 33                                                | 9.800056 | 9.702456 | 8.715963 | 11.05242 | 9.71504  | 10.78183 |
| 17374121 | Ccdc34   | coiled-coil domain containing 34                                                | 13.4371  | 18.20837 | 13.29793 | 15.63991 | 18.92944 | 14.85565 |
| 17389138 | Ccdc34os | coiled-coil domain containing 34, opposite strand                               | 2.603694 | 2.529777 | 2.912625 | 2.701424 | 2.656304 | 2.361331 |
| 17531183 | Ccdc36   | coiled-coil domain containing 36                                                | 5.903661 | 5.293897 | 5.644556 | 6.703061 | 6.030928 | 6.568391 |
| 17236577 | Ccdc38   | coiled-coil domain containing 38                                                | 4.218383 | 4.034976 | 4.379937 | 4.334363 | 5.061939 | 4.699151 |
| 17404654 | Ccdc39   | coiled-coil domain containing 39                                                | 4.52736  | 4.075198 | 3.86072  | 5.013889 | 3.292264 | 4.172668 |
| 17258964 | Ccdc40   | coiled-coil domain containing 40                                                | 10.98125 | 11.47124 | 11.74032 | 10.76794 | 9.696943 | 13.86629 |
| 17251358 | Ccdc42   | coiled-coil domain containing 42                                                | 6.853496 | 10.65316 | 10.41167 | 7.455577 | 8.437409 | 8.956096 |
| 17264421 | Ccdc42os | coiled-coil domain containing 42, opposite strand [Source:MGI Symbol;Acc:MGI:19 | 3.015715 | 2.963824 | 2.963824 | 3.242598 | 2.963824 | 3.161042 |
| 17270305 | Ccdc43   | coiled-coil domain containing 43                                                | 25.49178 | 19.6239  | 25.11661 | 23.68743 | 21.18968 | 28.62969 |
| 17270761 | Ccdc47   | coiled-coil domain containing 47                                                | 62.7068  | 55.58524 | 51.60969 | 47.60397 | 46.46621 | 47.16517 |
| 17324553 | Ccdc50   | coiled-coil domain containing 50                                                | 66.89563 | 79.0942  | 73.12993 | 62.55442 | 76.45241 | 73.39043 |
| 17522161 | Ccdc51   | coiled-coil domain containing 51                                                | 6.893181 | 7.184212 | 6.265067 | 8.410549 | 5.60009  | 6.473743 |
| 17236327 | Ccdc53   | coiled-coil domain containing 53                                                | 58.6545  | 56.07322 | 58.30469 | 57.78648 | 57.78648 | 47.93741 |
| 17330901 | Ccdc54   | coiled-coil domain containing 54                                                | 5.755535 | 7.910616 | 6.220411 | 6.171709 | 4.617174 | 5.306203 |
| 17273394 | Ccdc57   | coiled-coil domain containing 57                                                | 8.331175 | 9.732834 | 9.650676 | 9.84622  | 9.628226 | 10.38357 |
| 17325312 | Ccdc58   | coiled-coil domain containing 58                                                | 34.25517 | 46.18076 | 41.68857 | 44.49619 | 45.93685 | 49.89454 |
| 17237084 | Ccdc59   | coiled-coil domain containing 59                                                | 20.79335 | 18.26007 | 19.605   | 19.605   | 19.48389 | 20.46576 |
| 17234116 | Ccdc6    | coiled-coil domain containing 6                                                 | 70.95439 | 77.3747  | 76.91857 | 78.79379 | 72.16813 | 63.9725  |
| 17451791 | Ccdc60   | coiled-coil domain containing 60                                                | 5.326545 | 5.752942 | 5.169125 | 5.927854 | 6.346935 | 5.774756 |
| 17487120 | Ccdc61   | coiled-coil domain containing 61                                                | 14.84577 | 15.14416 | 14.84577 | 13.97213 | 14.23924 | 17.26681 |
| 17442413 | Ccdc62   | coiled-coil domain containing 62                                                | 4.650868 | 4.100216 | 4.590846 | 4.524568 | 4.743954 | 4.185355 |
| 17452343 | Ccdc63   | coiled-coil domain containing 63                                                | 8.122816 | 7.889916 | 8.531149 | 8.467112 | 8.467112 | 8.467112 |
| 17451748 | Ccdc64   | coiled-coil domain containing 64                                                | 6.979772 | 7.219856 | 7.698994 | 7.331813 | 8.238148 | 9.297482 |
| 17334080 | Ccdc64b  | coiled-coil domain containing 64B                                               | 10.36336 | 11.11842 | 9.118332 | 10.82871 | 9.723731 | 11.24966 |
| 17314653 | Ccdc65   | coiled-coil domain containing 65                                                | 3.33473  | 4.871344 | 4.921199 | 4.093429 | 4.315597 | 3.626455 |
| 17304273 | Ccdc66   | coiled-coil domain containing 66                                                | 22.03416 | 18.29009 | 23.04098 | 25.64454 | 18.15733 | 21.36267 |
| 17524211 | Ccdc67   | coiled-coil domain containing 67                                                | 4.098369 | 6.975129 | 7.370896 | 5.890785 | 4.660646 | 8.116569 |
| 17351634 | Ccdc68   | coiled-coil domain containing 68                                                | 5.63615  | 4.44576  | 5.044391 | 5.685944 | 5.159031 | 5.319719 |
| 17262915 | Ccdc69   | coiled-coil domain containing 69                                                | 11.36858 | 10.21084 | 10.72548 | 10.72548 | 12.02979 | 11.07358 |
| 17499843 | Ccdc70   | coiled-coil domain containing 70                                                | 5.55817  | 5.06415  | 3.811001 | 4.555344 | 4.682633 | 5.56106  |
| 17521722 | Ccdc71   | coiled-coil domain containing 71                                                | 21.44189 | 22.25643 | 25.50185 | 22.15991 | 20.23905 | 22.4361  |
| 17274868 | Ccdc71l  | coiled-coil domain containing 71 like                                           | 22.98722 | 21.4764  | 22.23299 | 21.91581 | 22.98722 | 23.43398 |
| 17373887 | Ccdc73   | coiled-coil domain containing 73                                                | 3.850832 | 4.172378 | 3.291443 | 4.172378 | 4.795961 | 4.246546 |
| 17323576 | Ccdc74a  | coiled-coil domain containing 74A                                               | 3.767506 | 4.733673 | 4.03783  | 4.049209 | 4.479041 | 4.296584 |
| 17470417 | Ccdc77   | coiled-coil domain containing 77                                                | 15.37101 | 14.60287 | 15.44802 | 15.37101 | 14.46897 | 15.37101 |
| 17334764 | Ccdc78   | coiled-coil domain containing 78                                                | 10.41665 | 11.93685 | 10.41665 | 10.41665 | 10.41665 | 10.52932 |
| 17512245 | Ccdc79   | coiled-coil domain containing 79                                                | 2.769528 | 2.719271 | 2.719271 | 2.733994 | 3.263862 | 2.854741 |
| 17514300 | Ccdc7a   | coiled-coil domain containing 7A                                                | 2.411482 | 2.227399 | 3.152158 | 2.968348 | 2.996794 | 3.623666 |
| 17507038 | Ccdc7b   | coiled-coil domain containing 7B                                                | 3.243564 | 2.79859  | 1.989202 | 2.615216 | 3.636549 | 2.624222 |
| 17474231 | Ccdc8    | coiled-coil domain containing 8                                                 | 8.200944 | 7.566363 | 9.926396 | 9.250235 | 8.24386  | 7.192085 |
| 17325904 | Ccdc80   | coiled-coil domain containing 80                                                | 26.9016  | 33.84029 | 32.25051 | 29.61795 | 28.18782 | 27.69551 |
| 17493220 | Ccdc81   | coiled-coil domain containing 81                                                | 4.351009 | 5.035657 | 3.986907 | 3.791661 | 4.034305 | 3.576529 |
| 17514666 | Ccdc82   | coiled-coil domain containing 82                                                | 5.014897 | 5.203383 | 5.338891 | 5.522456 | 5.048903 | 5.926786 |
| 17493275 | Ccdc83   | coiled-coil domain containing 83                                                | 5.706911 | 5.512512 | 5.918986 | 6.512539 | 6.283638 | 5.905994 |
| 17526274 | Ccdc84   | coiled-coil domain containing 84                                                | 19.21339 | 22.46785 | 21.82228 | 16.37531 | 20.69485 | 20.70533 |
| 17261233 | Ccdc85a  | coiled-coil domain containing 85A                                               | 4.801649 | 5.227749 | 4.421972 | 4.801649 | 4.801649 | 4.938661 |
| 17361600 | Ccdc85b  | coiled-coil domain containing 85B                                               | 11.45178 | 12.84638 | 10.92234 | 10.00272 | 11.72755 | 10.33302 |
| 17283897 | Ccdc85c  | coiled-coil domain containing 85C                                               | 20.88029 | 18.58324 | 24.02492 | 26.89787 | 18.24362 | 24.57637 |
| 17362831 | Ccdc86   | coiled-coil domain containing 86                                                | 11.37228 | 9.787633 | 8.534875 | 9.939891 | 11.33341 | 10.90199 |
| 17356284 | Ccdc87   | coiled-coil domain containing 87                                                | 4.608221 | 4.047244 | 3.630228 | 3.708819 | 3.836525 | 3.263636 |
| 17362070 | Ccdc88b  | coiled-coil domain containing 88B                                               | 17.87176 | 14.00937 | 14.27768 | 12.78526 | 16.09845 | 16.6039  |
| 17283303 | Ccdc88c  | coiled-coil domain containing 88C                                               | 15.65238 | 18.96516 | 22.05494 | 15.38359 | 14.8098  | 18.74872 |
| 17480127 | Ccdc89   | coiled-coil domain containing 89                                                | 3.174809 | 4.176198 | 3.592007 | 3.194765 | 2.618626 | 3.195718 |
| 17486874 | Ccdc9    | coiled-coil domain containing 9                                                 | 11.03611 | 10.09823 | 10.04399 | 10.78347 | 9.698422 | 9.289751 |
| 17480192 | Ccdc90b  | coiled-coil domain containing 90B                                               | 13.04712 | 16.05188 | 17.35609 | 16.56504 | 17.05993 | 19.86725 |
| 17464429 | Ccdc91   | coiled-coil domain containing 91                                                | 27.52728 | 34.74395 | 30.16701 | 32.28406 | 20.76022 | 29.16043 |
| 17452889 | Ccdc92   | coiled-coil domain containing 92                                                | 11.65729 | 11.69946 | 12.77348 | 11.51626 | 10.97394 | 11.45361 |
| 17216690 | Ccdc93   | coiled-coil domain containing 93                                                | 26.76564 | 24.24625 | 22.42662 | 18.96306 | 18.04241 | 20.04069 |

|          |              |                                                                                     |          |          |          |          |          |          |
|----------|--------------|-------------------------------------------------------------------------------------|----------|----------|----------|----------|----------|----------|
| 17338650 | Ccdc94       | coiled-coil domain containing 94                                                    | 48.1442  | 47.76129 | 46.50681 | 49.20728 | 55.17336 | 50.01296 |
| 17436938 | Ccdc96       | coiled-coil domain containing 96                                                    | 14.4789  | 9.821545 | 7.667254 | 9.821545 | 8.42537  | 9.821545 |
| 17488001 | Ccdc97       | coiled-coil domain containing 97                                                    | 35.2485  | 29.5468  | 28.78908 | 29.1382  | 29.60625 | 24.80278 |
| 17236832 | Ccer1        | coiled-coil glutamate-rich protein 1                                                | 9.285696 | 9.366954 | 9.422762 | 11.37149 | 12.68587 | 9.488237 |
| 17475916 | Ccer2        | coiled-coil glutamate-rich protein 2                                                | 6.362395 | 5.172637 | 10.66757 | 10.31263 | 8.956903 | 7.660932 |
| 17459108 | Ccser1       | coiled-coil serine rich 1                                                           | 5.300212 | 5.377032 | 4.979773 | 4.719225 | 4.990035 | 5.891561 |
| 17305116 | Ccser2       | coiled-coil serine rich 2                                                           | 136.4331 | 147.1088 | 175.973  | 134.4765 | 127.8333 | 124.8074 |
| 17297497 | Chchd1       | coiled-coil-helix-coiled-coil-helix domain containing 1                             | 31.19537 | 29.33884 | 28.1929  | 36.06206 | 36.46347 | 44.52982 |
| 17234436 | Chchd10      | coiled-coil-helix-coiled-coil-helix domain containing 10                            | 1070.612 | 1145.538 | 1289.736 | 1262.38  | 1027.79  | 1054.315 |
| 17453154 | Chchd2       | coiled-coil-helix-coiled-coil-helix domain containing 2                             | 33.38296 | 40.4927  | 38.78186 | 42.06971 | 32.46223 | 39.95378 |
| 17465671 | Chchd3       | coiled-coil-helix-coiled-coil-helix domain containing 3                             | 96.4915  | 90.76096 | 91.44485 | 90.76096 | 76.52186 | 101.4743 |
| 17469030 | Chchd4       | coiled-coil-helix-coiled-coil-helix domain containing 4                             | 21.50082 | 26.00397 | 25.15913 | 22.7758  | 22.2279  | 22.2279  |
| 17376119 | Chchd5       | coiled-coil-helix-coiled-coil-helix domain containing 5                             | 21.09487 | 21.09487 | 20.65974 | 25.59287 | 17.51161 | 19.62023 |
| 17468865 | Chchd6       | coiled-coil-helix-coiled-coil-helix domain containing 6                             | 14.57749 | 16.92789 | 19.3732  | 17.32004 | 13.6075  | 14.77903 |
| 17411547 | Chchd7       | coiled-coil-helix-coiled-coil-helix domain containing 7                             | 15.40333 | 14.77873 | 14.86111 | 16.81807 | 17.84008 | 15.05457 |
| 17255008 | Coil         | coilin                                                                              | 5.53564  | 7.364155 | 5.909393 | 10.27403 | 9.224943 | 7.951075 |
| 17235227 | Cirbp        | cold inducible RNA binding protein                                                  | 11.47037 | 14.41381 | 16.72437 | 16.35273 | 16.82728 | 16.58503 |
| 17313418 | Csdc2        | cold shock domain containing C2, RNA binding                                        | 9.720699 | 11.53415 | 13.11331 | 11.72503 | 11.52081 | 11.72471 |
| 17401094 | Csde1        | cold shock domain containing E1, RNA binding                                        | 417.5919 | 426.9017 | 388.6533 | 399.5715 | 403.2163 | 419.6637 |
| 17342890 | Clps         | colipase, pancreatic                                                                | 5.658462 | 4.72705  | 4.808277 | 5.56106  | 5.56106  | 5.56106  |
| 17335352 | Clpsl2       | colipase-like 2                                                                     | 5.767915 | 6.904227 | 6.677092 | 8.309433 | 6.701899 | 6.867333 |
| 17268177 | LOC102640586 | collagen alpha-1(II) chain-like                                                     | 11.36385 | 9.341084 | 7.08953  | 7.204608 | 9.748904 | 8.854188 |
| 17355113 | Ccbe1        | collagen and calcium binding EGF domains 1                                          | 7.541544 | 8.402275 | 11.56746 | 9.026145 | 8.608668 | 9.052649 |
| 17502280 | Colgalt1     | collagen beta(1-O)galactosyltransferase 1                                           | 83.76932 | 98.03806 | 88.91285 | 69.91306 | 84.4368  | 84.41983 |
| 17218233 | Colgalt2     | collagen beta(1-O)galactosyltransferase 2                                           | 5.177731 | 5.46064  | 5.061447 | 5.985119 | 4.718734 | 5.846852 |
| 17311191 | Cthrc1       | collagen triple helix repeat containing 1                                           | 11.29005 | 12.32845 | 10.27104 | 13.52709 | 13.3986  | 8.472748 |
| 17255260 | Col1a1       | collagen, type I, alpha 1                                                           | 29.73355 | 46.33531 | 49.74777 | 36.69089 | 33.58348 | 34.38601 |
| 17455801 | Col1a2       | collagen, type I, alpha 2                                                           | 24.52396 | 30.33833 | 34.29461 | 27.52213 | 23.35387 | 27.19972 |
| 17321094 | Col2a1       | collagen, type II, alpha 1                                                          | 11.86319 | 12.63006 | 11.6505  | 12.16589 | 12.91701 | 11.56521 |
| 17212461 | Col3a1       | collagen, type III, alpha 1                                                         | 32.14071 | 39.7921  | 45.26864 | 37.22784 | 37.30249 | 41.22193 |
| 17507377 | Col4a1       | collagen, type IV, alpha 1                                                          | 36.15066 | 36.60604 | 37.69653 | 37.12477 | 34.74877 | 35.28761 |
| 17498962 | Col4a2       | collagen, type IV, alpha 2                                                          | 28.18841 | 28.84341 | 32.52957 | 26.36112 | 33.28592 | 27.39081 |
| 17214771 | Col4a3       | collagen, type IV, alpha 3                                                          | 5.746446 | 6.418917 | 6.759797 | 7.921315 | 6.747813 | 6.307857 |
| 17289304 | Col4a3bp     | collagen, type IV, alpha 3 (Goodpasture antigen) binding protein                    | 94.02419 | 95.2766  | 94.93841 | 103.1235 | 72.0267  | 98.89255 |
| 17224882 | Col4a4       | collagen, type IV, alpha 4                                                          | 5.088075 | 5.592642 | 5.703628 | 4.452174 | 5.703628 | 5.703628 |
| 17538222 | Col4a5       | collagen, type IV, alpha 5                                                          | 5.76292  | 6.777579 | 7.166059 | 5.549432 | 6.268803 | 7.247885 |
| 17544969 | Col4a6       | collagen, type IV, alpha 6                                                          | 6.750433 | 7.651698 | 7.667042 | 6.992896 | 6.992896 | 7.513057 |
| 17211458 | Col9a1       | collagen, type IX, alpha 1                                                          | 7.904477 | 7.739498 | 7.230573 | 6.765375 | 8.52902  | 7.945566 |
| 17418059 | Col9a2       | collagen, type IX, alpha 2                                                          | 44.16097 | 44.69    | 43.17966 | 46.13405 | 51.24715 | 44.16097 |
| 17380813 | Col9a3       | collagen, type IX, alpha 3                                                          | 13.76402 | 11.46234 | 14.68611 | 14.375   | 14.84454 | 13.55647 |
| 17368569 | Col5a1       | collagen, type V, alpha 1                                                           | 21.77499 | 22.45819 | 19.03206 | 21.48161 | 20.08574 | 20.0053  |
| 17222719 | Col5a2       | collagen, type V, alpha 2                                                           | 11.58238 | 12.3692  | 11.23969 | 12.24016 | 9.916356 | 11.56746 |
| 17524451 | Col5a3       | collagen, type V, alpha 3                                                           | 24.00928 | 22.08033 | 22.89229 | 29.05511 | 31.00373 | 27.57617 |
| 17242177 | Col6a1       | collagen, type VI, alpha 1                                                          | 28.79607 | 33.47356 | 40.39262 | 34.53961 | 25.52325 | 20.84197 |
| 17242150 | Col6a2       | collagen, type VI, alpha 2                                                          | 10.7312  | 16.19089 | 20.77591 | 18.76432 | 18.11019 | 17.70666 |
| 17225413 | Col6a3       | collagen, type VI, alpha 3                                                          | 14.5688  | 18.35448 | 17.11169 | 16.63546 | 13.77366 | 13.03646 |
| 17530579 | Col6a4       | collagen, type VI, alpha 4                                                          | 5.991179 | 6.100722 | 5.347298 | 5.360955 | 6.738278 | 6.476211 |
| 17530540 | Col6a5       | collagen, type VI, alpha 5                                                          | 5.338965 | 6.095269 | 7.800789 | 6.53379  | 6.051866 | 6.53379  |
| 17530503 | Col6a6       | collagen, type VI, alpha 6                                                          | 14.41561 | 13.80501 | 13.58855 | 14.32298 | 13.73648 | 13.23613 |
| 17522013 | Col7a1       | collagen, type VII, alpha 1                                                         | 13.20196 | 12.21879 | 11.44289 | 12.97327 | 12.6333  | 12.21879 |
| 17331162 | Col8a1       | collagen, type VIII, alpha 1                                                        | 12.70743 | 12.21879 | 13.77347 | 14.88885 | 7.422525 | 9.856736 |
| 17418581 | Col8a2       | collagen, type VIII, alpha 2                                                        | 11.52664 | 9.744377 | 12.52015 | 8.978037 | 11.20857 | 12.96581 |
| 17232529 | Col10a1      | collagen, type X, alpha 1                                                           | 4.49643  | 4.484105 | 4.795994 | 4.092975 | 3.624997 | 5.329388 |
| 17401902 | Col11a1      | collagen, type XI, alpha 1                                                          | 4.973391 | 4.964815 | 5.056468 | 4.909956 | 5.091215 | 5.041909 |
| 17336338 | Col11a2      | collagen, type XI, alpha 2                                                          | 16.08496 | 15.26854 | 16.20975 | 16.08496 | 16.08496 | 15.92068 |
| 17529099 | Col12a1      | collagen, type XII, alpha 1                                                         | 7.458782 | 8.183852 | 8.284301 | 7.760018 | 7.706202 | 7.308473 |
| 17241257 | Col13a1      | collagen, type XIII, alpha 1                                                        | 21.3797  | 18.00892 | 17.73872 | 22.22883 | 17.38173 | 17.91145 |
| 17311551 | Col14a1      | collagen, type XIV, alpha 1                                                         | 63.50023 | 66.6725  | 56.13739 | 48.16723 | 50.18172 | 54.07313 |
| 17221817 | Col19a1      | collagen, type XIX, alpha 1                                                         | 6.808892 | 7.592474 | 8.081651 | 8.350774 | 7.567097 | 6.918599 |
| 17413866 | Col15a1      | collagen, type XV, alpha 1                                                          | 17.09864 | 14.31296 | 14.31296 | 14.31296 | 14.31296 | 14.2005  |
| 17419131 | Col16a1      | collagen, type XVI, alpha 1                                                         | 11.78802 | 13.06568 | 11.49026 | 14.74087 | 12.67734 | 14.33401 |
| 17365511 | Col17a1      | collagen, type XVII, alpha 1                                                        | 6.103556 | 5.684526 | 6.111049 | 7.144039 | 7.011679 | 7.456094 |
| 17422232 | Col18a1      | collagen, type XVIII, alpha 1                                                       | 159.8395 | 153.8307 | 149.6657 | 164.7084 | 212.0734 | 171.5292 |
| 17380911 | Col20a1      | collagen, type XX, alpha 1                                                          | 6.171709 | 7.372838 | 6.799318 | 6.171709 | 5.750152 | 6.016857 |
| 17380915 | Col20a1      | collagen, type XX, alpha 1                                                          | 12.35189 | 13.7921  | 12.35189 | 12.65635 | 12.83632 | 10.9259  |
| 17317739 | Col22a1      | collagen, type XXII, alpha 1                                                        | 6.868333 | 7.703905 | 7.909574 | 7.933404 | 7.527652 | 7.707484 |
| 17249301 | Col23a1      | collagen, type XXIII, alpha 1                                                       | 18.76094 | 22.11112 | 19.51322 | 21.8474  | 20.61482 | 24.94364 |
| 17403363 | Col24a1      | collagen, type XXIV, alpha 1                                                        | 10.28115 | 10.00944 | 11.44258 | 12.13061 | 10.65723 | 11.65123 |
| 17402607 | Col25a1      | collagen, type XXV, alpha 1                                                         | 8.099203 | 8.715721 | 8.601212 | 6.502209 | 9.365331 | 7.798032 |
| 17453776 | Col26a1      | collagen, type XXVI, alpha 1                                                        | 13.30522 | 17.08253 | 15.13357 | 15.14553 | 14.52353 | 14.17267 |
| 17414672 | Col27a1      | collagen, type XXVII, alpha 1                                                       | 16.47367 | 19.42873 | 19.42873 | 19.42873 | 19.51254 | 19.42873 |
| 17464738 | Col28a1      | collagen, type XXVIII, alpha 1                                                      | 5.109068 | 5.724581 | 5.449032 | 5.820044 | 4.352065 | 6.33801  |
| 17304768 | Colq         | collagen-like tail subunit (single strand of homotrimer) of asymmetric acetylcholin | 15.98038 | 16.29221 | 13.50339 | 15.80227 | 14.46516 | 14.44802 |
| 17436999 | Crmp1        | collapsin response mediator protein 1                                               | 7.118583 | 7.911548 | 7.49132  | 7.117497 | 7.054432 | 8.027329 |
| 17311504 | Colec10      | collectin sub-family member 10                                                      | 37.84314 | 46.39733 | 35.37897 | 37.16802 | 32.9414  | 29.58574 |
| 17280383 | Colec11      | collectin sub-family member 11                                                      | 49.9596  | 59.17148 | 58.34269 | 58.89283 | 57.83617 | 60.81604 |
| 17348282 | Colec12      | collectin sub-family member 12                                                      | 134.7536 | 94.49198 | 91.96991 | 103.1457 | 114.0537 | 113.4828 |
| 17333186 | Cahm         | colon adenocarcinoma hypermethylated RNA                                            | 6.343284 | 4.775196 | 4.746783 | 5.648391 | 4.281719 | 5.720138 |
| 17409075 | Csf1         | colony stimulating factor 1 (macrophage)                                            | 19.28838 | 19.37964 | 17.10623 | 19.28838 | 17.80117 | 18.6568  |
| 17351053 | Csf1r        | colony stimulating factor 1 receptor                                                | 105.7849 | 126.4392 | 132.5571 | 93.35724 | 101.4904 | 91.29095 |
| 17262816 | Csf2         | colony stimulating factor 2 (granulocyte-macrophage)                                | 2.784233 | 2.554003 | 2.742763 | 2.901361 | 2.497959 | 2.87167  |
| 17366170 | Csf2ra       | colony stimulating factor 2 receptor, alpha, low-affinity (granulocyte-macrophage)  | 31.62777 | 35.28272 | 45.24354 | 35.28272 | 31.93596 | 36.41573 |
| 17318950 | Csf2rb2      | colony stimulating factor 2 receptor, beta 2, low-affinity (granulocyte-macrophage) | 12.18091 | 18.49009 | 23.94048 | 11.67985 | 14.86873 | 11.4792  |
| 17312716 | Csf2rb       | colony stimulating factor 2 receptor, beta, low-affinity (granulocyte-macrophage)   | 14.37938 | 14.43811 | 16.56401 | 8.592274 | 11.72487 | 11.61124 |

|          |              |                                                                    |          |          |          |          |          |          |
|----------|--------------|--------------------------------------------------------------------|----------|----------|----------|----------|----------|----------|
| 17256129 | Csf3         | colony stimulating factor 3 (granulocyte)                          | 6.129927 | 6.287864 | 6.608166 | 5.854679 | 5.944725 | 6.287864 |
| 17418485 | Csf3r        | colony stimulating factor 3 receptor (granulocyte)                 | 11.56866 | 11.63138 | 14.55457 | 11.56866 | 11.84273 | 11.52288 |
| 17511630 | Crnde        | colorectal neoplasia differentially expressed (non-protein coding) | 6.326116 | 7.653661 | 6.035193 | 7.013721 | 6.624493 | 6.76486  |
| 17261016 | Comm1        | COMM domain containing 1                                           | 19.40801 | 21.66298 | 22.27819 | 22.73621 | 22.27819 | 23.95193 |
| 17350408 | Comm10       | COMM domain containing 10                                          | 14.57749 | 16.62635 | 17.90239 | 20.26994 | 14.21242 | 16.49492 |
| 17405380 | Comm2        | COMM domain containing 2                                           | 30.72881 | 31.25576 | 30.12293 | 31.12388 | 37.11988 | 32.02774 |
| 17367278 | Comm3        | COMM domain containing 3                                           | 38.12565 | 35.8619  | 36.57941 | 42.42786 | 42.42786 | 45.71767 |
| 17527495 | Comm4        | COMM domain containing 4                                           | 54.5312  | 60.51874 | 56.067   | 64.26895 | 59.6777  | 54.73835 |
| 17312615 | Comm5        | COMM domain containing 5                                           | 6.310087 | 9.042615 | 9.174503 | 8.718803 | 14.16933 | 10.18003 |
| 17309143 | Comm6        | COMM domain containing 6                                           | 48.1896  | 42.98406 | 48.46328 | 49.26599 | 49.56947 | 48.91754 |
| 17393076 | Comm7        | COMM domain containing 7                                           | 14.28679 | 14.80354 | 13.66165 | 11.69962 | 13.55037 | 12.21312 |
| 17448607 | Comm8        | COMM domain containing 8                                           | 31.66726 | 31.94725 | 29.70142 | 30.18814 | 29.94473 | 31.21289 |
| 17373661 | Comm9        | COMM domain containing 9                                           | 29.18631 | 26.02308 | 27.95375 | 29.68989 | 28.41538 | 28.19036 |
| 17231301 | Cr1l         | complement component (3b/4b) receptor 1-like                       | 59.44897 | 56.7898  | 62.58261 | 60.26924 | 60.26924 | 60.82785 |
| 17265422 | C1qbp        | complement component 1, q subcomponent binding protein             | 139.83   | 145.8044 | 144.8303 | 154.3969 | 134.2343 | 144.3783 |
| 17431619 | C1qa         | complement component 1, q subcomponent, alpha polypeptide          | 71.99226 | 96.92991 | 95.88811 | 74.66913 | 94.4396  | 75.49086 |
| 17431607 | C1qb         | complement component 1, q subcomponent, beta polypeptide           | 172.318  | 223.3527 | 279.7046 | 175.8023 | 187.3614 | 158.1511 |
| 17431612 | C1qc         | complement component 1, q subcomponent, C chain                    | 47.96101 | 53.56096 | 56.5647  | 47.96101 | 47.96101 | 45.92443 |
| 17270388 | C1ql1        | complement component 1, q subcomponent-like 1                      | 9.038542 | 9.256136 | 8.378895 | 11.23673 | 6.158504 | 8.951752 |
| 17216671 | C1ql2        | complement component 1, q subcomponent-like 2                      | 5.14967  | 5.454814 | 5.837295 | 6.352833 | 6.311443 | 6.49901  |
| 17321484 | C1ql4        | complement component 1, q subcomponent-like 4                      | 3.405484 | 3.092128 | 3.141144 | 2.724006 | 2.7346   | 2.571856 |
| 17462872 | C1ra         | complement component 1, r subcomponent A                           | 21.50202 | 25.47005 | 26.83679 | 25.13438 | 24.70601 | 21.97011 |
| 17462893 | C1rb         | complement component 1, r subcomponent B                           | 16.85997 | 22.39788 | 19.57337 | 15.57543 | 27.904   | 18.23616 |
| 17462863 | C1rl         | complement component 1, r subcomponent-like                        | 241.1722 | 207.9035 | 232.8392 | 214.1859 | 255.2381 | 235.5484 |
| 17470740 | C1s1         | complement component 1, s subcomponent 1                           | 7.600372 | 9.244146 | 8.039969 | 8.571395 | 9.115868 | 7.844764 |
| 17470764 | C1s2         | complement component 1, s subcomponent 2                           | 3.084186 | 2.840412 | 3.448957 | 2.485231 | 3.143169 | 2.948825 |
| 17344086 | C2           | complement component 2 (within H-2S)                               | 94.42782 | 75.30637 | 90.89569 | 85.6707  | 99.02219 | 94.42782 |
| 17346528 | C3           | complement component 3                                             | 4035.691 | 4217.376 | 4339.19  | 3587.915 | 4350.363 | 3672.101 |
| 17470616 | C3ar1        | complement component 3a receptor 1                                 | 14.01325 | 15.50434 | 17.21399 | 15.19379 | 15.50434 | 10.59587 |
| 17226655 | C4bp         | complement component 4 binding protein                             | 660.6077 | 514.8684 | 417.8062 | 503.0821 | 701.7921 | 523.9299 |
| 17226669 | C4bp-ps1     | complement component 4 binding protein, pseudogene 1               | 2.7808   | 4.045281 | 3.253675 | 3.244666 | 5.316401 | 3.589667 |
| 17343976 | C4a          | complement component 4A (Rodgers blood group)                      | 11.05387 | 11.08502 | 12.44738 | 11.87742 | 13.41635 | 7.965362 |
| 17343918 | C4b          | complement component 4B (Chido blood group)                        | 1025.641 | 999.0479 | 1064.042 | 883.4961 | 1177.189 | 850.3188 |
| 17486864 | C5ar1        | complement component 5a receptor 1                                 | 6.73669  | 7.4485   | 8.392729 | 12.73308 | 6.992896 | 5.180675 |
| 17486859 | C5ar2        | complement component 5a receptor 2                                 | 28.80086 | 22.11863 | 33.4156  | 19.10926 | 19.56591 | 18.51586 |
| 17309832 | C6           | complement component 6                                             | 268.2343 | 88.65807 | 68.49705 | 181.1122 | 210.9811 | 85.35182 |
| 17315686 | C7           | complement component 7                                             | 9.606827 | 12.53248 | 12.31701 | 9.606827 | 7.810311 | 8.821476 |
| 17427729 | C8a          | complement component 8, alpha polypeptide                          | 671.9826 | 473.6639 | 416.8198 | 426.6059 | 654.2553 | 307.0798 |
| 17416196 | C8b          | complement component 8, beta polypeptide                           | 668.35   | 406.9845 | 327.0483 | 558.5141 | 708.4096 | 356.7377 |
| 17382613 | C8g          | complement component 8, gamma polypeptide                          | 301.2317 | 241.691  | 232.3281 | 314.2807 | 299.8277 | 302.6633 |
| 17309965 | C9           | complement component 9                                             | 782.8814 | 431.2289 | 381.3759 | 572.7096 | 657.474  | 473.0373 |
| 17227696 | Cfh          | complement component factor h                                      | 1679.668 | 1721.738 | 1755.663 | 1282.151 | 1796.235 | 1153.027 |
| 17402572 | Cfi          | complement component factor i                                      | 994.1984 | 1001.1   | 904.5397 | 799.2926 | 1194.781 | 894.9728 |
| 17344064 | Cfb          | complement factor B                                                | 739.8403 | 670.768  | 632.451  | 598.132  | 862.7089 | 698.8602 |
| 17235018 | Cfd          | complement factor D (adipsin)                                      | 13.35039 | 12.08261 | 12.52918 | 14.25504 | 17.294   | 15.24252 |
| 17227636 | Cfhr1        | complement factor H-related 1                                      | 372.5654 | 297.9776 | 248.3395 | 280.7632 | 314.1784 | 330.9042 |
| 17227675 | Cfhr2        | complement factor H-related 2                                      | 132.4579 | 98.61191 | 90.60571 | 108.2212 | 101.3822 | 106.63   |
| 17540521 | Cfp          | complement factor properdin                                        | 63.6655  | 77.80117 | 64.39381 | 61.49768 | 58.2756  | 56.17514 |
| 17231314 | Cr2          | complement receptor 2                                              | 5.343074 | 3.443654 | 3.727117 | 3.580398 | 5.302711 | 3.418136 |
| 17450763 | Cplx1        | complexin 1                                                        | 16.34684 | 17.56705 | 12.10432 | 18.39638 | 22.21312 | 15.27838 |
| 17287432 | Cplx2        | complexin 2                                                        | 13.15838 | 14.62313 | 12.46689 | 14.84474 | 14.86595 | 15.70432 |
| 17527542 | Cplx3        | complexin 3                                                        | 7.834113 | 7.820116 | 6.659851 | 7.198419 | 6.30895  | 5.887071 |
| 17355086 | Cplx4        | complexin 4                                                        | 4.183238 | 3.532477 | 4.183238 | 4.183238 | 5.094004 | 4.691372 |
| 17257969 | Cog1         | component of oligomeric golgi complex 1                            | 20.60054 | 19.06811 | 20.02375 | 19.73767 | 17.40331 | 22.95283 |
| 17506754 | Cog2         | component of oligomeric golgi complex 2                            | 30.39285 | 24.66204 | 30.39285 | 31.67143 | 33.89898 | 32.48001 |
| 17308686 | Cog3         | component of oligomeric golgi complex 3                            | 53.15413 | 37.09621 | 29.69072 | 40.15339 | 42.94862 | 31.70415 |
| 17505648 | Cog4         | component of oligomeric golgi complex 4                            | 105.3963 | 100.1452 | 102.4162 | 113.295  | 78.12758 | 104.482  |
| 17274841 | Cog5         | component of oligomeric golgi complex 5                            | 48.86434 | 45.88498 | 45.76333 | 47.27973 | 43.80125 | 46.79168 |
| 17405174 | Cog6         | component of oligomeric golgi complex 6                            | 50.77794 | 43.52583 | 33.46474 | 42.66585 | 38.62786 | 42.6032  |
| 17495869 | Cog7         | component of oligomeric golgi complex 7                            | 25.22321 | 31.22154 | 31.22154 | 32.29435 | 27.29832 | 28.47433 |
| 17512696 | Cog8         | component of oligomeric golgi complex 8                            | 24.89079 | 20.08491 | 16.77476 | 21.85634 | 16.29537 | 19.88543 |
| 17366278 | Csprs        | component of Sp100-rs                                              | 13.66175 | 16.23595 | 21.93252 | 19.6046  | 12.49683 | 20.98025 |
| 17366355 | Csprs        | component of Sp100-rs                                              | 4.953334 | 4.873506 | 9.13896  | 6.554837 | 4.80378  | 8.336258 |
| 17548926 | LOC101055758 | component of Sp100-rs                                              | 6.451524 | 6.992896 | 11.1571  | 9.682436 | 7.387058 | 7.076618 |
| 17366197 | LOC101055663 | component of Sp100-rs-like                                         | 3.828316 | 3.384775 | 4.647678 | 3.588523 | 2.541112 | 4.085011 |
| 17366275 | LOC102636558 | component of Sp100-rs-like                                         | 12.1138  | 7.528122 | 8.63622  | 12.06202 | 8.677022 | 5.651759 |
| 17486771 | Crx          | cone-rod homeobox                                                  | 4.16348  | 4.006993 | 4.38109  | 3.776946 | 3.160998 | 5.480357 |
| 17473999 | Crxos        | cone-rod homeobox, opposite strand                                 | 2.454876 | 2.588596 | 3.924149 | 3.644599 | 2.910385 | 2.805251 |
| 17390263 | Cdan1        | congenital dyserythropoietic anemia, type I (human)                | 12.28529 | 11.60343 | 12.28529 | 13.65502 | 12.33666 | 12.28529 |
| 17232235 | Ctgf         | connective tissue growth factor                                    | 20.73003 | 21.93405 | 26.64624 | 21.93055 | 20.56344 | 20.21592 |
| 17431234 | Cnksr1       | connector enhancer of kinase suppressor of Ras 1                   | 4.478638 | 4.801649 | 4.739911 | 5.726486 | 6.374976 | 5.012881 |
| 17545712 | Cnksr2       | connector enhancer of kinase suppressor of Ras 2                   | 2.956807 | 3.92124  | 2.928313 | 4.086285 | 3.447499 | 3.066175 |
| 17365030 | Chuk         | conserved helix-loop-helix ubiquitous kinase                       | 154.1093 | 142.4794 | 133.9425 | 161.4888 | 164.4859 | 169.7126 |
| 17220018 | Cnst         | consortin, connexin sorting protein                                | 16.57572 | 19.47485 | 22.46084 | 14.96935 | 15.43646 | 13.18705 |
| 17314387 | Cntn1        | contactin 1                                                        | 5.97012  | 5.384193 | 4.898058 | 3.610253 | 5.200967 | 5.447786 |
| 17226891 | Cntn2        | contactin 2                                                        | 6.555246 | 7.181424 | 8.42794  | 7.535379 | 6.992896 | 8.48509  |
| 17469506 | Cntn3        | contactin 3                                                        | 3.198754 | 3.123449 | 3.065686 | 3.12016  | 3.353482 | 3.332881 |
| 17461271 | Cntn4        | contactin 4                                                        | 4.308035 | 3.920832 | 4.220167 | 4.545598 | 4.172552 | 3.961756 |
| 17523952 | Cntn5        | contactin 5                                                        | 3.911224 | 3.209481 | 3.987018 | 3.183425 | 3.378025 | 3.961893 |
| 17461240 | Cntn6        | contactin 6                                                        | 3.043497 | 2.888639 | 3.620377 | 3.229968 | 3.992715 | 3.145785 |
| 17256579 | Cntnap1      | contactin associated protein-like 1                                | 18.06957 | 20.58769 | 21.57741 | 23.3712  | 17.19837 | 18.62954 |
| 17458043 | Cntnap2      | contactin associated protein-like 2                                | 5.8713   | 4.97153  | 5.457007 | 6.051153 | 6.890172 | 6.571032 |
| 17293721 | Cntnap3      | contactin associated protein-like 3                                | 7.851128 | 8.288494 | 8.237862 | 7.851128 | 8.238776 | 8.286886 |
| 17505790 | Cntnap4      | contactin associated protein-like 4                                | 3.762991 | 3.786172 | 4.116106 | 3.762991 | 3.729055 | 3.887008 |

|          |          |                                                                                   |          |          |          |          |          |          |
|----------|----------|-----------------------------------------------------------------------------------|----------|----------|----------|----------|----------|----------|
| 17216527 | Cntnap5a | contactin associated protein-like 5A                                              | 2.676133 | 3.499745 | 2.905145 | 3.990308 | 3.067706 | 3.724715 |
| 17216246 | Cntnap5b | contactin associated protein-like 5B                                              | 3.190517 | 4.043291 | 3.350253 | 2.954082 | 4.011968 | 3.409074 |
| 17339041 | Cntnap5c | contactin associated protein-like 5C                                              | 8.224227 | 7.661623 | 6.782701 | 6.708034 | 6.200566 | 8.013653 |
| 17507668 | Copsr    | coordinator of PRMT5, differentiation stimulator                                  | 13.79755 | 19.41904 | 18.84226 | 15.61813 | 16.64815 | 13.631   |
| 17391018 | Cops2    | COP9 (constitutive photomorphogenic) homolog, subunit 2 (Arabidopsis thaliana)    | 175.012  | 155.4277 | 136.4823 | 148.2009 | 153.7327 | 156.3613 |
| 17263482 | Cops3    | COP9 (constitutive photomorphogenic) homolog, subunit 3 (Arabidopsis thaliana)    | 46.01206 | 37.24049 | 36.13738 | 40.93832 | 42.66437 | 44.04145 |
| 17439590 | Cops4    | COP9 (constitutive photomorphogenic) homolog, subunit 4 (Arabidopsis thaliana)    | 48.78109 | 48.19194 | 41.04402 | 41.80953 | 40.94598 | 49.08329 |
| 17221215 | Cops5    | COP9 (constitutive photomorphogenic) homolog, subunit 5 (Arabidopsis thaliana)    | 106.4727 | 92.423   | 80.83398 | 93.81716 | 89.29268 | 87.46537 |
| 17443752 | Cops6    | COP9 (constitutive photomorphogenic) homolog, subunit 6 (Arabidopsis thaliana)    | 215.7879 | 226.931  | 192.5421 | 199.1001 | 181.6352 | 192.5421 |
| 17470994 | Cops7a   | COP9 (constitutive photomorphogenic) homolog, subunit 7a (Arabidopsis thaliana)   | 43.98135 | 51.95858 | 49.32681 | 42.87575 | 42.50469 | 44.36623 |
| 17215123 | Cops7b   | COP9 (constitutive photomorphogenic) homolog, subunit 7b (Arabidopsis thaliana)   | 17.63415 | 27.14266 | 30.29484 | 34.97543 | 29.75561 | 28.35321 |
| 17215612 | Cops8    | COP9 (constitutive photomorphogenic) homolog, subunit 8 (Arabidopsis thaliana)    | 40.47474 | 46.12765 | 47.58055 | 38.56473 | 39.02861 | 44.85199 |
| 17461581 | Cpne9    | copine family member IX                                                           | 4.198343 | 4.948564 | 5.553895 | 6.024452 | 5.911073 | 6.347815 |
| 17504074 | Cpne2    | copine II                                                                         | 65.72772 | 58.86263 | 63.50067 | 41.58583 | 39.1489  | 38.78428 |
| 17423525 | Cpne3    | copine III                                                                        | 125.351  | 104.889  | 103.4321 | 103.0285 | 95.24424 | 116.3922 |
| 17521043 | Cpne4    | copine IV                                                                         | 3.650388 | 3.609252 | 3.481189 | 3.62726  | 3.978956 | 3.715509 |
| 17342999 | Cpne5    | copine V                                                                          | 4.065887 | 4.252909 | 4.744908 | 4.542605 | 7.142752 | 4.216483 |
| 17300484 | Cpne6    | copine VI                                                                         | 12.61711 | 14.15667 | 16.77708 | 17.46543 | 15.50434 | 17.86966 |
| 17506512 | Cpne7    | copine VII                                                                        | 17.66081 | 12.85796 | 10.78258 | 12.71359 | 13.5091  | 14.81647 |
| 17320583 | Cpne8    | copine VIII                                                                       | 14.52554 | 15.69203 | 15.43839 | 12.19967 | 14.7328  | 12.96419 |
| 17361352 | Ccs      | copper chaperone for superoxide dismutase                                         | 203.2103 | 262.1393 | 241.2374 | 247.9216 | 257.727  | 210.5166 |
| 17326428 | CpoX     | coproporphyrinogen oxidase                                                        | 467.5932 | 415.9914 | 373.5325 | 427.3783 | 362.8753 | 419.5794 |
| 17260699 | Cobl     | cordon-bleu WH2 repeat                                                            | 23.29454 | 24.22677 | 21.23938 | 24.01893 | 24.43302 | 20.32847 |
| 17455962 | C1galt1  | core 1 synthase, glycoprotein-N-acetylgalactosamine 3-beta-galactosyltransferase, | 156.2822 | 144.9941 | 135.2852 | 115.6988 | 137.4116 | 136.1535 |
| 17504649 | Cbfb     | core binding factor beta                                                          | 23.24406 | 27.71605 | 31.86498 | 27.70895 | 31.12863 | 24.3387  |
| 17378216 | Cbfa2t2  | core-binding factor, runt domain, alpha subunit 2, translocated to, 2 (human)     | 13.13787 | 22.99662 | 19.61302 | 24.77855 | 17.795   | 20.13565 |
| 17513806 | Cbfa2t3  | core-binding factor, runt domain, alpha subunit 2, translocated to, 3 (human)     | 15.16097 | 11.22552 | 13.85601 | 14.6282  | 14.50864 | 13.99112 |
| 17386499 | Cir1     | corepressor interacting with RBPI, 1                                              | 16.82576 | 18.90636 | 16.23336 | 19.49537 | 16.62693 | 24.36114 |
| 17448614 | Corin    | corin                                                                             | 18.64517 | 22.10177 | 16.70688 | 19.47957 | 24.65879 | 18.81668 |
| 17337197 | Cdsn     | corneodesmosin                                                                    | 7.018487 | 5.872277 | 7.417639 | 5.901616 | 4.383399 | 6.925556 |
| 17305719 | Cnih1    | cornichon homolog 1 (Drosophila)                                                  | 48.43507 | 44.15118 | 43.3494  | 48.43507 | 44.76316 | 56.03204 |
| 17361454 | Cnih2    | cornichon homolog 2 (Drosophila)                                                  | 6.517642 | 5.403185 | 5.213709 | 4.780826 | 7.547401 | 4.382275 |
| 17220268 | Cnih3    | cornichon homolog 3 (Drosophila)                                                  | 3.388578 | 4.59126  | 4.277447 | 4.587029 | 6.403719 | 4.561916 |
| 17220255 | Cnih4    | cornichon homolog 4 (Drosophila)                                                  | 28.39844 | 34.57099 | 33.4441  | 35.90991 | 31.64839 | 34.09102 |
| 17487919 | Cnfn     | cornifelin                                                                        | 13.50976 | 15.54717 | 15.38999 | 19.36259 | 11.1178  | 12.28529 |
| 17399936 | Crnn     | cornulin                                                                          | 3.610378 | 3.729985 | 3.328749 | 4.028911 | 3.419511 | 5.175901 |
| 17253258 | Coro6    | coronin 6                                                                         | 9.232555 | 9.948852 | 9.569277 | 10.30212 | 11.42276 | 10.71203 |
| 17327765 | Coro7    | coronin 7                                                                         | 28.75418 | 47.7282  | 41.06707 | 35.55474 | 41.11805 | 40.39039 |
| 17496376 | Coro1a   | coronin, actin binding protein 1A                                                 | 17.54831 | 23.67758 | 17.11857 | 16.25881 | 14.10476 | 17.59923 |
| 17356160 | Coro1b   | coronin, actin binding protein 1B                                                 | 86.34436 | 99.81052 | 84.28944 | 97.98575 | 93.29449 | 104.5624 |
| 17451443 | Coro1c   | coronin, actin binding protein 1C                                                 | 84.58442 | 88.54813 | 80.16552 | 68.99883 | 71.65473 | 70.59235 |
| 17425058 | Coro2a   | coronin, actin binding protein 2A                                                 | 10.1503  | 11.16383 | 13.842   | 10.9881  | 13.19482 | 11.50086 |
| 17527996 | Coro2b   | coronin, actin binding protein, 2B                                                | 6.563476 | 7.629614 | 12.75685 | 11.18939 | 8.625033 | 9.158872 |
| 17498398 | Cttn     | cortactin                                                                         | 64.57796 | 62.53968 | 62.57784 | 55.62803 | 57.29431 | 60.7461  |
| 17465006 | Cttnbp2  | cortactin binding protein 2                                                       | 5.05356  | 4.491944 | 4.389571 | 4.837796 | 5.150313 | 4.285044 |
| 17507258 | Ctxn1    | cortexin 1                                                                        | 12.7307  | 13.04486 | 12.72726 | 12.94955 | 13.88832 | 14.95888 |
| 17375603 | Ctxn2    | cortexin 2                                                                        | 4.012886 | 3.819066 | 3.183845 | 3.821026 | 3.269931 | 3.974794 |
| 17350806 | Ctxn3    | cortexin 3                                                                        | 5.663328 | 6.22835  | 6.550568 | 5.821133 | 5.487998 | 5.995084 |
| 17404296 | Crh      | corticotropin releasing hormone                                                   | 11.70903 | 14.55588 | 13.34262 | 13.29471 | 11.83403 | 10.01257 |
| 17295112 | Crhbp    | corticotropin releasing hormone binding protein                                   | 4.774634 | 5.59524  | 5.067731 | 5.302453 | 5.839926 | 5.996497 |
| 17257175 | Cchr1    | corticotropin releasing hormone receptor 1                                        | 8.269901 | 9.266214 | 8.991925 | 8.246489 | 8.805714 | 6.452597 |
| 17467040 | Cchr2    | corticotropin releasing hormone receptor 2                                        | 7.261663 | 7.872763 | 7.261663 | 8.571514 | 7.603955 | 8.138822 |
| 17433023 | Cort     | cortistatin                                                                       | 5.051669 | 6.332741 | 3.761088 | 4.226871 | 4.717524 | 5.120696 |
| 17532030 | Cmc1     | COX assembly mitochondrial protein 1                                              | 39.05702 | 34.54057 | 31.98426 | 39.18392 | 39.87659 | 40.63948 |
| 17513311 | Cmc2     | COX assembly mitochondrial protein 2                                              | 27.73835 | 22.57087 | 27.64008 | 32.41164 | 20.98939 | 22.80408 |
| 17219978 | Cox20    | COX20 Cox2 chaperone                                                              | 67.32265 | 119.1901 | 110.0969 | 101.1737 | 94.54767 | 102.4077 |
| 17326711 | Cxadr    | coxsackie virus and adenovirus receptor                                           | 86.99135 | 68.92522 | 75.18432 | 62.567   | 57.71562 | 59.75759 |
| 17537338 | Cpxcr1   | CPX chromosome region, candidate 1                                                | 3.476053 | 3.255728 | 2.739628 | 2.831644 | 2.696821 | 2.70791  |
| 17513166 | Cfdp1    | craniofacial development protein 1                                                | 53.89838 | 52.42453 | 49.10881 | 48.47907 | 62.1275  | 58.42484 |
| 17219623 | Crp      | C-reactive protein, pentraxin-related                                             | 962.8852 | 878.1539 | 930.3889 | 877.0711 | 907.9066 | 843.5443 |
| 17284114 | Ckb      | creatine kinase, brain                                                            | 36.02783 | 36.09432 | 38.01508 | 35.65271 | 30.15991 | 26.17468 |
| 17375257 | Ckmt1    | creatine kinase, mitochondrial 1, ubiquitous                                      | 3.976475 | 5.883563 | 5.079512 | 5.676848 | 5.03625  | 4.911794 |
| 17294816 | Ckmt2    | creatine kinase, mitochondrial 2                                                  | 3.834876 | 3.275647 | 3.381258 | 3.202081 | 3.102153 | 3.440266 |
| 17474621 | Ckm      | creatine kinase, muscle                                                           | 15.11763 | 15.88728 | 12.76198 | 14.1883  | 13.76602 | 14.44612 |
| 17327681 | Crebbp   | CREB binding protein                                                              | 167.4945 | 198.0636 | 194.8162 | 179.0576 | 191.4866 | 176.9036 |
| 17510040 | Crtc1    | CREB regulated transcription coactivator 1                                        | 15.76038 | 24.28629 | 22.7515  | 21.29481 | 21.29481 | 18.32435 |
| 17399679 | Crtc2    | CREB regulated transcription coactivator 2                                        | 29.05833 | 43.44806 | 43.08041 | 39.07435 | 36.30081 | 44.53785 |
| 17492644 | Crtc3    | CREB regulated transcription coactivator 3                                        | 35.90095 | 43.09444 | 44.63582 | 36.84278 | 42.91143 | 29.90449 |
| 17480131 | Crebzf   | CREB/ATF bZIP transcription factor                                                | 46.02099 | 46.85984 | 31.86035 | 43.86505 | 43.86505 | 52.10392 |
| 17334956 | Crebrf   | CREB3 regulatory factor                                                           | 34.61439 | 39.81196 | 31.71536 | 35.79634 | 36.28497 | 31.91295 |
| 17211739 | Cfc1     | cripto, FRL-1, cryptic family 1                                                   | 8.122929 | 7.230874 | 8.937987 | 10.34965 | 9.310251 | 8.51685  |
| 17342109 | Cramp1l  | Crm, cramped-like (Drosophila)                                                    | 24.38835 | 23.69942 | 22.96126 | 26.16615 | 23.69942 | 23.69942 |
| 17392452 | Crnk1l   | Crn, crooked neck-like 1 (Drosophila)                                             | 23.0504  | 24.62633 | 18.91239 | 23.0891  | 20.43259 | 20.94131 |
| 17227616 | Crb1     | crumbs family member 1, photoreceptor morphogenesis associated                    | 4.024139 | 4.657933 | 4.865877 | 3.648415 | 6.863764 | 4.886969 |
| 17370420 | Crb2     | crumbs family member 2                                                            | 6.886639 | 8.098137 | 6.71236  | 5.952353 | 7.235837 | 7.575652 |
| 17338946 | Crb3     | crumbs family member 3                                                            | 26.94284 | 30.02537 | 29.53595 | 28.69067 | 25.01203 | 30.41329 |
| 17243644 | Cry1     | cryptochrome 1 (photolyase-like)                                                  | 32.12557 | 15.18442 | 16.66431 | 25.57584 | 16.34265 | 13.77843 |
| 17388389 | Cry2     | cryptochrome 2 (photolyase-like)                                                  | 20.20457 | 29.48236 | 43.76331 | 34.5353  | 35.19381 | 29.394   |
| 17335893 | Cryaa    | crystallin, alpha A                                                               | 6.746129 | 8.164984 | 8.427356 | 8.454855 | 8.675759 | 10.99069 |
| 17517132 | Cryab    | crystallin, alpha B                                                               | 13.34604 | 11.20663 | 14.68163 | 11.52944 | 13.19482 | 14.65966 |
| 17266289 | Cryba1   | crystallin, beta A1                                                               | 4.389602 | 3.689128 | 4.545409 | 4.851127 | 3.397421 | 4.505571 |
| 17224386 | Cryba2   | crystallin, beta A2                                                               | 5.821819 | 7.02535  | 5.625534 | 6.030928 | 5.989851 | 7.019752 |
| 17451195 | Cryba4   | crystallin, beta A4                                                               | 9.196341 | 6.464505 | 8.276495 | 7.439883 | 9.232619 | 6.967398 |
| 17440658 | Crybb1   | crystallin, beta B1                                                               | 13.8736  | 14.51849 | 15.43742 | 12.79244 | 15.66073 | 14.11004 |

|          |           |                                                                                |          |          |          |          |          |          |
|----------|-----------|--------------------------------------------------------------------------------|----------|----------|----------|----------|----------|----------|
| 17451323 | Crybb2    | crystallin, beta B2                                                            | 29.30754 | 33.73256 | 34.02162 | 31.42694 | 30.2793  | 28.13317 |
| 17451334 | Crybb3    | crystallin, beta B3                                                            | 17.5746  | 26.37629 | 21.84589 | 19.42873 | 19.42873 | 20.05834 |
| 17223848 | Cryga     | crystallin, gamma A                                                            | 3.290507 | 3.707303 | 3.350392 | 4.146689 | 3.544642 | 4.886969 |
| 17223844 | Crygb     | crystallin, gamma B                                                            | 2.834688 | 2.953407 | 2.236186 | 2.859732 | 2.487954 | 2.67402  |
| 17223839 | Crygc     | crystallin, gamma C                                                            | 3.168785 | 3.45264  | 3.181352 | 3.591882 | 3.758013 | 3.542358 |
| 17223834 | Crygd     | crystallin, gamma D                                                            | 2.406006 | 2.202222 | 2.135864 | 2.054176 | 2.377771 | 2.285991 |
| 17223828 | Cryge     | crystallin, gamma E                                                            | 3.291602 | 2.708699 | 2.431506 | 3.082819 | 2.87677  | 2.183511 |
| 17213765 | Crygf     | crystallin, gamma F                                                            | 2.074236 | 1.898013 | 2.255364 | 2.956397 | 2.652587 | 2.397549 |
| 17446300 | Crygn     | crystallin, gamma N                                                            | 12.2006  | 10.03355 | 10.19246 | 10.27937 | 10.92734 | 14.62363 |
| 17329345 | Crygs     | crystallin, gamma S                                                            | 5.545894 | 6.171709 | 6.571078 | 5.425703 | 6.176588 | 6.138516 |
| 17307134 | Cryl1     | crystallin, lambda 1                                                           | 32.46313 | 33.0308  | 26.47264 | 36.02084 | 23.49741 | 26.44586 |
| 17495790 | Crym      | crystallin, mu                                                                 | 11.22357 | 13.2613  | 14.09127 | 15.43475 | 12.43375 | 12.31633 |
| 17403775 | Cryz      | crystallin, zeta                                                               | 99.86934 | 121.1819 | 115.3984 | 106.5931 | 108.974  | 100.9873 |
| 17332181 | Cryz1     | crystallin, zeta (quinone reductase)-like 1                                    | 16.36612 | 18.17269 | 16.10269 | 15.96444 | 16.92132 | 16.36612 |
| 17369256 | Cstad     | CSA-conditional, T cell activation-dependent protein                           | 11.46123 | 8.152938 | 8.615891 | 8.189753 | 8.361142 | 8.842719 |
| 17527565 | Csk       | c-src tyrosine kinase                                                          | 66.15233 | 57.77206 | 73.46932 | 67.44502 | 64.55827 | 68.23831 |
| 17275724 | Ctage5    | CTAGE family, member 5                                                         | 354.362  | 428.0009 | 388.912  | 379.6773 | 376.1984 | 406.9224 |
| 17355646 | Ctdp1     | CTD (carboxy-terminal domain, RNA polymerase II, polypeptide A) phosphatase, s | 17.17538 | 20.80877 | 21.48027 | 17.4184  | 16.49801 | 17.89147 |
| 17214220 | Ctdsp1    | CTD (carboxy-terminal domain, RNA polymerase II, polypeptide A) small phosphat | 161.3724 | 148.3879 | 129.7284 | 163.4596 | 191.6699 | 169.9481 |
| 17237835 | Ctdsp2    | CTD (carboxy-terminal domain, RNA polymerase II, polypeptide A) small phosphat | 40.25595 | 49.94056 | 48.33881 | 49.32339 | 44.44626 | 49.46239 |
| 17375341 | Ctdspl2   | CTD (carboxy-terminal domain, RNA polymerase II, polypeptide A) small phosphat | 36.35142 | 47.52353 | 36.79582 | 37.96847 | 38.0636  | 44.86163 |
| 17522958 | Ctdspl    | CTD (carboxy-terminal domain, RNA polymerase II, polypeptide A) small phosphat | 24.34089 | 23.68218 | 23.8279  | 23.49497 | 19.05886 | 26.77306 |
| 17251840 | Ctnep1    | CTD nuclear envelope phosphatase 1                                             | 21.96904 | 23.16669 | 27.3779  | 20.87537 | 21.23335 | 25.41344 |
| 17503559 | Cnep1r1   | CTD nuclear envelope phosphatase 1 regulatory subunit 1                        | 21.37304 | 21.37304 | 19.42887 | 21.12486 | 18.49649 | 21.25529 |
| 17447089 | Ctbp1     | C-terminal binding protein 1                                                   | 92.87832 | 80.02784 | 89.62753 | 81.01291 | 71.9364  | 81.87551 |
| 17497153 | Ctbp2     | C-terminal binding protein 2                                                   | 8.127096 | 7.645919 | 7.987256 | 10.0976  | 8.770141 | 8.042812 |
| 17342308 | Chtf18    | CTF18, chromosome transmission fidelity factor 18                              | 7.923347 | 6.208221 | 8.448235 | 7.17247  | 6.992896 | 6.379529 |
| 17512680 | Chtf8     | CTF8, chromosome transmission fidelity factor 8                                | 90.28159 | 102.9001 | 119.233  | 98.89667 | 104.9734 | 96.83925 |
| 17481801 | Ctr9      | Ctr9, Paf1/RNA polymerase II complex component, homolog (S. cerevisiae)        | 49.23628 | 42.55952 | 42.12136 | 49.90284 | 42.2026  | 37.85652 |
| 17251454 | Ctcl1     | CTS telomere maintenance complex component 1                                   | 47.02448 | 36.74688 | 36.5376  | 38.96265 | 29.16103 | 30.9698  |
| 17408813 | Cttnbp2nl | CTTNBP2 N-terminal like                                                        | 10.00292 | 13.09605 | 21.02553 | 10.18116 | 12.72876 | 12.57625 |
| 17471528 | Clec1a    | C-type lectin domain family 1, member a                                        | 8.473688 | 7.248337 | 7.774608 | 6.800166 | 7.566311 | 6.59828  |
| 17463520 | Clec1b    | C-type lectin domain family 1, member b                                        | 36.28798 | 38.33021 | 47.47612 | 36.33656 | 38.81628 | 38.62786 |
| 17251978 | Clec10a   | C-type lectin domain family 10, member A                                       | 7.627657 | 4.801649 | 6.287864 | 5.48933  | 6.77617  | 5.48933  |
| 17490211 | Clec11a   | C-type lectin domain family 11, member a                                       | 5.138688 | 5.803809 | 4.688837 | 4.629704 | 5.535716 | 4.722596 |
| 17463509 | Clec12a   | C-type lectin domain family 12, member a                                       | 25.20137 | 21.069   | 23.2476  | 24.90787 | 24.25079 | 23.33235 |
| 17471518 | Clec12b   | C-type lectin domain family 12, member B                                       | 3.067642 | 2.855612 | 2.722307 | 2.656267 | 2.79088  | 2.423631 |
| 17281350 | Clec14a   | C-type lectin domain family 14, member a                                       | 28.70142 | 25.48065 | 32.4584  | 32.18485 | 19.77424 | 28.36952 |
| 17322874 | Clec16a   | C-type lectin domain family 16, member A                                       | 20.44576 | 21.7777  | 22.42786 | 22.42786 | 19.39308 | 22.42786 |
| 17513010 | Clec18a   | C-type lectin domain family 18, member A                                       | 12.53231 | 16.48292 | 16.52937 | 17.58228 | 16.69403 | 16.70491 |
| 17463501 | Clec2d    | C-type lectin domain family 2, member d                                        | 161.6949 | 268.1785 | 355.8289 | 282.914  | 308.9201 | 373.4574 |
| 17471484 | Clec2e    | C-type lectin domain family 2, member e                                        | 3.80435  | 4.068085 | 3.241137 | 3.164922 | 4.558597 | 3.119338 |
| 17463465 | Clec2g    | C-type lectin domain family 2, member g                                        | 2.755664 | 2.96843  | 2.337943 | 3.403479 | 2.352313 | 3.509292 |
| 17463443 | Clec2h    | C-type lectin domain family 2, member h                                        | 18.60102 | 10.02555 | 7.199317 | 9.740528 | 15.48597 | 12.12767 |
| 17463454 | Clec2i    | C-type lectin domain family 2, member i                                        | 7.889096 | 10.29356 | 8.966718 | 13.26691 | 10.96429 | 14.63986 |
| 17471440 | Clec2j    | C-type lectin domain family 2, member J                                        | 2.739818 | 3.512042 | 3.01089  | 2.938052 | 3.084443 | 3.464963 |
| 17457465 | Clec2l    | C-type lectin domain family 2, member L                                        | 3.680113 | 4.149622 | 4.497147 | 5.754498 | 5.189552 | 3.004719 |
| 17505877 | Clec3a    | C-type lectin domain family 3, member a                                        | 6.030928 | 5.508655 | 5.563335 | 6.700599 | 6.030928 | 6.700599 |
| 17523566 | Clec3b    | C-type lectin domain family 3, member b                                        | 9.315931 | 7.086337 | 9.053716 | 8.717896 | 7.429062 | 7.703105 |
| 17462729 | Clec4a1   | C-type lectin domain family 4, member a1                                       | 11.92081 | 10.99846 | 12.53708 | 12.57329 | 12.52901 | 9.622488 |
| 17462764 | Clec4a2   | C-type lectin domain family 4, member a2                                       | 4.357015 | 3.749063 | 3.983592 | 3.516231 | 4.227457 | 3.729055 |
| 17462738 | Clec4a3   | C-type lectin domain family 4, member a3                                       | 13.57274 | 13.69009 | 16.77336 | 9.388209 | 17.00103 | 14.69935 |
| 17462748 | Clec4a4   | C-type lectin domain family 4, member a4                                       | 2.756829 | 2.323484 | 2.536167 | 2.466901 | 2.845634 | 2.539246 |
| 17462756 | Clec4b1   | C-type lectin domain family 4, member b1                                       | 2.829957 | 2.540742 | 2.329451 | 2.452206 | 2.709563 | 2.519522 |
| 17462778 | Clec4b2   | C-type lectin domain family 4, member b2                                       | 7.613554 | 5.547047 | 4.364632 | 5.276386 | 6.574084 | 5.850541 |
| 17462796 | Clec4d    | C-type lectin domain family 4, member d                                        | 4.599063 | 4.003939 | 4.778408 | 3.703322 | 4.910534 | 5.173892 |
| 17470627 | Clec4e    | C-type lectin domain family 4, member e                                        | 2.681983 | 3.416171 | 3.160078 | 2.622986 | 2.965592 | 4.114907 |
| 17468209 | Clec4f    | C-type lectin domain family 4, member f                                        | 145.1147 | 185.1897 | 200.1767 | 173.1442 | 194.4048 | 172.3503 |
| 17507148 | Clec4g    | C-type lectin domain family 4, member g                                        | 186.0724 | 123.7187 | 161.2583 | 149.1386 | 58.36251 | 91.82149 |
| 17462788 | Clec4n    | C-type lectin domain family 4, member n                                        | 12.09048 | 21.82788 | 22.28977 | 14.31296 | 17.4445  | 10.29128 |
| 17466228 | Clec5a    | C-type lectin domain family 5, member a                                        | 3.232947 | 2.968265 | 3.078569 | 3.035218 | 3.262188 | 3.199441 |
| 17471541 | Clec7a    | C-type lectin domain family 7, member a                                        | 19.39577 | 26.82228 | 22.09886 | 19.14519 | 16.90408 | 19.8334  |
| 17463530 | Clec9a    | C-type lectin domain family 9, member a                                        | 6.817062 | 7.101383 | 7.794843 | 8.575852 | 7.524157 | 9.615221 |
| 17507708 | Csmd1     | CUB and Sushi multiple domains 1                                               | 4.927036 | 4.935376 | 4.131742 | 4.870399 | 4.981845 | 5.496792 |
| 17418767 | Csmd2     | CUB and Sushi multiple domains 2                                               | 6.904132 | 7.008764 | 7.137258 | 7.145376 | 6.977112 | 7.008764 |
| 17430247 | Csmd2os   | CUB and Sushi multiple domains 2, opposite strand                              | 2.751389 | 2.536765 | 2.456152 | 2.490163 | 2.879384 | 2.708117 |
| 17316878 | Csmd3     | CUB and Sushi multiple domains 3                                               | 3.094765 | 3.263862 | 3.094765 | 3.183889 | 3.003594 | 3.094765 |
| 17497017 | Cuzd1     | CUB and zona pellucida-like domains 1                                          | 4.265456 | 4.649353 | 5.356498 | 5.854516 | 4.234554 | 4.852641 |
| 17532472 | Cdcp1     | CUB domain containing protein 1                                                | 12.61921 | 14.91301 | 14.56264 | 16.58768 | 13.31675 | 13.5004  |
| 17416415 | Cdcp2     | CUB domain containing protein 2                                                | 5.867557 | 5.257985 | 5.260245 | 5.810289 | 4.590528 | 5.309257 |
| 17381791 | Cubn      | cubilin (intrinsic factor-cobalamin receptor)                                  | 3.250654 | 3.274898 | 3.274898 | 3.33732  | 3.335308 | 3.443272 |
| 17254948 | Cuedc1    | CUE domain containing 1                                                        | 5.611942 | 6.609128 | 6.819377 | 6.995223 | 4.822228 | 6.15987  |
| 17365369 | Cuedc2    | CUE domain containing 2                                                        | 28.11543 | 24.96439 | 28.14916 | 26.09298 | 18.55544 | 24.09714 |
| 17373120 | Celf1     | CUGBP, Elav-like family member 1                                               | 94.31792 | 108.5074 | 112.2086 | 110.3452 | 102.5348 | 85.96277 |
| 17381475 | Celf2     | CUGBP, Elav-like family member 2                                               | 15.83637 | 14.23164 | 13.90402 | 12.26223 | 10.44333 | 13.31869 |
| 17400103 | Celf3     | CUGBP, Elav-like family member 3                                               | 6.887546 | 7.626547 | 8.196057 | 6.769034 | 6.62385  | 5.278361 |
| 17353183 | Celf4     | CUGBP, Elav-like family member 4                                               | 7.403975 | 7.246277 | 7.746626 | 7.174508 | 8.092862 | 8.317327 |
| 17243344 | Celf5     | CUGBP, Elav-like family member 5                                               | 7.069705 | 8.750467 | 7.608225 | 8.857564 | 7.613079 | 10.36164 |
| 17517964 | Celf6     | CUGBP, Elav-like family member 6                                               | 10.53538 | 12.42479 | 11.42071 | 8.037239 | 14.68    | 16.32454 |
| 17458074 | Cul1      | cullin 1                                                                       | 102.2665 | 104.9938 | 99.5949  | 98.10876 | 102.5654 | 107.888  |
| 17348079 | Cul2      | cullin 2                                                                       | 85.37726 | 61.56634 | 66.82704 | 92.01199 | 65.36108 | 63.35779 |
| 17224791 | Cul3      | cullin 3                                                                       | 200.7283 | 192.6983 | 161.8474 | 188.9643 | 192.0236 | 198.4786 |
| 17499255 | Cul4a     | cullin 4A                                                                      | 98.73365 | 93.49453 | 96.93528 | 105.5915 | 104.0303 | 95.25481 |
| 17541190 | Cul4b     | cullin 4B                                                                      | 88.089   | 71.16125 | 79.79022 | 86.57749 | 74.77582 | 80.87377 |

|          |         |                                                                                 |          |          |          |          |          |          |
|----------|---------|---------------------------------------------------------------------------------|----------|----------|----------|----------|----------|----------|
| 17527139 | Cul5    | cullin 5                                                                        | 45.44911 | 41.17709 | 31.32516 | 36.2739  | 36.5214  | 36.72015 |
| 17338136 | Cul7    | cullin 7                                                                        | 13.524   | 13.27905 | 13.30171 | 11.99324 | 12.45515 | 13.85467 |
| 17345422 | Cul9    | cullin 9                                                                        | 14.82633 | 12.98766 | 15.77393 | 15.10998 | 15.10998 | 15.30775 |
| 17245342 | Cand1   | cullin associated and neddylation disassociated 1                               | 90.31164 | 71.16125 | 69.44024 | 72.88096 | 67.42772 | 58.16382 |
| 17461978 | Cand2   | cullin-associated and neddylation-disassociated 2 (putative)                    | 9.70777  | 14.41211 | 9.70777  | 8.532509 | 9.310251 | 8.343427 |
| 17342664 | Cuta    | cutA divalent cation tolerance homolog (E. coli)                                | 76.52239 | 101.4714 | 105.8018 | 98.76103 | 101.7997 | 98.76103 |
| 17370124 | Cutal   | cutA divalent cation tolerance homolog-like                                     | 23.14582 | 28.41361 | 30.22143 | 31.35883 | 27.92354 | 33.57929 |
| 17359623 | Cutc    | cutC copper transporter homolog (E.coli)                                        | 21.21731 | 19.00715 | 21.21731 | 22.09564 | 22.02469 | 24.16723 |
| 17453726 | Cux1    | cut-like homeobox 1                                                             | 30.0002  | 30.7254  | 29.22113 | 27.16581 | 25.23913 | 20.56829 |
| 17452311 | Cux2    | cut-like homeobox 2                                                             | 12.85556 | 11.59684 | 11.30368 | 11.50604 | 15.06073 | 10.43204 |
| 17514745 | Cwc15   | CWC15 homolog (S. cerevisiae)                                                   | 98.47393 | 89.20978 | 86.55348 | 89.22091 | 86.08262 | 90.1609  |
| 17387210 | Cwc22   | CWC22 spliceosome-associated protein homolog (S. cerevisiae)                    | 4.189912 | 5.470073 | 6.608304 | 5.427207 | 4.399196 | 5.811417 |
| 17268611 | Cwc25   | CWC25 spliceosome-associated protein homolog (S. cerevisiae)                    | 12.44677 | 12.85493 | 13.20617 | 12.71827 | 11.88508 | 11.74488 |
| 17295960 | Cwc27   | CWC27 spliceosome-associated protein homolog (S. cerevisiae)                    | 21.36134 | 21.318   | 17.75779 | 21.83635 | 20.24004 | 18.62954 |
| 17365054 | Cwf19l1 | CWF19-like 1, cell cycle control (S. pombe)                                     | 25.56114 | 24.54028 | 27.86515 | 28.33769 | 21.16575 | 34.28201 |
| 17514379 | Cwf19l2 | CWF19-like 2, cell cycle control (S. pombe)                                     | 27.77317 | 26.82711 | 27.49448 | 29.48481 | 27.94271 | 32.24783 |
| 17516352 | Clmp    | CXADR-like membrane protein                                                     | 11.39066 | 14.05625 | 12.81001 | 13.49235 | 10.49653 | 11.5023  |
| 17351708 | Cxxc1   | CXXC finger 1 (PHD domain)                                                      | 44.38899 | 49.15785 | 47.76096 | 41.53887 | 43.64728 | 43.63972 |
| 17402778 | Cxxc4   | CXXC finger 4                                                                   | 5.248154 | 5.189336 | 5.459883 | 6.646432 | 5.313307 | 5.242337 |
| 17349601 | Cxxc5   | CXXC finger 5                                                                   | 73.82103 | 88.14031 | 69.6258  | 80.73151 | 86.64352 | 100.1258 |
| 17531751 | Arpp21  | cyclic AMP-regulated phosphoprotein, 21                                         | 3.765053 | 3.777653 | 3.749349 | 3.749349 | 3.535146 | 3.700346 |
| 17423511 | Cnbd1   | cyclic nucleotide binding domain containing 1                                   | 2.207372 | 2.406006 | 2.506527 | 2.304206 | 2.171648 | 2.333944 |
| 17378575 | Cnbd2   | cyclic nucleotide binding domain containing 2                                   | 3.767298 | 3.126807 | 3.587776 | 3.653679 | 3.41009  | 3.939848 |
| 17448682 | Cnga1   | cyclic nucleotide gated channel alpha 1                                         | 3.669593 | 3.21095  | 3.289937 | 3.195829 | 2.983054 | 3.295666 |
| 17535405 | Cnga2   | cyclic nucleotide gated channel alpha 2                                         | 3.949883 | 3.136097 | 3.339703 | 3.339703 | 4.062534 | 3.369326 |
| 17211927 | Cnga3   | cyclic nucleotide gated channel alpha 3                                         | 5.770835 | 5.780603 | 5.671381 | 6.171709 | 7.223259 | 4.801982 |
| 17481369 | Cnga4   | cyclic nucleotide gated channel alpha 4                                         | 3.87888  | 4.338872 | 4.320206 | 4.445667 | 4.35774  | 3.562525 |
| 17511953 | Cngb1   | cyclic nucleotide gated channel beta 1                                          | 11.40267 | 13.06568 | 12.22727 | 11.11657 | 10.42106 | 13.39423 |
| 17412047 | Cngb3   | cyclic nucleotide gated channel beta 3                                          | 2.715259 | 2.953407 | 3.063031 | 2.953407 | 2.749444 | 3.028514 |
| 17405274 | Ccna1   | cyclin A1                                                                       | 4.688642 | 6.826329 | 5.033493 | 6.11232  | 3.996397 | 4.839909 |
| 17404821 | Ccna2   | cyclin A2                                                                       | 4.650159 | 4.846556 | 7.351609 | 5.181249 | 6.40048  | 5.56106  |
| 17295757 | Ccnb1   | cyclin B1                                                                       | 4.428291 | 4.447609 | 4.447609 | 5.025893 | 4.854356 | 5.025893 |
| 17305980 | Ccnb1p1 | cyclin B1 interacting protein 1                                                 | 3.103853 | 3.103853 | 3.103853 | 4.083171 | 3.430098 | 2.992331 |
| 17528586 | Ccnb2   | cyclin B2                                                                       | 11.4337  | 9.272768 | 11.57749 | 9.578834 | 7.81551  | 8.556139 |
| 17539781 | Ccnb3   | cyclin B3                                                                       | 3.429195 | 2.727218 | 2.706935 | 2.917737 | 3.150258 | 3.194345 |
| 17412123 | Ccnc    | cyclin C                                                                        | 26.72226 | 27.39708 | 25.30973 | 27.61232 | 26.40813 | 24.32402 |
| 17445568 | Dmtf1   | cyclin D binding myb-like transcription factor 1                                | 27.27959 | 25.72163 | 27.92954 | 28.52945 | 29.16124 | 35.69673 |
| 17498502 | Ccnd1   | cyclin D1                                                                       | 64.24846 | 70.78835 | 81.57301 | 72.10213 | 72.78453 | 70.19664 |
| 17471222 | Ccnd2   | cyclin D2                                                                       | 44.21089 | 40.23251 | 49.62379 | 34.98368 | 33.76742 | 19.12927 |
| 17338269 | Ccnd3   | cyclin D3                                                                       | 33.0537  | 38.16108 | 44.74517 | 32.922   | 35.04799 | 32.25252 |
| 17375185 | Ccnbpb1 | cyclin D-type binding-protein 1                                                 | 33.90979 | 38.29861 | 36.49457 | 37.49016 | 35.63196 | 32.86637 |
| 17489886 | Ccne1   | cyclin E1                                                                       | 9.775158 | 14.40173 | 15.15624 | 12.72682 | 13.34576 | 15.97518 |
| 17411761 | Ccne2   | cyclin E2                                                                       | 5.214106 | 5.606304 | 7.419233 | 5.888499 | 6.151209 | 6.565842 |
| 17341781 | Ccnf    | cyclin F                                                                        | 13.09396 | 14.51407 | 14.53481 | 17.51574 | 13.79267 | 15.25669 |
| 17450770 | Gak     | cyclin G associated kinase                                                      | 101.3512 | 109.7517 | 98.57022 | 93.5049  | 93.66122 | 89.45685 |
| 17261865 | Ccng1   | cyclin G1                                                                       | 199.3307 | 189.056  | 162.3102 | 159.6203 | 221.3768 | 239.5528 |
| 17439184 | Ccng2   | cyclin G2                                                                       | 29.56647 | 28.00107 | 34.72493 | 31.44503 | 28.5522  | 35.97019 |
| 17288970 | Ccnh    | cyclin H                                                                        | 40.16119 | 39.94409 | 40.16119 | 43.59528 | 38.63777 | 43.55299 |
| 17449804 | Ccni    | cyclin I                                                                        | 256.8638 | 249.4955 | 267.7179 | 262.6195 | 257.3183 | 251.6527 |
| 17359394 | Ccnj    | cyclin J                                                                        | 15.25933 | 12.83045 | 12.1301  | 15.92134 | 13.20534 | 13.39423 |
| 17248621 | Ccnj1   | cyclin J-like                                                                   | 5.145531 | 4.323741 | 4.976047 | 5.094569 | 4.291762 | 4.000665 |
| 17278512 | Ccnk    | cyclin K                                                                        | 85.56032 | 89.16094 | 77.15191 | 82.477   | 88.55304 | 96.05308 |
| 17405688 | Ccnl1   | cyclin L1                                                                       | 48.1055  | 85.41455 | 60.03658 | 60.2279  | 73.10307 | 82.88735 |
| 17422704 | Ccnl2   | cyclin L2                                                                       | 71.0538  | 100.7203 | 90.9001  | 101.4525 | 91.04261 | 93.65019 |
| 17359583 | Cnnm1   | cyclin M1                                                                       | 7.665022 | 9.971151 | 10.30648 | 7.002936 | 8.727086 | 7.169189 |
| 17360097 | Cnnm2   | cyclin M2                                                                       | 18.09539 | 14.98752 | 17.37812 | 16.79046 | 15.72535 | 14.15265 |
| 17211832 | Cnnm3   | cyclin M3                                                                       | 14.87162 | 14.6208  | 18.9217  | 19.33134 | 16.44401 | 19.10383 |
| 17211822 | Cnnm4   | cyclin M4                                                                       | 14.24003 | 8.470223 | 13.33661 | 10.45767 | 11.47936 | 9.226286 |
| 17256655 | Cntd1   | cyclin N-terminal domain containing 1                                           | 3.729055 | 3.663493 | 4.288193 | 3.729055 | 3.658976 | 3.729055 |
| 17289971 | Ccno    | cyclin O                                                                        | 4.990692 | 4.298162 | 3.302206 | 3.718653 | 3.710902 | 5.16318  |
| 17224462 | Cnppd1  | cyclin Pas1/PHO80 domain containing 1                                           | 42.71349 | 61.74969 | 53.97764 | 56.36118 | 58.41067 | 56.36118 |
| 17321248 | Ccnt1   | cyclin T1                                                                       | 30.56122 | 31.68965 | 33.02943 | 27.88795 | 27.62897 | 25.52502 |
| 17216792 | Ccnt2   | cyclin T2                                                                       | 24.17493 | 25.22968 | 20.02874 | 21.12999 | 30.36253 | 24.94606 |
| 17352580 | Ccny    | cyclin Y                                                                        | 151.3579 | 142.0948 | 141.1544 | 143.9616 | 148.6381 | 146.9335 |
| 17213687 | Ccnyl1  | cyclin Y-like 1                                                                 | 7.823694 | 9.699296 | 9.578103 | 10.00001 | 10.63052 | 13.23815 |
| 17241692 | Cdk1    | cyclin-dependent kinase 1                                                       | 9.766624 | 7.88128  | 8.467112 | 7.821363 | 9.530487 | 8.467112 |
| 17506551 | Cdk10   | cyclin-dependent kinase 10                                                      | 30.67221 | 34.08063 | 37.84288 | 37.73444 | 41.92707 | 39.10931 |
| 17422629 | Cdk11b  | cyclin-dependent kinase 11B                                                     | 51.10208 | 44.97683 | 53.85394 | 49.5736  | 61.69835 | 47.64589 |
| 17255918 | Cdk12   | cyclin-dependent kinase 12                                                      | 29.7006  | 30.08516 | 28.31766 | 30.08516 | 28.11211 | 29.08594 |
| 17290797 | Cdk13   | cyclin-dependent kinase 13                                                      | 124.9026 | 131.6579 | 125.8665 | 120.8933 | 110.19   | 127.2146 |
| 17445329 | Cdk14   | cyclin-dependent kinase 14                                                      | 4.384584 | 6.470423 | 6.344516 | 5.576771 | 5.943901 | 6.200351 |
| 17213246 | Cdk15   | cyclin-dependent kinase 15                                                      | 6.846611 | 6.345791 | 7.563846 | 6.815361 | 6.992896 | 7.618463 |
| 17533640 | Cdk16   | cyclin-dependent kinase 16                                                      | 46.91639 | 45.72528 | 55.42481 | 46.41116 | 48.02787 | 49.21649 |
| 17236502 | Cdk17   | cyclin-dependent kinase 17                                                      | 47.82457 | 46.01269 | 41.56104 | 41.47845 | 34.21886 | 41.56104 |
| 17226847 | Cdk18   | cyclin-dependent kinase 18                                                      | 58.71674 | 63.44392 | 74.04703 | 59.48112 | 60.29264 | 55.20473 |
| 17232734 | Cdk19   | cyclin-dependent kinase 19                                                      | 20.80964 | 25.24752 | 20.36288 | 20.71265 | 15.10736 | 29.50975 |
| 17240376 | Cdk19os | cyclin-dependent kinase 19, opposite strand [Source:MGI Symbol;Acc:MGI:1914837] | 6.711103 | 5.569663 | 5.926827 | 5.918452 | 5.918083 | 7.631571 |
| 17246299 | Cdk2    | cyclin-dependent kinase 2                                                       | 24.27265 | 24.82772 | 24.3156  | 22.09105 | 24.3848  | 23.37979 |
| 17284039 | Cinp    | cyclin-dependent kinase 2 interacting protein                                   | 35.67867 | 42.15582 | 42.29455 | 41.16767 | 41.23336 | 46.59651 |
| 17288160 | Cdk20   | cyclin-dependent kinase 20                                                      | 14.87275 | 14.28729 | 15.88695 | 14.23697 | 15.14206 | 14.96303 |
| 17258555 | Cdk3-ps | cyclin-dependent kinase 3, pseudogene                                           | 6.869523 | 6.340427 | 6.402609 | 6.638098 | 8.619117 | 11.54631 |
| 17237899 | Cdk4    | cyclin-dependent kinase 4                                                       | 56.19656 | 52.77307 | 55.23765 | 50.53707 | 47.06132 | 52.45833 |
| 17446170 | Cdk5    | cyclin-dependent kinase 5                                                       | 45.68093 | 52.91446 | 53.21717 | 54.22777 | 56.64513 | 54.22777 |
| 17253991 | Cdk5r1  | cyclin-dependent kinase 5, regulatory subunit 1 (p35)                           | 11.3752  | 10.38119 | 7.771052 | 12.00447 | 10.14896 | 10.04795 |

|          |              |                                                                               |          |          |          |          |          |          |
|----------|--------------|-------------------------------------------------------------------------------|----------|----------|----------|----------|----------|----------|
| 17214400 | Cdk5r2       | cyclin-dependent kinase 5, regulatory subunit 2 (p39)                         | 7.870689 | 10.29513 | 6.878052 | 9.503705 | 8.917937 | 11.5011  |
| 17434297 | Cdk6         | cyclin-dependent kinase 6                                                     | 59.05306 | 69.6147  | 74.06089 | 54.90402 | 47.65481 | 52.60726 |
| 17295718 | Cdk7         | cyclin-dependent kinase 7                                                     | 26.02489 | 19.41944 | 22.77296 | 25.39355 | 24.63077 | 24.66716 |
| 17444713 | Cdk8         | cyclin-dependent kinase 8                                                     | 100.2126 | 112.0959 | 101.9219 | 95.1611  | 83.36847 | 102.2942 |
| 17383965 | Cdk9         | cyclin-dependent kinase 9 (CDC2-related kinase)                               | 24.4854  | 29.33152 | 24.20998 | 31.86763 | 27.56107 | 27.56107 |
| 17335467 | Cdkn1a       | cyclin-dependent kinase inhibitor 1A (P21)                                    | 113.0048 | 86.80282 | 90.62643 | 90.60759 | 160.4656 | 95.76656 |
| 17463718 | Cdkn1b       | cyclin-dependent kinase inhibitor 1B                                          | 29.07586 | 28.03097 | 28.73326 | 23.18179 | 30.73904 | 30.86415 |
| 17498245 | Cdkn1c       | cyclin-dependent kinase inhibitor 1C (P57)                                    | 6.887259 | 8.809866 | 12.16108 | 9.930181 | 9.571201 | 9.749377 |
| 17427147 | Cdkn2a       | cyclin-dependent kinase inhibitor 2A                                          | 11.83855 | 14.27353 | 14.90764 | 16.49995 | 14.27353 | 15.02799 |
| 17427155 | Cdkn2b       | cyclin-dependent kinase inhibitor 2B (p15, inhibits CDK4)                     | 12.26623 | 12.35189 | 13.52597 | 15.4702  | 13.01596 | 10.40814 |
| 17428217 | Cdkn2c       | cyclin-dependent kinase inhibitor 2C (p18, inhibits CDK4)                     | 15.32059 | 14.47378 | 15.53877 | 14.73485 | 12.37143 | 17.27256 |
| 17524698 | Cdkn2d       | cyclin-dependent kinase inhibitor 2D (p19, inhibits CDK4)                     | 7.935659 | 10.16995 | 11.12852 | 11.12359 | 8.067826 | 10.7283  |
| 17299268 | Cdkn3        | cyclin-dependent kinase inhibitor 3                                           | 5.056783 | 4.785899 | 4.844138 | 5.87187  | 4.402521 | 5.56106  |
| 17281622 | Cdkl1        | cyclin-dependent kinase-like 1 (CDC2-related kinase)                          | 5.410268 | 5.754657 | 5.668944 | 5.123359 | 5.259844 | 4.551935 |
| 17449609 | Cdkl2        | cyclin-dependent kinase-like 2 (CDC2-related kinase)                          | 7.844764 | 7.698994 | 7.480476 | 7.524157 | 8.421516 | 8.206801 |
| 17249379 | Cdkl3        | cyclin-dependent kinase-like 3                                                | 6.627524 | 4.801649 | 5.016009 | 4.523502 | 5.468746 | 4.523502 |
| 17249382 | Cdkl3        | cyclin-dependent kinase-like 3                                                | 3.583005 | 3.773491 | 4.741488 | 3.837083 | 4.165414 | 3.965108 |
| 17347558 | Cdkl4        | cyclin-dependent kinase-like 4                                                | 2.929877 | 2.768952 | 2.788327 | 2.606909 | 2.706184 | 4.20927  |
| 17545785 | Cdkl5        | cyclin-dependent kinase-like 5                                                | 12.6697  | 11.50086 | 11.59917 | 9.89802  | 12.48116 | 12.75782 |
| 17500624 | LOC102641693 | cyclin-related protein FAM58A-like                                            | 4.14373  | 4.460174 | 2.513347 | 4.106388 | 2.458673 | 6.229213 |
| 17537212 | Cylc1        | cylicin, basic protein of sperm head cytoskeleton 1                           | 2.253442 | 2.243763 | 2.553843 | 2.186889 | 2.438409 | 2.438409 |
| 17414099 | Cylc2        | cylicin, basic protein of sperm head cytoskeleton 2                           | 2.67402  | 2.820127 | 3.068577 | 2.93386  | 2.67402  | 2.953407 |
| 17503681 | Cyld         | cyldromatosis (turban tumor syndrome)                                         | 23.92057 | 17.20886 | 21.03456 | 18.56444 | 20.19421 | 25.01289 |
| 17411420 | Cth          | cystathionase (cystathionine gamma-lyase)                                     | 767.4559 | 850.2186 | 1076.946 | 1074.858 | 786.2368 | 1032.31  |
| 17343227 | Cbs          | cystathionine beta-synthase                                                   | 560.8146 | 399.674  | 360.2289 | 388.3248 | 494.2544 | 491.77   |
| 17377425 | Cst10        | cystatin 10 (chondrocytes)                                                    | 2.916969 | 2.366705 | 2.584795 | 2.461606 | 2.756428 | 2.356589 |
| 17392594 | Cst11        | cystatin 11                                                                   | 2.884897 | 3.122626 | 2.880162 | 3.083161 | 4.305408 | 3.201549 |
| 17377388 | Cst12        | cystatin 12                                                                   | 3.109667 | 3.033283 | 3.033283 | 2.682448 | 3.972838 | 2.682448 |
| 17377405 | Cst13        | cystatin 13                                                                   | 2.963249 | 2.875454 | 3.171972 | 3.491048 | 3.503993 | 3.119533 |
| 17377395 | Cst8         | cystatin 8 (cystatin-related epididymal spermatogenic)                        | 4.01461  | 3.878261 | 4.009549 | 4.132859 | 4.203468 | 4.735445 |
| 17377412 | Cst9         | cystatin 9                                                                    | 4.141978 | 4.122216 | 3.664662 | 3.334337 | 3.616339 | 3.614309 |
| 17330141 | Csta1        | cystatin A1                                                                   | 4.256359 | 2.821065 | 2.961073 | 3.251826 | 2.723629 | 3.409216 |
| 17234803 | Cstb         | cystatin B                                                                    | 36.31038 | 45.73035 | 44.34256 | 47.47052 | 47.43894 | 40.2752  |
| 17392609 | Cst3         | cystatin C                                                                    | 117.3977 | 119.8412 | 139.1705 | 119.0943 | 139.323  | 135.7266 |
| 17361546 | Cst6         | cystatin E/M                                                                  | 3.254396 | 2.771525 | 3.146112 | 3.190295 | 3.243969 | 3.651907 |
| 17377464 | Cst7         | cystatin F (leukocystatin)                                                    | 6.689276 | 8.811759 | 7.611654 | 6.671865 | 7.01304  | 8.806141 |
| 17377372 | Cstl1        | cystatin-like 1                                                               | 7.502649 | 7.826569 | 8.038799 | 8.794247 | 7.439522 | 7.316786 |
| 17217610 | Csrp1        | cysteine and glycine-rich protein 1                                           | 20.92071 | 25.66055 | 36.59717 | 24.8291  | 18.93968 | 24.44894 |
| 17237208 | Csrp2        | cysteine and glycine-rich protein 2                                           | 25.66304 | 31.31539 | 35.55129 | 34.78902 | 27.16355 | 36.42785 |
| 17491368 | Csrp3        | cysteine and glycine-rich protein 3                                           | 38.75821 | 54.17217 | 58.82796 | 76.62376 | 96.88155 | 42.05805 |
| 17318650 | Cyhr1        | cysteine and histidine rich 1                                                 | 45.00427 | 44.67637 | 47.2604  | 40.23447 | 47.53209 | 42.91173 |
| 17514871 | Chordc1      | cysteine and histidine-rich domain (CHORD)-containing, zinc-binding protein 1 | 125.4527 | 102.8765 | 92.98718 | 89.01274 | 63.25467 | 60.10654 |
| 17331692 | Cyrr1        | cysteine and tyrosine-rich protein 1                                          | 31.72218 | 34.26562 | 41.0133  | 36.28144 | 21.49769 | 27.86534 |
| 17331701 | Cyrr1        | cysteine and tyrosine-rich protein 1                                          | 6.155304 | 4.081671 | 6.492572 | 5.521346 | 6.045158 | 5.145531 |
| 17383588 | Ccbl1        | cysteine conjugate-beta lyase 1                                               | 105.0484 | 107.8767 | 97.40879 | 110.5925 | 111.1058 | 73.22782 |
| 17403282 | Ccbl2        | cysteine conjugate-beta lyase 2                                               | 467.5867 | 325.2082 | 336.7117 | 323.9798 | 346.3387 | 378.2457 |
| 17354282 | Cdo1         | cysteine dioxygenase 1, cytosolic                                             | 1309.055 | 1194.921 | 1103.675 | 1510.698 | 1726.112 | 1638.602 |
| 17279499 | Crip2        | cysteine rich protein 2                                                       | 229.8597 | 173.5659 | 187.5524 | 187.8894 | 172.0304 | 165.5795 |
| 17410974 | Cyr61        | cysteine rich protein 61                                                      | 50.2287  | 54.68677 | 46.82769 | 51.71712 | 35.99638 | 45.29438 |
| 17382453 | Cysrt1       | cysteine rich tail 1                                                          | 6.451435 | 11.30164 | 8.055309 | 8.249119 | 10.03452 | 8.249119 |
| 17339801 | Crim1        | cysteine-rich transmembrane BMP regulator 1 (chordin like)                    | 57.28359 | 57.16103 | 57.16103 | 50.58753 | 51.93409 | 49.25506 |
| 17320090 | Cdpf1        | cysteine rich, DPF motif domain containing 1                                  | 15.34535 | 14.94717 | 11.66238 | 15.83121 | 11.72251 | 14.87399 |
| 17322146 | Csad         | cysteine sulfinic acid decarboxylase                                          | 70.46427 | 77.50621 | 59.45062 | 61.47551 | 66.37923 | 28.3051  |
| 17407496 | Crcr1        | cysteine-rich C-terminal 1                                                    | 2.997625 | 3.197956 | 2.828035 | 2.883098 | 2.784407 | 3.283353 |
| 17536961 | Chic1        | cysteine-rich hydrophobic domain 1                                            | 4.176024 | 3.418753 | 3.25496  | 4.501201 | 4.352065 | 4.398495 |
| 17448905 | Chic2        | cysteine-rich hydrophobic domain 2                                            | 68.0489  | 69.08353 | 53.43674 | 66.92299 | 70.90277 | 68.81447 |
| 17340232 | Cript        | cysteine-rich PDZ-binding protein                                             | 114.4814 | 98.35115 | 90.499   | 94.25126 | 92.41403 | 96.69437 |
| 17515517 | Cypt10       | cysteine-rich perinuclear theca 10                                            | 4.25008  | 4.489174 | 5.516947 | 3.049832 | 4.855938 | 4.686497 |
| 17396192 | Cypt12       | cysteine-rich perinuclear theca 12                                            | 4.223796 | 4.13538  | 4.193631 | 4.223796 | 4.038473 | 4.817618 |
| 17541229 | Cypt14       | cysteine-rich perinuclear theca 14                                            | 2.637315 | 2.67402  | 2.202115 | 2.912867 | 2.467449 | 2.822963 |
| 17534372 | Cypt15       | cysteine-rich perinuclear theca 15                                            | 2.173274 | 2.137701 | 2.188405 | 2.072842 | 2.955967 | 2.964235 |
| 17537034 | Cypt2        | cysteine-rich perinuclear theca 2                                             | 3.310295 | 2.68031  | 2.90984  | 3.463378 | 3.158282 | 2.388757 |
| 17539023 | Cypt3        | cysteine-rich perinuclear theca 3                                             | 5.195239 | 6.054173 | 5.769755 | 6.180228 | 4.769077 | 6.624814 |
| 17533469 | Cypt8        | cysteine-rich perinuclear theca 8                                             | 26.84386 | 19.08252 | 20.62811 | 17.54101 | 17.71034 | 24.7043  |
| 17279509 | Crip1        | cysteine-rich protein 1 (intestinal)                                          | 19.05622 | 23.42781 | 26.77584 | 22.87104 | 22.87104 | 23.29406 |
| 17338103 | Crip3        | cysteine-rich protein 3                                                       | 8.265545 | 7.118583 | 7.069166 | 7.200015 | 6.632349 | 7.964148 |
| 17344953 | Crip1        | cysteine-rich secretory protein 1                                             | 4.39365  | 3.233239 | 2.6055   | 3.748673 | 3.380648 | 4.832065 |
| 17344963 | Crip2        | cysteine-rich secretory protein 2                                             | 2.972754 | 2.700469 | 5.164934 | 3.742753 | 3.863665 | 3.52553  |
| 17344943 | Crip3        | cysteine-rich secretory protein 3                                             | 4.56663  | 2.717123 | 2.710746 | 3.677257 | 3.161173 | 2.659804 |
| 17221520 | Crip4        | cysteine-rich secretory protein 4                                             | 3.005094 | 2.945964 | 3.005094 | 3.263862 | 3.327019 | 3.339703 |
| 17211313 | Crispld1     | cysteine-rich secretory protein LCCL domain containing 1                      | 4.420716 | 4.420716 | 3.977191 | 5.330349 | 3.757414 | 4.476558 |
| 17506206 | Crispld2     | cysteine-rich secretory protein LCCL domain containing 2                      | 11.64009 | 11.80266 | 12.10272 | 10.6289  | 11.12775 | 11.30446 |
| 17349634 | Cystm1       | cysteine-rich transmembrane module containing 1                               | 22.0166  | 20.70533 | 19.21272 | 23.21797 | 20.24818 | 25.93485 |
| 17461725 | Creld1       | cysteine-rich with EGF-like domains 1                                         | 60.34992 | 53.24632 | 46.27336 | 69.62483 | 46.11774 | 54.77289 |
| 17313998 | Creld2       | cysteine-rich with EGF-like domains 2                                         | 303.3144 | 64.18259 | 80.78133 | 84.79398 | 85.47022 | 45.39527 |
| 17532257 | Csrnp1       | cysteine-serine-rich nuclear protein 1                                        | 10.3037  | 8.290965 | 9.631096 | 10.76368 | 9.218104 | 11.46433 |
| 17321714 | Csrnp2       | cysteine-serine-rich nuclear protein 2                                        | 17.52874 | 18.46767 | 13.79497 | 13.01019 | 14.52011 | 14.67746 |
| 17371254 | Csrnp3       | cysteine-serine-rich nuclear protein 3                                        | 6.082186 | 6.759704 | 6.722883 | 11.72389 | 5.944725 | 6.486904 |
| 17544061 | Cysltr1      | cysteinyl leukotriene receptor 1                                              | 3.371943 | 3.371943 | 4.152471 | 3.287338 | 3.371943 | 3.852567 |
| 17308556 | Cysltr2      | cysteinyl leukotriene receptor 2                                              | 5.350783 | 3.480006 | 3.095237 | 3.300581 | 4.911215 | 3.261759 |
| 17498271 | Cars         | cysteinyl-tRNA synthetase                                                     | 38.36769 | 31.88619 | 27.24765 | 35.75715 | 42.61265 | 31.88619 |
| 17507440 | Cars2        | cysteinyl-tRNA synthetase 2 (mitochondrial)(putative)                         | 32.76106 | 28.11699 | 30.11186 | 30.6501  | 30.21012 | 33.58325 |
| 17456247 | Cftr         | cystic fibrosis transmembrane conductance regulator                           | 3.009972 | 3.009972 | 2.48961  | 3.317416 | 4.30705  | 2.884817 |
| 17280296 | Cys1         | cystin 1                                                                      | 8.684965 | 6.524422 | 7.345649 | 5.528431 | 5.455457 | 8.949642 |

|          |              |                                                          |          |          |          |          |          |          |
|----------|--------------|----------------------------------------------------------|----------|----------|----------|----------|----------|----------|
| 17265733 | Ctns         | cystinosis, nephropathic                                 | 47.9022  | 51.82154 | 47.07862 | 39.81444 | 50.53952 | 59.68597 |
| 17429454 | Ctps         | cytidine 5-triphosphate synthase                         | 13.75191 | 14.37958 | 14.64057 | 16.23595 | 13.38885 | 14.45563 |
| 17539434 | Ctps2        | cytidine 5-triphosphate synthase 2                       | 18.78176 | 20.23779 | 20.91549 | 20.19659 | 19.26687 | 20.28217 |
| 17307337 | Cdadcl1      | cytidine and dCMP deaminase domain containing 1          | 45.46423 | 46.31508 | 42.57044 | 46.31508 | 41.22764 | 49.56398 |
| 17431761 | Cda          | cytidine deaminase                                       | 39.95433 | 49.50595 | 49.14048 | 46.22784 | 42.28517 | 30.48315 |
| 17428430 | Cmpk1        | cytidine monophosphate (UMP-CMP) kinase 1                | 53.61445 | 56.28232 | 51.34244 | 48.28289 | 52.12921 | 53.62709 |
| 17274620 | Cmpk2        | cytidine monophosphate (UMP-CMP) kinase 2, mitochondrial | 40.03001 | 23.15401 | 29.04605 | 35.88876 | 24.39781 | 26.36935 |
| 17285944 | Cmah         | cytidine monophospho-N-acetylneuraminic acid hydroxylase | 278.2716 | 177.0288 | 162.3091 | 247.1615 | 234.9419 | 189.4811 |
| 17464146 | Cmas         | cytidine monophospho-N-acetylneuraminic acid synthetase  | 102.3169 | 78.08264 | 74.25571 | 90.75719 | 83.62486 | 89.43143 |
| 17532633 | CYTB         | cytochrome b                                             | 6258.365 | 6467.399 | 6484.502 | 6537.802 | 6656.37  | 6761.042 |
| 17371708 | Cybrd1       | cytochrome b reductase 1                                 | 8.863522 | 12.9009  | 11.70433 | 10.59653 | 11.47093 | 9.672307 |
| 17513672 | Cyba         | cytochrome b-245, alpha polypeptide                      | 34.1717  | 30.97366 | 38.59468 | 26.36112 | 36.25053 | 26.31147 |
| 17540154 | Cybb         | cytochrome b-245, beta polypeptide                       | 68.30835 | 76.53194 | 85.61134 | 61.01703 | 61.01703 | 59.43291 |
| 17264636 | Cyb5d1       | cytochrome b5 domain containing 1                        | 45.09451 | 40.75994 | 45.89452 | 42.15465 | 46.45204 | 40.84847 |
| 17265710 | Cyb5d2       | cytochrome b5 domain containing 2                        | 38.35838 | 36.55837 | 31.38297 | 39.00454 | 37.01017 | 34.341   |
| 17217440 | Cyb5r1       | cytochrome b5 reductase 1                                | 18.76237 | 21.41797 | 21.41797 | 22.85107 | 17.22927 | 20.12867 |
| 17494739 | Cyb5r2       | cytochrome b5 reductase 2                                | 4.694235 | 4.801649 | 4.801649 | 4.502793 | 4.86136  | 5.675195 |
| 17319783 | Cyb5r3       | cytochrome b5 reductase 3                                | 635.8488 | 688.2935 | 778.3634 | 561.0945 | 560.7835 | 536.543  |
| 17520043 | Cyb5r4       | cytochrome b5 reductase 4                                | 46.25156 | 36.9994  | 32.23911 | 40.13252 | 34.67803 | 42.6493  |
| 17416397 | Cyb5rl       | cytochrome b5 reductase-like                             | 16.16935 | 16.16935 | 16.47367 | 15.71129 | 14.23184 | 16.16935 |
| 17352229 | Cyb5a        | cytochrome b5 type A (microsomal)                        | 320.1979 | 359.9892 | 342.1962 | 369.0596 | 384.916  | 404.9556 |
| 17505252 | Cyb5b        | cytochrome b5 type B                                     | 315.7918 | 312.0211 | 292.822  | 283.2751 | 217.6792 | 244.1223 |
| 17270703 | Cyb561       | cytochrome b-561                                         | 15.18642 | 15.46859 | 16.88898 | 19.55072 | 16.23584 | 13.79717 |
| 17409234 | Cyb561d1     | cytochrome b-561 domain containing 1                     | 6.23725  | 8.467112 | 9.01083  | 7.898014 | 10.95684 | 8.355522 |
| 17530909 | Cyb561d2     | cytochrome b-561 domain containing 2                     | 13.333   | 10.33467 | 11.08933 | 12.35189 | 12.5113  | 12.35189 |
| 17357514 | Cyb561a3     | cytochrome b561 family, member A3                        | 20.04333 | 17.37282 | 21.80837 | 27.09341 | 20.38915 | 20.38915 |
| 17269839 | Coa3         | cytochrome C oxidase assembly factor 3                   | 113.4946 | 90.99655 | 98.72407 | 97.68668 | 92.40634 | 99.27579 |
| 17480757 | Coa4         | cytochrome c oxidase assembly factor 4                   | 14.92191 | 12.54708 | 15.66497 | 15.72197 | 18.84265 | 14.20995 |
| 17222326 | Coa5         | cytochrome C oxidase assembly factor 5                   | 140.2007 | 139.467  | 136.5618 | 143.0445 | 131.9018 | 144.9016 |
| 17506933 | Coa6         | cytochrome c oxidase assembly factor 6                   | 56.0946  | 44.04908 | 47.68752 | 51.67949 | 57.69562 | 46.2429  |
| 17416633 | Coa7         | cytochrome c oxidase assembly factor 7                   | 23.69449 | 21.30987 | 22.46209 | 25.36118 | 21.81381 | 24.41118 |
| 17264107 | Cox10        | cytochrome c oxidase assembly protein 10                 | 26.13407 | 23.54877 | 30.02787 | 29.86389 | 29.25477 | 25.99838 |
| 17255081 | Cox11        | cytochrome c oxidase assembly protein 11                 | 9.860631 | 12.43832 | 11.1842  | 11.14805 | 7.822176 | 14.03804 |
| 17314900 | Cox14        | cytochrome c oxidase assembly protein 14                 | 28.59102 | 35.36107 | 30.67114 | 32.69391 | 26.62261 | 36.75223 |
| 17364954 | Cox15        | cytochrome c oxidase assembly protein 15                 | 65.71132 | 72.93958 | 67.74911 | 77.53146 | 42.74963 | 53.69143 |
| 17282320 | Cox16        | cytochrome c oxidase assembly protein 16                 | 30.66094 | 32.41995 | 42.12924 | 30.72498 | 27.97565 | 37.73863 |
| 17325581 | Cox17        | cytochrome c oxidase assembly protein 17                 | 28.34515 | 45.27774 | 36.89619 | 42.05397 | 40.60062 | 36.79404 |
| 17449516 | Cox18        | cytochrome c oxidase assembly protein 18                 | 38.76519 | 37.7164  | 43.65576 | 32.32593 | 33.48911 | 35.82438 |
| 17454398 | Cox19        | cytochrome c oxidase assembly protein 19                 | 23.23343 | 20.43981 | 25.6044  | 19.54449 | 18.66896 | 21.8126  |
| 17290965 | LOC102641600 | cytochrome c oxidase subunit 5B, mitochondrial           | 327.0551 | 336.0681 | 399.8874 | 368.9624 | 451.9283 | 361.8405 |
| 17532609 | COX1         | cytochrome c oxidase subunit I                           | 6827.634 | 6768.92  | 6558.454 | 7047.325 | 6533.181 | 6893.448 |
| 17532613 | COX2         | cytochrome c oxidase subunit II                          | 4283.784 | 4612.33  | 4584.949 | 4688.465 | 4525.966 | 4769.955 |
| 17506273 | Cox4i1       | cytochrome c oxidase subunit IV isoform 1                | 266.6937 | 264.142  | 244.2627 | 285.6273 | 304.4117 | 288.5325 |
| 17377785 | Cox4i2       | cytochrome c oxidase subunit IV isoform 2                | 6.224725 | 5.979936 | 6.260249 | 5.278983 | 8.818174 | 4.948599 |
| 17517727 | Cox5a        | cytochrome c oxidase subunit Va                          | 254.1101 | 221.3246 | 238.6959 | 265.116  | 259.1458 | 261.5984 |
| 17211850 | Cox5b        | cytochrome c oxidase subunit Vb                          | 5.257292 | 8.467112 | 6.115922 | 6.287864 | 7.603744 | 7.438955 |
| 17451726 | Cox6a1       | cytochrome c oxidase subunit VIa polypeptide 1           | 1277.874 | 1726.542 | 2069.462 | 1630.931 | 1585.135 | 1675.76  |
| 17496857 | Cox6a2       | cytochrome c oxidase subunit VIa polypeptide 2           | 8.522106 | 8.522106 | 8.696953 | 8.522106 | 6.748    | 8.60163  |
| 17485904 | Cox6b2       | cytochrome c oxidase subunit VIb polypeptide 2           | 10.24658 | 10.71916 | 11.28911 | 10.47501 | 7.007355 | 8.149322 |
| 17316436 | Cox6c        | cytochrome c oxidase subunit VIc                         | 14.45363 | 15.83934 | 16.10269 | 16.24102 | 16.15053 | 16.9117  |
| 1747698  | Cox6c        | cytochrome c oxidase subunit VIc                         | 520.0945 | 556.2964 | 508.6749 | 549.6426 | 549.6426 | 578.182  |
| 17476288 | Cox7a1       | cytochrome c oxidase subunit VIIa 1                      | 8.488561 | 12.36594 | 14.10525 | 13.32875 | 10.79948 | 12.70602 |
| 17529169 | Cox7a2       | cytochrome c oxidase subunit VIIa 2                      | 247.7549 | 226.92   | 241.5219 | 273.3812 | 279.1003 | 296.1019 |
| 17347638 | Cox7a2l      | cytochrome c oxidase subunit VIIa polypeptide 2-like     | 47.22766 | 53.2526  | 49.71847 | 55.2342  | 60.40851 | 54.49833 |
| 17537048 | Cox7b        | cytochrome c oxidase subunit VIIb                        | 4.649933 | 5.922146 | 6.352216 | 3.808572 | 7.549808 | 5.439372 |
| 17448589 | Cox7b2       | cytochrome c oxidase subunit VIIb2                       | 2.575281 | 2.769777 | 2.529899 | 2.304206 | 2.720421 | 2.708962 |
| 17294723 | Cox7c        | cytochrome c oxidase subunit VIIc                        | 8.572999 | 7.188995 | 8.479563 | 7.458937 | 8.768074 | 11.24304 |
| 17362274 | Cox8a        | cytochrome c oxidase subunit VIIla                       | 228.5079 | 321.0958 | 359.9868 | 299.0432 | 336.553  | 324.6519 |
| 17497704 | Cox8b        | cytochrome c oxidase subunit VIIlb                       | 3.643184 | 4.033633 | 3.009972 | 3.16251  | 3.394102 | 3.45264  |
| 17278124 | Cox8c        | cytochrome c oxidase subunit VIIlc                       | 3.566626 | 3.826406 | 3.243025 | 3.357716 | 3.826406 | 4.277299 |
| 17489223 | Cox6b1       | cytochrome c oxidase, subunit VIb polypeptide 1          | 210.9358 | 240.6195 | 203.5571 | 225.187  | 216.7533 | 232.7762 |
| 17342507 | Gm10012      | cytochrome c oxidase, subunit VIIc pseudogene            | 76.01488 | 85.33466 | 79.44971 | 90.66979 | 77.5716  | 91.71654 |
| 17466723 | Cycs         | cytochrome c, somatic                                    | 15.67594 | 13.98986 | 13.50864 | 14.89463 | 14.40782 | 16.27121 |
| 17548541 | Cycs         | cytochrome c, somatic                                    | 157.9769 | 144.2293 | 125.8263 | 128.5014 | 117.2651 | 152.8847 |
| 17386751 | Cyct         | cytochrome c, testis                                     | 3.738372 | 3.46727  | 3.856842 | 3.704888 | 4.875094 | 3.788351 |
| 17312396 | Cyc1         | cytochrome c-1                                           | 109.6886 | 109.3099 | 108.9143 | 115.9903 | 111.7553 | 123.7633 |
| 17359299 | LOC105247429 | cytochrome P450 2C38-like                                | 4.217944 | 10.22685 | 8.28746  | 4.378753 | 7.423194 | 7.19797  |
| 17517770 | Cyp1a1       | cytochrome P450, family 1, subfamily a, polypeptide 1    | 4.158289 | 5.605682 | 6.992896 | 5.229127 | 4.47721  | 6.182713 |
| 17527581 | Cyp1a2       | cytochrome P450, family 1, subfamily a, polypeptide 2    | 539.6985 | 558.4174 | 427.8556 | 594.2722 | 514.6758 | 703.7016 |
| 17347448 | Cyp1b1       | cytochrome P450, family 1, subfamily b, polypeptide 1    | 4.158692 | 4.72289  | 4.265397 | 4.010995 | 3.824391 | 3.892967 |
| 17517828 | Cyp11a1      | cytochrome P450, family 11, subfamily a, polypeptide 1   | 4.923758 | 4.958212 | 4.103315 | 3.660067 | 4.204808 | 4.20927  |
| 17517831 | Cyp11a1      | cytochrome P450, family 11, subfamily a, polypeptide 1   | 5.466813 | 4.857116 | 4.647678 | 5.24819  | 6.047714 | 5.124531 |
| 17318045 | Cyp11b1      | cytochrome P450, family 11, subfamily b, polypeptide 1   | 3.276805 | 2.922291 | 2.85779  | 2.69598  | 3.138119 | 3.441697 |
| 17318058 | Cyp11b2      | cytochrome P450, family 11, subfamily b, polypeptide 2   | 4.801649 | 4.20927  | 4.397428 | 4.801649 | 4.801649 | 4.801649 |
| 17365410 | Cyp17a1      | cytochrome P450, family 17, subfamily a, polypeptide 1   | 85.4264  | 114.9617 | 556.1383 | 233.3206 | 360.2039 | 373.2685 |
| 17527193 | Cyp19a1      | cytochrome P450, family 19, subfamily a, polypeptide 1   | 3.083246 | 3.245138 | 3.221941 | 3.85206  | 2.878905 | 3.171906 |
| 17475487 | Cyp2a12      | cytochrome P450, family 2, subfamily a, polypeptide 12   | 2062.002 | 2024.837 | 1994.954 | 2033.769 | 2140.037 | 2221.287 |
| 17488105 | Cyp2a22      | cytochrome P450, family 2, subfamily a, polypeptide 22   | 31.49105 | 75.09162 | 103.1722 | 60.52587 | 62.9904  | 89.6847  |
| 17475399 | Cyp2a4       | cytochrome P450, family 2, subfamily a, polypeptide 4    | 237.6328 | 657.597  | 1202.374 | 349.6336 | 239.1646 | 348.2525 |
| 17475469 | Cyp2a5       | cytochrome P450, family 2, subfamily a, polypeptide 5    | 21.93496 | 36.19077 | 29.85643 | 31.58221 | 15.52423 | 33.41699 |
| 17329093 | Cyp2ab1      | cytochrome P450, family 2, subfamily ab, polypeptide 1   | 4.341429 | 3.447331 | 3.703322 | 3.703322 | 3.670432 | 4.187677 |
| 17475360 | Cyp2b10      | cytochrome P450, family 2, subfamily b, polypeptide 10   | 11.56048 | 4.870399 | 6.479803 | 5.254524 | 6.041848 | 6.358031 |
| 17475373 | Cyp2b13      | cytochrome P450, family 2, subfamily b, polypeptide 13   | 13.80539 | 29.41887 | 67.10461 | 16.33472 | 15.06564 | 92.12686 |
| 17475447 | Cyp2b19      | cytochrome P450, family 2, subfamily b, polypeptide 19   | 2.406006 | 2.837814 | 2.64145  | 2.822728 | 2.644491 | 3.19191  |



|          |          |                                                                              |          |          |          |          |          |          |
|----------|----------|------------------------------------------------------------------------------|----------|----------|----------|----------|----------|----------|
| 17428441 | Cyp4x1   | cytochrome P450, family 4, subfamily x, polypeptide 1                        | 6.702596 | 7.629984 | 7.868726 | 8.64107  | 7.06701  | 9.19768  |
| 17417162 | Cyp4x1os | cytochrome P450, family 4, subfamily x, polypeptide 1, opposite strand       | 5.14079  | 4.579436 | 4.117218 | 4.527988 | 4.527988 | 4.794997 |
| 17278543 | Cyp46a1  | cytochrome P450, family 46, subfamily a, polypeptide 1                       | 11.18955 | 11.99773 | 14.43741 | 13.77204 | 12.35489 | 12.35489 |
| 17445308 | Cyp51    | cytochrome P450, family 51                                                   | 111.2946 | 78.20018 | 117.3293 | 90.43191 | 135.0163 | 64.61736 |
| 17423051 | Cyp7a1   | cytochrome P450, family 7, subfamily a, polypeptide 1                        | 32.03995 | 198.9083 | 251.7626 | 157.8664 | 254.237  | 487.6323 |
| 17404245 | Cyp7b1   | cytochrome P450, family 7, subfamily b, polypeptide 1                        | 365.0398 | 102.9093 | 59.74226 | 325.454  | 116.9331 | 98.51695 |
| 17532409 | Cyp8b1   | cytochrome P450, family 8, subfamily b, polypeptide 1                        | 296.4777 | 403.5126 | 406.8773 | 428.8978 | 268.8225 | 326.559  |
| 17272461 | Cygb     | cytoglobin                                                                   | 47.60034 | 51.95317 | 55.62764 | 45.33866 | 35.4676  | 35.4676  |
| 17272722 | Cyth1    | cytohesin 1                                                                  | 26.76322 | 32.91492 | 33.36122 | 29.42621 | 26.59844 | 31.9488  |
| 17385405 | Cytip    | cytohesin 1 interacting protein                                              | 3.935345 | 4.20927  | 3.828661 | 5.000457 | 5.231991 | 4.226871 |
| 17490960 | Cyth2    | cytohesin 2                                                                  | 50.55599 | 49.07172 | 53.64382 | 51.88336 | 52.23446 | 45.00926 |
| 17444372 | Cyth3    | cytohesin 3                                                                  | 9.043743 | 12.13481 | 15.91185 | 11.86385 | 10.00743 | 10.18603 |
| 17312759 | Cyth4    | cytohesin 4                                                                  | 34.5365  | 36.02983 | 44.95719 | 38.9192  | 39.55039 | 36.24525 |
| 17511887 | Ciapi1   | cytokine induced apoptosis inhibitor 1                                       | 38.15367 | 46.17596 | 49.66543 | 50.97755 | 36.10758 | 38.13622 |
| 17521300 | Cish     | cytokine inducible SH2-containing protein                                    | 15.95404 | 9.884445 | 11.97895 | 12.82121 | 13.03592 | 8.585725 |
| 17501940 | Crif1    | cytokine receptor-like factor 1                                              | 7.744918 | 8.633467 | 9.092078 | 10.32235 | 7.446074 | 8.871204 |
| 17450918 | Crif2    | cytokine receptor-like factor 2                                              | 18.16312 | 18.90859 | 18.55582 | 22.93979 | 19.49537 | 18.71405 |
| 17266659 | Crif3    | cytokine receptor-like factor 3                                              | 19.08649 | 17.66963 | 17.69733 | 21.75432 | 16.74931 | 19.74438 |
| 17447698 | Clnk     | cytokine-dependent hematopoietic cell linker                                 | 4.01823  | 4.596195 | 4.074915 | 3.851739 | 4.59594  | 3.319624 |
| 17437117 | Clnkos   | cytokine-dependent hematopoietic cell linker, opposite strand                | 6.631982 | 4.801649 | 5.050933 | 5.895401 | 5.886132 | 4.802015 |
| 17437043 | Cytl1    | cytokine-like 1                                                              | 6.171709 | 8.767223 | 9.268205 | 6.431789 | 11.01907 | 7.865726 |
| 17478549 | Cyfp1    | cytoplasmic FMR1 interacting protein 1                                       | 78.10321 | 75.03647 | 77.87941 | 68.29462 | 59.12884 | 78.52717 |
| 17262065 | Cyfp2    | cytoplasmic FMR1 interacting protein 2                                       | 13.45882 | 10.47073 | 9.722788 | 8.261192 | 8.439397 | 8.398316 |
| 17297777 | Cphx2    | cytoplasmic polyadenylated homeobox 2                                        | 5.681178 | 4.620503 | 5.466927 | 6.124067 | 4.55667  | 5.170307 |
| 17297810 | Cphx2    | cytoplasmic polyadenylated homeobox 2                                        | 5.138438 | 4.257864 | 4.862203 | 5.111051 | 4.404383 | 4.843534 |
| 17297842 | Cphx2    | cytoplasmic polyadenylated homeobox 2                                        | 5.138438 | 4.257864 | 4.862203 | 5.111051 | 4.404383 | 4.843534 |
| 17492754 | Cpeb1    | cytoplasmic polyadenylation element binding protein 1                        | 7.98864  | 8.870467 | 8.6984   | 9.114288 | 8.597815 | 8.470458 |
| 17437129 | Cpeb2    | cytoplasmic polyadenylation element binding protein 2                        | 114.3625 | 103.4722 | 101.7772 | 125.3962 | 98.0734  | 126.8509 |
| 17364218 | Cpeb3    | cytoplasmic polyadenylation element binding protein 3                        | 7.666723 | 9.383655 | 9.196405 | 9.020641 | 9.85216  | 9.160396 |
| 17248213 | Cpeb4    | cytoplasmic polyadenylation element binding protein 4                        | 146.1079 | 124.0287 | 111.4544 | 116.8319 | 82.77539 | 87.89688 |
| 17508025 | Ckap2    | cytoskeleton associated protein 2                                            | 3.832617 | 4.08722  | 3.913312 | 3.598286 | 4.707562 | 4.600817 |
| 17391544 | Ckap2l   | cytoskeleton associated protein 2-like                                       | 3.953417 | 5.429653 | 3.692019 | 5.507853 | 5.291145 | 6.286426 |
| 17373328 | Ckap5    | cytoskeleton associated protein 5                                            | 31.33841 | 30.59937 | 31.31235 | 30.59937 | 26.88985 | 32.04039 |
| 17243617 | Ckap4    | cytoskeleton-associated protein 4                                            | 7.996618 | 12.82476 | 11.54327 | 11.4784  | 13.21936 | 11.10402 |
| 17391247 | Ciao1    | cytosolic iron-sulfur protein assembly 1                                     | 75.88064 | 73.11269 | 71.3163  | 76.22752 | 72.72855 | 79.01748 |
| 17477178 | Ctu1     | cytosolic thiouridylase subunit 1 homolog (S. pombe)                         | 9.016765 | 10.46108 | 8.30759  | 5.828966 | 6.538139 | 8.745434 |
| 17506400 | Ctu2     | cytosolic thiouridylase subunit 2 homolog (S. pombe)                         | 23.4192  | 21.92158 | 25.50061 | 22.21019 | 24.91012 | 22.65143 |
| 17525856 | Crtam    | cytotoxic and regulatory T cell molecule                                     | 4.377873 | 5.01368  | 4.418633 | 4.399776 | 4.467972 | 4.126132 |
| 17460405 | Tia1     | cytotoxic granule-associated RNA binding protein 1                           | 10.87113 | 14.31296 | 14.31296 | 13.93653 | 14.49095 | 14.31296 |
| 17293362 | Ctla2a   | cytotoxic T lymphocyte-associated protein 2 alpha                            | 7.823315 | 6.584391 | 8.264457 | 6.73515  | 3.70079  | 8.476038 |
| 17293348 | Ctla2b   | cytotoxic T lymphocyte-associated protein 2 beta                             | 4.896599 | 4.114708 | 6.41736  | 5.872684 | 6.066944 | 9.003463 |
| 17213478 | Ctla4    | cytotoxic T-lymphocyte-associated protein 4                                  | 3.027506 | 2.577138 | 2.578193 | 2.690138 | 2.87159  | 2.536941 |
| 17477979 | Dbp      | D site albumin promoter binding protein                                      | 42.13829 | 105.4723 | 145.167  | 62.97817 | 87.39265 | 117.7571 |
| 17216096 | D2hgdh   | D-2-hydroxyglutarate dehydrogenase                                           | 30.91146 | 33.89804 | 31.69097 | 30.91146 | 31.61331 | 23.62922 |
| 17476125 | Dpf1     | D4, zinc and double PHD fingers family 1                                     | 9.060307 | 12.71589 | 10.67704 | 10.67379 | 9.860221 | 11.49839 |
| 17361833 | Dpf2     | D4, zinc and double PHD fingers family 2                                     | 35.5572  | 37.47873 | 39.15596 | 35.69277 | 34.66842 | 37.74124 |
| 17282403 | Dpf3     | D4, zinc and double PHD fingers, family 3                                    | 6.171709 | 8.467112 | 8.467112 | 9.812427 | 8.467112 | 8.669748 |
| 17390941 | Dach1    | dachshund 1 (Drosophila)                                                     | 2.980822 | 3.426581 | 3.224532 | 3.42416  | 2.734961 | 3.213644 |
| 17537283 | Dach2    | dachshund 2 (Drosophila)                                                     | 3.046431 | 2.78215  | 3.505451 | 3.361139 | 3.048374 | 2.810779 |
| 17494610 | Dchs1    | dachsous 1 (Drosophila)                                                      | 9.756948 | 12.81214 | 11.12281 | 11.50086 | 13.92273 | 10.05109 |
| 17398528 | Dchs2    | dachsous 2 (Drosophila) [Source:MGI Symbol;Acc:MGI:2685263]                  | 3.927932 | 3.883991 | 3.553572 | 3.514453 | 4.004355 | 3.927932 |
| 17521858 | Dalrd3   | DALR anticodon binding domain containing 3                                   | 44.08543 | 48.22168 | 46.63464 | 46.19677 | 43.90977 | 42.10559 |
| 17357529 | Ddb1     | damage specific DNA binding protein 1                                        | 228.1454 | 212.5222 | 198.8298 | 204.2228 | 202.5747 | 183.259  |
| 17388196 | Ddb2     | damage specific DNA binding protein 2                                        | 16.52055 | 21.44709 | 21.88029 | 16.02753 | 19.26219 | 18.85781 |
| 17440775 | Dao      | D-amino acid oxidase                                                         | 6.554519 | 5.292979 | 5.15996  | 5.376622 | 5.286196 | 5.852812 |
| 17511161 | Dand5    | DAN domain family, member 5                                                  | 5.338965 | 4.953781 | 6.408426 | 4.705376 | 5.193906 | 5.376063 |
| 17276139 | Dact1    | dapper homolog 1, antagonist of beta-catenin (xenopus)                       | 11.00266 | 10.1498  | 7.97586  | 10.52268 | 9.056603 | 11.57251 |
| 17341069 | Dact2    | dapper homolog 2, antagonist of beta-catenin (xenopus)                       | 31.10641 | 27.61366 | 31.45288 | 32.63821 | 28.36009 | 23.67824 |
| 17474205 | Dact3    | dapper homolog 3, antagonist of beta-catenin (xenopus)                       | 7.982164 | 8.536827 | 13.91858 | 8.793759 | 11.13593 | 8.551218 |
| 17232763 | Ddo      | D-aspartate oxidase                                                          | 14.28768 | 14.77955 | 18.18668 | 21.82985 | 13.30005 | 16.43159 |
| 17235278 | Dazap1   | DAZ associated protein 1                                                     | 86.79259 | 119.4324 | 118.5614 | 113.379  | 104.4277 | 105.6281 |
| 17315045 | Dazap2   | DAZ associated protein 2                                                     | 168.8701 | 197.9813 | 186.3499 | 160.1944 | 195.2908 | 171.8803 |
| 17309457 | Dzip1    | DAZ interacting protein 1                                                    | 4.816383 | 5.856749 | 5.565649 | 4.832769 | 5.30091  | 5.525098 |
| 17438680 | Gm7337   | DAZ interacting protein 1 pseudogene                                         | 12.21939 | 12.19045 | 10.66876 | 7.975749 | 10.82196 | 10.66876 |
| 17520742 | Dzip1l   | DAZ interacting protein 1-like                                               | 6.225458 | 7.274207 | 6.273672 | 7.097692 | 6.030928 | 7.562745 |
| 17330815 | Dzip3    | DAZ interacting protein 3, zinc finger                                       | 7.698994 | 8.672993 | 7.698994 | 7.698994 | 5.957677 | 6.465626 |
| 17445507 | Dbf4     | DBF4 homolog (S. cerevisiae)                                                 | 8.58281  | 7.902121 | 7.922084 | 7.922084 | 6.981998 | 10.29855 |
| 17501104 | Dctd     | dCMP deaminase                                                               | 10.04997 | 11.71918 | 9.732834 | 11.41802 | 10.4806  | 11.24366 |
| 17404731 | Dcun1d1  | DCN1, defective in cullin neddylation 1, domain containing 1 (S. cerevisiae) | 12.44962 | 13.77108 | 10.86021 | 12.36508 | 12.25527 | 12.44574 |
| 17507584 | Dcun1d2  | DCN1, defective in cullin neddylation 1, domain containing 2 (S. cerevisiae) | 35.34171 | 26.44293 | 29.75953 | 28.24141 | 25.95463 | 32.17928 |
| 17495692 | Dcun1d3  | DCN1, defective in cullin neddylation 1, domain containing 3 (S. cerevisiae) | 16.64792 | 19.67729 | 18.65399 | 15.77972 | 15.24908 | 11.72991 |
| 1738134  | Dcun1d4  | DCN1, defective in cullin neddylation 1, domain containing 4 (S. cerevisiae) | 56.50513 | 53.94473 | 53.34755 | 50.56825 | 49.15513 | 53.01615 |
| 17514471 | Dcun1d5  | DCN1, defective in cullin neddylation 1, domain containing 5 (S. cerevisiae) | 48.6612  | 49.19978 | 39.99894 | 53.95557 | 53.93837 | 48.6612  |
| 17298171 | Dcp1a    | DCP1 decapping enzyme homolog A (S. cerevisiae)                              | 16.8685  | 18.06619 | 19.9459  | 18.67259 | 11.08164 | 14.32368 |
| 17462231 | Dcp1b    | DCP1 decapping enzyme homolog B (S. cerevisiae)                              | 12.38378 | 12.50601 | 12.37451 | 12.74483 | 14.03532 | 13.8587  |
| 17350281 | Dcp2     | DCP2 decapping enzyme homolog (S. cerevisiae)                                | 26.0693  | 23.89903 | 25.96111 | 26.55515 | 32.45953 | 27.71144 |
| 17407049 | Dcst1    | DC-STAMP domain containing 1                                                 | 4.530122 | 5.291035 | 6.136644 | 5.185812 | 6.452776 | 5.252885 |
| 17399411 | Dcst2    | DC-STAMP domain containing 2                                                 | 6.803325 | 9.879171 | 6.82666  | 6.107619 | 5.993007 | 7.383475 |
| 17496645 | Dctpp1   | dCTP pyrophosphatase 1                                                       | 29.96923 | 32.15341 | 37.5518  | 41.44454 | 37.29447 | 41.27968 |
| 17413649 | Dcaf10   | DDb1 and CUL4 associated factor 10                                           | 84.33853 | 56.0946  | 49.95164 | 56.0946  | 54.66365 | 46.43498 |
| 17300519 | Dcaf11   | DDb1 and CUL4 associated factor 11                                           | 236.9272 | 232.1704 | 240.1347 | 253.9763 | 224.6772 | 257.8503 |
| 17424203 | Dcaf12   | DDb1 and CUL4 associated factor 12                                           | 54.23153 | 58.00519 | 50.22452 | 53.3261  | 53.92379 | 50.05839 |
| 17541328 | Dcaf12l1 | DDb1 and CUL4 associated factor 12-like 1                                    | 5.174107 | 6.329274 | 6.372502 | 5.774196 | 5.548701 | 4.862405 |
| 17541322 | Dcaf12l2 | DDb1 and CUL4 associated factor 12-like 2                                    | 3.827971 | 4.886969 | 4.886969 | 4.886969 | 5.299183 | 4.367901 |

|          |         |                                                          |          |          |          |          |          |          |
|----------|---------|----------------------------------------------------------|----------|----------|----------|----------|----------|----------|
| 17311199 | Dcaf13  | DDB1 and CUL4 associated factor 13                       | 52.69704 | 63.27352 | 69.13144 | 74.2166  | 84.98345 | 76.8184  |
| 17511023 | Dcaf15  | DDB1 and CUL4 associated factor 15                       | 10.32457 | 12.43186 | 10.64925 | 11.57099 | 10.63664 | 15.4747  |
| 17371684 | Dcaf17  | DDB1 and CUL4 associated factor 17                       | 26.75803 | 28.84121 | 26.58038 | 28.62592 | 30.07828 | 25.02521 |
| 17277043 | Dcaf4   | DDB1 and CUL4 associated factor 4                        | 9.908592 | 13.11386 | 10.87218 | 13.11386 | 11.56746 | 16.03286 |
| 17282253 | Dcaf5   | DDB1 and CUL4 associated factor 5                        | 53.05916 | 52.30076 | 50.32139 | 54.31467 | 45.80712 | 46.82931 |
| 17281481 | Gm17821 | DDB1 and CUL4 associated factor 5 pseudogene             | 2.897101 | 3.973031 | 3.338801 | 3.414206 | 5.285903 | 3.559094 |
| 17229233 | Dcaf6   | DDB1 and CUL4 associated factor 6                        | 121.1877 | 155.292  | 157.6553 | 148.3252 | 152.9886 | 136.7029 |
| 17257492 | Dcaf7   | DDB1 and CUL4 associated factor 7                        | 80.88611 | 81.846   | 99.86658 | 83.44999 | 91.52348 | 89.04113 |
| 17219499 | Dcaf8   | DDB1 and CUL4 associated factor 8                        | 186.7921 | 183.9513 | 158.0766 | 167.9782 | 168.0609 | 160.9122 |
| 17305685 | Ddhd1   | DDHD domain containing 1                                 | 67.60462 | 53.06909 | 51.8528  | 51.08685 | 50.1939  | 44.23419 |
| 17508396 | Ddhd2   | DDHD domain containing 2                                 | 36.93944 | 53.65683 | 49.68953 | 45.49765 | 34.47432 | 44.74765 |
| 17523730 | Ddi1    | DDI1, DNA-damage inducible 1, homolog 1 (S. cerevisiae)  | 2.850154 | 3.056202 | 2.72378  | 2.686616 | 3.081152 | 2.41739  |
| 17241912 | Ddt     | D-dopachrome tautomerase                                 | 573.1901 | 533.7795 | 531.2768 | 606.0067 | 553.1857 | 581.3971 |
| 17391693 | Ddrgk1  | DDRKG domain containing 1                                | 114.5307 | 106.4875 | 118.9779 | 109.6286 | 137.2945 | 150.989  |
| 17280009 | Ddx1    | DEAD (Asp-Glu-Ala-Asp) box polypeptide 1                 | 179.9809 | 172.6121 | 177.5203 | 180.4281 | 169.013  | 168.0283 |
| 17527032 | Ddx10   | DEAD (Asp-Glu-Ala-Asp) box polypeptide 10                | 38.05806 | 27.79204 | 28.13434 | 29.19117 | 23.80463 | 26.75265 |
| 17319230 | Ddx17   | DEAD (Asp-Glu-Ala-Asp) box polypeptide 17                | 124.4369 | 127.9716 | 121.5613 | 121.5613 | 111.3247 | 127.4537 |
| 17226369 | Ddx18   | DEAD (Asp-Glu-Ala-Asp) box polypeptide 18                | 59.50752 | 51.46608 | 52.35916 | 55.68782 | 54.51873 | 42.70668 |
| 17512975 | Ddx19a  | DEAD (Asp-Glu-Ala-Asp) box polypeptide 19a               | 60.81815 | 89.56977 | 71.26343 | 73.25016 | 88.8574  | 93.38572 |
| 17512990 | Ddx19b  | DEAD (Asp-Glu-Ala-Asp) box polypeptide 19b               | 21.33825 | 19.34662 | 21.4974  | 19.87276 | 19.54896 | 17.90723 |
| 17408829 | Ddx20   | DEAD (Asp-Glu-Ala-Asp) box polypeptide 20                | 24.82772 | 20.54264 | 23.26566 | 24.52906 | 23.27743 | 26.76137 |
| 17241436 | Ddx21   | DEAD (Asp-Glu-Ala-Asp) box polypeptide 21                | 53.95482 | 49.16126 | 47.36075 | 49.81851 | 46.65113 | 39.87769 |
| 17321287 | Ddx23   | DEAD (Asp-Glu-Ala-Asp) box polypeptide 23                | 64.48135 | 58.02771 | 60.67246 | 67.2732  | 62.76116 | 64.34829 |
| 17283536 | Ddx24   | DEAD (Asp-Glu-Ala-Asp) box polypeptide 24                | 52.34646 | 47.75236 | 57.282   | 57.36942 | 56.39596 | 54.85267 |
| 17525405 | Ddx25   | DEAD (Asp-Glu-Ala-Asp) box polypeptide 25                | 3.477113 | 4.225172 | 3.005552 | 3.60203  | 4.096154 | 4.096154 |
| 17379841 | Ddx27   | DEAD (Asp-Glu-Ala-Asp) box polypeptide 27                | 33.01981 | 28.63703 | 26.29306 | 31.84401 | 36.52443 | 32.96881 |
| 17512630 | Ddx28   | DEAD (Asp-Glu-Ala-Asp) box polypeptide 28                | 17.25114 | 20.28414 | 22.10683 | 18.69383 | 23.99547 | 18.7417  |
| 17546834 | Ddx3y   | DEAD (Asp-Glu-Ala-Asp) box polypeptide 3, Y-linked       | 151.2121 | 142.434  | 136.5126 | 147.0456 | 158.2564 | 150.5032 |
| 17502976 | Ddx39   | DEAD (Asp-Glu-Ala-Asp) box polypeptide 39                | 18.47343 | 18.93955 | 29.71007 | 16.73191 | 17.56912 | 15.90998 |
| 17337046 | Ddx39b  | DEAD (Asp-Glu-Ala-Asp) box polypeptide 39b               | 35.94402 | 50.80329 | 60.47219 | 52.13174 | 48.99219 | 57.70682 |
| 17296225 | Ddx4    | DEAD (Asp-Glu-Ala-Asp) box polypeptide 4                 | 3.323515 | 3.258188 | 3.305045 | 3.409263 | 3.364075 | 3.642831 |
| 17292922 | Ddx41   | DEAD (Asp-Glu-Ala-Asp) box polypeptide 41                | 29.71316 | 24.42489 | 26.93593 | 29.09663 | 28.14975 | 30.90911 |
| 17257534 | Ddx42   | DEAD (Asp-Glu-Ala-Asp) box polypeptide 42                | 38.43876 | 35.37308 | 37.83055 | 40.8989  | 41.12689 | 33.80934 |
| 17519699 | Ddx43   | DEAD (Asp-Glu-Ala-Asp) box polypeptide 43                | 2.837027 | 2.837027 | 2.925088 | 2.62384  | 2.459525 | 2.796883 |
| 17287733 | Ddx46   | DEAD (Asp-Glu-Ala-Asp) box polypeptide 46                | 78.83585 | 74.84272 | 74.68414 | 69.85348 | 78.00799 | 62.33282 |
| 17463731 | Ddx47   | DEAD (Asp-Glu-Ala-Asp) box polypeptide 47                | 58.86303 | 47.3509  | 43.69511 | 46.28042 | 50.36397 | 50.28862 |
| 17509997 | Ddx49   | DEAD (Asp-Glu-Ala-Asp) box polypeptide 49                | 50.4905  | 41.33437 | 37.30766 | 40.95024 | 39.50655 | 48.50461 |
| 17270974 | Ddx5    | DEAD (Asp-Glu-Ala-Asp) box polypeptide 5                 | 266.0475 | 334.3071 | 326.9146 | 329.4144 | 303.6131 | 325.1158 |
| 17270999 | Ddx5    | DEAD (Asp-Glu-Ala-Asp) box polypeptide 5                 | 585.4613 | 882.4373 | 942.2591 | 1003.079 | 845.0952 | 994.2398 |
| 17241454 | Ddx50   | DEAD (Asp-Glu-Ala-Asp) box polypeptide 50                | 82.76105 | 72.57546 | 66.16884 | 69.89464 | 64.54529 | 74.04447 |
| 17440553 | Ddx51   | DEAD (Asp-Glu-Ala-Asp) box polypeptide 51                | 15.53252 | 18.76315 | 18.25893 | 23.03395 | 21.32036 | 20.31988 |
| 17254347 | Ddx52   | DEAD (Asp-Glu-Ala-Asp) box polypeptide 52                | 24.21468 | 24.56121 | 22.60328 | 24.56121 | 24.56121 | 18.18353 |
| 17441701 | Ddx54   | DEAD (Asp-Glu-Ala-Asp) box polypeptide 54                | 101.6369 | 78.93428 | 77.31626 | 84.40637 | 86.5133  | 84.40637 |
| 17442534 | Ddx55   | DEAD (Asp-Glu-Ala-Asp) box polypeptide 55                | 16.94714 | 15.41475 | 15.03601 | 16.09566 | 13.73162 | 15.43357 |
| 17260331 | Ddx56   | DEAD (Asp-Glu-Ala-Asp) box polypeptide 56                | 34.2547  | 39.49012 | 34.08299 | 31.71624 | 30.63078 | 25.3756  |
| 17423987 | Ddx58   | DEAD (Asp-Glu-Ala-Asp) box polypeptide 58                | 56.70563 | 46.18428 | 50.8981  | 55.58755 | 49.03568 | 57.46175 |
| 17217777 | Ddx59   | DEAD (Asp-Glu-Ala-Asp) box polypeptide 59                | 12.95081 | 14.82335 | 13.39841 | 15.16391 | 9.279069 | 14.93049 |
| 17516633 | Ddx6    | DEAD (Asp-Glu-Ala-Asp) box polypeptide 6                 | 299.1925 | 253.7387 | 210.4947 | 266.8083 | 249.6079 | 242.3805 |
| 17501440 | Ddx60   | DEAD (Asp-Glu-Ala-Asp) box polypeptide 60                | 8.297519 | 10.19677 | 11.05081 | 14.85637 | 10.59925 | 11.54319 |
| 17353758 | Dnd1    | dead end homolog 1 (zebrafish)                           | 3.864602 | 4.124216 | 4.709259 | 4.651706 | 5.38688  | 4.20927  |
| 17339187 | Ddx11   | DEAD/H (Asp-Glu-Ala-Asp/His) box helicase 11             | 15.13818 | 12.09669 | 10.37716 | 12.40208 | 7.968234 | 10.1189  |
| 17534909 | Ddx26b  | DEAD/H (Asp-Glu-Ala-Asp/His) box polypeptide 26b         | 7.035583 | 8.396162 | 9.105764 | 7.945401 | 9.636906 | 10.12781 |
| 17533416 | Ddx3x   | DEAD/H (Asp-Glu-Ala-Asp/His) box polypeptide 3, X-linked | 203.4894 | 215.6697 | 175.2852 | 199.1208 | 228.2577 | 198.458  |
| 17368762 | Ddx31   | DEAD/H (Asp-Glu-Ala-Asp/His) box polypeptide 31          | 12.86197 | 11.58423 | 10.24736 | 10.33302 | 8.80663  | 10.7292  |
| 17466670 | Dfna5   | deafness, autosomal dominant 5 (human)                   | 6.359353 | 6.29266  | 6.214852 | 5.824645 | 4.920313 | 6.275498 |
| 17372233 | Dfmb59  | deafness, autosomal recessive 59 (human)                 | 3.703322 | 3.90567  | 3.188814 | 3.557244 | 3.729055 | 4.120902 |
| 17347505 | Dhx57   | DEAH (Asp-Glu-Ala-Asp/His) box polypeptide 57            | 27.85916 | 26.12773 | 25.02126 | 33.03103 | 23.83814 | 30.44809 |
| 17448021 | Dhx15   | DEAH (Asp-Glu-Ala-Asp/His) box polypeptide 15            | 118.3183 | 116.3897 | 110.6063 | 120.8966 | 113.361  | 112.0874 |
| 17337285 | Dhx16   | DEAH (Asp-Glu-Ala-Asp/His) box polypeptide 16            | 38.8031  | 35.50229 | 37.76113 | 38.20872 | 35.88826 | 37.76113 |
| 17289941 | Dhx29   | DEAH (Asp-Glu-Ala-Asp/His) box polypeptide 29            | 40.98517 | 31.80651 | 35.62554 | 41.18223 | 31.82569 | 30.49583 |
| 17531488 | Dhx30   | DEAH (Asp-Glu-Ala-Asp/His) box polypeptide 30            | 16.49081 | 15.67529 | 16.67726 | 18.33489 | 15.10464 | 16.92812 |
| 17497223 | Dhx32   | DEAH (Asp-Glu-Ala-Asp/His) box polypeptide 32            | 49.07478 | 51.75047 | 45.51121 | 51.61362 | 43.16679 | 45.10796 |
| 17265432 | Dhx33   | DEAH (Asp-Glu-Ala-Asp/His) box polypeptide 33            | 43.7248  | 39.12069 | 41.08671 | 40.80234 | 41.1266  | 41.6721  |
| 17486834 | Dhx34   | DEAH (Asp-Glu-Ala-Asp/His) box polypeptide 34            | 16.26276 | 15.76256 | 16.38291 | 17.7279  | 16.20054 | 16.38291 |
| 17378964 | Dhx35   | DEAH (Asp-Glu-Ala-Asp/His) box polypeptide 35            | 17.77663 | 20.40315 | 25.69294 | 22.77643 | 20.67277 | 21.11037 |
| 17405513 | Dhx36   | DEAH (Asp-Glu-Ala-Asp/His) box polypeptide 36            | 107.1368 | 82.72492 | 78.60341 | 92.65841 | 85.07716 | 93.34624 |
| 17452989 | Dhx37   | DEAH (Asp-Glu-Ala-Asp/His) box polypeptide 37            | 24.88975 | 23.63069 | 24.4364  | 25.25978 | 23.63069 | 21.37244 |
| 17512780 | Dhx38   | DEAH (Asp-Glu-Ala-Asp/His) box polypeptide 38            | 30.12439 | 27.69589 | 27.98244 | 26.21117 | 31.00975 | 25.54519 |
| 17267393 | Dhx40   | DEAH (Asp-Glu-Ala-Asp/His) box polypeptide 40            | 78.50867 | 71.80389 | 75.05467 | 72.21567 | 82.62807 | 74.24541 |
| 17256828 | Dhx8    | DEAH (Asp-Glu-Ala-Asp/His) box polypeptide 8             | 55.47131 | 44.95252 | 42.64457 | 46.91671 | 55.21813 | 41.86086 |
| 17228204 | Dhx9    | DEAH (Asp-Glu-Ala-Asp/His) box polypeptide 9             | 170.1178 | 159.4953 | 133.9824 | 129.8543 | 149.3538 | 143.3015 |
| 17459903 | Dqx1    | DEAQ RNA-dependent ATPase                                | 9.269683 | 13.22797 | 18.3354  | 19.58314 | 16.25329 | 18.01179 |
| 17406867 | Dap3    | death associated protein 3                               | 30.3211  | 33.69868 | 32.26325 | 35.77699 | 33.90627 | 33.90627 |
| 17287984 | Dapk1   | death associated protein kinase 1                        | 140.4118 | 157.1959 | 154.3134 | 176.4249 | 158.4232 | 117.7718 |
| 17371011 | Dapl1   | death associated protein-like 1                          | 3.421408 | 3.98017  | 4.235816 | 4.535369 | 4.141777 | 4.034193 |
| 17437574 | Dthd1   | death domain containing 1                                | 5.008331 | 4.097006 | 3.682614 | 4.260728 | 3.816526 | 3.932345 |
| 17219286 | Dedd    | death effector domain-containing                         | 39.36932 | 39.36932 | 45.1139  | 43.00463 | 39.36932 | 39.36932 |
| 17487876 | Dedd2   | death effector domain-containing DNA binding protein 2   | 32.59797 | 35.86091 | 30.37221 | 36.97479 | 25.98865 | 35.92559 |
| 17395658 | Dido1   | death inducer-oblierator 1                               | 52.89429 | 62.57958 | 54.88652 | 52.49762 | 54.42132 | 55.25488 |
| 17310808 | Dap     | death-associated protein                                 | 402.3201 | 508.8159 | 695.7764 | 450.5521 | 553.2777 | 503.2181 |
| 17518680 | Dapk2   | death-associated protein kinase 2                        | 22.41729 | 19.30189 | 25.30271 | 19.98132 | 15.79877 | 19.09933 |
| 17235584 | Dapk3   | death-associated protein kinase 3                        | 41.16111 | 35.65197 | 44.16771 | 39.57342 | 52.21962 | 40.42007 |
| 17207222 | Dbr1    | debranching enzyme homolog 1 (S. cerevisiae)             | 4.478079 | 4.914178 | 5.277007 | 5.567077 | 5.235764 | 5.876634 |
| 17525342 | Dcps    | decapping enzyme, scavenger                              | 17.8313  | 20.78902 | 20.21438 | 15.81312 | 18.50111 | 23.17874 |

|          |           |                                                                    |          |          |          |          |          |          |
|----------|-----------|--------------------------------------------------------------------|----------|----------|----------|----------|----------|----------|
| 17336725 | Dxo       | decapping exoribonuclease                                          | 25.21744 | 18.54541 | 27.38056 | 26.11234 | 26.70115 | 20.74239 |
| 17236800 | Dcn       | decorin                                                            | 363.6559 | 469.3792 | 432.735  | 359.0946 | 255.9556 | 330.6268 |
| 17484167 | Dock1     | dedicator of cytokinesis 1                                         | 32.2094  | 42.01318 | 49.08363 | 41.02297 | 40.09777 | 34.22242 |
| 17224813 | Dock10    | dedicator of cytokinesis 10                                        | 23.56249 | 26.89079 | 30.92818 | 21.11491 | 23.85798 | 22.27325 |
| 17533994 | Dock11    | dedicator of cytokinesis 11                                        | 7.534595 | 6.992896 | 8.713909 | 6.831489 | 7.751578 | 6.712732 |
| 17261650 | Dock2     | dedicator of cyto-kinesis 2                                        | 15.40311 | 13.63989 | 14.31296 | 15.72818 | 13.39888 | 13.59901 |
| 17530805 | Dock3     | dedicator of cyto-kinesis 3                                        | 4.936573 | 4.684808 | 4.034556 | 4.772384 | 4.443696 | 4.490263 |
| 17275168 | Dock4     | dedicator of cytokinesis 4                                         | 72.85217 | 71.67808 | 70.97259 | 71.24911 | 73.48715 | 67.05625 |
| 17307991 | Dock5     | dedicator of cytokinesis 5                                         | 44.33088 | 47.33449 | 46.62785 | 46.62785 | 47.00036 | 44.90549 |
| 17524775 | Dock6     | dedicator of cytokinesis 6                                         | 17.61216 | 21.43193 | 25.61346 | 18.44528 | 17.93642 | 16.47778 |
| 17427494 | Dock7     | dedicator of cytokinesis 7                                         | 35.02784 | 32.87844 | 37.77867 | 26.82619 | 36.03308 | 33.32863 |
| 17358274 | Dock8     | dedicator of cytokinesis 8                                         | 65.77056 | 70.94308 | 77.49761 | 71.49002 | 72.16113 | 61.1237  |
| 17309580 | Dock9     | dedicator of cytokinesis 9                                         | 30.55825 | 33.4557  | 30.35264 | 26.09154 | 24.98777 | 26.79942 |
| 17492289 | Det1      | de-etiolated homolog 1 (Arabidopsis)                               | 13.90305 | 11.56906 | 16.73759 | 10.95274 | 10.50431 | 7.781995 |
| 17317115 | Dsccl     | defective in sister chromatid cohesion 1 homolog (S. cerevisiae)   | 3.119079 | 3.232006 | 3.483192 | 2.988725 | 3.309355 | 3.559809 |
| 17306333 | Dad1      | defender against cell death 1                                      | 435.7238 | 510.6532 | 507.1856 | 392.0055 | 411.5517 | 404.9697 |
| 17499808 | Defb1     | defensin beta 1                                                    | 4.269331 | 6.282288 | 6.639249 | 5.826987 | 7.636174 | 5.971527 |
| 17499823 | Defb10    | defensin beta 10                                                   | 2.959944 | 2.67402  | 2.481049 | 2.990942 | 3.024738 | 3.207124 |
| 17507945 | Defb11    | defensin beta 11                                                   | 1.996357 | 2.802841 | 2.120773 | 2.358468 | 2.388508 | 2.665489 |
| 17507842 | Defb12    | defensin beta 12                                                   | 2.406006 | 2.281385 | 2.304206 | 3.017367 | 2.041996 | 2.268486 |
| 17499831 | Defb13    | defensin beta 13                                                   | 4.335024 | 3.580075 | 3.602254 | 5.223222 | 4.392249 | 3.02927  |
| 17499591 | Defb14    | defensin beta 14                                                   | 3.912688 | 3.724586 | 3.376082 | 4.075763 | 3.920343 | 4.125188 |
| 17507950 | Defb15    | defensin beta 15                                                   | 3.714299 | 4.464473 | 5.92843  | 3.857484 | 5.366866 | 3.255479 |
| 17221533 | Defb18    | defensin beta 18                                                   | 4.28163  | 3.285129 | 3.299437 | 3.908432 | 3.521744 | 4.523972 |
| 17392968 | Defb19    | defensin beta 19                                                   | 6.042644 | 4.350587 | 4.919597 | 5.433644 | 7.325057 | 4.864158 |
| 17499818 | Defb2     | defensin beta 2                                                    | 4.791542 | 3.454196 | 6.903701 | 4.038669 | 6.819425 | 2.752476 |
| 17377723 | Defb20    | defensin beta 20                                                   | 3.045481 | 3.039239 | 2.923872 | 2.614998 | 3.403172 | 2.54875  |
| 17377734 | Defb21    | defensin beta 21                                                   | 5.382178 | 2.847785 | 2.778218 | 3.38311  | 4.924953 | 3.832299 |
| 17392951 | Defb22    | defensin beta 22                                                   | 2.662442 | 3.042358 | 3.037617 | 3.049431 | 2.866241 | 3.031874 |
| 17392947 | Defb23    | defensin beta 23                                                   | 6.106476 | 6.895236 | 6.445222 | 6.450227 | 5.567656 | 5.68965  |
| 17392980 | Defb25    | defensin beta 25                                                   | 7.409006 | 7.362011 | 7.00085  | 7.153107 | 6.900926 | 8.552641 |
| 17392956 | Defb26    | defensin beta 26                                                   | 3.219753 | 2.914907 | 2.392717 | 2.935141 | 2.586839 | 2.70883  |
| 17377728 | Defb28    | defensin beta 28                                                   | 3.703322 | 4.397032 | 3.524503 | 4.19555  | 3.263862 | 3.703322 |
| 17392959 | Defb29    | defensin beta 29                                                   | 9.123011 | 7.817948 | 7.858043 | 9.019766 | 9.310251 | 8.407576 |
| 17499613 | Defb3     | defensin beta 3                                                    | 3.959011 | 3.335377 | 3.345009 | 3.806038 | 3.882296 | 2.874737 |
| 17307580 | Defb30    | defensin beta 30                                                   | 4.473084 | 4.392493 | 4.392493 | 4.661874 | 4.392493 | 4.415908 |
| 17499706 | Defb33    | defensin beta 33                                                   | 7.386034 | 5.628927 | 4.926763 | 5.496335 | 5.768115 | 6.331336 |
| 17499576 | Defb34    | defensin beta 34                                                   | 2.782767 | 2.582109 | 2.67402  | 2.582109 | 4.422463 | 2.847429 |
| 17377738 | Defb36    | defensin beta 36                                                   | 10.87369 | 12.54187 | 14.10515 | 11.2305  | 13.92601 | 13.38876 |
| 17507829 | Defb37    | defensin beta 37                                                   | 2.482855 | 2.168744 | 2.168744 | 3.119706 | 2.234172 | 2.285991 |
| 17507834 | Defb38    | defensin beta 38                                                   | 2.204269 | 1.804451 | 1.941296 | 2.088417 | 2.076509 | 2.598862 |
| 17507839 | Defb39    | defensin beta 39                                                   | 2.52251  | 2.580875 | 2.373128 | 2.474145 | 2.419837 | 3.437691 |
| 17499594 | Defb4     | defensin beta 4                                                    | 21.65953 | 25.22776 | 25.23755 | 18.0722  | 25.22776 | 29.2104  |
| 17507825 | Defb40    | defensin beta 40                                                   | 3.034292 | 2.458469 | 1.974682 | 2.393646 | 2.996836 | 2.606909 |
| 17301200 | Defb42    | defensin beta 42                                                   | 2.592385 | 1.972493 | 2.131354 | 2.458111 | 2.827486 | 2.620387 |
| 17301195 | Defb43    | defensin beta 43                                                   | 4.743691 | 4.972185 | 5.196787 | 7.122482 | 5.642091 | 6.575133 |
| 17221531 | Defb44-ps | defensin beta 44, pseudogene                                       | 2.241524 | 2.234032 | 2.045509 | 2.45139  | 2.53211  | 2.372108 |
| 17392973 | Defb45    | defensin beta 45                                                   | 5.48933  | 5.48933  | 4.751819 | 4.52667  | 6.066313 | 6.347815 |
| 17499607 | Defb46    | defensin beta 46                                                   | 2.544267 | 2.590553 | 2.475757 | 3.01584  | 2.82044  | 3.293633 |
| 17301192 | Defb47    | defensin beta 47                                                   | 10.05311 | 7.566573 | 9.256264 | 12.46378 | 10.31449 | 9.732834 |
| 17307575 | Defb48    | defensin beta 48                                                   | 4.792572 | 4.801649 | 5.160712 | 5.19812  | 4.948873 | 4.918574 |
| 17499703 | Gm21944   | defensin beta 48 pseudogene                                        | 2.406006 | 2.657408 | 2.336842 | 2.710295 | 2.406006 | 2.464013 |
| 17499610 | Defb5     | defensin beta 5                                                    | 4.385496 | 4.598043 | 4.404872 | 5.179705 | 5.77872  | 4.034333 |
| 17499813 | Defb50    | defensin beta 50                                                   | 2.337814 | 2.483974 | 2.937523 | 3.475065 | 2.346987 | 2.608843 |
| 17499602 | Defb6     | defensin beta 6                                                    | 2.90728  | 3.999861 | 3.374936 | 3.448001 | 4.006521 | 3.26038  |
| 17499622 | Defb7     | defensin beta 7                                                    | 18.01317 | 24.21585 | 20.29525 | 23.35565 | 21.57891 | 25.29201 |
| 17507847 | Defb8     | defensin beta 8                                                    | 7.23323  | 6.716828 | 6.685243 | 5.751347 | 7.660189 | 7.19792  |
| 17507940 | Defb9     | defensin beta 9                                                    | 6.40625  | 5.458294 | 4.945032 | 6.381121 | 8.596146 | 6.261507 |
| 17499792 | Defa17    | defensin, alpha, 17                                                | 3.29642  | 2.639638 | 4.342753 | 3.692812 | 3.907484 | 5.1169   |
| 17499768 | Defa20    | defensin, alpha, 20                                                | 8.61822  | 13.32257 | 10.79873 | 10.37256 | 9.027209 | 11.48389 |
| 17499710 | Defa21    | defensin, alpha, 21                                                | 15.51563 | 11.35133 | 9.077909 | 10.87196 | 13.88206 | 9.347496 |
| 17499739 | Defa22    | defensin, alpha, 22                                                | 5.121868 | 3.950184 | 5.208652 | 5.046174 | 6.449199 | 4.233409 |
| 17499728 | Defa23    | defensin, alpha, 23                                                | 7.786905 | 8.166738 | 7.160151 | 8.401052 | 7.088891 | 7.786905 |
| 17499744 | Defa23    | defensin, alpha, 23                                                | 7.870689 | 8.521752 | 7.237192 | 8.491445 | 7.083488 | 7.760502 |
| 17499803 | Defa24    | defensin, alpha, 24                                                | 12.85814 | 13.37262 | 10.20844 | 10.48954 | 13.86398 | 10.90033 |
| 17499736 | Defa25    | defensin, alpha, 25                                                | 6.790416 | 7.77283  | 7.810094 | 7.676454 | 7.444732 | 7.818436 |
| 17499788 | Defa26    | defensin, alpha, 26                                                | 7.734082 | 8.193671 | 10.02027 | 6.860435 | 9.197871 | 9.989621 |
| 17499757 | Defa3     | defensin, alpha, 3                                                 | 12.92973 | 25.78482 | 28.61124 | 19.0347  | 19.62866 | 19.49537 |
| 17499761 | Defa5     | defensin, alpha, 5                                                 | 4.790346 | 5.65411  | 4.681043 | 4.642011 | 5.694188 | 4.681043 |
| 17499800 | Defa-ps1  | defensin, alpha, pseudogene 1                                      | 3.741716 | 3.636171 | 3.703322 | 3.703322 | 4.308095 | 3.89464  |
| 17499599 | Defa-ps12 | defensin, alpha, pseudogene 12                                     | 2.544179 | 2.907965 | 2.301621 | 3.312155 | 2.953407 | 3.41378  |
| 17499617 | Defa-ps13 | defensin, alpha, pseudogene 13                                     | 1.833576 | 2.190515 | 2.133526 | 2.261218 | 2.068307 | 2.778815 |
| 17507910 | Defa-rs1  | defensin, alpha, related sequence 1                                | 10.27909 | 13.52391 | 11.24366 | 11.50086 | 8.718259 | 8.420524 |
| 17497854 | Deaf1     | deformed epidermal autoregulatory factor 1 (Drosophila)            | 38.70613 | 34.64055 | 36.96249 | 35.66211 | 32.89166 | 35.04872 |
| 17230595 | Degs1     | degenerative spermatocyte homolog 1 (Drosophila)                   | 110.9203 | 105.0943 | 100.3454 | 102.3608 | 89.39362 | 109.039  |
| 17283915 | Degs2     | degenerative spermatocyte homolog 2 (Drosophila), lipid desaturase | 6.801345 | 6.646892 | 6.801345 | 7.007501 | 8.152994 | 7.377541 |
| 17431152 | Dhdds     | dehydrodolichyl diphosphate synthase                               | 62.05132 | 55.33499 | 47.57033 | 47.79938 | 44.03931 | 47.79739 |
| 17381424 | Dhtkd1    | dehydrogenase E1 and transketolase domain containing 1             | 47.05545 | 69.68856 | 76.30047 | 76.5139  | 66.68082 | 93.75281 |
| 17306856 | Dhrs1     | dehydrogenase/reductase (SDR family) member 1                      | 212.9041 | 252.6611 | 237.1671 | 220.8159 | 185.7618 | 202.6407 |
| 17267066 | Dhrs11    | dehydrogenase/reductase (SDR family) member 11                     | 93.82757 | 89.78982 | 88.3446  | 89.78982 | 79.5875  | 74.05935 |
| 17253422 | Dhrs13    | dehydrogenase/reductase (SDR family) member 13                     | 5.239685 | 6.287864 | 6.251143 | 5.759486 | 6.287864 | 8.371522 |
| 17266319 | Dhrs13os  | dehydrogenase/reductase (SDR family) member 13, opposite strand    | 4.657514 | 4.221103 | 4.193137 | 4.635034 | 3.398976 | 5.145032 |
| 17421312 | Dhrs3     | dehydrogenase/reductase (SDR family) member 3                      | 193.3619 | 183.964  | 182.8631 | 198.7113 | 181.5068 | 220.4366 |
| 17300429 | Dhrs4     | dehydrogenase/reductase (SDR family) member 4                      | 283.8195 | 291.6572 | 285.6312 | 238.1274 | 250.3374 | 256.412  |

|          |          |                                                                        |          |          |          |          |          |          |
|----------|----------|------------------------------------------------------------------------|----------|----------|----------|----------|----------|----------|
| 17281843 | Dhrs7    | dehydrogenase/reductase (SDR family) member 7                          | 35.88328 | 42.73985 | 51.96434 | 36.63219 | 45.02049 | 44.44133 |
| 17250519 | Dhrs7b   | dehydrogenase/reductase (SDR family) member 7B                         | 54.16954 | 43.09444 | 45.31039 | 43.16111 | 51.53783 | 42.27843 |
| 17251264 | Dhrs7c   | dehydrogenase/reductase (SDR family) member 7C                         | 6.595811 | 4.126933 | 3.703322 | 5.031435 | 3.729055 | 4.498519 |
| 17371427 | Dhrs9    | dehydrogenase/reductase (SDR family) member 9                          | 53.41007 | 31.70723 | 36.04807 | 28.32256 | 20.87986 | 17.50494 |
| 17434073 | Dhrsx    | dehydrogenase/reductase (SDR family) X chromosome                      | 29.29414 | 30.42447 | 26.73912 | 32.53589 | 31.11655 | 36.24525 |
| 17300416 | Dhrs2    | dehydrogenase/reductase member 2                                       | 5.48933  | 5.48933  | 5.574838 | 5.213998 | 5.047259 | 5.333971 |
| 17278890 | Dio3     | deiodinase, iodothyronine type III                                     | 3.563364 | 3.788036 | 3.471069 | 3.430931 | 3.13912  | 2.812572 |
| 17283976 | Dio3os   | deiodinase, iodothyronine type III, opposite strand                    | 11.65858 | 17.18324 | 14.06161 | 12.17424 | 11.60078 | 17.84453 |
| 17427928 | Dio1     | deiodinase, iodothyronine, type I                                      | 230.0032 | 180.1906 | 261.7199 | 285.0755 | 267.4953 | 253.8021 |
| 17282970 | Dio2     | deiodinase, iodothyronine, type II                                     | 4.414928 | 5.481193 | 5.020531 | 4.206936 | 3.261261 | 5.423973 |
| 17292276 | Dek      | DEK oncogene (DNA binding)                                             | 50.56124 | 54.63146 | 51.43042 | 46.39894 | 55.8436  | 52.56498 |
| 17345880 | Dazl     | deleted in azoospermia-like                                            | 3.457837 | 4.01475  | 4.080483 | 4.674623 | 4.444312 | 3.326166 |
| 17355332 | Dcc      | deleted in colorectal carcinoma                                        | 4.282965 | 4.172349 | 4.20927  | 4.180223 | 4.113852 | 5.516296 |
| 17508804 | Dlc1     | deleted in liver cancer 1                                              | 66.92902 | 72.16113 | 76.85248 | 72.14412 | 78.21861 | 59.09032 |
| 17522998 | Dlec1    | deleted in lung and esophageal cancer 1                                | 3.995428 | 7.349367 | 6.287864 | 6.794889 | 5.989934 | 7.332016 |
| 17307502 | Dleu2    | deleted in lymphocytic leukemia, 2                                     | 18.81146 | 15.66399 | 22.16129 | 22.98833 | 19.53162 | 29.25599 |
| 17547825 | Dleu2    | deleted in lymphocytic leukemia, 2 [Source:MGI Symbol;Acc:MGI:1934030] | 14.57749 | 23.20735 | 19.28129 | 19.44396 | 23.64937 | 23.41401 |
| 17307522 | Dleu7    | deleted in lymphocytic leukemia, 7                                     | 4.20927  | 5.539478 | 3.905507 | 4.829822 | 3.405791 | 4.351944 |
| 17483925 | Dmbt1    | deleted in malignant brain tumors 1                                    | 2.259463 | 3.049579 | 3.049579 | 2.938643 | 3.049579 | 2.996545 |
| 17359858 | Dpcd     | deleted in primary ciliary dyskinesia                                  | 24.50697 | 19.42873 | 17.18645 | 17.53202 | 21.08449 | 22.43983 |
| 17224977 | Dner     | delta/notch-like EGF repeat containing                                 | 4.94517  | 3.460331 | 4.20927  | 4.20927  | 3.508879 | 5.010692 |
| 17341179 | Dll1     | delta-like 1 (Drosophila)                                              | 10.09193 | 10.01444 | 8.112013 | 10.70298 | 9.948921 | 10.86458 |
| 17278647 | Dlk1     | delta-like 1 homolog (Drosophila)                                      | 5.009581 | 5.069347 | 5.775276 | 5.54305  | 5.069347 | 4.191946 |
| 17338071 | Dlk2     | delta-like 2 homolog (Drosophila)                                      | 9.843627 | 10.11988 | 9.17215  | 7.31709  | 7.364206 | 8.947037 |
| 17488379 | Dll3     | delta-like 3 (Drosophila)                                              | 6.557155 | 5.117574 | 5.511748 | 6.1597   | 5.451526 | 4.577056 |
| 17374792 | Dll4     | delta-like 4 (Drosophila)                                              | 12.15544 | 12.76481 | 16.59803 | 12.82138 | 12.59143 | 11.4999  |
| 17452038 | Dtx1     | deltex 1 homolog (Drosophila)                                          | 22.32085 | 13.82119 | 15.37101 | 15.37101 | 11.91858 | 15.13388 |
| 17443363 | Dtx2     | deltex 2 homolog (Drosophila)                                          | 13.48684 | 13.78283 | 15.27425 | 14.20218 | 12.84976 | 13.47945 |
| 17245772 | Dtx3     | deltex 3 homolog (Drosophila)                                          | 10.73024 | 12.59029 | 16.2525  | 11.12991 | 9.310251 | 11.24366 |
| 17330119 | Dtx3l    | deltex 3-like (Drosophila)                                             | 78.33526 | 72.54428 | 74.63653 | 85.98601 | 62.81077 | 73.2131  |
| 17363086 | Dtx4     | deltex 4 homolog (Drosophila)                                          | 32.76106 | 29.13134 | 25.83993 | 31.63435 | 24.93534 | 25.60884 |
| 17308413 | Dmtn     | dematin actin binding protein                                          | 7.919119 | 7.406644 | 6.992896 | 6.992896 | 7.277283 | 6.702132 |
| 17495553 | Coq7     | demethyl-Q 7                                                           | 30.18668 | 31.63391 | 30.23086 | 37.03378 | 45.78173 | 41.76869 |
| 17334166 | Dcpp1    | demilune cell and parotid protein 1                                    | 6.47666  | 5.871219 | 6.110795 | 5.402548 | 4.494373 | 3.792003 |
| 17334172 | Dcpp2    | demilune cell and parotid protein 2                                    | 18.16312 | 9.903716 | 15.23914 | 19.69326 | 16.54152 | 15.31008 |
| 17334178 | Dcpp3    | demilune cell and parotid protein 3                                    | 8.060727 | 10.67349 | 11.55704 | 15.98825 | 11.08249 | 11.15694 |
| 17321346 | Ddn      | dendrin                                                                | 4.115934 | 7.181424 | 4.638859 | 7.14607  | 5.203924 | 5.550547 |
| 17384659 | Dennd1a  | DENN/MADD domain containing 1A                                         | 47.33056 | 56.81776 | 59.1481  | 49.50938 | 37.80775 | 41.46005 |
| 17217854 | Dennd1b  | DENN/MADD domain containing 1B                                         | 34.84211 | 31.15172 | 29.60153 | 31.29434 | 30.56122 | 32.31988 |
| 17327445 | Dennd1b  | DENN/MADD domain containing 1B                                         | 3.462322 | 3.462322 | 3.462322 | 3.260312 | 3.462322 | 3.630202 |
| 17346477 | Dennd1c  | DENN/MADD domain containing 1C                                         | 9.108289 | 12.50133 | 10.05004 | 8.51685  | 6.301783 | 8.372799 |
| 17466142 | Dennd2a  | DENN/MADD domain containing 2A                                         | 8.274947 | 7.698994 | 9.290911 | 9.488237 | 11.05364 | 9.290911 |
| 17401144 | Dennd2c  | DENN/MADD domain containing 2C                                         | 3.432715 | 4.20927  | 4.20927  | 4.509633 | 4.834075 | 4.33809  |
| 17401480 | Dennd2d  | DENN/MADD domain containing 2D                                         | 13.32358 | 13.4717  | 16.29808 | 12.66127 | 14.60186 | 14.13118 |
| 17312097 | Dennd3   | DENN/MADD domain containing 3                                          | 14.83847 | 17.09864 | 16.76302 | 14.20296 | 15.28919 | 16.82681 |
| 17518378 | Dennd4a  | DENN/MADD domain containing 4A                                         | 100.001  | 107.7661 | 107.687  | 91.32956 | 103.3855 | 97.62779 |
| 17399702 | Dennd4b  | DENN/MADD domain containing 4B                                         | 13.75973 | 12.84683 | 13.524   | 13.25339 | 13.524   | 14.39943 |
| 17415181 | Dennd4c  | DENN/MADD domain containing 4C                                         | 81.45267 | 91.15753 | 79.73217 | 77.07174 | 76.58606 | 79.69239 |
| 17494978 | Dennd5a  | DENN/MADD domain containing 5A                                         | 83.41818 | 75.89064 | 81.94136 | 67.40903 | 58.47386 | 58.67199 |
| 17473061 | Dennd5b  | DENN/MADD domain containing 5B                                         | 104.4175 | 132.1562 | 131.096  | 108.2002 | 148.0038 | 126.6365 |
| 17297889 | Dennd6a  | DENN/MADD domain containing 6A                                         | 80.8648  | 82.1609  | 78.50268 | 82.1609  | 80.29677 | 75.73824 |
| 17320389 | Dennd6b  | DENN/MADD domain containing 6B                                         | 14.98451 | 12.56693 | 16.16924 | 14.97184 | 14.18211 | 14.34603 |
| 17442401 | Denr     | density-regulated protein                                              | 102.1539 | 87.03417 | 89.72947 | 84.67123 | 104.6878 | 80.89452 |
| 17231066 | Dtl      | denticless homolog (Drosophila)                                        | 3.439908 | 3.664408 | 3.885742 | 3.622335 | 4.350647 | 3.622335 |
| 17439805 | Dmp1     | dentin matrix protein 1                                                | 5.36709  | 4.24231  | 4.293666 | 3.699858 | 4.867463 | 4.137531 |
| 17439797 | Dspp     | dentin sialophosphoprotein                                             | 5.595318 | 5.795809 | 5.626899 | 5.120306 | 3.940121 | 5.62881  |
| 17311251 | Dcstamp  | dentocyte expressed seven transmembrane protein                        | 5.958173 | 6.189187 | 4.846825 | 5.392185 | 5.972066 | 5.820044 |
| 17348823 | Dck      | deoxycytidine kinase                                                   | 16.26264 | 15.20686 | 15.35972 | 15.17737 | 15.43464 | 14.19716 |
| 17468172 | Dguok    | deoxyguanosine kinase                                                  | 29.07385 | 31.33168 | 27.05831 | 28.12907 | 28.40041 | 23.7226  |
| 17235714 | Dohh     | deoxyhypusine hydroxylase/monooxygenase                                | 13.63998 | 13.39423 | 13.39423 | 16.08942 | 13.39423 | 13.29766 |
| 17503377 | Dhps     | deoxyhypusine synthase                                                 | 8.001886 | 9.351061 | 9.668888 | 12.08345 | 11.50939 | 10.78213 |
| 17359421 | Dntt     | deoxynucleotidyltransferase, terminal                                  | 4.69121  | 5.229453 | 5.235473 | 4.620824 | 4.704952 | 5.388748 |
| 17379503 | Dnttip1  | deoxynucleotidyltransferase, terminal, interacting protein 1           | 48.70946 | 51.393   | 53.98213 | 60.63337 | 56.43389 | 49.82266 |
| 17402296 | Dnttip2  | deoxynucleotidyltransferase, terminal, interacting protein 2           | 30.73797 | 33.04477 | 33.55952 | 35.45482 | 25.51493 | 27.32955 |
| 17542642 | Dnase1l1 | deoxyribonuclease 1-like 1                                             | 13.30319 | 14.03007 | 15.23914 | 15.06815 | 11.56401 | 13.0165  |
| 17341843 | Dnase1l2 | deoxyribonuclease 1-like 2                                             | 6.327125 | 6.644037 | 6.402609 | 7.918735 | 7.596106 | 6.964936 |
| 17303386 | Dnase1l3 | deoxyribonuclease 1-like 3                                             | 126.7577 | 105.8274 | 161.4944 | 116.827  | 65.48942 | 86.55348 |
| 17322507 | Dnase1   | deoxyribonuclease I                                                    | 7.707484 | 8.781394 | 7.840904 | 7.29678  | 6.916777 | 7.29678  |
| 17503260 | Dnase2a  | deoxyribonuclease II alpha                                             | 30.7644  | 30.83507 | 28.45361 | 24.63794 | 20.84429 | 18.28197 |
| 17411020 | Dnase2b  | deoxyribonuclease II beta                                              | 69.42291 | 67.9099  | 68.34387 | 48.48646 | 82.62807 | 69.42291 |
| 17225785 | Dtymk    | deoxythymidylate kinase                                                | 22.28715 | 20.10065 | 21.98747 | 21.81124 | 22.35553 | 22.65315 |
| 17375641 | Dut      | deoxyuridine triphosphatase                                            | 28.55715 | 33.37972 | 28.35674 | 33.06654 | 26.9406  | 29.20857 |
| 17375651 | Dut      | deoxyuridine triphosphatase                                            | 2.76759  | 2.406006 | 2.223404 | 2.458111 | 2.439773 | 2.607523 |
| 17403919 | Depdc1a  | DEP domain containing 1a                                               | 2.640608 | 2.557457 | 3.146788 | 2.860565 | 3.181308 | 2.953407 |
| 17289728 | Depdc1b  | DEP domain containing 1B                                               | 4.184311 | 4.526638 | 4.248431 | 3.263862 | 4.454736 | 3.568555 |
| 17436345 | Depdc5   | DEP domain containing 5                                                | 30.56694 | 24.77426 | 28.00534 | 28.94495 | 20.39665 | 27.58343 |
| 17388974 | Depdc7   | DEP domain containing 7                                                | 59.79819 | 55.16113 | 45.1887  | 54.23228 | 60.8152  | 58.56107 |
| 17311533 | Deptor   | DEP domain containing MTOR-interacting protein                         | 260.4062 | 268.0354 | 290.1248 | 272.3164 | 236.2647 | 239.1546 |
| 17547877 | Deptor   | DEP domain containing MTOR-interacting protein                         | 128.6395 | 165.0913 | 145.4581 | 164.9769 | 170.7616 | 163.9725 |
| 17270398 | Dcackd   | dephospho-CoA kinase domain containing                                 | 58.90222 | 58.90222 | 63.37096 | 58.90222 | 49.5444  | 56.69855 |
| 17317203 | Der1l    | Der1-like domain family, member 1                                      | 254.5138 | 217.6219 | 191.9744 | 183.1612 | 221.3415 | 157.2722 |
| 17265451 | Der1l    | Der1-like domain family, member 2                                      | 62.38987 | 43.94813 | 39.84371 | 47.24959 | 47.24959 | 52.41726 |
| 17234423 | Der1l    | Der1-like domain family, member 3                                      | 14.70587 | 14.2274  | 8.702139 | 8.367287 | 6.794041 | 7.134093 |
| 17240190 | Dse      | dermatan sulfate epimerase                                             | 21.03179 | 24.70943 | 28.29451 | 19.60446 | 17.67453 | 22.07345 |

|          |         |                                                                                 |          |          |          |          |          |          |
|----------|---------|---------------------------------------------------------------------------------|----------|----------|----------|----------|----------|----------|
| 17226142 | Dsel    | dermatan sulfate epimerase-like                                                 | 7.182719 | 6.091257 | 5.617429 | 4.924441 | 3.681822 | 5.585707 |
| 17218927 | Dpt     | dermatopontin                                                                   | 21.37837 | 17.67955 | 25.69775 | 26.73893 | 14.75948 | 19.93815 |
| 17476535 | Dmkn    | dermokine                                                                       | 5.080604 | 4.54585  | 5.222715 | 4.54585  | 4.549632 | 4.587697 |
| 17321434 | Dhh     | desert hedgehog                                                                 | 5.792355 | 5.792355 | 6.834094 | 6.279066 | 5.464881 | 5.159531 |
| 17214476 | Des     | desmin                                                                          | 7.244871 | 12.35189 | 13.78054 | 10.70045 | 8.283899 | 9.865759 |
| 17352957 | Dsc1    | desmocollin 1                                                                   | 4.191539 | 3.199619 | 3.263862 | 3.686419 | 3.148686 | 2.944433 |
| 17352933 | Dsc2    | desmocollin 2                                                                   | 81.14442 | 79.76755 | 81.82615 | 78.28533 | 93.49064 | 97.18825 |
| 17352913 | Dsc3    | desmocollin 3                                                                   | 3.302274 | 2.968821 | 3.298957 | 3.753353 | 3.753353 | 4.421635 |
| 17348726 | Dsg1a   | desmoglein 1 alpha                                                              | 6.293532 | 6.227961 | 4.789583 | 7.807063 | 5.849162 | 4.705474 |
| 17348745 | Dsg1b   | desmoglein 1 beta                                                               | 3.155897 | 4.151981 | 3.708228 | 3.20499  | 3.268639 | 2.865884 |
| 17348707 | Dsg1c   | desmoglein 1 gamma                                                              | 2.911071 | 3.25977  | 2.344808 | 3.375193 | 6.57992  | 4.886969 |
| 17348812 | Dsg2    | desmoglein 2                                                                    | 180.5119 | 198.7499 | 192.2833 | 189.0796 | 229.855  | 185.8945 |
| 17348791 | Dsg3    | desmoglein 3                                                                    | 3.662072 | 3.808044 | 3.98246  | 3.97226  | 4.87844  | 4.280502 |
| 17348765 | Dsg4    | desmoglein 4                                                                    | 3.830148 | 3.731097 | 5.283339 | 3.345774 | 7.082605 | 3.84779  |
| 17286641 | Dsp     | desmoplakin                                                                     | 91.14743 | 97.43377 | 85.6333  | 81.6941  | 92.90923 | 77.91828 |
| 17377013 | Dstrn   | destrin                                                                         | 344.9611 | 358.9303 | 384.5534 | 361.4444 | 370.2433 | 364.3421 |
| 17319565 | Desi1   | desumoylating isopeptidase 1                                                    | 70.24677 | 60.0266  | 61.95677 | 58.57568 | 61.14828 | 63.92817 |
| 17219963 | Desi2   | desumoylating isopeptidase 2                                                    | 13.09442 | 12.70188 | 12.86260 | 10.36336 | 10.52217 | 9.228461 |
| 17219974 | Desi2   | desumoylating isopeptidase 2                                                    | 5.100399 | 5.100399 | 5.196391 | 7.073038 | 5.100399 | 4.437171 |
| 17502196 | Dda1    | DET1 and DDB1 associated 1                                                      | 26.29178 | 27.79725 | 23.99513 | 25.86645 | 20.49287 | 26.59181 |
| 17491396 | Dbx1    | developing brain homeobox 1                                                     | 6.619811 | 6.44835  | 7.294302 | 7.274459 | 6.992896 | 6.289608 |
| 17320844 | Dbx2    | developing brain homeobox 2                                                     | 3.506423 | 4.003911 | 3.908513 | 3.692659 | 4.108694 | 3.540149 |
| 17262127 | Dppa1   | developmental pluripotency associated 1                                         | 3.03158  | 3.445683 | 2.751503 | 4.910773 | 3.736817 | 3.445683 |
| 17326021 | Dppa2   | developmental pluripotency associated 2                                         | 4.697034 | 3.851766 | 4.723349 | 4.553765 | 3.950869 | 4.857756 |
| 17326011 | Dppa4   | developmental pluripotency associated 4                                         | 6.321557 | 6.971939 | 8.119776 | 4.748889 | 5.690084 | 5.992218 |
| 17529029 | Dppa5a  | developmental pluripotency associated 5A                                        | 5.178162 | 6.398217 | 5.481725 | 5.564916 | 5.331753 | 5.409968 |
| 17462686 | Dppa3   | developmental pluripotency-associated 3                                         | 9.158365 | 8.160797 | 5.71257  | 8.467934 | 8.710104 | 9.257355 |
| 17259748 | Drg1    | developmentally regulated GTP binding protein 1                                 | 70.89146 | 73.48613 | 67.01165 | 76.17945 | 88.36542 | 75.72827 |
| 17250374 | Drg2    | developmentally regulated GTP binding protein 2                                 | 76.99538 | 75.27923 | 73.7433  | 76.31792 | 74.52177 | 78.3521  |
| 17540376 | Drr1    | developmentally regulated repeat element-containing transcript 1 [Source:MG1 Sy | 4.426204 | 3.601006 | 4.607806 | 2.75074  | 3.960218 | 3.355691 |
| 17328093 | Dexi    | dexamethasone-induced transcript                                                | 84.97403 | 58.28691 | 43.7891  | 73.80261 | 55.62841 | 54.34178 |
| 17269595 | Dhx58   | DEXH (Asp-Glu-X-His) box polypeptide 58                                         | 23.69236 | 25.96111 | 23.2684  | 30.06494 | 23.79044 | 30.66413 |
| 17452615 | Diablo  | diablo homolog (Drosophila)                                                     | 29.11156 | 30.42172 | 27.43584 | 28.68769 | 30.36211 | 27.47676 |
| 17532755 | Dgkk    | diacylglycerol kinase kappa                                                     | 4.20927  | 4.20927  | 4.20927  | 4.451156 | 5.546432 | 4.649095 |
| 17388293 | Dgkz    | diacylglycerol kinase zeta                                                      | 31.29434 | 29.78843 | 35.29349 | 31.71031 | 36.14314 | 28.90886 |
| 17246310 | Dgka    | diacylglycerol kinase, alpha                                                    | 29.59907 | 36.81751 | 45.97922 | 48.78379 | 24.62907 | 35.47326 |
| 17275090 | Dgkb    | diacylglycerol kinase, beta                                                     | 2.953407 | 2.646306 | 2.913837 | 3.263862 | 3.44683  | 3.040145 |
| 17215395 | Dgkd    | diacylglycerol kinase, delta                                                    | 28.65133 | 34.7129  | 31.4701  | 27.74085 | 32.0973  | 32.38155 |
| 17267632 | Dgke    | diacylglycerol kinase, epsilon                                                  | 4.343476 | 5.700467 | 5.700467 | 5.503846 | 5.436507 | 5.137975 |
| 17255042 | Dgkeos  | diacylglycerol kinase, epsilon, opposite strand                                 | 13.12622 | 12.9694  | 13.3553  | 16.26242 | 13.78178 | 13.33337 |
| 17308842 | Dgkh    | diacylglycerol kinase, eta                                                      | 21.8762  | 26.95629 | 40.45483 | 22.87675 | 22.15853 | 21.3078  |
| 17329316 | Dgkg    | diacylglycerol kinase, gamma                                                    | 3.696116 | 4.153075 | 3.486695 | 4.517016 | 4.189157 | 4.57287  |
| 17465865 | Dgki    | diacylglycerol kinase, iota                                                     | 7.102466 | 7.238295 | 6.121775 | 7.587423 | 7.258342 | 7.587423 |
| 17450802 | Dgkq    | diacylglycerol kinase, theta                                                    | 12.65916 | 12.10566 | 13.32801 | 13.8097  | 12.83383 | 13.09442 |
| 17362646 | Dagla   | diacylglycerol lipase, alpha                                                    | 8.339553 | 9.915462 | 11.4158  | 9.196532 | 9.201825 | 10.05325 |
| 17444346 | Daglb   | diacylglycerol lipase, beta                                                     | 63.11846 | 56.70799 | 53.45044 | 58.95    | 53.07866 | 59.66984 |
| 17318502 | Dgat1   | diacylglycerol O-acyltransferase 1                                              | 24.84563 | 22.92119 | 22.37305 | 25.49443 | 21.20364 | 32.10776 |
| 17493632 | Dgat2   | diacylglycerol O-acyltransferase 2                                              | 347.7604 | 373.3332 | 416.7909 | 411.1469 | 502.4548 | 479.5675 |
| 17536527 | Dgat2l6 | diacylglycerol O-acyltransferase 2-like 6                                       | 3.462322 | 2.768741 | 3.907105 | 2.988145 | 3.691866 | 3.171554 |
| 17458424 | Doxl2   | diamine oxidase-like protein 2                                                  | 3.611179 | 4.05373  | 4.025171 | 4.287718 | 4.05373  | 4.05373  |
| 17353806 | Diaph1  | diaphanous related formin 1                                                     | 67.03627 | 68.42777 | 78.98463 | 58.94878 | 65.85997 | 66.26614 |
| 17537537 | Diaph2  | diaphanous related formin 2                                                     | 67.76695 | 59.16081 | 66.98982 | 69.24942 | 62.6004  | 69.17218 |
| 17308965 | Diaph3  | diaphanous related formin 3                                                     | 5.125917 | 6.011021 | 5.402286 | 5.76268  | 5.73141  | 6.506583 |
| 17226302 | Dbi     | diazepam binding inhibitor                                                      | 57.42432 | 58.20293 | 60.95658 | 50.38212 | 57.49003 | 61.0496  |
| 17253145 | Dbil5   | diazepam binding inhibitor-like 5                                               | 5.559519 | 5.300432 | 5.74565  | 5.970907 | 6.103091 | 5.423597 |
| 17273292 | Dcxr    | dicarbonyl L-xylulose reductase                                                 | 54.88614 | 65.58755 | 65.53892 | 76.27086 | 85.08306 | 89.26174 |
| 17283691 | Dicer1  | dicer 1, ribonuclease type III                                                  | 44.46105 | 55.37028 | 49.15002 | 58.46373 | 51.75513 | 53.97876 |
| 17363895 | Dkk1    | dickkopf homolog 1 (Xenopus laevis)                                             | 7.155041 | 7.890846 | 5.871219 | 7.416919 | 5.070894 | 6.495903 |
| 17402698 | Dkk2    | dickkopf homolog 2 (Xenopus laevis)                                             | 5.191675 | 5.48933  | 7.655783 | 5.48933  | 4.793967 | 6.435758 |
| 17495191 | Dkk3    | dickkopf homolog 3 (Xenopus laevis)                                             | 17.56766 | 16.09968 | 14.08698 | 15.4995  | 14.84628 | 12.07173 |
| 17499949 | Dkk4    | dickkopf homolog 4 (Xenopus laevis)                                             | 6.843005 | 6.423235 | 6.992896 | 6.843005 | 6.030928 | 6.843005 |
| 17490695 | Dkk1l   | dickkopf-like 1                                                                 | 5.173318 | 3.936436 | 4.379997 | 4.379997 | 4.197703 | 4.452668 |
| 17428501 | Dmbx1   | diencephalon/mesencephalon homeobox 1                                           | 3.902909 | 4.405147 | 4.569005 | 4.006327 | 5.148171 | 5.974011 |
| 17523326 | Deb1    | differentially expressed in B16F10 1                                            | 75.86381 | 58.02771 | 52.48343 | 62.93846 | 88.26625 | 84.13826 |
| 17335281 | Def6    | differentially expressed in FDCP 6                                              | 6.704548 | 6.830684 | 5.048903 | 5.963214 | 5.562333 | 6.557019 |
| 17506639 | Def8    | differentially expressed in FDCP 8                                              | 53.72308 | 49.7133  | 54.38813 | 53.03637 | 44.51563 | 53.57062 |
| 17438180 | Dancr   | differentiation antagonizing non-protein coding RNA                             | 6.212397 | 6.992896 | 6.992896 | 7.030757 | 6.992896 | 7.127173 |
| 17344349 | Dpcr1   | diffuse panbronchiolitis critical region 1 (human)                              | 6.349399 | 5.552471 | 5.983958 | 6.943774 | 6.019068 | 5.601332 |
| 17328810 | Dgcr14  | DiGeorge syndrome critical region gene 14                                       | 20.8388  | 23.80001 | 27.35192 | 24.64478 | 18.8322  | 26.29342 |
| 17328792 | Dgcr2   | DiGeorge syndrome critical region gene 2                                        | 55.1856  | 51.9701  | 60.1032  | 55.25641 | 51.71318 | 53.91781 |
| 17323632 | Dgcr6   | DiGeorge syndrome critical region gene 6                                        | 29.70513 | 33.18156 | 32.63776 | 28.45598 | 38.34828 | 31.06461 |
| 17328897 | Dgcr8   | DiGeorge syndrome critical region gene 8                                        | 18.51907 | 18.20307 | 22.12553 | 18.69188 | 19.21951 | 17.8376  |
| 17231188 | Diexf   | digestive organ expansion factor homolog (zebrafish)                            | 23.94446 | 19.38623 | 24.05208 | 23.07502 | 24.78525 | 24.31088 |
| 17490848 | Dhdh    | dihydrodiol dehydrogenase (dimeric)                                             | 392.718  | 363.6886 | 307.8961 | 329.152  | 260.9645 | 289.47   |
| 17289085 | Dhfr    | dihydrofolate reductase                                                         | 62.34708 | 54.0293  | 38.30551 | 50.1612  | 67.34178 | 61.0183  |
| 17402025 | Dbt     | dihydrolipoamide branched chain transacylase E2                                 | 214.9906 | 210.9606 | 209.4889 | 240.4228 | 237.814  | 272.2277 |
| 17280498 | Dld     | dihydrolipoamide dehydrogenase                                                  | 341.1329 | 302.6256 | 275.6435 | 301.8044 | 287.5024 | 329.5469 |
| 17526861 | Dlat    | dihydrolipoamide S-acetyltransferase (E2 component of pyruvate dehydrogenase (  | 56.0946  | 46.19068 | 45.49859 | 53.26736 | 48.80848 | 62.34535 |
| 17277352 | Dlst    | dihydrolipoamide S-succinyltransferase (E2 component of 2-oxo-glutarate comple  | 284.1601 | 304.2915 | 294.6279 | 320.6532 | 214.7389 | 275.2598 |
| 17512816 | Dhodh   | dihydroorotate dehydrogenase                                                    | 16.59757 | 15.34791 | 15.2058  | 17.32904 | 16.74119 | 20.24467 |
| 17316739 | Dpys    | dihydropyrimidinase                                                             | 245.1702 | 272.5808 | 272.5808 | 295.1613 | 316.9299 | 286.925  |
| 17307905 | Dpysl2  | dihydropyrimidinase-like 2                                                      | 29.59907 | 32.17615 | 39.16112 | 32.53859 | 20.1019  | 30.34696 |
| 17354101 | Dpysl3  | dihydropyrimidinase-like 3                                                      | 9.712482 | 8.304366 | 11.15741 | 9.620087 | 9.807259 | 7.487012 |
| 17548074 | Dpysl3  | dihydropyrimidinase-like 3                                                      | 24.29454 | 24.42675 | 27.60504 | 23.02757 | 25.22776 | 24.95436 |

|          |              |                                                                            |          |          |          |          |          |          |
|----------|--------------|----------------------------------------------------------------------------|----------|----------|----------|----------|----------|----------|
| 17484331 | Dpysl4       | dihydropyrimidinase-like 4                                                 | 12.09769 | 10.53749 | 10.36307 | 10.15635 | 7.091938 | 10.14671 |
| 17435834 | Dpysl5       | dihydropyrimidinase-like 5                                                 | 8.070343 | 7.698994 | 9.100653 | 7.68689  | 8.763942 | 9.102861 |
| 17402113 | Dpyd         | dihydropyrimidine dehydrogenase                                            | 695.2076 | 718.0945 | 716.2205 | 709.6186 | 811.6084 | 823.035  |
| 17273328 | Dus1l        | dihydrouridine synthase 1-like (S. cerevisiae)                             | 85.01526 | 82.37759 | 75.08381 | 78.37328 | 72.89157 | 76.37561 |
| 17505013 | Dus2         | dihydrouridine synthase 2                                                  | 19.8466  | 20.1619  | 20.1619  | 19.52648 | 20.1619  | 20.13942 |
| 17338882 | Dus3l        | dihydrouridine synthase 3-like (S. cerevisiae)                             | 20.31326 | 20.70719 | 20.88406 | 17.41115 | 18.90348 | 20.14025 |
| 17280561 | Dus4l        | dihydrouridine synthase 4-like (S. cerevisiae)                             | 10.67053 | 9.79829  | 8.836224 | 9.79829  | 9.153922 | 10.38026 |
| 17289660 | Dimt1        | DIM1 dimethyladenosine transferase 1-like (S. cerevisiae)                  | 15.22151 | 16.26445 | 15.14427 | 18.29275 | 17.16526 | 15.94442 |
| 17403439 | Ddah1        | dimethylarginine dimethylaminohydrolase 1                                  | 335.7352 | 393.9449 | 386.2524 | 325.7091 | 285.1842 | 366.9348 |
| 17336906 | Ddah2        | dimethylarginine dimethylaminohydrolase 2                                  | 12.97974 | 10.03167 | 11.3711  | 11.75343 | 10.98163 | 13.01813 |
| 17289163 | Dmgdh        | dimethylglycine dehydrogenase precursor                                    | 437.0305 | 364.8349 | 406.5503 | 436.9578 | 556.1653 | 546.2736 |
| 17242046 | Dip2a        | DIP2 disco-interacting protein 2 homolog A (Drosophila)                    | 9.999181 | 10.41665 | 10.99579 | 13.21899 | 9.46131  | 10.41665 |
| 17314929 | Dip2b        | DIP2 disco-interacting protein 2 homolog B (Drosophila)                    | 18.06543 | 23.43398 | 20.83432 | 19.50457 | 22.53866 | 26.37447 |
| 17285097 | Dip2c        | DIP2 disco-interacting protein 2 homolog C (Drosophila)                    | 39.78658 | 30.99041 | 39.70779 | 33.60304 | 35.67026 | 36.32976 |
| 17506532 | Dpep1        | dipeptidase 1 (renal)                                                      | 7.771591 | 5.300432 | 5.300432 | 5.656149 | 4.408537 | 5.240484 |
| 17512611 | Dpep2        | dipeptidase 2                                                              | 8.531799 | 8.162098 | 6.423858 | 6.749778 | 6.749778 | 6.087036 |
| 17512628 | Dpep2        | dipeptidase 2                                                              | 9.658372 | 12.95449 | 11.60311 | 11.95473 | 24.31728 | 18.58775 |
| 17512598 | Dpep3        | dipeptidase 3                                                              | 6.546437 | 6.288213 | 5.990556 | 5.882625 | 5.981387 | 5.751068 |
| 17242637 | Dpp10        | dipeptidylpeptidase 10                                                     | 2.922514 | 3.103401 | 3.324736 | 3.080981 | 3.037722 | 3.348303 |
| 17361404 | Dpp3         | dipeptidylpeptidase 3                                                      | 117.5035 | 101.1835 | 110.9249 | 103.5167 | 92.64813 | 87.44718 |
| 17385719 | Dpp4         | dipeptidylpeptidase 4                                                      | 168.2439 | 180.9855 | 174.1661 | 172.5834 | 158.862  | 211.164  |
| 17435528 | Dpp6         | dipeptidylpeptidase 6                                                      | 3.551578 | 4.296435 | 3.540124 | 3.173225 | 3.212063 | 3.670839 |
| 17382533 | Dpp7         | dipeptidylpeptidase 7                                                      | 17.38764 | 20.29525 | 23.11857 | 20.29525 | 16.43409 | 15.75437 |
| 17518434 | Dpp8         | dipeptidylpeptidase 8                                                      | 115.0726 | 116.1608 | 110.4141 | 105.5974 | 92.7278  | 111.142  |
| 17346185 | Dpp9         | dipeptidylpeptidase 9                                                      | 71.69    | 67.20189 | 67.06881 | 70.6506  | 76.9207  | 61.78523 |
| 17390490 | Ppip5k1      | diphosphoinositol pentakisphosphate kinase 1                               | 10.13933 | 11.71122 | 9.309218 | 8.948029 | 10.04176 | 11.35086 |
| 17225893 | Ppip5k2      | diphosphoinositol pentakisphosphate kinase 2                               | 99.12314 | 72.98864 | 72.31685 | 89.91999 | 94.37809 | 75.05363 |
| 17367750 | Dph7         | diphthamine biosynthesis 7                                                 | 6.380414 | 7.17252  | 7.161491 | 7.715288 | 7.261965 | 7.349876 |
| 17304850 | Dph3         | diphthamine biosynthesis 3                                                 | 28.3314  | 24.51104 | 21.23467 | 26.27174 | 21.10086 | 29.01124 |
| 17389578 | Dph6         | diphthamine biosynthesis 6                                                 | 29.54496 | 33.06676 | 28.86001 | 38.16452 | 27.05831 | 37.26734 |
| 17243157 | Diras1       | DIRAS family, GTP-binding RAS-like 1                                       | 23.52283 | 25.96111 | 22.9775  | 26.46897 | 19.64159 | 25.96111 |
| 17292598 | Diras2       | DIRAS family, GTP-binding RAS-like 2                                       | 6.82666  | 6.82666  | 6.968509 | 6.82666  | 6.735617 | 7.622583 |
| 17309070 | Dis3         | DIS3 mitotic control homolog (S. cerevisiae)                               | 44.46166 | 42.19587 | 43.1647  | 36.95275 | 36.55609 | 34.08819 |
| 17528175 | Dis3l        | DIS3 mitotic control homolog (S. cerevisiae)-like                          | 28.03583 | 28.03583 | 26.73523 | 28.21245 | 26.49448 | 28.03583 |
| 17215137 | Dis3l2       | DIS3 mitotic control homolog (S. cerevisiae)-like 2                        | 27.09454 | 32.32929 | 27.68764 | 25.94815 | 24.95834 | 25.93197 |
| 17416162 | Dab1         | disabled 1                                                                 | 4.93962  | 5.300432 | 4.779832 | 6.440845 | 3.912742 | 4.693226 |
| 17370234 | Dab2ip       | disabled 2 interacting protein                                             | 15.33366 | 15.07567 | 15.85043 | 13.69417 | 16.81504 | 14.37958 |
| 17309935 | Dab2         | disabled 2, mitogen-responsive phosphoprotein                              | 37.71143 | 45.59046 | 50.87588 | 31.50699 | 25.35995 | 30.08078 |
| 17344405 | Ddr1         | discoidin domain receptor family, member 1                                 | 28.29451 | 26.70245 | 35.54291 | 24.16254 | 19.85706 | 16.82355 |
| 17229481 | Ddr2         | discoidin domain receptor family, member 2                                 | 15.97562 | 12.58192 | 16.97595 | 12.08244 | 9.199338 | 8.759388 |
| 17233273 | Dcbl1        | discoidin, CUB and LCCL domain containing 1                                | 14.39544 | 15.37101 | 16.93657 | 17.36439 | 13.44297 | 17.1774  |
| 17326405 | Dcbl2        | discoidin, CUB and LCCL domain containing 2                                | 9.566956 | 8.516791 | 8.026828 | 8.516791 | 8.82747  | 8.516791 |
| 17339357 | Dlgap1       | discs, large (Drosophila) homolog-associated protein 1                     | 6.171709 | 5.013958 | 6.760172 | 6.096453 | 7.030854 | 6.129545 |
| 17499412 | Dlgap2       | discs, large (Drosophila) homolog-associated protein 2                     | 3.062691 | 3.362397 | 3.030425 | 3.18422  | 3.362397 | 3.291146 |
| 17418732 | Dlgap3       | discs, large (Drosophila) homolog-associated protein 3                     | 6.470871 | 6.852735 | 6.122114 | 6.235391 | 6.235391 | 5.524026 |
| 17305789 | Dlgap5       | discs, large (Drosophila) homolog-associated protein 5                     | 5.359803 | 6.145967 | 6.145967 | 6.145967 | 6.145967 | 7.180976 |
| 17324661 | Dlg1         | discs, large homolog 1 (Drosophila)                                        | 96.7232  | 99.76141 | 101.6538 | 103.2695 | 119.9243 | 111.4266 |
| 17480143 | Dlg2         | discs, large homolog 2 (Drosophila)                                        | 3.085427 | 3.143322 | 3.18219  | 3.279964 | 3.21302  | 3.18219  |
| 17536624 | Dlg3         | discs, large homolog 3 (Drosophila)                                        | 11.77292 | 13.5845  | 13.3933  | 14.28966 | 15.25775 | 16.05789 |
| 17251900 | Dlg4         | discs, large homolog 4 (Drosophila)                                        | 4.937224 | 5.392521 | 4.650417 | 5.390204 | 4.311172 | 5.427659 |
| 17304049 | Dlg5         | discs, large homolog 5 (Drosophila)                                        | 21.39497 | 22.20065 | 22.27386 | 22.20065 | 19.61438 | 22.2279  |
| 17378640 | Dlgap4       | discs, large homolog-associated protein 4 (Drosophila)                     | 16.08618 | 16.90467 | 16.45792 | 15.41796 | 16.45792 | 18.62954 |
| 17251875 | Dvl2         | dishevelled 2, dsh homolog (Drosophila)                                    | 9.351709 | 9.670028 | 9.320065 | 8.647481 | 8.339784 | 9.277782 |
| 17323909 | Dvl3         | dishevelled 3, dsh homolog (Drosophila)                                    | 85.04061 | 67.83745 | 66.97543 | 68.05598 | 61.45038 | 54.79415 |
| 17276153 | Daam1        | dishevelled associated activator of morphogenesis 1                        | 72.56641 | 67.49366 | 67.9212  | 68.24824 | 58.45927 | 63.63286 |
| 17345830 | Daam2        | dishevelled associated activator of morphogenesis 2                        | 4.842527 | 7.121741 | 5.499346 | 6.044529 | 7.046467 | 6.662252 |
| 17422745 | Dvl1         | dishevelled, dsh homolog 1 (Drosophila)                                    | 59.41355 | 56.87844 | 62.52841 | 55.6585  | 56.96998 | 57.08976 |
| 17305514 | LOC102634304 | disks large homolog 5                                                      | 5.519088 | 5.801959 | 5.93472  | 5.4399   | 6.985435 | 6.585486 |
| 17305456 | LOC102633225 | disks large homolog 5-like                                                 | 49.05098 | 55.62031 | 48.309   | 56.14984 | 37.12091 | 54.86408 |
| 17305266 | LOC102635554 | disks large homolog 5-like                                                 | 2.706428 | 2.953407 | 3.04259  | 2.953407 | 3.72877  | 3.688643 |
| 17299158 | LOC102636873 | disks large homolog 5-like                                                 | 3.260063 | 2.313986 | 2.933311 | 2.933311 | 2.846896 | 4.071612 |
| 17305321 | LOC102637484 | disks large homolog 5-like                                                 | 4.870264 | 5.346668 | 5.604866 | 7.090513 | 5.386395 | 6.499055 |
| 17305291 | LOC102639794 | disks large homolog 5-like                                                 | 13.03573 | 11.4633  | 11.99549 | 12.19257 | 11.91692 | 10.79177 |
| 17305508 | LOC102641378 | disks large homolog 5-like                                                 | 2.731475 | 3.229386 | 4.150744 | 2.955495 | 3.017618 | 3.729055 |
| 17305401 | LOC105245735 | disks large homolog 5-like                                                 | 5.021506 | 4.844138 | 5.238268 | 4.991696 | 5.083951 | 6.130055 |
| 17230638 | Disp1        | dispatched homolog 1 (Drosophila)                                          | 8.265488 | 7.332372 | 8.87631  | 10.68133 | 5.480889 | 7.348501 |
| 17374618 | Disp2        | dispatched homolog 2 (Drosophila)                                          | 6.547254 | 8.469754 | 14.3078  | 10.11833 | 7.163775 | 10.48228 |
| 17330080 | Dirc2        | disrupted in renal carcinoma 2 (human)                                     | 87.49993 | 87.95782 | 81.69467 | 88.07435 | 74.5445  | 77.96907 |
| 17506862 | Disc1        | disrupted in schizophrenia 1                                               | 9.800396 | 8.427531 | 10.11763 | 9.903716 | 9.961065 | 9.20527  |
| 17371777 | Dlx1         | distal-less homeobox 1                                                     | 4.824201 | 4.990692 | 6.085518 | 4.723971 | 4.34712  | 5.022515 |
| 17386426 | Dlx1as       | distal-less homeobox 1, antisense                                          | 4.801982 | 5.70608  | 4.723316 | 3.691277 | 4.256566 | 4.207753 |
| 17386433 | Dlx2         | distal-less homeobox 2                                                     | 11.04629 | 10.15705 | 8.467112 | 6.640169 | 8.467112 | 7.238496 |
| 17255352 | Dlx3         | distal-less homeobox 3                                                     | 6.559064 | 7.725402 | 7.122729 | 7.699795 | 7.456611 | 8.907743 |
| 17268169 | Dlx4         | distal-less homeobox 4                                                     | 4.72325  | 7.872981 | 4.577976 | 5.840776 | 5.258386 | 6.067491 |
| 17464706 | Dlx5         | distal-less homeobox 5                                                     | 3.159618 | 3.148621 | 2.926447 | 3.082947 | 3.168588 | 3.604402 |
| 17455936 | Dlx6         | distal-less homeobox 6                                                     | 8.197477 | 8.733379 | 6.889074 | 10.45753 | 8.596623 | 7.698994 |
| 17464698 | Dlx6os1      | distal-less homeobox 6, opposite strand 1                                  | 3.920751 | 4.048339 | 3.928695 | 3.966427 | 3.069067 | 3.520377 |
| 17464704 | Dlx6os2      | distal-less homeobox 6, opposite strand 2                                  | 4.600562 | 6.915914 | 4.946129 | 6.209814 | 6.890554 | 5.467154 |
| 17526881 | Dixdc1       | DIX domain containing 1                                                    | 6.306764 | 6.577503 | 7.419438 | 7.160349 | 8.029555 | 7.841502 |
| 17319248 | Dmc1         | DMC1 dosage suppressor of mck1 homolog, meiosis-specific homologous recomb | 4.91721  | 5.66321  | 5.081766 | 6.50584  | 6.057322 | 6.68295  |
| 17427939 | Dmrtb1       | DMRT-like family B with proline-rich C-terminal, 1                         | 7.36681  | 6.944544 | 6.958035 | 7.18018  | 6.944544 | 6.944544 |
| 17543753 | Dmrtc1a      | DMRT-like family C1a                                                       | 8.212264 | 6.923493 | 9.326204 | 8.405828 | 7.986647 | 5.160425 |
| 17536895 | Dmrtc1b      | DMRT-like family C1b                                                       | 2.563562 | 2.787941 | 2.737673 | 2.502691 | 3.069535 | 2.38831  |
| 17536933 | Dmrtc1c2     | DMRT-like family C1c2                                                      | 12.23888 | 14.674   | 12.78473 | 13.59289 | 11.17862 | 13.90884 |

|          |              |                                                                               |          |          |           |          |          |          |
|----------|--------------|-------------------------------------------------------------------------------|----------|----------|-----------|----------|----------|----------|
| 17543732 | Dmrtc1c2     | DMRT-like family C1c2                                                         | 12.23888 | 14.674   | 12.78473  | 13.59289 | 11.17862 | 13.90884 |
| 17536922 | Gm5166       | DMRT-like family pseudogene                                                   | 3.382805 | 3.470299 | 2.546455  | 3.502148 | 4.119788 | 3.372621 |
| 17350447 | Dmx1         | Dmx-like 1                                                                    | 64.07413 | 58.14366 | 49.81989  | 59.74972 | 61.93745 | 52.14185 |
| 17527210 | Dmx2         | Dmx-like 2                                                                    | 59.13376 | 55.83663 | 58.3965   | 71.77751 | 50.82795 | 58.51928 |
| 17234763 | Dnmt3l       | DNA (cytosine 5--)-methyltransferase 3-like                                   | 6.484476 | 6.110541 | 6.796632  | 6.439238 | 5.383521 | 6.296194 |
| 17276382 | Dbpht2       | DNA binding protein with his-thr domain                                       | 2.971415 | 3.095323 | 3.267167  | 2.940028 | 4.938079 | 4.775229 |
| 17365848 | Dclre1a      | DNA cross-link repair 1A, PSO2 homolog (S. cerevisiae)                        | 29.604   | 33.49027 | 36.64209  | 29.34433 | 31.7279  | 33.95071 |
| 17408684 | Dclre1b      | DNA cross-link repair 1B, PSO2 homolog (S. cerevisiae)                        | 16.99572 | 18.96977 | 13.50564  | 13.75696 | 16.16935 | 13.04342 |
| 17366399 | Dclre1c      | DNA cross-link repair 1C, PSO2 homolog (S. cerevisiae)                        | 18.96227 | 17.75668 | 18.8437   | 18.8437  | 17.1188  | 10.81994 |
| 17366425 | Dclre1c      | DNA cross-link repair 1C, PSO2 homolog (S. cerevisiae)                        | 2.924703 | 3.243901 | 3.243901  | 2.922919 | 3.208235 | 3.768029 |
| 17493358 | Ddias        | DNA damage-induced apoptosis suppressor                                       | 5.833089 | 5.779161 | 7.579328  | 6.762234 | 7.0198   | 9.15259  |
| 17421774 | Dffa         | DNA fragmentation factor, alpha subunit                                       | 28.27862 | 31.58855 | 31.39798  | 32.63663 | 22.98499 | 25.56893 |
| 17433543 | Dffb         | DNA fragmentation factor, beta subunit                                        | 6.042896 | 5.433644 | 5.433644  | 3.856788 | 6.404873 | 5.433644 |
| 17524535 | Dnmt1        | DNA methyltransferase (cytosine-5) 1                                          | 30.10477 | 35.2126  | 39.65498  | 32.31316 | 35.2126  | 31.62514 |
| 17428885 | Dmap1        | DNA methyltransferase 1-associated protein 1                                  | 10.48228 | 10.22529 | 10.73522  | 10.2311  | 12.05291 | 11.24366 |
| 17273652 | Dnmt3a       | DNA methyltransferase 3A                                                      | 37.29447 | 37.29447 | 33.77655  | 32.23777 | 37.29447 | 35.97842 |
| 17279759 | Dnmt3aos     | DNA methyltransferase 3A, opposite strand                                     | 4.036402 | 4.843702 | 4.555976  | 4.288877 | 3.827812 | 3.904804 |
| 17377963 | Dnmt3b       | DNA methyltransferase 3B                                                      | 8.607176 | 7.580589 | 7.837046  | 7.459661 | 7.153008 | 7.365482 |
| 17393092 | Dnmt3bos     | DNA methyltransferase 3B, opposite strand [Source:MGI Symbol;Acc:MGI:2685409] | 14.38527 | 13.39423 | 13.39423  | 14.20099 | 17.16526 | 13.39423 |
| 17447185 | Poln         | DNA polymerase N                                                              | 10.84035 | 8.388425 | 8.631612  | 9.500016 | 11.19715 | 9.697279 |
| 17238210 | Prim1        | DNA primase, p49 subunit                                                      | 6.857012 | 9.768452 | 11.42601  | 8.468521 | 7.516859 | 7.222358 |
| 17222001 | Prim2        | DNA primase, p58 subunit                                                      | 15.63752 | 14.67573 | 18.3321   | 15.84658 | 14.20168 | 15.39842 |
| 17233811 | Dna2         | DNA replication helicase 2 homolog (yeast)                                    | 18.68346 | 17.87548 | 18.2982   | 18.77642 | 20.2899  | 21.75176 |
| 17225888 | D1Ertdd622e  | DNA segment, Chr 1, ERATO Doi 622, expressed                                  | 27.44707 | 26.49613 | 24.62787  | 19.84578 | 25.75392 | 24.62787 |
| 17220600 | D1Pas1       | DNA segment, Chr 1, Pasteur Institute 1                                       | 4.563403 | 6.330283 | 4.160826  | 4.299891 | 7.324956 | 4.648419 |
| 17242416 | D10Jhu81e    | DNA segment, Chr 10, Johns Hopkins University 81 expressed                    | 107.9096 | 108.4616 | 93.58335  | 116.721  | 109.5207 | 118.8724 |
| 17235947 | D10Wsu102e   | DNA segment, Chr 10, Wayne State University 102, expressed                    | 28.27627 | 22.13396 | 20.41716  | 23.652   | 19.44369 | 27.17221 |
| 17257994 | D11Wsu47e    | DNA segment, Chr 11, Wayne State University 47, expressed                     | 8.27684  | 10.54714 | 10.07145  | 9.070047 | 15.86054 | 9.035034 |
| 17290190 | D13Ertdd608e | DNA segment, Chr 13, ERATO Doi 608, expressed                                 | 2.565109 | 2.180774 | 1.87309   | 2.423631 | 2.099928 | 2.305804 |
| 17311706 | D15Ertdd621e | DNA segment, Chr 15, ERATO Doi 621, expressed                                 | 130.0444 | 117.5117 | 99.87787  | 100.897  | 129.1461 | 120.7199 |
| 17331598 | D16Ertdd472e | DNA segment, Chr 16, ERATO Doi 472, expressed                                 | 37.07462 | 30.16283 | 25.87219  | 31.17354 | 28.04749 | 29.05874 |
| 17326588 | D16Ertdd519e | DNA segment, Chr 16, ERATO Doi 519, expressed                                 | 2.782767 | 2.886538 | 2.5922259 | 2.592259 | 3.107211 | 2.898125 |
| 17340784 | D17Ertdd648e | DNA segment, Chr 17, ERATO Doi 648, expressed                                 | 4.985299 | 3.957831 | 3.951335  | 4.037941 | 3.907592 | 4.071047 |
| 17336980 | D17H6S53E    | DNA segment, Chr 17, human D6S53E                                             | 15.4907  | 16.40246 | 16.89062  | 16.67668 | 15.36632 | 18.4806  |
| 17344140 | D17H6S56E-5  | DNA segment, Chr 17, human D6S56E 5                                           | 24.68992 | 26.05973 | 42.11902  | 19.92641 | 24.1197  | 24.57842 |
| 17342785 | D17Wsu92e    | DNA segment, Chr 17, Wayne State University 92, expressed                     | 254.3709 | 260.3755 | 273.6655  | 238.1786 | 233.7982 | 245.0173 |
| 17383571 | D2Wsu81e     | DNA segment, Chr 2, Wayne State University 81, expressed                      | 40.92357 | 30.67263 | 34.18354  | 28.9271  | 43.5986  | 40.08332 |
| 17396966 | D3Ertdd254e  | DNA segment, Chr 3, ERATO Doi 254, expressed                                  | 11.00578 | 11.64162 | 8.895835  | 12.0348  | 10.85073 | 11.64162 |
| 17397360 | D3Ertdd751e  | DNA segment, Chr 3, ERATO Doi 751, expressed                                  | 9.43518  | 9.372085 | 9.043868  | 10.04747 | 8.938793 | 10.72243 |
| 17417808 | D4Ertdd617e  | DNA segment, Chr 4, ERATO Doi 617, expressed                                  | 7.028759 | 6.622886 | 8.287     | 9.518868 | 6.88139  | 8.666083 |
| 17439319 | D5Ertdd577e  | DNA segment, Chr 5, ERATO Doi 577, expressed                                  | 2.084816 | 2.483681 | 2.903776  | 2.527148 | 2.297333 | 3.517231 |
| 17447487 | D5Ertdd579e  | DNA segment, Chr 5, ERATO Doi 579, expressed                                  | 23.24518 | 32.69436 | 28.96623  | 35.61739 | 33.06929 | 35.17674 |
| 17444851 | D5Ertdd605e  | DNA segment, Chr 5, ERATO Doi 605, expressed                                  | 5.896219 | 5.614159 | 6.97866   | 8.134987 | 4.743822 | 5.639315 |
| 17447900 | D5Ertdd615e  | DNA segment, Chr 5, ERATO Doi 615, expressed                                  | 5.995791 | 6.066902 | 6.679268  | 7.138545 | 7.661517 | 7.43545  |
| 17464175 | D6Ertdd474e  | DNA segment, Chr 6, ERATO Doi 474, expressed                                  | 4.202565 | 3.837775 | 3.804297  | 3.607001 | 3.882511 | 3.911549 |
| 17460533 | D6Ertdd527e  | DNA segment, Chr 6, ERATO Doi 527, expressed                                  | 5.656972 | 6.086277 | 6.45054   | 5.928799 | 6.362969 | 6.297503 |
| 17463316 | D6Wsu163e    | DNA segment, Chr 6, Wayne State University 163, expressed                     | 33.09864 | 29.17134 | 26.52921  | 33.65689 | 26.81633 | 30.49984 |
| 17473113 | D7Ertdd143e  | DNA segment, Chr 7, ERATO Doi 143, expressed                                  | 12.12691 | 12.00156 | 13.94427  | 11.11126 | 10.4306  | 11.83871 |
| 17497283 | D7Ertdd443e  | DNA segment, Chr 7, ERATO Doi 443, expressed                                  | 5.402136 | 4.704104 | 5.029308  | 4.668729 | 5.156242 | 4.723218 |
| 17511096 | D8Ertdd738e  | DNA segment, Chr 8, ERATO Doi 738, expressed                                  | 111.2499 | 99.05171 | 112.4944  | 115.7951 | 136.012  | 123.6047 |
| 17500595 | D8Ertdd82e   | DNA segment, Chr 8, ERATO Doi 82, expressed                                   | 11.15718 | 10.03466 | 10.00355  | 11.24771 | 13.41161 | 9.310251 |
| 17542292 | DXBay18      | DNA segment, Chr X, Baylor 18                                                 | 10.89519 | 10.48228 | 10.52757  | 10.80585 | 10.28436 | 12.87839 |
| 17318143 | Top1mt       | DNA topoisomerase 1, mitochondrial                                            | 22.69559 | 31.24796 | 32.7463   | 29.39849 | 22.73054 | 27.77105 |
| 17432287 | Ddi2         | DNA-damage inducible protein 2                                                | 210.6129 | 244.8747 | 224.6943  | 225.451  | 204.2638 | 227.323  |
| 17237978 | Ddit3        | DNA-damage inducible transcript 3                                             | 35.11949 | 24.25281 | 26.30819  | 23.16701 | 23.8213  | 23.28776 |
| 17243868 | Dram1        | DNA-damage regulated autophagy modulator 1                                    | 10.05625 | 9.65556  | 10.76122  | 8.231412 | 9.732834 | 9.732834 |
| 17401500 | Dram2        | DNA-damage regulated autophagy modulator 2                                    | 168.3827 | 201.6738 | 179.9834  | 185.9138 | 180.3793 | 169.5468 |
| 17241032 | Ddit4        | DNA-damage inducible transcript 4                                             | 21.49471 | 26.7043  | 22.70708  | 19.96056 | 30.47554 | 38.72518 |
| 17402996 | Ddit4l       | DNA-damage-inducible transcript 4-like                                        | 8.751134 | 7.009541 | 6.022782  | 7.13711  | 6.707848 | 8.454386 |
| 17412774 | Dnaja1       | DnaJ (Hsp40) homolog, subfamily A, member 1                                   | 49.16296 | 51.13716 | 44.4481   | 45.49102 | 37.29447 | 41.34211 |
| 17511366 | Dnaja2       | DnaJ (Hsp40) homolog, subfamily A, member 2                                   | 232.3603 | 214.5084 | 198.2188  | 226.5334 | 189.9519 | 204.3318 |
| 17322541 | Dnaja3       | DnaJ (Hsp40) homolog, subfamily A, member 3                                   | 7.011776 | 7.929226 | 6.893898  | 8.106392 | 8.258845 | 8.842412 |
| 17322543 | Dnaja3       | DnaJ (Hsp40) homolog, subfamily A, member 3                                   | 6.96397  | 6.970296 | 5.954127  | 5.697899 | 6.906764 | 7.488724 |
| 17322545 | Dnaja3       | DnaJ (Hsp40) homolog, subfamily A, member 3                                   | 171.5886 | 183.5615 | 172.2894  | 193.7322 | 197.4878 | 175.3654 |
| 17517404 | Dnaja4       | DnaJ (Hsp40) homolog, subfamily A, member 4                                   | 11.7859  | 11.7859  | 12.52588  | 10.66491 | 11.7859  | 11.7859  |
| 17502954 | Dnaja1b      | DnaJ (Hsp40) homolog, subfamily B, member 1                                   | 38.27631 | 25.18914 | 21.77484  | 20.49784 | 20.12811 | 20.97632 |
| 17324305 | Dnaja1b11    | DnaJ (Hsp40) homolog, subfamily B, member 11                                  | 173.8646 | 82.99601 | 84.19835  | 92.69245 | 114.6577 | 79.6946  |
| 17233586 | Dnaja1b12    | DnaJ (Hsp40) homolog, subfamily B, member 12                                  | 161.4261 | 144.7671 | 159.8517  | 145.2778 | 153.6112 | 144.98   |
| 17403013 | Dnaja1b14    | DnaJ (Hsp40) homolog, subfamily B, member 14                                  | 28.45756 | 27.16355 | 32.12178  | 27.16355 | 22.84205 | 26.14748 |
| 17214462 | Dnaja2b      | DnaJ (Hsp40) homolog, subfamily B, member 2                                   | 33.27784 | 29.52858 | 29.27404  | 29.27404 | 27.96053 | 30.06973 |
| 17225325 | Dnaja3b      | DnaJ (Hsp40) homolog, subfamily B, member 3                                   | 3.062691 | 4.563023 | 2.777698  | 3.918958 | 2.873343 | 2.559213 |
| 17411188 | Dnaja4b      | DnaJ (Hsp40) homolog, subfamily B, member 4                                   | 18.68424 | 14.13284 | 12.90332  | 12.05834 | 12.95682 | 12.67874 |
| 17413191 | Dnaja5b      | DnaJ (Hsp40) homolog, subfamily B, member 5                                   | 13.15993 | 13.51706 | 16.6515   | 14.55709 | 13.57039 | 15.25986 |
| 17435702 | Dnaja6b      | DnaJ (Hsp40) homolog, subfamily B, member 6                                   | 18.63832 | 18.04754 | 18.49649  | 20.98592 | 19.09827 | 19.6514  |
| 17319484 | Dnaja7b      | DnaJ (Hsp40) homolog, subfamily B, member 7                                   | 4.777911 | 3.043202 | 3.53983   | 3.627134 | 3.206257 | 3.399188 |
| 17460643 | Dnaja8b      | DnaJ (Hsp40) homolog, subfamily B, member 8                                   | 6.418784 | 9.187103 | 8.871389  | 8.022156 | 8.022156 | 8.562428 |
| 17280893 | Dnaja9b      | DnaJ (Hsp40) homolog, subfamily B, member 9                                   | 488.0212 | 192.6315 | 198.6452  | 183.5488 | 211.8369 | 132.7152 |
| 17539107 | Gm6568       | DnaJ (Hsp40) homolog, subfamily B, member 9 pseudogene                        | 6.393208 | 5.089663 | 5.327394  | 5.593999 | 6.766032 | 3.999002 |
| 17382013 | Dnaja1c      | DnaJ (Hsp40) homolog, subfamily C, member 1                                   | 32.49081 | 27.12216 | 29.99604  | 31.19775 | 30.90482 | 33.36862 |
| 17372392 | Dnaja1c10    | DnaJ (Hsp40) homolog, subfamily C, member 10                                  | 81.07302 | 57.76085 | 57.95966  | 48.05351 | 56.9842  | 48.51436 |
| 17422015 | Dnaja1c11    | DnaJ (Hsp40) homolog, subfamily C, member 11                                  | 73.14767 | 66.53216 | 72.49452  | 79.47284 | 71.95934 | 64.53366 |
| 17233920 | Dnaja1c12    | DnaJ (Hsp40) homolog, subfamily C, member 12                                  | 66.26155 | 41.81533 | 48.62782  | 38.31188 | 58.15092 | 41.98232 |
| 17530348 | Dnaja1c13    | DnaJ (Hsp40) homolog, subfamily C, member 13                                  | 67.53671 | 76.68434 | 71.4811   | 74.29432 | 71.25404 | 74.42317 |
| 17238571 | Dnaja1c14    | DnaJ (Hsp40) homolog, subfamily C, member 14                                  | 53.82782 | 53.56096 | 53.82782  | 53.82782 | 46.2256  | 49.20797 |





|          |          |                                                                                |          |          |          |          |          |          |
|----------|----------|--------------------------------------------------------------------------------|----------|----------|----------|----------|----------|----------|
| 17332923 | Dynlt1c  | dynein light chain Tctex-type 1C                                               | 57.31497 | 57.94049 | 58.02771 | 58.02771 | 51.49141 | 62.11544 |
| 17340599 | Dynlt1f  | dynein light chain Tctex-type 1F                                               | 7.628345 | 5.616105 | 9.1684   | 7.101038 | 8.271793 | 7.628345 |
| 17540178 | Dynlt3   | dynein light chain Tctex-type 3                                                | 77.5046  | 68.49943 | 64.79542 | 57.48167 | 53.79126 | 62.62297 |
| 17435786 | Drc1     | dynein regulatory complex subunit 1                                            | 9.87965  | 9.87965  | 9.87965  | 9.768452 | 10.85795 | 11.34732 |
| 17504222 | Drc7     | dynein regulatory complex subunit 7                                            | 9.361307 | 8.626109 | 11.65115 | 8.69406  | 7.224812 | 11.69168 |
| 17506112 | Dnaaf1   | dynein, axonemal assembly factor 1                                             | 10.3876  | 8.449055 | 8.076387 | 7.614768 | 7.601373 | 11.16832 |
| 17281497 | Dnaaf2   | dynein, axonemal assembly factor 2                                             | 15.7187  | 15.59736 | 16.60574 | 17.32952 | 17.42178 | 19.17002 |
| 17485801 | Dnaaf3   | dynein, axonemal assembly factor 3                                             | 6.026415 | 4.641046 | 4.334603 | 4.757224 | 3.906942 | 4.453038 |
| 17443924 | Dnaaf5   | dynein, axonemal, assembly factor 5                                            | 55.71369 | 43.51859 | 40.42792 | 40.77774 | 35.67669 | 31.75606 |
| 17304658 | Dnah1    | dynein, axonemal, heavy chain 1                                                | 5.483435 | 5.737968 | 6.18267  | 5.811417 | 5.160211 | 6.685845 |
| 17442609 | Dnah10   | dynein, axonemal, heavy chain 10                                               | 4.713471 | 6.306677 | 5.837295 | 5.098525 | 5.168946 | 4.573029 |
| 17284710 | Dnah11   | dynein, axonemal, heavy chain 11                                               | 4.747342 | 4.647678 | 4.647678 | 5.165292 | 4.596099 | 4.755675 |
| 17297923 | Dnah12   | dynein, axonemal, heavy chain 12                                               | 3.943127 | 4.430962 | 4.430962 | 4.430962 | 4.430962 | 4.263269 |
| 17220277 | Dnah14   | dynein, axonemal, heavy chain 14                                               | 3.831077 | 3.785674 | 3.541744 | 3.831077 | 3.831077 | 4.71589  |
| 17272626 | Dnah17   | dynein, axonemal, heavy chain 17                                               | 3.729055 | 3.729055 | 3.729055 | 3.729055 | 3.5136   | 4.113909 |
| 17264676 | Dnah2    | dynein, axonemal, heavy chain 2                                                | 4.785966 | 4.08252  | 3.634231 | 4.280472 | 4.08252  | 4.110033 |
| 17251656 | Dnah2os  | dynein, axonemal, heavy chain 2, opposite strand [Source:MGI Symbol;Acc:MGI:19 | 6.317352 | 7.333999 | 6.060219 | 6.802146 | 6.555701 | 6.785617 |
| 17495702 | Dnah3    | dynein, axonemal, heavy chain 3                                                | 3.840595 | 3.745167 | 3.840595 | 3.804957 | 3.729727 | 4.335325 |
| 17310688 | Dnah5    | dynein, axonemal, heavy chain 5                                                | 4.294827 | 4.294827 | 4.489859 | 4.294827 | 4.493906 | 4.294827 |
| 17467840 | Dnah6    | dynein, axonemal, heavy chain 6                                                | 3.668677 | 3.668677 | 3.668677 | 3.668677 | 3.560599 | 3.668677 |
| 17223002 | Dnah7a   | dynein, axonemal, heavy chain 7A                                               | 2.717594 | 3.350183 | 2.859811 | 2.409694 | 5.384342 | 2.353275 |
| 17212548 | Dnah7b   | dynein, axonemal, heavy chain 7B                                               | 3.287247 | 3.132186 | 2.85304  | 3.213889 | 3.843871 | 3.313004 |
| 17212619 | Dnah7c   | dynein, axonemal, heavy chain 7C                                               | 2.772197 | 2.279046 | 2.67402  | 2.810779 | 2.999205 | 1.82959  |
| 17335628 | Dnah8    | dynein, axonemal, heavy chain 8                                                | 4.01461  | 4.01461  | 3.941651 | 4.20927  | 3.784572 | 4.132486 |
| 17264208 | Dnah9    | dynein, axonemal, heavy chain 9                                                | 5.421906 | 5.871829 | 5.48933  | 6.086994 | 5.364672 | 5.393119 |
| 17412883 | Dnaic1   | dynein, axonemal, intermediate chain 1                                         | 10.41665 | 10.41665 | 11.3879  | 10.41665 | 11.44448 | 10.41665 |
| 17258041 | Dnaic2   | dynein, axonemal, intermediate chain 2                                         | 4.81872  | 5.239394 | 4.63224  | 5.595783 | 5.433267 | 5.010623 |
| 17277177 | Dnal1    | dynein, axonemal, light chain 1                                                | 4.391367 | 4.746717 | 4.650062 | 3.750544 | 3.913203 | 3.832246 |
| 17319324 | Dnal4    | dynein, axonemal, light chain 4                                                | 5.857886 | 4.906962 | 5.830825 | 5.386134 | 5.119774 | 5.386134 |
| 17429921 | Dnal1i   | dynein, axonemal, light intermediate polypeptide 1                             | 10.48976 | 11.40923 | 10.52188 | 12.8301  | 10.20815 | 10.40922 |
| 17512229 | Dync1li2 | dynein, cytoplasmic 1 light intermediate chain 2                               | 28.71554 | 32.21231 | 35.99713 | 36.56446 | 34.09764 | 29.80598 |
| 17513965 | Dbndd1   | dysbindin (dystrobrevin binding protein 1) domain containing 1                 | 15.86615 | 19.09046 | 16.975   | 16.51094 | 19.30349 | 20.4306  |
| 17379427 | Dbndd2   | dysbindin (dystrobrevin binding protein 1) domain containing 2                 | 7.29137  | 7.744703 | 7.219455 | 6.698927 | 8.078234 | 7.07446  |
| 17460185 | Dysf     | dysferlin                                                                      | 14.22572 | 13.9262  | 20.89245 | 13.36261 | 13.64528 | 13.9262  |
| 17535930 | Dkc1     | dykeratosis congenita 1, dyskerin                                              | 28.83242 | 24.05275 | 26.16507 | 22.9869  | 22.61095 | 23.39324 |
| 17519245 | Dyx1c1   | dyslexia susceptibility 1 candidate 1 homolog (human)                          | 4.040293 | 4.527172 | 4.236198 | 4.236198 | 3.977054 | 4.024892 |
| 17211587 | Dst      | dystonin                                                                       | 32.19579 | 34.68548 | 42.08167 | 37.38973 | 39.4904  | 36.13913 |
| 17348899 | Dtna     | dystrobrevin alpha                                                             | 5.386134 | 5.579593 | 5.386134 | 5.386134 | 5.263272 | 5.386134 |
| 17348902 | Dtna     | dystrobrevin alpha                                                             | 7.759749 | 6.190989 | 7.618358 | 7.618358 | 6.589594 | 7.566783 |
| 17292157 | Dtnbp1   | dystrobrevin binding protein 1                                                 | 65.3004  | 60.77306 | 56.42764 | 57.16103 | 63.9561  | 65.3004  |
| 17273620 | Dtnb     | dystrobrevin, beta                                                             | 46.65986 | 46.54002 | 52.41544 | 32.19869 | 47.69447 | 39.17768 |
| 17279755 | Dtnbos   | dystrobrevin, beta, opposite strand [Source:MGI Symbol;Acc:MGI:5141913]        | 2.782767 | 2.651502 | 3.143496 | 2.782767 | 2.782767 | 2.737104 |
| 17531168 | Dag1     | dystroglycan 1                                                                 | 144.0844 | 134.7088 | 140.1531 | 129.3028 | 100.8201 | 116.653  |
| 17474444 | Dmwd     | dystrophia myotonica-containing WD repeat motif                                | 15.12748 | 17.36523 | 21.1706  | 17.36523 | 20.68338 | 17.69684 |
| 17474454 | Dmpk     | dystrophia myotonica-protein kinase                                            | 25.3661  | 56.67223 | 57.73043 | 41.99018 | 32.33019 | 50.91151 |
| 17537677 | Drp2     | dystrophin related protein 2                                                   | 3.936109 | 5.192646 | 4.280265 | 4.435725 | 4.527831 | 4.290542 |
| 17536078 | Dmd      | dystrophin, muscular dystrophy                                                 | 7.169189 | 7.169189 | 7.169189 | 7.169189 | 8.012209 | 7.169189 |
| 17223730 | Dytn     | dystrotelin                                                                    | 5.365416 | 6.049266 | 4.683932 | 4.274957 | 5.395251 | 6.246249 |
| 17313284 | Ep300    | E1A binding protein p300                                                       | 62.67204 | 71.82429 | 73.93215 | 65.55255 | 64.7236  | 67.42632 |
| 17451061 | Ep400    | E1A binding protein p400                                                       | 54.02293 | 52.85544 | 60.13321 | 50.4842  | 53.77449 | 52.83346 |
| 17451126 | Ep400    | E1A binding protein p400                                                       | 146.3694 | 131.1006 | 139.4206 | 144.4363 | 191.0213 | 165.6047 |
| 17515819 | Ets1     | E26 avian leukemia oncogene 1, 5 domain                                        | 27.93671 | 28.88663 | 34.36124 | 26.6673  | 22.36127 | 19.00082 |
| 17327465 | Ets2     | E26 avian leukemia oncogene 2, 3 domain                                        | 52.96656 | 71.20467 | 74.25107 | 53.773   | 59.77954 | 39.97455 |
| 17393160 | E2f1     | E2F transcription factor 1                                                     | 14.85545 | 13.32765 | 14.83466 | 13.53572 | 13.8837  | 14.63235 |
| 17420024 | E2f2     | E2F transcription factor 2                                                     | 17.21388 | 10.25333 | 12.16437 | 11.44678 | 9.891093 | 14.79471 |
| 17291559 | E2f3     | E2F transcription factor 3                                                     | 18.22403 | 14.45243 | 13.49104 | 13.56183 | 10.64556 | 10.04259 |
| 17504715 | E2f4     | E2F transcription factor 4                                                     | 39.5123  | 34.78878 | 44.67017 | 30.01892 | 35.89448 | 29.32441 |
| 17396132 | E2f5     | E2F transcription factor 5                                                     | 19.76451 | 16.09053 | 19.05028 | 14.67379 | 23.45608 | 18.96109 |
| 17274202 | E2f6     | E2F transcription factor 6                                                     | 27.04388 | 24.69608 | 25.56114 | 24.69608 | 24.23466 | 26.61615 |
| 17237186 | E2f7     | E2F transcription factor 7                                                     | 7.592105 | 8.636459 | 7.126185 | 7.442411 | 6.437542 | 6.461638 |
| 17491378 | E2f8     | E2F transcription factor 8                                                     | 16.97995 | 23.24937 | 29.79503 | 12.58445 | 14.75876 | 11.24366 |
| 17281108 | Eapp     | E2F-associated phosphoprotein                                                  | 32.80332 | 36.45336 | 32.80741 | 32.19088 | 25.47323 | 28.95138 |
| 17341856 | E4f1     | E4F transcription factor 1                                                     | 16.15009 | 13.9823  | 18.05667 | 14.19037 | 16.78278 | 20.36782 |
| 17302238 | Elf1     | E74-like factor 1                                                              | 71.25849 | 82.93907 | 83.42801 | 76.49746 | 69.28495 | 70.72018 |
| 17405099 | Elf2     | E74-like factor 2                                                              | 35.76434 | 43.32086 | 40.4509  | 34.28724 | 37.32344 | 37.7936  |
| 17227266 | Elf3     | E74-like factor 3                                                              | 4.194678 | 4.072797 | 4.167436 | 2.908348 | 3.179743 | 3.703322 |
| 17541404 | Elf4     | E74-like factor 4 (ets domain transcription factor)                            | 13.54755 | 13.83528 | 13.72363 | 13.19949 | 10.90532 | 14.64443 |
| 17373739 | Elf5     | E74-like factor 5                                                              | 4.376234 | 4.34185  | 3.995372 | 4.319337 | 4.857217 | 4.577373 |
| 17248691 | Ebf1     | early B cell factor 1                                                          | 4.543865 | 3.946161 | 4.567865 | 3.975207 | 3.940367 | 4.196772 |
| 17301536 | Ebf2     | early B cell factor 2                                                          | 4.873134 | 4.587601 | 4.391671 | 4.07938  | 4.622361 | 3.68532  |
| 17497366 | Ebf3     | early B cell factor 3                                                          | 12.79537 | 11.50086 | 12.36843 | 11.32202 | 13.79296 | 12.33033 |
| 17376278 | Ebf4     | early B cell factor 4                                                          | 8.922698 | 10.73128 | 9.556948 | 10.62934 | 10.01389 | 9.361307 |
| 17236754 | Eea1     | early endosome antigen 1                                                       | 56.73039 | 57.97825 | 49.80228 | 50.93304 | 60.03492 | 55.39485 |
| 17349514 | Egr1     | early growth response 1                                                        | 21.79991 | 28.55319 | 50.35664 | 26.38745 | 53.68771 | 34.79698 |
| 17233993 | Egr2     | early growth response 2                                                        | 8.322114 | 6.368131 | 7.916595 | 8.620072 | 7.145475 | 7.990246 |
| 17301718 | Egr3     | early growth response 3                                                        | 6.998715 | 8.094096 | 6.992896 | 7.440399 | 6.992896 | 7.786851 |
| 17468405 | Egr4     | early growth response 4                                                        | 6.343196 | 8.986753 | 7.324448 | 7.511026 | 9.554829 | 8.71258  |
| 17417791 | Ebna1bp2 | EBNA1 binding protein 2                                                        | 24.26912 | 28.15931 | 24.08094 | 27.32084 | 34.00088 | 27.71279 |
| 17303738 | Ecd      | ecdysoneless homolog (Drosophila)                                              | 65.82255 | 54.361   | 56.29754 | 54.89832 | 42.94386 | 46.43015 |
| 17278561 | Eml1     | echinoderm microtubule associated protein like 1                               | 7.584373 | 9.488237 | 11.28465 | 9.488237 | 7.871508 | 8.581501 |
| 17474497 | Eml2     | echinoderm microtubule associated protein like 2                               | 14.70342 | 17.45091 | 20.44208 | 17.61741 | 16.64261 | 22.65786 |
| 17357314 | Eml3     | echinoderm microtubule associated protein like 3                               | 43.55481 | 31.52447 | 37.35657 | 33.96978 | 30.96786 | 36.7999  |
| 17339991 | Eml4     | echinoderm microtubule associated protein like 4                               | 35.06379 | 36.35924 | 35.69104 | 29.00842 | 34.49439 | 35.55474 |
| 17283155 | Eml5     | echinoderm microtubule associated protein like 5                               | 13.43691 | 15.53026 | 12.94605 | 14.02569 | 12.24627 | 13.83029 |



|          |              |                                                                                |          |          |          |          |          |          |
|----------|--------------|--------------------------------------------------------------------------------|----------|----------|----------|----------|----------|----------|
| 17540535 | Elk1         | ELK1, member of ETS oncogene family                                            | 15.29258 | 19.43803 | 18.90663 | 20.05931 | 18.55621 | 16.40143 |
| 17244341 | Elk3         | ELK3, member of ETS oncogene family                                            | 20.35258 | 21.98732 | 37.40243 | 22.7381  | 18.63419 | 16.70734 |
| 17217145 | Elk4         | ELK4, member of ETS oncogene family                                            | 25.24245 | 38.69432 | 43.28424 | 38.58023 | 43.71359 | 43.16889 |
| 17470323 | Erc1         | ELKS/RAB6-interacting/CAST family member 1                                     | 53.72717 | 51.47464 | 54.38738 | 52.47761 | 39.54984 | 47.88162 |
| 17298090 | Erc2         | ELKS/RAB6-interacting/CAST family member 2                                     | 4.975564 | 5.074761 | 3.85254  | 4.193108 | 4.424824 | 4.571286 |
| 17298451 | Eaf1         | ELL associated factor 1                                                        | 75.35389 | 78.95616 | 76.14936 | 71.85218 | 71.27726 | 65.59391 |
| 17330246 | Eaf2         | ELL associated factor 2                                                        | 3.339703 | 3.339703 | 3.370073 | 3.339703 | 3.339703 | 3.339703 |
| 17447560 | Evc          | Ellis van Creveld gene syndrome                                                | 15.074   | 16.27324 | 15.97761 | 16.27324 | 15.24696 | 16.38893 |
| 17437019 | Evc2         | Ellis van Creveld syndrome 2                                                   | 11.16267 | 11.51594 | 12.0744  | 11.34363 | 12.29466 | 11.72885 |
| 17282465 | Elmsan1      | ELM2 and Myb/SANT-like domain containing 1                                     | 13.524   | 14.51206 | 14.79307 | 14.79307 | 17.40597 | 15.35514 |
| 17527173 | Elmod1       | ELMO/CED-12 domain containing 1                                                | 4.432682 | 5.789987 | 4.773045 | 4.801649 | 5.55351  | 4.711283 |
| 17510885 | Elmod2       | ELMO/CED-12 domain containing 2                                                | 32.76106 | 27.08496 | 30.89454 | 30.89454 | 34.37291 | 34.21151 |
| 17467782 | Elmod3       | ELMO/CED-12 domain containing 3                                                | 52.09886 | 47.90054 | 69.12281 | 55.41329 | 41.5429  | 40.74017 |
| 17524925 | Elof1        | elongation factor 1 homolog (ELF1, <i>S. cerevisiae</i> )                      | 17.08905 | 20.4391  | 19.62458 | 18.14789 | 18.30531 | 14.47298 |
| 17532692 | LOC100861738 | elongation factor 2 pseudogene                                                 | 5.298192 | 7.027931 | 7.684546 | 9.10892  | 6.992896 | 6.158761 |
| 17501962 | Eli          | elongation factor RNA polymerase II                                            | 38.67046 | 43.77302 | 50.60402 | 36.34059 | 50.87377 | 40.29028 |
| 17288699 | Eli2         | elongation factor RNA polymerase II 2                                          | 126.4339 | 130.2275 | 101.9558 | 131.3443 | 151.0131 | 149.6927 |
| 17390580 | Eli3         | elongation factor RNA polymerase II-like 3                                     | 5.205367 | 7.337456 | 7.264231 | 8.172968 | 7.331051 | 6.957891 |
| 17479804 | Eftud1       | elongation factor Tu GTP binding domain containing 1                           | 27.8196  | 27.18257 | 25.41679 | 24.34291 | 17.49014 | 21.76865 |
| 17270322 | Eftud2       | elongation factor Tu GTP binding domain containing 2                           | 35.10489 | 36.49533 | 37.93164 | 36.10934 | 33.56812 | 30.89454 |
| 17417767 | Elov1        | elongation of very long chain fatty acids (FEN1/Elo2, SUR4/Elo3, yeast)-like 1 | 47.46657 | 64.07635 | 58.211   | 57.16103 | 46.51261 | 45.28841 |
| 17292058 | Elov2        | elongation of very long chain fatty acids (FEN1/Elo2, SUR4/Elo3, yeast)-like 2 | 1028.895 | 1010.582 | 1003.657 | 851.6401 | 734.8113 | 789.3493 |
| 17359918 | Elov3        | elongation of very long chain fatty acids (FEN1/Elo2, SUR4/Elo3, yeast)-like 3 | 1695.271 | 186.8362 | 36.64819 | 481.2324 | 264.5378 | 143.3512 |
| 17529307 | Elov4        | elongation of very long chain fatty acids (FEN1/Elo2, SUR4/Elo3, yeast)-like 4 | 3.775637 | 4.754158 | 4.855601 | 4.801649 | 5.982423 | 4.822529 |
| 17389051 | Elp4         | elongation protein 4 homolog ( <i>S. cerevisiae</i> )                          | 37.94663 | 31.62777 | 29.36712 | 31.77169 | 34.6588  | 38.72545 |
| 17348990 | Elp2         | elongator acetyltransferase complex subunit 2                                  | 48.2946  | 38.08682 | 42.8214  | 50.60261 | 46.79687 | 45.50048 |
| 17307755 | Elp3         | elongator acetyltransferase complex subunit 3                                  | 57.79449 | 43.61855 | 43.94204 | 49.30356 | 56.02776 | 51.46965 |
| 17265111 | Elp5         | elongator acetyltransferase complex subunit 5                                  | 36.63422 | 26.88296 | 28.29451 | 24.62787 | 28.38762 | 30.61231 |
| 17522328 | Elp6         | elongator acetyltransferase complex subunit 6                                  | 8.325287 | 10.6116  | 10.39682 | 7.783235 | 9.077217 | 9.296773 |
| 17519598 | Elov5        | ELOVL family member 5, elongation of long chain fatty acids (yeast)            | 1279.106 | 1437.006 | 1415.19  | 1226.856 | 1304.797 | 1360.725 |
| 17402558 | Elov6        | ELOVL family member 6, elongation of long chain fatty acids (yeast)            | 169.3918 | 195.2015 | 258.3369 | 156.6999 | 121.6051 | 127.7846 |
| 17289717 | Elov7        | ELOVL family member 7, elongation of long chain fatty acids (yeast)            | 6.25873  | 6.437632 | 6.762797 | 6.79748  | 5.211685 | 6.655514 |
| 17290083 | Emb          | embigin                                                                        | 3.328841 | 5.094427 | 4.656997 | 4.20927  | 4.70003  | 4.880605 |
| 17306524 | Efs          | embryonal Fyn-associated substrate                                             | 5.460337 | 5.306866 | 5.961684 | 5.386134 | 4.465588 | 6.584619 |
| 17493250 | Eed          | embryonic ectoderm development                                                 | 47.70372 | 41.49168 | 36.19654 | 38.93188 | 40.93747 | 47.79375 |
| 17534741 | Etd          | embryonic testis differentiation                                               | 3.245903 | 2.549651 | 2.411549 | 2.324419 | 2.477886 | 2.631071 |
| 17535752 | Emd          | emerin                                                                         | 17.11679 | 16.38871 | 14.67379 | 15.49606 | 22.06549 | 14.3749  |
| 17470779 | Emg1         | EMG1 nucleolar protein homolog ( <i>S. cerevisiae</i> )                        | 47.29448 | 36.62026 | 42.74637 | 48.70676 | 40.84422 | 45.96201 |
| 17260119 | Emid1        | EMI domain containing 1                                                        | 9.791433 | 9.792655 | 8.518326 | 11.76101 | 9.733576 | 10.01396 |
| 17307463 | Ebpl         | emopamil binding protein-like                                                  | 72.00923 | 84.92162 | 73.23239 | 75.11869 | 85.87522 | 79.86436 |
| 17460261 | Emx1         | empty spiracles homeobox 1                                                     | 8.292459 | 7.577122 | 8.039245 | 8.119495 | 9.037289 | 9.659711 |
| 17360845 | Emx2         | empty spiracles homeobox 2                                                     | 4.01461  | 4.176082 | 4.604294 | 4.184224 | 4.037298 | 4.20927  |
| 17493583 | Emys         | EMSY, BRCA2-interacting transcriptional repressor                              | 34.50324 | 41.49254 | 40.65977 | 38.31109 | 31.66572 | 37.11267 |
| 17366047 | Emx2os       | Emx2 opposite strand/antisense transcript (non-protein coding)                 | 3.81145  | 3.503945 | 3.640105 | 4.412725 | 3.263862 | 3.400342 |
| 17230573 | Enah         | enabled homolog ( <i>Drosophila</i> )                                          | 4.078391 | 4.048956 | 3.658875 | 4.269301 | 3.603828 | 4.919256 |
| 17438772 | Enam         | enamelin                                                                       | 3.897422 | 3.138228 | 3.026059 | 3.002054 | 2.988145 | 3.007574 |
| 17278593 | Evl          | Ena-vasodilator stimulated phosphoprotein                                      | 30.56122 | 31.58505 | 36.30333 | 32.62735 | 30.62653 | 33.7328  |
| 17523095 | Exog         | endo/exonuclease (5-3), endonuclease G-like                                    | 5.94728  | 4.544558 | 5.692491 | 6.040048 | 5.970493 | 4.400294 |
| 17258912 | Engase       | endo-beta-N-acetylglucosaminidase                                              | 26.0083  | 32.71975 | 33.57743 | 28.9259  | 37.18168 | 29.61795 |
| 17391915 | Erv3         | endogenous retroviral sequence 3                                               | 4.982915 | 5.419313 | 6.631292 | 4.982915 | 4.982915 | 5.56106  |
| 17369925 | Eng          | endoglin                                                                       | 168.5392 | 150.3801 | 175.5417 | 144.984  | 75.39046 | 87.76112 |
| 17402981 | Emcn         | endomucin                                                                      | 15.82485 | 13.77003 | 15.23914 | 12.63068 | 12.77782 | 12.88446 |
| 17524014 | Endod1       | endonuclease domain containing 1                                               | 15.81049 | 16.91686 | 15.44813 | 14.69283 | 17.25712 | 17.58801 |
| 17369120 | Endog        | endonuclease G                                                                 | 45.43493 | 35.15846 | 29.31485 | 42.45728 | 46.26085 | 33.77023 |
| 17259157 | Endov        | endonuclease V                                                                 | 13.09823 | 12.2033  | 13.14161 | 13.81209 | 11.99042 | 11.51953 |
| 17320993 | Endou        | endonuclease, polyU-specific                                                   | 4.229127 | 4.433727 | 3.230013 | 4.411563 | 3.665729 | 3.7356   |
| 17515539 | Eepd1        | endonuclease/exonuclease/phosphatase family domain containing 1                | 32.52484 | 32.52484 | 38.64366 | 32.52484 | 29.27648 | 30.21221 |
| 17270888 | Ern1         | endoplasmic reticulum (ER) to nucleus signalling 1                             | 122.3118 | 116.5633 | 111.4096 | 116.2221 | 105.8641 | 88.13908 |
| 17495958 | Ern2         | endoplasmic reticulum (ER) to nucleus signalling 2                             | 5.070858 | 5.317765 | 5.317765 | 5.317765 | 5.317765 | 5.38998  |
| 17288654 | Erap1        | endoplasmic reticulum aminopeptidase 1                                         | 160.4333 | 136.5381 | 122.882  | 136.1761 | 137.053  | 143.5779 |
| 17353585 | Sil1         | endoplasmic reticulum chaperone SIL1 homolog ( <i>S. cerevisiae</i> )          | 162.8466 | 150.5052 | 135.9583 | 132.1397 | 182.8111 | 150.7611 |
| 17261399 | Erlec1       | endoplasmic reticulum lectin 1                                                 | 65.40187 | 72.14362 | 69.525   | 62.74071 | 75.54006 | 75.59453 |
| 17363828 | Ermp1        | endoplasmic reticulum metalloproteinase 1                                      | 73.84201 | 79.10626 | 76.38619 | 66.50035 | 71.28813 | 67.94097 |
| 17472199 | Erp27        | endoplasmic reticulum protein 27                                               | 12.42479 | 13.5845  | 12.48748 | 14.32437 | 13.01587 | 11.25317 |
| 17452194 | Erp29        | endoplasmic reticulum protein 29                                               | 39.97455 | 24.66426 | 22.01615 | 27.42786 | 30.35011 | 19.17427 |
| 17425160 | Erp44        | endoplasmic reticulum protein 44                                               | 75.78603 | 68.54502 | 61.50919 | 72.36248 | 73.93676 | 72.36248 |
| 17334932 | Ergic1       | endoplasmic reticulum-golgi intermediate compartment (ERGIC) 1                 | 160.6325 | 136.9466 | 165.7563 | 115.9613 | 123.8843 | 119.9484 |
| 17400412 | Ensa         | endosulfine alpha                                                              | 24.38885 | 24.07393 | 22.72251 | 22.6351  | 22.98101 | 17.69402 |
| 17353650 | Ecsr         | endothelial cell surface expressed chemotaxis and apoptosis regulator          | 10.52333 | 17.1548  | 15.64067 | 13.42732 | 11.72503 | 14.32884 |
| 17516074 | Esam         | endothelial cell-specific adhesion molecule                                    | 13.22458 | 14.60641 | 14.31296 | 11.61913 | 10.99206 | 13.38152 |
| 17290010 | Esm1         | endothelial cell-specific molecule 1                                           | 6.516874 | 7.263727 | 5.474549 | 5.084373 | 7.535274 | 7.94441  |
| 17368096 | Edf1         | endothelial differentiation-related factor 1                                   | 6.484611 | 6.979724 | 7.140623 | 5.299    | 7.804575 | 6.759376 |
| 17340197 | Epas1        | endothelial PAS domain protein 1                                               | 202.7798 | 262.9838 | 277.3704 | 196.9957 | 256.5133 | 189.3012 |
| 17415469 | Tek          | endothelial-specific receptor tyrosine kinase                                  | 33.08029 | 23.84856 | 32.59977 | 27.42405 | 24.66375 | 18.58659 |
| 17286830 | Edn1         | endothelin 1                                                                   | 6.469436 | 6.24032  | 7.698994 | 5.499803 | 5.843043 | 5.525404 |
| 17417976 | Edn2         | endothelin 2                                                                   | 11.24896 | 12.85333 | 12.49778 | 12.96922 | 10.83149 | 13.26948 |
| 17380377 | Edn3         | endothelin 3                                                                   | 22.36669 | 19.17148 | 18.25753 | 22.86042 | 17.5924  | 20.9023  |
| 17420347 | Ece1         | endothelin converting enzyme 1                                                 | 284.8029 | 263.5385 | 249.0549 | 224.4686 | 226.6575 | 200.6518 |
| 17324001 | Ece2         | endothelin converting enzyme 2                                                 | 9.664667 | 11.39177 | 11.78557 | 11.40908 | 9.704138 | 12.12346 |
| 17225224 | Ecel1        | endothelin converting enzyme-like 1                                            | 6.949841 | 7.484988 | 6.596497 | 7.374729 | 6.651086 | 8.03412  |
| 17510685 | Ednra        | endothelin receptor type A                                                     | 23.57621 | 24.02776 | 25.86914 | 20.29525 | 18.75912 | 20.25856 |
| 17309268 | Ednrb        | endothelin receptor type B                                                     | 66.69469 | 62.53015 | 65.65213 | 55.02785 | 27.74296 | 36.06231 |
| 17424276 | Enho         | energy homeostasis associated                                                  | 21.5828  | 22.64201 | 24.43335 | 26.87774 | 23.10319 | 27.18728 |
| 17216676 | En1          | engrailed 1                                                                    | 3.462322 | 3.93071  | 3.393585 | 3.412006 | 3.792082 | 3.437763 |

|          |               |                                                                                |          |          |          |          |          |          |
|----------|---------------|--------------------------------------------------------------------------------|----------|----------|----------|----------|----------|----------|
| 17435592 | En2           | engrailed 2                                                                    | 5.892501 | 4.874959 | 6.1638   | 4.388537 | 4.113368 | 5.92075  |
| 17285559 | Elmo1         | engulfment and cell motility 1                                                 | 16.56699 | 15.9867  | 16.38768 | 13.95016 | 14.01792 | 12.25595 |
| 17394405 | Elmo2         | engulfment and cell motility 2                                                 | 23.17103 | 21.23026 | 22.92278 | 19.08504 | 17.31643 | 20.32073 |
| 17504727 | Elmo3         | engulfment and cell motility 3                                                 | 28.99536 | 29.68084 | 26.25299 | 27.46876 | 29.55725 | 28.73247 |
| 17517780 | Edc3          | enhancer of mRNA decapping 3 homolog (S. cerevisiae)                           | 25.51529 | 39.56547 | 31.82768 | 39.22768 | 27.94833 | 33.77608 |
| 17504964 | Edc4          | enhancer of mRNA decapping 4                                                   | 20.44874 | 20.09786 | 20.21298 | 23.98034 | 18.5768  | 16.3414  |
| 17352493 | Epc1          | enhancer of polycomb homolog 1 (Drosophila)                                    | 26.9963  | 31.97849 | 32.85133 | 28.1718  | 36.1855  | 32.528   |
| 17370641 | Epc2          | enhancer of polycomb homolog 2 (Drosophila)                                    | 30.92411 | 36.16219 | 28.83362 | 31.42694 | 30.34675 | 35.14725 |
| 17282274 | Erh           | enhancer of rudimentary homolog (Drosophila)                                   | 11.20826 | 9.697481 | 7.899547 | 8.403673 | 11.43069 | 12.28427 |
| 17405069 | 1700018B24Rik | enhancer of rudimentary homolog pseudogene                                     | 4.063323 | 4.20927  | 3.844324 | 4.194416 | 4.596928 | 3.279259 |
| 17311343 | Eny2          | enhancer of yellow 2 homolog (Drosophila)                                      | 82.93677 | 102.2821 | 86.44736 | 83.67009 | 121.4695 | 127.1097 |
| 17269809 | Ezh1          | enhancer of zeste 1 polycomb repressive complex 2 subunit                      | 48.2869  | 60.14863 | 63.16135 | 63.16135 | 63.16135 | 64.06258 |
| 17466507 | Ezh2          | enhancer of zeste 2 polycomb repressive complex 2 subunit                      | 21.41144 | 22.83825 | 21.41144 | 24.29454 | 21.14097 | 23.20735 |
| 17367390 | Etl4          | enhancer trap locus 4                                                          | 20.42353 | 15.89367 | 16.87926 | 13.35039 | 13.94659 | 14.83826 |
| 17512494 | Enkd1         | enkurin domain containing 1                                                    | 12.05074 | 12.42436 | 12.42436 | 11.24265 | 13.48609 | 12.58619 |
| 17382139 | Enkur         | enkurin, TRPC channel interacting protein                                      | 2.582915 | 2.205078 | 2.500541 | 2.636876 | 3.049198 | 2.296059 |
| 17421908 | Eno1          | enolase 1, alpha non-neuron                                                    | 6.734543 | 8.886344 | 7.603059 | 7.936759 | 8.993546 | 8.637417 |
| 17350437 | Eno1b         | enolase 1B, retrotransposed                                                    | 2.193645 | 1.903283 | 2.735529 | 1.899474 | 2.317437 | 2.498133 |
| 17470846 | Eno2          | enolase 2, gamma neuronal                                                      | 8.225139 | 9.928598 | 10.71701 | 10.78803 | 8.068833 | 7.470164 |
| 17252183 | Eno3          | enolase 3, beta muscle                                                         | 23.84013 | 22.29379 | 22.62789 | 22.97973 | 20.97545 | 22.62789 |
| 17360800 | Eno4          | enolase 4                                                                      | 4.00941  | 4.20927  | 4.325179 | 4.099307 | 4.20927  | 3.887466 |
| 17439563 | Enoph1        | enolase-phosphatase 1                                                          | 25.23843 | 22.16452 | 26.6808  | 30.36947 | 24.63231 | 26.46236 |
| 17475975 | Ech1          | enoyl Coenzyme A hydratase 1, peroxisomal                                      | 935.8412 | 950.0963 | 933.6513 | 852.077  | 745.3995 | 774.9933 |
| 17232426 | Echdc1        | enoyl Coenzyme A hydratase domain containing 1                                 | 96.161   | 88.7546  | 90.76474 | 96.161   | 106.7136 | 106.6773 |
| 17416616 | Echdc2        | enoyl Coenzyme A hydratase domain containing 2                                 | 141.1798 | 174.2518 | 188.7928 | 179.8637 | 173.0962 | 161.2986 |
| 17381457 | Echdc3        | enoyl Coenzyme A hydratase domain containing 3                                 | 40.56124 | 42.29455 | 42.59375 | 48.78886 | 47.22831 | 42.29455 |
| 17497612 | Echs1         | enoyl Coenzyme A hydratase, short chain, 1, mitochondrial                      | 238.0218 | 275.0328 | 270.5854 | 285.8194 | 289.1371 | 308.7938 |
| 17334253 | Eci1          | enoyl-Coenzyme A delta isomerase 1                                             | 245.868  | 270.6923 | 258.7724 | 260.659  | 245.2518 | 244.0258 |
| 17291833 | Eci2          | enoyl-Coenzyme A delta isomerase 2                                             | 192.2727 | 276.3954 | 218.7259 | 197.5727 | 214.1043 | 190.3248 |
| 17291821 | Eci3          | enoyl-Coenzyme A delta isomerase 3                                             | 7.160399 | 5.833129 | 6.77927  | 4.557492 | 5.785092 | 4.781655 |
| 17329220 | Ehhadh        | enoyl-Coenzyme A, hydratase/3-hydroxyacyl Coenzyme A dehydrogenase             | 1168.013 | 1708.317 | 1644.793 | 1324.186 | 755.9987 | 865.0921 |
| 17319412 | Enthd1        | ENTH domain containing 1                                                       | 9.177365 | 8.727691 | 8.448587 | 8.698098 | 8.893245 | 11.47864 |
| 17273003 | Enthd2        | ENTH domain containing 2                                                       | 19.86367 | 14.26215 | 17.07555 | 16.79826 | 15.66204 | 17.92026 |
| 17272262 | Evpl          | envoplakin                                                                     | 7.875328 | 9.441002 | 9.361307 | 7.698994 | 10.01389 | 7.926258 |
| 17522876 | Eomes         | eomesodermin homolog (Xenopus laevis)                                          | 3.81108  | 6.901835 | 5.257147 | 4.20927  | 5.120306 | 3.506836 |
| 17267520 | Epx           | eosinophil peroxidase                                                          | 3.767924 | 4.468653 | 3.918442 | 5.108997 | 5.886092 | 5.112291 |
| 17305520 | Ear1          | eosinophil-associated, ribonuclease A family, member 1                         | 7.710156 | 2.645353 | 3.246578 | 3.316588 | 3.609828 | 3.812851 |
| 17305524 | Ear10         | eosinophil-associated, ribonuclease A family, member 10                        | 2.072138 | 1.920657 | 2.282951 | 2.442519 | 1.996496 | 2.072138 |
| 17299593 | Ear14         | eosinophil-associated, ribonuclease A family, member 14                        | 3.122497 | 3.393679 | 4.280265 | 3.10495  | 3.276624 | 3.415342 |
| 17299101 | Ear2          | eosinophil-associated, ribonuclease A family, member 2                         | 38.47502 | 40.60344 | 53.01909 | 35.94676 | 32.10642 | 40.72295 |
| 17299638 | Ear6          | eosinophil-associated, ribonuclease A family, member 6                         | 2.738527 | 3.133163 | 2.867453 | 3.10523  | 6.11677  | 2.97824  |
| 17375661 | Eid1          | EP300 interacting inhibitor of differentiation 1                               | 7.512953 | 7.351405 | 7.749375 | 8.483679 | 10.29142 | 7.487531 |
| 17475801 | Eid2          | EP300 interacting inhibitor of differentiation 2                               | 6.019568 | 6.183699 | 5.736457 | 6.970441 | 5.490167 | 6.171709 |
| 17475805 | Eid2b         | EP300 interacting inhibitor of differentiation 2B                              | 10.16607 | 8.840635 | 10.09704 | 9.759722 | 11.76207 | 9.734454 |
| 17235937 | Eid3          | EP300 interacting inhibitor of differentiation 3                               | 11.81698 | 11.40307 | 16.68894 | 14.87915 | 13.24752 | 10.30884 |
| 17290865 | Epdr1         | ependymin related protein 1 (zebrafish)                                        | 14.31177 | 18.88109 | 17.43193 | 17.10433 | 13.46619 | 16.79943 |
| 17466397 | Epha1         | Eph receptor A1                                                                | 52.96583 | 59.76132 | 61.02676 | 59.10507 | 57.96017 | 59.76132 |
| 17418367 | Epha10        | Eph receptor A10                                                               | 10.01007 | 11.50086 | 10.9119  | 8.671791 | 9.984914 | 10.16219 |
| 17421033 | Epha2         | Eph receptor A2                                                                | 21.83333 | 18.49649 | 21.39156 | 26.73134 | 26.6084  | 24.15031 |
| 17331380 | Epha3         | Eph receptor A3                                                                | 6.871285 | 7.108573 | 6.627938 | 6.652193 | 6.627938 | 6.627938 |
| 17224661 | Epha4         | Eph receptor A4                                                                | 7.157918 | 7.758512 | 8.089385 | 6.850124 | 5.935543 | 6.860292 |
| 17449129 | Epha5         | Eph receptor A5                                                                | 4.066507 | 4.142983 | 3.772236 | 3.929103 | 4.312397 | 3.751012 |
| 17331326 | Epha6         | Eph receptor A6                                                                | 3.062691 | 3.557367 | 3.557367 | 3.703322 | 3.703322 | 3.86755  |
| 17412296 | Epha7         | Eph receptor A7                                                                | 9.167002 | 9.144409 | 8.827592 | 9.503968 | 8.641789 | 8.540497 |
| 17431624 | Epha8         | Eph receptor A8                                                                | 8.93681  | 8.367055 | 8.044931 | 8.554598 | 7.354973 | 7.922249 |
| 17530183 | Ephb1         | Eph receptor B1                                                                | 4.178978 | 4.054489 | 4.291197 | 4.560905 | 3.524968 | 3.927279 |
| 17431588 | Ephb2         | Eph receptor B2                                                                | 6.033186 | 8.025549 | 6.645234 | 6.476031 | 6.549796 | 5.880749 |
| 17324163 | Ephb3         | Eph receptor B3                                                                | 11.07658 | 10.27987 | 10.02368 | 10.05276 | 7.705134 | 10.9932  |
| 17443539 | Ephb4         | Eph receptor B4                                                                | 30.66264 | 37.29344 | 40.10638 | 32.61333 | 29.94327 | 31.48821 |
| 17457807 | Ephb6         | Eph receptor B6                                                                | 5.285097 | 4.66695  | 5.235002 | 4.909173 | 5.322559 | 4.909173 |
| 17406990 | Efna1         | ephrin A1                                                                      | 78.00691 | 60.43574 | 87.65412 | 73.22072 | 71.97131 | 63.23099 |
| 17235243 | Efna2         | ephrin A2                                                                      | 6.522975 | 6.750152 | 8.733258 | 6.561838 | 7.935109 | 5.846527 |
| 17407001 | Efna3         | ephrin A3                                                                      | 6.111261 | 5.252084 | 5.516679 | 4.939277 | 5.220942 | 4.197208 |
| 17407010 | Efna4         | ephrin A4                                                                      | 3.679093 | 3.679093 | 4.910058 | 3.170279 | 3.679093 | 3.818352 |
| 17346637 | Efna5         | ephrin A5                                                                      | 14.89463 | 15.19116 | 14.87461 | 18.60992 | 16.70491 | 18.73728 |
| 17536483 | Efnb1         | ephrin B1                                                                      | 45.6246  | 43.77818 | 43.77818 | 42.91738 | 40.39458 | 32.49599 |
| 17507321 | Efnb2         | ephrin B2                                                                      | 11.79178 | 12.64268 | 13.44959 | 11.648   | 11.74057 | 12.19553 |
| 17264769 | Efnb3         | ephrin B3                                                                      | 16.26411 | 16.83603 | 15.30435 | 18.22062 | 15.9578  | 15.53295 |
| 17410275 | Egfr          | epidermal growth factor                                                        | 3.15253  | 4.20927  | 4.20927  | 3.676671 | 4.359371 | 4.890595 |
| 17247389 | Egfr          | epidermal growth factor receptor                                               | 657.6791 | 648.6651 | 517.2041 | 756.9478 | 721.7023 | 363.7416 |
| 17416830 | Eps15         | epidermal growth factor receptor pathway substrate 15                          | 104.9414 | 105.2926 | 90.32103 | 96.161   | 101.2944 | 81.94364 |
| 17510498 | Eps15l1       | epidermal growth factor receptor pathway substrate 15-like 1                   | 29.12467 | 39.58083 | 38.82651 | 23.29454 | 38.3919  | 33.79458 |
| 17472235 | Eps8          | epidermal growth factor receptor pathway substrate 8                           | 9.278104 | 9.278104 | 11.09725 | 9.544436 | 9.011954 | 7.169189 |
| 17260744 | Egfrs         | epidermal growth factor receptor, opposite strand [Source:MGI Symbol;Acc:MGI:2 | 16.09622 | 13.9824  | 12.34949 | 10.68193 | 8.71258  | 10.13097 |
| 17247948 | Efemp1        | epidermal growth factor-containing fibulin-like extracellular matrix protein 1 | 14.45283 | 18.49649 | 18.91987 | 26.18393 | 19.96471 | 18.7134  |
| 17356447 | Efemp2        | epidermal growth factor-containing fibulin-like extracellular matrix protein 2 | 12.86643 | 17.45139 | 14.20592 | 14.31504 | 14.27551 | 14.20592 |
| 17394205 | Eppin         | epididymal peptidase inhibitor                                                 | 3.134836 | 2.42945  | 3.166217 | 3.283877 | 2.855909 | 3.53853  |
| 17299582 | Eddm3b        | epididymal protein 3B                                                          | 3.339703 | 3.613683 | 3.339703 | 2.877967 | 3.070748 | 3.339703 |
| 17231669 | Epm2a         | epilepsy, progressive myoclonic epilepsy, type 2 gene alpha                    | 10.84208 | 7.733599 | 10.39811 | 8.411599 | 10.84208 | 14.37958 |
| 17236821 | Epyc          | epiphycan                                                                      | 3.803295 | 2.993223 | 2.950072 | 3.068024 | 3.183315 | 3.893291 |
| 17439021 | Ereg          | epiregulin                                                                     | 6.447009 | 8.689059 | 8.457962 | 9.54146  | 7.183366 | 10.28892 |
| 17340272 | Epcam         | epithelial cell adhesion molecule                                              | 6.171709 | 5.58323  | 5.934967 | 5.381506 | 5.062711 | 5.385499 |
| 17239506 | Ect2l         | epithelial cell transforming sequence 2 oncogene-like                          | 4.070088 | 4.226197 | 4.193602 | 4.171019 | 4.20927  | 4.422769 |
| 17463781 | Emp1          | epithelial membrane protein 1                                                  | 13.26645 | 9.441068 | 13.2567  | 11.70189 | 8.804127 | 11.80299 |



|          |               |                                                                                   |          |          |          |          |          |          |
|----------|---------------|-----------------------------------------------------------------------------------|----------|----------|----------|----------|----------|----------|
| 17398769 | Etv3          | ets variant 3                                                                     | 20.46122 | 17.58971 | 15.88177 | 16.87166 | 13.7645  | 15.81783 |
| 17398779 | Etv3l         | ets variant 3-like                                                                | 11.23945 | 9.950438 | 11.72463 | 12.04081 | 11.72463 | 11.88385 |
| 17269954 | Etv4          | ets variant 4                                                                     | 8.398141 | 8.467112 | 7.796032 | 8.467112 | 9.402536 | 8.669748 |
| 17329298 | Etv5          | ets variant 5                                                                     | 11.99516 | 9.79829  | 10.3676  | 12.35189 | 9.79829  | 11.12752 |
| 17463673 | Etv6          | ets variant 6                                                                     | 58.09814 | 48.87653 | 64.91365 | 49.86999 | 45.82363 | 53.13461 |
| 17487898 | Erf           | Ets2 repressor factor                                                             | 10.36753 | 13.74467 | 13.74467 | 11.22536 | 14.49557 | 18.54502 |
| 17336758 | Ehmt2         | euchromatic histone lysine N-methyltransferase 2                                  | 61.82764 | 71.46228 | 65.37196 | 62.11845 | 66.00484 | 72.01672 |
| 17382303 | Ehmt1         | euchromatic histone methyltransferase 1                                           | 39.48876 | 34.77937 | 35.25901 | 36.93381 | 37.68164 | 32.42242 |
| 17327961 | Eef2kmt       | eukaryotic elongation factor 2 lysine methyltransferase                           | 21.87589 | 25.69009 | 22.42786 | 22.93613 | 18.49649 | 18.71898 |
| 17468719 | Eefsec        | eukaryotic elongation factor, selenocysteine-tRNA-specific                        | 71.33113 | 75.80652 | 79.89039 | 55.34611 | 58.36655 | 66.91093 |
| 17482560 | Eef2k         | eukaryotic elongation factor-2 kinase                                             | 13.65588 | 14.95235 | 12.97156 | 13.17709 | 16.00366 | 9.829786 |
| 17529062 | Eef1a1        | eukaryotic translation elongation factor 1 alpha 1                                | 30.64161 | 35.0157  | 38.81547 | 36.77364 | 37.81797 | 35.97443 |
| 17347353 | Gm6548        | eukaryotic translation elongation factor 1 alpha 1 pseudogene                     | 92.75287 | 115.9895 | 147.6349 | 141.9373 | 102.564  | 142.4597 |
| 17395766 | Eef1a2        | eukaryotic translation elongation factor 1 alpha 2                                | 23.0496  | 23.29293 | 22.88277 | 22.2279  | 22.2279  | 23.83418 |
| 17213580 | Eef1b2        | eukaryotic translation elongation factor 1 beta 2                                 | 251.2344 | 273.9578 | 252.2639 | 238.6678 | 272.3013 | 237.8091 |
| 17318210 | Eef1d         | eukaryotic translation elongation factor 1 delta (guanine nucleotide exchange pro | 75.23281 | 77.38274 | 72.32337 | 61.45251 | 75.64905 | 77.86807 |
| 17291964 | Eef1e1        | eukaryotic translation elongation factor 1 epsilon 1                              | 58.39771 | 59.14277 | 59.33946 | 50.64577 | 47.96898 | 53.62523 |
| 17357374 | Eef1g         | eukaryotic translation elongation factor 1 gamma                                  | 173.2774 | 157.7482 | 159.628  | 158.3606 | 159.628  | 139.1021 |
| 17235566 | Eef2          | eukaryotic translation elongation factor 2                                        | 1487.547 | 1384.894 | 1371.14  | 1376.387 | 1498.933 | 1345.251 |
| 17256345 | Eif1          | eukaryotic translation initiation factor 1                                        | 15.37112 | 17.26993 | 19.08609 | 19.82034 | 19.03668 | 20.15534 |
| 17548207 | Eif1-ps3      | eukaryotic translation initiation factor 1, pseudogene 3                          | 78.77468 | 86.7541  | 77.89614 | 86.06889 | 85.36484 | 78.96711 |
| 17350356 | Eif1a         | eukaryotic translation initiation factor 1A                                       | 106.681  | 70.56496 | 61.06018 | 72.17964 | 102.5682 | 57.7993  |
| 17356401 | Eif1ad        | eukaryotic translation initiation factor 1A domain containing                     | 35.52001 | 33.12526 | 32.93021 | 34.41105 | 33.39199 | 35.72594 |
| 17282958 | Gm5039        | eukaryotic translation initiation factor 1A pseudogene                            | 2.044035 | 2.429535 | 2.481049 | 2.563171 | 4.015529 | 3.389706 |
| 17539158 | Eif1ax        | eukaryotic translation initiation factor 1A, X-linked                             | 83.94718 | 88.0945  | 109.6947 | 99.05446 | 76.65723 | 76.19741 |
| 17523224 | Eif1b         | eukaryotic translation initiation factor 1B                                       | 47.08808 | 42.60675 | 47.28006 | 52.26162 | 60.30727 | 49.02175 |
| 17444398 | Eif2ak1       | eukaryotic translation initiation factor 2 alpha kinase 1                         | 85.5117  | 80.81157 | 68.41117 | 82.1609  | 72.05916 | 81.97318 |
| 17459425 | Eif2ak3       | eukaryotic translation initiation factor 2 alpha kinase 3                         | 45.97284 | 23.97153 | 27.66692 | 22.51477 | 31.37405 | 20.79335 |
| 17374519 | Eif2ak4       | eukaryotic translation initiation factor 2 alpha kinase 4                         | 11.6856  | 11.64929 | 11.55592 | 11.41105 | 11.58005 | 11.76704 |
| 17276732 | Eif2s1        | eukaryotic translation initiation factor 2, subunit 1 alpha                       | 75.43541 | 54.87891 | 46.85431 | 66.50819 | 59.8633  | 58.32449 |
| 17393192 | Eif2s2        | eukaryotic translation initiation factor 2, subunit 2 (beta)                      | 24.1612  | 27.07595 | 25.16663 | 23.53474 | 24.57603 | 18.78709 |
| 17533959 | Eif2s3x       | eukaryotic translation initiation factor 2, subunit 3, structural gene X-linked   | 3.15277  | 4.514481 | 3.617919 | 2.853001 | 3.337251 | 3.2776   |
| 17543229 | Eif2s3x       | eukaryotic translation initiation factor 2, subunit 3, structural gene X-linked   | 22.93104 | 26.35784 | 21.58429 | 25.5544  | 21.94804 | 17.97139 |
| 17546316 | Eif2s3y       | eukaryotic translation initiation factor 2, subunit 3, structural gene Y-linked   | 63.20426 | 71.77104 | 64.29256 | 60.45124 | 77.02634 | 80.72256 |
| 17397783 | Eif2a         | eukaryotic translation initiation factor 2A                                       | 58.86426 | 73.0276  | 65.56209 | 59.62064 | 70.58355 | 70.2307  |
| 17347355 | Eif2ak2       | eukaryotic translation initiation factor 2-alpha kinase 2                         | 47.51134 | 31.75782 | 33.81426 | 40.0561  | 30.37242 | 34.82786 |
| 17452873 | Eif2b1        | eukaryotic translation initiation factor 2B, subunit 1 (alpha)                    | 26.17359 | 24.37263 | 21.62338 | 21.06155 | 21.43713 | 26.84423 |
| 17277370 | Eif2b2        | eukaryotic translation initiation factor 2B, subunit 2 beta                       | 26.50844 | 31.08313 | 23.24647 | 27.0782  | 34.49439 | 24.39071 |
| 17417598 | Eif2b3        | eukaryotic translation initiation factor 2B, subunit 3                            | 22.62538 | 16.14796 | 18.7147  | 17.32136 | 14.68376 | 14.21153 |
| 17446881 | Eif2b4        | eukaryotic translation initiation factor 2B, subunit 4 delta                      | 21.49471 | 13.99762 | 15.30775 | 18.46447 | 20.57998 | 17.0733  |
| 17323888 | Eif2b5        | eukaryotic translation initiation factor 2B, subunit 5 epsilon                    | 38.35519 | 37.93059 | 34.95944 | 37.4886  | 41.2917  | 41.37536 |
| 17538188 | Eif2c5        | eukaryotic translation initiation factor 2C, 5                                    | 3.979204 | 4.681919 | 4.428843 | 4.510071 | 4.1435   | 2.731664 |
| 17216998 | Eif2d         | eukaryotic translation initiation factor 2D                                       | 32.41636 | 39.08871 | 35.43394 | 39.05621 | 35.89448 | 33.89804 |
| 17366093 | Eif3a         | eukaryotic translation initiation factor 3, subunit A                             | 327.0755 | 324.4337 | 324.2539 | 306.2105 | 335.0169 | 313.4236 |
| 17444080 | Eif3b         | eukaryotic translation initiation factor 3, subunit B                             | 161.7251 | 159.9392 | 155.7415 | 151.3841 | 157.8259 | 151.9939 |
| 17496283 | Eif3c         | eukaryotic translation initiation factor 3, subunit C                             | 240.8164 | 215.5606 | 223.8021 | 208.7077 | 211.8281 | 212.2116 |
| 17318907 | Eif3d         | eukaryotic translation initiation factor 3, subunit D                             | 176.5313 | 140.4692 | 144.732  | 138.3261 | 148.7102 | 147.9976 |
| 17316804 | Eif3e         | eukaryotic translation initiation factor 3, subunit E                             | 80.7248  | 65.64076 | 64.74065 | 70.55371 | 71.38653 | 68.1759  |
| 17481640 | Eif3f         | eukaryotic translation initiation factor 3, subunit F                             | 93.60736 | 89.46739 | 85.21881 | 93.07746 | 106.8846 | 102.4794 |
| 17524523 | Eif3g         | eukaryotic translation initiation factor 3, subunit G                             | 156.6445 | 142.6089 | 126.2728 | 136.2564 | 156.7835 | 129.8012 |
| 17316986 | Eif3h         | eukaryotic translation initiation factor 3, subunit H                             | 142.8542 | 141.6238 | 141.5826 | 119.1017 | 144.8635 | 131.1078 |
| 17430436 | Eif3i         | eukaryotic translation initiation factor 3, subunit I                             | 122.2957 | 138.2677 | 142.4775 | 131.1915 | 144.1533 | 135.3705 |
| 17237807 | 4930503E24Rik | eukaryotic translation initiation factor 3, subunit I pseudogene                  | 2.666912 | 2.858285 | 2.154271 | 2.774023 | 3.573629 | 2.804046 |
| 17314512 | Gm4371        | eukaryotic translation initiation factor 3, subunit I pseudogene                  | 5.599585 | 6.702782 | 5.882421 | 7.108228 | 6.506808 | 7.382452 |
| 17375360 | Eif3j1        | eukaryotic translation initiation factor 3, subunit J1                            | 17.31079 | 18.77095 | 19.38246 | 19.72523 | 19.35279 | 18.65047 |
| 17354128 | Eif3j2        | eukaryotic translation initiation factor 3, subunit J2                            | 42.53003 | 44.8551  | 33.52092 | 40.79414 | 47.33023 | 44.16097 |
| 17488595 | Eif3k         | eukaryotic translation initiation factor 3, subunit K                             | 73.57175 | 84.81221 | 93.67291 | 84.81221 | 69.29455 | 69.82007 |
| 17312905 | Eif3l         | eukaryotic translation initiation factor 3, subunit L                             | 123.3274 | 97.23205 | 80.21499 | 96.26305 | 95.92268 | 96.86207 |
| 17389009 | Eif3m         | eukaryotic translation initiation factor 3, subunit M                             | 56.0946  | 57.90034 | 38.88926 | 55.97963 | 47.57033 | 46.50745 |
| 17420373 | Eif4g3        | eukaryotic translation initiation factor 4 gamma, 3                               | 79.89426 | 79.89426 | 87.48962 | 79.0942  | 71.87061 | 74.53003 |
| 17324064 | Eif4g1        | eukaryotic translation initiation factor 4, gamma 1                               | 358.5151 | 338.9997 | 334.0175 | 333.1458 | 338.0306 | 346.6005 |
| 17495135 | Eif4g2        | eukaryotic translation initiation factor 4, gamma 2                               | 881.8442 | 741.37   | 706.1153 | 686.5971 | 666.3517 | 803.5589 |
| 17264844 | Eif4a1        | eukaryotic translation initiation factor 4A1                                      | 42.94535 | 41.05824 | 43.38848 | 41.16054 | 40.31654 | 43.72147 |
| 17264865 | Eif4a1        | eukaryotic translation initiation factor 4A1                                      | 6077.406 | 5839.504 | 5983.069 | 5738.866 | 6362.288 | 6268.176 |
| 17324378 | Eif4a2        | eukaryotic translation initiation factor 4A2                                      | 104.5095 | 113.615  | 104.07   | 126.1687 | 97.79779 | 128.3607 |
| 17324396 | Eif4a2        | eukaryotic translation initiation factor 4A2                                      | 130.7512 | 79.86049 | 72.87995 | 106.2066 | 137.6509 | 122.7135 |
| 17324400 | Eif4a2        | eukaryotic translation initiation factor 4A2                                      | 13.01903 | 11.05334 | 10.27852 | 13.06504 | 15.40108 | 14.20493 |
| 17272895 | Eif4a3        | eukaryotic translation initiation factor 4A3                                      | 18.16312 | 13.87042 | 13.54154 | 13.54154 | 11.37031 | 13.54154 |
| 17315255 | Eif4b         | eukaryotic translation initiation factor 4B                                       | 239.7405 | 219.4502 | 219.7912 | 210.7604 | 249.7516 | 216.1816 |
| 17403138 | Eif4e         | eukaryotic translation initiation factor 4E                                       | 87.2359  | 98.43367 | 87.2359  | 99.44108 | 81.4092  | 82.02035 |
| 17500327 | Eif4ebp1      | eukaryotic translation initiation factor 4E binding protein 1                     | 87.26674 | 92.35704 | 96.11102 | 86.04623 | 92.00817 | 90.02664 |
| 17241228 | Eif4ebp2      | eukaryotic translation initiation factor 4E binding protein 2                     | 152.1035 | 178.165  | 196.8619 | 178.2527 | 204.5387 | 207.1655 |
| 17349715 | Eif4ebp3      | eukaryotic translation initiation factor 4E binding protein 3                     | 47.22766 | 37.93454 | 54.92762 | 84.68356 | 55.24033 | 43.81339 |
| 17287520 | Eif4e1b       | eukaryotic translation initiation factor 4E family member 1B                      | 2.517724 | 3.268979 | 3.44468  | 3.619449 | 2.782767 | 2.65623  |
| 17215222 | Eif4e2        | eukaryotic translation initiation factor 4E member 2                              | 30.61868 | 36.34664 | 33.54812 | 32.34857 | 31.89437 | 32.8675  |
| 17469446 | Eif4e3        | eukaryotic translation initiation factor 4E member 3                              | 19.93871 | 25.96165 | 25.19875 | 29.54311 | 27.37828 | 24.03009 |
| 17246520 | Eif4enif1     | eukaryotic translation initiation factor 4E nuclear import factor 1               | 25.96111 | 36.04957 | 39.9106  | 34.88561 | 36.67436 | 28.33179 |
| 17453421 | Eif4h         | eukaryotic translation initiation factor 4H                                       | 178.6609 | 179.306  | 152.3948 | 183.9895 | 169.5092 | 168.7695 |
| 17279148 | Eif5          | eukaryotic translation initiation factor 5                                        | 352.9206 | 409.7954 | 357.0816 | 332.9473 | 334.1843 | 331.1245 |
| 17265082 | Eif5a         | eukaryotic translation initiation factor 5A                                       | 66.05473 | 59.55497 | 63.08215 | 61.79593 | 58.79616 | 62.23137 |
| 17396492 | Eif5a2        | eukaryotic translation initiation factor 5A2                                      | 6.171709 | 7.806144 | 9.079293 | 7.045929 | 8.558097 | 7.396332 |
| 17212018 | Eif5b         | eukaryotic translation initiation factor 5B                                       | 56.75557 | 60.19159 | 53.55911 | 58.0933  | 64.75771 | 61.34399 |
| 17393357 | Eif6          | eukaryotic translation initiation factor 6                                        | 85.46371 | 88.97203 | 101.1218 | 66.59953 | 81.06234 | 64.77477 |
| 17353541 | Etf1          | eukaryotic translation termination factor 1                                       | 220.0275 | 241.0703 | 234.5644 | 226.909  | 236.3285 | 261.3356 |



|          |          |                                                                 |          |          |          |          |          |          |
|----------|----------|-----------------------------------------------------------------|----------|----------|----------|----------|----------|----------|
| 17268084 | AA623943 | expressed sequence AA623943                                     | 3.124445 | 2.640754 | 2.956643 | 2.839644 | 2.482287 | 4.057441 |
| 17368518 | AA645442 | expressed sequence AA645442 [Source:MGI Symbol;Acc:MGI:3035071] | 2.933718 | 2.701461 | 2.659196 | 2.131472 | 3.131991 | 2.949295 |
| 17503444 | AA672651 | expressed sequence AA672651 [Source:MGI Symbol;Acc:MGI:2142438] | 12.51737 | 12.21879 | 11.85144 | 13.34049 | 15.73058 | 16.49183 |
| 17352108 | AA684185 | expressed sequence AA684185                                     | 22.71699 | 23.63823 | 22.4895  | 25.8799  | 16.78755 | 22.58574 |
| 17335926 | AA692955 | expressed sequence AA692955                                     | 4.681043 | 5.241356 | 5.580522 | 5.6292   | 4.694235 | 4.349773 |
| 17455656 | AA792892 | expressed sequence AA792892                                     | 2.960129 | 2.744475 | 2.589583 | 2.26715  | 2.488748 | 2.868805 |
| 17439239 | AA792892 | expressed sequence AA792892 [Source:MGI Symbol;Acc:MGI:2140789] | 3.465564 | 3.081387 | 3.17006  | 2.945556 | 4.902202 | 3.749349 |
| 17216942 | AA986860 | expressed sequence AA986860                                     | 10.18088 | 10.89149 | 13.21514 | 12.55839 | 16.53957 | 16.13901 |
| 17403701 | AI115009 | expressed sequence AI115009                                     | 4.592087 | 4.364208 | 3.687569 | 3.406334 | 3.309424 | 4.891782 |
| 17384422 | AI182371 | expressed sequence AI182371                                     | 1101.238 | 940.5169 | 886.1333 | 894.5324 | 936.0878 | 931.3502 |
| 17289685 | AI197445 | expressed sequence AI197445                                     | 5.849973 | 6.015772 | 6.857962 | 5.323149 | 5.043132 | 5.676139 |
| 17425708 | AI314180 | expressed sequence AI314180                                     | 121.8118 | 116.1391 | 116.1745 | 121.1323 | 114.8654 | 121.6076 |
| 17480041 | AI314278 | expressed sequence AI314278                                     | 18.32371 | 22.03385 | 19.54015 | 21.54095 | 21.47461 | 21.8117  |
| 17240323 | AI317395 | expressed sequence AI317395                                     | 86.41681 | 93.27315 | 81.36464 | 92.54416 | 96.11302 | 105.2926 |
| 17342740 | AI413582 | expressed sequence AI413582                                     | 6.932761 | 9.945197 | 10.83825 | 10.48228 | 11.56746 | 8.420524 |
| 17515641 | AI414108 | expressed sequence AI414108                                     | 3.878342 | 4.127534 | 3.784572 | 2.871909 | 3.576727 | 3.330549 |
| 17425364 | AI427809 | expressed sequence AI427809                                     | 4.516421 | 4.595845 | 5.091497 | 3.913447 | 4.352065 | 3.749661 |
| 17500620 | AI429214 | expressed sequence AI429214                                     | 3.672239 | 3.802979 | 3.13962  | 3.756554 | 3.542947 | 3.331242 |
| 17282021 | AI463170 | expressed sequence AI463170                                     | 13.3933  | 15.09543 | 17.97949 | 16.31582 | 24.64187 | 20.43627 |
| 17291901 | AI463229 | expressed sequence AI463229                                     | 9.295871 | 8.757748 | 8.073924 | 10.9766  | 10.09529 | 8.646043 |
| 17424243 | AI464131 | expressed sequence AI464131                                     | 35.5572  | 35.72074 | 37.62788 | 32.43771 | 41.63226 | 35.39123 |
| 17483235 | AI467606 | expressed sequence AI467606                                     | 5.381693 | 6.048385 | 4.998135 | 5.692964 | 7.442256 | 4.905431 |
| 17452562 | AI480526 | expressed sequence AI480526 [Source:MGI Symbol;Acc:MGI:2140910] | 21.60225 | 30.41603 | 28.93773 | 25.24682 | 20.72169 | 28.27706 |
| 17425784 | AI481877 | expressed sequence AI481877                                     | 3.156094 | 3.0739   | 3.137445 | 3.137445 | 3.137445 | 3.137445 |
| 17401530 | AI504432 | expressed sequence AI504432                                     | 3.542996 | 3.184904 | 2.62748  | 3.147901 | 2.989118 | 3.308208 |
| 17446060 | AI506816 | expressed sequence AI506816                                     | 3.534803 | 3.510752 | 6.913757 | 4.026817 | 3.545625 | 5.223367 |
| 17421105 | AI507597 | expressed sequence AI507597                                     | 3.598162 | 3.726006 | 3.957968 | 4.650481 | 3.806724 | 3.540149 |
| 17527027 | AI593442 | expressed sequence AI593442                                     | 4.008521 | 3.557318 | 4.445051 | 3.128281 | 3.136727 | 4.269893 |
| 17212346 | AI597479 | expressed sequence AI597479                                     | 13.66932 | 15.92013 | 14.31296 | 16.31277 | 15.76234 | 19.55763 |
| 17403771 | AI606473 | expressed sequence AI606473                                     | 9.636438 | 8.597517 | 8.211638 | 8.993047 | 9.495606 | 8.068497 |
| 17230034 | AI607873 | expressed sequence AI607873                                     | 8.905089 | 13.25174 | 16.96301 | 13.15382 | 16.34605 | 15.18053 |
| 17392546 | AI646519 | expressed sequence AI646519                                     | 14.62515 | 15.30531 | 13.40649 | 15.5723  | 13.93992 | 13.49076 |
| 17338258 | AI661453 | expressed sequence AI661453                                     | 26.89582 | 24.17141 | 28.51423 | 27.75739 | 32.93912 | 26.89451 |
| 17254194 | AI662270 | expressed sequence AI662270                                     | 13.32635 | 15.50369 | 16.65381 | 12.38584 | 17.90053 | 15.49843 |
| 17356422 | AI837181 | expressed sequence AI837181                                     | 27.22254 | 33.15903 | 31.32147 | 31.71866 | 27.45962 | 29.49728 |
| 17447013 | AI839979 | expressed sequence AI839979                                     | 3.414703 | 3.592704 | 3.310112 | 4.825539 | 5.4248   | 2.942413 |
| 17362320 | AI846148 | expressed sequence AI846148                                     | 9.886158 | 11.14473 | 10.08053 | 9.039419 | 9.641115 | 7.60464  |
| 17391521 | AI847159 | expressed sequence AI847159                                     | 4.003467 | 3.752417 | 3.601031 | 3.680419 | 3.701757 | 3.730632 |
| 17479415 | AI854517 | expressed sequence AI854517                                     | 4.892901 | 4.306901 | 4.738104 | 4.649095 | 4.836422 | 4.20927  |
| 17458338 | AI854703 | expressed sequence AI854703                                     | 6.575634 | 6.204608 | 6.360191 | 5.345593 | 5.73443  | 6.194681 |
| 17489989 | AI987944 | expressed sequence AI987944                                     | 30.36211 | 24.15801 | 19.62336 | 15.23767 | 18.35231 | 18.06556 |
| 17376210 | AU015228 | expressed sequence AU015228                                     | 2.659804 | 2.659804 | 2.742763 | 3.184397 | 2.659804 | 3.264971 |
| 17329475 | AU015336 | expressed sequence AU015336 [Source:MGI Symbol;Acc:MGI:2146536] | 2.770449 | 2.720251 | 2.70883  | 3.309492 | 3.545625 | 2.970859 |
| 17536278 | AU015836 | expressed sequence AU015836                                     | 2.29334  | 2.656856 | 2.352998 | 2.936566 | 3.282762 | 2.539211 |
| 17346694 | AU016765 | expressed sequence AU016765                                     | 2.934958 | 4.604869 | 3.703322 | 5.019592 | 4.926285 | 4.20927  |
| 17485480 | AU018091 | expressed sequence AU018091                                     | 4.684743 | 4.20927  | 4.886969 | 5.104183 | 4.886969 | 4.953334 |
| 17526850 | AU019823 | expressed sequence AU019823                                     | 9.237932 | 6.399237 | 6.296674 | 7.933294 | 7.672783 | 8.733743 |
| 17376599 | AU019990 | expressed sequence AU019990                                     | 3.16738  | 3.904858 | 4.099989 | 3.575463 | 3.485172 | 3.605652 |
| 17492239 | AU020206 | expressed sequence AU020206 [Source:MGI Symbol;Acc:MGI:2142134] | 16.07247 | 16.82401 | 17.10552 | 15.30435 | 11.88566 | 15.30435 |
| 17315163 | AU021063 | expressed sequence AU021063                                     | 9.406513 | 7.22917  | 6.657544 | 8.811026 | 7.935109 | 7.935109 |
| 17327950 | AU021092 | expressed sequence AU021092                                     | 11.38459 | 10.24274 | 10.69808 | 7.227166 | 8.573593 | 10.04232 |
| 17429341 | AU022252 | expressed sequence AU022252                                     | 56.86937 | 52.40709 | 57.43905 | 60.32232 | 57.46255 | 61.70776 |
| 17539762 | AU022751 | expressed sequence AU022751                                     | 8.486325 | 8.486325 | 9.310251 | 7.958133 | 8.486325 | 7.943088 |
| 17313852 | AU022754 | expressed sequence AU022754                                     | 4.582135 | 3.330203 | 3.723192 | 3.628115 | 4.279879 | 3.649098 |
| 17311263 | AU022793 | expressed sequence AU022793                                     | 3.368462 | 4.121787 | 3.884988 | 4.573536 | 5.303997 | 4.770796 |
| 17531804 | AU023762 | expressed sequence AU023762                                     | 3.62741  | 3.263274 | 3.114715 | 3.918224 | 3.263862 | 3.263862 |
| 17418640 | AU040320 | expressed sequence AU040320                                     | 30.35558 | 25.57035 | 31.15626 | 28.21871 | 29.02793 | 29.02793 |
| 17266581 | AU040972 | expressed sequence AU040972                                     | 5.180998 | 6.422122 | 5.065203 | 3.599159 | 5.325031 | 4.330279 |
| 17235843 | AU041133 | expressed sequence AU041133                                     | 4.561347 | 5.319203 | 4.212247 | 5.173426 | 5.728113 | 4.57547  |
| 17375154 | AV039307 | expressed sequence AV039307                                     | 4.732295 | 4.274809 | 4.436002 | 4.138535 | 5.352972 | 3.729055 |
| 17428698 | AV051173 | expressed sequence AV051173                                     | 5.674054 | 5.566923 | 4.687699 | 4.489423 | 4.614358 | 5.124851 |
| 17523847 | AV064505 | expressed sequence AV064505                                     | 2.785468 | 2.824607 | 2.988103 | 2.713735 | 2.824607 | 3.191556 |
| 17537801 | AV320801 | expressed sequence AV320801                                     | 2.946393 | 2.193538 | 2.428407 | 2.532847 | 3.051143 | 2.550818 |
| 17422904 | AW011738 | expressed sequence AW011738                                     | 11.50086 | 11.50086 | 12.26385 | 14.31296 | 10.84193 | 11.06997 |
| 17501303 | AW046200 | expressed sequence AW046200                                     | 7.714646 | 8.466819 | 7.821688 | 11.02594 | 6.99629  | 7.291421 |
| 17398989 | AW047730 | expressed sequence AW047730                                     | 3.07953  | 5.819802 | 5.063553 | 4.799453 | 3.670076 | 4.531253 |
| 17362869 | AW112010 | expressed sequence AW112010                                     | 137.7836 | 152.5058 | 156.1328 | 153.0978 | 199.2464 | 191.8892 |
| 17313616 | AW121686 | expressed sequence AW121686                                     | 4.040937 | 4.656836 | 3.973692 | 3.676696 | 4.040937 | 3.74335  |
| 17490005 | AW146154 | expressed sequence AW146154                                     | 18.10128 | 15.93835 | 17.28849 | 19.39187 | 18.14588 | 31.77544 |
| 17285398 | AW209491 | expressed sequence AW209491                                     | 23.71881 | 16.92519 | 18.08786 | 18.77317 | 22.00486 | 20.00654 |
| 17295027 | AW495222 | expressed sequence AW495222                                     | 4.173738 | 4.235523 | 3.673563 | 5.115765 | 5.503273 | 4.485473 |
| 17451930 | AW549542 | expressed sequence AW549542                                     | 17.54758 | 25.98505 | 21.1615  | 25.47959 | 20.86958 | 28.38093 |
| 17315669 | AW549877 | expressed sequence AW549877                                     | 72.50256 | 74.42782 | 60.16114 | 74.64636 | 75.13431 | 80.59285 |
| 17525746 | AW551984 | expressed sequence AW551984                                     | 12.83205 | 9.783021 | 8.544582 | 11.23143 | 8.720313 | 9.783021 |
| 17349067 | AW554918 | expressed sequence AW554918                                     | 13.77137 | 16.03064 | 16.13722 | 14.58972 | 19.31085 | 18.14035 |
| 17541784 | AW822252 | expressed sequence AW822252                                     | 3.826618 | 4.603305 | 5.35698  | 3.417734 | 3.354459 | 3.460499 |
| 17507701 | BB014433 | expressed sequence BB014433                                     | 3.706275 | 4.554365 | 3.995345 | 3.706275 | 3.741042 | 3.459468 |
| 17233507 | BB019430 | expressed sequence BB019430                                     | 4.081983 | 3.834796 | 4.732984 | 4.20927  | 4.134635 | 4.186603 |
| 17427650 | BB031773 | expressed sequence BB031773                                     | 4.05359  | 3.369256 | 3.549707 | 4.163105 | 4.363906 | 2.913675 |
| 17292608 | BB123696 | expressed sequence BB123696                                     | 3.245071 | 3.186737 | 3.545084 | 2.485627 | 3.520816 | 3.106758 |
| 17456830 | BB283400 | expressed sequence BB283400                                     | 5.998493 | 5.355941 | 4.918676 | 5.752105 | 5.467192 | 5.622142 |
| 17277659 | BB287469 | expressed sequence BB287469                                     | 2.830997 | 2.924095 | 2.233289 | 2.606909 | 2.393646 | 2.803813 |
| 17385389 | BB557941 | expressed sequence BB557941                                     | 2.732459 | 2.953407 | 2.630414 | 3.174743 | 2.978777 | 3.049579 |
| 17362966 | BE692007 | expressed sequence BE692007                                     | 2.406006 | 2.473048 | 2.734657 | 2.22251  | 2.827486 | 2.269461 |

|          |           |                                                                     |          |          |          |          |          |          |
|----------|-----------|---------------------------------------------------------------------|----------|----------|----------|----------|----------|----------|
| 17430339 | C77080    | expressed sequence C77080                                           | 40.02834 | 53.76107 | 52.9919  | 54.00758 | 51.17403 | 48.84199 |
| 17543840 | C77370    | expressed sequence C77370                                           | 4.01461  | 4.086172 | 4.878407 | 4.428813 | 4.09465  | 3.667126 |
| 17264402 | C78197    | expressed sequence C78197 [Source:MGI Symbol;Acc:MGI:2144636]       | 3.768342 | 5.013541 | 6.409403 | 3.837429 | 4.687212 | 3.940394 |
| 17370076 | C79798    | expressed sequence C79798 [Source:MGI Symbol;Acc:MGI:2139494]       | 2.409911 | 2.912282 | 2.860426 | 2.606909 | 2.435605 | 2.640992 |
| 17491273 | C86187    | expressed sequence C86187                                           | 6.171709 | 6.377496 | 8.308454 | 5.409293 | 7.629931 | 8.532745 |
| 17275596 | C87198    | expressed sequence C87198                                           | 3.296214 | 3.695732 | 3.470347 | 3.909272 | 3.341695 | 3.515549 |
| 17449827 | C87414    | expressed sequence C87414                                           | 6.514119 | 7.530418 | 9.769197 | 8.433608 | 8.149322 | 13.5927  |
| 17455691 | C87414    | expressed sequence C87414                                           | 2.065498 | 2.255364 | 1.979945 | 1.974764 | 2.283426 | 3.097748 |
| 17455717 | C87414    | expressed sequence C87414                                           | 3.662808 | 4.661486 | 3.948186 | 4.054777 | 4.044777 | 3.990916 |
| 17460433 | C87436    | expressed sequence C87436                                           | 35.67793 | 26.53142 | 24.25954 | 20.29525 | 26.31877 | 25.49443 |
| 17427081 | C87499    | expressed sequence C87499                                           | 3.741327 | 3.001971 | 3.250046 | 4.132228 | 4.267822 | 4.798222 |
| 17432521 | C87977    | expressed sequence C87977                                           | 2.872924 | 2.146431 | 2.422455 | 2.942026 | 2.82265  | 2.355952 |
| 17477055 | EU599041  | expressed sequence EU599041                                         | 2.204926 | 1.85778  | 2.110508 | 2.255364 | 4.036962 | 2.09872  |
| 17498199 | R74862    | expressed sequence R74862                                           | 3.799501 | 4.372869 | 5.660737 | 4.790313 | 4.681043 | 4.171453 |
| 17246163 | Esy1      | extended synaptotagmin-like protein 1                               | 30.30555 | 30.88084 | 38.8397  | 28.67795 | 29.01788 | 32.7159  |
| 17279584 | Esy2      | extended synaptotagmin-like protein 2                               | 69.03997 | 76.77049 | 69.84379 | 69.93487 | 76.42962 | 68.37893 |
| 17530033 | Esy3      | extended synaptotagmin-like protein 3                               | 12.93798 | 13.55441 | 12.45825 | 12.2204  | 10.86059 | 14.72453 |
| 17315352 | Esp1      | extra spindle pole bodies 1, separase                               | 5.613731 | 8.386332 | 8.22645  | 9.664332 | 7.935109 | 7.500517 |
| 17407850 | Ecm1      | extracellular matrix protein 1                                      | 101.9947 | 146.5338 | 137.1052 | 127.2216 | 105.4525 | 134.2474 |
| 17287148 | Ecm2      | extracellular matrix protein 2, female organ and adipocyte specific | 4.110774 | 4.110774 | 4.050388 | 4.42645  | 3.838147 | 3.673232 |
| 17544816 | Esx1      | extraembryonic, spermatogenesis, homeobox 1                         | 5.99471  | 5.962263 | 5.768955 | 6.000572 | 5.48933  | 6.73968  |
| 17221375 | Eya1      | eyes absent 1 homolog (Drosophila)                                  | 5.48933  | 5.216058 | 5.871381 | 6.130182 | 5.779802 | 4.47448  |
| 17379692 | Eya2      | eyes absent 2 homolog (Drosophila)                                  | 8.458255 | 7.187649 | 5.940647 | 9.019016 | 7.617935 | 6.83978  |
| 17419443 | Eya3      | eyes absent 3 homolog (Drosophila)                                  | 43.12552 | 54.01432 | 54.31919 | 51.69132 | 43.68603 | 54.42019 |
| 17239719 | Eya4      | eyes absent 4 homolog (Drosophila)                                  | 4.438893 | 3.79358  | 4.596131 | 3.480875 | 5.063307 | 5.075219 |
| 17340609 | Ezr       | ezrin                                                               | 14.97278 | 16.05866 | 20.18736 | 16.88523 | 16.78755 | 15.78246 |
| 17219362 | F11r      | F11 receptor                                                        | 109.5792 | 118.8362 | 133.2951 | 124.1818 | 171.1978 | 137.7167 |
| 17535529 | F8a       | factor 8-associated gene A                                          | 5.740236 | 5.610619 | 5.405994 | 4.61711  | 4.988617 | 5.126236 |
| 17525363 | Foxred1   | FAD-dependent oxidoreductase domain containing 1                    | 41.9355  | 41.23593 | 56.18021 | 41.00875 | 43.73329 | 40.72859 |
| 17318895 | Foxred2   | FAD-dependent oxidoreductase domain containing 2                    | 4.681043 | 4.304274 | 4.188838 | 4.681043 | 4.681043 | 5.357834 |
| 17412202 | Faxc      | failed axon connections homolog (Drosophila)                        | 3.580547 | 2.857097 | 3.339703 | 3.339703 | 3.087138 | 3.656821 |
| 17500332 | Gm9731    | Fam58a pseudogene                                                   | 5.664977 | 4.301292 | 4.647678 | 4.801649 | 4.273387 | 5.521461 |
| 17442701 | Fam101a   | family with sequence similarity 101, member A                       | 9.750323 | 12.70884 | 13.85284 | 12.37511 | 12.71738 | 12.04181 |
| 17266038 | Fam101b   | family with sequence similarity 101, member B                       | 6.311837 | 7.525879 | 6.949167 | 6.949167 | 4.625182 | 7.838567 |
| 17369841 | Fam102a   | family with sequence similarity 102, member A                       | 85.63271 | 99.96215 | 103.9078 | 83.75538 | 69.40222 | 78.82766 |
| 17409463 | Fam102b   | family with sequence similarity 102, member B                       | 9.049073 | 8.911511 | 13.51173 | 11.27715 | 11.95258 | 9.568349 |
| 17479728 | Fam103a1  | family with sequence similarity 103, member A1                      | 11.95987 | 9.943267 | 11.63388 | 9.762428 | 11.69768 | 13.36493 |
| 17271600 | Fam104a   | family with sequence similarity 104, member A                       | 20.98185 | 21.58998 | 21.70747 | 19.16763 | 17.81363 | 22.49371 |
| 17316197 | Fam105a   | family with sequence similarity 105, member A                       | 4.980878 | 8.063186 | 9.404818 | 7.817189 | 8.18215  | 5.950001 |
| 17303433 | Fam107a   | family with sequence similarity 107, member A                       | 6.23872  | 6.992896 | 7.157422 | 5.802481 | 6.257689 | 7.294353 |
| 17366437 | Fam107b   | family with sequence similarity 107, member B                       | 25.43847 | 30.39222 | 31.67516 | 24.29454 | 26.53124 | 32.74312 |
| 17441999 | Fam109a   | family with sequence similarity 109, member A                       | 10.4745  | 11.86525 | 11.90792 | 12.69695 | 11.9366  | 13.8993  |
| 17313560 | Fam109b   | family with sequence similarity 109, member B                       | 6.287864 | 6.988293 | 5.984248 | 6.287864 | 6.25873  | 6.942715 |
| 17392887 | Fam110a   | family with sequence similarity 110, member A                       | 5.028716 | 6.294575 | 4.828751 | 5.663445 | 4.471658 | 5.681453 |
| 17392894 | Fam110a   | family with sequence similarity 110, member A                       | 11.1828  | 12.27584 | 10.27937 | 12.54073 | 9.077972 | 13.69901 |
| 17411575 | Fam110b   | family with sequence similarity 110, member B                       | 6.370868 | 6.855586 | 8.274488 | 6.433974 | 7.218304 | 5.878426 |
| 17274766 | Fam110c   | family with sequence similarity 110, member C                       | 4.616566 | 3.416289 | 5.045999 | 4.978462 | 4.839842 | 5.174574 |
| 17357815 | Fam111a   | family with sequence similarity 111, member A                       | 5.481193 | 7.224862 | 10.25852 | 9.369162 | 7.337456 | 5.961271 |
| 17437686 | Fam114a1  | family with sequence similarity 114, member A1                      | 71.09864 | 54.55993 | 62.8099  | 67.09624 | 76.54944 | 63.98226 |
| 17263033 | Fam114a2  | family with sequence similarity 114, member A2                      | 36.26535 | 33.95236 | 31.96652 | 29.01888 | 29.46826 | 34.91778 |
| 17255372 | Fam117a   | family with sequence similarity 117, member A                       | 6.757127 | 6.394715 | 6.834804 | 5.963627 | 4.868273 | 6.927477 |
| 17213338 | Fam117b   | family with sequence similarity 117, member B                       | 23.96389 | 31.90078 | 36.88034 | 31.89481 | 33.39731 | 34.01408 |
| 17313788 | Fam118a   | family with sequence similarity 118, member A                       | 17.09864 | 19.23391 | 19.06613 | 14.66891 | 19.18039 | 14.69456 |
| 17313799 | Fam118a   | family with sequence similarity 118, member A                       | 8.453566 | 13.22916 | 23.07134 | 9.418975 | 13.9579  | 13.75763 |
| 17525379 | Fam118b   | family with sequence similarity 118, member B                       | 16.46568 | 14.1825  | 15.6691  | 13.95016 | 12.49397 | 16.51609 |
| 17292370 | Fam120a   | family with sequence similarity 120, member A                       | 223.675  | 252.1276 | 258.1203 | 234.0025 | 227.5264 | 228.2672 |
| 17333553 | Fam120b   | family with sequence similarity 120, member B                       | 30.90182 | 30.41266 | 31.13769 | 27.51183 | 26.61154 | 34.33148 |
| 17538683 | Fam120c   | family with sequence similarity 120, member C                       | 18.521   | 15.89422 | 13.75051 | 18.99608 | 17.58142 | 16.38723 |
| 17287102 | Fam120aos | family with sequence similarity 120A, opposite strand               | 19.00794 | 23.75336 | 20.70131 | 22.10974 | 19.74205 | 23.75221 |
| 17363624 | Fam122a   | family with sequence similarity 122, member A                       | 15.63156 | 19.52201 | 19.84082 | 19.62336 | 22.14701 | 24.34511 |
| 17541745 | Fam122b   | family with sequence similarity 122, member B                       | 6.171709 | 7.445042 | 6.076792 | 6.124067 | 6.850978 | 6.005981 |
| 17534730 | Fam122c   | family with sequence similarity 122, member C                       | 3.824364 | 3.502294 | 4.202914 | 3.575488 | 3.627234 | 3.445253 |
| 17301147 | Fam124a   | family with sequence similarity 124, member A                       | 21.91672 | 17.36475 | 21.04448 | 18.29364 | 16.55506 | 14.88833 |
| 17224783 | Fam124b   | family with sequence similarity 124, member B                       | 6.560065 | 9.382615 | 5.463744 | 5.386134 | 4.122787 | 5.494355 |
| 17446100 | Fam126a   | family with sequence similarity 126, member A                       | 13.14926 | 18.49611 | 20.68481 | 15.8711  | 17.47524 | 17.92076 |
| 17223412 | Fam126b   | family with sequence similarity 126, member B                       | 30.66413 | 26.89955 | 23.82427 | 27.86843 | 20.13649 | 29.30246 |
| 17218186 | Fam129a   | family with sequence similarity 129, member A                       | 7.539088 | 10.4476  | 10.38205 | 10.67379 | 8.766373 | 8.091011 |
| 17370002 | Fam129b   | family with sequence similarity 129, member B                       | 17.03854 | 15.3561  | 19.65957 | 17.36523 | 17.84169 | 14.87997 |
| 17502260 | Fam129c   | family with sequence similarity 129, member C                       | 8.932166 | 7.509464 | 8.943627 | 7.690141 | 6.707337 | 7.792196 |
| 17467209 | Fam13a    | family with sequence similarity 13, member A                        | 49.26257 | 53.86439 | 63.08303 | 57.49801 | 57.29431 | 93.30872 |
| 17353420 | Fam13b    | family with sequence similarity 13, member B                        | 66.80388 | 69.46864 | 54.76491 | 59.79363 | 62.33887 | 54.08663 |
| 17234146 | Fam13c    | family with sequence similarity 13, member C                        | 7.200914 | 7.104041 | 7.698994 | 7.946007 | 7.104041 | 6.610594 |
| 17324112 | Fam131a   | family with sequence similarity 131, member A                       | 8.144409 | 6.992896 | 6.9431   | 5.532302 | 7.320387 | 6.309038 |
| 17466386 | Fam131b   | family with sequence similarity 131, member B                       | 9.890202 | 9.999667 | 9.803725 | 12.00223 | 9.155762 | 10.29855 |
| 17421060 | Fam131c   | family with sequence similarity 131, member C                       | 17.21185 | 22.63102 | 19.58911 | 16.68824 | 12.73529 | 18.84278 |
| 17422832 | Fam132a   | family with sequence similarity 132, member A                       | 5.259334 | 5.587876 | 6.591012 | 5.051914 | 6.171709 | 6.171709 |
| 17215762 | Fam132b   | family with sequence similarity 132, member B                       | 7.680446 | 9.340631 | 6.981514 | 8.832489 | 9.518076 | 8.51685  |
| 17434310 | Fam133b   | family with sequence similarity 133, member B                       | 30.89176 | 30.96121 | 30.96121 | 28.99073 | 30.96121 | 29.0531  |
| 17214409 | Fam134a   | family with sequence similarity 134, member A                       | 149.088  | 164.9266 | 167.8699 | 147.3272 | 162.236  | 178.228  |
| 17310637 | Fam134b   | family with sequence similarity 134, member B                       | 107.5877 | 129.9056 | 124.1663 | 126.1809 | 206.1928 | 208.8698 |
| 17269769 | Fam134c   | family with sequence similarity 134, member C                       | 78.96    | 94.41604 | 89.93183 | 84.79163 | 93.86009 | 80.55599 |
| 17221792 | Fam135a   | family with sequence similarity 135, member A                       | 66.50819 | 66.8604  | 54.24619 | 63.69243 | 51.01996 | 51.34956 |
| 17317717 | Fam135b   | family with sequence similarity 135, member B                       | 2.659196 | 2.955414 | 3.202192 | 3.662325 | 2.780029 | 2.565091 |
| 17460393 | Fam136a   | family with sequence similarity 136, member A                       | 53.89427 | 45.62776 | 56.56979 | 77.61857 | 88.11587 | 63.19507 |

|          |             |                                                                                |          |          |          |          |          |          |
|----------|-------------|--------------------------------------------------------------------------------|----------|----------|----------|----------|----------|----------|
| 17310814 | Fam136b-ps  | family with sequence similarity 136, member B, pseudogene [Source:MGI Symbol:/ | 9.648536 | 4.775428 | 6.059799 | 9.605296 | 5.803728 | 5.724898 |
| 17509083 | Fam149a     | family with sequence similarity 149, member A                                  | 33.65432 | 29.36102 | 34.74949 | 31.28523 | 29.1378  | 28.73346 |
| 17297425 | Fam149b     | family with sequence similarity 149, member B                                  | 48.60625 | 43.5841  | 47.46394 | 50.02093 | 43.9969  | 39.76783 |
| 17210947 | Fam150a     | family with sequence similarity 150, member A                                  | 2.623349 | 2.688013 | 2.816357 | 3.107146 | 3.424278 | 2.657537 |
| 17274744 | Fam150b     | family with sequence similarity 150, member B                                  | 7.885051 | 7.708072 | 6.397863 | 7.41476  | 5.6556   | 6.544849 |
| 17294899 | Fam151b     | family with sequence similarity 151, member B                                  | 19.30122 | 21.49471 | 19.49997 | 19.38623 | 22.33787 | 21.06301 |
| 17507347 | Fam155a     | family with sequence similarity 155, member A                                  | 3.767428 | 3.777129 | 3.997367 | 3.864763 | 3.947447 | 4.430379 |
| 17428050 | Fam159a     | family with sequence similarity 159, member A                                  | 9.279004 | 8.891951 | 9.206227 | 8.158761 | 7.510505 | 8.420524 |
| 17295981 | Fam159b     | family with sequence similarity 159, member B                                  | 4.161143 | 6.595536 | 7.455887 | 6.052957 | 7.13622  | 8.103527 |
| 17406403 | Fam160a1    | family with sequence similarity 160, member A1                                 | 13.30992 | 10.75697 | 10.93067 | 12.18083 | 11.56762 | 8.231469 |
| 17406421 | Fam160a1    | family with sequence similarity 160, member A1                                 | 12.81712 | 8.771053 | 6.903414 | 8.703224 | 6.181556 | 6.391391 |
| 17494482 | Fam160a2    | family with sequence similarity 160, member A2                                 | 33.10782 | 34.41844 | 28.60588 | 34.41844 | 34.41844 | 34.46285 |
| 17360655 | Fam160b1    | family with sequence similarity 160, member B1                                 | 133.5522 | 145.3412 | 133.1529 | 128.8832 | 135.318  | 134.185  |
| 17308395 | Fam160b2    | family with sequence similarity 160, member B2                                 | 15.74443 | 17.93629 | 17.17978 | 21.52677 | 15.5009  | 18.72573 |
| 17247675 | Fam161a     | family with sequence similarity 161, member A                                  | 5.40326  | 4.889104 | 5.588147 | 5.997578 | 5.001081 | 4.755114 |
| 17282486 | Fam161b     | family with sequence similarity 161, member B                                  | 5.357983 | 5.04488  | 5.948888 | 6.37975  | 6.239801 | 5.948888 |
| 17330135 | Fam162a     | family with sequence similarity 162, member A                                  | 114.1874 | 133.9611 | 142.6791 | 132.3652 | 167.3738 | 155.8593 |
| 17240729 | Fam162b     | family with sequence similarity 162, member B                                  | 4.273594 | 4.768746 | 4.006021 | 4.537602 | 4.20927  | 3.976861 |
| 17228490 | Fam163a     | family with sequence similarity 163, member A                                  | 8.704733 | 10.55504 | 8.454093 | 8.46858  | 8.45931  | 8.12169  |
| 17383241 | Fam163b     | family with sequence similarity 163, member B                                  | 8.242774 | 7.172768 | 5.363111 | 7.513838 | 7.488413 | 6.01865  |
| 17367858 | Fam166a     | family with sequence similarity 166, member A                                  | 6.216963 | 7.698994 | 6.604869 | 7.035924 | 7.649206 | 8.829183 |
| 17424596 | Fam166b     | family with sequence similarity 166, member B                                  | 3.749946 | 4.430747 | 4.092578 | 4.168303 | 4.379542 | 4.76313  |
| 17301225 | Fam167a     | family with sequence similarity 167, member A                                  | 9.405796 | 8.503165 | 9.915874 | 8.536709 | 11.14736 | 10.18539 |
| 17430430 | Fam167b     | family with sequence similarity 167, member B                                  | 14.76941 | 12.51009 | 17.60179 | 11.23642 | 11.56746 | 8.786143 |
| 17480777 | Fam168a     | family with sequence similarity 168, member A                                  | 57.3905  | 53.69553 | 56.90881 | 52.35009 | 43.2117  | 52.37694 |
| 17222096 | Fam168b     | family with sequence similarity 168, member B                                  | 53.18362 | 58.71226 | 66.27717 | 57.24231 | 62.45867 | 64.04038 |
| 17289329 | Fam169a     | family with sequence similarity 169, member A                                  | 3.322018 | 3.84001  | 3.541793 | 3.720251 | 4.001137 | 4.559703 |
| 17479125 | Fam169b     | family with sequence similarity 169, member B                                  | 25.86788 | 29.33355 | 31.62426 | 33.09245 | 22.30971 | 28.45795 |
| 17350545 | Fam170a     | family with sequence similarity 170, member A                                  | 4.834846 | 4.566789 | 4.204429 | 4.555439 | 5.131818 | 4.571508 |
| 17298626 | Fam170b     | family with sequence similarity 170, member B                                  | 26.31439 | 21.4694  | 19.98367 | 28.07687 | 16.52135 | 24.85424 |
| 17366359 | Fam171a1    | family with sequence similarity 171, member A1                                 | 12.8454  | 10.50329 | 14.55013 | 9.376373 | 10.70275 | 13.9292  |
| 17270211 | Fam171a2    | family with sequence similarity 171, member A2                                 | 13.33402 | 13.57246 | 14.06415 | 11.73715 | 8.893924 | 11.4968  |
| 17372552 | Fam171b     | family with sequence similarity 171, member B                                  | 7.669699 | 11.29326 | 6.63543  | 7.669699 | 7.508892 | 8.280857 |
| 17288838 | Fam172a     | family with sequence similarity 172, member A                                  | 21.26811 | 26.87327 | 21.99754 | 22.02317 | 28.38801 | 18.25424 |
| 17342376 | Fam173a     | family with sequence similarity 173, member A                                  | 48.47671 | 38.88145 | 38.66537 | 37.04046 | 39.96098 | 41.35099 |
| 17310827 | Fam173b     | family with sequence similarity 173, member B                                  | 34.18473 | 34.31054 | 38.2021  | 35.84252 | 43.27704 | 35.20333 |
| 17216158 | Fam174a     | family with sequence similarity 174, member A                                  | 25.84924 | 28.82123 | 27.14868 | 28.91187 | 30.40655 | 34.15749 |
| 17479183 | Fam174b     | family with sequence similarity 174, member B                                  | 16.23708 | 15.50434 | 15.50434 | 14.15971 | 15.50434 | 13.97029 |
| 17450180 | Fam175a     | family with sequence similarity 175, member A                                  | 22.12047 | 26.32114 | 32.73019 | 30.37895 | 24.51393 | 28.04341 |
| 17450196 | Fam175a     | family with sequence similarity 175, member A                                  | 7.95703  | 9.441198 | 8.200546 | 7.698994 | 9.382094 | 6.788016 |
| 17484080 | Fam175b     | family with sequence similarity 175, member B                                  | 71.11638 | 71.48408 | 73.91114 | 65.55482 | 66.71087 | 67.49693 |
| 17359742 | Fam178a     | family with sequence similarity 178, member A                                  | 29.80722 | 29.54516 | 29.03055 | 28.98089 | 28.15248 | 31.2144  |
| 17222232 | Fam178b     | family with sequence similarity 178, member B                                  | 5.48431  | 4.925824 | 5.101318 | 4.311769 | 5.101318 | 5.091109 |
| 17339503 | Fam179a     | family with sequence similarity 179, member A                                  | 9.123011 | 9.143839 | 8.528488 | 9.407165 | 8.26503  | 11.16189 |
| 17275785 | Fam179b     | family with sequence similarity 179, member B                                  | 39.71054 | 25.73589 | 28.71654 | 34.26562 | 27.26787 | 24.59631 |
| 17465824 | Fam180a     | family with sequence similarity 180, member A                                  | 4.221366 | 8.050509 | 5.801114 | 6.365262 | 6.152616 | 7.664119 |
| 17278180 | Fam181a     | family with sequence similarity 181, member A                                  | 10.41665 | 9.908248 | 13.86254 | 10.41665 | 9.755731 | 11.37567 |
| 17480233 | Fam181b     | family with sequence similarity 181, member B                                  | 6.531933 | 6.996678 | 5.691978 | 5.442955 | 5.145923 | 6.338537 |
| 17263193 | Fam183b     | family with sequence similarity 183, member B                                  | 3.456447 | 3.660067 | 4.101097 | 4.192527 | 4.823933 | 4.22608  |
| 17240858 | Fam184a     | family with sequence similarity 184, member A                                  | 6.779599 | 5.48933  | 6.076329 | 4.94493  | 4.352065 | 4.86045  |
| 17447921 | Fam184b     | family with sequence similarity 184, member B                                  | 8.473042 | 9.955819 | 8.2301   | 9.18895  | 8.661639 | 9.307024 |
| 17435095 | Fam185a     | family with sequence similarity 185, member A                                  | 25.44782 | 26.00776 | 20.06042 | 27.05025 | 22.04149 | 24.10733 |
| 17321513 | Fam186b     | family with sequence similarity 186, member B                                  | 4.297775 | 4.025394 | 4.632047 | 4.515826 | 3.986465 | 4.297775 |
| 17257038 | Fam187a     | family with sequence similarity 187, member A                                  | 3.272311 | 4.205887 | 4.238224 | 4.739156 | 2.973269 | 4.15656  |
| 17476571 | Fam187b     | family with sequence similarity 187, member B                                  | 6.171709 | 7.541806 | 8.489326 | 8.489326 | 8.489326 | 10.68252 |
| 17381752 | Fam188a     | family with sequence similarity 188, member A                                  | 100.9747 | 77.20059 | 70.26041 | 79.20063 | 73.69577 | 66.21426 |
| 17458790 | Fam188b     | family with sequence similarity 188, member B                                  | 7.021796 | 6.818007 | 6.528538 | 6.805447 | 7.030221 | 6.718038 |
| 17405443 | Fam188b2-ps | family with sequence similarity 188, member B2, pseudogene                     | 3.211372 | 4.107071 | 4.002468 | 2.735453 | 2.646266 | 3.211372 |
| 17491831 | Fam189a1    | family with sequence similarity 189, member A1                                 | 19.91951 | 19.37091 | 19.96623 | 20.10984 | 21.41515 | 21.76473 |
| 17363559 | Fam189a2    | family with sequence similarity 189, member A2                                 | 8.863583 | 7.821905 | 7.056535 | 6.992896 | 5.741668 | 6.195153 |
| 17399314 | Fam189b     | family with sequence similarity 189, member B                                  | 6.188115 | 7.397409 | 7.216103 | 5.495688 | 4.898534 | 5.958503 |
| 17461114 | Fam19a1     | family with sequence similarity 19, member A1                                  | 4.386408 | 4.855063 | 5.161677 | 4.319906 | 3.732856 | 3.791792 |
| 17237787 | Fam19a2     | family with sequence similarity 19, member A2                                  | 5.431573 | 3.896962 | 4.227691 | 5.295915 | 4.610426 | 4.046094 |
| 17408755 | Fam19a3     | family with sequence similarity 19, member A3                                  | 7.316684 | 10.04211 | 8.222004 | 8.51685  | 5.494697 | 9.744918 |
| 17469282 | Fam19a4     | family with sequence similarity 19, member A4                                  | 5.628264 | 6.962522 | 6.512403 | 6.446205 | 6.437899 | 7.612868 |
| 17313976 | Fam19a5     | family with sequence similarity 19, member A5                                  | 8.167191 | 7.987865 | 8.181696 | 7.104041 | 8.422217 | 7.449843 |
| 17511868 | Fam192a     | family with sequence similarity 192, member A                                  | 89.09422 | 74.15541 | 83.66777 | 91.5165  | 94.3722  | 100.028  |
| 17436583 | Fam193a     | family with sequence similarity 193, member A                                  | 46.74208 | 49.46547 | 49.46547 | 48.75607 | 39.81665 | 45.56108 |
| 17292941 | Fam193b     | family with sequence similarity 193, member B                                  | 26.11669 | 25.34958 | 24.62787 | 35.29446 | 22.71274 | 22.29534 |
| 17342483 | Fam195a     | family with sequence similarity 195, member A                                  | 50.41915 | 56.78469 | 50.29454 | 57.93125 | 43.96215 | 63.31827 |
| 17273152 | Fam195b     | family with sequence similarity 195, member B                                  | 32.28853 | 38.01245 | 41.42788 | 46.95478 | 35.70217 | 38.62786 |
| 17497303 | Fam196a     | family with sequence similarity 196, member A                                  | 7.387263 | 8.799979 | 7.882428 | 7.692646 | 8.628142 | 7.692646 |
| 17248412 | Fam196b     | family with sequence similarity 196, member B                                  | 4.681043 | 4.681043 | 4.681043 | 4.294619 | 5.775637 | 4.681043 |
| 17523387 | Fam198a     | family with sequence similarity 198, member A                                  | 16.28182 | 10.86382 | 13.04215 | 20.78095 | 23.83038 | 15.98548 |
| 17398406 | Fam198b     | family with sequence similarity 198, member B                                  | 5.275727 | 3.545306 | 4.141548 | 4.887714 | 4.352065 | 4.521495 |
| 17537993 | Fam199x     | family with sequence similarity 199, X-linked                                  | 16.33404 | 15.71946 | 18.17017 | 16.81574 | 15.50659 | 19.09099 |
| 17271281 | Fam20a      | family with sequence similarity 20, member A                                   | 77.29001 | 86.44257 | 83.94951 | 76.59774 | 104.6363 | 94.10112 |
| 17228576 | Fam20b      | family with sequence similarity 20, member B                                   | 39.84951 | 34.838   | 40.3929  | 37.02454 | 37.57705 | 36.12235 |
| 17443901 | Fam20c      | family with sequence similarity 20, member C                                   | 52.65505 | 36.72168 | 39.77252 | 30.08266 | 38.62786 | 34.02469 |
| 17366067 | Fam204a     | family with sequence similarity 204, member A                                  | 14.62931 | 22.89372 | 19.99046 | 21.37689 | 17.54794 | 20.37432 |
| 17424468 | Fam205a1    | family with sequence similarity 205, member A1                                 | 7.709889 | 7.850366 | 8.493034 | 10.37292 | 11.60118 | 7.308017 |
| 17424476 | Fam205a1    | family with sequence similarity 205, member A1                                 | 3.791135 | 4.825706 | 3.085598 | 3.984669 | 4.035843 | 3.439837 |
| 17412987 | Fam205a2    | family with sequence similarity 205, member A2                                 | 9.230956 | 8.014042 | 10.13792 | 9.057482 | 7.637497 | 8.467053 |
| 17413094 | Fam205a2    | family with sequence similarity 205, member A2                                 | 11.12513 | 11.47952 | 15.03424 | 13.46386 | 12.43651 | 12.16437 |

|          |           |                                                                |          |          |          |          |          |          |
|----------|-----------|----------------------------------------------------------------|----------|----------|----------|----------|----------|----------|
| 17424415 | Fam205a2  | family with sequence similarity 205, member A2                 | 11.12513 | 11.47952 | 15.03424 | 13.46386 | 12.43651 | 12.16437 |
| 17434129 | Fam205a2  | family with sequence similarity 205, member A2                 | 9.230956 | 8.014042 | 10.13792 | 9.057482 | 7.637497 | 8.467053 |
| 17424483 | Fam205c   | family with sequence similarity 205, member C                  | 3.591061 | 3.211372 | 2.673853 | 3.422309 | 3.47868  | 3.476149 |
| 17414331 | Fam206a   | family with sequence similarity 206, member A                  | 9.446959 | 8.24809  | 10.75034 | 8.670709 | 7.10414  | 8.24809  |
| 17242296 | Fam207a   | family with sequence similarity 207, member A                  | 57.10242 | 55.34918 | 51.42115 | 56.43076 | 56.53801 | 56.3733  |
| 17298057 | Fam208a   | family with sequence similarity 208, member A                  | 73.78215 | 75.16244 | 69.68566 | 85.95979 | 83.59357 | 92.46529 |
| 17290217 | Fam208b   | family with sequence similarity 208, member B                  | 30.41477 | 27.56107 | 25.13507 | 28.74283 | 29.5425  | 24.70584 |
| 17380147 | Fam209    | family with sequence similarity 209                            | 7.268915 | 7.793979 | 7.517016 | 8.078122 | 6.717666 | 7.870635 |
| 17462059 | Fam21     | family with sequence similarity 21                             | 84.20477 | 105.3495 | 100.9572 | 86.56068 | 111.8623 | 122.3432 |
| 17355256 | Fam210a   | family with sequence similarity 210, member A                  | 96.38923 | 77.81466 | 68.48851 | 86.67476 | 79.81234 | 82.1609  |
| 17380102 | Fam210b   | family with sequence similarity 210, member B                  | 66.32358 | 65.57027 | 60.88901 | 65.41955 | 66.49436 | 48.06551 |
| 17531075 | Fam212a   | family with sequence similarity 212, member A                  | 5.48815  | 5.530002 | 5.560598 | 7.801329 | 5.319166 | 5.480927 |
| 17401408 | Fam212b   | family with sequence similarity 212, member B                  | 5.287296 | 5.528354 | 6.287864 | 5.701336 | 5.810612 | 5.334858 |
| 17305521 | Fam213a   | family with sequence similarity 213, member A                  | 130.6189 | 140.1755 | 136.5069 | 118.27   | 81.82104 | 85.49452 |
| 17433672 | Fam213b   | family with sequence similarity 213, member B                  | 18.9624  | 29.48972 | 23.8279  | 25.8695  | 18.63238 | 19.77506 |
| 17519364 | Fam214a   | family with sequence similarity 214, member A                  | 81.60694 | 78.40806 | 94.88447 | 109.1963 | 106.4329 | 119.4324 |
| 17424573 | Fam214b   | family with sequence similarity 214, member B                  | 12.99343 | 13.5608  | 14.97319 | 14.951   | 14.08707 | 14.28699 |
| 17452396 | Fam216a   | family with sequence similarity 216, member A                  | 9.225774 | 11.95871 | 12.95152 | 11.37031 | 12.44091 | 12.54334 |
| 17308808 | Fam216b   | family with sequence similarity 216, member B                  | 8.585487 | 10.92991 | 11.86977 | 10.70231 | 9.310251 | 12.28529 |
| 17291812 | Fam217a   | family with sequence similarity 217, member A                  | 3.797053 | 3.432501 | 3.716282 | 3.128107 | 3.416147 | 2.998062 |
| 17380604 | Fam217b   | family with sequence similarity 217, member B                  | 4.319158 | 5.880505 | 3.611705 | 4.366387 | 5.031993 | 4.168678 |
| 17424263 | Fam219a   | family with sequence similarity 219, member A                  | 11.16197 | 9.627625 | 10.94674 | 10.71129 | 10.52771 | 10.37428 |
| 17412875 | Fam219aos | family with sequence similarity 219, member A, opposite strand | 6.396089 | 5.802763 | 7.158464 | 7.982884 | 5.68358  | 7.453097 |
| 17517733 | Fam219b   | family with sequence similarity 219, member B                  | 7.26554  | 8.238376 | 6.704919 | 7.698994 | 7.008472 | 8.327884 |
| 17444364 | Fam220a   | family with sequence similarity 220, member A                  | 28.40317 | 24.87837 | 27.65139 | 27.25294 | 23.45429 | 26.56104 |
| 17458472 | Fam221a   | family with sequence similarity 221, member A                  | 3.462322 | 3.894235 | 3.570287 | 3.056117 | 3.296991 | 3.894235 |
| 17424792 | Fam221b   | family with sequence similarity 221, member B                  | 8.278217 | 11.01403 | 8.278217 | 11.20034 | 7.521602 | 6.347815 |
| 17440974 | Fam222a   | family with sequence similarity 222, member A                  | 14.09459 | 12.23787 | 12.36577 | 13.49731 | 13.21578 | 9.037602 |
| 17253452 | Fam222b   | family with sequence similarity 222, member B                  | 34.27726 | 40.10305 | 39.73642 | 39.33332 | 36.03008 | 37.56117 |
| 17319265 | Fam227a   | family with sequence similarity 227, member A                  | 4.655125 | 5.03454  | 5.72986  | 5.56106  | 5.56106  | 5.56106  |
| 17391036 | Fam227b   | family with sequence similarity 227, member B                  | 3.362793 | 2.560064 | 2.828368 | 3.028913 | 4.017895 | 3.292789 |
| 17279837 | Fam228a   | family with sequence similarity 228, member A                  | 6.079742 | 5.525749 | 5.455646 | 7.186902 | 6.026874 | 6.018233 |
| 17279849 | Fam228b   | family with sequence similarity 228, member B                  | 7.099365 | 5.322116 | 5.88344  | 5.979356 | 5.84357  | 6.589276 |
| 17419015 | Fam229a   | family with sequence similarity 229, member A                  | 11.68455 | 13.75315 | 8.765157 | 12.09493 | 11.63234 | 10.38148 |
| 17240239 | Fam229b   | family with sequence similarity 229, member B                  | 3.720174 | 3.944575 | 3.717364 | 3.681924 | 3.565464 | 4.387898 |
| 17342625 | Fam234a   | family with sequence similarity 234, member A                  | 61.34611 | 61.4802  | 52.97538 | 52.20189 | 51.66338 | 49.5705  |
| 17463761 | Fam234b   | family with sequence similarity 234, member B                  | 34.71073 | 33.39847 | 36.96966 | 31.53955 | 24.06492 | 27.8443  |
| 17484000 | Fam24a    | family with sequence similarity 24, member A                   | 2.632676 | 2.375482 | 2.570858 | 2.671907 | 5.128262 | 2.420659 |
| 17305028 | Fam25c    | family with sequence similarity 25, member C                   | 39.35213 | 30.69113 | 34.39126 | 28.9249  | 41.76377 | 27.22349 |
| 17240176 | Fam26d    | family with sequence similarity 26, member D                   | 3.95838  | 4.739221 | 4.836153 | 3.915129 | 4.893783 | 4.03741  |
| 17240181 | Fam26e    | family with sequence similarity 26, member E                   | 4.191016 | 6.218946 | 5.630644 | 5.050303 | 5.859591 | 5.627718 |
| 17240186 | Fam26f    | family with sequence similarity 26, member F                   | 8.050621 | 5.999532 | 6.078688 | 6.399326 | 7.143197 | 7.122827 |
| 17542678 | Fam3a     | family with sequence similarity 3, member A                    | 22.73921 | 20.02708 | 29.16589 | 20.78009 | 22.29224 | 21.38949 |
| 17332554 | Fam3b     | family with sequence similarity 3, member B                    | 3.023438 | 2.691704 | 2.956233 | 3.26038  | 2.946904 | 2.826918 |
| 17465062 | Fam3c     | family with sequence similarity 3, member C                    | 86.78237 | 89.31063 | 82.8368  | 82.72893 | 91.96226 | 86.10529 |
| 17502414 | Fam32a    | family with sequence similarity 32, member A                   | 104.1912 | 105.6369 | 129.2813 | 114.2777 | 156.964  | 142.0662 |
| 17305015 | Fam35a    | family with sequence similarity 35, member A                   | 40.49551 | 32.20427 | 26.36533 | 40.9196  | 47.58319 | 40.64427 |
| 17324637 | Fam43a    | family with sequence similarity 43, member A                   | 25.41327 | 27.19576 | 25.074   | 23.11921 | 13.84986 | 24.01377 |
| 17431768 | Fam43b    | family with sequence similarity 43, member B                   | 9.409708 | 12.9774  | 14.30483 | 15.68333 | 13.46582 | 14.66942 |
| 17360877 | Fam45a    | family with sequence similarity 45, member A                   | 73.30552 | 70.48918 | 72.57446 | 68.19197 | 68.19197 | 64.22798 |
| 17529316 | Fam46a    | family with sequence similarity 46, member A                   | 23.90748 | 15.81926 | 22.68631 | 23.39389 | 19.49537 | 20.05    |
| 17419608 | Fam46b    | family with sequence similarity 46, member B                   | 11.50086 | 11.50086 | 9.176856 | 14.07946 | 10.40554 | 14.14784 |
| 17408414 | Fam46c    | family with sequence similarity 46, member C                   | 22.07146 | 24.85855 | 29.98336 | 28.28588 | 21.54214 | 20.82811 |
| 17537163 | Fam46d    | family with sequence similarity 46, member D                   | 2.179746 | 2.036949 | 2.210435 | 2.169616 | 2.19512  | 2.20436  |
| 17536065 | Fam47c    | family with sequence similarity 47, member C                   | 3.200972 | 2.684382 | 3.200972 | 3.061927 | 3.373205 | 3.432096 |
| 17439116 | Fam47e    | family with sequence similarity 47, member E                   | 15.73974 | 15.38999 | 12.40234 | 17.94848 | 18.52678 | 17.69684 |
| 17274099 | Fam49a    | family with sequence similarity 49, member A                   | 23.75238 | 29.41112 | 26.88109 | 21.54095 | 19.44355 | 18.91842 |
| 17317486 | Fam49b    | family with sequence similarity 49, member B                   | 26.50128 | 23.24696 | 32.36068 | 24.67999 | 31.49149 | 24.56837 |
| 17535826 | Fam50a    | family with sequence similarity 50, member A                   | 56.20358 | 46.87998 | 50.29454 | 39.54847 | 60.49693 | 51.68307 |
| 17286510 | Fam50b    | family with sequence similarity 50, member B                   | 2.813391 | 2.785662 | 2.601115 | 2.891424 | 2.729525 | 2.915231 |
| 17447113 | Fam53a    | family with sequence similarity 53, member A                   | 15.46302 | 16.63823 | 16.39893 | 17.61021 | 16.15759 | 15.88034 |
| 17497113 | Fam53b    | family with sequence similarity 53, member B                   | 17.00739 | 19.12914 | 21.1615  | 19.95862 | 12.50021 | 21.24689 |
| 17349465 | Fam53c    | family with sequence similarity 53, member C                   | 45.52793 | 42.16108 | 40.93946 | 40.33471 | 45.50143 | 40.93946 |
| 17253133 | Fam57a    | family with sequence similarity 57, member A                   | 32.9679  | 24.6458  | 31.95213 | 28.56111 | 28.12381 | 23.51941 |
| 17483133 | Fam57b    | family with sequence similarity 57, member B                   | 6.865953 | 6.316871 | 6.004608 | 6.628259 | 6.088091 | 6.239801 |
| 17266516 | Fam58b    | family with sequence similarity 58, member B                   | 51.68917 | 48.06717 | 46.72588 | 51.51533 | 51.87113 | 59.02155 |
| 17473047 | Fam60a    | family with sequence similarity 60, member A                   | 19.36608 | 17.42637 | 20.29525 | 17.42637 | 15.15719 | 19.66461 |
| 17400291 | Fam63a    | family with sequence similarity 63, member A                   | 56.20046 | 67.03674 | 66.60045 | 74.71831 | 63.40523 | 57.3901  |
| 17528617 | Fam63b    | family with sequence similarity 63, member B                   | 21.73367 | 20.40202 | 27.22047 | 28.62254 | 32.14762 | 27.5248  |
| 17252310 | Fam64a    | family with sequence similarity 64, member A                   | 9.361307 | 9.361307 | 9.241199 | 10.15044 | 9.361307 | 9.361307 |
| 17504837 | Fam65a    | family with sequence similarity 65, member A                   | 15.8083  | 20.22854 | 19.70432 | 17.04315 | 16.975   | 18.10128 |
| 17285964 | Fam65b    | family with sequence similarity 65, member B                   | 9.776649 | 14.76572 | 12.53708 | 12.30148 | 11.59065 | 12.19367 |
| 17394740 | Fam65c    | family with sequence similarity 65, member C                   | 6.727078 | 7.312932 | 7.698994 | 7.709568 | 8.073308 | 8.044429 |
| 17450718 | Fam69a    | family with sequence similarity 69, member A                   | 25.4457  | 23.84079 | 22.18465 | 29.97442 | 16.81888 | 25.29324 |
| 17368349 | Fam69b    | family with sequence similarity 69, member B                   | 6.009646 | 6.764578 | 6.320111 | 6.711057 | 5.881891 | 6.070856 |
| 17352216 | Fam69c    | family with sequence similarity 69, member C                   | 4.647678 | 4.60771  | 4.687017 | 5.783689 | 5.735622 | 6.347815 |
| 17231029 | Fam71a    | family with sequence similarity 71, member A                   | 3.689947 | 3.606151 | 3.410374 | 3.203014 | 3.656694 | 4.593583 |
| 17248793 | Fam71b    | family with sequence similarity 71, member B                   | 6.3142   | 5.386134 | 5.291182 | 5.386134 | 5.102945 | 5.830178 |
| 17276702 | Fam71d    | family with sequence similarity 71, member D                   | 4.278633 | 2.927481 | 3.027737 | 3.61985  | 3.5108   | 3.22829  |
| 17477498 | Fam71e1   | family with sequence similarity 71, member E1                  | 4.968085 | 5.096935 | 5.051388 | 5.48933  | 5.697978 | 5.776798 |
| 17485910 | Fam71e2   | family with sequence similarity 71, member E2                  | 3.122129 | 2.768971 | 3.015025 | 3.363656 | 3.587702 | 3.898043 |
| 17456569 | Fam71f1   | family with sequence similarity 71, member F1                  | 6.675195 | 7.097987 | 5.811578 | 6.711336 | 6.20749  | 6.675195 |
| 17456560 | Fam71f2   | family with sequence similarity 71, member F2                  | 6.088935 | 7.014645 | 6.95982  | 7.020336 | 6.194552 | 6.295976 |
| 17217022 | Fam72a    | family with sequence similarity 72, member A                   | 4.295184 | 4.524035 | 4.39819  | 4.24793  | 4.604964 | 3.162992 |

|          |          |                                                                                      |          |          |          |          |          |          |
|----------|----------|--------------------------------------------------------------------------------------|----------|----------|----------|----------|----------|----------|
| 17411216 | Fam73a   | family with sequence similarity 73, member A                                         | 13.6277  | 14.10456 | 14.31296 | 11.79726 | 14.10456 | 13.68203 |
| 17369196 | Fam73b   | family with sequence similarity 73, member B                                         | 61.76296 | 58.22876 | 68.62061 | 59.29999 | 53.2039  | 62.86913 |
| 17430945 | Fam76a   | family with sequence similarity 76, member A                                         | 20.03096 | 28.86541 | 27.74143 | 24.38294 | 29.5802  | 26.26045 |
| 17514719 | Fam76b   | family with sequence similarity 76, member B                                         | 25.77356 | 28.62969 | 24.1818  | 25.33166 | 19.87854 | 22.07544 |
| 17383819 | Fam78a   | family with sequence similarity 78, member A                                         | 11.59676 | 11.09333 | 11.25754 | 12.11884 | 10.26719 | 11.83264 |
| 17383825 | Fam78a   | family with sequence similarity 78, member A                                         | 5.084585 | 7.225262 | 6.287864 | 6.287864 | 6.287864 | 6.287864 |
| 17219079 | Fam78b   | family with sequence similarity 78, member B                                         | 8.63227  | 7.577595 | 6.55511  | 6.459578 | 8.31848  | 7.303004 |
| 17287024 | Fam8a1   | family with sequence similarity 8, member A1                                         | 138.1546 | 106.5731 | 104.4269 | 111.1227 | 111.4552 | 119.9168 |
| 17528568 | Fam81a   | family with sequence similarity 81, member A                                         | 11.02969 | 11.49799 | 13.11422 | 15.78859 | 15.83582 | 12.04047 |
| 17294501 | Fam81b   | family with sequence similarity 81, member B                                         | 3.462658 | 3.566156 | 3.538284 | 2.832135 | 3.893587 | 3.489209 |
| 17311678 | Fam83a   | family with sequence similarity 83, member A                                         | 8.614279 | 8.150452 | 11.24818 | 7.451909 | 6.851786 | 5.880546 |
| 17528924 | Fam83b   | family with sequence similarity 83, member B                                         | 3.208035 | 2.550111 | 3.938019 | 3.45513  | 3.009972 | 2.617882 |
| 17393369 | Fam83c   | family with sequence similarity 83, member C                                         | 5.555551 | 5.934103 | 5.171382 | 5.545509 | 5.002364 | 4.738564 |
| 17378958 | Fam83d   | family with sequence similarity 83, member D                                         | 5.45145  | 5.579632 | 5.093439 | 6.833809 | 3.864522 | 5.021645 |
| 17478001 | Fam83e   | family with sequence similarity 83, member E                                         | 10.613   | 11.54983 | 10.34269 | 9.421652 | 10.10586 | 9.226414 |
| 17313158 | Fam83f   | family with sequence similarity 83, member F                                         | 4.915506 | 6.992896 | 4.995122 | 4.996369 | 5.837578 | 4.973736 |
| 17250624 | Fam83g   | family with sequence similarity 83, member G                                         | 8.622044 | 13.91945 | 7.273451 | 8.479505 | 11.94148 | 11.85234 |
| 17318249 | Fam83h   | family with sequence similarity 83, member H                                         | 24.4642  | 32.69436 | 34.55159 | 33.24833 | 39.02536 | 32.02774 |
| 17280041 | Fam84a   | family with sequence similarity 84, member A                                         | 13.26681 | 13.76268 | 11.56746 | 16.12894 | 12.054   | 12.28529 |
| 17317393 | Fam84b   | family with sequence similarity 84, member B                                         | 15.94089 | 23.60074 | 24.95038 | 20.49642 | 29.70821 | 17.51246 |
| 17514118 | Fam89a   | family with sequence similarity 89, member A                                         | 13.05472 | 15.87121 | 12.35189 | 16.61299 | 12.35189 | 12.35189 |
| 17361764 | Fam89b   | family with sequence similarity 89, member B                                         | 32.99922 | 46.71066 | 46.37804 | 46.0794  | 47.50278 | 45.93908 |
| 17499835 | Fam90a1a | family with sequence similarity 90, member A1A                                       | 6.171709 | 7.47032  | 7.304016 | 6.180099 | 9.033468 | 9.140671 |
| 17543246 | Fam90a1b | family with sequence similarity 90, member A1B                                       | 4.878238 | 4.908424 | 4.142868 | 4.22485  | 4.421819 | 4.142868 |
| 17423373 | Fam92a   | family with sequence similarity 92, member A                                         | 34.92262 | 45.73701 | 51.35775 | 49.4617  | 48.90161 | 38.83189 |
| 17513514 | Fam92b   | family with sequence similarity 92, member B                                         | 10.56155 | 9.974538 | 10.49565 | 11.65995 | 11.25668 | 9.368902 |
| 17518672 | Fam96a   | family with sequence similarity 96, member A                                         | 90.90892 | 82.70485 | 80.42154 | 76.44287 | 76.15833 | 69.86849 |
| 17512329 | Fam96b   | family with sequence similarity 96, member B                                         | 32.02907 | 31.97916 | 30.65881 | 32.22057 | 29.79338 | 31.0868  |
| 17347252 | Fam98a   | family with sequence similarity 98, member A                                         | 84.8075  | 58.85365 | 62.10597 | 67.65478 | 70.16502 | 60.82785 |
| 17374470 | Fam98b   | family with sequence similarity 98, member B                                         | 24.24844 | 16.98748 | 15.72175 | 19.2058  | 22.05402 | 18.49637 |
| 17488719 | Fam98c   | family with sequence similarity 98, member C                                         | 30.69454 | 32.39973 | 32.73178 | 31.03512 | 24.3392  | 35.89746 |
| 17416353 | Fam151a  | family with sequence similarity 151, member A                                        | 6.652147 | 6.332697 | 7.1068   | 6.965708 | 7.662632 | 8.21215  |
| 17469788 | Fancd2os | Fancd2 opposite strand                                                               | 6.992896 | 6.592566 | 7.217604 | 6.575862 | 7.727973 | 6.992896 |
| 17491800 | Fan1     | FANCD2/FANCI-associated nuclease 1                                                   | 14.25474 | 11.73162 | 10.63199 | 9.293165 | 13.69749 | 12.094   |
| 17273073 | Faap100  | Fanconi anemia core complex associated protein 100                                   | 12.19476 | 19.15302 | 18.32854 | 17.81549 | 13.65578 | 15.43764 |
| 17422510 | Faap20   | Fanconi anemia core complex associated protein 20                                    | 12.13237 | 16.4374  | 16.36612 | 14.83929 | 19.22418 | 17.71537 |
| 17489759 | Faap24   | Fanconi anemia core complex associated protein 24                                    | 12.0474  | 10.86653 | 10.49223 | 11.33176 | 13.1275  | 11.22202 |
| 17513908 | Fanca    | Fanconi anemia, complementation group A                                              | 5.721645 | 8.023435 | 6.179842 | 6.179842 | 6.179842 | 7.2396   |
| 17539586 | Fancb    | Fanconi anemia, complementation group B                                              | 2.611611 | 2.622713 | 2.639638 | 2.531548 | 3.13388  | 2.680923 |
| 17293573 | Fancc    | Fanconi anemia, complementation group C                                              | 4.648999 | 4.288491 | 4.20927  | 4.20927  | 3.301359 | 4.20927  |
| 17461739 | Fancd2   | Fanconi anemia, complementation group D2                                             | 4.720174 | 4.832936 | 4.832936 | 4.918403 | 4.093628 | 4.832936 |
| 17335312 | Fance    | Fanconi anemia, complementation group E                                              | 15.16696 | 13.5862  | 13.30097 | 14.26769 | 18.51638 | 12.51087 |
| 17491417 | Fancf    | Fanconi anemia, complementation group F                                              | 12.60339 | 16.71591 | 13.32922 | 13.95529 | 9.95782  | 12.91486 |
| 17424515 | Fancg    | Fanconi anemia, complementation group G                                              | 8.473629 | 8.205777 | 8.473629 | 9.187995 | 8.473629 | 9.267756 |
| 17479371 | Fanci    | Fanconi anemia, complementation group I                                              | 3.700269 | 3.642452 | 3.642452 | 3.630781 | 3.825664 | 3.19264  |
| 17247898 | Fancl    | Fanconi anemia, complementation group L                                              | 7.775632 | 6.959241 | 6.118042 | 7.269923 | 8.117525 | 6.581653 |
| 17275832 | Fancm    | Fanconi anemia, complementation group M                                              | 22.62789 | 13.59063 | 17.21984 | 22.26229 | 17.90164 | 20.82104 |
| 17403625 | Fubp1    | far upstream element (FUSE) binding protein 1                                        | 83.92915 | 81.62788 | 93.6132  | 89.39672 | 81.84033 | 81.9942  |
| 17369507 | Fubp3    | far upstream element (FUSE) binding protein 3                                        | 18.85898 | 23.39097 | 22.38065 | 23.21009 | 18.12539 | 17.44413 |
| 17307588 | Fdft1    | farnesyl diphosphate farnesyl transferase 1                                          | 139.6556 | 109.3508 | 148.0161 | 104.6487 | 157.9495 | 104.0188 |
| 17406908 | Fdfts    | farnesyl diphosphate synthetase                                                      | 87.41082 | 66.39718 | 90.53979 | 70.22778 | 97.91378 | 49.08363 |
| 17508471 | Fnta     | farnesyltransferase, CAAX box, alpha                                                 | 46.98245 | 48.55742 | 48.17224 | 45.70753 | 47.87067 | 53.05585 |
| 17276622 | Fntb     | farnesyltransferase, CAAX box, beta                                                  | 6.339548 | 5.976124 | 6.280546 | 5.976124 | 4.308961 | 6.88788  |
| 17358797 | Fas      | Fas (TNF receptor superfamily member 6)                                              | 87.86094 | 82.3051  | 74.2763  | 71.95235 | 71.22442 | 61.99844 |
| 17272198 | Fbfl1    | Fas (TNFRSF6) binding factor 1                                                       | 12.11741 | 13.51388 | 10.04245 | 10.71025 | 13.7791  | 12.12851 |
| 17498461 | Fadd     | Fas (TNFRSF6)-associated via death domain                                            | 15.30021 | 14.32566 | 17.00303 | 16.8253  | 23.91179 | 16.94632 |
| 17485421 | Faddos   | Fas (TNFRSF6)-associated via death domain, opposite strand [Source:MGI Symbol;]      | 5.592681 | 6.287864 | 5.566768 | 6.171709 | 6.07094  | 5.687324 |
| 17520679 | Faim     | Fas apoptotic inhibitory molecule                                                    | 29.72717 | 19.17401 | 30.14883 | 26.36112 | 33.29445 | 30.64819 |
| 17321582 | Faim2    | Fas apoptotic inhibitory molecule 2                                                  | 9.668419 | 10.63302 | 9.668419 | 9.379818 | 9.381379 | 10.52618 |
| 17530027 | Faiml    | Fas apoptotic inhibitory molecule like                                               | 2.597421 | 2.521391 | 2.326837 | 1.898013 | 2.195653 | 2.566371 |
| 17287471 | Faf2     | Fas associated factor family member 2                                                | 175.2949 | 156.3516 | 151.4943 | 145.0282 | 133.9304 | 151.4943 |
| 17336213 | Daxx     | Fas death domain-associated protein                                                  | 14.37659 | 20.3203  | 18.99898 | 19.62866 | 18.52742 | 17.41985 |
| 17228864 | Fasl     | Fas ligand (TNF superfamily, member 6)                                               | 3.937528 | 4.21733  | 3.806698 | 4.045085 | 3.806698 | 3.791319 |
| 17446185 | Fastk    | Fas-activated serine/threonine kinase                                                | 48.78853 | 59.39172 | 63.59934 | 64.18748 | 58.10257 | 57.41716 |
| 17416897 | Faf1     | Fas-associated factor 1                                                              | 51.37626 | 52.81039 | 52.99962 | 52.85874 | 48.77804 | 52.99962 |
| 17516010 | Fez1     | fasciculation and elongation protein zeta 1 (zyglin I)                               | 3.254802 | 4.251465 | 4.894868 | 4.526136 | 3.577223 | 3.753821 |
| 17347267 | Fez2     | fasciculation and elongation protein zeta 2 (zyglin II)                              | 40.3294  | 42.06126 | 43.5373  | 41.0944  | 38.83216 | 39.02265 |
| 17444267 | Fscn1    | fascin homolog 1, actin bundling protein (Strongylocentrotus purpuratus)             | 19.63016 | 18.84722 | 22.13504 | 21.39438 | 18.8433  | 18.62954 |
| 17259314 | Fscn2    | fascin homolog 2, actin-bundling protein, retinal (Strongylocentrotus purpuratus)    | 3.274648 | 4.284301 | 3.050488 | 3.703322 | 3.488169 | 2.997438 |
| 17456495 | Fscn3    | fascin homolog 3, actin-bundling protein, testicular (Strongylocentrotus purpuratus) | 5.571169 | 5.571169 | 5.564608 | 5.714669 | 5.715065 | 5.571169 |
| 17386297 | Fastkd1  | FAST kinase domains 1                                                                | 43.02341 | 33.18064 | 32.88049 | 39.25515 | 33.3023  | 47.01242 |
| 17213645 | Fastkd2  | FAST kinase domains 2                                                                | 22.08202 | 18.55737 | 18.35041 | 23.66626 | 22.27911 | 23.26872 |
| 17288370 | Fastkd3  | FAST kinase domains 3                                                                | 10.28985 | 8.316981 | 10.48366 | 10.88206 | 10.50584 | 10.59998 |
| 17391670 | Fastkd5  | FAST kinase domains 5                                                                | 18.49124 | 17.85628 | 16.03631 | 18.27931 | 18.62954 | 17.87573 |
| 17503784 | Fto      | fat mass and obesity associated                                                      | 25.67781 | 26.18176 | 31.11008 | 26.70911 | 30.05785 | 26.805   |
| 17300544 | Fitm1    | fat storage-inducing transmembrane protein 1                                         | 164.8648 | 182.5123 | 121.9267 | 144.7109 | 138.5142 | 148.3849 |
| 17394036 | Fitm2    | fat storage-inducing transmembrane protein 2                                         | 85.62677 | 92.34104 | 103.5576 | 95.77253 | 73.42503 | 80.06779 |
| 17500832 | Fat1     | FAT tumor suppressor homolog 1 (Drosophila)                                          | 57.63567 | 51.71353 | 58.97453 | 52.09453 | 53.13166 | 53.72717 |
| 17262964 | Fat2     | FAT tumor suppressor homolog 2 (Drosophila)                                          | 4.759203 | 4.20927  | 3.987515 | 3.887466 | 4.813746 | 3.164132 |
| 17524233 | Fat3     | FAT tumor suppressor homolog 3 (Drosophila)                                          | 4.850287 | 4.136011 | 4.249196 | 4.715661 | 3.237881 | 4.524819 |
| 17397185 | Fat4     | FAT tumor suppressor homolog 4 (Drosophila)                                          | 8.920719 | 8.127885 | 11.26301 | 9.143332 | 6.510417 | 7.198169 |
| 17513092 | Fa2h     | fatty acid 2-hydroxylase                                                             | 7.588475 | 7.74422  | 8.37843  | 7.73167  | 8.953924 | 7.683001 |
| 17428509 | Faah     | fatty acid amide hydrolase                                                           | 85.06596 | 72.01323 | 86.01343 | 83.3032  | 83.90181 | 96.50622 |
| 17459455 | Fabp1    | fatty acid binding protein 1, liver                                                  | 2411.843 | 2642.467 | 2290.854 | 2267.977 | 2405.698 | 2267.898 |

|          |           |                                                                                 |          |          |          |          |          |          |
|----------|-----------|---------------------------------------------------------------------------------|----------|----------|----------|----------|----------|----------|
| 17404098 | Fabp12    | fatty acid binding protein 12                                                   | 5.602109 | 5.129933 | 4.762041 | 4.990519 | 6.185199 | 5.216456 |
| 17402350 | Fabp2     | fatty acid binding protein 2, intestinal                                        | 392.0625 | 322.7605 | 305.3542 | 347.6954 | 335.3305 | 358.3735 |
| 17419215 | Fabp3     | fatty acid binding protein 3, muscle and heart                                  | 104.44   | 99.28405 | 107.8035 | 108.0856 | 89.87637 | 93.71707 |
| 17243761 | Fabp3-ps1 | fatty acid binding protein 3, muscle and heart, pseudogene 1 [Source:MGI Symbo  | 5.991304 | 23.45104 | 19.44005 | 9.137123 | 7.150727 | 4.797125 |
| 17404091 | Fabp4     | fatty acid binding protein 4, adipocyte                                         | 78.22783 | 105.3692 | 182.763  | 81.60355 | 141.6336 | 93.93299 |
| 17396056 | Fabp5     | fatty acid binding protein 5, epidermal                                         | 27.26012 | 25.97425 | 44.16097 | 23.29454 | 33.34087 | 20.61325 |
| 17548238 | Fabp5     | fatty acid binding protein 5, epidermal                                         | 12.11548 | 12.62884 | 17.26346 | 6.776592 | 13.33014 | 5.126236 |
| 17548717 | Fabp5     | fatty acid binding protein 5, epidermal                                         | 11.55151 | 11.24912 | 15.34025 | 6.624493 | 11.88401 | 4.147006 |
| 17261963 | Fabp6     | fatty acid binding protein 6, ileal (gastrotropin)                              | 6.14141  | 5.361735 | 5.120306 | 5.099055 | 4.266757 | 4.620343 |
| 17233384 | Fabp7     | fatty acid binding protein 7, brain                                             | 33.72111 | 36.30383 | 42.7357  | 40.6561  | 24.42269 | 35.47572 |
| 17404084 | Fabp9     | fatty acid binding protein 9, testis                                            | 3.026877 | 3.060506 | 3.026877 | 2.932294 | 3.505135 | 2.66115  |
| 17357460 | Fads1     | fatty acid desaturase 1                                                         | 676.6847 | 698.8795 | 927.3435 | 649.6505 | 769.2294 | 784.5274 |
| 17362595 | Fads2     | fatty acid desaturase 2                                                         | 1197.791 | 1415.965 | 2034.389 | 1362.594 | 1197.749 | 1359.302 |
| 17357444 | Fads3     | fatty acid desaturase 3                                                         | 22.53023 | 20.70863 | 22.77201 | 19.53081 | 19.15647 | 17.69046 |
| 17271842 | Fads6     | fatty acid desaturase domain family, member 6                                   | 34.12128 | 45.54719 | 48.32139 | 47.47579 | 42.34295 | 45.06108 |
| 17273348 | Fasn      | fatty acid synthase                                                             | 296.0137 | 144.6046 | 194.4547 | 175.1649 | 238.5553 | 150.2947 |
| 17481982 | Far1      | fatty acyl CoA reductase 1                                                      | 10.39365 | 10.83157 | 10.56002 | 9.361307 | 9.276882 | 9.361307 |
| 17495250 | Far1os    | fatty acyl CoA reductase 1, opposite strand                                     | 2.887798 | 3.149166 | 2.818622 | 2.501182 | 3.078057 | 2.917616 |
| 17464455 | Far2      | fatty acyl CoA reductase 2                                                      | 3.887385 | 3.787485 | 4.211751 | 3.787485 | 5.328687 | 4.293874 |
| 17472924 | Far2os1   | fatty acyl CoA reductase 2, opposite strand 1 [Source:MGI Symbol;Acc:MGI:441500 | 4.729803 | 3.553129 | 4.50907  | 3.22565  | 3.494098 | 4.552503 |
| 17472919 | Far2os2   | fatty acyl CoA reductase 2, opposite strand 2 [Source:MGI Symbol;Acc:MGI:192509 | 6.057741 | 5.69478  | 6.992896 | 6.171709 | 6.360984 | 6.171709 |
| 17277387 | Fos       | FBJ osteosarcoma oncogene                                                       | 10.89678 | 10.05701 | 9.431257 | 9.326333 | 9.145297 | 9.11511  |
| 17487211 | Fosb      | FBJ osteosarcoma oncogene B                                                     | 9.940786 | 9.258125 | 9.009331 | 9.076525 | 8.980838 | 9.737085 |
| 17524426 | Fbxl12    | F-box and leucine-rich repeat protein 12                                        | 11.18893 | 11.13817 | 11.321   | 10.37443 | 13.66326 | 9.903373 |
| 17514998 | Fbxl12os  | F-box and leucine-rich repeat protein 12, opposite strand                       | 4.71406  | 3.703322 | 3.703322 | 3.659686 | 3.594223 | 3.518596 |
| 17445833 | Fbxl13    | F-box and leucine-rich repeat protein 13                                        | 3.714145 | 4.522154 | 3.81293  | 3.754732 | 3.738786 | 3.754732 |
| 17462285 | Fbxl14    | F-box and leucine-rich repeat protein 14                                        | 26.85744 | 25.83491 | 30.43902 | 28.58071 | 29.36244 | 20.39198 |
| 17359994 | Fbxl15    | F-box and leucine-rich repeat protein 15                                        | 12.54934 | 14.43811 | 16.04943 | 16.87692 | 14.57749 | 16.07147 |
| 17334782 | Fbxl16    | F-box and leucine-rich repeat protein 16                                        | 5.549778 | 7.225162 | 7.070146 | 7.173166 | 6.344735 | 3.974077 |
| 17346647 | Fbxl17    | F-box and leucine-rich repeat protein 17                                        | 47.42875 | 51.58573 | 48.1926  | 51.17829 | 51.47964 | 38.91974 |
| 17454740 | Fbxl18    | F-box and leucine-rich repeat protein 18                                        | 14.56971 | 15.47256 | 15.00561 | 15.83593 | 12.51763 | 13.7107  |
| 17483424 | Fbxl19    | F-box and leucine-rich repeat protein 19                                        | 13.43412 | 14.78928 | 11.00632 | 14.37909 | 10.79738 | 15.17663 |
| 17531834 | Fbxl2     | F-box and leucine-rich repeat protein 2                                         | 4.252585 | 4.965538 | 5.089028 | 6.180528 | 5.42811  | 5.139258 |
| 17268729 | Fbxl20    | F-box and leucine-rich repeat protein 20                                        | 28.26589 | 27.92896 | 33.29445 | 30.84789 | 33.01249 | 35.97244 |
| 17287814 | Fbxl21    | F-box and leucine-rich repeat protein 21                                        | 6.612794 | 6.117363 | 8.241575 | 5.962552 | 6.17295  | 8.548315 |
| 17528350 | Fbxl22    | F-box and leucine-rich repeat protein 22                                        | 14.57819 | 23.40573 | 13.63724 | 17.09461 | 14.11581 | 21.17353 |
| 17309161 | Fbxl3     | F-box and leucine-rich repeat protein 3                                         | 47.51628 | 51.62543 | 46.89493 | 51.30936 | 59.48607 | 58.56107 |
| 17412213 | Fbxl4     | F-box and leucine-rich repeat protein 4                                         | 15.88397 | 16.01342 | 16.10269 | 16.23595 | 15.91395 | 16.23595 |
| 17447803 | Fbxl5     | F-box and leucine-rich repeat protein 5                                         | 43.48452 | 36.01959 | 34.02681 | 36.24776 | 29.29718 | 34.40866 |
| 17318536 | Fbxl6     | F-box and leucine-rich repeat protein 6                                         | 14.65712 | 17.5634  | 19.78973 | 17.89035 | 18.81889 | 17.33805 |
| 17316179 | Fbxl7     | F-box and leucine-rich repeat protein 7                                         | 11.76297 | 10.97196 | 12.33298 | 11.2481  | 8.818052 | 12.07281 |
| 17504682 | Fbxl8     | F-box and leucine-rich repeat protein 8                                         | 9.571666 | 8.617504 | 9.60716  | 10.2129  | 7.337761 | 10.89421 |
| 17250790 | Fbxw10    | F-box and WD-40 domain protein 10                                               | 5.338965 | 4.929495 | 5.338965 | 5.933527 | 4.468281 | 6.447054 |
| 17248331 | Fbxw11    | F-box and WD-40 domain protein 11                                               | 57.81733 | 53.16113 | 53.80208 | 53.16113 | 52.06962 | 52.04039 |
| 17531302 | Fbxw13    | F-box and WD-40 domain protein 13                                               | 4.118389 | 3.417118 | 2.899411 | 3.686623 | 4.771259 | 3.437167 |
| 17531327 | Fbxw14    | F-box and WD-40 domain protein 14                                               | 3.790741 | 3.175052 | 2.255364 | 2.980284 | 2.482322 | 3.339703 |
| 17531405 | Fbxw15    | F-box and WD-40 domain protein 15                                               | 3.20095  | 2.950153 | 2.90108  | 3.086753 | 3.069301 | 3.204191 |
| 17531370 | Fbxw16    | F-box and WD-40 domain protein 16                                               | 3.118106 | 2.822884 | 2.827976 | 2.804299 | 3.263862 | 3.703245 |
| 17287260 | Fbxw17    | F-box and WD-40 domain protein 17                                               | 5.701533 | 6.198203 | 6.479983 | 6.119951 | 6.742577 | 6.158931 |
| 17531442 | Fbxw18    | F-box and WD-40 domain protein 18                                               | 3.107426 | 2.541817 | 3.061269 | 2.304206 | 2.407173 | 2.844253 |
| 17531383 | Fbxw19    | F-box and WD-40 domain protein 19                                               | 2.673464 | 3.703322 | 3.436071 | 2.826154 | 2.477371 | 3.333136 |
| 17384301 | Fbxw2     | F-box and WD-40 domain protein 2                                                | 46.26855 | 44.12609 | 42.56395 | 44.18608 | 44.59531 | 46.82802 |
| 17531315 | Fbxw20    | F-box and WD-40 domain protein 20                                               | 3.406075 | 4.794798 | 4.394168 | 3.104756 | 3.3867   | 3.765627 |
| 17531288 | Fbxw21    | F-box and WD-40 domain protein 21                                               | 2.622895 | 2.02525  | 2.458673 | 2.458673 | 2.458673 | 2.033127 |
| 17531357 | Fbxw22    | F-box and WD-40 domain protein 22                                               | 4.289799 | 2.373441 | 2.187966 | 2.45015  | 2.753945 | 2.480378 |
| 17531395 | Fbxw23    | F-box and WD-40 domain protein 23                                               | 3.769335 | 3.527827 | 3.222231 | 3.703322 | 3.466741 | 2.921785 |
| 17531418 | Fbxw24    | F-box and WD-40 domain protein 24                                               | 2.468526 | 2.965386 | 2.492166 | 1.934942 | 2.787651 | 1.93584  |
| 17531431 | Fbxw25    | F-box and WD-40 domain protein 25                                               | 2.411733 | 2.288116 | 2.542821 | 2.288116 | 2.638815 | 2.70534  |
| 17531455 | Fbxw26    | F-box and WD-40 domain protein 26                                               | 3.011683 | 2.49379  | 3.145218 | 2.879863 | 2.658219 | 3.256269 |
| 17531468 | Fbxw27    | F-box and WD-40 domain protein 27                                               | 2.406006 | 2.415229 | 2.625842 | 3.118517 | 3.028325 | 3.346539 |
| 17531342 | Fbxw28    | F-box and WD-40 domain protein 28                                               | 2.350259 | 1.837698 | 2.255442 | 1.688849 | 4.27979  | 2.193584 |
| 17365211 | Fbxw4     | F-box and WD-40 domain protein 4                                                | 27.40809 | 23.88859 | 26.04311 | 33.26654 | 28.84161 | 28.93172 |
| 17368079 | Fbxw5     | F-box and WD-40 domain protein 5                                                | 112.7138 | 112.061  | 127.0885 | 103.1614 | 87.33875 | 83.83728 |
| 17398581 | Fbxw7     | F-box and WD-40 domain protein 7                                                | 17.57801 | 17.41779 | 17.53651 | 18.48381 | 17.4687  | 14.43241 |
| 17451886 | Fbxw8     | F-box and WD-40 domain protein 8                                                | 59.45969 | 53.6825  | 57.39885 | 53.77859 | 47.49389 | 49.75329 |
| 17503362 | Fbxw9     | F-box and WD-40 domain protein 9                                                | 22.77044 | 22.15346 | 18.37586 | 22.17958 | 22.84062 | 22.3142  |
| 17424913 | Fbxo10    | F-box protein 10                                                                | 6.294798 | 6.40292  | 6.860435 | 9.608891 | 7.262771 | 7.103697 |
| 17347953 | Fbxo11    | F-box protein 11                                                                | 82.44214 | 83.46156 | 72.33791 | 83.16416 | 84.08287 | 92.0037  |
| 17352241 | Fbxo15    | F-box protein 15                                                                | 2.890221 | 2.998249 | 3.409287 | 3.395914 | 3.107426 | 3.044826 |
| 17301365 | Fbxo16    | F-box protein 16                                                                | 3.915808 | 4.464411 | 3.777103 | 4.040685 | 4.405605 | 3.787905 |
| 17475886 | Fbxo17    | F-box protein 17                                                                | 6.270846 | 6.659713 | 6.722044 | 7.554467 | 6.193865 | 7.068137 |
| 17381683 | Fbxo18    | F-box protein 18                                                                | 37.93191 | 33.69494 | 36.90642 | 38.17245 | 41.12033 | 36.99914 |
| 17421588 | Fbxo2     | F-box protein 2                                                                 | 6.682093 | 7.605589 | 6.631384 | 8.530557 | 7.425406 | 7.019508 |
| 17441490 | Fbxo21    | F-box protein 21                                                                | 149.0311 | 190.4528 | 145.0051 | 176.7063 | 145.0282 | 203.8946 |
| 17517500 | Fbxo22    | F-box protein 22                                                                | 60.54433 | 57.28716 | 54.37306 | 55.02785 | 59.24781 | 44.79668 |
| 17454099 | Fbxo24    | F-box protein 24                                                                | 4.573441 | 3.963157 | 3.500255 | 3.167973 | 2.976981 | 3.549117 |
| 17499396 | Fbxo25    | F-box protein 25                                                                | 26.62519 | 23.89588 | 25.17727 | 23.11825 | 23.56118 | 23.48178 |
| 17475874 | Fbxo27    | F-box protein 27                                                                | 7.724706 | 6.992896 | 7.031634 | 6.861433 | 6.929878 | 7.129545 |
| 17230602 | Fbxo28    | F-box protein 28                                                                | 33.03263 | 30.66498 | 29.70348 | 29.70348 | 30.66328 | 26.09986 |
| 17373794 | Fbxo3     | F-box protein 3                                                                 | 197.273  | 209.4178 | 194.7771 | 210.5399 | 178.4208 | 194.7771 |
| 17231662 | Fbxo30    | F-box protein 30                                                                | 27.49448 | 39.08004 | 27.49448 | 29.22781 | 27.49448 | 27.49448 |
| 17513590 | Fbxo31    | F-box protein 31                                                                | 61.88981 | 62.36566 | 74.76079 | 77.59383 | 77.90262 | 77.69124 |
| 17317266 | Fbxo32    | F-box protein 32                                                                | 12.32572 | 10.06629 | 13.29618 | 15.7794  | 13.29618 | 15.43764 |
| 17281388 | Fbxo33    | F-box protein 33                                                                | 27.75951 | 16.14986 | 16.13946 | 19.33255 | 14.31296 | 17.02508 |

|          |           |                                                                             |          |          |          |          |          |          |
|----------|-----------|-----------------------------------------------------------------------------|----------|----------|----------|----------|----------|----------|
| 17299341 | Fbxo34    | F-box protein 34                                                            | 28.74063 | 33.09199 | 33.12411 | 32.29435 | 32.29435 | 32.29435 |
| 17214883 | Fbxo36    | F-box protein 36                                                            | 29.12366 | 29.96113 | 29.57672 | 30.14131 | 33.01913 | 25.18268 |
| 17354861 | Fbxo38    | F-box protein 38                                                            | 72.21767 | 57.67203 | 54.69814 | 57.45976 | 60.3056  | 55.61607 |
| 17252351 | Fbxo39    | F-box protein 39                                                            | 3.84723  | 3.203769 | 3.923306 | 3.684452 | 3.729055 | 3.729055 |
| 17315658 | Fbxo4     | F-box protein 4                                                             | 20.48946 | 20.31706 | 22.97511 | 21.29481 | 23.09694 | 16.8077  |
| 17330264 | Fbxo40    | F-box protein 40                                                            | 9.812699 | 8.286311 | 7.791656 | 10.41665 | 9.123011 | 8.256384 |
| 17468387 | Fbxo41    | F-box protein 41                                                            | 7.582744 | 7.066227 | 6.26624  | 6.992896 | 7.042414 | 6.347815 |
| 17420984 | Fbxo42    | F-box protein 42                                                            | 34.08961 | 34.08961 | 37.05766 | 33.43182 | 36.53608 | 35.69401 |
| 17316472 | Fbxo43    | F-box protein 43                                                            | 4.364844 | 5.198192 | 5.470035 | 5.129577 | 4.352065 | 5.122649 |
| 17432927 | Fbxo44    | F-box protein 44                                                            | 11.24366 | 12.43582 | 12.97264 | 12.43582 | 11.38261 | 12.43582 |
| 17329833 | Fbxo45    | F-box protein 45                                                            | 21.49352 | 25.37243 | 23.15802 | 26.97891 | 20.92245 | 23.62529 |
| 17474485 | Fbxo46    | F-box protein 46                                                            | 12.18023 | 12.69906 | 12.69396 | 17.94488 | 18.48791 | 15.2999  |
| 17268647 | Fbxo47    | F-box protein 47                                                            | 4.12948  | 4.594284 | 4.627073 | 4.993911 | 3.919012 | 4.801449 |
| 17247428 | Fbxo48    | F-box protein 48                                                            | 5.276642 | 4.018592 | 3.767271 | 3.957941 | 3.796132 | 3.878288 |
| 17238974 | Fbxo5     | F-box protein 5                                                             | 7.776926 | 9.182646 | 9.791026 | 8.850629 | 7.685345 | 12.28529 |
| 17432912 | Fbxo6     | F-box protein 6                                                             | 66.94665 | 62.79379 | 70.9962  | 76.31263 | 76.81893 | 72.43575 |
| 17236155 | Fbxo7     | F-box protein 7                                                             | 28.68968 | 22.50681 | 16.34526 | 23.44503 | 22.48966 | 22.61675 |
| 17501260 | Fbxo8     | F-box protein 8                                                             | 190.1785 | 201.1503 | 157.6947 | 194.4991 | 181.2139 | 181.0244 |
| 17528983 | Fbxo9     | f-box protein 9                                                             | 66.24961 | 66.94572 | 65.86591 | 68.95915 | 68.53457 | 62.58175 |
| 17475734 | Fcgbp     | Fc fragment of IgG binding protein                                          | 6.288038 | 8.458313 | 7.965804 | 7.759319 | 9.355988 | 7.240002 |
| 17216976 | Fcmr      | Fc fragment of IgM receptor                                                 | 5.881279 | 5.667255 | 6.075992 | 7.207655 | 4.6943   | 5.532187 |
| 17216949 | Fcamr     | Fc receptor, IgA, IgM, high affinity                                        | 5.248008 | 4.459834 | 4.316045 | 7.183017 | 5.818188 | 5.373716 |
| 17229974 | Fcer1a    | Fc receptor, IgE, high affinity I, alpha polypeptide                        | 3.320315 | 2.738508 | 2.443485 | 2.3715   | 2.236651 | 1.939776 |
| 17229658 | Fcer1g    | Fc receptor, IgE, high affinity I, gamma polypeptide                        | 64.30326 | 95.47162 | 106.7417 | 68.07013 | 69.40078 | 62.87306 |
| 17570131 | Fcer2a    | Fc receptor, IgE, low affinity II, alpha polypeptide                        | 4.721974 | 4.064647 | 4.783578 | 4.506165 | 4.716969 | 5.573525 |
| 17490589 | Fcgrt     | Fc receptor, IgG, alpha chain transporter                                   | 493.067  | 515.0826 | 480.7223 | 418.6324 | 429.6059 | 402.7302 |
| 17408024 | Fcgr1     | Fc receptor, IgG, high affinity I                                           | 40.99    | 38.64233 | 50.97861 | 33.88254 | 41.68019 | 32.8404  |
| 17229607 | Fcgr2b    | Fc receptor, IgG, low affinity IIb                                          | 148.8391 | 141.1094 | 183.6481 | 129.9552 | 104.0974 | 90.9417  |
| 17229620 | Fcgr3     | Fc receptor, IgG, low affinity III                                          | 14.1029  | 25.98127 | 27.34964 | 20.58184 | 21.84937 | 24.307   |
| 17219199 | Fcgr4     | Fc receptor, IgG, low affinity IV                                           | 18.45743 | 18.8099  | 21.33707 | 18.36797 | 16.53682 | 15.48082 |
| 17398742 | Fcrl1     | Fc receptor-like 1                                                          | 4.518707 | 5.367722 | 4.57062  | 4.742442 | 5.023281 | 4.173073 |
| 17398755 | Fcrl5     | Fc receptor-like 5                                                          | 4.553197 | 5.914393 | 5.642052 | 5.463782 | 5.918904 | 6.860387 |
| 17229939 | Fcrl6     | Fc receptor-like 6                                                          | 4.097943 | 4.678156 | 4.365691 | 4.20927  | 4.113111 | 4.53006  |
| 17229596 | Fcrla     | Fc receptor-like A                                                          | 5.1425   | 5.117113 | 4.050332 | 4.066281 | 6.300341 | 3.83836  |
| 17229590 | Fcrlb     | Fc receptor-like B                                                          | 4.801117 | 5.05398  | 4.553008 | 5.004618 | 5.772075 | 5.303188 |
| 17406514 | Fcrls     | Fc receptor-like S, scavenger receptor                                      | 5.36285  | 5.052509 | 4.613814 | 5.36285  | 7.406439 | 5.563528 |
| 17277307 | Fcf1      | FCF1 small subunit (SSU) processome component homolog (S. cerevisiae)       | 27.31213 | 29.32359 | 23.46356 | 28.38369 | 28.05994 | 30.44978 |
| 17353857 | Fchsd1    | FCH and double SH3 domains 1                                                | 9.79829  | 9.79829  | 9.79829  | 11.74977 | 11.14883 | 10.05471 |
| 17480788 | Fchsd2    | FCH and double SH3 domains 2                                                | 48.2956  | 43.72511 | 51.86035 | 50.1612  | 32.53995 | 46.75861 |
| 17510428 | Fcho1     | FCH domain only 1                                                           | 6.201039 | 7.118583 | 7.076225 | 7.033438 | 7.118583 | 6.841298 |
| 17295394 | Fcho2     | FCH domain only 2                                                           | 60.62496 | 66.734   | 66.65725 | 64.90735 | 60.29849 | 66.00256 |
| 17492575 | Fes       | feline sarcoma oncogene                                                     | 12.05634 | 14.75539 | 14.62962 | 13.51388 | 16.23066 | 16.48589 |
| 17354263 | Fem1c     | fem-1 homolog c (C.elegans)                                                 | 45.50332 | 42.4561  | 39.58577 | 48.64366 | 45.70595 | 58.35846 |
| 17338743 | Fem1a     | feminization 1 homolog a (C. elegans)                                       | 24.21115 | 14.31653 | 17.13626 | 22.14317 | 18.70329 | 13.66459 |
| 17528014 | Fem1b     | feminization 1 homolog b (C. elegans)                                       | 41.06849 | 38.04988 | 34.74997 | 34.74997 | 34.74997 | 42.9793  |
| 17339081 | Fer       | fer (fms/fps related) protein kinase                                        | 25.58808 | 32.67375 | 30.06098 | 32.87799 | 28.57972 | 28.96121 |
| 17393407 | Fer14     | fer-1-like 4 (C. elegans)                                                   | 5.649997 | 5.780603 | 5.780603 | 6.513577 | 5.691425 | 5.780603 |
| 17211809 | Fer115    | fer-1-like 5 (C. elegans)                                                   | 5.894502 | 5.300432 | 5.259297 | 5.866947 | 5.518553 | 4.107384 |
| 17311733 | Fer116    | fer-1-like 6 (C. elegans)                                                   | 3.604477 | 3.263862 | 3.263862 | 3.167929 | 3.263862 | 3.502366 |
| 17274955 | Ferd3l    | Fer3-like (Drosophila)                                                      | 3.417497 | 3.54506  | 3.46333  | 3.517718 | 3.322939 | 3.258843 |
| 17413615 | Fermpd1   | FERM and PDZ domain containing 1                                            | 5.570551 | 6.171709 | 6.325108 | 7.332626 | 5.756133 | 6.171709 |
| 17424933 | Fermpd1os | FERM and PDZ domain containing 1, opposite strand                           | 4.762668 | 6.046164 | 3.451157 | 3.554188 | 4.040881 | 3.651148 |
| 17538152 | Fermpd3   | FERM and PDZ domain containing 3                                            | 3.680674 | 4.349531 | 4.334784 | 4.226988 | 3.376737 | 4.854827 |
| 17546133 | Fermpd4   | FERM and PDZ domain containing 4                                            | 3.594298 | 3.550962 | 4.046094 | 3.473813 | 3.825133 | 3.910139 |
| 17414913 | Fermd3    | FERM domain containing 3                                                    | 2.841751 | 3.129127 | 2.902005 | 3.303694 | 3.130927 | 3.147486 |
| 17366451 | Fermd4a   | FERM domain containing 4A                                                   | 18.58053 | 19.87179 | 26.15981 | 19.4185  | 19.24711 | 20.71279 |
| 17469365 | Fermd4b   | FERM domain containing 4B                                                   | 53.48862 | 48.0292  | 68.43678 | 53.17403 | 65.92437 | 61.72059 |
| 17390637 | Fermd5    | FERM domain containing 5                                                    | 27.56546 | 21.82198 | 20.17784 | 38.68118 | 11.23135 | 15.75939 |
| 17276020 | Fermd6    | FERM domain containing 6                                                    | 15.11239 | 21.09487 | 19.03615 | 18.25551 | 16.26839 | 16.99914 |
| 17541597 | Fermd7    | FERM domain containing 7                                                    | 4.653512 | 3.808651 | 4.045281 | 3.731382 | 3.94422  | 3.489112 |
| 17361814 | Fermd8    | FERM domain containing 8                                                    | 33.49445 | 36.29729 | 33.49445 | 34.4595  | 29.69751 | 30.49054 |
| 17356559 | Fermd8os  | FERM domain containing 8, opposite strand                                   | 7.225313 | 8.00971  | 9.225135 | 8.320787 | 7.828902 | 9.702591 |
| 17302802 | Farp1     | FERM, RhoGEF (Arhgef) and pleckstrin domain protein 1 (chondrocyte-derived) | 50.62682 | 34.8948  | 41.10494 | 40.41615 | 41.19108 | 28.26785 |
| 17216031 | Farp2     | FERM, RhoGEF and pleckstrin domain protein 2                                | 51.82765 | 39.83929 | 41.26624 | 45.34244 | 37.94427 | 37.32163 |
| 17392056 | Fermt1    | fermitin family homolog 1 (Drosophila)                                      | 5.751467 | 5.518515 | 6.499866 | 5.490928 | 4.407682 | 5.490928 |
| 17305662 | Fermt2    | fermitin family homolog 2 (Drosophila)                                      | 168.938  | 102.4829 | 97.64539 | 106.6219 | 102.4829 | 126.4734 |
| 17362223 | Fermt3    | fermitin family homolog 3 (Drosophila)                                      | 10.96178 | 20.54877 | 21.20173 | 11.11303 | 15.54167 | 16.65311 |
| 17527004 | Fdx1      | ferredoxin 1                                                                | 56.26438 | 55.24914 | 50.99133 | 67.58494 | 58.56432 | 68.18961 |
| 17524597 | Fdx1l     | ferredoxin 1-like                                                           | 44.3444  | 43.4574  | 42.55657 | 40.10082 | 43.5373  | 38.46195 |
| 17271823 | Fdxr      | ferredoxin reductase                                                        | 24.39629 | 24.66443 | 23.05248 | 26.72707 | 26.6407  | 25.80216 |
| 17517142 | Fdxacb1   | ferredoxin-fold anticodon binding domain containing 1                       | 10.15938 | 9.882733 | 8.85959  | 9.624089 | 11.11904 | 9.442376 |
| 17402072 | Frrs1     | ferric-chelate reductase 1                                                  | 92.26042 | 90.22779 | 93.13877 | 82.03286 | 76.29148 | 66.25053 |
| 17425525 | Frrs1l    | ferric-chelate reductase 1 like                                             | 3.136814 | 3.879633 | 3.289709 | 4.379238 | 4.942291 | 3.729055 |
| 17357418 | Fth1      | ferritin heavy polypeptide 1                                                | 3223.473 | 3352.427 | 3448.588 | 3147.346 | 3015.351 | 3168.886 |
| 17490830 | Ftl1      | ferritin light polypeptide 1                                                | 33.82786 | 47.05317 | 34.58897 | 31.62492 | 17.56997 | 22.66886 |
| 17350559 | Ftmt      | ferritin mitochondrial                                                      | 7.340356 | 10.20539 | 9.369876 | 8.342733 | 8.342733 | 9.416102 |
| 17536165 | Fthl17a   | ferritin, heavy polypeptide-like 17, member A                               | 5.742146 | 8.448118 | 11.80258 | 9.269426 | 9.603897 | 8.789554 |
| 17540136 | Fthl17b   | ferritin, heavy polypeptide-like 17, member B                               | 7.901847 | 7.698994 | 6.358516 | 6.251403 | 7.254167 | 7.698994 |
| 17540140 | Fthl17c   | ferritin, heavy polypeptide-like 17, member C                               | 4.505696 | 5.924527 | 5.697622 | 4.340978 | 4.918574 | 5.206847 |
| 17540144 | Fthl17d   | ferritin, heavy polypeptide-like 17, member D                               | 4.227105 | 5.760604 | 5.215661 | 4.635388 | 6.322346 | 4.20927  |
| 17533187 | Fthl17e   | ferritin, heavy polypeptide-like 17, member E                               | 3.626254 | 4.20927  | 3.735419 | 3.347467 | 6.279632 | 4.42826  |
| 17533191 | Fthl17f   | ferritin, heavy polypeptide-like 17, member F                               | 17.98223 | 19.82364 | 20.35921 | 16.50441 | 13.96555 | 20.43811 |
| 17354995 | Fech      | ferrochelatase                                                              | 234.0625 | 220.432  | 205.209  | 191.1154 | 172.6552 | 201.9298 |
| 17535395 | Fate1     | fetal and adult testis expressed 1                                          | 3.508635 | 3.770981 | 4.042674 | 4.34914  | 4.739648 | 3.664992 |

|          |          |                                                                 |          |          |          |          |          |          |
|----------|----------|-----------------------------------------------------------------|----------|----------|----------|----------|----------|----------|
| 17324332 | Fetub    | fetuin beta                                                     | 785.5558 | 886.5573 | 884.869  | 782.7946 | 1224.477 | 790.8882 |
| 17224379 | Fev      | FEV (ETS oncogene family)                                       | 5.902393 | 6.71734  | 7.149042 | 6.233878 | 5.951074 | 6.622106 |
| 17465108 | Fezf1    | Fez family zinc finger 1                                        | 4.600912 | 4.69082  | 5.258459 | 4.200555 | 5.510908 | 4.801649 |
| 17303496 | Fezf2    | Fez family zinc finger 2                                        | 3.062691 | 3.935754 | 2.862469 | 3.107146 | 3.958544 | 2.930466 |
| 17333050 | Fgfr1op  | Fgfr1 oncogene partner                                          | 12.48176 | 13.24137 | 11.9218  | 12.79342 | 12.60295 | 10.36645 |
| 17464291 | Fgfr1op2 | FGFR1 oncogene partner 2                                        | 64.29078 | 64.68234 | 62.87044 | 64.00177 | 63.19507 | 66.57506 |
| 17328411 | Fopnl    | Fgfr1op N-terminal like                                         | 47.6981  | 46.80173 | 37.89433 | 47.88859 | 46.60943 | 46.8946  |
| 17415544 | Fggy     | FGGY carbohydrate kinase domain containing                      | 133.2221 | 136.5608 | 141.5541 | 146.61   | 126.7744 | 143.799  |
| 17406363 | Fhdc1    | FH2 domain containing 1                                         | 5.338965 | 6.467015 | 6.903414 | 5.244117 | 4.985333 | 5.665134 |
| 17475777 | Fbl      | fibrillarin                                                     | 65.61847 | 55.3937  | 71.11638 | 66.82102 | 71.38703 | 57.47609 |
| 17261726 | Fbll1    | fibrillarin-like 1                                              | 8.834815 | 8.542924 | 6.852071 | 8.84652  | 8.362069 | 8.834815 |
| 17390879 | Fbn1     | fibrillin 1                                                     | 11.69768 | 14.71066 | 13.67131 | 11.69768 | 10.23763 | 11.31394 |
| 17354513 | Fbn2     | fibrillin 2                                                     | 4.133432 | 4.133432 | 4.295095 | 4.715138 | 4.779402 | 3.980749 |
| 17398499 | Fga      | fibrinogen alpha chain                                          | 1960.37  | 1667.141 | 1668.366 | 1562.976 | 2065.507 | 1548.998 |
| 17406252 | Fgb      | fibrinogen beta chain                                           | 3689.757 | 3458.738 | 3288.423 | 3044.585 | 3963.117 | 3136.761 |
| 17383798 | Fibcd1   | fibrinogen C domain containing 1                                | 10.29855 | 13.54905 | 10.98589 | 12.62289 | 6.747766 | 10.29855 |
| 17398485 | Fgg      | fibrinogen gamma chain                                          | 3547.409 | 3220.971 | 3023.974 | 2835.878 | 3688.632 | 2852.715 |
| 17508938 | Fgl1     | fibrinogen-like protein 1                                       | 1188.1   | 1558.973 | 1659.025 | 1016.215 | 1800.772 | 1049.925 |
| 17435089 | Fgl2     | fibrinogen-like protein 2                                       | 26.05467 | 27.16166 | 31.2976  | 29.27262 | 26.80555 | 25.84476 |
| 17385767 | Fap      | fibroblast activation protein                                   | 5.142287 | 5.020392 | 5.271633 | 6.993671 | 5.378038 | 5.503312 |
| 17356434 | Fibp     | fibroblast growth factor (acidic) intracellular binding protein | 25.98343 | 34.25565 | 32.86591 | 29.89723 | 37.65423 | 35.86811 |
| 17353962 | Fgf1     | fibroblast growth factor 1                                      | 161.6893 | 163.6183 | 243.0029 | 187.325  | 181.9464 | 175.6561 |
| 17290111 | Fgf10    | fibroblast growth factor 10                                     | 3.662452 | 3.349138 | 3.215203 | 3.144368 | 3.189853 | 2.676041 |
| 17264960 | Fgf11    | fibroblast growth factor 11                                     | 7.76061  | 7.795059 | 7.770514 | 7.698994 | 7.35115  | 9.41545  |
| 17329516 | Fgf12    | fibroblast growth factor 12                                     | 7.182519 | 7.879368 | 6.0805   | 7.849659 | 6.030928 | 8.512483 |
| 17541926 | Fgf13    | fibroblast growth factor 13                                     | 5.761083 | 5.48933  | 5.48933  | 5.201256 | 5.172135 | 5.56106  |
| 17309774 | Fgf14    | fibroblast growth factor 14                                     | 5.531305 | 6.044823 | 4.829353 | 6.460295 | 6.491447 | 6.444373 |
| 17485443 | Fgf15    | fibroblast growth factor 15                                     | 7.698994 | 8.018876 | 9.788651 | 10.08186 | 5.899407 | 7.591421 |
| 17537038 | Fgf16    | fibroblast growth factor 16                                     | 7.023548 | 6.684177 | 6.992896 | 8.533633 | 5.754298 | 7.561487 |
| 17308435 | Fgf17    | fibroblast growth factor 17                                     | 19.31795 | 17.47826 | 15.26981 | 15.73887 | 15.50434 | 15.05541 |
| 17261542 | Fgf18    | fibroblast growth factor 18                                     | 13.80769 | 14.98918 | 14.34723 | 16.8197  | 14.31296 | 20.89607 |
| 17397129 | Fgf2     | fibroblast growth factor 2                                      | 5.423071 | 4.80105  | 4.699411 | 4.057469 | 5.177946 | 5.251392 |
| 17404906 | Fgf2os   | fibroblast growth factor 2, opposite strand                     | 2.742915 | 2.545131 | 2.742915 | 3.05508  | 2.777025 | 2.921501 |
| 17508861 | Fgf20    | fibroblast growth factor 20                                     | 6.436873 | 7.341017 | 7.321605 | 7.631835 | 5.918535 | 8.012875 |
| 17490899 | Fgf21    | fibroblast growth factor 21                                     | 66.56353 | 79.5511  | 110.4462 | 73.83229 | 29.41744 | 29.05592 |
| 17234948 | Fgf22    | fibroblast growth factor 22                                     | 37.69444 | 36.79531 | 39.75323 | 37.69444 | 35.63567 | 43.76331 |
| 17463338 | Fgf23    | fibroblast growth factor 23                                     | 4.709193 | 6.845472 | 41.80258 | 5.810612 | 6.044906 | 3.821503 |
| 17485430 | Fgf3     | fibroblast growth factor 3                                      | 3.666262 | 3.929294 | 5.106094 | 3.883372 | 4.212072 | 4.990969 |
| 17485437 | Fgf4     | fibroblast growth factor 4                                      | 6.855206 | 8.472983 | 7.719942 | 8.701777 | 7.570717 | 7.894621 |
| 17439517 | Fgf5     | fibroblast growth factor 5                                      | 4.58652  | 4.668471 | 4.61196  | 4.573821 | 5.158101 | 4.865304 |
| 17463332 | Fgf6     | fibroblast growth factor 6                                      | 9.892259 | 8.366128 | 9.172214 | 8.943441 | 12.48168 | 7.782049 |
| 17375685 | Fgf7     | fibroblast growth factor 7                                      | 4.765706 | 4.550736 | 4.779998 | 5.131107 | 4.511446 | 4.329949 |
| 17365233 | Fgf8     | fibroblast growth factor 8                                      | 9.123011 | 8.253294 | 9.123011 | 9.123011 | 10.13799 | 9.8752   |
| 17300950 | Fgf9     | fibroblast growth factor 9                                      | 4.293339 | 4.447948 | 4.574233 | 5.295768 | 4.062027 | 4.824736 |
| 17447831 | Fgfbp1   | fibroblast growth factor binding protein 1                      | 2.96987  | 2.811363 | 3.498169 | 3.208235 | 4.069129 | 3.260244 |
| 17364213 | Fgfbp3   | fibroblast growth factor binding protein 3                      | 13.57293 | 19.08265 | 19.32491 | 16.92589 | 13.20736 | 21.12882 |
| 17500108 | Fgfr1    | fibroblast growth factor receptor 1                             | 17.20576 | 22.46193 | 22.45804 | 22.72755 | 25.52484 | 10.48911 |
| 17496947 | Fgfr2    | fibroblast growth factor receptor 2                             | 67.34458 | 55.62803 | 49.23492 | 53.99336 | 56.7654  | 53.44785 |
| 17436481 | Fgfr3    | fibroblast growth factor receptor 3                             | 16.41667 | 17.68188 | 15.14374 | 14.11268 | 16.421   | 10.53896 |
| 17287590 | Fgfr4    | fibroblast growth factor receptor 4                             | 45.88466 | 34.2699  | 31.49607 | 33.30623 | 42.06738 | 30.79107 |
| 17245188 | Frs2     | fibroblast growth factor receptor substrate 2                   | 57.16103 | 51.47964 | 55.39216 | 60.01329 | 44.33672 | 56.61294 |
| 17338305 | Frs3     | fibroblast growth factor receptor substrate 3                   | 6.69967  | 7.740678 | 9.235884 | 7.605431 | 6.198676 | 9.49396  |
| 17345722 | Frs3os   | fibroblast growth factor receptor substrate 3, opposite strand  | 9.673514 | 5.89393  | 10.01659 | 7.718658 | 7.65934  | 11.79154 |
| 17440312 | Fgfrl1   | fibroblast growth factor receptor-like 1                        | 36.87932 | 31.22934 | 31.49607 | 32.8773  | 31.54589 | 28.87562 |
| 17217373 | Fmod     | fibromodulin                                                    | 10.68726 | 12.08462 | 10.24019 | 10.24019 | 11.56746 | 9.188631 |
| 17224071 | Fn1      | fibronectin 1                                                   | 1812.029 | 1943.485 | 2039.189 | 1569.327 | 2077.237 | 1605.214 |
| 17362256 | Flrt1    | fibronectin leucine rich transmembrane protein 1                | 10.52764 | 11.50086 | 14.36394 | 10.05046 | 9.938444 | 9.04738  |
| 17277788 | Flrt2    | fibronectin leucine rich transmembrane protein 2                | 5.498812 | 5.768835 | 3.830944 | 5.30396  | 3.732701 | 6.685104 |
| 17392255 | Flrt3    | fibronectin leucine rich transmembrane protein 3                | 2.67402  | 2.67402  | 2.67402  | 2.67402  | 2.732554 | 2.512459 |
| 17484151 | Fank1    | fibronectin type 3 and ankyrin repeat domains 1                 | 3.679654 | 3.310915 | 3.863183 | 4.092578 | 4.127562 | 3.915645 |
| 17338670 | Fsd1     | fibronectin type 3 and SPRY domain-containing protein           | 4.112883 | 5.056783 | 5.015383 | 4.908833 | 5.056363 | 4.233673 |
| 17414212 | Fsd1l    | fibronectin type III and SPRY domain containing 1-like          | 3.381516 | 2.735643 | 2.980615 | 2.545907 | 3.819543 | 3.678073 |
| 17492810 | Fsd2     | fibronectin type III and SPRY domain containing 2               | 3.980639 | 5.386134 | 5.386134 | 5.386134 | 6.6352   | 5.890867 |
| 17340673 | Fndc1    | fibronectin type III domain containing 1                        | 10.42677 | 8.15226  | 6.779975 | 7.551221 | 5.624676 | 8.878402 |
| 17308525 | Fndc3a   | fibronectin type III domain containing 3A                       | 213.2615 | 158.7508 | 164.1476 | 145.0624 | 167.3889 | 158.4946 |
| 17404432 | Fndc3b   | fibronectin type III domain containing 3B                       | 97.26777 | 80.63811 | 105.0243 | 71.88406 | 100.1897 | 46.79784 |
| 17544025 | Fndc3c1  | fibronectin type III domain containing 3C1                      | 3.134032 | 2.985722 | 2.940517 | 2.394526 | 3.471213 | 3.437858 |
| 17544002 | Fndc3c2  | fibronectin type III domain containing 3C2                      | 2.596305 | 3.523819 | 3.260312 | 3.603528 | 4.351944 | 3.245318 |
| 17446981 | Fndc4    | fibronectin type III domain containing 4                        | 46.08387 | 34.28344 | 40.00698 | 53.25703 | 44.58603 | 46.54002 |
| 17418945 | Fndc5    | fibronectin type III domain containing 5                        | 15.16854 | 14.00257 | 16.83206 | 14.5022  | 12.35035 | 15.91439 |
| 17409428 | Fndc7    | fibronectin type III domain containing 7                        | 3.729055 | 3.870929 | 3.729055 | 3.729055 | 4.482551 | 3.697474 |
| 17254121 | Fndc8    | fibronectin type III domain containing 8                        | 3.28841  | 4.061098 | 3.6769   | 2.943372 | 4.637766 | 3.683073 |
| 17248786 | Fndc9    | fibronectin type III domain containing 9                        | 4.081105 | 5.361104 | 5.623039 | 5.303887 | 5.712372 | 5.806585 |
| 17483325 | Fbrs     | fibrosin                                                        | 39.68797 | 58.91855 | 63.62404 | 47.14654 | 46.00153 | 46.81795 |
| 17451020 | Fbrsl1   | fibrosin-like 1                                                 | 35.90319 | 41.64121 | 42.50203 | 36.93457 | 37.49432 | 42.43227 |
| 17281408 | Fscb     | fibrous sheath CABYR binding protein                            | 2.313729 | 2.030943 | 2.390065 | 2.107321 | 2.591648 | 2.446315 |
| 17389689 | Fsip1    | fibrous sheath-interacting protein 1                            | 8.215111 | 6.316258 | 5.365081 | 6.043608 | 6.334585 | 6.043608 |
| 17372470 | Fsip2    | fibrous sheath-interacting protein 2                            | 2.568026 | 2.67402  | 2.659693 | 2.533339 | 2.845594 | 2.583094 |
| 17313811 | Fbuln1   | fibulin 1                                                       | 11.92072 | 9.975437 | 11.71398 | 8.482444 | 9.532536 | 8.880187 |
| 17460891 | Fbuln2   | fibulin 2                                                       | 13.10931 | 15.92631 | 17.27322 | 14.67847 | 16.95102 | 16.28001 |
| 17283380 | Fbuln5   | fibulin 5                                                       | 18.65784 | 24.10132 | 22.26028 | 20.2162  | 22.68206 | 23.4979  |
| 17376051 | Fbuln7   | fibulin 7                                                       | 21.04536 | 16.12402 | 20.32721 | 18.09827 | 16.47047 | 19.3477  |
| 17440748 | Ficd     | FIC domain containing                                           | 21.42465 | 11.707   | 10.22643 | 11.52896 | 12.55282 | 11.90322 |
| 17382737 | Fcna     | ficolin A                                                       | 92.37817 | 108.3481 | 137.7606 | 93.74436 | 70.95242 | 70.46476 |

|          |              |                                                                                    |          |          |          |          |          |          |
|----------|--------------|------------------------------------------------------------------------------------|----------|----------|----------|----------|----------|----------|
| 17383353 | Fcnb         | ficolin B                                                                          | 3.536298 | 4.294976 | 5.076485 | 4.138936 | 3.610904 | 3.774172 |
| 17385840 | Fign         | fidgetin                                                                           | 5.212047 | 6.318535 | 7.322519 | 4.522906 | 4.453501 | 6.602855 |
| 17260633 | Fignl1       | fidgetin-like 1                                                                    | 3.009972 | 2.85049  | 3.190008 | 2.619806 | 2.966805 | 3.206679 |
| 17321811 | Fignl2       | fidgetin-like 2                                                                    | 13.00685 | 11.86278 | 12.75932 | 17.09947 | 14.81062 | 14.37958 |
| 17240405 | Fig4         | FIG4 homolog (S. cerevisiae)                                                       | 35.69599 | 32.78786 | 28.48005 | 36.30836 | 25.65948 | 26.67987 |
| 17399952 | Flg          | filaggrin                                                                          | 7.558553 | 7.80398  | 5.515111 | 6.924021 | 5.433606 | 6.776921 |
| 17399940 | Flg2         | filaggrin family member 2                                                          | 3.234202 | 3.811714 | 3.234202 | 3.263862 | 2.834609 | 2.46048  |
| 17529185 | Filip1       | filamin A interacting protein 1                                                    | 5.051704 | 5.696754 | 5.19387  | 4.172697 | 4.825104 | 4.574582 |
| 17326394 | Filip1l      | filamin A interacting protein 1-like                                               | 7.271031 | 9.527251 | 7.852217 | 7.311665 | 7.985429 | 7.219355 |
| 17432227 | Fblim1       | filamin binding LIM protein 1                                                      | 9.034909 | 11.0551  | 14.16786 | 13.53929 | 9.203164 | 10.94015 |
| 17456627 | Flnc         | filamin C, gamma                                                                   | 7.076274 | 8.866963 | 10.11427 | 8.833713 | 8.109989 | 9.703263 |
| 17542588 | Flna         | filamin, alpha                                                                     | 28.45223 | 29.62986 | 30.64862 | 26.38343 | 27.5248  | 27.2084  |
| 17297010 | Flnb         | filamin, beta                                                                      | 120.3665 | 118.6403 | 142.0318 | 107.8244 | 98.71039 | 105.4474 |
| 17389157 | Fibin        | fin bud initiation factor homolog (zebrafish)                                      | 4.635227 | 4.271285 | 4.597501 | 4.615926 | 4.380362 | 4.53864  |
| 17331573 | Fau          | Finkel-Biskis-Reilly murine sarcoma virus (FBR-MuSV) ubiquitously expressed (fox c | 283.9317 | 303.4027 | 297.4782 | 291.4471 | 319.9605 | 323.3942 |
| 17356604 | Fau          | Finkel-Biskis-Reilly murine sarcoma virus (FBR-MuSV) ubiquitously expressed (fox c | 11.38743 | 14.03921 | 15.08246 | 14.15952 | 18.36567 | 16.48955 |
| 17438196 | Fip1l1       | FTP1 like 1 (S. cerevisiae)                                                        | 93.42392 | 80.55264 | 82.01751 | 86.94614 | 81.36125 | 82.01751 |
| 17443474 | Fis1         | fission 1 (mitochondrial outer membrane) homolog (yeast)                           | 25.94042 | 24.00528 | 23.8279  | 27.12535 | 26.07292 | 26.68228 |
| 17243312 | Fzr1         | fizzy/cell division cycle 20 related 1 (Drosophila)                                | 39.76949 | 35.12874 | 35.12874 | 30.40444 | 35.12874 | 44.0088  |
| 17256365 | Fkbp10       | FK506 binding protein 10                                                           | 16.18516 | 19.58775 | 19.3955  | 19.08226 | 17.01435 | 21.19233 |
| 17321318 | Fkbp11       | FK506 binding protein 11                                                           | 68.88796 | 47.12073 | 49.02515 | 43.20271 | 36.61721 | 29.33559 |
| 17466996 | Fkbp14       | FK506 binding protein 14                                                           | 12.29543 | 14.22217 | 12.95673 | 12.2127  | 10.28614 | 11.07788 |
| 17426126 | Fkbp15       | FK506 binding protein 15                                                           | 30.61804 | 38.71525 | 37.061   | 36.60731 | 41.60947 | 33.73888 |
| 17377597 | Fkbp1a       | FK506 binding protein 1a                                                           | 40.92584 | 49.02073 | 44.74765 | 40.77152 | 37.83711 | 37.27561 |
| 17279858 | Fkbp1b       | FK506 binding protein 1b                                                           | 3.757883 | 3.360346 | 3.323423 | 3.703656 | 3.009429 | 3.623792 |
| 17362190 | Fkbp2        | FK506 binding protein 2                                                            | 266.448  | 201.7339 | 186.8919 | 204.1096 | 233.9911 | 212.7256 |
| 17281419 | Fkbp3        | FK506 binding protein 3                                                            | 55.73957 | 59.21497 | 54.10762 | 61.76082 | 58.93203 | 65.30086 |
| 17471342 | Fkbp4        | FK506 binding protein 4                                                            | 214.9176 | 175.795  | 160.8631 | 182.1067 | 145.6993 | 193.5644 |
| 17342868 | Fkbp5        | FK506 binding protein 5                                                            | 19.42294 | 40.23642 | 41.56162 | 40.23642 | 52.79209 | 37.16287 |
| 17453545 | Fkbp6        | FK506 binding protein 6                                                            | 6.933386 | 6.957746 | 6.928437 | 6.894472 | 6.665024 | 8.151864 |
| 17386770 | Fkbp7        | FK506 binding protein 7                                                            | 9.01639  | 14.63357 | 10.97607 | 10.15628 | 10.08438 | 13.51191 |
| 17501950 | Fkbp8        | FK506 binding protein 8                                                            | 188.7339 | 185.6344 | 222.5136 | 185.83   | 186.8478 | 173.838  |
| 17458911 | Fkbp9        | FK506 binding protein 9                                                            | 59.4119  | 70.95931 | 74.68466 | 65.52756 | 53.82744 | 58.46171 |
| 17336655 | Fkbp1        | FK506 binding protein-like                                                         | 7.754104 | 9.40723  | 10.1025  | 9.73776  | 10.81349 | 10.81349 |
| 17362609 | Fen1         | flap structure specific endonuclease 1                                             | 8.850322 | 7.238898 | 4.845918 | 5.06422  | 6.992896 | 6.597777 |
| 17229020 | Fmo1         | flavin containing monooxygenase 1                                                  | 327.5497 | 374.3282 | 372.5138 | 403.6077 | 316.1335 | 312.8159 |
| 17229036 | Fmo2         | flavin containing monooxygenase 2                                                  | 30.84447 | 52.17801 | 75.98486 | 58.84549 | 90.06096 | 49.15138 |
| 17229059 | Fmo3         | flavin containing monooxygenase 3                                                  | 9.186912 | 16.41542 | 31.17246 | 16.96077 | 53.12798 | 18.7243  |
| 17229007 | Fmo4         | flavin containing monooxygenase 4                                                  | 14.06122 | 16.8857  | 18.12338 | 19.91633 | 19.12529 | 16.25712 |
| 17400773 | Fmo5         | flavin containing monooxygenase 5                                                  | 749.1236 | 763.1855 | 719.3051 | 796.6212 | 817.945  | 736.5298 |
| 17229050 | Fmo6         | flavin containing monooxygenase 6                                                  | 3.428553 | 3.113376 | 3.762209 | 4.277862 | 3.391116 | 4.385435 |
| 17229370 | Fmo9         | flavin containing monooxygenase 9                                                  | 4.446222 | 5.331901 | 4.524536 | 4.789915 | 4.257569 | 4.445113 |
| 17263609 | Flii         | flightless I homolog (Drosophila)                                                  | 94.16311 | 101.2852 | 103.9741 | 101.5411 | 96.28906 | 98.91655 |
| 17328222 | LOC105246072 | floculation protein FLO10-like                                                     | 4.421022 | 3.328472 | 3.420412 | 3.361768 | 3.757648 | 3.218749 |
| 17337232 | Flot1        | flotillin 1                                                                        | 41.87972 | 44.71912 | 50.779   | 42.61384 | 37.51537 | 32.38895 |
| 17253431 | Flot2        | flotillin 2                                                                        | 54.71635 | 56.24138 | 59.9343  | 49.69986 | 48.15154 | 53.45711 |
| 17485985 | Fiz1         | Flt3 interacting zinc finger protein 1                                             | 41.94044 | 39.41164 | 38.0193  | 38.84993 | 44.6742  | 47.50014 |
| 17341619 | Flywch2      | FLYWCH family member 2                                                             | 6.19232  | 4.845952 | 5.29933  | 5.010936 | 5.220435 | 4.312158 |
| 17341608 | Flywch1      | FLYWCH-type zinc finger 1                                                          | 33.8084  | 30.67306 | 30.27028 | 29.13275 | 27.19614 | 33.14203 |
| 17455346 | Flt1         | FMS-like tyrosine kinase 1                                                         | 26.46585 | 28.28372 | 48.1502  | 26.79181 | 26.22244 | 15.96311 |
| 17455319 | Flt3         | FMS-like tyrosine kinase 3                                                         | 5.558787 | 7.698994 | 5.701889 | 5.558787 | 4.578072 | 5.558787 |
| 17490628 | Flt3l        | FMS-like tyrosine kinase 3 ligand                                                  | 15.79176 | 24.03592 | 28.54607 | 21.18748 | 17.29664 | 17.90201 |
| 17248992 | Flt4         | FMS-like tyrosine kinase 4                                                         | 65.43769 | 66.49436 | 74.96992 | 60.84134 | 45.99643 | 45.85191 |
| 17415239 | Focad        | focadhesin                                                                         | 15.91891 | 14.31296 | 14.31296 | 15.90832 | 14.24131 | 14.13275 |
| 17493145 | Folh1        | folate hydrolase 1                                                                 | 3.912525 | 3.471069 | 3.653401 | 2.973393 | 3.145937 | 3.397868 |
| 17493956 | Folr1        | folate receptor 1 (adult)                                                          | 4.61065  | 5.481725 | 4.699411 | 4.886969 | 5.999491 | 5.212155 |
| 17493949 | Folr2        | folate receptor 2 (fetal)                                                          | 85.19696 | 95.96125 | 100.8201 | 82.6888  | 74.39532 | 69.006   |
| 17389105 | Fshb         | follicle stimulating hormone beta                                                  | 4.20927  | 4.360459 | 4.274839 | 4.941161 | 3.729055 | 4.332891 |
| 17348003 | Fshr         | follicle stimulating hormone receptor                                              | 3.128476 | 3.883991 | 3.907295 | 3.380859 | 3.380859 | 3.061948 |
| 17263463 | Flcn         | folliculin                                                                         | 33.82786 | 52.53912 | 43.24226 | 40.29447 | 35.89448 | 45.88053 |
| 17249702 | Fnip1        | folliculin interacting protein 1                                                   | 57.89633 | 68.40595 | 69.93923 | 59.26712 | 53.38306 | 68.40595 |
| 17406066 | Fnip2        | folliculin interacting protein 2                                                   | 33.92155 | 48.43809 | 52.96106 | 43.45349 | 61.69835 | 46.46524 |
| 17460360 | Figla        | folliculogenesis specific basic helix-loop-helix                                   | 5.291255 | 5.655286 | 4.915847 | 5.412631 | 4.931273 | 5.074586 |
| 17296344 | Fst          | follistatin                                                                        | 67.55029 | 53.33202 | 45.01956 | 44.09796 | 41.07789 | 33.84827 |
| 17325514 | Fstl1        | follistatin-like 1                                                                 | 18.49649 | 20.22854 | 24.18013 | 17.36523 | 14.74189 | 18.49649 |
| 17234955 | Fstl3        | follistatin-like 3                                                                 | 17.19062 | 19.36259 | 20.90056 | 21.17206 | 17.46555 | 19.00003 |
| 17249461 | Fstl4        | follistatin-like 4                                                                 | 7.742771 | 6.398838 | 7.097053 | 6.834094 | 6.992896 | 6.088345 |
| 17398338 | Fstl5        | follistatin-like 5                                                                 | 3.084849 | 2.88954  | 2.874239 | 3.058618 | 2.921137 | 2.950133 |
| 17383934 | Fpgs         | folylpolyglutamyl synthetase                                                       | 114.89   | 93.0994  | 104.3322 | 110.6968 | 111.6593 | 85.39324 |
| 17281337 | Foxa1        | forkhead box A1                                                                    | 56.79256 | 42.56778 | 49.4617  | 42.76771 | 35.88502 | 41.02723 |
| 17392561 | Foxa2        | forkhead box A2                                                                    | 61.67398 | 56.70956 | 70.26528 | 56.47028 | 62.32331 | 61.7848  |
| 17487149 | Foxa3        | forkhead box A3                                                                    | 70.53513 | 73.95932 | 60.95151 | 79.99955 | 110.3781 | 87.28065 |
| 17528557 | Foxb1        | forkhead box B1                                                                    | 6.44089  | 5.915213 | 5.914885 | 6.144859 | 5.101283 | 7.311108 |
| 17363316 | Foxb2        | forkhead box B2                                                                    | 6.413225 | 10.54816 | 10.46137 | 8.225139 | 7.749859 | 11.23727 |
| 17286340 | Foxc1        | forkhead box C1                                                                    | 4.826542 | 5.068082 | 6.663869 | 5.644164 | 5.04135  | 5.345556 |
| 17506296 | Foxc2        | forkhead box C2                                                                    | 6.894567 | 6.811346 | 5.619026 | 6.563567 | 7.936759 | 6.252833 |
| 17289422 | Foxd1        | forkhead box D1                                                                    | 5.030947 | 5.387702 | 4.392493 | 4.366508 | 4.315716 | 5.083316 |
| 17428424 | Foxd2        | forkhead box D2                                                                    | 5.802481 | 5.870446 | 5.736179 | 6.489062 | 6.740567 | 6.783736 |
| 17417107 | Foxd2os      | forkhead box D2, opposite strand                                                   | 3.703322 | 3.646317 | 3.703322 | 3.641064 | 3.895558 | 3.52729  |
| 17415774 | Foxd3        | forkhead box D3                                                                    | 20.50708 | 18.93784 | 15.57921 | 17.50846 | 17.96952 | 16.56596 |
| 17363640 | Foxd4        | forkhead box D4                                                                    | 4.112712 | 4.035311 | 3.81679  | 3.816156 | 4.992768 | 3.467702 |
| 17413817 | Foxe1        | forkhead box E1                                                                    | 11.96866 | 11.04055 | 12.33281 | 12.36243 | 10.82226 | 12.67892 |
| 17428427 | Foxe3        | forkhead box E3                                                                    | 12.69836 | 10.37119 | 9.530025 | 12.17424 | 10.2338  | 11.52296 |
| 17506291 | Foxf1        | forkhead box F1                                                                    | 26.21953 | 21.76759 | 22.34918 | 23.2389  | 19.63846 | 20.77433 |

|          |          |                                                                              |          |          |          |          |          |          |
|----------|----------|------------------------------------------------------------------------------|----------|----------|----------|----------|----------|----------|
| 17286332 | Foxf2    | forkhead box F2                                                              | 5.555358 | 5.759885 | 6.561383 | 6.441247 | 7.974146 | 6.040299 |
| 17275306 | Foxg1    | forkhead box G1                                                              | 3.464003 | 3.440886 | 3.870205 | 3.616389 | 4.478762 | 3.840888 |
| 17318665 | Foxh1    | forkhead box H1                                                              | 6.524648 | 6.714547 | 5.238595 | 5.525787 | 4.644876 | 8.923378 |
| 17261645 | Foxi1    | forkhead box I1                                                              | 27.25464 | 30.60807 | 31.85328 | 24.40576 | 25.21028 | 20.88724 |
| 17484229 | Foxi2    | forkhead box I2                                                              | 8.63227  | 7.294606 | 6.992896 | 6.992896 | 6.992896 | 8.790773 |
| 17459449 | Foxi3    | forkhead box I3                                                              | 7.519934 | 10.23515 | 8.398781 | 9.756272 | 9.393482 | 6.589779 |
| 17272339 | Foxj1    | forkhead box J1                                                              | 7.399101 | 6.860482 | 8.741434 | 6.755909 | 5.996954 | 8.43466  |
| 17462705 | Foxj2    | forkhead box J2                                                              | 26.01425 | 34.82472 | 45.02767 | 32.35664 | 31.77698 | 37.60467 |
| 17417926 | Foxj3    | forkhead box J3                                                              | 29.21161 | 28.21362 | 29.41867 | 26.9044  | 28.84281 | 28.93212 |
| 17444202 | Foxk1    | forkhead box K1                                                              | 38.72974 | 39.4945  | 49.33946 | 33.90768 | 45.07514 | 46.8946  |
| 17259600 | Foxk2    | forkhead box K2                                                              | 30.81199 | 33.5114  | 31.19926 | 27.69378 | 35.68387 | 22.83081 |
| 17506300 | Foxl1    | forkhead box L1                                                              | 8.158025 | 9.79829  | 11.35314 | 8.51685  | 7.972764 | 7.818815 |
| 17520675 | Foxl2    | forkhead box L2                                                              | 8.135945 | 8.093199 | 7.451289 | 7.753512 | 7.951682 | 7.624063 |
| 17529981 | Foxl2os  | forkhead box L2, opposite strand                                             | 3.865996 | 4.121016 | 3.729055 | 3.745297 | 3.729055 | 3.729055 |
| 17463401 | Foxm1    | forkhead box M1                                                              | 4.802648 | 5.91427  | 6.250146 | 5.956686 | 6.535919 | 5.726882 |
| 17266424 | Foxn1    | forkhead box N1                                                              | 4.514981 | 3.913122 | 3.469024 | 4.141232 | 4.20408  | 4.008604 |
| 17340323 | Foxn2    | forkhead box N2                                                              | 47.72952 | 38.82704 | 44.53198 | 41.05454 | 39.78713 | 32.23732 |
| 17283203 | Foxn3    | forkhead box N3                                                              | 84.81926 | 84.81926 | 64.99649 | 76.10134 | 56.99407 | 75.1265  |
| 17451512 | Foxn4    | forkhead box N4                                                              | 6.217351 | 9.747485 | 7.517849 | 6.779693 | 6.820417 | 7.050668 |
| 17397497 | Foxo1    | forkhead box O1                                                              | 46.167   | 72.77444 | 76.21273 | 82.46614 | 82.62807 | 98.86514 |
| 17240529 | Foxo3    | forkhead box O3                                                              | 29.9549  | 32.27779 | 36.54343 | 37.84209 | 38.54842 | 47.22176 |
| 17536657 | Foxo4    | forkhead box O4                                                              | 20.91593 | 25.27396 | 26.17758 | 28.18606 | 28.83342 | 24.04908 |
| 17429449 | Foxo6    | forkhead box O6                                                              | 14.77996 | 16.59964 | 14.81031 | 16.11978 | 17.57375 | 13.39098 |
| 17417985 | Foxo6os  | forkhead box O6, opposite strand                                             | 4.01461  | 4.20927  | 3.448598 | 4.793303 | 4.809244 | 4.521464 |
| 17469414 | Foxp1    | forkhead box P1                                                              | 36.74765 | 45.62776 | 45.02767 | 39.14022 | 55.78479 | 46.561   |
| 17456084 | Foxp2    | forkhead box P2                                                              | 9.162746 | 14.4805  | 17.27208 | 14.59305 | 15.99301 | 14.5334  |
| 17532811 | Foxp3    | forkhead box P3                                                              | 6.450943 | 7.129001 | 6.924117 | 5.685393 | 7.271686 | 7.302093 |
| 17345740 | Foxp4    | forkhead box P4                                                              | 28.58884 | 26.22771 | 27.07482 | 29.19137 | 23.14358 | 24.53875 |
| 17286320 | Foxq1    | forkhead box Q1                                                              | 114.2516 | 23.77939 | 41.31289 | 30.56037 | 55.479   | 38.46915 |
| 17526287 | Foxr1    | forkhead box R1                                                              | 5.28583  | 6.355519 | 4.651223 | 5.099126 | 4.908152 | 4.883278 |
| 17538983 | Foxr2    | forkhead box R2                                                              | 3.899583 | 3.861523 | 3.604752 | 3.617267 | 3.635264 | 4.764319 |
| 17393004 | Foxs1    | forkhead box S1                                                              | 8.406994 | 8.659418 | 8.743495 | 8.743495 | 12.63917 | 9.020891 |
| 17432347 | Fhad1    | forkhead-associated (FHA) phosphopeptide binding domain 1                    | 4.28644  | 4.20927  | 4.967121 | 5.239648 | 3.772053 | 4.46695  |
| 17421145 | Fhad1os1 | forkhead-associated (FHA) phosphopeptide binding domain 1, opposite strand 1 | 3.938619 | 5.206053 | 4.20927  | 4.20927  | 4.227457 | 4.630731 |
| 17421142 | Fhad1os2 | forkhead-associated (FHA) phosphopeptide binding domain 1, opposite strand 2 | 12.28452 | 11.78941 | 12.28452 | 12.28452 | 10.48228 | 14.69364 |
| 17234588 | Ftcd     | forminotransferase cyclodeaminase                                            | 233.6945 | 242.9928 | 253.6244 | 300.1105 | 268.4352 | 287.4147 |
| 17374332 | Fmn1     | formin 1                                                                     | 10.43313 | 14.62718 | 15.23914 | 16.65531 | 18.81485 | 14.62718 |
| 17219766 | Fmn2     | formin 2                                                                     | 3.654388 | 2.664546 | 2.905326 | 3.840808 | 3.025828 | 3.186141 |
| 17383748 | Fnbp1    | formin binding protein 1                                                     | 40.16119 | 38.36211 | 48.28222 | 37.66154 | 37.02608 | 31.97273 |
| 17409963 | Fnbp1l   | formin binding protein 1-like                                                | 49.80884 | 46.29807 | 48.62715 | 47.3903  | 36.4329  | 48.6946  |
| 17373028 | Fnbp4    | formin binding protein 4                                                     | 23.0397  | 34.7206  | 31.90587 | 24.86596 | 23.89605 | 24.97184 |
| 17512388 | Fhod1    | formin homology 2 domain containing 1                                        | 13.18029 | 12.5597  | 13.28494 | 14.91622 | 11.71585 | 13.18029 |
| 17349034 | Fhod3    | formin homology 2 domain containing 3                                        | 14.54025 | 15.255   | 13.0578  | 11.9337  | 17.39391 | 16.41576 |
| 17257100 | Fmn1l    | formin-like 1                                                                | 7.459867 | 7.668211 | 7.942593 | 7.545257 | 7.935109 | 6.79244  |
| 17370807 | Fmn12    | formin-like 2                                                                | 18.37917 | 18.95833 | 18.64    | 19.70487 | 17.44413 | 15.3561  |
| 17321524 | Fmn13    | formin-like 3                                                                | 11.08088 | 13.43813 | 15.87506 | 16.92273 | 10.55745 | 13.30734 |
| 17341276 | Fpr1     | formyl peptide receptor 1                                                    | 14.10574 | 17.60533 | 14.29273 | 15.008   | 18.22517 | 14.61158 |
| 17333731 | Fpr2     | formyl peptide receptor 2                                                    | 5.577583 | 3.938128 | 4.059494 | 4.345554 | 4.352065 | 4.453193 |
| 17333739 | Fpr3     | formyl peptide receptor 3                                                    | 3.511506 | 3.593476 | 3.115622 | 4.16348  | 3.758664 | 3.586956 |
| 17341340 | Fpr-rs3  | formyl peptide receptor, related sequence 3                                  | 3.735289 | 2.805621 | 3.470876 | 4.184079 | 3.23232  | 3.149821 |
| 17333742 | Fpr-rs4  | formyl peptide receptor, related sequence 4                                  | 2.586498 | 2.918041 | 2.606909 | 2.606909 | 2.188921 | 2.557865 |
| 17341303 | Fpr-rs6  | formyl peptide receptor, related sequence 6                                  | 1.94813  | 2.275731 | 2.063037 | 2.236713 | 2.064854 | 2.779085 |
| 17341300 | Fpr-rs7  | formyl peptide receptor, related sequence 7                                  | 1.941417 | 2.336583 | 1.982884 | 1.902821 | 1.884419 | 2.152794 |
| 17324916 | Fyttd1   | forty-two-three domain containing 1                                          | 22.65645 | 26.22753 | 19.29373 | 20.94741 | 21.71906 | 22.53444 |
| 17356427 | Fosl1    | fos-like antigen 1                                                           | 4.18521  | 3.675702 | 3.480851 | 5.007012 | 6.051111 | 4.736364 |
| 17436237 | Fosl2    | fos-like antigen 2                                                           | 39.5652  | 42.50586 | 49.60212 | 40.24507 | 37.57419 | 42.3362  |
| 17534960 | Fhl1     | four and a half LIM domains 1                                                | 30.13253 | 33.98909 | 34.26895 | 21.58774 | 29.93082 | 32.35148 |
| 17222642 | Fhl2     | four and a half LIM domains 2                                                | 13.88745 | 21.87347 | 17.67845 | 17.67845 | 18.39217 | 17.96267 |
| 17418271 | Fhl3     | four and a half LIM domains 3                                                | 16.93599 | 17.29328 | 14.96697 | 15.82123 | 14.87791 | 14.63834 |
| 17243633 | Fhl4     | four and a half LIM domains 4                                                | 3.011266 | 2.774523 | 3.011266 | 3.011266 | 3.553745 | 3.366105 |
| 17423665 | Fhl5     | four and a half LIM domains 5                                                | 3.437596 | 3.014336 | 3.010222 | 3.061312 | 3.162072 | 3.339333 |
| 17388725 | Fjx1     | four jointed box 1 (Drosophila)                                              | 5.457537 | 4.90261  | 6.478995 | 4.859036 | 6.58608  | 5.296135 |
| 17513550 | Fendrr   | Foxf1 adjacent non-coding developmental regulatory RNA                       | 7.988585 | 7.631147 | 9.163    | 10.90305 | 12.4075  | 9.221619 |
| 17507128 | Fcor     | Foxo1 corepressor                                                            | 5.717958 | 4.647388 | 5.141039 | 5.191927 | 4.899383 | 5.447144 |
| 17364350 | Fra10ac1 | FRA10AC1 homolog (human)                                                     | 31.48843 | 23.79506 | 27.17579 | 33.69938 | 36.6261  | 30.89454 |
| 17303474 | Fhit     | fragile histidine triad gene                                                 | 10.09907 | 11.58005 | 9.200613 | 10.1335  | 13.79688 | 10.19387 |
| 17297116 | Fhitos   | fragile histidine triad gene, opposite strand                                | 3.723218 | 4.408507 | 3.873667 | 4.620279 | 3.183359 | 4.814347 |
| 17535233 | Fmr1nb   | fragile X mental retardation 1 neighbor                                      | 2.700263 | 3.688643 | 2.933331 | 3.378587 | 3.772341 | 3.339703 |
| 17396823 | Fxr1     | fragile X mental retardation gene 1, autosomal homolog                       | 129.9714 | 120.1339 | 115.828  | 115.828  | 131.1387 | 127.9565 |
| 17535208 | Fmr1     | fragile X mental retardation syndrome 1                                      | 47.62311 | 37.13043 | 44.78551 | 48.57089 | 43.43602 | 53.33276 |
| 17542121 | Fmr1os   | fragile X mental retardation syndrome 1, opposite strand                     | 3.143736 | 3.5442   | 3.367038 | 3.29674  | 3.459611 | 3.29674  |
| 17251687 | Fxr2     | fragile X mental retardation, autosomal homolog 2                            | 40.54129 | 41.64929 | 44.23235 | 41.0833  | 37.51485 | 43.22308 |
| 17426808 | Frem1    | Fras1 related extracellular matrix protein 1                                 | 5.48933  | 6.002485 | 5.48933  | 5.48933  | 4.656416 | 5.48933  |
| 17405208 | Frem2    | Fras1 related extracellular matrix protein 2                                 | 5.270026 | 5.050303 | 6.425728 | 5.705329 | 6.665439 | 5.839804 |
| 17502799 | Frem3    | Fras1 related extracellular matrix protein 3                                 | 3.00399  | 2.823589 | 2.326321 | 2.772716 | 2.818954 | 3.042421 |
| 17439388 | Fras1    | Fraser syndrome 1 homolog (human)                                            | 4.608062 | 4.528207 | 4.091302 | 3.921838 | 4.1864   | 4.886969 |
| 17363598 | Fxn      | frataxin                                                                     | 61.8315  | 56.50435 | 54.18344 | 58.73669 | 59.86496 | 63.76708 |
| 17489318 | Ffar1    | free fatty acid receptor 1                                                   | 6.205081 | 8.642088 | 7.186005 | 11.50963 | 7.057514 | 6.462803 |
| 17489304 | Ffar2    | free fatty acid receptor 2                                                   | 3.523429 | 3.278896 | 4.194038 | 3.595344 | 3.61817  | 3.979728 |
| 17489314 | Ffar3    | free fatty acid receptor 3                                                   | 2.878007 | 3.263862 | 3.263862 | 3.703322 | 3.085747 | 3.118906 |
| 17359113 | Ffar4    | free fatty acid receptor 4                                                   | 6.790604 | 7.515036 | 7.698994 | 7.278595 | 15.2787  | 7.559129 |
| 17359464 | Frat1    | frequently rearranged in advanced T cell lymphomas                           | 24.1612  | 24.23517 | 24.7856  | 27.42025 | 26.64642 | 23.45348 |
| 17364721 | Frat2    | frequently rearranged in advanced T cell lymphomas 2                         | 5.919355 | 10.57532 | 7.63755  | 7.299158 | 7.287884 | 7.736977 |
| 17525310 | Fli1     | Friend leukemia integration 1                                                | 48.38339 | 57.1135  | 54.90935 | 45.18087 | 39.89456 | 39.64728 |

|          |               |                                                     |          |          |          |          |          |          |
|----------|---------------|-----------------------------------------------------|----------|----------|----------|----------|----------|----------|
| 17421534 | Fv1           | Friend virus susceptibility 1                       | 12.0469  | 9.20712  | 9.277139 | 10.16607 | 11.6151  | 12.58776 |
| 17445325 | Fzd1          | frizzled homolog 1 (Drosophila)                     | 21.43134 | 25.46899 | 23.05552 | 25.83599 | 25.94815 | 23.76852 |
| 17442796 | Fzd10         | frizzled homolog 10 (Drosophila)                    | 3.555839 | 3.213733 | 3.19523  | 2.998664 | 2.717839 | 3.000099 |
| 17256975 | Fzd2          | frizzled homolog 2 (Drosophila)                     | 4.070342 | 4.987822 | 3.793843 | 4.144764 | 4.210174 | 4.558724 |
| 17307738 | Fzd3          | frizzled homolog 3 (Drosophila)                     | 5.082647 | 4.350707 | 4.461318 | 4.318918 | 3.611955 | 4.740174 |
| 17480036 | Fzd4          | frizzled homolog 4 (Drosophila)                     | 49.4641  | 58.85406 | 76.7971  | 55.86915 | 51.40405 | 69.38587 |
| 17223793 | Fzd5          | frizzled homolog 5 (Drosophila)                     | 25.22269 | 16.30768 | 19.96277 | 24.75109 | 15.05812 | 22.0984  |
| 17311179 | Fzd6          | frizzled homolog 6 (Drosophila)                     | 12.94919 | 13.35807 | 12.17466 | 12.211   | 11.40694 | 9.527251 |
| 17213265 | Fzd7          | frizzled homolog 7 (Drosophila)                     | 24.36773 | 24.78216 | 22.05387 | 30.3899  | 23.69006 | 28.29941 |
| 17348276 | Fzd8          | frizzled homolog 8 (Drosophila)                     | 8.038743 | 6.992896 | 7.698994 | 8.306784 | 9.997241 | 19.32585 |
| 17453541 | Fzd9          | frizzled homolog 9 (Drosophila)                     | 9.219893 | 7.120359 | 6.292049 | 6.746457 | 5.516144 | 6.958325 |
| 17387305 | Frzb          | frizzled-related protein                            | 20.64585 | 17.4225  | 29.27039 | 21.17779 | 15.09386 | 20.31861 |
| 17259623 | Fn3k          | fructosamine 3 kinase                               | 6.901357 | 9.646463 | 9.237036 | 9.488039 | 4.839809 | 8.360273 |
| 17259613 | Fn3krp        | fructosamine 3 kinase related protein               | 20.59768 | 23.31716 | 21.08829 | 30.63354 | 23.30068 | 29.79194 |
| 17293557 | Fbp1          | fructose biphosphatase 1                            | 1300.427 | 1471.345 | 1445.427 | 1458.43  | 1465.178 | 1470.081 |
| 17293547 | Fbp2          | fructose biphosphatase 2                            | 6.482319 | 8.396395 | 16.84245 | 8.343716 | 8.599603 | 11.24366 |
| 17508968 | Frg1          | FSHD region gene 1                                  | 28.03583 | 31.54436 | 31.87515 | 32.59797 | 36.27491 | 36.60731 |
| 17540075 | Ftsj1         | FtsJ homolog 1 (E. coli)                            | 63.93792 | 56.62825 | 52.37694 | 46.40763 | 45.13079 | 50.81773 |
| 17454546 | Ftsj2         | FtsJ homolog 2 (E. coli)                            | 24.82772 | 22.04012 | 18.12727 | 20.74009 | 22.04012 | 25.53174 |
| 17270783 | Ftsj3         | FtsJ homolog 3 (E. coli)                            | 60.42108 | 45.51247 | 48.46966 | 51.86826 | 48.98065 | 51.05003 |
| 17543795 | Ftx           | Ftx transcript, Xist regulator (non-protein coding) | 13.32173 | 15.17464 | 12.49943 | 12.53708 | 11.52744 | 12.53708 |
| 17512944 | Fuk           | fucokinase                                          | 19.42873 | 28.57536 | 24.06209 | 24.27619 | 24.98499 | 27.52632 |
| 17497595 | Fuom          | fucose mutarotase                                   | 14.72433 | 13.88158 | 15.92377 | 14.5462  | 15.26716 | 14.94333 |
| 17411392 | Fpgt          | fucose-1-phosphate guanylyltransferase              | 21.09487 | 21.09487 | 23.10719 | 23.88909 | 25.46952 | 19.96194 |
| 17419965 | Fuca1         | fucosidase, alpha-L- 1, tissue                      | 107.8371 | 83.35634 | 94.30288 | 98.1108  | 92.85193 | 90.67607 |
| 17231717 | Fuca2         | fucosidase, alpha-L- 2, plasma                      | 16.16722 | 16.16722 | 13.89255 | 15.43678 | 16.16722 | 16.16722 |
| 17477914 | Fut1          | fucosyltransferase 1                                | 4.690755 | 3.757883 | 4.742113 | 4.569765 | 3.248086 | 3.699243 |
| 17500412 | Fut10         | fucosyltransferase 10                               | 6.531933 | 6.671448 | 6.2989   | 6.486049 | 6.960978 | 4.789151 |
| 17297490 | Fut11         | fucosyltransferase 11                               | 14.50914 | 19.79782 | 14.75917 | 16.23595 | 15.8656  | 12.57085 |
| 17490912 | Fut2          | fucosyltransferase 2                                | 5.638377 | 7.794951 | 6.283289 | 6.030594 | 5.246626 | 5.13883  |
| 17524077 | Fut4          | fucosyltransferase 4                                | 4.901149 | 4.136126 | 3.169906 | 3.892913 | 3.263862 | 3.396432 |
| 17338879 | Fut4-ps1      | fucosyltransferase 4, pseudogene 1                  | 3.362397 | 3.362397 | 3.362397 | 5.075078 | 3.332073 | 3.56858  |
| 17367999 | Fut7          | fucosyltransferase 7                                | 4.513229 | 6.1409   | 5.490281 | 4.906179 | 6.54848  | 5.412969 |
| 17276642 | Fut8          | fucosyltransferase 8                                | 20.47242 | 22.17758 | 27.15733 | 22.24054 | 25.79519 | 21.34964 |
| 17423701 | Fut9          | fucosyltransferase 9                                | 4.350617 | 5.013785 | 3.992189 | 3.992189 | 4.269716 | 4.097972 |
| 17414228 | Fktn          | fukutin                                             | 12.01379 | 10.65324 | 13.22962 | 13.8888  | 13.39906 | 11.46838 |
| 17486959 | Fknp          | fukutin related protein                             | 16.64515 | 15.25204 | 12.94399 | 15.28368 | 16.23078 | 12.47087 |
| 17230153 | Fh1           | fumarate hydratase 1                                | 350.41   | 419.3323 | 546.7547 | 439.4119 | 418.3945 | 474.2914 |
| 17493005 | Fah           | fumarylacetoacetate hydrolase                       | 520.6392 | 574.8812 | 600.3125 | 560.6785 | 599.6097 | 578.948  |
| 17342038 | Fahd1         | fumarylacetoacetate hydrolase domain containing 1   | 31.28892 | 27.3305  | 26.81689 | 32.29861 | 37.3848  | 35.47793 |
| 17391259 | Fahd2a        | fumarylacetoacetate hydrolase domain containing 2A  | 11.46798 | 12.9605  | 10.67105 | 12.41842 | 11.01746 | 11.15486 |
| 17540420 | Fundc1        | FUN14 domain containing 1                           | 5.338965 | 5.166402 | 5.431083 | 5.848878 | 5.338965 | 5.914639 |
| 17535951 | Fundc2        | FUN14 domain containing 2                           | 7.836666 | 16.23595 | 16.62889 | 19.81581 | 10.50868 | 15.43764 |
| 17405001 | 1700034I23Rik | FUN14 domain containing 2 pseudogene                | 3.474198 | 2.374132 | 2.482373 | 2.780974 | 3.344476 | 2.533005 |
| 17404993 | Gm10731       | FUN14 domain containing 2 pseudogene                | 4.944141 | 4.657901 | 3.915509 | 4.339173 | 3.429124 | 3.828529 |
| 17541567 | Firre         | functional intergenic repeating RNA element         | 14.00073 | 17.51659 | 21.0012  | 17.87882 | 14.27976 | 17.69488 |
| 17492598 | Furin         | furin (paired basic amino acid cleaving enzyme)     | 251.5341 | 260.334  | 270.8894 | 250.0998 | 273.3679 | 258.3924 |
| 17445089 | Fry           | furry homolog (Drosophila)                          | 5.669769 | 5.681808 | 5.500489 | 5.669769 | 6.201856 | 5.538748 |
| 17445160 | Fry           | furry homolog (Drosophila)                          | 2.256755 | 2.028509 | 2.045509 | 2.083357 | 2.083357 | 2.408091 |
| 17448740 | Fryl          | furry homolog-like (Drosophila)                     | 28.29294 | 29.6648  | 29.6648  | 31.29434 | 29.48379 | 27.02945 |
| 17483546 | Fus           | fused in sarcoma                                    | 44.89367 | 75.07757 | 74.15078 | 67.86379 | 93.39219 | 61.56677 |
| 17477619 | Fuz           | fuzzy homolog (Drosophila)                          | 24.09898 | 24.57007 | 36.48825 | 30.06264 | 29.41459 | 33.2025  |
| 17489420 | Fxyd1         | FXYP domain-containing ion transport regulator 1    | 158.8444 | 215.1069 | 294.0382 | 226.5114 | 239.3155 | 213.4065 |
| 17516784 | Fxyd2         | FXYP domain-containing ion transport regulator 2    | 3.462322 | 3.568604 | 3.972122 | 3.703322 | 3.703322 | 3.703322 |
| 17489431 | Fxyd3         | FXYP domain-containing ion transport regulator 3    | 4.698206 | 5.789224 | 5.828239 | 7.194428 | 6.647537 | 5.924773 |
| 17470095 | Fxyd4         | FXYP domain-containing ion transport regulator 4    | 3.535857 | 3.406122 | 3.729055 | 3.729055 | 3.342204 | 3.729055 |
| 17489399 | Fxyd5         | FXYP domain-containing ion transport regulator 5    | 12.5937  | 16.44937 | 25.43565 | 13.77901 | 15.71336 | 12.25722 |
| 17516777 | Fxyd6         | FXYP domain-containing ion transport regulator 6    | 5.67197  | 9.421782 | 10.64202 | 7.698994 | 7.761201 | 6.937231 |
| 17489414 | Fxyd7         | FXYP domain-containing ion transport regulator 7    | 15.09397 | 13.12914 | 16.21537 | 15.2697  | 20.12867 | 14.34106 |
| 17309981 | Fyb           | FYN binding protein                                 | 8.501338 | 15.15456 | 10.55438 | 11.15416 | 14.80805 | 11.53575 |
| 17232649 | Fyn           | Fyn proto-oncogene                                  | 18.0593  | 14.38626 | 15.60958 | 14.02948 | 11.6417  | 12.41343 |
| 17232534 | Frk           | fyn-related kinase                                  | 7.850094 | 9.157793 | 11.93428 | 11.21891 | 10.7828  | 10.29855 |
| 17532540 | Fyco1         | FYVE and coiled-coil domain containing 1            | 92.11665 | 94.34407 | 101.9586 | 101.9692 | 87.4393  | 89.53067 |
| 17538628 | Fgd1          | FYVE, RhoGEF and PH domain containing 1             | 7.128359 | 10.95183 | 14.2421  | 9.310251 | 9.310251 | 9.599239 |
| 17335519 | Fgd2          | FYVE, RhoGEF and PH domain containing 2             | 9.189077 | 14.16442 | 12.22489 | 10.02833 | 13.10877 | 10.23125 |
| 17292450 | Fgd3          | FYVE, RhoGEF and PH domain containing 3             | 5.917304 | 7.912042 | 9.810115 | 6.949889 | 6.090286 | 6.266066 |
| 17328508 | Fgd4          | FYVE, RhoGEF and PH domain containing 4             | 34.50683 | 34.01549 | 33.33417 | 31.27093 | 37.09801 | 37.83475 |
| 17460994 | Fgd5          | FYVE, RhoGEF and PH domain containing 5             | 11.13686 | 13.38022 | 13.20242 | 14.72208 | 12.13767 | 10.51801 |
| 17236638 | Fgd6          | FYVE, RhoGEF and PH domain containing 6             | 75.48196 | 64.51667 | 66.88218 | 62.19212 | 61.36908 | 71.11392 |
| 17398152 | Gfm1          | G elongation factor, mitochondrial 1                | 168.5941 | 161.8664 | 138.7131 | 150.0282 | 123.681  | 136.3178 |
| 17289344 | Gfm2          | G elongation factor, mitochondrial 2                | 117.6257 | 95.91403 | 100.5954 | 104.9305 | 91.05965 | 101.2277 |
| 17293103 | Gkap1         | G kinase anchoring protein 1                        | 29.21769 | 34.776   | 38.19972 | 33.31569 | 32.80605 | 34.53028 |
| 17336970 | Gpank1        | G patch domain and ankyrin repeats 1                | 8.069728 | 5.825977 | 6.522161 | 4.370414 | 5.48933  | 4.936471 |
| 17532908 | Gpkow         | G patch domain and KOW motifs                       | 29.4556  | 28.58131 | 27.09923 | 33.33255 | 26.63904 | 23.29454 |
| 17489738 | Gpatch1       | G patch domain containing 1                         | 33.0102  | 26.98078 | 26.04185 | 28.40829 | 26.77918 | 27.3724  |
| 17339840 | Gpatch11      | G patch domain containing 11                        | 21.5044  | 23.63151 | 24.29656 | 22.52351 | 28.25022 | 22.54007 |
| 17220608 | Gpatch2       | G patch domain containing 2                         | 10.41665 | 10.38033 | 10.41665 | 10.41665 | 10.84862 | 9.61762  |
| 17548948 | Gpatch2       | G patch domain containing 2                         | 8.50741  | 7.975915 | 11.09963 | 8.426304 | 7.885542 | 10.37443 |
| 17277490 | Gpatch2l      | G patch domain containing 2 like                    | 23.65363 | 26.99069 | 25.09208 | 25.25015 | 18.66689 | 23.62774 |
| 17419626 | Gpatch3       | G patch domain containing 3                         | 13.34558 | 14.50843 | 13.51566 | 16.17585 | 13.47889 | 14.11728 |
| 17398915 | Gpatch4       | G patch domain containing 4                         | 18.62954 | 21.8721  | 24.71766 | 25.16593 | 28.15541 | 23.05615 |
| 17270269 | Gpatch8       | G patch domain containing 8                         | 29.60194 | 29.45315 | 28.79507 | 32.27891 | 26.91671 | 36.38571 |
| 17259512 | Gps1          | G protein pathway suppressor 1                      | 85.91928 | 78.21753 | 76.34702 | 85.09427 | 79.27697 | 78.0491  |
| 17251799 | Gps2          | G protein pathway suppressor 2                      | 13.49572 | 19.62962 | 23.53246 | 19.62771 | 17.40971 | 17.71206 |

|          |            |                                                         |          |          |          |          |          |          |
|----------|------------|---------------------------------------------------------|----------|----------|----------|----------|----------|----------|
| 17305012 | Gprn2      | G protein regulated inducer of neurite outgrowth 2      | 18.592   | 20.86626 | 21.18469 | 15.66063 | 14.84803 | 18.49649 |
| 17214162 | Gpbar1     | G protein-coupled bile acid receptor 1                  | 5.7136   | 7.466386 | 6.992896 | 6.322039 | 5.660934 | 8.123098 |
| 17444016 | Gper1      | G protein-coupled estrogen receptor 1                   | 10.00591 | 10.43783 | 10.43783 | 12.99937 | 12.13465 | 11.37236 |
| 17223710 | Gpr1       | G protein-coupled receptor 1                            | 3.300901 | 3.026709 | 3.462826 | 2.840943 | 3.519572 | 3.337065 |
| 17541919 | Gpr101     | G protein-coupled receptor 101                          | 13.55676 | 16.94761 | 12.742   | 14.03075 | 13.12713 | 12.91531 |
| 17369340 | Gpr107     | G protein-coupled receptor 107                          | 17.10149 | 30.19651 | 26.03553 | 20.86626 | 18.78709 | 22.3746  |
| 17346572 | Gpr108     | G protein-coupled receptor 108                          | 43.75634 | 33.80583 | 33.71643 | 41.81069 | 37.38895 | 42.17511 |
| 17284247 | Gpr132     | G protein-coupled receptor 132                          | 10.71597 | 12.21879 | 9.520913 | 9.59538  | 10.48228 | 5.731171 |
| 17281789 | Gpr135     | G protein-coupled receptor 135                          | 11.30336 | 10.29855 | 10.29855 | 9.919862 | 9.485475 | 10.29855 |
| 17362138 | Gpr137     | G protein-coupled receptor 137                          | 19.91923 | 22.17481 | 19.06851 | 21.38534 | 18.99147 | 20.27233 |
| 17290695 | Gpr137b    | G protein-coupled receptor 137B                         | 4.216658 | 6.36897  | 5.552972 | 3.984448 | 4.119788 | 3.570757 |
| 17290655 | Gpr137b-ps | G protein-coupled receptor 137B, pseudogene             | 4.67994  | 6.451032 | 5.957388 | 6.171709 | 8.442791 | 7.072156 |
| 17299185 | Gpr137c    | G protein-coupled receptor 137C                         | 3.595943 | 2.953407 | 3.863585 | 3.09586  | 3.465251 | 3.267552 |
| 17495617 | Gpr139     | G protein-coupled receptor 139                          | 3.161655 | 4.531316 | 4.938661 | 4.499485 | 3.317899 | 3.997866 |
| 17290894 | Gpr141     | G protein-coupled receptor 141                          | 2.600466 | 2.606909 | 3.209614 | 2.894732 | 3.156859 | 2.606909 |
| 17258089 | Gpr142     | G protein-coupled receptor 142                          | 4.828617 | 4.636673 | 4.636673 | 4.636673 | 2.924257 | 4.280947 |
| 17538960 | Gpr143     | G protein-coupled receptor 143                          | 3.476872 | 3.160779 | 3.525334 | 3.371849 | 3.56292  | 3.805774 |
| 17444002 | Gpr146     | G protein-coupled receptor 146                          | 57.66124 | 70.82319 | 83.8152  | 74.5228  | 76.79338 | 80.28842 |
| 17405541 | Gpr149     | G protein-coupled receptor 149                          | 5.478876 | 5.168301 | 4.132773 | 7.025642 | 5.535524 | 5.213131 |
| 17331212 | Gpr15      | G protein-coupled receptor 15                           | 3.078505 | 3.783155 | 2.348322 | 3.260583 | 3.442961 | 3.103143 |
| 17294485 | Gpr150     | G protein-coupled receptor 150                          | 5.235365 | 4.536344 | 4.545598 | 4.538136 | 5.145816 | 5.456289 |
| 17354074 | Gpr151     | G protein-coupled receptor 151                          | 4.20927  | 3.720045 | 3.877052 | 4.651706 | 4.20927  | 4.20927  |
| 17356153 | Gpr152     | G protein-coupled receptor 152                          | 4.573314 | 5.210168 | 5.453793 | 5.307712 | 4.735412 | 4.620023 |
| 17422138 | Gpr153     | G protein-coupled receptor 153                          | 9.056728 | 9.583881 | 10.01028 | 9.123517 | 8.266577 | 7.993459 |
| 17386514 | Gpr155     | G protein-coupled receptor 155                          | 56.66948 | 46.8998  | 41.93579 | 52.28445 | 52.3334  | 42.7603  |
| 17325540 | Gpr156     | G protein-coupled receptor 156                          | 5.666076 | 7.097249 | 5.710591 | 8.230557 | 5.369694 | 7.175056 |
| 17421867 | Gpr157     | G protein-coupled receptor 157                          | 9.485015 | 10.58119 | 14.22957 | 13.4731  | 9.259152 | 9.21772  |
| 17367458 | Gpr158     | G protein-coupled receptor 158                          | 3.744051 | 3.220132 | 4.20927  | 5.03283  | 3.235099 | 3.590065 |
| 17536428 | Pgr15l     | G protein-coupled receptor 15-like                      | 4.754093 | 4.638827 | 5.715065 | 5.713758 | 4.614774 | 4.886021 |
| 17396604 | Gpr160     | G protein-coupled receptor 160                          | 6.992896 | 7.105273 | 7.685079 | 7.790522 | 6.515248 | 6.992896 |
| 17218942 | Gpr161     | G protein-coupled receptor 161                          | 4.660937 | 5.797416 | 6.57805  | 5.932129 | 6.895332 | 5.941882 |
| 17470948 | Gpr162     | G protein-coupled receptor 162                          | 4.80125  | 5.101318 | 3.784388 | 4.670315 | 5.481687 | 4.730229 |
| 17536420 | Gpr165     | G protein-coupled receptor 165                          | 2.95652  | 3.106177 | 2.871511 | 2.750149 | 2.938684 | 2.638193 |
| 17353267 | Gpr17      | G protein-coupled receptor 17                           | 8.999345 | 8.875079 | 8.093143 | 8.68015  | 8.50517  | 9.699296 |
| 17405458 | Gpr171     | G protein-coupled receptor 171                          | 7.572082 | 7.759641 | 6.890459 | 7.307814 | 6.847513 | 8.614936 |
| 17537134 | Gpr174     | G protein-coupled receptor 174                          | 3.59694  | 2.908792 | 3.346887 | 2.890883 | 3.08032  | 3.08032  |
| 17389709 | Gpr176     | G protein-coupled receptor 176                          | 8.742283 | 8.51685  | 11.12798 | 9.488237 | 8.913858 | 8.3031   |
| 17268523 | Gpr179     | G protein-coupled receptor 179                          | 7.212953 | 6.081849 | 6.13116  | 6.958662 | 9.15773  | 7.467317 |
| 17309644 | Gpr18      | G protein-coupled receptor 18                           | 5.069523 | 4.43877  | 4.886969 | 5.003716 | 4.886969 | 3.914288 |
| 17302675 | Gpr180     | G protein-coupled receptor 180                          | 54.61631 | 32.88186 | 36.11434 | 37.41928 | 39.07462 | 36.32397 |
| 17246038 | Gpr182     | G protein-coupled receptor 182                          | 63.0909  | 47.33581 | 81.68108 | 54.58339 | 33.6842  | 47.37421 |
| 17309649 | Gpr183     | G protein-coupled receptor 183                          | 11.69768 | 12.55822 | 13.46666 | 11.75971 | 10.21587 | 12.6075  |
| 17472043 | Gpr19      | G protein-coupled receptor 19                           | 4.120416 | 3.321189 | 3.980722 | 4.726951 | 4.185326 | 4.191597 |
| 17317921 | Gpr20      | G protein-coupled receptor 20                           | 6.836605 | 5.721923 | 5.433644 | 5.889928 | 3.499843 | 5.433644 |
| 17370412 | Gpr21      | G protein-coupled receptor 21                           | 6.35856  | 6.280807 | 6.449467 | 6.7851   | 7.719353 | 5.620818 |
| 17280571 | Gpr22      | G protein-coupled receptor 22                           | 4.185645 | 5.334119 | 4.144592 | 4.469241 | 4.49101  | 5.274448 |
| 17227480 | Gpr25      | G protein-coupled receptor 25                           | 7.184412 | 7.600951 | 7.49454  | 7.393308 | 6.348035 | 6.236774 |
| 17484049 | Gpr26      | G protein-coupled receptor 26                           | 7.936209 | 8.422859 | 7.339491 | 6.411847 | 7.045734 | 7.923182 |
| 17461155 | Gpr27      | G protein-coupled receptor 27                           | 13.82819 | 13.06568 | 16.88558 | 9.788176 | 11.91891 | 17.0733  |
| 17340998 | Gpr31b     | G protein-coupled receptor 31, D17Leh66b region         | 9.902206 | 9.202016 | 8.9352   | 13.62279 | 15.04842 | 9.637975 |
| 17281071 | Gpr33      | G protein-coupled receptor 33                           | 4.690072 | 3.898773 | 3.944931 | 5.477889 | 3.75882  | 4.20927  |
| 17533446 | Gpr34      | G protein-coupled receptor 34                           | 3.892454 | 3.971351 | 3.884691 | 4.281125 | 4.857453 | 4.066704 |
| 17215873 | Gpr35      | G protein-coupled receptor 35                           | 10.3012  | 9.359945 | 10.34735 | 8.551574 | 10.22444 | 9.310251 |
| 17465238 | Gpr37      | G protein-coupled receptor 37                           | 3.815362 | 4.063323 | 4.063323 | 4.691893 | 4.086824 | 4.175214 |
| 17227261 | Gpr37l1    | G protein-coupled receptor 37-like 1                    | 10.24345 | 9.980901 | 8.422333 | 8.248547 | 8.597576 | 6.885386 |
| 17216745 | Gpr39      | G protein-coupled receptor 39                           | 9.083763 | 10.72867 | 10.98452 | 10.57745 | 11.4905  | 10.121   |
| 17474529 | Gpr4       | G protein-coupled receptor 4                            | 10.70802 | 11.67653 | 10.23004 | 9.404362 | 8.682196 | 11.48772 |
| 17212334 | Gpr45      | G protein-coupled receptor 45                           | 2.888439 | 3.49783  | 3.434405 | 4.304543 | 2.919781 | 3.729055 |
| 17228790 | Gpr52      | G protein-coupled receptor 52                           | 9.634969 | 13.44856 | 11.91734 | 10.63951 | 6.845899 | 9.903305 |
| 17225134 | Gpr55      | G protein-coupled receptor 55                           | 5.504914 | 5.809323 | 5.779321 | 4.664621 | 4.950211 | 4.741883 |
| 17240401 | Gpr6       | G protein-coupled receptor 6                            | 7.246478 | 6.514977 | 7.095577 | 8.09376  | 7.031195 | 9.853799 |
| 17409229 | Gpr61      | G protein-coupled receptor 61                           | 4.864293 | 5.246735 | 4.199391 | 3.999224 | 5.363594 | 5.551625 |
| 17530699 | Gpr62      | G protein-coupled receptor 62                           | 5.248227 | 4.836086 | 5.087123 | 5.087123 | 5.087123 | 4.725674 |
| 17412282 | Gpr63      | G protein-coupled receptor 63                           | 6.171709 | 6.171709 | 6.171709 | 6.207963 | 6.962184 | 6.274759 |
| 17283293 | Gpr68      | G protein-coupled receptor 68                           | 14.28669 | 13.50377 | 13.38439 | 12.31086 | 13.13614 | 13.39423 |
| 17248191 | Gpr75      | G protein-coupled receptor 75                           | 6.735056 | 8.450168 | 9.480808 | 9.391333 | 9.256521 | 10.29855 |
| 17533456 | Gpr82      | G protein-coupled receptor 82                           | 2.533251 | 2.446976 | 2.46403  | 2.515404 | 2.417926 | 3.056075 |
| 17514789 | Gpr83      | G protein-coupled receptor 83                           | 3.573877 | 4.639952 | 5.428298 | 3.286313 | 5.902884 | 3.729055 |
| 17322355 | Gpr84      | G protein-coupled receptor 84                           | 5.664231 | 3.916704 | 4.126847 | 4.461937 | 4.537665 | 4.754422 |
| 17464922 | Gpr85      | G protein-coupled receptor 85                           | 2.745026 | 3.829988 | 2.950031 | 3.044995 | 3.267574 | 3.059912 |
| 17405471 | Gpr87      | G protein-coupled receptor 87                           | 2.527673 | 2.820244 | 2.200849 | 2.715222 | 2.308827 | 2.745407 |
| 17408135 | Gpr89      | G protein-coupled receptor 89                           | 53.85917 | 39.48821 | 45.30788 | 39.57178 | 46.61977 | 42.77868 |
| 17537815 | Gprasp1    | G protein-coupled receptor associated sorting protein 1 | 11.56642 | 11.56642 | 11.53415 | 12.89169 | 10.40936 | 11.56642 |
| 17537839 | Gprasp2    | G protein-coupled receptor associated sorting protein 2 | 3.381258 | 3.588622 | 4.653738 | 4.20927  | 3.117112 | 3.325382 |
| 17499325 | Grk1       | G protein-coupled receptor kinase 1                     | 3.966729 | 3.616339 | 4.408598 | 5.592565 | 3.875655 | 3.508465 |
| 17436659 | Grk4       | G protein-coupled receptor kinase 4                     | 3.062691 | 3.577124 | 3.577124 | 3.577124 | 3.577124 | 3.577124 |
| 17360890 | Grk5       | G protein-coupled receptor kinase 5                     | 17.09888 | 14.24388 | 13.02381 | 17.64846 | 9.157222 | 17.89085 |
| 17287682 | Grk6       | G protein-coupled receptor kinase 6                     | 31.06913 | 25.3185  | 28.73227 | 38.91461 | 20.13523 | 25.00925 |
| 17253276 | Git1       | G protein-coupled receptor kinase-interactor 1          | 25.27116 | 26.45393 | 39.69815 | 29.53226 | 28.08932 | 27.96363 |
| 17451578 | Git2       | G protein-coupled receptor kinase-interactor 2          | 33.279   | 29.9495  | 31.00416 | 30.71454 | 22.13887 | 28.02262 |
| 17463747 | Gprc5a     | G protein-coupled receptor, family C, group 5, member A | 5.777158 | 5.8377   | 5.485298 | 4.794266 | 5.174466 | 5.906977 |
| 17495610 | Gprc5b     | G protein-coupled receptor, family C, group 5, member B | 19.78027 | 22.12384 | 19.37897 | 11.96468 | 16.94409 | 19.96125 |
| 17258093 | Gprc5c     | G protein-coupled receptor, family C, group 5, member C | 28.34102 | 31.00309 | 29.40317 | 30.10268 | 30.47174 | 31.00309 |
| 17472056 | Gprc5d     | G protein-coupled receptor, family C, group 5, member D | 3.462322 | 3.462322 | 3.462322 | 4.341429 | 3.462322 | 3.306626 |

|          |               |                                                                     |          |          |          |          |          |          |
|----------|---------------|---------------------------------------------------------------------|----------|----------|----------|----------|----------|----------|
| 17240737 | Gprc6a        | G protein-coupled receptor, family C, group 6, member A             | 4.93695  | 4.493564 | 4.527831 | 5.546663 | 5.04502  | 5.383446 |
| 17292753 | Gprin1        | G protein-regulated inducer of neurite outgrowth 1                  | 15.94663 | 11.91329 | 12.02963 | 12.13237 | 10.06427 | 13.08925 |
| 17313895 | Gtse1         | G two S phase expressed protein 1                                   | 10.02277 | 11.57331 | 10.50817 | 10.70772 | 9.506801 | 11.26129 |
| 17231248 | G0s2          | G0/G1 switch gene 2                                                 | 35.32457 | 73.44641 | 115.5329 | 97.48511 | 64.67248 | 75.37374 |
| 17328201 | Gspt1         | G1 to S phase transition 1                                          | 105.5513 | 111.5804 | 102.6443 | 111.2514 | 98.25099 | 102.6443 |
| 17536329 | Gspt2         | G1 to S phase transition 2                                          | 3.853368 | 5.490091 | 5.03859  | 5.080287 | 3.968297 | 3.7169   |
| 17222354 | 4930594C11Rik | G1 to S phase transition pseudogene                                 | 3.739797 | 3.063243 | 3.383297 | 3.379102 | 2.829309 | 3.015673 |
| 17275332 | G2e3          | G2/M-phase specific E3 ubiquitin ligase                             | 13.7964  | 13.06568 | 14.22523 | 13.06568 | 12.76764 | 13.66014 |
| 17336918 | G6bos         | G6b opposite strand                                                 | 9.438123 | 13.023   | 10.65966 | 13.05192 | 15.43849 | 11.24366 |
| 17326816 | Gabpa         | GA repeat binding protein, alpha                                    | 72.40312 | 80.96127 | 80.96127 | 81.88742 | 78.09563 | 82.67848 |
| 17391112 | Gabpb1        | GA repeat binding protein, beta 1                                   | 18.75925 | 18.04929 | 17.85591 | 15.91593 | 17.85591 | 15.39916 |
| 17407721 | Gabpb2        | GA repeat binding protein, beta 2                                   | 19.8224  | 18.65357 | 20.42211 | 18.5201  | 19.16803 | 19.1082  |
| 17272084 | Galk1         | galactokinase 1                                                     | 69.86171 | 90.21028 | 77.39884 | 73.79289 | 68.69152 | 58.55742 |
| 17375665 | Galk2         | galactokinase 2                                                     | 19.06507 | 20.65573 | 24.28612 | 20.18819 | 19.23404 | 21.65022 |
| 17513779 | Galns         | galactosamine (N-acetyl)-6-sulfate sulfatase                        | 14.96987 | 20.52172 | 20.63226 | 17.58459 | 14.54751 | 15.21392 |
| 17339910 | Galm          | galactose mutarotase                                                | 106.7957 | 135.5555 | 143.9925 | 132.1717 | 117.4359 | 140.056  |
| 17412932 | Galt          | galactose-1-phosphate uridyl transferase                            | 29.29454 | 30.55486 | 26.56104 | 24.62036 | 25.69134 | 27.01989 |
| 17246700 | Gal3st1       | galactose-3-O-sulfotransferase 1                                    | 15.06501 | 23.29454 | 24.58455 | 23.29454 | 13.91704 | 23.29454 |
| 17216113 | Gal3st2       | galactose-3-O-sulfotransferase 2                                    | 13.76955 | 8.976543 | 14.11424 | 10.41665 | 9.408339 | 5.655835 |
| 17356383 | Gal3st3       | galactose-3-O-sulfotransferase 3                                    | 17.9445  | 20.3917  | 15.77743 | 18.06456 | 17.81018 | 15.6359  |
| 17454301 | Gal3st4       | galactose-3-O-sulfotransferase 4                                    | 3.86147  | 3.34019  | 3.480851 | 3.121436 | 3.051355 | 3.480851 |
| 17419995 | Gale          | galactose-4-epimerase, UDP                                          | 19.64786 | 17.08822 | 16.95431 | 16.79826 | 20.97691 | 18.1318  |
| 17544517 | Gla           | galactosidase, alpha                                                | 16.06902 | 16.49835 | 17.45683 | 14.78703 | 11.28974 | 16.49835 |
| 17525118 | Glb1l3        | galactosidase, beta 1 like 3                                        | 2.688199 | 3.07309  | 2.687454 | 2.837696 | 2.609168 | 2.837696 |
| 17224520 | Glb1l         | galactosidase, beta 1-like                                          | 5.877978 | 7.76061  | 6.379795 | 7.975473 | 7.82581  | 6.976    |
| 17525090 | Glb1l2        | galactosidase, beta 1-like 2                                        | 2.789487 | 3.257579 | 3.459899 | 2.581465 | 2.581733 | 2.949417 |
| 17283096 | Galc          | galactosylceramidase                                                | 12.09878 | 10.6286  | 12.55761 | 10.38083 | 9.310251 | 15.02382 |
| 17360942 | Gal           | galanin                                                             | 3.412479 | 4.30708  | 4.30708  | 4.20927  | 3.519401 | 4.20927  |
| 17355732 | Galr1         | galanin receptor 1                                                  | 6.58786  | 7.718069 | 6.851026 | 7.000025 | 7.979896 | 6.563885 |
| 17258563 | Galr2         | galanin receptor 2                                                  | 4.452514 | 4.806744 | 3.91323  | 4.290423 | 4.320805 | 4.320805 |
| 17312899 | Galr3         | galanin receptor 3                                                  | 6.46464  | 12.73511 | 10.51779 | 11.56241 | 6.15987  | 8.613025 |
| 17473554 | Galp          | galanin-like peptide                                                | 9.482188 | 10.48228 | 10.64018 | 9.994677 | 10.72369 | 10.48228 |
| 17454568 | Grifin        | galectin-related inter-fiber protein                                | 20.9023  | 27.38777 | 25.40129 | 27.62361 | 20.42721 | 20.78456 |
| 17322402 | Gtsf1         | gametocyte specific factor 1                                        | 3.540885 | 3.657505 | 3.653502 | 3.438382 | 4.21248  | 3.876407 |
| 17394008 | Gtsf1l        | gametocyte specific factor 1-like                                   | 2.94172  | 2.895013 | 3.108482 | 2.736003 | 3.354249 | 3.623566 |
| 17476097 | Ggn           | gametogenetin                                                       | 16.41201 | 18.78853 | 14.91674 | 12.35189 | 14.24654 | 13.49544 |
| 17335046 | Ggnbp1        | gametogenetin binding protein 1                                     | 12.82023 | 10.79432 | 13.57999 | 15.51046 | 11.59588 | 12.98442 |
| 17267076 | Ggnbp2        | gametogenetin binding protein 2                                     | 119.5856 | 147.4978 | 133.6772 | 148.533  | 159.0945 | 162.0281 |
| 17254470 | Ggnbp2os      | gametogenetin binding protein 2, opposite strand                    | 10.51356 | 14.89091 | 17.21411 | 16.78848 | 13.99743 | 17.2319  |
| 17261608 | Gabbr         | gamma-aminobutyric acid (GABA) A receptor, pi                       | 5.754218 | 5.967142 | 3.921512 | 4.20927  | 4.618678 | 4.618678 |
| 17261896 | Gabra1        | gamma-aminobutyric acid (GABA) A receptor, subunit alpha 1          | 5.006318 | 4.669085 | 4.070822 | 4.8435   | 6.193393 | 4.221249 |
| 17448577 | Gabra2        | gamma-aminobutyric acid (GABA) A receptor, subunit alpha 2          | 3.607126 | 3.54506  | 4.221747 | 3.497151 | 3.54506  | 3.030635 |
| 17542220 | Gabra3        | gamma-aminobutyric acid (GABA) A receptor, subunit alpha 3          | 7.151372 | 11.99058 | 11.11865 | 9.472137 | 9.220724 | 10.09095 |
| 17448595 | Gabra4        | gamma-aminobutyric acid (GABA) A receptor, subunit alpha 4          | 2.363771 | 2.46275  | 2.695924 | 3.12555  | 3.935317 | 2.599763 |
| 17491480 | Gabra5        | gamma-aminobutyric acid (GABA) A receptor, subunit alpha 5          | 4.997373 | 5.310877 | 5.386134 | 5.386134 | 5.53422  | 5.63123  |
| 17261913 | Gabra6        | gamma-aminobutyric acid (GABA) A receptor, subunit alpha 6          | 2.710333 | 2.348777 | 2.67402  | 2.688497 | 2.708774 | 2.655972 |
| 17438022 | Gabbrb1       | gamma-aminobutyric acid (GABA) A receptor, subunit beta 1           | 2.963989 | 2.903917 | 2.944392 | 2.576192 | 2.676003 | 2.734638 |
| 17248539 | Gabbrb2       | gamma-aminobutyric acid (GABA) A receptor, subunit beta 2           | 3.881408 | 3.406925 | 2.866559 | 4.137301 | 3.406925 | 2.902769 |
| 17478730 | Gabbrb3       | gamma-aminobutyric acid (GABA) A receptor, subunit beta 3           | 18.8841  | 20.93623 | 16.3225  | 14.54509 | 13.82723 | 18.8841  |
| 17433787 | Gabrd         | gamma-aminobutyric acid (GABA) A receptor, subunit delta            | 5.275983 | 4.778275 | 4.647678 | 4.620792 | 4.662423 | 5.012812 |
| 17542194 | Gabre         | gamma-aminobutyric acid (GABA) A receptor, subunit epsilon          | 3.651426 | 4.047946 | 2.847192 | 3.582086 | 4.33175  | 3.482202 |
| 17448565 | Gabrg1        | gamma-aminobutyric acid (GABA) A receptor, subunit gamma 1          | 3.927578 | 3.00526  | 3.099037 | 3.150367 | 3.439717 | 2.750226 |
| 17261878 | Gabrg2        | gamma-aminobutyric acid (GABA) A receptor, subunit gamma 2          | 3.839717 | 3.48184  | 3.386887 | 3.107275 | 4.239929 | 3.272493 |
| 17491463 | Gabrg3        | gamma-aminobutyric acid (GABA) A receptor, subunit gamma 3          | 4.20927  | 3.942498 | 4.436586 | 4.20927  | 4.352065 | 3.931064 |
| 17535420 | Gabrq         | gamma-aminobutyric acid (GABA) A receptor, subunit theta            | 3.062691 | 3.062691 | 2.85684  | 2.951237 | 2.790183 | 4.20927  |
| 17463550 | Gabarapl1     | gamma-aminobutyric acid (GABA) A receptor-associated protein-like 1 | 374.9618 | 470.2552 | 461.7026 | 401.8296 | 400.4893 | 470.102  |
| 17505774 | Gabarapl2     | gamma-aminobutyric acid (GABA) A receptor-associated protein-like 2 | 61.89925 | 48.35992 | 46.30192 | 54.5936  | 58.66996 | 49.59387 |
| 17337513 | Gabbr1        | gamma-aminobutyric acid (GABA) B receptor, 1                        | 3.923986 | 6.669368 | 8.841799 | 6.337263 | 6.528674 | 8.81738  |
| 17425095 | Gabbr2        | gamma-aminobutyric acid (GABA) B receptor, 2                        | 56.51297 | 53.0485  | 69.4749  | 50.69284 | 72.82894 | 66.75667 |
| 17412579 | Gabbr1        | gamma-aminobutyric acid (GABA) C receptor, subunit rho 1            | 3.030845 | 3.372761 | 3.956542 | 3.652059 | 3.238779 | 3.372761 |
| 17412563 | Gabbr2        | gamma-aminobutyric acid (GABA) C receptor, subunit rho 2            | 5.724303 | 6.813188 | 5.724303 | 5.755256 | 6.046918 | 5.724303 |
| 17326453 | Gabbr3        | gamma-aminobutyric acid (GABA) C receptor, rho 3                    | 3.480996 | 3.146788 | 3.603678 | 3.014189 | 3.380766 | 3.425798 |
| 17251855 | Gabarap       | gamma-aminobutyric acid receptor associated protein                 | 536.1749 | 605.6666 | 648.2336 | 523.5197 | 611.7931 | 573.0471 |
| 17459634 | Ggcx          | gamma-glutamyl carboxylase                                          | 188.1605 | 198.1364 | 203.8325 | 178.2799 | 155.1554 | 141.9609 |
| 17467031 | Ggct          | gamma-glutamyl cyclotransferase                                     | 12.41722 | 17.46264 | 18.66133 | 17.88378 | 18.06506 | 18.38886 |
| 17412102 | Ggh           | gamma-glutamyl hydrolase                                            | 18.31673 | 25.26083 | 20.9615  | 18.63341 | 18.38542 | 17.69684 |
| 17309688 | Ggact         | gamma-glutamylamine cyclotransferase                                | 190.5017 | 152.3843 | 119.1554 | 141.1387 | 155.0318 | 115.7293 |
| 17234373 | Ggt1          | gamma-glutamyltransferase 1                                         | 5.06587  | 5.587218 | 5.617429 | 5.06587  | 5.159639 | 4.686887 |
| 17234403 | Ggt5          | gamma-glutamyltransferase 5                                         | 5.172099 | 6.65436  | 6.827086 | 7.733224 | 5.995832 | 6.943341 |
| 17252359 | Ggt6          | gamma-glutamyltransferase 6                                         | 25.81558 | 27.48266 | 38.14019 | 30.31164 | 34.48674 | 29.76118 |
| 17393264 | Ggt7          | gamma-glutamyltransferase 7                                         | 6.056902 | 6.763687 | 5.267798 | 6.460877 | 5.304843 | 5.883767 |
| 17435055 | Gsap          | gamma-secretase activating protein                                  | 36.43821 | 39.44006 | 36.65073 | 43.19463 | 50.54617 | 46.67118 |
| 17379247 | Gdap1l1       | ganglioside-induced differentiation-associated protein 1-like 1     | 11.34001 | 11.42443 | 10.34793 | 10.81236 | 9.137947 | 10.57063 |
| 17211294 | Gdap1         | ganglioside-induced differentiation-associated-protein 1            | 3.22867  | 3.009972 | 3.197823 | 2.832979 | 2.647077 | 3.533334 |
| 17274889 | Gdap10        | ganglioside-induced differentiation-associated-protein 10           | 21.18366 | 25.76981 | 24.27131 | 18.08912 | 26.46291 | 20.79291 |
| 17400966 | Gdap2         | ganglioside-induced differentiation-associated-protein 2            | 89.76369 | 59.56777 | 68.28468 | 70.86985 | 75.62703 | 52.05446 |
| 17233347 | Gja1          | gap junction protein, alpha 1                                       | 19.04262 | 20.45994 | 14.73965 | 19.5636  | 9.193091 | 13.85361 |
| 17423750 | Gja10         | gap junction protein, alpha 10                                      | 2.539756 | 2.580105 | 2.330582 | 2.84968  | 2.561751 | 2.823002 |
| 17307113 | Gja3          | gap junction protein, alpha 3                                       | 4.333912 | 5.745052 | 4.952957 | 5.006526 | 5.184015 | 4.735412 |
| 17430211 | Gja4          | gap junction protein, alpha 4                                       | 11.92916 | 13.25477 | 12.93824 | 12.32264 | 12.75517 | 15.43764 |
| 17400749 | Gja5          | gap junction protein, alpha 5                                       | 5.338965 | 5.338965 | 5.338965 | 5.338965 | 6.458683 | 4.870804 |
| 17545809 | Gja6          | gap junction protein, alpha 6                                       | 3.15745  | 3.193415 | 3.801582 | 3.149035 | 3.194987 | 2.791809 |
| 17408156 | Gja8          | gap junction protein, alpha 8                                       | 2.907219 | 4.513041 | 4.641625 | 4.252408 | 3.387099 | 4.15999  |
| 17536736 | Gjb1          | gap junction protein, beta 1                                        | 129.5037 | 122.9127 | 116.8521 | 127.7332 | 144.0884 | 126.1564 |

|          |               |                                                                  |          |          |          |          |          |          |
|----------|---------------|------------------------------------------------------------------|----------|----------|----------|----------|----------|----------|
| 17307117 | Gjb2          | gap junction protein, beta 2                                     | 214.3924 | 233.188  | 252.9643 | 208.4056 | 242.3738 | 200.6754 |
| 17430216 | Gjb3          | gap junction protein, beta 3                                     | 3.120052 | 4.040069 | 3.798974 | 4.217096 | 4.203118 | 4.293101 |
| 17430222 | Gjb4          | gap junction protein, beta 4                                     | 7.579906 | 7.229871 | 6.8385   | 7.674432 | 7.09784  | 9.20259  |
| 17430227 | Gjb5          | gap junction protein, beta 5                                     | 4.32461  | 5.758368 | 3.801714 | 4.287837 | 4.402796 | 4.251317 |
| 17307125 | Gjb6          | gap junction protein, beta 6                                     | 4.50529  | 3.883991 | 3.822377 | 3.4291   | 4.353694 | 3.702886 |
| 17389505 | Gjd2          | gap junction protein, delta 2                                    | 4.681043 | 4.460236 | 4.681043 | 4.681043 | 5.323297 | 5.226807 |
| 17268907 | Gjd3          | gap junction protein, delta 3                                    | 17.58362 | 24.25769 | 20.80358 | 27.25256 | 24.14379 | 21.87544 |
| 17352575 | Gjd4          | gap junction protein, delta 4                                    | 3.062691 | 3.904912 | 3.703322 | 3.930438 | 3.703322 | 3.703322 |
| 17239474 | Gje1          | gap junction protein, epsilon 1                                  | 2.839329 | 2.753373 | 3.562278 | 3.488967 | 2.98974  | 3.562031 |
| 17270315 | Gjc1          | gap junction protein, gamma 1                                    | 4.552819 | 4.296435 | 4.296435 | 4.296435 | 4.571634 | 4.65519  |
| 17263355 | Gjc2          | gap junction protein, gamma 2                                    | 6.63189  | 6.672743 | 6.970683 | 6.672743 | 5.758807 | 6.672743 |
| 17454209 | Gjc3          | gap junction protein, gamma 3                                    | 3.748387 | 4.866518 | 7.567937 | 4.92021  | 5.561947 | 5.235764 |
| 17410323 | Gar1          | GAR1 ribonucleoprotein homolog (yeast)                           | 24.23836 | 19.23911 | 23.53751 | 26.44036 | 21.96052 | 20.96339 |
| 17419483 | Fgr           | Gardner-Rasheed feline sarcoma viral (Fgr) oncogene homolog      | 7.856191 | 7.367065 | 8.959076 | 6.845519 | 8.201854 | 7.000122 |
| 17256101 | Gsdma         | gasdermin A                                                      | 5.782206 | 5.648744 | 9.667682 | 7.496307 | 4.009744 | 5.133455 |
| 17256082 | Gsdma2        | gasdermin A2                                                     | 4.299116 | 2.999891 | 4.993288 | 4.515701 | 3.230998 | 3.385878 |
| 17256069 | Gsdma3        | gasdermin A3                                                     | 2.489541 | 2.737464 | 2.661372 | 2.304206 | 2.49322  | 3.477547 |
| 17317428 | Gsdmc         | gasdermin C                                                      | 2.746378 | 2.787651 | 3.084913 | 2.225917 | 3.153032 | 2.620678 |
| 17317442 | Gsdmc2        | gasdermin C2                                                     | 2.133852 | 2.342875 | 2.365524 | 2.041925 | 2.120214 | 2.016929 |
| 17317458 | Gsdmc3        | gasdermin C3                                                     | 2.622731 | 2.328515 | 2.603821 | 3.61153  | 1.794535 | 3.143496 |
| 17317472 | Gsdmc4        | gasdermin C4                                                     | 2.677506 | 1.857253 | 2.481049 | 3.286678 | 3.263862 | 2.003274 |
| 17311878 | Gsdmcl1       | gasdermin C-like 1                                               | 13.16632 | 16.68604 | 13.32118 | 13.54746 | 16.55081 | 9.783835 |
| 17311885 | Gsdmcl2       | gasdermin C-like 2                                               | 5.506631 | 10.54794 | 8.469225 | 6.070057 | 11.9175  | 9.633767 |
| 17311893 | Gsdmcl-ps     | gasdermin C-like, pseudogene                                     | 3.978873 | 3.424801 | 3.98373  | 4.033633 | 2.645518 | 2.877109 |
| 17312280 | Gsdmd         | gasdermin D                                                      | 33.22414 | 35.79336 | 34.5468  | 38.5674  | 29.64034 | 28.73844 |
| 17311874 | 1700065116Rik | gasdermin pseudogene                                             | 2.572141 | 2.10643  | 2.528567 | 2.304206 | 2.467517 | 2.96403  |
| 17255487 | Gip           | gastric inhibitory polypeptide                                   | 22.62789 | 31.71361 | 26.49448 | 27.95472 | 26.49448 | 35.01133 |
| 17487170 | Gipr          | gastric inhibitory polypeptide receptor                          | 9.055285 | 9.018828 | 7.94843  | 9.574983 | 10.2556  | 10.29313 |
| 17357729 | Gif           | gastric intrinsic factor                                         | 5.065027 | 6.13405  | 5.437411 | 6.000114 | 5.996497 | 6.093875 |
| 17256357 | Gast          | gastrin                                                          | 21.74919 | 22.29456 | 27.29283 | 22.29456 | 22.29456 | 23.65691 |
| 17351396 | Grp           | gastrin releasing peptide                                        | 7.088498 | 8.016319 | 6.997939 | 8.538603 | 6.793335 | 7.450411 |
| 17545910 | Grpr          | gastrin releasing peptide receptor                               | 3.434095 | 4.141978 | 3.54956  | 3.498121 | 3.248334 | 3.813379 |
| 17468594 | Gkn1          | gastrokine 1                                                     | 8.195659 | 10.51728 | 8.38796  | 8.846274 | 9.504034 | 8.120058 |
| 17460538 | Gkn2          | gastrokine 2                                                     | 4.953678 | 4.938216 | 5.777919 | 4.722497 | 4.419153 | 5.308484 |
| 17468602 | Gkn3          | gastrokine 3                                                     | 3.805853 | 4.20927  | 3.990418 | 4.20927  | 4.844608 | 4.688154 |
| 17446213 | Gbx1          | gastrulation brain homeobox 1                                    | 4.457114 | 3.724689 | 4.20927  | 3.460331 | 4.116191 | 3.572614 |
| 17225373 | Gbx2          | gastrulation brain homeobox 2                                    | 9.361307 | 8.559165 | 11.19397 | 11.37678 | 9.141241 | 8.863829 |
| 17539966 | Gata1         | GATA binding protein 1                                           | 7.808687 | 6.898965 | 6.182713 | 6.592977 | 6.319673 | 6.314156 |
| 17460634 | Gata2         | GATA binding protein 2                                           | 5.65556  | 5.255981 | 6.484521 | 6.945459 | 6.537867 | 5.56106  |
| 17381533 | Gata3         | GATA binding protein 3                                           | 16.56447 | 12.2343  | 12.53708 | 14.67278 | 12.53708 | 11.72715 |
| 17307609 | Gata4         | GATA binding protein 4                                           | 35.87135 | 34.66697 | 30.11541 | 33.58558 | 25.86609 | 31.46552 |
| 17395629 | Gata5         | GATA binding protein 5                                           | 4.56043  | 5.451261 | 6.114735 | 5.061377 | 5.719781 | 5.145281 |
| 17380749 | Gata5os       | GATA binding protein 5, opposite strand                          | 7.137308 | 8.785169 | 8.623479 | 8.567237 | 7.798086 | 9.801619 |
| 17348400 | Gata6         | GATA binding protein 6                                           | 29.34332 | 36.94891 | 32.39771 | 32.39771 | 30.16555 | 36.41927 |
| 17445268 | Gatad1        | GATA zinc finger domain containing 1                             | 166.6722 | 155.8722 | 150.7224 | 149.8162 | 159.4323 | 158.4792 |
| 17509907 | Gatad2a       | GATA zinc finger domain containing 2A                            | 96.72521 | 91.60154 | 89.42151 | 92.47875 | 73.48154 | 79.88928 |
| 17399737 | Gatad2b       | GATA zinc finger domain containing 2B                            | 106.2059 | 125.4353 | 135.139  | 105.6149 | 115.4657 | 121.8202 |
| 17443069 | Gatsl2        | GATS protein-like 2                                              | 18.06218 | 19.29533 | 23.8279  | 19.29533 | 18.76731 | 15.89995 |
| 17246790 | Gatsl3        | GATS protein-like 3                                              | 9.340437 | 9.472925 | 10.27317 | 10.13996 | 8.260734 | 10.59873 |
| 17441202 | Gcn1l1        | GCN1 general control of amino-acid synthesis 1-like 1 (yeast)    | 42.56041 | 38.19521 | 41.98203 | 44.45396 | 44.45396 | 41.43305 |
| 17296142 | Gpbp1         | GC-rich promoter binding protein 1                               | 115.3281 | 102.0491 | 89.48103 | 93.25635 | 91.52348 | 104.6704 |
| 17417437 | Gpbp1l1       | GC-rich promoter binding protein 1-like 1                        | 75.42286 | 91.72417 | 83.50843 | 87.97795 | 91.11268 | 94.4874  |
| 17459801 | Gcfc2         | GC-rich sequence DNA binding factor 2                            | 8.547604 | 8.009654 | 7.491995 | 9.597975 | 11.99266 | 8.56694  |
| 17528902 | Gfral         | GNDF family receptor alpha like                                  | 3.053132 | 2.682039 | 2.470974 | 3.339611 | 2.905004 | 3.215226 |
| 17377360 | Gzf1          | GNDF-inducible zinc finger protein 1                             | 39.56108 | 45.08045 | 42.81249 | 37.80984 | 44.89802 | 53.36049 |
| 17479516 | Gdpgp1        | GDP-D-glucose phosphorylase 1                                    | 13.91839 | 11.80233 | 12.23193 | 16.44697 | 11.61462 | 11.79791 |
| 17291653 | Gmcs          | GDP-mannose 4, 6-dehydratase                                     | 10.6005  | 10.3868  | 12.74863 | 10.02041 | 7.855374 | 9.674586 |
| 17214543 | Gmppa         | GDP-mannose pyrophosphorylase A                                  | 69.92323 | 57.40323 | 59.72612 | 57.09371 | 52.74199 | 45.99069 |
| 17521603 | Gmppb         | GDP-mannose pyrophosphorylase B                                  | 21.35645 | 10.07508 | 11.59604 | 15.74269 | 14.20542 | 12.58166 |
| 17370209 | Gsn           | gelsolin                                                         | 37.56169 | 35.88179 | 33.19836 | 33.35659 | 30.56122 | 34.55853 |
| 17275689 | Gemin2        | gem (nuclear organelle) associated protein 2                     | 10.65486 | 9.263453 | 9.094095 | 9.736478 | 9.840625 | 11.08295 |
| 17266074 | Gemin4        | gem (nuclear organelle) associated protein 4                     | 28.01699 | 27.18672 | 28.57477 | 28.59875 | 28.70341 | 28.70301 |
| 17263089 | Gemin5        | gem (nuclear organelle) associated protein 5                     | 35.30572 | 29.78492 | 29.74963 | 34.47216 | 27.33145 | 32.74131 |
| 17339928 | Gemin6        | gem (nuclear organelle) associated protein 6                     | 5.930649 | 5.031121 | 6.453447 | 8.623539 | 5.979729 | 6.672003 |
| 17487291 | Gemin7        | gem (nuclear organelle) associated protein 7                     | 17.09864 | 15.17001 | 17.49172 | 15.25775 | 18.6453  | 14.5692  |
| 17539600 | Gemin8        | gem (nuclear organelle) associated protein 8                     | 2.699646 | 2.661335 | 2.661335 | 2.475552 | 2.906595 | 3.148839 |
| 17539099 | 4930503H13Rik | gem (nuclear organelle) associated protein 8 pseudogene          | 6.010729 | 3.613633 | 4.185471 | 3.458101 | 3.743584 | 3.724586 |
| 17316185 | LOC105245899  | gem-associated protein 4-like                                    | 3.836923 | 3.347212 | 4.247135 | 3.706686 | 3.697295 | 3.677384 |
| 17291343 | Gmn           | geminin                                                          | 10.50162 | 9.15481  | 6.855301 | 9.951679 | 9.924126 | 10.35848 |
| 17329500 | Gmnc          | geminin coiled-coil domain containing                            | 6.037076 | 4.893172 | 5.608403 | 5.079372 | 5.783008 | 6.550704 |
| 17501721 | Gmip          | Gem-interacting protein                                          | 7.922908 | 9.894385 | 8.523051 | 8.523051 | 7.980394 | 9.310251 |
| 17279962 | Gen1          | Gen homolog 1, endonuclease (Drosophila)                         | 4.016392 | 3.721773 | 4.172176 | 4.088354 | 3.892319 | 4.880808 |
| 17280086 | Greb1         | gene regulated by estrogen in breast cancer protein              | 4.20927  | 4.20927  | 4.670348 | 4.068678 | 4.349381 | 4.046768 |
| 17470820 | Grccl0        | gene rich cluster, C10 gene                                      | 46.75958 | 49.93536 | 49.36101 | 46.93851 | 50.08407 | 41.85796 |
| 17469684 | Gt(ROSA)26Sor | gene trap ROSA 26, Philippe Soriano                              | 18.84657 | 17.64833 | 18.87441 | 20.56701 | 16.68708 | 19.8334  |
| 17283014 | Gtf2a1        | general transcription factor II A, 1                             | 80.29398 | 77.51803 | 74.74421 | 81.54079 | 84.90808 | 86.98049 |
| 17519009 | Gtf2a2        | general transcription factor II A, 2                             | 40.65836 | 45.62776 | 52.09453 | 49.46067 | 57.14598 | 55.27135 |
| 17330306 | Gtf2e1        | general transcription factor II E, polypeptide 1 (alpha subunit) | 29.6313  | 26.45448 | 21.51051 | 32.60949 | 23.00762 | 30.9801  |
| 17500496 | Gtf2e2        | general transcription factor II E, polypeptide 2 (beta subunit)  | 30.40781 | 31.08529 | 27.79378 | 25.68742 | 34.35147 | 26.66342 |
| 17478201 | Gtf2h1        | general transcription factor II H, polypeptide 1                 | 71.89203 | 69.49465 | 69.49465 | 67.08229 | 67.07624 | 61.36482 |
| 17295646 | Gtf2h2        | general transcription factor II H, polypeptide 2                 | 6.171709 | 5.69478  | 6.004733 | 6.27763  | 6.214636 | 6.543851 |
| 17295649 | Gtf2h2        | general transcription factor II H, polypeptide 2                 | 22.53976 | 19.61316 | 20.20555 | 24.25029 | 22.93009 | 25.42825 |
| 17344387 | Gtf2h4        | general transcription factor II H, polypeptide 4                 | 19.42873 | 20.17505 | 19.42873 | 24.12759 | 22.17259 | 17.05615 |
| 17453304 | Gtf2i         | general transcription factor II I                                | 102.5803 | 107.8491 | 111.5425 | 100.2348 | 95.51994 | 90.55359 |

|          |               |                                                                     |          |          |          |          |          |          |
|----------|---------------|---------------------------------------------------------------------|----------|----------|----------|----------|----------|----------|
| 17453347 | Gtf2ird1      | general transcription factor II I repeat domain-containing 1        | 34.24663 | 33.70428 | 30.12439 | 32.10264 | 25.73126 | 26.37648 |
| 17340366 | Gtf2a1l       | general transcription factor IIA, 1-like                            | 5.338965 | 6.231373 | 5.690321 | 6.048553 | 4.829621 | 3.978294 |
| 17403301 | Gtf2b         | general transcription factor IIB                                    | 64.86058 | 64.74694 | 60.16906 | 62.67986 | 73.45252 | 57.66524 |
| 17346412 | Gtf2f1        | general transcription factor IIF, polypeptide 1                     | 77.49385 | 56.93919 | 65.01001 | 52.85324 | 53.96417 | 42.07088 |
| 17308734 | Gtf2f2        | general transcription factor IIF, polypeptide 2                     | 39.45866 | 21.2603  | 24.12555 | 28.4923  | 32.53205 | 23.29454 |
| 17442553 | Gtf2h3        | general transcription factor IIH, polypeptide 3                     | 37.01146 | 28.24845 | 31.90034 | 34.72277 | 40.23781 | 28.66285 |
| 17332851 | Gtf2h5        | general transcription factor IIH, polypeptide 5                     | 72.98054 | 77.35271 | 65.02849 | 67.70263 | 71.95435 | 71.45485 |
| 17444813 | Gtf3a         | general transcription factor III A                                  | 40.32129 | 37.99032 | 42.29455 | 42.26408 | 48.97997 | 43.25275 |
| 17496063 | Gtf3c1        | general transcription factor III C 1                                | 80.96632 | 76.8722  | 80.69459 | 83.87913 | 84.8969  | 70.5718  |
| 17446853 | Gtf3c2        | general transcription factor III C, polypeptide 2, beta             | 64.06169 | 79.20832 | 69.37192 | 66.11474 | 72.5649  | 68.40501 |
| 17223117 | Gtf3c3        | general transcription factor III C, polypeptide 3                   | 39.89456 | 31.09455 | 30.68603 | 35.43541 | 31.50044 | 37.70856 |
| 17383430 | Gtf3c4        | general transcription factor III C, polypeptide 4                   | 27.94387 | 28.32472 | 28.21851 | 28.21851 | 31.27049 | 29.50321 |
| 17383395 | Gtf3c5        | general transcription factor III C, polypeptide 5                   | 8.302351 | 10.42915 | 10.29392 | 10.92211 | 10.52049 | 10.92181 |
| 17240357 | Gtf3c6        | general transcription factor III C, polypeptide 6, alpha            | 45.53424 | 36.20809 | 29.22599 | 34.13098 | 36.20809 | 36.20809 |
| 17506249 | Gse1          | genetic suppressor element 1                                        | 23.68087 | 32.33512 | 32.33512 | 34.38578 | 31.96099 | 31.40081 |
| 17276674 | Gphn          | gephyrin                                                            | 192.0143 | 159.366  | 144.9217 | 203.5952 | 154.0847 | 194.5275 |
| 17290729 | Ggps1         | geranylgeranyl diphosphate synthase 1                               | 18.67    | 27.86283 | 21.24807 | 24.82032 | 20.55033 | 22.17066 |
| 17468532 | Gmcl1         | germ cell-less homolog 1 (Drosophila)                               | 27.17974 | 28.12751 | 22.73054 | 27.65196 | 28.16614 | 25.32675 |
| 17533939 | Gmcl1l        | germ cell-less homolog 1 (Drosophila)-like                          | 32.23844 | 32.49014 | 26.52517 | 26.99013 | 35.97867 | 43.53096 |
| 17532718 | Gm5925        | germ cell-less homolog 1 family pseudogene                          | 5.690873 | 5.593417 | 4.486001 | 5.735543 | 6.478636 | 5.469542 |
| 17472073 | Gsg1          | germ cell-specific gene 1                                           | 5.82307  | 4.844138 | 4.844138 | 5.455192 | 5.781485 | 4.844138 |
| 17265724 | Gsg2          | germ cell-specific gene 2                                           | 4.040461 | 3.237006 | 4.647678 | 4.389236 | 3.729055 | 3.192043 |
| 17325979 | Gcsam         | germinal center associated, signaling and motility                  | 6.918216 | 5.101212 | 4.937669 | 4.801649 | 4.811144 | 3.579058 |
| 17507559 | Grtp1         | GH regulated TBC protein 1                                          | 35.83382 | 34.56907 | 31.54764 | 31.6109  | 34.31815 | 39.5844  |
| 17296979 | Ghdc          | GH3 domain containing                                               | 37.46548 | 34.62783 | 34.62783 | 38.0789  | 31.88111 | 33.75385 |
| 17469797 | Ghrl          | ghrelin                                                             | 5.611825 | 7.698994 | 6.532567 | 6.921429 | 6.371796 | 8.866963 |
| 17505953 | Gan           | giant axonal neuropathy                                             | 12.70117 | 18.54065 | 14.54539 | 17.14933 | 14.68692 | 13.65891 |
| 17548650 | Gan           | giant axonal neuropathy                                             | 7.791548 | 10.04371 | 12.41223 | 11.27957 | 9.403579 | 10.05841 |
| 17250365 | Gid4          | GID complex subunit 4, VID24 homolog (S. cerevisiae)                | 60.99377 | 43.40713 | 41.41496 | 53.70223 | 50.80082 | 61.82421 |
| 17380840 | Gid8          | GID complex subunit 8 homolog (S. cerevisiae)                       | 32.18909 | 40.07332 | 41.94625 | 37.45977 | 43.42277 | 46.49456 |
| 17402705 | Gimd1         | GIMAP family P-loop NTPase domain containing 1                      | 9.64312  | 9.078349 | 9.259601 | 6.270628 | 8.061454 | 9.243121 |
| 17377525 | Gins1         | GINS complex subunit 1 (Psf1 homolog)                               | 3.462322 | 4.31829  | 4.31829  | 4.220225 | 5.222027 | 4.077769 |
| 17513525 | Gins2         | GINS complex subunit 2 (Psf2 homolog)                               | 9.065019 | 10.38162 | 6.818716 | 9.461638 | 9.286404 | 9.286404 |
| 17504321 | Gins3         | GINS complex subunit 3 (Psf3 homolog)                               | 11.80315 | 11.67945 | 11.87273 | 8.833223 | 9.293229 | 11.84577 |
| 17508151 | Gins4         | GINS complex subunit 4 (Slf5 homolog)                               | 35.45581 | 36.02783 | 31.38232 | 39.04403 | 36.8318  | 39.71632 |
| 17502962 | Gipc1         | GIPC PDZ domain containing family, member 1                         | 35.15237 | 30.21996 | 41.37794 | 44.03412 | 40.16119 | 47.52616 |
| 17411174 | Gipc2         | GIPC PDZ domain containing family, member 2                         | 5.599197 | 5.901329 | 6.204694 | 6.687097 | 5.705012 | 5.191639 |
| 17243278 | Gipc3         | GIPC PDZ domain containing family, member 3                         | 6.378026 | 7.212803 | 10.00778 | 7.802249 | 8.631014 | 8.631014 |
| 17368981 | Gle1          | GLE1 RNA export mediator (yeast)                                    | 92.76058 | 99.57972 | 107.9081 | 96.49752 | 94.87    | 93.80936 |
| 17537144 | 4933401B06Rik | GLE1 RNA export mediator pseudogene                                 | 2.324435 | 2.711535 | 2.969891 | 3.076031 | 4.008271 | 3.002096 |
| 17244949 | Glipr1        | GLI pathogenesis-related 1 (glioma)                                 | 5.780603 | 5.780603 | 5.780603 | 5.859794 | 6.954998 | 5.368355 |
| 17237298 | Glipr11       | GLI pathogenesis-related 1 like 1                                   | 3.091142 | 3.973416 | 4.725674 | 3.652439 | 3.245026 | 4.138879 |
| 17237305 | Glipr12       | GLI pathogenesis-related 1 like 2                                   | 2.671389 | 2.803307 | 3.110378 | 2.375646 | 2.803307 | 2.750626 |
| 17244961 | Glipr13       | GLI pathogenesis-related 1 like 3                                   | 2.350732 | 2.341106 | 2.056327 | 1.980878 | 1.998199 | 2.547037 |
| 17413500 | Glipr2        | GLI pathogenesis-related 2                                          | 6.6278   | 5.337041 | 4.372566 | 4.82942  | 3.996896 | 5.609919 |
| 17305727 | Gmfb          | glia maturation factor, beta                                        | 69.81766 | 69.54573 | 68.11544 | 65.29542 | 51.94849 | 59.59296 |
| 17475839 | Gmfg          | glia maturation factor, gamma                                       | 12.18074 | 10.54794 | 9.731148 | 13.05509 | 7.553839 | 7.943418 |
| 17310072 | Gdnf          | glial cell line derived neurotrophic factor                         | 4.955017 | 5.306351 | 4.770201 | 4.370142 | 5.527434 | 3.883318 |
| 17365960 | Gfra1         | glial cell line derived neurotrophic factor family receptor alpha 1 | 229.4554 | 226.535  | 237.7432 | 245.5563 | 276.3265 | 204.787  |
| 17301823 | Gfra2         | glial cell line derived neurotrophic factor family receptor alpha 2 | 15.28622 | 16.61506 | 24.78714 | 12.46439 | 8.673414 | 12.47052 |
| 17353509 | Gfra3         | glial cell line derived neurotrophic factor family receptor alpha 3 | 5.061623 | 4.977806 | 5.220182 | 4.897549 | 4.450724 | 4.987338 |
| 17391792 | Gfra4         | glial cell line derived neurotrophic factor family receptor alpha 4 | 8.329327 | 7.785556 | 9.78241  | 8.152034 | 7.839491 | 8.498098 |
| 17519610 | Gcm1          | glial cells missing homolog 1 (Drosophila)                          | 4.144419 | 3.732184 | 4.312098 | 4.123044 | 3.476535 | 4.230652 |
| 17292050 | Gcm2          | glial cells missing homolog 2 (Drosophila)                          | 8.123323 | 6.11554  | 5.617429 | 7.337202 | 5.370029 | 6.020069 |
| 17270354 | Gfap          | glial fibrillary acidic protein                                     | 11.6463  | 12.43591 | 10.27139 | 8.827837 | 9.741473 | 11.49975 |
| 17245874 | Gli1          | GLI-Kruppel family member GLI1                                      | 7.356655 | 9.838716 | 9.389055 | 8.418423 | 8.606818 | 8.328577 |
| 17226170 | Gli2          | GLI-Kruppel family member GLI2                                      | 4.395204 | 6.287864 | 5.48933  | 5.621636 | 8.004049 | 5.52958  |
| 17285414 | Gli3          | GLI-Kruppel family member GLI3                                      | 3.755825 | 4.079324 | 3.339703 | 3.703322 | 5.120306 | 4.959381 |
| 17442909 | Gbas          | glioblastoma amplified sequence                                     | 49.72502 | 42.87932 | 51.84777 | 47.09461 | 35.50598 | 47.56307 |
| 17486818 | Gltscr1       | glioma tumor suppressor candidate region gene 1                     | 11.21859 | 11.95656 | 11.56249 | 12.96302 | 7.659393 | 8.515257 |
| 17486790 | Gltscr2       | glioma tumor suppressor candidate region gene 2                     | 65.29542 | 68.31971 | 66.39902 | 65.91066 | 77.13587 | 66.32634 |
| 17517368 | Gldn          | gliomedin                                                           | 12.84994 | 10.16064 | 9.101157 | 13.40686 | 11.12297 | 8.58162  |
| 17527206 | Gldnos        | gliomedin, opposite strand                                          | 3.37854  | 3.974601 | 3.708408 | 3.73459  | 3.192839 | 3.777731 |
| 17416506 | Glis1         | GLIS family zinc finger 1                                           | 6.231805 | 8.582572 | 6.027042 | 6.887212 | 9.270647 | 8.331291 |
| 17322525 | Glis2         | GLIS family zinc finger 2                                           | 10.4974  | 12.02596 | 12.21439 | 14.07829 | 12.39959 | 11.58969 |
| 17363727 | Glis3         | GLIS family zinc finger 3                                           | 4.488552 | 4.972116 | 4.309708 | 6.486994 | 4.34188  | 4.86861  |
| 17368674 | Gbgt1         | globoside alpha-1,3-N-acetylgalactosaminyltransferase 1             | 15.63124 | 15.62073 | 14.6744  | 12.63943 | 13.91395 | 19.18185 |
| 17450645 | Glmn          | glomulin, FKBP associated protein                                   | 5.669769 | 5.669769 | 5.77836  | 5.636033 | 6.234354 | 5.709206 |
| 17345593 | Gltscr1l      | GLTSCR1-like                                                        | 33.15903 | 41.58784 | 45.89452 | 34.35909 | 37.06203 | 39.62777 |
| 17385757 | Gcg           | glucagon                                                            | 4.320625 | 6.116007 | 7.47892  | 4.903086 | 6.017107 | 6.041807 |
| 17259401 | Gcgr          | glucagon receptor                                                   | 108.7597 | 116.81   | 123.1276 | 131.5147 | 136.7607 | 130.5004 |
| 17335726 | Glp1r         | glucagon-like peptide 1 receptor                                    | 8.673114 | 9.647265 | 10.28472 | 9.651613 | 9.647265 | 8.978348 |
| 17264342 | Glp2r         | glucagon-like peptide 2 receptor                                    | 3.080255 | 2.914907 | 3.080255 | 3.753327 | 3.052476 | 3.35497  |
| 17326567 | Gbe1          | glucan (1,4-alpha-), branching enzyme 1                             | 185.9189 | 171.1657 | 149.2906 | 153.6773 | 173.973  | 173.2474 |
| 17456001 | Glccl1        | glucocorticoid induced transcript 1                                 | 17.93406 | 21.66524 | 19.58653 | 19.56008 | 22.19573 | 18.33947 |
| 17430777 | Gmbe1         | glucocorticoid modulatory element binding protein 1                 | 9.401624 | 12.99919 | 13.31573 | 13.5765  | 13.73029 | 10.06162 |
| 17395830 | Gmbe2         | glucocorticoid modulatory element binding protein 2                 | 28.55517 | 40.78142 | 38.61046 | 41.12746 | 40.52134 | 38.78481 |
| 17260244 | Gck           | glucokinase                                                         | 35.7242  | 32.69572 | 28.87182 | 31.09973 | 37.68974 | 38.73619 |
| 17436107 | Gckr          | glucokinase regulatory protein                                      | 149.3289 | 210.088  | 192.41   | 202.1959 | 241.3579 | 259.5089 |
| 17237715 | Gns           | glucosamine (N-acetyl)-6-sulfatase                                  | 350.7793 | 352.7715 | 352.505  | 304.5257 | 343.5342 | 311.3126 |
| 17424822 | Gne           | glucosamine (UDP-N-acetyl)-2-epimerase/N-acetylmannosamine kinase   | 183.4165 | 202.1973 | 198.0869 | 224.1561 | 213.6462 | 203.7251 |
| 17353948 | Gnpda1        | glucosamine-6-phosphate deaminase 1                                 | 43.3536  | 32.58396 | 38.10425 | 36.45943 | 23.9161  | 39.6888  |
| 17355665 | Gm2176        | glucosamine-6-phosphate deaminase 1 pseudogene                      | 4.576929 | 4.898873 | 4.223708 | 4.651706 | 4.576929 | 4.20927  |
| 17455492 | Gm8615        | glucosamine-6-phosphate deaminase 1 pseudogene                      | 4.212539 | 5.108359 | 5.005347 | 4.106844 | 3.263862 | 4.392493 |

|          |          |                                                                                    |          |          |          |          |          |          |
|----------|----------|------------------------------------------------------------------------------------|----------|----------|----------|----------|----------|----------|
| 17448543 | Gnpda2   | glucosamine-6-phosphate deaminase 2                                                | 4.163798 | 5.300432 | 4.438032 | 5.803527 | 5.300432 | 5.480054 |
| 17305653 | Gnpnat1  | glucosamine-phosphate N-acetyltransferase 1                                        | 29.29454 | 36.52899 | 32.05706 | 36.49457 | 39.8023  | 43.34068 |
| 17363320 | Gcnt1    | glucosaminyl (N-acetyl) transferase 1, core 2                                      | 5.338965 | 5.349893 | 5.626041 | 3.947475 | 6.556791 | 5.787659 |
| 17286707 | Gcnt2    | glucosaminyl (N-acetyl) transferase 2, I-branching enzyme                          | 24.74748 | 33.49445 | 32.55709 | 33.30692 | 30.51147 | 30.5627  |
| 17528562 | Gcnt3    | glucosaminyl (N-acetyl) transferase 3, mucin type                                  | 5.034784 | 4.237138 | 4.249255 | 4.184195 | 4.837226 | 3.160231 |
| 17289324 | Gcnt4    | glucosaminyl (N-acetyl) transferase 4, core 2 (beta-1,6-N-acetylglucosaminyltransf | 21.20923 | 19.89177 | 17.20541 | 19.43197 | 15.76354 | 17.12296 |
| 17395032 | Gcnt7    | glucosaminyl (N-acetyl) transferase family member 7                                | 12.87848 | 10.7766  | 12.28665 | 11.91569 | 11.78753 | 11.60408 |
| 17256896 | G6pc3    | glucose 6 phosphatase, catalytic, 3                                                | 8.497391 | 15.64392 | 16.69055 | 13.53375 | 14.57324 | 17.18217 |
| 17489620 | Gpi1     | glucose phosphate isomerase 1                                                      | 438.3532 | 414.9403 | 520.3577 | 392.3507 | 461.453  | 410.2644 |
| 17256707 | G6pc     | glucose-6-phosphatase, catalytic                                                   | 1026.516 | 1090.875 | 648.764  | 927.2535 | 757.2574 | 914.2406 |
| 17371410 | G6pc2    | glucose-6-phosphatase, catalytic, 2                                                | 3.380766 | 3.787485 | 3.846457 | 3.886361 | 3.729055 | 2.897282 |
| 17437570 | G6pd2    | glucose-6-phosphate dehydrogenase 2                                                | 3.229364 | 3.99903  | 3.741508 | 3.611204 | 3.635264 | 4.942497 |
| 17542695 | G6pdx    | glucose-6-phosphate dehydrogenase X-linked                                         | 10.57342 | 16.07314 | 12.53708 | 11.50086 | 10.66299 | 15.96732 |
| 17292117 | Gfod1    | glucose-fructose oxidoreductase domain containing 1                                | 10.77384 | 7.728026 | 7.541544 | 7.876747 | 6.515564 | 7.48312  |
| 17512502 | Gfod2    | glucose-fructose oxidoreductase domain containing 2                                | 11.26878 | 11.58688 | 13.09505 | 12.17762 | 9.405144 | 12.2904  |
| 17424742 | Gba2     | glucosidase beta 2                                                                 | 14.63763 | 18.40901 | 15.25288 | 18.68813 | 17.50166 | 21.79069 |
| 17258994 | Gaa      | glucosidase, alpha, acid                                                           | 104.4277 | 121.985  | 117.8477 | 102.38   | 93.44205 | 94.50901 |
| 17375006 | Ganc     | glucosidase, alpha; neutral C                                                      | 30.49329 | 32.01797 | 37.95374 | 39.19207 | 35.05212 | 43.44355 |
| 17399333 | Gba      | glucosidase, beta, acid                                                            | 52.99521 | 47.60727 | 50.95317 | 44.78364 | 42.69455 | 38.65063 |
| 17320693 | Gxylt1   | glucoside xylosyltransferase 1                                                     | 12.78624 | 13.78206 | 10.07432 | 15.43239 | 15.86186 | 17.83835 |
| 17461166 | Gxylt2   | glucoside xylosyltransferase 2                                                     | 13.33328 | 10.46398 | 10.25532 | 11.60987 | 9.821273 | 10.33209 |
| 17453160 | Gusb     | glucuronidase, beta                                                                | 47.69546 | 43.89851 | 46.38704 | 42.65284 | 45.04047 | 39.01643 |
| 17527977 | Glce     | glucuronyl C5-epimerase                                                            | 63.96097 | 69.45131 | 62.16971 | 61.51004 | 63.96097 | 56.21565 |
| 17371636 | Gad1     | glutamate decarboxylase 1                                                          | 9.593385 | 11.44361 | 6.287864 | 9.299544 | 11.17211 | 13.13715 |
| 17386340 | Gad1os   | glutamate decarboxylase 1, opposite strand                                         | 14.51658 | 13.15884 | 12.75526 | 14.82253 | 11.51115 | 19.45555 |
| 17236892 | Gad1-ps  | glutamate decarboxylase 1, pseudogene [Source:MGI Symbol;Acc:MGI:95633]            | 3.661767 | 3.094551 | 3.300123 | 3.330687 | 2.672407 | 3.630731 |
| 17522818 | Gad1l    | glutamate decarboxylase-like 1                                                     | 11.53311 | 12.73812 | 9.341861 | 13.88437 | 10.0266  | 11.24366 |
| 17298805 | Glud1    | glutamate dehydrogenase 1                                                          | 1592.602 | 1464.152 | 1297.051 | 1239.326 | 1459.795 | 1399.921 |
| 17237608 | Grip1    | glutamate receptor interacting protein 1                                           | 12.11162 | 12.03955 | 12.11162 | 13.00694 | 12.45083 | 12.17838 |
| 17245374 | Grip1os1 | glutamate receptor interacting protein 1, opposite strand 1                        | 4.360822 | 5.212878 | 4.610618 | 4.816349 | 4.172552 | 5.785614 |
| 17245370 | Grip1os2 | glutamate receptor interacting protein 1, opposite strand 2                        | 6.801203 | 7.885925 | 7.667945 | 7.237693 | 7.935109 | 8.262567 |
| 17469059 | Grip2    | glutamate receptor interacting protein 2                                           | 9.659711 | 9.053025 | 10.1567  | 9.606827 | 10.30448 | 9.905227 |
| 17425255 | Grin3a   | glutamate receptor ionotropic, NMDA3A                                              | 3.733555 | 3.720664 | 3.720664 | 3.397162 | 5.467268 | 3.578562 |
| 17249863 | Gria1    | glutamate receptor, ionotropic, AMPA1 (alpha 1)                                    | 4.872155 | 5.173892 | 5.091639 | 5.747721 | 5.72589  | 6.347815 |
| 17406145 | Gria2    | glutamate receptor, ionotropic, AMPA2 (alpha 2)                                    | 4.081615 | 3.556332 | 3.703322 | 3.723373 | 3.870634 | 3.729055 |
| 17534385 | Gria3    | glutamate receptor, ionotropic, AMPA3 (alpha 3)                                    | 6.345835 | 7.445558 | 8.642867 | 6.577002 | 8.702923 | 7.774662 |
| 17523705 | Gria4    | glutamate receptor, ionotropic, AMPA4 (alpha 4)                                    | 4.420992 | 3.843392 | 3.913908 | 3.849337 | 3.843392 | 3.706275 |
| 17298874 | Grid1    | glutamate receptor, ionotropic, delta 1                                            | 4.408995 | 3.939848 | 4.522906 | 4.20927  | 5.652817 | 3.626631 |
| 17459126 | Grid2    | glutamate receptor, ionotropic, delta 2                                            | 3.071748 | 2.908691 | 2.774043 | 2.924804 | 3.260922 | 3.585633 |
| 17444309 | Grid2ip  | glutamate receptor, ionotropic, delta 2 (Grid2) interacting protein 1              | 4.75462  | 6.7788   | 5.404084 | 6.510959 | 5.565649 | 5.638377 |
| 17331802 | Grik1    | glutamate receptor, ionotropic, kainate 1                                          | 3.585017 | 3.382336 | 3.083716 | 3.662884 | 2.981276 | 3.1065   |
| 17240693 | Grik2    | glutamate receptor, ionotropic, kainate 2 (beta 2)                                 | 4.45094  | 4.985092 | 4.266846 | 4.520712 | 4.378662 | 4.514136 |
| 17418465 | Grik3    | glutamate receptor, ionotropic, kainate 3                                          | 5.549008 | 5.647295 | 4.691405 | 4.424026 | 5.115694 | 5.66643  |
| 17526008 | Grik4    | glutamate receptor, ionotropic, kainate 4                                          | 6.639893 | 6.261985 | 6.31385  | 6.200566 | 5.976704 | 6.678712 |
| 17487833 | Grik5    | glutamate receptor, ionotropic, kainate 5 (gamma 2)                                | 17.49135 | 20.10399 | 22.2663  | 19.52066 | 19.62866 | 21.44204 |
| 17382496 | Grin1    | glutamate receptor, ionotropic, NMDA1 (zeta 1)                                     | 7.975251 | 8.700872 | 10.03251 | 11.03313 | 9.715175 | 11.88047 |
| 17367921 | Grin1os  | glutamate receptor, ionotropic, NMDA1 (zeta 1), opposite strand                    | 8.524292 | 7.935109 | 7.990579 | 7.935109 | 7.935109 | 9.310251 |
| 17328046 | Grin2a   | glutamate receptor, ionotropic, NMDA2A (epsilon 1)                                 | 4.509289 | 5.163359 | 5.486401 | 5.667097 | 5.46688  | 5.466775 |
| 17472089 | Grin2b   | glutamate receptor, ionotropic, NMDA2B (epsilon 2)                                 | 6.218428 | 4.555912 | 4.471132 | 4.255003 | 4.067719 | 4.44308  |
| 17271803 | Grin2c   | glutamate receptor, ionotropic, NMDA2C (epsilon 3)                                 | 8.53109  | 7.199466 | 7.325717 | 6.707755 | 5.976786 | 6.378115 |
| 17490995 | Grin2d   | glutamate receptor, ionotropic, NMDA2D (epsilon 4)                                 | 4.432621 | 6.799459 | 6.799459 | 6.439149 | 6.318578 | 8.125069 |
| 17235065 | Grin3b   | glutamate receptor, ionotropic, NMDA3B                                             | 8.438637 | 10.50402 | 12.04389 | 11.00029 | 6.743091 | 9.649405 |
| 17312341 | Grina    | glutamate receptor, ionotropic, N-methyl D-aspartate-associated protein 1 (glutan  | 274.3607 | 322.0029 | 360.7236 | 297.1299 | 204.8338 | 200.0033 |
| 17239234 | Grm1     | glutamate receptor, metabotropic 1                                                 | 5.613848 | 4.801649 | 4.006715 | 4.579944 | 4.96337  | 5.144568 |
| 17530733 | Grm2     | glutamate receptor, metabotropic 2                                                 | 6.091173 | 6.070393 | 5.837983 | 5.51022  | 5.335376 | 6.347815 |
| 17445596 | Grm3     | glutamate receptor, metabotropic 3                                                 | 3.432287 | 4.06214  | 3.064072 | 3.39469  | 2.95046  | 2.809941 |
| 17342719 | Grm4     | glutamate receptor, metabotropic 4                                                 | 9.364682 | 7.232528 | 8.78663  | 7.212953 | 5.345889 | 5.803246 |
| 17480002 | Grm5     | glutamate receptor, metabotropic 5                                                 | 2.807722 | 4.015139 | 3.287475 | 2.91317  | 3.54091  | 3.143583 |
| 17249234 | Grm6     | glutamate receptor, metabotropic 6                                                 | 7.690887 | 7.438285 | 7.225262 | 6.043733 | 7.082752 | 7.672092 |
| 17461448 | Grm7     | glutamate receptor, metabotropic 7                                                 | 4.230241 | 4.23382  | 4.0443   | 3.523282 | 4.664718 | 3.656542 |
| 17465272 | Grm8     | glutamate receptor, metabotropic 8                                                 | 3.05989  | 2.946618 | 2.989781 | 3.255412 | 2.989781 | 3.104412 |
| 17507682 | Erich1   | glutamate rich 1                                                                   | 12.77667 | 15.13273 | 15.37016 | 18.26171 | 13.54623 | 16.19493 |
| 17371621 | Erich2   | glutamate rich 2                                                                   | 3.520011 | 3.54506  | 3.520011 | 4.522875 | 4.501544 | 3.431692 |
| 17386344 | Erich2os | glutamate rich 2, opposite strand [Source:MGI Symbol;Acc:MGI:3826593]              | 3.781897 | 3.274217 | 3.140664 | 3.274739 | 3.140643 | 4.306721 |
| 17403790 | Erich3   | glutamate rich 3                                                                   | 5.149385 | 5.723152 | 6.958084 | 5.515685 | 5.247317 | 5.477699 |
| 17403806 | Erich3   | glutamate rich 3                                                                   | 3.364962 | 3.479814 | 3.708305 | 3.908811 | 3.863799 | 4.209941 |
| 17487977 | Erich4   | glutamate rich 4                                                                   | 3.951965 | 3.506253 | 4.088014 | 5.069839 | 4.352065 | 3.76923  |
| 17310944 | Erich5   | glutamate rich 5                                                                   | 14.66576 | 16.80874 | 15.70988 | 17.07898 | 17.05213 | 16.80874 |
| 17405420 | Erich6   | glutamate rich 6                                                                   | 2.780723 | 3.362397 | 3.362397 | 3.362397 | 3.19326  | 4.245457 |
| 17302035 | Erich6b  | glutamate rich 6B                                                                  | 4.886969 | 4.886969 | 4.886969 | 4.23162  | 6.543216 | 5.304328 |
| 17218349 | Glul     | glutamate-ammonia ligase (glutamine synthetase)                                    | 1171.645 | 1186.659 | 1187.63  | 1329.336 | 1000.996 | 984.6656 |
| 17519579 | Gclc     | glutamate-cysteine ligase, catalytic subunit                                       | 762.5246 | 681.6371 | 467.7844 | 541.6436 | 468.4723 | 648.7101 |
| 17402283 | Gclm     | glutamate-cysteine ligase, modifier subunit                                        | 490.7961 | 461.789  | 401.5679 | 390.2054 | 360.4861 | 322.2843 |
| 17490984 | Grwd1    | glutamate-rich WD repeat containing 1                                              | 18.37    | 20.17714 | 18.592   | 19.14545 | 19.75396 | 17.29652 |
| 17512103 | Got2     | glutamic-oxaloacetic transaminase 2, mitochondrial                                 | 1131.86  | 1140.183 | 1051.272 | 1075.32  | 1054.717 | 1095.33  |
| 17367510 | Gad2     | glutamic acid decarboxylase 2                                                      | 5.313012 | 5.933363 | 5.768555 | 7.404385 | 6.385148 | 6.385148 |
| 17503446 | Gpt2     | glutamic pyruvate transaminase (alanine aminotransferase) 2                        | 311.181  | 470.3041 | 521.0002 | 471.0806 | 512.7565 | 474.0154 |
| 17312567 | Gpt      | glutamic pyruvic transaminase, soluble                                             | 140.7323 | 160.7885 | 159.4566 | 187.3367 | 194.8351 | 251.1786 |
| 17364932 | Got1     | glutamic-oxaloacetic transaminase 1, soluble                                       | 288.3905 | 554.9138 | 645.7357 | 543.7426 | 635.3202 | 749.7106 |
| 17508532 | Got1l1   | glutamic-oxaloacetic transaminase 1-like 1                                         | 3.887439 | 4.129823 | 3.434095 | 3.692838 | 3.492597 | 3.355715 |
| 17222880 | Gls      | glutaminase                                                                        | 14.49567 | 16.18595 | 14.40912 | 11.67273 | 17.52084 | 15.70509 |
| 17238295 | Gls2     | glutaminase 2 (liver, mitochondrial)                                               | 322.8343 | 371.8482 | 445.691  | 443.5491 | 428.5115 | 501.6614 |
| 17388985 | Qser1    | glutamine and serine rich 1                                                        | 48.96809 | 59.58676 | 53.73797 | 52.74199 | 56.47263 | 49.89073 |
| 17460506 | Gfpt1    | glutamine fructose-6-phosphate transaminase 1                                      | 78.87138 | 36.58119 | 45.00614 | 34.1653  | 45.04984 | 39.56766 |

|          |               |                                                               |          |          |          |          |          |          |
|----------|---------------|---------------------------------------------------------------|----------|----------|----------|----------|----------|----------|
| 17249036 | Gfpt2         | glutamine fructose-6-phosphate transaminase 2                 | 4.92369  | 4.449675 | 5.10054  | 6.25435  | 5.10054  | 5.042328 |
| 17225356 | Glrp1         | glutamine repeat protein 1                                    | 2.674242 | 3.444561 | 2.567065 | 2.851043 | 3.918197 | 2.772121 |
| 17272375 | Qrich2        | glutamine rich 2                                              | 4.970324 | 5.301057 | 5.301057 | 5.627679 | 6.56434  | 5.301057 |
| 17521825 | Qrich1        | glutamine-rich 1                                              | 84.72113 | 89.96114 | 88.83461 | 85.62024 | 81.8948  | 80.17441 |
| 17339876 | Qpct          | glutaminyl-peptide cyclotransferase (glutaminyl cyclase)      | 33.34203 | 36.48749 | 41.95439 | 30.98397 | 27.70146 | 23.19336 |
| 17487161 | Qpctl         | glutaminyl-peptide cyclotransferase-like                      | 26.55387 | 25.86053 | 25.86053 | 19.76382 | 20.56644 | 20.77203 |
| 17240608 | Qrs1          | glutaminyl-tRNA synthase (glutamine-hydrolyzing)-like 1       | 12.23261 | 15.12769 | 11.86138 | 12.91065 | 13.51838 | 9.91938  |
| 17521794 | Qars          | glutaminyl-tRNA synthetase                                    | 68.72485 | 60.91772 | 52.89099 | 53.71191 | 55.09311 | 62.80772 |
| 17410251 | Enpep         | glutamyl aminopeptidase                                       | 150.9221 | 140.4731 | 142.9047 | 115.9565 | 135.7774 | 141.5276 |
| 17220548 | Eprrs         | glutamyl-prolyl-tRNA synthetase                               | 169.102  | 133.6726 | 134.7041 | 135.2064 | 168.3897 | 158.4013 |
| 17495909 | Ears2         | glutamyl-tRNA synthetase 2 (mitochondrial)(putative)          | 17.94239 | 21.13394 | 23.89472 | 19.24991 | 18.44503 | 21.73458 |
| 17398611 | Gatb          | glutamyl-tRNA(Gln) amidotransferase, subunit B                | 48.843   | 48.55305 | 46.59005 | 44.94504 | 43.90551 | 45.45415 |
| 17451721 | Gatc          | glutamyl-tRNA(Gln) amidotransferase, subunit C                | 194.7825 | 187.909  | 201.2633 | 177.0766 | 120.7308 | 117.3448 |
| 17288716 | GlrX          | glutaredoxin                                                  | 104.3618 | 150.2238 | 208.5732 | 182.3088 | 118.1946 | 110.6961 |
| 17218013 | GlrX2         | glutaredoxin 2 (thioltransferase)                             | 11.44266 | 10.29149 | 11.6317  | 11.50086 | 8.785291 | 10.94098 |
| 17484282 | GlrX3         | glutaredoxin 3                                                | 29.03478 | 33.24211 | 38.58264 | 35.74352 | 34.00583 | 49.52654 |
| 17427181 | Gm12669       | glutaredoxin 3 pseudogene                                     | 15.44374 | 10.79821 | 10.84968 | 10.45456 | 6.992896 | 8.092021 |
| 17278345 | GlrX5         | glutaredoxin 5 homolog (S. cerevisiae)                        | 150.2801 | 179.6531 | 167.5851 | 185.2988 | 156.7314 | 157.9309 |
| 17437989 | Grxc1         | glutaredoxin, cysteine rich 1                                 | 2.571161 | 2.611394 | 2.799676 | 2.588614 | 3.26047  | 2.770008 |
| 17354023 | Grxc2         | glutaredoxin, cysteine rich 2                                 | 6.185971 | 6.419051 | 6.093242 | 6.169827 | 5.557014 | 7.238396 |
| 17511196 | Gcdh          | glutaryl-Coenzyme A dehydrogenase                             | 746.8993 | 801.5452 | 783.8968 | 757.3572 | 718.5626 | 839.8803 |
| 17521681 | Gpx1          | glutathione peroxidase 1                                      | 1669.534 | 1801.309 | 1452.769 | 1740.927 | 1476.945 | 1589.944 |
| 17282069 | Gpx2          | glutathione peroxidase 2                                      | 4.089799 | 3.170829 | 4.085209 | 3.895558 | 3.765522 | 3.573406 |
| 17480673 | Gpx2-ps1      | glutathione peroxidase 2, pseudogene 1                        | 3.000348 | 4.007937 | 3.767219 | 3.558428 | 3.017722 | 3.53674  |
| 17249787 | Gpx3          | glutathione peroxidase 3                                      | 17.53627 | 19.06296 | 30.63906 | 18.57023 | 12.9171  | 13.74419 |
| 17235166 | Gpx4          | glutathione peroxidase 4                                      | 101.1211 | 105.2415 | 106.9239 | 105.4401 | 110.216  | 104.3611 |
| 17290913 | Gpx5          | glutathione peroxidase 5                                      | 3.133641 | 3.688643 | 2.554711 | 3.339703 | 2.953468 | 3.281624 |
| 17285631 | Gpx6          | glutathione peroxidase 6                                      | 5.103015 | 5.28235  | 5.27613  | 7.275316 | 6.616279 | 13.95616 |
| 17428054 | Gpx7          | glutathione peroxidase 7                                      | 11.27441 | 11.34308 | 10.95358 | 11.34308 | 9.22603  | 10.36257 |
| 17296281 | Gpx8          | glutathione peroxidase 8 (putative)                           | 11.06514 | 12.16066 | 10.72749 | 12.94201 | 11.93701 | 13.42723 |
| 17500478 | Gsr           | glutathione reductase                                         | 168.4165 | 178.4208 | 174.1564 | 161.2539 | 134.1804 | 143.9616 |
| 17457876 | Gstk1         | glutathione S-transferase kappa 1                             | 545.4261 | 524.8386 | 457.7259 | 533.1915 | 446.9687 | 533.5538 |
| 17451839 | Gstm2-ps1     | glutathione S-transferase mu 2 (muscle), pseudogene 1         | 49.07819 | 52.79575 | 48.16656 | 43.93291 | 29.98814 | 45.29438 |
| 17360216 | Gsto1         | glutathione S-transferase omega 1                             | 188.1435 | 203.5388 | 200.2488 | 203.6206 | 163.7068 | 196.78   |
| 17360225 | Gsto2         | glutathione S-transferase omega 2                             | 3.4335   | 4.20927  | 3.218526 | 4.465526 | 3.936627 | 5.438203 |
| 17519658 | Gsta1         | glutathione S-transferase, alpha 1 (Ya)                       | 47.0046  | 53.88941 | 38.48942 | 37.57419 | 26.05918 | 44.17322 |
| 17529017 | Gsta2         | glutathione S-transferase, alpha 2 (Yc2)                      | 2.723648 | 3.110745 | 3.208169 | 2.967072 | 3.192419 | 3.179478 |
| 17211405 | Gsta3         | glutathione S-transferase, alpha 3                            | 321.8289 | 391.1993 | 357.5621 | 361.7828 | 310.5389 | 385.426  |
| 17519649 | Gsta4         | glutathione S-transferase, alpha 4                            | 210.4422 | 292.7043 | 230.6274 | 218.4577 | 117.6331 | 204.5841 |
| 17410455 | Gstcd         | glutathione S-transferase, C-terminal domain containing       | 6.707848 | 6.191075 | 7.073332 | 6.943774 | 6.72871  | 6.373253 |
| 17409154 | Gstm1         | glutathione S-transferase, mu 1                               | 150.851  | 206.6793 | 207.5449 | 175.2244 | 140.8621 | 174.5032 |
| 17409142 | Gstm2         | glutathione S-transferase, mu 2                               | 46.91411 | 51.7641  | 57.07472 | 52.09453 | 46.04492 | 56.36118 |
| 17409130 | Gstm3         | glutathione S-transferase, mu 3                               | 97.1741  | 160.1112 | 183.2171 | 117.5418 | 85.22058 | 102.6152 |
| 17409172 | Gstm4         | glutathione S-transferase, mu 4                               | 34.8269  | 38.96157 | 37.26269 | 44.73152 | 26.44403 | 34.90883 |
| 17401610 | Gstm5         | glutathione S-transferase, mu 5                               | 19.41366 | 31.80166 | 29.18004 | 30.38253 | 29.32705 | 26.43193 |
| 17409113 | Gstm6         | glutathione S-transferase, mu 6                               | 14.77207 | 14.90175 | 13.78264 | 13.37243 | 11.69768 | 12.54178 |
| 17409099 | Gstm7         | glutathione S-transferase, mu 7                               | 59.34399 | 70.39544 | 64.41121 | 81.18662 | 72.13562 | 76.4275  |
| 17361073 | Gstp1         | glutathione S-transferase, pi 1                               | 1361.999 | 1262.038 | 851.1089 | 1343.76  | 788.0045 | 701.5198 |
| 17361081 | Gstp2         | glutathione S-transferase, pi 2                               | 1030.244 | 877.1015 | 608.8361 | 996.7653 | 538.8239 | 476.1459 |
| 17241934 | Gstt1         | glutathione S-transferase, theta 1                            | 180.4268 | 221.5487 | 236.2204 | 218.1263 | 221.833  | 254.378  |
| 17241954 | Gstt2         | glutathione S-transferase, theta 2                            | 67.50582 | 107.8573 | 94.22709 | 89.48413 | 71.42415 | 93.22403 |
| 17241921 | Gstt3         | glutathione S-transferase, theta 3                            | 28.94455 | 41.77101 | 64.0102  | 44.19006 | 31.81025 | 46.19645 |
| 17241946 | Gstt4         | glutathione S-transferase, theta 4                            | 3.501177 | 4.100046 | 4.692771 | 6.416782 | 5.311171 | 6.347815 |
| 17393288 | Gss           | glutathione synthetase                                        | 123.6879 | 113.3311 | 107.1799 | 104.5805 | 110.2275 | 100.9327 |
| 17277592 | Gztz1         | glutathione transferase zeta 1 (maleylacetoacetate isomerase) | 695.7571 | 662.9931 | 630.5994 | 672.5697 | 716.6426 | 731.3611 |
| 17260881 | Gapdh         | glyceraldehyde-3-phosphate dehydrogenase                      | 2168.933 | 2497.052 | 2770.576 | 2335.394 | 2227.207 | 2288.394 |
| 17310462 | Gapdh         | glyceraldehyde-3-phosphate dehydrogenase                      | 2024.107 | 2343.29  | 2633.124 | 2147.973 | 2112.873 | 2156.117 |
| 17427183 | Gapdh         | glyceraldehyde-3-phosphate dehydrogenase                      | 2919.468 | 3235.65  | 3677.17  | 3115.461 | 3025.945 | 3161.339 |
| 17439361 | Gapdh         | glyceraldehyde-3-phosphate dehydrogenase                      | 1463.848 | 1674.843 | 1848.193 | 1552.234 | 1477.538 | 1519.731 |
| 17471011 | Gapdh         | glyceraldehyde-3-phosphate dehydrogenase                      | 4.801816 | 3.913502 | 6.166364 | 5.146744 | 3.417521 | 5.005451 |
| 17478474 | Gapdh         | glyceraldehyde-3-phosphate dehydrogenase                      | 2919.468 | 3235.65  | 3677.17  | 3115.461 | 3025.945 | 3161.339 |
| 17531480 | 3000002C10Rik | glyceraldehyde-3-phosphate dehydrogenase pseudogene           | 41.71892 | 65.00866 | 65.94219 | 53.87672 | 49.5523  | 48.93009 |
| 17423189 | 4930448K20Rik | glyceraldehyde-3-phosphate dehydrogenase pseudogene           | 1.809599 | 2.207678 | 2.32545  | 2.135376 | 2.260481 | 2.591217 |
| 17509180 | Gm10313       | glyceraldehyde-3-phosphate dehydrogenase pseudogene           | 161.6993 | 188.8268 | 211.2445 | 170.9701 | 173.4998 | 183.8672 |
| 17247924 | Gm12070       | glyceraldehyde-3-phosphate dehydrogenase pseudogene           | 3.741742 | 3.151918 | 2.720855 | 3.064603 | 2.782767 | 2.513609 |
| 17230451 | Gm5069        | glyceraldehyde-3-phosphate dehydrogenase pseudogene           | 3.822006 | 3.565193 | 4.476807 | 5.229562 | 4.051399 | 3.943099 |
| 17231613 | Gm5177        | glyceraldehyde-3-phosphate dehydrogenase pseudogene           | 2.924926 | 2.74952  | 2.796554 | 2.749787 | 2.934409 | 2.772178 |
| 17221373 | Gm5523        | glyceraldehyde-3-phosphate dehydrogenase pseudogene           | 65.71086 | 74.89357 | 71.72529 | 81.22771 | 58.42322 | 63.72643 |
| 17299414 | Gm6498        | glyceraldehyde-3-phosphate dehydrogenase pseudogene           | 4.406735 | 5.275727 | 6.051698 | 4.289264 | 4.974909 | 4.928129 |
| 17527013 | Gm6981        | glyceraldehyde-3-phosphate dehydrogenase pseudogene           | 115.1994 | 111.7081 | 124.8628 | 115.5065 | 87.77694 | 115.9694 |
| 17232727 | Gm8055        | glyceraldehyde-3-phosphate dehydrogenase pseudogene           | 40.08221 | 49.92118 | 51.43398 | 47.66704 | 42.95547 | 47.18381 |
| 17239917 | Gm8709        | glyceraldehyde-3-phosphate dehydrogenase pseudogene           | 5.58323  | 6.457474 | 6.457474 | 7.464005 | 6.084337 | 9.291104 |
| 17233037 | Gm9034        | glyceraldehyde-3-phosphate dehydrogenase pseudogene           | 4.01461  | 3.170411 | 4.20927  | 3.305755 | 3.342204 | 3.354808 |
| 17546512 | Gapdh-ps15    | glyceraldehyde-3-phosphate dehydrogenase, pseudogene 15       | 163.361  | 217.3626 | 255.4753 | 202.7123 | 179.7901 | 183.9245 |
| 17489289 | Gapdhs        | glyceraldehyde-3-phosphate dehydrogenase, spermatogenic       | 4.513573 | 10.29863 | 5.023629 | 5.420177 | 6.270976 | 5.21006  |
| 17530623 | Glyctk        | glycerate kinase                                              | 202.8346 | 194.1018 | 180.2556 | 200.1045 | 201.4461 | 178.7327 |
| 17543045 | Gk            | glycerol kinase                                               | 171.8338 | 185.6022 | 197.6905 | 155.9425 | 140.5978 | 151.0152 |
| 17449935 | Gk2           | glycerol kinase 2                                             | 3.751714 | 3.222052 | 3.414772 | 3.751714 | 3.729055 | 3.28866  |
| 17520537 | Gk5           | glycerol kinase 5 (putative)                                  | 2.506128 | 2.800336 | 3.009972 | 3.009972 | 3.106478 | 3.138967 |
| 17350586 | Gykl1         | glycerol kinase-like 1                                        | 3.17646  | 3.499091 | 3.34958  | 3.636927 | 3.377931 | 3.842379 |
| 17370897 | Gpd2          | glycerol phosphate dehydrogenase 2, mitochondrial             | 65.29452 | 74.21146 | 62.03885 | 65.29452 | 65.29452 | 63.36306 |
| 17375885 | Gpat2         | glycerol-3-phosphate acyltransferase 2, mitochondrial         | 4.76911  | 6.191333 | 6.287864 | 6.287864 | 5.147529 | 6.467284 |
| 17508134 | Gpat4         | glycerol-3-phosphate acyltransferase 4                        | 199.1608 | 269.1003 | 232.2718 | 250.8029 | 239.1265 | 271.5135 |
| 17365728 | Gpam          | glycerol-3-phosphate acyltransferase, mitochondrial           | 470.6497 | 347.9606 | 399.9345 | 345.6313 | 369.6792 | 334.1148 |

|          |               |                                                                            |          |          |          |          |          |          |
|----------|---------------|----------------------------------------------------------------------------|----------|----------|----------|----------|----------|----------|
| 17314888 | Gpd1          | glycerol-3-phosphate dehydrogenase 1 (soluble)                             | 641.8089 | 593.6505 | 477.5076 | 593.0418 | 459.9075 | 433.9455 |
| 17531939 | Gpd1l         | glycerol-3-phosphate dehydrogenase 1-like                                  | 25.96111 | 33.49445 | 36.03558 | 36.03558 | 37.59633 | 36.03558 |
| 17435419 | 1700022A21Rik | glycerol-3-phosphate dehydrogenase 1-like pseudogene                       | 4.392128 | 3.702321 | 4.748066 | 4.087702 | 4.545157 | 4.54185  |
| 17506824 | Gnpat         | glyceronephosphate O-acyltransferase                                       | 69.6678  | 77.99934 | 71.25997 | 70.02606 | 64.04349 | 68.30882 |
| 17391997 | Gpcpd1        | glycerophosphocholine phosphodiesterase GDE1 homolog (S. cerevisiae)       | 65.60573 | 164.8831 | 143.5839 | 240.5495 | 168.8549 | 207.9251 |
| 17495586 | Gde1          | glycerophosphodiester phosphodiesterase 1                                  | 102.0272 | 107.1108 | 116.5116 | 101.4665 | 94.44418 | 97.27317 |
| 17267430 | Gdpd1         | glycerophosphodiester phosphodiesterase domain containing 1                | 11.31339 | 12.21879 | 11.12243 | 13.38393 | 11.49967 | 11.12243 |
| 17276743 | Gdpd1         | glycerophosphodiester phosphodiesterase domain containing 1                | 3.286792 | 5.831876 | 4.777381 | 4.979842 | 3.797658 | 4.527642 |
| 17536600 | Gdpd2         | glycerophosphodiester phosphodiesterase domain containing 2                | 5.264111 | 6.605922 | 6.044823 | 5.554434 | 5.636541 | 6.827181 |
| 17483098 | Gdpd3         | glycerophosphodiester phosphodiesterase domain containing 3                | 4.67673  | 4.773608 | 4.076384 | 5.216745 | 5.844826 | 5.422657 |
| 17480439 | Gdpd4         | glycerophosphodiester phosphodiesterase domain containing 4                | 4.516734 | 4.051286 | 4.004688 | 3.712652 | 4.457825 | 3.796263 |
| 17480534 | Gdpd5         | glycerophosphodiester phosphodiesterase domain containing 5                | 5.918986 | 6.137538 | 4.943113 | 5.499689 | 3.691891 | 6.331863 |
| 17390810 | Gatm          | glycine amidinotransferase (L-arginine:glycine amidinotransferase)         | 17.30096 | 15.40119 | 14.9538  | 11.66577 | 11.77382 | 12.533   |
| 17312884 | Gcat          | glycine C-acetyltransferase (2-amino-3-ketobutyrate-coenzyme A ligase)     | 67.82005 | 43.58138 | 50.28025 | 46.96975 | 49.82611 | 50.65771 |
| 17513325 | Gcsh          | glycine cleavage system protein H (aminomethyl carrier)                    | 34.54536 | 35.79782 | 26.84348 | 32.86796 | 41.67961 | 41.29113 |
| 17301852 | Gm9199        | glycine cleavage system protein H (aminomethyl carrier) pseudogene         | 141.5669 | 130.4624 | 151.7381 | 141.5669 | 160.5279 | 137.9326 |
| 17363865 | Gldc          | glycine decarboxylase                                                      | 365.2372 | 252.7295 | 242.028  | 323.2866 | 261.856  | 291.7381 |
| 17345562 | Gnmt          | glycine N-methyltransferase                                                | 920.5485 | 842.0138 | 876.1961 | 1059.494 | 1171.377 | 1188.462 |
| 17263011 | Glr1a         | glycine receptor, alpha 1 subunit                                          | 4.924202 | 3.227932 | 3.45355  | 3.670941 | 3.406806 | 4.554649 |
| 17546001 | Glr2          | glycine receptor, alpha 2 subunit                                          | 3.316749 | 2.797252 | 2.797465 | 2.637608 | 3.083631 | 2.637608 |
| 17501234 | Glr3          | glycine receptor, alpha 3 subunit                                          | 2.946455 | 2.682373 | 2.996794 | 3.068982 | 3.035049 | 2.87669  |
| 17544768 | Glr4          | glycine receptor, alpha 4 subunit                                          | 3.266012 | 4.117276 | 4.551462 | 3.220132 | 3.713681 | 4.20927  |
| 17406165 | Glr6          | glycine receptor, beta subunit                                             | 2.870595 | 2.278525 | 2.326837 | 2.501009 | 2.04812  | 2.238357 |
| 17431266 | Grrp1         | glycine/arginine rich protein 1                                            | 11.31355 | 11.31355 | 10.76749 | 12.66873 | 10.24203 | 11.42989 |
| 17357837 | Glyat         | glycine-N-acyltransferase                                                  | 92.0943  | 74.68983 | 70.62172 | 80.69738 | 70.57768 | 68.50322 |
| 17344982 | Glyat13       | glycine-N-acyltransferase-like 3                                           | 3.429266 | 2.932904 | 2.953407 | 3.10325  | 3.729055 | 2.953407 |
| 17477811 | Gys1          | glycogen synthase 1, muscle                                                | 11.8659  | 14.89339 | 14.94717 | 15.06971 | 14.86142 | 14.70434 |
| 17472497 | Gys2          | glycogen synthase 2                                                        | 319.4885 | 432.2224 | 433.741  | 371.2996 | 368.0276 | 524.0607 |
| 17487884 | Gsk3a         | glycogen synthase kinase 3 alpha                                           | 104.2476 | 118.1078 | 132.9122 | 107.0136 | 96.04509 | 94.83384 |
| 17325560 | Gsk3b         | glycogen synthase kinase 3 beta                                            | 110.3613 | 120.9192 | 108.0429 | 106.8942 | 92.89442 | 90.0541  |
| 17404329 | Gyg           | glycogenin                                                                 | 17.36632 | 21.38237 | 21.88196 | 16.58055 | 20.97036 | 12.52093 |
| 17451568 | Glt1p         | glycolipid transfer protein                                                | 29.75665 | 31.75892 | 39.58577 | 31.863   | 31.49236 | 30.16471 |
| 17252065 | Glt1p2        | glycolipid transfer protein domain containing 2                            | 132.6104 | 118.2282 | 112.225  | 115.1444 | 106.0624 | 105.4818 |
| 17502789 | Gypa          | glycophorin A                                                              | 3.748621 | 5.360175 | 11.65308 | 5.621987 | 4.140572 | 3.149494 |
| 17353337 | Gypc          | glycophorin C                                                              | 7.764268 | 8.108415 | 9.065459 | 9.199912 | 5.47121  | 6.221619 |
| 17458439 | Gpnmb         | glycoprotein (transmembrane) nmb                                           | 8.666263 | 13.01145 | 20.5864  | 10.11462 | 10.42735 | 8.483561 |
| 17252165 | Gp1ba         | glycoprotein 1b, alpha polypeptide                                         | 4.392493 | 4.372929 | 4.966984 | 4.392493 | 3.681924 | 5.290375 |
| 17495622 | Gp2           | glycoprotein 2 (zymogen granule membrane)                                  | 3.703322 | 3.729649 | 3.703322 | 3.703322 | 3.566008 | 4.012552 |
| 17329636 | Gp5           | glycoprotein 5 (platelet)                                                  | 6.844523 | 6.251143 | 6.287864 | 6.287864 | 6.942378 | 6.474595 |
| 17485713 | Gp6           | glycoprotein 6 (platelet)                                                  | 3.721051 | 5.361587 | 5.487123 | 5.396784 | 5.665173 | 6.318491 |
| 17460569 | Gp9           | glycoprotein 9 (platelet)                                                  | 15.67453 | 20.76152 | 25.56114 | 20.76152 | 20.76152 | 18.97358 |
| 17219039 | Gpa33         | glycoprotein A33 (transmembrane)                                           | 7.75405  | 7.14503  | 6.508703 | 6.121096 | 5.787058 | 6.903892 |
| 17384484 | Ggta1         | glycoprotein galactosyltransferase alpha 1, 3                              | 9.330213 | 9.614288 | 11.02472 | 10.09935 | 9.271868 | 10.94659 |
| 17356685 | Gpha2         | glycoprotein hormone alpha 2                                               | 14.46024 | 16.43079 | 10.47429 | 12.99919 | 12.15712 | 15.6216  |
| 17281941 | Gphb5         | glycoprotein hormone beta 5                                                | 7.870689 | 7.204359 | 7.34234  | 8.561123 | 8.786204 | 7.204359 |
| 17412681 | Gga           | glycoprotein hormones, alpha subunit                                       | 4.925056 | 5.139685 | 5.60273  | 6.013396 | 5.480813 | 6.347815 |
| 17328958 | Gp1bb         | glycoprotein 1b, beta polypeptide                                          | 10.21721 | 9.750053 | 9.630762 | 8.830836 | 7.216053 | 6.352965 |
| 17239077 | Ginm1         | glycoprotein integral membrane 1                                           | 96.43801 | 79.38695 | 77.08616 | 88.23811 | 79.61675 | 74.44949 |
| 17501191 | Gpm6a         | glycoprotein m6a                                                           | 11.36748 | 10.20186 | 9.111698 | 12.36834 | 6.030928 | 10.20186 |
| 17539611 | Gpm6b         | glycoprotein m6b                                                           | 5.539977 | 4.536816 | 5.21982  | 4.881079 | 4.179963 | 5.057379 |
| 17399033 | Glmp          | glycosylated lysosomal membrane protein                                    | 105.0913 | 98.97347 | 117.8526 | 94.57323 | 92.74837 | 84.03043 |
| 17322437 | Glycam1       | glycosylation dependent cell adhesion molecule 1                           | 6.215326 | 6.215326 | 5.617429 | 6.624034 | 5.142429 | 6.384174 |
| 17318036 | Gml           | glycosylphosphatidylinositol anchored molecule like                        | 4.77854  | 4.783312 | 5.42044  | 3.596017 | 4.206995 | 4.047048 |
| 17312260 | Gml2          | glycosylphosphatidylinositol anchored molecule like 2                      | 6.380768 | 8.652818 | 6.160041 | 6.637178 | 6.924165 | 4.052662 |
| 17286055 | Gpld1         | glycosylphosphatidylinositol specific phospholipase D1                     | 233.3886 | 232.2766 | 231.3014 | 275.8117 | 308.3959 | 245.0717 |
| 17442780 | Glt1d1        | glycosyltransferase 1 domain containing 1                                  | 30.66668 | 64.83316 | 68.56973 | 66.06938 | 78.23867 | 87.15491 |
| 17406423 | Glt2d2        | glycosyltransferase 28 domain containing 2                                 | 5.556244 | 6.01423  | 4.272735 | 5.440314 | 5.14835  | 5.447597 |
| 17382755 | Glt6d1        | glycosyltransferase 6 domain containing 1                                  | 3.970388 | 3.661894 | 4.019288 | 3.723373 | 4.50807  | 3.703322 |
| 17298312 | Glt8d1        | glycosyltransferase 8 domain containing 1                                  | 23.88677 | 15.53413 | 17.93269 | 18.40671 | 21.75492 | 19.08636 |
| 17243493 | Glt8d2        | glycosyltransferase 8 domain containing 2                                  | 2.757594 | 3.324483 | 3.24098  | 4.6569   | 3.484158 | 2.606909 |
| 17388353 | Gylt1b        | glycosyltransferase-like 1B                                                | 10.23664 | 6.74281  | 8.917875 | 6.121308 | 6.87443  | 5.866459 |
| 17384927 | Gtdc1         | glycosyltransferase-like domain containing 1                               | 19.23737 | 16.2878  | 19.13325 | 18.78202 | 18.53654 | 20.44194 |
| 17458771 | Gars          | glycyl-tRNA synthetase                                                     | 108.7099 | 86.25104 | 91.58885 | 93.59438 | 104.14   | 86.80643 |
| 17343143 | Glo1          | glyoxalase 1                                                               | 496.2145 | 415.1129 | 332.6774 | 369.1619 | 361.2866 | 368.1934 |
| 17266079 | Glod4         | glyoxalase domain containing 4                                             | 62.1542  | 57.09451 | 56.90368 | 56.79689 | 63.94679 | 55.73841 |
| 17539979 | Glod5         | glyoxalase domain containing 5                                             | 3.802057 | 4.695439 | 4.43674  | 4.627555 | 4.960309 | 5.120057 |
| 17327889 | Glyr1         | glyoxylate reductase 1 homolog (Arabidopsis)                               | 120.6555 | 118.5112 | 116.156  | 109.8697 | 114.349  | 107.1568 |
| 17413573 | Grhpr         | glyoxylate reductase/hydroxypyruvate reductase                             | 400.5532 | 430.7808 | 424.3439 | 422.2928 | 432.969  | 350.3687 |
| 17215820 | Gpc1          | glypican 1                                                                 | 49.3504  | 51.20242 | 52.18741 | 41.78201 | 34.31577 | 48.09417 |
| 17454310 | Gpc2          | glypican 2 (cerebroglycan)                                                 | 6.686216 | 6.544759 | 6.995756 | 6.544033 | 8.529434 | 5.882135 |
| 17541681 | Gpc3          | glypican 3                                                                 | 6.42319  | 5.936777 | 5.311282 | 5.674212 | 5.489139 | 5.494583 |
| 17541668 | Gpc4          | glypican 4                                                                 | 76.67052 | 50.37269 | 58.16059 | 69.45083 | 90.84845 | 69.66103 |
| 17302645 | Gpc5          | glypican 5                                                                 | 7.814481 | 8.569316 | 7.527548 | 8.51685  | 7.261462 | 9.134274 |
| 17302656 | Gpc6          | glypican 6                                                                 | 10.83142 | 11.04307 | 14.65763 | 8.95231  | 10.83142 | 10.62823 |
| 17249801 | Gm2a          | GM2 ganglioside activator protein                                          | 224.713  | 197.7865 | 231.5227 | 220.9123 | 205.1677 | 169.9292 |
| 17536240 | 1700003E24Rik | Gm5941 pseudogene                                                          | 6.403186 | 5.775397 | 6.464819 | 5.618442 | 5.653914 | 6.36513  |
| 17543126 | 1700084M14Rik | Gm5941 pseudogene                                                          | 2.189908 | 2.074768 | 1.646006 | 1.909705 | 1.985992 | 1.865006 |
| 17536215 | LOC101055749  | Gm5941 pseudogene                                                          | 1.989988 | 2.527463 | 1.969528 | 2.247218 | 2.216956 | 2.294834 |
| 17380306 | Gnas          | GNAS (guanine nucleotide binding protein, alpha stimulating) complex locus | 9.2528   | 10.18215 | 10.83915 | 9.873626 | 8.162154 | 8.883326 |
| 17513031 | Glg1          | golgi apparatus protein 1                                                  | 67.18513 | 64.59453 | 65.62347 | 63.7441  | 62.68985 | 64.26049 |
| 17240800 | Gopc          | golgi associated PDZ and coiled-coil motif containing                      | 71.59912 | 55.35724 | 48.59311 | 51.57857 | 62.86216 | 63.72952 |
| 17312780 | Gga1          | golgi associated, gamma adaptin ear containing, ARF binding protein 1      | 34.61367 | 31.23821 | 40.77068 | 28.86942 | 31.47948 | 32.37751 |
| 17495890 | Gga2          | golgi associated, gamma adaptin ear containing, ARF binding protein 2      | 26.44238 | 26.76118 | 29.17054 | 25.38    | 23.8279  | 23.99713 |
| 17271938 | Gga3          | golgi associated, gamma adaptin ear containing, ARF binding protein 3      | 7.07397  | 8.038799 | 7.049349 | 6.299206 | 6.744587 | 6.688951 |

|          |               |                                                               |          |          |          |          |          |          |
|----------|---------------|---------------------------------------------------------------|----------|----------|----------|----------|----------|----------|
| 17384753 | Golga1        | golgi autoantigen, golgin subfamily a, 1                      | 41.11378 | 26.67118 | 26.65252 | 31.18888 | 28.9241  | 30.0887  |
| 17369747 | Golga2        | golgi autoantigen, golgin subfamily a, 2                      | 32.70547 | 31.33254 | 31.9395  | 32.62283 | 34.21128 | 33.62494 |
| 17440409 | Golga3        | golgi autoantigen, golgin subfamily a, 3                      | 62.67682 | 55.13513 | 53.1803  | 55.24263 | 62.93105 | 62.57958 |
| 17522887 | Golga4        | golgi autoantigen, golgin subfamily a, 4                      | 93.97792 | 87.54907 | 96.82784 | 92.04516 | 104.3705 | 93.79896 |
| 17278073 | Golga5        | golgi autoantigen, golgin subfamily a, 5                      | 78.33309 | 60.7259  | 58.52495 | 62.36091 | 64.90735 | 63.03626 |
| 17508161 | Golga7        | golgi autoantigen, golgin subfamily a, 7                      | 101.5432 | 118.0914 | 129.5307 | 106.9046 | 119.4084 | 119.5243 |
| 17359552 | Golga7b       | golgi autoantigen, golgin subfamily a, 7B                     | 5.386134 | 5.347261 | 5.126059 | 5.670437 | 4.409332 | 6.313106 |
| 17325410 | Golgb1        | golgi autoantigen, golgin subfamily b, macrogolgin 1          | 50.6844  | 38.75687 | 5.420169 | 44.43301 | 48.373   | 47.38144 |
| 17465310 | Gcc1          | golgi coiled coil 1                                           | 18.32816 | 17.4399  | 15.37367 | 19.90446 | 17.69684 | 17.82426 |
| 17406002 | Golim4        | golgi integral membrane protein 4                             | 118.6872 | 125.0698 | 121.8059 | 114.7357 | 119.6179 | 118.2208 |
| 17293237 | Golm1         | golgi membrane protein 1                                      | 11.83494 | 21.01387 | 16.10269 | 17.20886 | 15.42983 | 15.42983 |
| 17310452 | Golph3        | golgi phosphoprotein 3                                        | 158.229  | 131.563  | 139.9609 | 132.7069 | 122.428  | 135.5114 |
| 17400403 | Golph3l       | golgi phosphoprotein 3-like                                   | 45.49796 | 29.85209 | 35.62974 | 36.27918 | 36.84559 | 35.5407  |
| 17532246 | Gorasp1       | golgi reassembly stacking protein 1                           | 21.6027  | 28.13356 | 27.77914 | 29.59579 | 33.50234 | 22.25859 |
| 17371661 | Gorasp2       | golgi reassembly stacking protein 2                           | 138.6938 | 119.0522 | 132.672  | 119.6536 | 119.3513 | 107.6153 |
| 17266146 | Gosr1         | golgi SNAP receptor complex member 1                          | 110.4562 | 107.6691 | 93.75281 | 109.3417 | 98.67345 | 109.3849 |
| 17270567 | Gosr2         | golgi SNAP receptor complex member 2                          | 86.94252 | 77.47076 | 75.78971 | 67.19165 | 69.74414 | 68.69675 |
| 17443972 | Get4          | golgi to ER traffic protein 4 homolog (S. cerevisiae)         | 43.42217 | 33.31754 | 38.26782 | 38.26782 | 38.26782 | 35.43762 |
| 17217321 | Golt1a        | golgi transport 1 homolog A (S. cerevisiae)                   | 79.4442  | 67.94427 | 63.75692 | 67.85908 | 75.56886 | 69.31713 |
| 17464128 | Golt1b        | golgi transport 1 homolog B (S. cerevisiae)                   | 29.45111 | 19.72851 | 20.20289 | 16.74467 | 19.26566 | 15.59152 |
| 17490667 | Gfy           | golgi-associated olfactory signaling regulator                | 6.325458 | 8.172118 | 8.402508 | 7.677092 | 7.046613 | 6.236342 |
| 17229113 | Gorab         | golgin, RAB6-interacting                                      | 9.422566 | 8.51685  | 8.51685  | 8.51685  | 4.930999 | 10.47138 |
| 17359925 | Gbf1          | golgi-specific brefeldin A-resistance factor 1                | 139.3636 | 112.5288 | 106.7017 | 113.7592 | 100.7768 | 87.49326 |
| 17399194 | Gon4l         | gon-4-like (C.elegans)                                        | 34.03695 | 30.6278  | 38.76627 | 33.84709 | 21.72012 | 25.36118 |
| 17399176 | 5830417I10Rik | gon-4-like pseudogene                                         | 35.14774 | 24.83667 | 28.38919 | 38.40121 | 22.42864 | 23.79192 |
| 17301576 | Gnrh1         | gonadotropin releasing hormone 1                              | 3.733115 | 5.929991 | 5.258605 | 4.614742 | 3.879552 | 4.528427 |
| 17449213 | Gnrhr         | gonadotropin releasing hormone receptor                       | 3.224935 | 3.555593 | 3.297357 | 2.991336 | 3.42556  | 3.38792  |
| 17328823 | Gsc2          | goosecoid homeobox 2                                          | 14.38557 | 14.49959 | 14.28838 | 13.95761 | 13.19994 | 16.93634 |
| 17283685 | Gsc           | goosecoid homeobox                                            | 19.59522 | 21.83938 | 19.61996 | 28.03156 | 30.45801 | 21.83454 |
| 17308746 | Gpalpp1       | GPALPP motifs containing 1                                    | 44.2756  | 43.637   | 40.53707 | 43.77878 | 44.2756  | 50.45866 |
| 17312374 | Gpaa1         | GPI anchor attachment protein 1                               | 35.34343 | 37.33948 | 38.70613 | 34.94756 | 34.35719 | 30.64755 |
| 17312236 | Gpihbp1       | GPI-anchored HDL-binding protein 1                            | 30.56122 | 33.90415 | 36.26058 | 29.22781 | 33.90415 | 32.82789 |
| 17436151 | Gpn1          | GPN-loop GTPase 1                                             | 22.23438 | 24.15132 | 16.7492  | 22.84696 | 17.64393 | 22.34546 |
| 17419636 | Gpn2          | GPN-loop GTPase 2                                             | 22.65378 | 22.54835 | 18.49957 | 24.27854 | 23.69449 | 22.2279  |
| 17442082 | Gpn3          | GPN-loop GTPase 3                                             | 23.65675 | 20.22854 | 18.93456 | 21.55185 | 24.55866 | 19.88874 |
| 17467232 | Gprin3        | GPRIN family member 3                                         | 45.14487 | 49.04826 | 43.88968 | 48.75371 | 45.89707 | 53.06063 |
| 17541465 | Gpr119        | G-protein coupled receptor 119                                | 3.332928 | 4.064083 | 4.220781 | 3.552784 | 3.7117   | 4.191568 |
| 17455249 | Gpr12         | G-protein coupled receptor 12                                 | 5.18459  | 6.641136 | 5.687285 | 5.141681 | 7.439935 | 5.56106  |
| 17545450 | Gpr173        | G-protein coupled receptor 173                                | 4.681043 | 4.681043 | 4.543582 | 4.963267 | 5.010797 | 4.658127 |
| 17430962 | Gpr3          | G-protein coupled receptor 3                                  | 8.864259 | 7.992241 | 8.176934 | 8.176934 | 7.220907 | 8.176934 |
| 17277794 | Gpr65         | G-protein coupled receptor 65                                 | 19.64159 | 15.72567 | 16.80513 | 11.59998 | 16.13151 | 16.09633 |
| 17409663 | Gpr88         | G-protein coupled receptor 88                                 | 7.181922 | 7.698994 | 6.434643 | 8.217332 | 7.698994 | 8.524706 |
| 17368260 | Gpsm1         | G-protein signalling modulator 1 (AGS3-like, C. elegans)      | 6.315732 | 7.002305 | 6.541085 | 7.047102 | 6.691177 | 6.937376 |
| 17409386 | Gpsm2         | G-protein signalling modulator 2 (AGS3-like, C. elegans)      | 21.21569 | 20.18791 | 18.36224 | 23.75172 | 17.66277 | 20.13216 |
| 17336595 | Gpsm3         | G-protein signalling modulator 3 (AGS3-like, C. elegans)      | 10.96383 | 13.27601 | 16.38746 | 13.27601 | 12.70452 | 17.69684 |
| 17535353 | Gpr50         | G-protein-coupled receptor 50                                 | 10.32958 | 8.782003 | 8.71252  | 8.901201 | 9.560725 | 8.651378 |
| 17274513 | Grhl1         | grainyhead-like 1 (Drosophila)                                | 5.346668 | 6.224725 | 4.804246 | 5.313749 | 6.749871 | 5.614471 |
| 17311104 | Grhl2         | grainyhead-like 2 (Drosophila)                                | 8.79625  | 7.036949 | 6.992896 | 6.67663  | 7.146268 | 6.992896 |
| 17431478 | Grhl3         | grainyhead-like 3 (Drosophila)                                | 9.859674 | 8.327884 | 6.466343 | 8.553827 | 6.805211 | 7.483899 |
| 17489470 | Gramd1a       | GRAM domain containing 1A                                     | 30.29064 | 27.79956 | 24.67058 | 28.17239 | 20.13411 | 23.53474 |
| 17525803 | Gramd1b       | GRAM domain containing 1B                                     | 6.587632 | 6.575041 | 7.371662 | 5.613109 | 4.939449 | 6.869428 |
| 17330506 | Gramd1c       | GRAM domain containing 1C                                     | 43.23716 | 46.20445 | 45.02767 | 48.10117 | 50.82795 | 51.47179 |
| 17518021 | Gramd2        | GRAM domain containing 2                                      | 6.923877 | 6.171709 | 6.187643 | 7.533812 | 5.958214 | 6.171709 |
| 17350697 | Gramd3        | GRAM domain containing 3                                      | 65.91615 | 70.17183 | 76.37243 | 62.89311 | 52.47288 | 65.81388 |
| 17313926 | Gramd4        | GRAM domain containing 4                                      | 13.05934 | 10.6621  | 13.07492 | 10.49063 | 10.49063 | 7.154892 |
| 17371201 | Gca           | grancalcin                                                    | 26.33975 | 22.33044 | 20.66346 | 17.97052 | 20.82335 | 19.75875 |
| 17256959 | Gm            | granulin                                                      | 345.5115 | 483.6434 | 697.7614 | 394.4887 | 417.7946 | 333.2243 |
| 17296286 | Gzma          | granzyme A                                                    | 3.133902 | 3.318957 | 2.979851 | 2.318095 | 2.987855 | 4.2325   |
| 17307033 | Gzmb          | granzyme B                                                    | 4.139108 | 3.134641 | 3.390599 | 4.494031 | 3.230774 | 3.5534   |
| 17307025 | Gzmc          | granzyme C                                                    | 2.515613 | 2.346629 | 2.2253   | 2.668428 | 2.458673 | 2.220077 |
| 17306991 | Gzmd          | granzyme D                                                    | 2.548503 | 2.134458 | 2.243483 | 2.858087 | 3.301679 | 2.430225 |
| 17306983 | Gzme          | granzyme E                                                    | 2.492079 | 3.160932 | 3.14415  | 3.125008 | 2.738641 | 2.546296 |
| 17307017 | Gzmf          | granzyme F                                                    | 3.009972 | 2.260795 | 2.645628 | 2.779856 | 3.009972 | 4.645326 |
| 17306999 | Gzmg          | granzyme G                                                    | 2.406006 | 1.91445  | 2.257256 | 2.507466 | 2.393646 | 2.072138 |
| 17296294 | Gzmk          | granzyme K                                                    | 4.386499 | 5.631737 | 4.64362  | 5.450279 | 4.801649 | 5.096087 |
| 17234917 | Gzmm          | granzyme M (lymphocyte met-ase 1)                             | 7.963375 | 9.182646 | 11.44036 | 9.404818 | 6.845235 | 9.808891 |
| 17307007 | Gzmn          | granzyme N                                                    | 4.257274 | 3.856681 | 4.029973 | 4.802581 | 4.696773 | 6.036992 |
| 17443562 | Gigyf1        | GRB10 interacting GYF protein 1                               | 13.95984 | 10.72652 | 14.67796 | 13.96893 | 12.57555 | 15.33685 |
| 17443565 | Gigyf1        | GRB10 interacting GYF protein 1                               | 19.37884 | 29.56565 | 29.22336 | 26.61707 | 32.76764 | 30.71114 |
| 17215251 | Gigyf2        | GRB10 interacting GYF protein 2                               | 42.19149 | 39.23883 | 45.99707 | 43.5014  | 42.23479 | 36.92664 |
| 17353032 | Garem         | GRB2 associated, regulator of MAPK1                           | 86.97085 | 90.28159 | 112.2787 | 75.22759 | 83.78151 | 79.75096 |
| 17435737 | Gareml        | GRB2 associated, regulator of MAPK1-like                      | 6.397064 | 6.039001 | 6.41318  | 7.686304 | 6.177572 | 7.059764 |
| 17296128 | Gapt          | Grb2-binding adaptor, transmembrane                           | 8.346319 | 8.19742  | 6.82666  | 6.559746 | 8.022545 | 7.237242 |
| 17250615 | Grap          | GRB2-related adaptor protein                                  | 13.5976  | 11.88385 | 15.41796 | 11.50086 | 12.35189 | 14.34057 |
| 17313147 | Grap2         | GRB2-related adaptor protein 2                                | 7.374064 | 6.687931 | 5.4376   | 6.047547 | 6.266718 | 5.474776 |
| 17389467 | Grem1         | gremlin 1                                                     | 8.48862  | 8.807057 | 6.922005 | 9.703667 | 9.075141 | 7.061575 |
| 17230127 | Grem2         | gremlin 2 homolog, cysteine knot superfamily (Xenopus laevis) | 21.69725 | 29.56954 | 32.11243 | 31.40821 | 73.46983 | 41.02354 |
| 17449456 | Grsf1         | G-rich RNA sequence binding factor 1                          | 200.4446 | 181.2868 | 163.2014 | 189.0272 | 152.0793 | 189.7624 |
| 17233408 | Gcc2          | GRIP and coiled-coil domain containing 2                      | 43.90003 | 46.14364 | 50.17268 | 49.16126 | 59.64131 | 42.92095 |
| 17532973 | Gripap1       | GRIP1 associated protein 1                                    | 25.89946 | 27.48228 | 25.14204 | 31.89857 | 24.11953 | 27.02495 |
| 17449473 | Gc            | group specific component                                      | 3482.989 | 3556.371 | 3475.223 | 3288.309 | 3497.359 | 3423.675 |
| 17467316 | Gadd45a       | growth arrest and DNA-damage-inducible 45 alpha               | 28.0792  | 29.71048 | 35.98366 | 35.62776 | 34.88996 | 41.04259 |
| 17235511 | Gadd45b       | growth arrest and DNA-damage-inducible 45 beta                | 20.98185 | 37.94216 | 27.29548 | 27.52079 | 17.45695 | 21.61918 |
| 17287361 | Gadd45g       | growth arrest and DNA-damage-inducible 45 gamma               | 94.96079 | 48.08317 | 27.83233 | 34.49702 | 76.84609 | 94.30485 |

|          |            |                                                                             |          |          |          |          |          |          |
|----------|------------|-----------------------------------------------------------------------------|----------|----------|----------|----------|----------|----------|
| 17503217 | Gadd45gip1 | growth arrest and DNA-damage-inducible, gamma interacting protein 1         | 20.22489 | 16.83206 | 16.83206 | 18.49649 | 17.75631 | 15.15466 |
| 17293313 | Gas1       | growth arrest specific 1                                                    | 23.14053 | 27.42786 | 30.02787 | 27.42786 | 30.31521 | 27.42786 |
| 17478476 | Gas2       | growth arrest specific 2                                                    | 27.39746 | 28.38978 | 26.02182 | 24.45996 | 24.98655 | 28.26216 |
| 17218653 | Gas5       | growth arrest specific 5                                                    | 13.63308 | 16.55896 | 18.71729 | 17.78452 | 22.19157 | 16.2596  |
| 17507605 | Gas6       | growth arrest specific 6                                                    | 104.6146 | 116.9129 | 131.46   | 91.31817 | 135.3283 | 75.21769 |
| 17251222 | Gas7       | growth arrest specific 7                                                    | 7.988364 | 11.21284 | 8.606878 | 8.594537 | 8.866041 | 9.073128 |
| 17506680 | Gas8       | growth arrest specific 8                                                    | 19.83189 | 17.97799 | 17.14731 | 16.66489 | 15.83945 | 16.3601  |
| 17260075 | Gas2l1     | growth arrest-specific 2 like 1                                             | 30.19567 | 35.68832 | 33.57161 | 29.90697 | 25.49443 | 20.95104 |
| 17266903 | Gas2l2     | growth arrest-specific 2 like 2                                             | 11.12359 | 8.16804  | 9.583615 | 12.26819 | 6.486409 | 8.143675 |
| 17244057 | Gas2l3     | growth arrest-specific 2 like 3                                             | 9.668419 | 12.00564 | 15.37612 | 9.178001 | 12.36645 | 10.60373 |
| 17330443 | Gap43      | growth associated protein 43                                                | 2.737768 | 2.826369 | 3.236826 | 2.925595 | 2.932823 | 3.450798 |
| 17501905 | Gdf1       | growth differentiation factor 1                                             | 8.642987 | 8.790895 | 8.0349   | 10.15086 | 8.287173 | 9.5882   |
| 17298731 | Gdf10      | growth differentiation factor 10                                            | 14.75662 | 21.49039 | 33.28845 | 19.60623 | 10.24899 | 11.90116 |
| 17246352 | Gdf11      | growth differentiation factor 11                                            | 5.387366 | 5.209663 | 5.50812  | 7.119471 | 4.536281 | 6.623529 |
| 17510114 | Gdf15      | growth differentiation factor 15                                            | 15.7969  | 18.33007 | 13.17992 | 15.0383  | 11.09486 | 11.10071 |
| 17298738 | Gdf2       | growth differentiation factor 2                                             | 15.571   | 24.39105 | 22.96126 | 24.65195 | 15.42298 | 16.39859 |
| 17470592 | Gdf3       | growth differentiation factor 3                                             | 6.714221 | 6.681537 | 6.414959 | 5.785694 | 6.229688 | 6.236688 |
| 17393390 | Gdf5       | growth differentiation factor 5                                             | 5.523413 | 5.585475 | 5.987982 | 6.364071 | 6.393031 | 6.257863 |
| 17411727 | Gdf6       | growth differentiation factor 6                                             | 6.030928 | 6.030928 | 5.440201 | 4.90013  | 8.12642  | 7.135478 |
| 17279916 | Gdf7       | growth differentiation factor 7                                             | 12.95009 | 14.38616 | 12.79981 | 12.75871 | 13.11822 | 18.32206 |
| 17249515 | Gdf9       | growth differentiation factor 9                                             | 6.495632 | 7.031001 | 6.554928 | 6.105121 | 6.063917 | 5.390204 |
| 17450679 | Gfi1       | growth factor independent 1                                                 | 18.00718 | 20.13076 | 22.1148  | 19.7778  | 14.62779 | 18.56045 |
| 17383413 | Gfi1b      | growth factor independent 1B                                                | 10.72124 | 10.65863 | 9.180101 | 9.022517 | 10.72124 | 13.97368 |
| 17260668 | Grb10      | growth factor receptor bound protein 10                                     | 15.69203 | 15.35323 | 22.60155 | 16.78185 | 15.50434 | 12.25433 |
| 17385853 | Grb14      | growth factor receptor bound protein 14                                     | 39.40509 | 32.55055 | 34.01337 | 41.32005 | 42.16167 | 44.8694  |
| 17272004 | Grb2       | growth factor receptor bound protein 2                                      | 67.40436 | 63.8082  | 65.69219 | 72.53071 | 69.86897 | 72.55635 |
| 17510823 | Gab1       | growth factor receptor bound protein 2-associated protein 1                 | 35.00235 | 38.25642 | 47.02806 | 40.87424 | 33.86281 | 38.44063 |
| 17480312 | Gab2       | growth factor receptor bound protein 2-associated protein 2                 | 8.401984 | 14.25316 | 15.81115 | 13.37799 | 8.567237 | 14.37121 |
| 17542732 | Gab3       | growth factor receptor bound protein 2-associated protein 3                 | 3.002179 | 4.186661 | 3.568926 | 3.643715 | 3.643715 | 3.295666 |
| 17256033 | Grb7       | growth factor receptor bound protein 7                                      | 99.91158 | 108.2212 | 126.0253 | 121.0828 | 118.9359 | 118.5433 |
| 17341987 | Gfer       | growth factor, erv1 (S. cerevisiae)-like (augmenter of liver regeneration)  | 47.89456 | 41.90005 | 37.65553 | 41.61783 | 39.84316 | 44.85789 |
| 17270829 | Gh         | growth hormone                                                              | 4.644972 | 5.711778 | 6.95331  | 6.82666  | 6.418339 | 7.833082 |
| 17305167 | Ghitm      | growth hormone inducible transmembrane protein                              | 371.7425 | 375.8231 | 373.178  | 342.1014 | 269.6829 | 302.1037 |
| 17315635 | Ghr        | growth hormone receptor                                                     | 123.585  | 104.3871 | 88.46715 | 112.1806 | 117.3342 | 130.1887 |
| 17393743 | Ghrh       | growth hormone releasing hormone                                            | 5.38942  | 5.578665 | 5.209374 | 5.19315  | 5.573679 | 6.221489 |
| 17548820 | Ghrhr      | growth hormone releasing hormone receptor                                   | 6.002735 | 6.226537 | 7.625701 | 5.46223  | 6.458683 | 6.226537 |
| 17396395 | Ghsr       | growth hormone secretagogue receptor                                        | 11.77839 | 11.26691 | 10.08249 | 12.12825 | 11.15872 | 9.360334 |
| 17348320 | Greb1l     | growth regulation by estrogen in breast cancer-like                         | 3.392033 | 6.910595 | 5.134593 | 4.833506 | 3.983482 | 5.172565 |
| 17315167 | Grasp      | GRP1 (general receptor for phosphoinositides 1)-associated scaffold protein | 25.90359 | 32.74448 | 29.95407 | 25.62162 | 25.07121 | 29.47664 |
| 17436931 | Grpel1     | GrpE-like 1, mitochondrial                                                  | 115.8232 | 114.1874 | 143.3959 | 114.6188 | 131.1796 | 138.192  |
| 17354804 | Grpel2     | GrpE-like 2, mitochondrial                                                  | 46.58327 | 64.4389  | 75.17286 | 59.52649 | 56.49182 | 64.9303  |
| 17444836 | Gsx1       | GS homeobox 1                                                               | 5.764039 | 5.433644 | 5.298081 | 5.55871  | 5.433644 | 5.006457 |
| 17438233 | Gsx2       | GS homeobox 2                                                               | 6.714128 | 6.992896 | 9.787565 | 6.816306 | 6.728104 | 8.215566 |
| 17496102 | Gsg1l      | GSG1-like                                                                   | 14.0397  | 19.94285 | 14.82305 | 18.65564 | 14.85998 | 15.90535 |
| 17251257 | Gsg1l2     | GSG1-like 2                                                                 | 5.338965 | 5.009338 | 5.203708 | 3.949254 | 4.779137 | 5.18459  |
| 17278410 | Gskip      | GSK3B interacting protein                                                   | 23.49611 | 35.3324  | 31.03986 | 34.35885 | 35.91937 | 35.12923 |
| 17443083 | Gtf2ird2   | GTF2I repeat domain containing 2                                            | 19.76451 | 20.80892 | 17.94811 | 18.51214 | 19.54503 | 18.49085 |
| 17411840 | Gem        | GTP binding protein (gene overexpressed in skeletal muscle)                 | 10.1025  | 10.41377 | 9.087289 | 10.1025  | 6.581608 | 10.1025  |
| 17313023 | Gtpbp1     | GTP binding protein 1                                                       | 54.14927 | 47.83882 | 55.78673 | 53.38306 | 44.17475 | 53.09301 |
| 17337984 | Gtpbp2     | GTP binding protein 2                                                       | 22.4291  | 27.64506 | 31.9847  | 30.8325  | 29.91236 | 27.65024 |
| 17502206 | Gtpbp3     | GTP binding protein 3                                                       | 18.08047 | 17.22927 | 17.25294 | 20.13816 | 16.29401 | 13.8812  |
| 17290398 | Gtpbp4     | GTP binding protein 4                                                       | 77.78122 | 70.25992 | 61.0877  | 73.45353 | 71.50687 | 71.05085 |
| 17450952 | Gtpbp6     | GTP binding protein 6 (putative)                                            | 22.17927 | 20.12714 | 18.29934 | 26.81819 | 18.12413 | 19.76533 |
| 17305748 | Gch1       | GTP cyclohydrolase 1                                                        | 203.3808 | 207.4716 | 200.278  | 261.4552 | 228.0443 | 221.6946 |
| 17374738 | Gchfr      | GTP cyclohydrolase I feedback regulator                                     | 71.89203 | 72.28929 | 76.17312 | 78.05505 | 89.30815 | 102.7511 |
| 17249833 | G3bp1      | GTPase activating protein (SH3 domain) binding protein 1                    | 66.36129 | 59.08541 | 60.56112 | 59.0723  | 79.46678 | 50.41007 |
| 17449627 | G3bp2      | GTPase activating protein (SH3 domain) binding protein 2                    | 96.18033 | 94.47954 | 110.7429 | 122.6234 | 96.87416 | 112.4734 |
| 17384252 | Gapvd1     | GTPase activating protein and VPS9 domains 1                                | 67.19957 | 65.9061  | 64.61289 | 66.57137 | 68.19528 | 69.79008 |
| 17384100 | Garnl3     | GTPase activating RANGAP domain-like 3                                      | 6.925412 | 6.54299  | 5.120306 | 5.967638 | 6.826377 | 6.54299  |
| 17458379 | Gimap1     | GTPase, IMAP family member 1                                                | 9.143459 | 6.706035 | 8.423151 | 8.51502  | 5.997495 | 6.885875 |
| 17466615 | Gimap1os   | GTPase, IMAP family member 1, opposite strand                               | 6.860007 | 6.355431 | 6.503111 | 5.937312 | 7.500413 | 4.747178 |
| 17466618 | Gimap3     | GTPase, IMAP family member 3                                                | 8.717352 | 8.286024 | 12.25272 | 8.300855 | 7.891229 | 8.139838 |
| 17458362 | Gimap4     | GTPase, IMAP family member 4                                                | 27.29245 | 26.09045 | 28.01563 | 24.99885 | 21.74015 | 23.18179 |
| 17458385 | Gimap5     | GTPase, IMAP family member 5                                                | 6.066061 | 6.150655 | 6.337571 | 8.230614 | 5.120306 | 7.304421 |
| 17466606 | Gimap6     | GTPase, IMAP family member 6                                                | 9.488237 | 8.832427 | 11.25473 | 8.827531 | 9.488237 | 8.689481 |
| 17458372 | Gimap7     | GTPase, IMAP family member 7                                                | 3.488943 | 4.319218 | 2.948355 | 4.246252 | 2.848752 | 2.99881  |
| 17458345 | Gimap8     | GTPase, IMAP family member 8                                                | 7.539192 | 10.19903 | 11.31685 | 9.825018 | 11.90231 | 12.27848 |
| 17458355 | Gimap9     | GTPase, IMAP family member 9                                                | 7.743737 | 7.434522 | 7.299815 | 7.698994 | 10.51415 | 8.029944 |
| 17494656 | Gvin1      | GTPase, very large interferon inducible 1                                   | 78.59415 | 57.43467 | 66.9383  | 71.45931 | 83.64225 | 40.33275 |
| 17494649 | Gm17757    | GTPase, very large interferon inducible 1 pseudogene                        | 56.91709 | 46.05609 | 56.52824 | 51.9575  | 49.89212 | 36.60858 |
| 17494662 | Gm18853    | GTPase, very large interferon inducible 1 pseudogene                        | 64.94786 | 53.56096 | 64.47241 | 53.35198 | 55.53441 | 40.29475 |
| 17494668 | Gm4759     | GTPase, very large interferon inducible 1 pseudogene                        | 4.413307 | 2.301014 | 3.009972 | 2.619806 | 3.009972 | 3.729055 |
| 17445381 | Gtpbp10    | GTP-binding protein 10 (putative)                                           | 30.73009 | 34.24164 | 27.26201 | 35.39417 | 34.61031 | 35.09394 |
| 17330602 | Gtpbp8     | GTP-binding protein 8 (putative)                                            | 36.37108 | 33.49445 | 28.27314 | 35.19601 | 25.94474 | 35.83283 |
| 17242842 | Gamt       | guanidinoacetate methyltransferase                                          | 156.2238 | 141.6081 | 161.5694 | 156.4502 | 220.9613 | 172.2954 |
| 17363470 | Gda        | guanine deaminase                                                           | 48.35422 | 45.11953 | 49.03024 | 37.99374 | 37.80434 | 37.34569 |
| 17398020 | Gmps       | guanine monophosphate synthetase                                            | 10.28108 | 8.367925 | 8.974739 | 7.297033 | 6.923013 | 6.983741 |
| 17398023 | Gmps       | guanine monophosphate synthetase                                            | 126.6576 | 85.64814 | 84.34672 | 96.07439 | 96.12168 | 89.70273 |
| 17445735 | Gnai1      | guanine nucleotide binding protein (G protein), alpha inhibiting 1          | 18.62954 | 14.46345 | 19.14665 | 12.96814 | 17.7844  | 15.89135 |
| 17530955 | Gnai2      | guanine nucleotide binding protein (G protein), alpha inhibiting 2          | 154.1755 | 144.9378 | 142.0987 | 144.3963 | 117.0515 | 128.0284 |
| 17409217 | Gnai3      | guanine nucleotide binding protein (G protein), alpha inhibiting 3          | 190.8718 | 159.8384 | 155.7491 | 153.4825 | 140.7138 | 161.2997 |
| 17422573 | Gnb1       | guanine nucleotide binding protein (G protein), beta 1                      | 229.839  | 261.017  | 297.2247 | 202.287  | 230.3877 | 198.6039 |
| 17454049 | Gnb2       | guanine nucleotide binding protein (G protein), beta 2                      | 56.86583 | 52.88769 | 55.88736 | 53.21681 | 52.10464 | 52.59195 |
| 17470917 | Gnb3       | guanine nucleotide binding protein (G protein), beta 3                      | 6.964791 | 7.513734 | 7.831562 | 6.943004 | 5.590472 | 7.795275 |

|          |         |                                                                                  |          |          |          |          |          |          |
|----------|---------|----------------------------------------------------------------------------------|----------|----------|----------|----------|----------|----------|
| 17404601 | Gnb4    | guanine nucleotide binding protein (G protein), beta 4                           | 17.55804 | 16.33472 | 13.84295 | 14.31296 | 9.151575 | 16.34333 |
| 17519481 | Gnb5    | guanine nucleotide binding protein (G protein), beta 5                           | 3.394808 | 3.243025 | 3.740082 | 4.461813 | 4.045001 | 3.729055 |
| 17323736 | Gnb1l   | guanine nucleotide binding protein (G protein), beta polypeptide 1-like          | 6.216748 | 8.310124 | 6.398262 | 7.251352 | 6.845519 | 9.445715 |
| 17248873 | Gnb2l1  | guanine nucleotide binding protein (G protein), beta polypeptide 2 like 1        | 37.42784 | 37.42784 | 39.95405 | 32.21007 | 37.42784 | 36.51988 |
| 17248890 | Gnb2l1  | guanine nucleotide binding protein (G protein), beta polypeptide 2 like 1        | 22.80487 | 26.79868 | 27.21764 | 37.11061 | 39.80092 | 29.85892 |
| 17414428 | Gng10   | guanine nucleotide binding protein (G protein), gamma 10                         | 30.00643 | 27.93845 | 35.09005 | 27.93845 | 26.074   | 24.33009 |
| 17455793 | Gng11   | guanine nucleotide binding protein (G protein), gamma 11                         | 22.62789 | 20.30397 | 16.26941 | 26.36112 | 12.96922 | 26.65307 |
| 17459250 | Gng12   | guanine nucleotide binding protein (G protein), gamma 12                         | 91.20494 | 98.0367  | 90.08531 | 85.43113 | 87.72098 | 78.83258 |
| 17334716 | Gng13   | guanine nucleotide binding protein (G protein), gamma 13                         | 7.129891 | 8.150621 | 5.88805  | 7.412345 | 7.452425 | 7.949643 |
| 17303706 | Gng2    | guanine nucleotide binding protein (G protein), gamma 2                          | 10.71983 | 15.21508 | 16.43694 | 15.26388 | 15.46881 | 17.91592 |
| 17362511 | Gng3    | guanine nucleotide binding protein (G protein), gamma 3                          | 3.279759 | 3.253494 | 5.301902 | 3.357622 | 3.939684 | 4.119702 |
| 17285322 | Gng4    | guanine nucleotide binding protein (G protein), gamma 4                          | 14.57749 | 16.57492 | 15.40108 | 12.44807 | 13.30927 | 15.20738 |
| 17403543 | Gng5    | guanine nucleotide binding protein (G protein), gamma 5                          | 12.64198 | 10.48228 | 12.26325 | 9.488237 | 9.500807 | 12.16226 |
| 17243147 | Gng7    | guanine nucleotide binding protein (G protein), gamma 7                          | 17.96989 | 16.92038 | 21.23335 | 18.91095 | 15.29269 | 15.93338 |
| 17474211 | Gng8    | guanine nucleotide binding protein (G protein), gamma 8                          | 3.763226 | 6.106814 | 4.83431  | 4.48569  | 3.953965 | 5.181644 |
| 17455787 | Gngt1   | guanine nucleotide binding protein (G protein), gamma transducing activity polyp | 4.315268 | 3.753353 | 3.673792 | 4.053646 | 3.753353 | 4.041862 |
| 17255466 | Gngt2   | guanine nucleotide binding protein (G protein), gamma transducing activity polyp | 11.93197 | 19.41689 | 19.18478 | 21.56605 | 16.45336 | 16.45336 |
| 17243392 | Gna11   | guanine nucleotide binding protein, alpha 11                                     | 137.2945 | 130.084  | 132.3129 | 109.3167 | 135.3143 | 115.9517 |
| 17544617 | Gna12   | guanine nucleotide binding protein, alpha 12                                     | 221.8945 | 221.0456 | 200.2488 | 201.2103 | 194.5409 | 181.4112 |
| 17257822 | Gna13   | guanine nucleotide binding protein, alpha 13                                     | 46.08611 | 59.71163 | 47.85839 | 44.67048 | 48.99661 | 41.58957 |
| 17357971 | Gna14   | guanine nucleotide binding protein, alpha 14                                     | 14.31296 | 15.60017 | 13.39423 | 11.96294 | 9.545495 | 14.78795 |
| 17243382 | Gna15   | guanine nucleotide binding protein, alpha 15                                     | 10.28707 | 11.04552 | 7.007549 | 7.698994 | 6.789804 | 8.979219 |
| 17503884 | Gnao1   | guanine nucleotide binding protein, alpha O                                      | 5.942541 | 6.127633 | 6.859198 | 6.171709 | 4.996161 | 6.341702 |
| 17357959 | Gnaq    | guanine nucleotide binding protein, alpha q polypeptide                          | 52.0065  | 55.72257 | 54.13051 | 50.92104 | 66.69007 | 60.99588 |
| 17351426 | Gnal    | guanine nucleotide binding protein, alpha stimulating, olfactory type            | 4.420655 | 4.886969 | 4.558534 | 4.680199 | 5.39757  | 4.886969 |
| 17530990 | Gnat1   | guanine nucleotide binding protein, alpha transducing 1                          | 11.23478 | 17.8968  | 21.96189 | 20.08769 | 25.78839 | 18.87415 |
| 17401629 | Gnat2   | guanine nucleotide binding protein, alpha transducing 2                          | 4.65219  | 3.320637 | 3.8336   | 5.19722  | 3.843871 | 3.596242 |
| 17434995 | Gnat3   | guanine nucleotide binding protein, alpha transducing 3                          | 3.150673 | 3.263862 | 3.430122 | 2.469519 | 3.198998 | 2.71782  |
| 17234264 | Gnaz    | guanine nucleotide binding protein, alpha z subunit                              | 4.01461  | 3.191025 | 3.667889 | 4.801649 | 3.278896 | 3.544003 |
| 17337349 | Gnl1    | guanine nucleotide binding protein-like 1                                        | 19.6788  | 17.33649 | 25.33588 | 27.62189 | 24.55185 | 24.56326 |
| 17418413 | Gnl2    | guanine nucleotide binding protein-like 2 (nucleolar)                            | 68.55167 | 59.87575 | 63.10533 | 49.07989 | 71.19924 | 54.94286 |
| 17304493 | Gnl3    | guanine nucleotide binding protein-like 3 (nucleolar)                            | 70.66383 | 59.79571 | 55.69786 | 53.75921 | 62.76116 | 48.86501 |
| 17545381 | Gnl3l   | guanine nucleotide binding protein-like 3 (nucleolar)-like                       | 38.55911 | 32.8748  | 29.23148 | 27.94252 | 30.6278  | 30.6278  |
| 17535808 | Gdi1    | guanosine diphosphate (GDP) dissociation inhibitor 1                             | 107.7751 | 129.3548 | 115.8384 | 101.8266 | 109.888  | 112.436  |
| 17284880 | Gdi2    | guanosine diphosphate (GDP) dissociation inhibitor 2                             | 375.5237 | 352.8986 | 330.3153 | 332.3225 | 319.9893 | 345.0424 |
| 17286973 | Gmpr    | guanosine monophosphate reductase                                                | 12.46698 | 12.60295 | 12.60295 | 13.21404 | 12.56353 | 13.21404 |
| 17300638 | Gmpr2   | guanosine monophosphate reductase 2                                              | 40.18318 | 41.22764 | 36.95557 | 41.81417 | 35.31894 | 43.41104 |
| 17450515 | Gbp11   | guanylate binding protein 11                                                     | 31.29912 | 30.06389 | 36.31239 | 37.7164  | 25.66126 | 19.46243 |
| 17403268 | Gbp2    | guanylate binding protein 2                                                      | 17.48469 | 12.24474 | 16.76941 | 12.31248 | 15.80107 | 17.07555 |
| 17403255 | Gbp2b   | guanylate binding protein 2b                                                     | 20.36373 | 19.76738 | 21.00732 | 13.23081 | 11.81485 | 19.76738 |
| 17403237 | Gbp3    | guanylate binding protein 3                                                      | 10.80068 | 10.12289 | 19.30349 | 16.71162 | 16.41451 | 23.80743 |
| 17450461 | Gbp4    | guanylate binding protein 4                                                      | 3.828422 | 4.262678 | 7.787445 | 5.214685 | 4.377448 | 5.809927 |
| 17403205 | Gbp5    | guanylate binding protein 5                                                      | 6.335726 | 6.935885 | 6.164312 | 5.322891 | 5.882176 | 5.909188 |
| 17450477 | Gbp6    | guanylate binding protein 6                                                      | 2.714563 | 2.524697 | 2.435807 | 2.718536 | 2.491319 | 3.289641 |
| 17403224 | Gbp7    | guanylate binding protein 7                                                      | 57.09055 | 36.6797  | 62.19299 | 55.44018 | 65.32349 | 42.72889 |
| 17514399 | Gucy1a2 | guanylate cyclase 1, soluble, alpha 2                                            | 11.5078  | 12.33298 | 10.98604 | 11.16654 | 11.79816 | 12.27516 |
| 17406221 | Gucy1a3 | guanylate cyclase 1, soluble, alpha 3                                            | 20.55133 | 20.16428 | 21.1615  | 22.29456 | 19.75273 | 17.81586 |
| 17307526 | Gucy1b2 | guanylate cyclase 1, soluble, beta 2                                             | 3.68024  | 3.457382 | 3.096868 | 3.688643 | 4.232823 | 3.381258 |
| 17406205 | Gucy1b3 | guanylate cyclase 1, soluble, beta 3                                             | 11.63194 | 24.14261 | 21.43312 | 14.98337 | 14.7604  | 19.20886 |
| 17472129 | Gucy2c  | guanylate cyclase 2c                                                             | 11.28231 | 10.48198 | 13.1064  | 9.099706 | 9.25928  | 11.26238 |
| 17480466 | Gucy2d  | guanylate cyclase 2d                                                             | 5.385462 | 5.780603 | 5.385462 | 4.974736 | 4.688739 | 6.635016 |
| 17264538 | Gucy2e  | guanylate cyclase 2e                                                             | 5.087405 | 5.338965 | 5.338965 | 5.338965 | 5.55609  | 5.397458 |
| 17545023 | Gucy2f  | guanylate cyclase 2f                                                             | 5.921612 | 5.604905 | 5.48933  | 6.341614 | 6.234181 | 5.48933  |
| 17365755 | Gucy2g  | guanylate cyclase 2g                                                             | 3.729055 | 4.792705 | 3.729055 | 3.729055 | 4.536187 | 3.82137  |
| 17345670 | Guca1a  | guanylate cyclase activator 1a (retina)                                          | 4.316733 | 6.722277 | 7.241055 | 6.818432 | 5.56283  | 5.082295 |
| 17338245 | Guca1b  | guanylate cyclase activator 1B                                                   | 8.536591 | 7.890901 | 7.313743 | 9.737895 | 9.005023 | 8.49745  |
| 17417946 | Guca2a  | guanylate cyclase activator 2a (guanylin)                                        | 5.772875 | 8.638495 | 5.525596 | 6.0951   | 4.501107 | 3.951855 |
| 17429441 | Guca2b  | guanylate cyclase activator 2b (retina)                                          | 7.381735 | 8.661459 | 7.843676 | 8.51685  | 6.326818 | 7.680605 |
| 17263362 | Guk1    | guanylate kinase 1                                                               | 55.14201 | 48.86501 | 49.39421 | 56.8473  | 54.49606 | 57.43746 |
| 17450501 | Gbp10   | guanylate-binding protein 10                                                     | 224.4266 | 138.2753 | 182.6857 | 236.4072 | 134.1674 | 222.9166 |
| 17450434 | Gbp8    | guanylate-binding protein 8                                                      | 29.36061 | 26.04672 | 39.89677 | 20.95075 | 48.4989  | 28.3208  |
| 17450448 | Gbp9    | guanylate-binding protein 9                                                      | 51.43149 | 43.09444 | 46.46717 | 54.41038 | 36.27943 | 47.83518 |
| 17241822 | Gucd1   | guanylyl cyclase domain containing 1                                             | 32.8338  | 25.70594 | 27.99156 | 26.66934 | 29.06941 | 27.80515 |
| 17437998 | Guf1    | GUF1 GTPase homolog (S. cerevisiae)                                              | 23.00667 | 22.62789 | 24.05392 | 25.83061 | 25.01324 | 28.14545 |
| 17307801 | Gulo    | gulonolactone (L-) oxidase                                                       | 656.1128 | 516.3552 | 578.2903 | 616.2278 | 867.464  | 698.555  |
| 17212442 | Gulp1   | GULP, engulfment adaptor PTB domain containing 1                                 | 4.180861 | 3.920832 | 3.824842 | 4.196132 | 3.691891 | 5.082576 |
| 17216201 | Gin1    | gypsy retrotransposon integrase 1                                                | 14.33878 | 17.36608 | 12.57381 | 12.98397 | 19.20141 | 14.07107 |
| 17312882 | H1f0    | H1 histone family, member 0                                                      | 122.6574 | 113.4592 | 135.4992 | 145.1831 | 152.5481 | 155.1683 |
| 17321199 | H1fnt   | H1 histone family, member N, testis-specific                                     | 4.318948 | 4.997962 | 4.637284 | 4.997962 | 5.120306 | 5.718077 |
| 17462044 | H1foo   | H1 histone family, member O, oocyte-specific                                     | 4.681043 | 4.231825 | 5.303299 | 4.801649 | 6.405051 | 5.262141 |
| 17468702 | H1fx    | H1 histone family, member X                                                      | 9.501729 | 10.93226 | 10.77361 | 11.22567 | 9.08414  | 12.49518 |
| 17230715 | Hlx     | H2.0-like homeobox                                                               | 16.69993 | 20.19141 | 18.85859 | 20.28175 | 17.70568 | 20.02319 |
| 17381988 | H2afb1  | H2A histone family, member B1                                                    | 12.20508 | 8.726783 | 10.03466 | 14.24585 | 6.678481 | 10.29855 |
| 17548827 | H2afb2  | H2A histone family, member B2                                                    | 11.64969 | 11.72146 | 11.79832 | 11.56513 | 11.64969 | 17.85678 |
| 17548877 | H2afb3  | H2A histone family, member B3                                                    | 3.600557 | 3.864415 | 4.037046 | 3.870661 | 3.862273 | 3.451157 |
| 17463833 | H2afj   | H2A histone family, member J                                                     | 10.79424 | 11.49457 | 8.196341 | 10.41665 | 10.77533 | 9.102545 |
| 17260357 | H2afv   | H2A histone family, member V                                                     | 56.73275 | 52.36569 | 56.24138 | 46.74143 | 68.23405 | 61.49682 |
| 17516558 | H2afx   | H2A histone family, member X                                                     | 65.22757 | 42.84129 | 50.89422 | 41.64467 | 58.69436 | 37.78548 |
| 17292974 | H2afy   | H2A histone family, member Y                                                     | 71.81981 | 59.68804 | 65.28637 | 55.59757 | 73.29435 | 62.21541 |
| 17241240 | H2afy2  | H2A histone family, member Y2                                                    | 3.445014 | 3.451013 | 5.383185 | 4.295154 | 4.325689 | 2.882219 |
| 17317415 | H2afy3  | H2A histone family, member Y3                                                    | 17.7823  | 15.99579 | 27.89085 | 17.39475 | 18.48035 | 20.58726 |
| 17403004 | H2afz   | H2A histone family, member Z                                                     | 23.12273 | 25.74713 | 22.16129 | 23.36893 | 17.33901 | 24.40441 |
| 17537978 | H2bfm   | H2B histone family, member M                                                     | 3.532109 | 3.547321 | 3.661082 | 3.983012 | 4.035479 | 4.337188 |
| 17343735 | H2-Ke6  | H2-K region expressed gene 6                                                     | 99.09566 | 91.56726 | 92.53582 | 98.06524 | 85.73724 | 95.71347 |

|          |          |                                                                      |          |          |          |          |          |          |
|----------|----------|----------------------------------------------------------------------|----------|----------|----------|----------|----------|----------|
| 17230469 | H3f3a    | H3 histone, family 3A                                                | 10.80083 | 10.92938 | 10.1025  | 10.33467 | 8.415739 | 9.920137 |
| 17272095 | H3f3b    | H3 histone, family 3B                                                | 8.370188 | 10.42894 | 11.24366 | 12.82592 | 12.67426 | 13.53488 |
| 17436832 | Hmx1     | H6 homeobox 1                                                        | 7.01095  | 6.884252 | 6.824957 | 5.295732 | 7.935109 | 6.588865 |
| 17484035 | Hmx2     | H6 homeobox 2                                                        | 17.05934 | 14.95027 | 11.31465 | 13.53225 | 15.65205 | 14.59558 |
| 17484030 | Hmx3     | H6 homeobox 3                                                        | 12.60295 | 13.34308 | 15.23196 | 13.23045 | 12.60295 | 13.12722 |
| 17301768 | Hr       | hairless                                                             | 8.715842 | 7.466955 | 8.363808 | 7.287076 | 9.716589 | 7.730705 |
| 17324623 | Hes1     | hairy and enhancer of split 1 (Drosophila)                           | 12.32837 | 13.45266 | 19.24471 | 25.10112 | 16.46317 | 20.24818 |
| 17422109 | Hes2     | hairy and enhancer of split 2 (Drosophila)                           | 13.65739 | 10.94652 | 12.83695 | 14.33152 | 11.06108 | 11.36322 |
| 17433461 | Hes3     | hairy and enhancer of split 3 (Drosophila)                           | 5.425214 | 5.730893 | 5.532264 | 5.36523  | 5.848311 | 5.819479 |
| 17422443 | Hes5     | hairy and enhancer of split 5 (Drosophila)                           | 3.531375 | 4.663328 | 4.342151 | 4.853347 | 3.872298 | 4.534866 |
| 17225499 | Hes6     | hairy and enhancer of split 6                                        | 22.41014 | 20.25828 | 18.80742 | 19.86215 | 21.12047 | 27.05437 |
| 17251557 | Hes7     | hairy and enhancer of split 7 (Drosophila)                           | 26.04113 | 27.58745 | 26.2079  | 30.60764 | 28.44947 | 27.53758 |
| 17404011 | Hey1     | hairy/enhancer-of-split related with YRPW motif 1                    | 10.00452 | 15.067   | 20.28906 | 17.9271  | 14.25524 | 18.0831  |
| 17240077 | Hey2     | hairy/enhancer-of-split related with YRPW motif 2                    | 7.341679 | 6.992896 | 5.456629 | 6.561884 | 5.407418 | 7.005655 |
| 17418177 | Heyl     | hairy/enhancer-of-split related with YRPW motif-like                 | 9.240686 | 12.64127 | 10.68237 | 10.36034 | 9.734454 | 10.03376 |
| 17354356 | Hdhd1a   | haloacid dehalogenase-like hydrolase domain containing 1A            | 2.647095 | 2.469331 | 2.500281 | 2.64297  | 3.414821 | 2.194573 |
| 17351919 | Hdhd2    | haloacid dehalogenase-like hydrolase domain containing 2             | 45.28433 | 45.11202 | 51.40939 | 43.44445 | 45.51342 | 42.61059 |
| 17426198 | Hdhd3    | haloacid dehalogenase-like hydrolase domain containing 3             | 10.71099 | 9.848404 | 6.33498  | 9.639177 | 8.810171 | 7.581956 |
| 17512809 | Hp       | haptoglobin                                                          | 2386.631 | 2572.419 | 2743.268 | 2045.333 | 2996.536 | 2200.202 |
| 17441524 | Hrk      | harakiri, BCL2 interacting protein (contains only BH3 domain)        | 3.071514 | 3.776186 | 4.648258 | 3.703322 | 4.123102 | 3.729055 |
| 17373406 | Harbi1   | harbinger transposase derived 1                                      | 19.67293 | 12.63287 | 16.59745 | 16.56045 | 18.65293 | 18.521   |
| 17477670 | Rras     | Harvey rat sarcoma oncogene, subgroup R                              | 37.25701 | 61.4687  | 75.95853 | 53.99036 | 37.72084 | 42.35499 |
| 17497785 | Hras     | Harvey rat sarcoma virus oncogene                                    | 33.79154 | 32.2447  | 30.44092 | 32.93752 | 35.8455  | 28.25198 |
| 17355538 | Haus1    | HAUS augmin-like complex, subunit 1                                  | 15.60396 | 16.51414 | 15.19853 | 19.51998 | 11.89176 | 18.17823 |
| 17375100 | Haus2    | HAUS augmin-like complex, subunit 2                                  | 30.5119  | 27.96422 | 24.99643 | 29.13558 | 29.26248 | 31.02243 |
| 17306384 | Haus4    | HAUS augmin-like complex, subunit 4                                  | 25.25417 | 22.62789 | 17.58252 | 23.34805 | 24.88165 | 24.31913 |
| 17489251 | Haus5    | HAUS augmin-like complex, subunit 5                                  | 14.20936 | 13.48562 | 13.1551  | 13.39423 | 9.538153 | 12.72638 |
| 17426956 | Haus6    | HAUS augmin-like complex, subunit 6                                  | 11.79661 | 10.74944 | 9.84274  | 10.62308 | 10.47806 | 10.08158 |
| 17542349 | Haus7    | HAUS augmin-like complex, subunit 7                                  | 9.003338 | 8.624077 | 8.467112 | 7.130632 | 10.50752 | 8.211695 |
| 17232003 | Hbs1     | Hbs1-like (S. cerevisiae)                                            | 136.5826 | 120.6932 | 105.7065 | 115.0965 | 115.6002 | 113.8452 |
| 17407190 | Hax1     | HCLS1 associated X-1                                                 | 123.2651 | 113.8713 | 106.211  | 111.777  | 128.1189 | 107.7721 |
| 17273910 | Hs1bp3   | HCLS1 binding protein 3                                              | 22.22575 | 31.20034 | 25.37578 | 23.70714 | 26.50954 | 26.16343 |
| 17232444 | Hddc2    | HD domain containing 2                                               | 4.433082 | 5.300432 | 5.22659  | 6.260162 | 7.89473  | 6.196012 |
| 17479596 | Hddc3    | HD domain containing 3                                               | 11.99657 | 16.61322 | 15.73102 | 19.04922 | 11.40536 | 15.95437 |
| 17239493 | Heca     | headcase homolog (Drosophila)                                        | 57.20225 | 55.88309 | 50.04972 | 53.44007 | 58.73628 | 59.72073 |
| 17263063 | Hand1    | heart and neural crest derivatives expressed transcript 1            | 8.858669 | 10.10544 | 8.863644 | 9.533064 | 11.77969 | 15.72099 |
| 17501272 | Hand2    | heart and neural crest derivatives expressed transcript 2            | 23.21765 | 24.88009 | 23.4896  | 22.08676 | 26.9085  | 29.33152 |
| 17285157 | Heatr1   | HEAT repeat containing 1                                             | 46.2894  | 31.54261 | 28.19153 | 31.04825 | 27.69435 | 26.51745 |
| 17503572 | Heatr3   | HEAT repeat containing 3                                             | 44.99741 | 36.2744  | 30.02204 | 36.09007 | 41.64583 | 34.36124 |
| 17282450 | Heatr4   | HEAT repeat containing 4                                             | 7.45289  | 4.707333 | 4.350587 | 5.265243 | 4.982742 | 5.956934 |
| 17281025 | Heatr5a  | HEAT repeat containing 5A                                            | 33.73303 | 29.24423 | 28.35478 | 27.14811 | 27.57349 | 24.5085  |
| 17347307 | Heatr5b  | HEAT repeat containing 5B                                            | 4.748428 | 3.204413 | 3.567838 | 3.135227 | 3.413094 | 3.4027   |
| 17347311 | Heatr5b  | HEAT repeat containing 5B                                            | 36.91205 | 30.18647 | 35.53872 | 30.87998 | 29.47827 | 33.02782 |
| 17254305 | Heatr6   | HEAT repeat containing 6                                             | 36.5604  | 34.42894 | 36.17046 | 39.09765 | 36.00861 | 33.77866 |
| 17266928 | Heatr9   | HEAT repeat containing 9                                             | 3.276215 | 4.082209 | 4.183731 | 5.283595 | 3.806909 | 4.183731 |
| 17455507 | Hsph1    | heat shock 105kDa/110kDa protein 1                                   | 179.5411 | 97.92735 | 101.8202 | 113.9336 | 72.20816 | 71.78597 |
| 17312485 | Hsf1     | heat shock factor 1                                                  | 32.3912  | 33.1788  | 42.0257  | 32.20762 | 28.08679 | 30.77549 |
| 17233357 | Hsf2     | heat shock factor 2                                                  | 58.5631  | 61.10083 | 62.3259  | 57.37936 | 56.248   | 63.75869 |
| 17506067 | Hsbp1    | heat shock factor binding protein 1                                  | 147.5735 | 224.1095 | 250.9333 | 190.9141 | 188.8281 | 190.5968 |
| 17355634 | Hsbp1l1  | heat shock factor binding protein 1-like 1                           | 4.358676 | 3.923442 | 4.536658 | 4.184079 | 4.20927  | 4.111315 |
| 17443342 | Hsbp1    | heat shock protein 1                                                 | 31.31062 | 31.98758 | 39.8357  | 31.55792 | 22.58589 | 20.59397 |
| 17212882 | Hspe1    | heat shock protein 1 (chaperonin 10)                                 | 87.6839  | 116.7056 | 91.2492  | 120.6764 | 108.0706 | 120.0399 |
| 17223228 | Hspd1    | heat shock protein 1 (chaperonin)                                    | 452.5646 | 514.7542 | 484.751  | 544.9047 | 469.9326 | 514.9469 |
| 17365992 | Hspa12a  | heat shock protein 12A                                               | 5.367015 | 5.328797 | 4.917926 | 5.528967 | 5.328797 | 5.211288 |
| 17366008 | Hspa12a  | heat shock protein 12A                                               | 4.572046 | 4.228307 | 4.664524 | 4.093316 | 4.085209 | 4.67242  |
| 17376423 | Hspa12b  | heat shock protein 12B                                               | 9.438123 | 12.26028 | 10.39285 | 12.17627 | 13.11576 | 10.74132 |
| 17381235 | Hspa14   | heat shock protein 14                                                | 14.86523 | 13.94601 | 14.96468 | 15.46034 | 12.1107  | 15.46034 |
| 17344132 | Hspa1a   | heat shock protein 1A                                                | 28.90426 | 10.21183 | 8.467112 | 4.256389 | 4.809977 | 4.681043 |
| 17344126 | Hspa1b   | heat shock protein 1B                                                | 271.5982 | 125.7679 | 69.86558 | 35.39221 | 27.8924  | 18.10542 |
| 17336824 | Hspa1l   | heat shock protein 1-like                                            | 4.240634 | 4.647678 | 4.978151 | 4.774898 | 4.857689 | 3.891186 |
| 17276565 | Hspa2    | heat shock protein 2                                                 | 13.06658 | 10.83442 | 16.72367 | 11.07358 | 14.87874 | 14.37958 |
| 17526923 | Hspb2    | heat shock protein 2                                                 | 9.995647 | 12.58209 | 11.36401 | 9.76033  | 10.48228 | 10.48228 |
| 17296317 | Hspb3    | heat shock protein 3                                                 | 8.115219 | 6.877384 | 6.992896 | 6.992896 | 6.992896 | 8.100495 |
| 17262621 | Hspa4    | heat shock protein 4                                                 | 226.6371 | 199.2727 | 187.242  | 218.7744 | 188.9538 | 199.2727 |
| 17397240 | Hspa4l   | heat shock protein 4 like                                            | 66.7155  | 51.13609 | 45.10483 | 42.61236 | 30.56122 | 37.83265 |
| 17370103 | Hspa5    | heat shock protein 5                                                 | 364.8855 | 153.867  | 149.3538 | 167.4423 | 181.7964 | 120.1165 |
| 17331533 | Hspa13   | heat shock protein 70 family, member 13                              | 77.72032 | 38.77756 | 33.83255 | 33.93119 | 43.1315  | 35.73783 |
| 17516365 | Hspa8    | heat shock protein 8                                                 | 1606.906 | 1391.138 | 1528.224 | 1264.744 | 1151.198 | 1176.063 |
| 17451816 | Hspb8    | heat shock protein 8                                                 | 137.9757 | 164.5988 | 154.8395 | 150.5637 | 134.6509 | 150.075  |
| 17353554 | Hspa9    | heat shock protein 9                                                 | 1179.075 | 1207.46  | 1197.06  | 1142.185 | 1164.093 | 1219.201 |
| 17345186 | Hsp90ab1 | heat shock protein 90 alpha (cytosolic), class B member 1            | 298.24   | 293.7551 | 285.0517 | 268.318  | 206.9746 | 274.0395 |
| 17370727 | Gm13498  | heat shock protein 90 alpha (cytosolic), class B member 1 pseudogene | 3.177716 | 2.701742 | 2.410463 | 2.42627  | 2.913837 | 2.630451 |
| 17284002 | Hsp90aa1 | heat shock protein 90, alpha (cytosolic), class A member 1           | 116.0297 | 94.96079 | 90.75153 | 82.98278 | 53.97689 | 61.29553 |
| 17243738 | Hsp90b1  | heat shock protein 90, beta (Grp94), member 1                        | 1729.441 | 1085.828 | 1046.931 | 1147.581 | 1225.02  | 1110.89  |
| 17416448 | Hspb11   | heat shock protein family B (small), member 11                       | 16.18348 | 14.61239 | 17.54721 | 11.96667 | 19.77191 | 13.15838 |
| 17421074 | Hspb7    | heat shock protein family, member 7 (cardiovascular)                 | 7.291876 | 10.63369 | 10.66876 | 13.43682 | 10.66876 | 11.13307 |
| 17476456 | Hspb6    | heat shock protein, alpha-crystallin-related, B6                     | 51.27878 | 73.54982 | 77.87401 | 59.98584 | 42.0598  | 43.73056 |
| 17256436 | Hspb9    | heat shock protein, alpha-crystallin-related, B9                     | 9.731553 | 9.438974 | 8.916454 | 9.3628   | 10.64482 | 11.75164 |
| 17343278 | Hsf2bp   | heat shock transcription factor 2 binding protein                    | 4.008076 | 4.566187 | 4.382184 | 3.611004 | 4.480748 | 3.800476 |
| 17543376 | Hsf3     | heat shock transcription factor 3                                    | 2.406006 | 2.406006 | 2.372306 | 2.458111 | 2.458673 | 2.210542 |
| 17504688 | Hsf4     | heat shock transcription factor 4                                    | 18.16312 | 18.78748 | 19.79782 | 15.68822 | 18.53795 | 18.3396  |
| 17254801 | Hsf5     | heat shock transcription factor family member 5                      | 5.477585 | 5.032342 | 5.371444 | 5.097783 | 7.279503 | 5.893072 |
| 17223279 | Hsfy2    | heat shock transcription factor, Y-linked 2                          | 2.328224 | 2.242596 | 2.255238 | 2.255238 | 1.875844 | 2.216019 |
| 17316392 | Hrsp12   | heat-responsive protein 12                                           | 1472.376 | 1422.487 | 1414.082 | 1317.63  | 1200.658 | 1345.96  |

|          |               |                                                                              |          |          |          |          |          |          |
|----------|---------------|------------------------------------------------------------------------------|----------|----------|----------|----------|----------|----------|
| 17518694 | Herc1         | hect (homologous to the E6-AP (UBE3A) carboxyl terminus) domain and RCC1 (Cf | 59.18091 | 61.77024 | 65.27235 | 58.20858 | 57.04743 | 52.61054 |
| 17478601 | Herc2         | hect (homologous to the E6-AP (UBE3A) carboxyl terminus) domain and RCC1 (Cf | 41.59793 | 38.64956 | 39.1937  | 41.55759 | 40.56237 | 41.59793 |
| 17233113 | Hace1         | HECT domain and ankyrin repeat containing, E3 ubiquitin protein ligase 1     | 5.925143 | 6.649427 | 5.343741 | 7.698994 | 4.611736 | 8.153672 |
| 17459038 | Herc3         | hect domain and RLD 3                                                        | 12.73697 | 15.10694 | 12.90171 | 13.90171 | 16.16633 | 15.10694 |
| 17233888 | Herc4         | hect domain and RLD 4                                                        | 108.6527 | 112.3184 | 99.57281 | 114.8542 | 104.8774 | 106.8283 |
| 17458962 | Herc6         | hect domain and RLD 6                                                        | 65.28049 | 48.0745  | 68.76202 | 78.06587 | 79.98403 | 75.82754 |
| 17280980 | Hectd1        | HECT domain containing 1                                                     | 341.114  | 290.0122 | 241.0385 | 288.5285 | 272.1032 | 277.9112 |
| 17358905 | Hectd2        | HECT domain containing 2                                                     | 6.992896 | 5.919847 | 4.984504 | 6.530122 | 6.145371 | 7.02126  |
| 17417573 | Hectd3        | HECT domain containing 3                                                     | 42.59316 | 45.02299 | 45.93621 | 44.66863 | 49.79331 | 49.11494 |
| 17290738 | Hecw1         | HECT, C2 and WW domain containing E3 ubiquitin protein ligase 1              | 4.801649 | 4.801649 | 4.583279 | 4.801649 | 4.445606 | 4.801649 |
| 17223080 | Hecw2         | HECT, C2 and WW domain containing E3 ubiquitin protein ligase 2              | 10.1427  | 12.09719 | 14.88255 | 14.36643 | 11.68763 | 11.78386 |
| 17538744 | Huwe1         | HECT, UBA and WWE domain containing 1                                        | 162.0865 | 183.8608 | 182.6313 | 170.7474 | 175.1758 | 164.5931 |
| 17231135 | Hhat          | hedgehog acyltransferase                                                     | 5.295585 | 6.992896 | 7.521029 | 7.812856 | 7.347024 | 6.216058 |
| 17532367 | Hhatl         | hedgehog acyltransferase-like                                                | 7.160697 | 6.71022  | 5.863329 | 6.115583 | 7.190639 | 6.111261 |
| 17278529 | Hhipl1        | hedgehog interacting protein-like 1                                          | 12.09711 | 10.62411 | 11.51394 | 11.13315 | 11.40765 | 11.46465 |
| 17220464 | Hhipl2        | hedgehog interacting protein-like 2                                          | 3.403337 | 4.20927  | 4.20927  | 3.909272 | 4.515013 | 4.20927  |
| 17510772 | Hhip          | Hedgehog-interacting protein                                                 | 9.939202 | 7.70161  | 7.169189 | 7.803871 | 6.177144 | 7.169189 |
| 17325069 | Heg1          | HEG homolog 1 (zebrafish)                                                    | 52.2772  | 52.36896 | 69.4908  | 52.48743 | 49.21479 | 36.20633 |
| 17245383 | Helb          | helicase (DNA) B                                                             | 23.85252 | 25.40059 | 23.2006  | 27.83446 | 24.27451 | 21.23865 |
| 17395801 | Helz2         | helicase with zinc finger 2, transcriptional coactivator                     | 70.13827 | 74.70071 | 72.63686 | 88.0945  | 74.19705 | 64.12211 |
| 17257683 | Helz          | helicase with zinc finger domain                                             | 37.69366 | 38.98399 | 39.48684 | 38.98399 | 39.87742 | 36.01535 |
| 17359212 | Hells         | helicase, lymphoid specific                                                  | 4.966295 | 4.259193 | 5.120341 | 6.274324 | 4.912032 | 6.444373 |
| 17450157 | Helq          | helicase, POIQ-like                                                          | 16.17989 | 15.82386 | 14.77504 | 17.62706 | 16.23595 | 16.23595 |
| 17396287 | Hltf          | helicase-like transcription factor                                           | 36.51077 | 36.72753 | 35.39712 | 33.6119  | 35.01813 | 34.22195 |
| 17509182 | Helt          | helt bHLH transcription factor                                               | 4.017617 | 3.371732 | 3.306099 | 3.894559 | 3.41861  | 3.41861  |
| 17342101 | Hn1l          | hematological and neurological expressed 1-like                              | 66.50358 | 68.53742 | 58.71349 | 64.22798 | 81.03482 | 62.95242 |
| 17241799 | 1700049L16Rik | hematological and neurological expressed 1-like pseudogene                   | 5.16386  | 7.520507 | 4.762701 | 4.67404  | 3.984172 | 7.462867 |
| 17271920 | Hn1           | hematological and neurological expressed sequence 1                          | 20.12114 | 21.05061 | 27.65235 | 20.78744 | 19.74328 | 21.42911 |
| 17489046 | Hcst          | hematopoietic cell signal transducer                                         | 9.46131  | 8.967961 | 11.18025 | 10.10425 | 10.41167 | 7.472184 |
| 17325438 | Hcls1         | hematopoietic cell specific Lyn substrate 1                                  | 20.9615  | 23.45527 | 22.9285  | 20.29525 | 28.32728 | 21.96143 |
| 17467269 | Hpgds         | hematopoietic prostaglandin D synthase                                       | 5.48933  | 5.48933  | 5.916279 | 5.48933  | 6.450943 | 5.48933  |
| 17502406 | Hsh2d         | hematopoietic SH2 domain containing                                          | 4.844138 | 4.42464  | 4.844138 | 6.969668 | 4.401392 | 4.502793 |
| 17359045 | Hhex          | hematopoietically expressed homeobox                                         | 68.77251 | 58.35765 | 39.06244 | 50.10352 | 48.56348 | 44.4928  |
| 17472063 | Hebp1         | heme binding protein 1                                                       | 169.0622 | 176.3637 | 171.4257 | 187.1356 | 191.9212 | 196.6982 |
| 17239539 | Hebp2         | heme binding protein 2                                                       | 5.421304 | 5.820528 | 5.635095 | 5.800712 | 5.935872 | 5.702522 |
| 17502573 | Hmox1         | heme oxygenase 1                                                             | 32.83289 | 75.00111 | 69.35558 | 36.19529 | 36.84406 | 24.31526 |
| 17322559 | Hmox2         | heme oxygenase 2                                                             | 59.23878 | 60.63337 | 59.79902 | 63.44216 | 61.82335 | 61.30658 |
| 17227910 | Hmcn1         | hemicentin 1                                                                 | 5.042293 | 5.515073 | 5.159782 | 5.463366 | 4.63738  | 5.042293 |
| 17369379 | Hmcn2         | hemicentin 2                                                                 | 7.662951 | 7.698994 | 7.663322 | 8.49533  | 8.170985 | 7.663322 |
| 17530884 | Hemk1         | HemK methyltransferase family member 1                                       | 11.19009 | 12.58715 | 12.2841  | 18.11835 | 14.37709 | 15.66171 |
| 17291211 | Hfe           | hemochromatosis                                                              | 60.56112 | 60.56112 | 59.69094 | 65.29452 | 59.47906 | 64.88261 |
| 17400592 | Hfe2          | hemochromatosis type 2 (juvenile) (human homolog)                            | 146.9692 | 144.2153 | 182.0057 | 197.7961 | 155.3814 | 162.2877 |
| 17425028 | Hemgn         | hemogen                                                                      | 4.487805 | 3.984255 | 4.365812 | 4.814213 | 6.5129   | 5.792716 |
| 17248263 | Hba-a1        | hemoglobin alpha, adult chain 1                                              | 29.29454 | 49.21513 | 49.00986 | 41.93259 | 29.34433 | 19.66666 |
| 17248276 | Hba-a2        | hemoglobin alpha, adult chain 2                                              | 753.1482 | 1217.183 | 1798.315 | 980.6062 | 375.6434 | 87.20023 |
| 17494236 | Hbb-bh2       | hemoglobin beta, bh2                                                         | 3.344638 | 3.362024 | 3.481165 | 4.110005 | 4.488054 | 3.38018  |
| 17248255 | Hba-x         | hemoglobin X, alpha-like embryonic chain in Hba complex                      | 3.032211 | 3.006698 | 3.279123 | 3.263839 | 2.721402 | 2.795216 |
| 17494246 | Hbb-y         | hemoglobin Y, beta-like embryonic chain                                      | 3.29754  | 3.533162 | 2.67402  | 3.471767 | 3.209703 | 3.85206  |
| 17494240 | Hbb-bh1       | hemoglobin Z, beta-like embryonic chain                                      | 2.884517 | 4.263801 | 4.604996 | 4.508164 | 5.33508  | 5.492527 |
| 17494228 | Hbb-bs        | hemoglobin, beta adult s chain                                               | 3.315117 | 2.887738 | 3.615838 | 3.199885 | 2.703035 | 2.357291 |
| 17494221 | Hbb-bt        | hemoglobin, beta adult t chain                                               | 21.49352 | 31.5798  | 37.36304 | 20.79565 | 8.320556 | 2.736345 |
| 17248282 | Hbq1a         | hemoglobin, theta 1A                                                         | 3.50601  | 5.248445 | 5.389121 | 4.129651 | 4.770069 | 5.011213 |
| 17248270 | Hbq1b         | hemoglobin, theta 1B                                                         | 10.28272 | 13.02201 | 11.25949 | 7.764968 | 10.66876 | 10.98125 |
| 17384374 | Hc            | hemolytic complement                                                         | 1493.229 | 1435.393 | 1336.533 | 1260.456 | 1461.607 | 1096.72  |
| 17494528 | Hpx           | hemopexin                                                                    | 3561.502 | 4074.056 | 4417.242 | 3212.053 | 4293.891 | 3345.184 |
| 17377870 | Hck           | hemopoietic cell kinase                                                      | 33.99098 | 22.14824 | 27.89162 | 31.04459 | 22.03049 | 24.65964 |
| 17401805 | Henmt1        | HEN1 methyltransferase homolog 1 (Arabidopsis)                               | 4.118332 | 4.080427 | 4.969153 | 4.046852 | 3.958682 | 4.078165 |
| 17464539 | Hepacam2      | HEPACAM family member 2                                                      | 4.186603 | 3.450822 | 3.494752 | 3.559291 | 3.726471 | 3.531179 |
| 17447726 | Hs3st1        | heparan sulfate (glucosamine) 3-O-sulfotransferase 1                         | 4.496897 | 3.655959 | 4.184514 | 3.787485 | 3.460739 | 4.20927  |
| 17482669 | Hs3st2        | heparan sulfate (glucosamine) 3-O-sulfotransferase 2                         | 3.803137 | 4.532792 | 4.224879 | 5.071034 | 4.128907 | 5.362962 |
| 17250871 | Hs3st3a1      | heparan sulfate (glucosamine) 3-O-sulfotransferase 3A1                       | 12.356   | 11.88187 | 11.15153 | 11.93867 | 7.870417 | 11.82723 |
| 17264102 | Hs3st3b1      | heparan sulfate (glucosamine) 3-O-sulfotransferase 3B1                       | 100.7621 | 86.69218 | 101.7729 | 88.38012 | 117.7244 | 97.7368  |
| 17482907 | Hs3st4        | heparan sulfate (glucosamine) 3-O-sulfotransferase 4                         | 16.55747 | 18.76757 | 16.72959 | 15.16633 | 16.91241 | 17.72803 |
| 17232549 | Hs3st5        | heparan sulfate (glucosamine) 3-O-sulfotransferase 5                         | 2.781359 | 3.54506  | 3.302732 | 4.32494  | 3.263862 | 3.407444 |
| 17334427 | Hs3st6        | heparan sulfate (glucosamine) 3-O-sulfotransferase 6                         | 19.01268 | 22.89324 | 18.79269 | 18.76536 | 16.28453 | 14.85905 |
| 17410818 | Hs2st1        | heparan sulfate 2-O-sulfotransferase 1                                       | 26.63497 | 23.22087 | 24.05442 | 23.69893 | 25.75124 | 20.78297 |
| 17211790 | Hs6st1        | heparan sulfate 6-O-sulfotransferase 1                                       | 136.6262 | 110.2787 | 128.7225 | 114.9849 | 148.3612 | 114.8375 |
| 17541636 | Hs6st2        | heparan sulfate 6-O-sulfotransferase 2                                       | 4.559893 | 3.883318 | 4.119102 | 3.89907  | 5.321268 | 3.610078 |
| 17302747 | Hs6st3        | heparan sulfate 6-O-sulfotransferase 3                                       | 7.316634 | 5.29687  | 6.139921 | 5.57681  | 4.974115 | 6.151635 |
| 17508445 | Hgsnat        | heparan-alpha-glucosaminide N-acetyltransferase                              | 79.66477 | 78.07561 | 77.88157 | 68.95389 | 80.14219 | 80.09832 |
| 17450142 | Hpse          | heparanase                                                                   | 32.70796 | 34.30365 | 32.70796 | 33.6394  | 32.28137 | 21.34816 |
| 17364917 | Hpse2         | heparanase 2                                                                 | 6.78557  | 7.738532 | 6.78557  | 8.932971 | 7.546407 | 8.119101 |
| 17353699 | Hbegf         | heparin-binding EGF-like growth factor                                       | 13.45742 | 12.31803 | 14.46165 | 14.18988 | 14.31296 | 14.18988 |
| 17267702 | Hlf           | hepatic leukemia factor                                                      | 45.09107 | 44.74951 | 56.24839 | 51.74796 | 52.63316 | 49.38531 |
| 17394041 | Hnf4aos       | hepatic nuclear factor 4 alpha, opposite strand                              | 15.61521 | 21.09487 | 22.18481 | 22.61926 | 15.79231 | 13.74762 |
| 17379268 | Hnf4a         | hepatic nuclear factor 4, alpha                                              | 492.8552 | 535.5621 | 533.4429 | 517.2543 | 517.2543 | 476.2978 |
| 17248847 | Havcr1        | hepatitis A virus cellular receptor 1                                        | 3.460763 | 3.516256 | 4.337038 | 4.332651 | 4.420716 | 4.21926  |
| 17248809 | Havcr2        | hepatitis A virus cellular receptor 2                                        | 5.338965 | 4.022326 | 4.892019 | 4.330519 | 5.229888 | 4.606401 |
| 17516036 | Hepacam       | hepatocyte cell adhesion molecule                                            | 4.507133 | 4.860787 | 4.647678 | 4.647678 | 4.334694 | 5.737133 |
| 17434933 | Hgf           | hepatocyte growth factor                                                     | 63.83121 | 64.24312 | 56.35571 | 50.10039 | 29.89599 | 35.21236 |
| 17436793 | Hgfac         | hepatocyte growth factor activator                                           | 142.1539 | 124.9477 | 124.3463 | 121.1609 | 167.5084 | 136.9903 |
| 17395955 | Hnf4g         | hepatocyte nuclear factor 4, gamma                                           | 3.211016 | 2.953407 | 3.009972 | 3.041768 | 3.533579 | 3.842779 |
| 17291408 | Hdgfl1        | hepatoma derived growth factor-like 1                                        | 7.206007 | 6.349443 | 6.552475 | 7.669593 | 6.043691 | 4.948221 |
| 17398863 | Hdgf          | hepatoma-derived growth factor                                               | 190.4238 | 157.593  | 168.7952 | 156.5631 | 145.2053 | 148.8123 |

|          |               |                                                                            |          |          |          |          |          |          |
|----------|---------------|----------------------------------------------------------------------------|----------|----------|----------|----------|----------|----------|
| 17338715 | Hdgfrp2       | hepatoma-derived growth factor, related protein 2                          | 48.19161 | 46.18972 | 46.20381 | 52.99153 | 50.30465 | 51.43826 |
| 17492861 | Hdgfrp3       | hepatoma-derived growth factor, related protein 3                          | 5.901779 | 7.007889 | 6.07435  | 6.758251 | 5.772595 | 6.281852 |
| 17489363 | Hamp          | hepcidin antimicrobial peptide                                             | 422.7614 | 305.4368 | 106.3525 | 1263.246 | 1095.414 | 3871.186 |
| 17489357 | Hamp2         | hepcidin antimicrobial peptide 2                                           | 6.305409 | 6.075824 | 6.555019 | 16.37236 | 9.658104 | 134.2641 |
| 17536390 | Heph          | hephaestin                                                                 | 7.684226 | 6.288823 | 6.287864 | 6.287864 | 5.65756  | 8.420524 |
| 17524117 | Heph1l        | hephaestin-like 1                                                          | 4.222069 | 4.486032 | 3.808492 | 4.162066 | 3.451898 | 3.874661 |
| 17489441 | Hpn           | hepsin                                                                     | 148.1906 | 176.3295 | 183.9245 | 190.2417 | 188.8164 | 173.3195 |
| 17364890 | Hps1          | Hermansky-Pudlak syndrome 1 homolog (human)                                | 10.0091  | 9.210886 | 9.043116 | 11.29021 | 9.711472 | 10.35101 |
| 17404300 | Hps3          | Hermansky-Pudlak syndrome 3 homolog (human)                                | 16.7822  | 19.07274 | 20.47157 | 18.57834 | 15.41411 | 17.26131 |
| 17440692 | Hps4          | Hermansky-Pudlak syndrome 4 homolog (human)                                | 15.93061 | 21.83227 | 23.10879 | 24.57518 | 16.89307 | 36.62863 |
| 17491211 | Hps5          | Hermansky-Pudlak syndrome 5 homolog (human)                                | 19.72318 | 25.11975 | 18.1372  | 18.17622 | 16.65115 | 15.61986 |
| 17359874 | Hps6          | Hermansky-Pudlak syndrome 6                                                | 9.596112 | 9.650877 | 7.708392 | 11.44638 | 12.44505 | 11.82657 |
| 17525075 | Herpud2       | HERPUD family member 2                                                     | 123.2078 | 109.3508 | 118.9103 | 112.5787 | 112.2911 | 114.4941 |
| 17317574 | Hhla1         | HERV-H LTR-associating 1                                                   | 3.789139 | 3.981881 | 3.613758 | 4.060423 | 3.922518 | 3.752313 |
| 17420425 | Hp1bp3        | heterochromatin protein 1, binding protein 3                               | 53.77971 | 57.30345 | 64.31128 | 61.361   | 61.361   | 67.20935 |
| 17262478 | Hnmpab        | heterogeneous nuclear ribonucleoprotein A/B                                | 377.9836 | 345.5427 | 311.6213 | 325.5962 | 312.4085 | 327.0778 |
| 17293085 | Hnmpa0        | heterogeneous nuclear ribonucleoprotein A0                                 | 65.16927 | 66.32358 | 58.46657 | 54.22777 | 73.69118 | 68.2279  |
| 17315546 | Hnmpa1        | heterogeneous nuclear ribonucleoprotein A1                                 | 108.6798 | 141.8734 | 159.6258 | 140.9686 | 143.7392 | 143.9456 |
| 17532524 | Gm10052       | heterogeneous nuclear ribonucleoprotein A1 pseudogene                      | 134.8994 | 183.6863 | 216.4095 | 182.3833 | 228.4952 | 188.8949 |
| 17538295 | Gm5643        | heterogeneous nuclear ribonucleoprotein A1 pseudogene                      | 2.051743 | 2.371632 | 2.125791 | 2.337733 | 2.765039 | 2.255629 |
| 17466768 | Hnmpa2b1      | heterogeneous nuclear ribonucleoprotein A2/B1                              | 256.5436 | 302.0325 | 275.5729 | 249.9681 | 251.6893 | 291.0231 |
| 17372140 | Hnmpa3        | heterogeneous nuclear ribonucleoprotein A3                                 | 57.98147 | 70.22535 | 63.14996 | 60.15614 | 78.68791 | 62.77508 |
| 17513228 | Gm6793        | heterogeneous nuclear ribonucleoprotein A3 pseudogene                      | 3.435047 | 4.031481 | 5.063026 | 8.209191 | 7.627869 | 5.26725  |
| 17382354 | LOC102638359  | heterogeneous nuclear ribonucleoprotein A3 pseudogene                      | 3.463883 | 4.889951 | 6.18537  | 5.415933 | 4.787094 | 7.977242 |
| 17306189 | Hnmpc         | heterogeneous nuclear ribonucleoprotein C                                  | 163.0364 | 148.317  | 149.9877 | 175.1989 | 176.244  | 166.7127 |
| 17450022 | Hnmpd         | heterogeneous nuclear ribonucleoprotein D                                  | 81.26431 | 84.62957 | 78.56746 | 82.95862 | 77.67293 | 80.87545 |
| 17450034 | Hnmpdl        | heterogeneous nuclear ribonucleoprotein D-like                             | 57.16103 | 69.00744 | 81.1253  | 74.26703 | 74.15849 | 70.02994 |
| 17462191 | Hnmpf         | heterogeneous nuclear ribonucleoprotein F                                  | 107.4923 | 96.68901 | 102.5952 | 91.92084 | 99.45762 | 104.2165 |
| 17548525 | Hnmpf         | heterogeneous nuclear ribonucleoprotein F                                  | 49.65063 | 50.03341 | 49.58837 | 46.21727 | 61.22971 | 49.61725 |
| 17249176 | HnmpH1        | heterogeneous nuclear ribonucleoprotein H1                                 | 61.65517 | 73.60439 | 64.9303  | 59.64751 | 50.50555 | 69.07492 |
| 17537722 | HnmpH2        | heterogeneous nuclear ribonucleoprotein H2                                 | 62.06896 | 57.60412 | 63.5064  | 62.06896 | 56.25736 | 63.9295  |
| 17241534 | HnmpH3        | heterogeneous nuclear ribonucleoprotein H3                                 | 51.35348 | 79.14959 | 74.71417 | 81.84997 | 68.05787 | 91.57678 |
| 17293142 | Hnmpk         | heterogeneous nuclear ribonucleoprotein K                                  | 58.15656 | 68.42777 | 75.08225 | 68.97301 | 72.00823 | 57.64845 |
| 17475956 | HnmpL         | heterogeneous nuclear ribonucleoprotein L                                  | 111.5696 | 140.95   | 132.4928 | 132.8947 | 141.8734 | 138.9691 |
| 17347475 | HnmpLl        | heterogeneous nuclear ribonucleoprotein L-like                             | 44.90923 | 44.90923 | 37.66911 | 39.93883 | 51.40262 | 49.3812  |
| 17343580 | Hnmpm         | heterogeneous nuclear ribonucleoprotein M                                  | 113.9494 | 122.535  | 126.5514 | 122.637  | 128.0586 | 142.874  |
| 17420091 | HnmpR         | heterogeneous nuclear ribonucleoprotein R                                  | 37.25985 | 41.2225  | 40.74073 | 37.94558 | 43.35571 | 43.37795 |
| 17420106 | HnmpR         | heterogeneous nuclear ribonucleoprotein R                                  | 5.113    | 6.992896 | 5.937353 | 5.362218 | 8.580966 | 8.420524 |
| 17420108 | HnmpR         | heterogeneous nuclear ribonucleoprotein R                                  | 4.378024 | 4.883448 | 5.020914 | 4.80951  | 6.898296 | 5.063939 |
| 17230279 | Hnmpu         | heterogeneous nuclear ribonucleoprotein U                                  | 35.47892 | 70.37202 | 57.66044 | 76.80509 | 59.63387 | 91.63393 |
| 17230282 | Hnmpu         | heterogeneous nuclear ribonucleoprotein U                                  | 350.8839 | 404.0976 | 344.8583 | 388.489  | 382.5965 | 410.2473 |
| 17488013 | Hnmpul1       | heterogeneous nuclear ribonucleoprotein U-like 1                           | 137.5126 | 141.781  | 143.6775 | 128.4168 | 130.5465 | 140.3767 |
| 17357219 | Hnmpul2       | heterogeneous nuclear ribonucleoprotein U-like 2                           | 92.73423 | 110.7045 | 107.5989 | 108.8132 | 114.5989 | 125.2928 |
| 17257085 | Hexim1        | hexamethylene bis-acetamide inducible 1                                    | 70.39153 | 88.22894 | 71.79592 | 75.19371 | 75.49452 | 66.38107 |
| 17257089 | Hexim2        | hexamethylene bis-acetamide inducible 2                                    | 7.814535 | 7.667679 | 7.747495 | 7.311006 | 7.19767  | 10.58163 |
| 17241318 | Hk1           | hexokinase 1                                                               | 7.003179 | 8.410899 | 10.84968 | 10.46217 | 7.228468 | 7.541963 |
| 17233783 | Hk1os         | hexokinase 1, opposite strand                                              | 9.731553 | 9.40384  | 10.12858 | 10.16043 | 10.44065 | 10.19952 |
| 17468018 | Hk2           | hexokinase 2                                                               | 11.42704 | 11.62622 | 13.86245 | 12.23244 | 10.3961  | 13.92697 |
| 17292775 | Hk3           | hexokinase 3                                                               | 11.7908  | 14.18073 | 12.43918 | 12.10927 | 9.889379 | 13.70025 |
| 17241355 | Hkdc1         | hexokinase domain containing 1                                             | 10.12725 | 11.02449 | 10.58713 | 8.857319 | 8.815852 | 8.787178 |
| 17259563 | Hexdc         | hexosaminidase (glycosyl hydrolase family 20, catalytic domain) containing | 12.99883 | 16.87412 | 16.93117 | 16.2011  | 16.2011  | 14.7859  |
| 17517947 | Hexa          | hexosaminidase A                                                           | 150.7851 | 179.4191 | 196.7541 | 163.1539 | 167.685  | 139.9085 |
| 17295278 | Hexb          | hexosaminidase B                                                           | 34.82834 | 46.4131  | 54.72811 | 48.01423 | 53.08381 | 51.88588 |
| 17433251 | H6pd          | hexose-6-phosphate dehydrogenase (glucose 1-dehydrogenase)                 | 280.0246 | 263.6737 | 237.753  | 253.7739 | 241.815  | 200.5808 |
| 17450572 | Hfm1          | HFM1, ATP-dependent DNA helicase homolog (S. cerevisiae)                   | 2.508491 | 2.66139  | 2.255364 | 3.176416 | 2.713171 | 2.679883 |
| 17259344 | Hgs           | HGF-regulated tyrosine kinase substrate                                    | 77.44284 | 69.43976 | 73.51313 | 66.28773 | 72.79664 | 60.23583 |
| 17312418 | Hgh1          | HGH1 homolog                                                               | 16.39064 | 16.09377 | 18.80338 | 16.90608 | 16.59205 | 14.17641 |
| 17271861 | Hid1          | HID1 domain containing                                                     | 9.729462 | 10.01916 | 9.735331 | 7.688222 | 6.680981 | 8.05799  |
| 17532403 | Higd1a        | HIG1 domain family, member 1A                                              | 26.83548 | 24.99227 | 24.32504 | 32.52597 | 25.0436  | 26.51065 |
| 17257026 | Higd1b        | HIG1 domain family, member 1B                                              | 6.413092 | 6.008563 | 6.7635   | 6.7635   | 6.992896 | 7.630248 |
| 17315012 | Higd1c        | HIG1 domain family, member 1C                                              | 4.718146 | 4.412848 | 5.076274 | 4.20927  | 4.113852 | 3.89437  |
| 17287466 | Higd2a        | HIG1 domain family, member 2A                                              | 166.2799 | 208.7135 | 222.0914 | 203.4513 | 188.2949 | 200.8424 |
| 17225728 | Hdlbp         | high density lipoprotein (HDL) binding protein                             | 892.6619 | 749.456  | 725.5946 | 683.7571 | 686.031  | 649.7946 |
| 17537527 | 4921511C20Rik | high density lipoprotein (HDL) binding protein pseudogene                  | 3.531106 | 2.860882 | 2.360676 | 2.5951   | 3.131578 | 2.547196 |
| 17517576 | Hmg20a        | high mobility group 20A                                                    | 20.26783 | 21.62368 | 27.42405 | 21.71349 | 17.67098 | 18.29212 |
| 17243286 | Hmg20b        | high mobility group 20B                                                    | 31.55638 | 37.37107 | 36.37991 | 36.87957 | 41.47212 | 34.03908 |
| 17335129 | Hmga1         | high mobility group AT-hook 1                                              | 27.99466 | 28.56111 | 27.29264 | 32.29435 | 34.49439 | 27.07989 |
| 17245422 | Hmga2         | high mobility group AT-hook 2                                              | 9.772245 | 12.34136 | 8.945673 | 11.11434 | 11.49648 | 10.97524 |
| 17230225 | Hmga2-ps1     | high mobility group AT-hook 2, pseudogene 1                                | 4.348567 | 5.101353 | 4.681043 | 4.801649 | 4.681043 | 4.612152 |
| 17259507 | Hmga1-rs1     | high mobility group AT-hook 1, related sequence 1                          | 55.68358 | 61.68766 | 58.55376 | 68.16267 | 51.53033 | 42.2064  |
| 17455476 | Hmgb1         | high mobility group box 1                                                  | 55.29434 | 51.68737 | 51.5557  | 53.31095 | 60.61614 | 60.82785 |
| 17547917 | Hmgb1         | high mobility group box 1                                                  | 506.0935 | 618.5644 | 624.1894 | 539.2797 | 784.5546 | 725.0014 |
| 17548488 | Hmgb1         | high mobility group box 1                                                  | 592.0807 | 744.5784 | 740.9128 | 710.3174 | 944.7115 | 861.2331 |
| 17547787 | Hmgb1-ps9     | high mobility group box 1, pseudogene 9 [Source:MGI Symbol;Acc:MGI:96115]  | 349.1613 | 426.665  | 440.0397 | 389.8107 | 483.238  | 475.3512 |
| 17500451 | Hmgb1-rs17    | high mobility group box 1, related sequence 17                             | 2.764349 | 2.538507 | 2.318401 | 2.249057 | 2.339289 | 2.393646 |
| 17501292 | Hmgb2         | high mobility group box 2                                                  | 11.53999 | 11.63049 | 13.58855 | 9.474107 | 15.6829  | 13.44334 |
| 17237275 | Gm5176        | high mobility group box 2 pseudogene                                       | 4.626432 | 5.213275 | 4.586743 | 5.22938  | 5.908779 | 3.531938 |
| 17535344 | Hmgb3         | high mobility group box 3                                                  | 10.10159 | 14.23075 | 12.94246 | 10.58405 | 16.33416 | 7.995731 |
| 17280577 | Hbp1          | high mobility group box transcription factor 1                             | 147.364  | 135.4804 | 128.294  | 132.547  | 135.6128 | 126.9283 |
| 17332447 | Hmgn1         | high mobility group nucleosomal binding domain 1                           | 63.49055 | 71.98777 | 67.86802 | 63.39073 | 95.2185  | 69.46238 |
| 17431136 | Hmgn2         | high mobility group nucleosomal binding domain 2                           | 3.462322 | 3.480513 | 3.91703  | 4.801316 | 3.937364 | 5.005173 |
| 17510494 | Hmgn2         | high mobility group nucleosomal binding domain 2                           | 4.278722 | 5.396709 | 4.531504 | 3.161107 | 4.720599 | 6.797951 |
| 17529276 | Hmgn3         | high mobility group nucleosomal binding domain 3                           | 7.70177  | 7.356094 | 6.265632 | 8.626946 | 8.591023 | 10.19458 |
| 17544196 | Hdx           | highly divergent homeobox                                                  | 3.197224 | 2.900577 | 2.734638 | 3.160494 | 3.892346 | 3.358577 |

|          |           |                                                                   |          |          |          |          |          |          |
|----------|-----------|-------------------------------------------------------------------|----------|----------|----------|----------|----------|----------|
| 17430253 | Hmgb4     | high-mobility group box 4                                         | 6.175261 | 5.831593 | 6.140048 | 5.347298 | 6.494147 | 6.157608 |
| 17418850 | Hmgb4os   | high-mobility group box 4, opposite strand                        | 3.398175 | 3.54506  | 3.339703 | 3.255886 | 4.119474 | 3.490902 |
| 17476998 | Hmgb1-ps7 | high-mobility group high mobility group box 1, pseudogene 7       | 42.50469 | 52.63826 | 47.09298 | 47.79209 | 62.52105 | 52.09453 |
| 17544149 | Hmgn5     | high-mobility group nucleosome binding domain 5                   | 23.31279 | 25.03683 | 24.55543 | 30.69943 | 32.34117 | 38.71632 |
| 17430307 | Hpca      | hippocalcin                                                       | 9.79829  | 9.79829  | 9.79829  | 11.03466 | 7.268361 | 11.6342  |
| 17274310 | Hpcal1    | hippocalcin-like 1                                                | 17.10291 | 21.53558 | 21.698   | 14.38965 | 26.60748 | 17.21161 |
| 17418158 | Hpcal4    | hippocalcin-like 4                                                | 5.374945 | 5.380574 | 5.615444 | 6.174404 | 4.525728 | 5.959908 |
| 17409721 | Hiat1     | hippocampus abundant gene transcript 1                            | 76.27826 | 97.23744 | 80.27562 | 82.08177 | 95.07736 | 86.80162 |
| 17293757 | Hiat1l    | hippocampus abundant transcript-like 1                            | 37.04251 | 33.01798 | 32.9743  | 32.80901 | 31.169   | 30.41898 |
| 17483165 | Hirip3    | HIRA interacting protein 3                                        | 4.84058  | 5.03468  | 4.353181 | 3.824948 | 5.131782 | 6.018317 |
| 17382203 | Hnmt      | histamine N-methyltransferase                                     | 54.85077 | 53.69255 | 50.46915 | 56.57842 | 45.60184 | 51.66517 |
| 17461888 | Hrh1      | histamine receptor H1                                             | 9.361307 | 9.361307 | 7.645442 | 9.361307 | 12.74545 | 10.47726 |
| 17287426 | Hrh2      | histamine receptor H2                                             | 5.49584  | 6.905711 | 7.527809 | 6.951094 | 6.150569 | 6.780962 |
| 17395499 | Hrh3      | histamine receptor H3                                             | 11.66399 | 14.73393 | 13.47142 | 15.41529 | 16.08061 | 14.22947 |
| 17348618 | Hrh4      | histamine receptor H4                                             | 2.67402  | 2.693029 | 2.67402  | 2.72962  | 3.287065 | 3.496884 |
| 17236552 | Hal       | histidine ammonia lyase                                           | 571.722  | 605.5406 | 557.7134 | 634.2642 | 632.4817 | 674.381  |
| 17391094 | Hdc       | histidine decarboxylase                                           | 10.43725 | 11.49967 | 9.196277 | 10.66876 | 7.706149 | 7.881389 |
| 17477774 | Hrc       | histidine rich calcium binding protein                            | 9.430864 | 7.22346  | 6.425996 | 9.711068 | 7.081574 | 8.438228 |
| 17413458 | Hrct1     | histidine rich carboxyl terminus 1                                | 17.73245 | 16.77627 | 20.2399  | 18.52549 | 15.64761 | 16.61483 |
| 17249780 | Hint1     | histidine triad nucleotide binding protein 1                      | 219.811  | 222.7405 | 217.4003 | 222.2439 | 242.0666 | 198.3961 |
| 17424782 | Hint2     | histidine triad nucleotide binding protein 2                      | 14.02521 | 16.62232 | 14.15235 | 16.69518 | 16.58952 | 16.66986 |
| 17240045 | Hint3     | histidine triad nucleotide binding protein 3                      | 35.89945 | 31.74594 | 30.44662 | 31.90875 | 32.42849 | 35.4364  |
| 17324344 | Hrg       | histidine-rich glycoprotein                                       | 1970.191 | 1897.179 | 1833.469 | 1819.315 | 1824.101 | 1891.166 |
| 17353765 | Hars      | histidyl-tRNA synthetase                                          | 100.0419 | 86.06651 | 78.98025 | 90.25219 | 104.4291 | 81.45267 |
| 17349774 | Hars2     | histidyl-tRNA synthetase 2, mitochondrial (putative)              | 24.82772 | 28.34181 | 24.20327 | 27.48266 | 27.36424 | 29.09864 |
| 17235136 | Hmha1     | histocompatibility (minor) HA-1                                   | 17.19384 | 17.19384 | 18.19689 | 13.43598 | 17.19384 | 16.95983 |
| 17377753 | H13       | histocompatibility 13                                             | 174.2204 | 153.5378 | 142.6731 | 140.1046 | 141.2013 | 123.224  |
| 17344578 | H2-BI     | histocompatibility 2, blastocyst                                  | 4.208686 | 5.466093 | 4.371808 | 4.987027 | 4.520085 | 5.075676 |
| 17343813 | H2-Aa     | histocompatibility 2, class II antigen A, alpha                   | 31.80166 | 31.44001 | 33.56347 | 24.47403 | 30.48928 | 29.14305 |
| 17336494 | H2-Ab1    | histocompatibility 2, class II antigen A, beta 1                  | 105.0222 | 79.4431  | 86.79801 | 70.54539 | 80.09443 | 77.87023 |
| 17343827 | H2-Ea-ps  | histocompatibility 2, class II antigen E alpha, pseudogene        | 3.325497 | 4.866923 | 3.817134 | 4.441848 | 3.073601 | 3.736118 |
| 17336502 | H2-Eb1    | histocompatibility 2, class II antigen E beta                     | 64.21908 | 55.19057 | 57.00909 | 42.52296 | 53.19357 | 56.36118 |
| 17336509 | H2-Eb2    | histocompatibility 2, class II antigen E beta2                    | 4.446684 | 3.820523 | 4.580135 | 3.656466 | 4.553481 | 3.856575 |
| 17336407 | H2-DMa    | histocompatibility 2, class II, locus DMa                         | 11.17111 | 11.9549  | 12.04915 | 11.50086 | 9.473516 | 11.66246 |
| 17336422 | H2-DMb1   | histocompatibility 2, class II, locus Mb1                         | 4.884836 | 3.695245 | 4.69622  | 4.20927  | 4.813079 | 3.128476 |
| 17336414 | H2-DMb2   | histocompatibility 2, class II, locus Mb2                         | 6.585578 | 6.889456 | 6.285903 | 6.889456 | 6.889456 | 6.170083 |
| 17337065 | H2-D1     | histocompatibility 2, D region locus 1                            | 16.80292 | 18.64284 | 20.83822 | 17.76776 | 20.13886 | 18.64284 |
| 17343703 | H2-K2     | histocompatibility 2, K region locus 2                            | 13.9434  | 19.17574 | 21.12457 | 18.29579 | 18.76679 | 17.79821 |
| 17343710 | H2-K1     | histocompatibility 2, K1, K region                                | 461.1621 | 492.2304 | 481.7497 | 428.5828 | 475.6346 | 481.009  |
| 17344757 | H2-M1     | histocompatibility 2, M region locus 1                            | 2.78433  | 2.239691 | 3.207991 | 2.960047 | 3.55902  | 2.735207 |
| 17344728 | H2-M10.1  | histocompatibility 2, M region locus 10.1                         | 26.257   | 25.30271 | 27.19086 | 28.34122 | 17.03571 | 24.06309 |
| 17344720 | H2-M10.2  | histocompatibility 2, M region locus 10.2                         | 2.913514 | 2.607234 | 2.506388 | 3.297151 | 4.156502 | 3.68877  |
| 17344736 | H2-M10.3  | histocompatibility 2, M region locus 10.3                         | 5.852528 | 6.27911  | 4.654319 | 4.556576 | 4.632561 | 4.872729 |
| 17344743 | H2-M10.4  | histocompatibility 2, M region locus 10.4                         | 3.403502 | 2.709488 | 2.979809 | 3.518499 | 3.117544 | 4.323501 |
| 17337427 | H2-M10.5  | histocompatibility 2, M region locus 10.5                         | 3.02371  | 3.015339 | 3.366338 | 2.606909 | 3.451874 | 3.222343 |
| 17337434 | H2-M10.6  | histocompatibility 2, M region locus 10.6                         | 2.821632 | 2.586695 | 2.809435 | 3.485462 | 3.623591 | 3.219106 |
| 17337411 | H2-M11    | histocompatibility 2, M region locus 11                           | 2.826409 | 2.55487  | 3.035323 | 2.652826 | 2.825566 | 2.5205   |
| 17344873 | H2-M2     | histocompatibility 2, M region locus 2                            | 5.456554 | 4.75093  | 5.771955 | 5.470869 | 6.70478  | 5.531114 |
| 17337557 | H2-M3     | histocompatibility 2, M region locus 3                            | 15.37303 | 15.27023 | 15.30997 | 18.04003 | 15.65238 | 16.90514 |
| 17344811 | H2-M5     | histocompatibility 2, M region locus 5                            | 8.237405 | 9.610757 | 8.512955 | 7.755609 | 8.512955 | 7.48914  |
| 17344750 | H2-M9     | histocompatibility 2, M region locus 9                            | 3.009972 | 3.464795 | 3.009972 | 2.886758 | 3.009972 | 2.773351 |
| 17336396 | H2-Oa     | histocompatibility 2, O region alpha locus                        | 6.700831 | 7.06652  | 6.38559  | 6.859769 | 6.318797 | 5.594077 |
| 17336476 | H2-Ob     | histocompatibility 2, O region beta locus                         | 6.171709 | 6.61926  | 5.429879 | 6.943774 | 6.775794 | 6.42849  |
| 17343755 | H2-Pb     | histocompatibility 2, P region beta locus                         | 3.223884 | 2.797717 | 2.588309 | 4.03028  | 3.339703 | 3.339703 |
| 17337089 | H2-Q1     | histocompatibility 2, Q region locus 1                            | 25.11818 | 34.42775 | 33.06401 | 36.65175 | 32.50816 | 44.14628 |
| 17337142 | H2-Q10    | histocompatibility 2, Q region locus 10                           | 42.97215 | 52.59122 | 57.93647 | 45.16803 | 43.31005 | 46.49456 |
| 17337100 | H2-Q4     | histocompatibility 2, Q region locus 4                            | 32.49442 | 26.98377 | 32.18909 | 32.49442 | 37.29447 | 32.58283 |
| 17337110 | H2-Q5     | histocompatibility 2, Q region locus 5                            | 8.607653 | 15.23925 | 13.75839 | 9.314317 | 9.310251 | 12.29645 |
| 17337118 | H2-Q5     | histocompatibility 2, Q region locus 5                            | 14.91229 | 12.78961 | 7.769329 | 5.924322 | 7.19358  | 9.037727 |
| 17337120 | H2-Q5     | histocompatibility 2, Q region locus 5                            | 668.3639 | 638.1006 | 677.1398 | 649.7676 | 640.5734 | 656.9319 |
| 17337133 | H2-Q7     | histocompatibility 2, Q region locus 7                            | 24.74663 | 23.10671 | 24.17761 | 21.29481 | 16.90034 | 11.24366 |
| 17337122 | H2-Q8     | histocompatibility 2, Q region locus 8                            | 51.80107 | 48.32273 | 54.69852 | 57.35113 | 48.90974 | 52.88585 |
| 17344642 | H2-T10    | histocompatibility 2, T region locus 10                           | 15.58212 | 14.27254 | 15.01029 | 26.11651 | 22.75829 | 25.43759 |
| 17344593 | H2-T22    | histocompatibility 2, T region locus 22                           | 124.7616 | 94.86342 | 130.2564 | 109.9611 | 104.8047 | 115.4945 |
| 17344568 | H2-T23    | histocompatibility 2, T region locus 23                           | 94.71034 | 81.2339  | 87.1241  | 95.20464 | 104.0692 | 102.8523 |
| 17344558 | H2-T24    | histocompatibility 2, T region locus 24                           | 10.2598  | 7.70193  | 11.43298 | 12.58096 | 5.777679 | 12.40836 |
| 17344608 | H2-T3     | histocompatibility 2, T region locus 3                            | 3.839478 | 3.492621 | 3.893371 | 5.239903 | 3.111607 | 4.116619 |
| 17232102 | H60b      | histocompatibility 60b                                            | 5.064711 | 4.355294 | 3.387263 | 4.79018  | 3.904831 | 4.724331 |
| 17238722 | H60c      | histocompatibility 60c                                            | 5.074058 | 4.545818 | 5.589968 | 4.109891 | 3.390787 | 4.863079 |
| 17371739 | Hat1      | histone aminotransferase 1                                        | 30.24742 | 22.45788 | 24.11953 | 24.68239 | 25.26275 | 25.88707 |
| 17323782 | Hira      | histone cell cycle regulation defective homolog A (S. cerevisiae) | 26.95816 | 33.7714  | 29.16103 | 27.37771 | 29.16103 | 26.56104 |
| 17285879 | Hist1h1a  | histone cluster 1, H1a                                            | 2.717029 | 3.030131 | 4.111743 | 2.953407 | 3.729055 | 2.703803 |
| 17291005 | Hist1h1b  | histone cluster 1, H1b                                            | 3.262731 | 2.162215 | 2.132758 | 2.328418 | 3.667508 | 2.396917 |
| 17285859 | Hist1h1c  | histone cluster 1, H1c                                            | 49.02888 | 31.0504  | 46.03662 | 44.78675 | 41.1691  | 34.22859 |
| 17285829 | Hist1h1d  | histone cluster 1, H1d                                            | 4.726591 | 4.50832  | 3.624068 | 5.208327 | 4.582707 | 4.689682 |
| 17285855 | Hist1h1t  | histone cluster 1, H1t                                            | 2.94862  | 3.84699  | 3.62447  | 3.916161 | 3.239206 | 3.193083 |
| 17285938 | Hist1h2aa | histone cluster 1, H2aa                                           | 12.16572 | 8.039635 | 12.50662 | 11.12659 | 6.225803 | 17.38776 |
| 17285867 | Hist1h2ab | histone cluster 1, H2ab                                           | 3.465347 | 4.353694 | 3.351879 | 2.490163 | 2.813527 | 3.682588 |
| 17291204 | Hist1h2ac | histone cluster 1, H2ac                                           | 5.23326  | 6.611053 | 5.083739 | 5.056328 | 5.896137 | 4.594921 |
| 17285838 | Hist1h2ad | histone cluster 1, H2ad                                           | 2.799308 | 2.248714 | 2.281828 | 2.42479  | 3.753483 | 2.143577 |
| 17291186 | Hist1h2ae | histone cluster 1, H2ae                                           | 2.67402  | 2.672463 | 2.557599 | 2.49258  | 2.366902 | 2.221355 |
| 17285819 | Hist1h2af | histone cluster 1, H2af                                           | 47.15504 | 63.02577 | 75.41032 | 55.49747 | 67.01165 | 77.48204 |
| 17291057 | Hist1h2ag | histone cluster 1, H2ag                                           | 3.865326 | 3.049029 | 2.24549  | 2.370596 | 2.91212  | 2.994386 |
| 17291049 | Hist1h2ah | histone cluster 1, H2ah                                           | 2.201001 | 2.049099 | 2.078338 | 1.874012 | 2.545608 | 2.248246 |

|          |              |                                                                                |          |          |          |          |          |          |
|----------|--------------|--------------------------------------------------------------------------------|----------|----------|----------|----------|----------|----------|
| 17285677 | Hist1h2ai    | histone cluster 1, H2ai                                                        | 2.269509 | 2.171377 | 2.868825 | 2.085799 | 2.297731 | 2.771928 |
| 17291001 | Hist1h2ak    | histone cluster 1, H2ak                                                        | 2.060051 | 2.060051 | 2.597349 | 1.78627  | 2.060051 | 2.024225 |
| 17292543 | Hist1h2al    | histone cluster 1, H2al                                                        | 4.392493 | 3.883991 | 4.212597 | 4.732361 | 6.030928 | 5.646669 |
| 17291012 | Hist1h2an    | histone cluster 1, H2an                                                        | 63.64962 | 89.44259 | 121.2121 | 84.20185 | 77.72032 | 83.75829 |
| 17285703 | Hist1h2ao    | histone cluster 1, H2ao                                                        | 69.33923 | 69.4465  | 83.39795 | 70.55958 | 79.52243 | 86.16977 |
| 17291023 | Hist1h2ao    | histone cluster 1, H2ao                                                        | 69.33923 | 69.4465  | 83.39795 | 70.55958 | 79.52243 | 86.16977 |
| 17291258 | Hist1h2ba    | histone cluster 1, H2ba                                                        | 2.167452 | 2.312382 | 1.804664 | 2.111883 | 1.813316 | 2.360185 |
| 17285863 | Hist1h2bb    | histone cluster 1, H2bb                                                        | 7.265842 | 7.698994 | 6.307682 | 5.275983 | 3.444752 | 6.110456 |
| 17285851 | Hist1h2bc    | histone cluster 1, H2bc                                                        | 1152.755 | 1006.806 | 1001.94  | 973.5289 | 984.5154 | 1021.144 |
| 17291195 | Hist1h2be    | histone cluster 1, H2be                                                        | 9.556948 | 10.22061 | 7.928621 | 11.32603 | 10.17002 | 11.52033 |
| 17291190 | Hist1h2bf    | histone cluster 1, H2bf                                                        | 10.82339 | 8.832734 | 9.310251 | 8.964729 | 6.90351  | 9.920824 |
| 17285834 | Hist1h2bg    | histone cluster 1, H2bg                                                        | 8.075099 | 13.39962 | 7.631571 | 9.764188 | 9.337394 | 13.78464 |
| 17291177 | Hist1h2bh    | histone cluster 1, H2bh                                                        | 2.199248 | 2.40204  | 3.286655 | 3.080704 | 5.341    | 2.719271 |
| 17285746 | Hist1h2bj    | histone cluster 1, H2bj                                                        | 2.995444 | 2.547708 | 2.154003 | 2.606909 | 3.200373 | 1.743214 |
| 17285742 | Hist1h2bk    | histone cluster 1, H2bk                                                        | 2.846837 | 4.72073  | 5.186819 | 4.682244 | 7.760341 | 4.757257 |
| 17290997 | Hist1h2bl    | histone cluster 1, H2bl                                                        | 376.3523 | 314.5226 | 359.7224 | 294.2462 | 243.0063 | 327.0257 |
| 17285683 | Hist1h2bm    | histone cluster 1, H2bm                                                        | 2.351759 | 2.690119 | 4.780959 | 2.844391 | 3.328956 | 2.299053 |
| 17285691 | Hist1h2bn    | histone cluster 1, H2bn                                                        | 310.6314 | 235.5991 | 289.2434 | 224.6943 | 218.1021 | 240.2096 |
| 17285696 | Hist1h2bp    | histone cluster 1, H2bp                                                        | 2.860743 | 3.780744 | 3.966345 | 3.733814 | 3.716875 | 3.608952 |
| 17285710 | Hist1h2bq    | histone cluster 1, H2bq                                                        | 9.123011 | 7.755501 | 8.295334 | 7.617301 | 6.27763  | 6.6928   |
| 17291014 | Hist1h2bq    | histone cluster 1, H2bq                                                        | 9.123011 | 7.755501 | 8.295334 | 7.617301 | 6.27763  | 6.6928   |
| 17291233 | Hist1h3a     | histone cluster 1, H3a                                                         | 2.255364 | 2.255364 | 2.255364 | 2.140919 | 2.462698 | 1.938392 |
| 17285871 | Hist1h3b     | histone cluster 1, H3b                                                         | 3.937064 | 3.012915 | 3.435738 | 3.045375 | 3.435357 | 3.591608 |
| 17291222 | Hist1h3c     | histone cluster 1, H3c                                                         | 2.245256 | 2.25552  | 1.907046 | 2.301445 | 3.269319 | 2.317244 |
| 17285842 | Hist1h3d     | histone cluster 1, H3d                                                         | 3.452975 | 3.040545 | 2.962202 | 3.915075 | 3.316565 | 2.629503 |
| 17291183 | Hist1h3e     | histone cluster 1, H3e                                                         | 3.470973 | 2.67402  | 3.060739 | 2.990942 | 2.360169 | 3.043835 |
| 17285825 | Hist1h3f     | histone cluster 1, H3f                                                         | 2.719912 | 2.026682 | 2.255364 | 2.255364 | 2.608535 | 2.099171 |
| 17285821 | Hist1h3g     | histone cluster 1, H3g                                                         | 1.942857 | 2.253707 | 2.228526 | 2.161511 | 2.476736 | 1.878707 |
| 17285680 | Hist1h3h     | histone cluster 1, H3h                                                         | 18.16312 | 16.16935 | 15.74596 | 16.90444 | 16.16935 | 14.76849 |
| 17291008 | Hist1h3i     | histone cluster 1, H3i                                                         | 2.769624 | 1.996454 | 2.52699  | 2.038249 | 1.88956  | 2.479931 |
| 17291229 | Hist1h4a     | histone cluster 1, H4a                                                         | 2.888819 | 2.953407 | 3.091892 | 3.263862 | 3.558058 | 3.045396 |
| 17285875 | Hist1h4b     | histone cluster 1, H4b                                                         | 2.429248 | 2.981379 | 2.346483 | 2.047694 | 2.281433 | 2.666413 |
| 17291208 | Hist1h4c     | histone cluster 1, H4c                                                         | 3.751766 | 3.216652 | 3.090307 | 3.157231 | 3.266917 | 2.959985 |
| 17285846 | Hist1h4d     | histone cluster 1, H4d                                                         | 4.519145 | 1.930133 | 2.992705 | 2.387201 | 3.79216  | 2.704628 |
| 17291180 | Hist1h4f     | histone cluster 1, H4f                                                         | 2.790744 | 2.768338 | 5.286563 | 3.579778 | 3.286404 | 2.640351 |
| 17285815 | Hist1h4h     | histone cluster 1, H4h                                                         | 2.990486 | 3.392973 | 3.397774 | 3.851125 | 2.505173 | 2.807177 |
| 17291053 | Hist1h4i     | histone cluster 1, H4i                                                         | 17.77146 | 24.23852 | 23.07886 | 20.40315 | 13.54661 | 22.65488 |
| 17285687 | Hist1h4j     | histone cluster 1, H4j                                                         | 2.411833 | 3.435881 | 3.157428 | 2.461623 | 2.835769 | 2.288592 |
| 17290999 | Hist1h4k     | histone cluster 1, H4k                                                         | 166.6538 | 155.3609 | 194.4142 | 140.9071 | 138.0943 | 168.4481 |
| 17285706 | Hist1h4m     | histone cluster 1, H4m                                                         | 6.262332 | 6.597823 | 8.171098 | 7.43679  | 7.43679  | 7.137209 |
| 17291019 | Hist1h4n     | histone cluster 1, H4n                                                         | 9.341408 | 13.15564 | 6.992896 | 6.272889 | 3.729055 | 4.475379 |
| 17400545 | Hist2h2aa1   | histone cluster 2, H2aa1                                                       | 312.2288 | 287.6658 | 345.7008 | 335.7492 | 382.83   | 404.7395 |
| 17408017 | Hist2h2aa2   | histone cluster 2, H2aa2                                                       | 312.2288 | 287.6658 | 345.7008 | 335.7492 | 382.83   | 404.7395 |
| 17400539 | Hist2h2ab    | histone cluster 2, H2ab                                                        | 3.422238 | 2.704028 | 2.877149 | 4.181382 | 3.863129 | 4.180223 |
| 17408011 | Hist2h2ac    | histone cluster 2, H2ac                                                        | 4.412206 | 6.503156 | 5.558671 | 8.118088 | 7.377592 | 4.924646 |
| 17400562 | Hist2h2bb    | histone cluster 2, H2bb                                                        | 4.547898 | 3.526898 | 3.828502 | 4.874824 | 3.424658 | 3.823887 |
| 17400541 | Hist2h2be    | histone cluster 2, H2be                                                        | 6.299337 | 6.997599 | 7.915772 | 3.644624 | 6.686541 | 5.748717 |
| 17400559 | Hist2h3b     | histone cluster 2, H3b                                                         | 4.38805  | 4.275313 | 4.045365 | 3.782238 | 4.014026 | 5.454663 |
| 17400555 | Hist2h3c2    | histone cluster 2, H3c2                                                        | 65.48579 | 60.7937  | 67.49132 | 62.16023 | 59.49432 | 59.49432 |
| 17408015 | Hist2h3c2    | histone cluster 2, H3c2                                                        | 5.942871 | 4.372808 | 4.246635 | 3.898178 | 5.823958 | 5.343704 |
| 17408021 | Hist2h4      | histone cluster 2, H4                                                          | 5.916894 | 5.389345 | 6.671541 | 4.681043 | 3.107792 | 4.15924  |
| 17250178 | Hist3h2a     | histone cluster 3, H2a                                                         | 3.061715 | 4.970462 | 5.722359 | 6.632671 | 3.867765 | 5.383819 |
| 17250162 | Hist3h2ba    | histone cluster 3, H2ba                                                        | 2.591325 | 2.692861 | 2.481049 | 2.083357 | 2.188921 | 3.098178 |
| 17263218 | Hist3h2bb-ps | histone cluster 3, H2bb, pseudogene                                            | 2.127988 | 2.089373 | 2.012669 | 2.089373 | 1.975366 | 2.053038 |
| 17472159 | Hist4h4      | histone cluster 4, H4                                                          | 5.788743 | 4.303469 | 4.844138 | 4.326229 | 4.844138 | 5.358577 |
| 17548561 | Hist4h4      | histone cluster 4, H4                                                          | 19.51985 | 10.32142 | 14.54529 | 16.75082 | 12.37254 | 14.44472 |
| 17430397 | Hdac1        | histone deacetylase 1                                                          | 77.46324 | 52.24025 | 51.28447 | 49.62104 | 36.33858 | 56.60196 |
| 17320279 | Hdac10       | histone deacetylase 10                                                         | 19.81196 | 23.88247 | 20.24958 | 27.63932 | 23.26888 | 16.23708 |
| 17460879 | Hdac11       | histone deacetylase 11                                                         | 42.67088 | 51.26456 | 45.53835 | 44.50236 | 44.54742 | 46.68153 |
| 17232560 | Hdac2        | histone deacetylase 2                                                          | 42.89686 | 41.15598 | 37.50757 | 43.6612  | 51.38837 | 46.95087 |
| 17353839 | Hdac3        | histone deacetylase 3                                                          | 72.8946  | 89.13561 | 92.45632 | 84.65715 | 82.53762 | 77.54866 |
| 17225531 | Hdac4        | histone deacetylase 4                                                          | 22.5693  | 21.52349 | 15.8299  | 16.07793 | 18.36058 | 20.00918 |
| 17225535 | Hdac4        | histone deacetylase 4                                                          | 29.1275  | 26.58223 | 31.82768 | 32.53679 | 25.30236 | 26.36715 |
| 17270082 | Hdac5        | histone deacetylase 5                                                          | 32.37998 | 49.87794 | 58.11586 | 45.70943 | 40.59922 | 46.65695 |
| 17539932 | Hdac6        | histone deacetylase 6                                                          | 29.24869 | 27.48057 | 36.48395 | 32.62622 | 32.0953  | 33.06287 |
| 17321046 | Hdac7        | histone deacetylase 7                                                          | 13.6415  | 13.5545  | 19.18424 | 11.54055 | 14.29818 | 13.47899 |
| 17543675 | Hdac8        | histone deacetylase 8                                                          | 12.08462 | 12.5343  | 15.01601 | 18.53641 | 14.31316 | 13.84574 |
| 17280689 | Hdac9        | histone deacetylase 9                                                          | 5.402511 | 6.698323 | 5.7632   | 5.991719 | 5.50354  | 5.725216 |
| 17255314 | Hils1        | histone H1-like protein in spermatids 1                                        | 6.201039 | 5.414695 | 5.613809 | 6.000697 | 4.461133 | 5.652817 |
| 17526195 | Hinfp        | histone H4 transcription factor                                                | 17.39186 | 14.37958 | 16.93528 | 11.00395 | 14.37958 | 14.37958 |
| 17535018 | Htatsf1      | HIV TAT specific factor 1                                                      | 17.39125 | 17.39125 | 17.39125 | 14.34782 | 19.04249 | 17.67122 |
| 17478352 | Htatip2      | HIV-1 tat interactive protein 2, homolog (human)                               | 72.96234 | 94.36108 | 91.12026 | 91.2043  | 66.19315 | 72.96234 |
| 17354703 | Hmgxb3       | HMG box domain containing 3                                                    | 29.97484 | 33.14616 | 28.09439 | 25.18024 | 30.09037 | 28.21069 |
| 17502537 | Hmgxb4       | HMG box domain containing 4                                                    | 10.88146 | 12.99919 | 14.60692 | 16.16689 | 9.598507 | 11.82903 |
| 17451629 | Hnf1a        | HNFI homeobox A                                                                | 32.25878 | 28.51521 | 30.71092 | 29.23896 | 34.36124 | 33.61679 |
| 17441072 | Hnf1aosl     | HNFI homeobox A, opposite strand 1                                             | 18.42944 | 16.32487 | 13.19482 | 20.24874 | 13.19482 | 15.81213 |
| 17254332 | Hnf1b        | HNFI homeobox B                                                                | 33.27623 | 26.76118 | 26.26428 | 32.05372 | 25.69971 | 25.22898 |
| 17378272 | Raly         | hnRNP-associated with lethal yellow                                            | 55.24569 | 62.99695 | 52.45797 | 50.39994 | 55.06371 | 48.11217 |
| 17225329 | Hjurp        | Holliday junction recognition protein                                          | 63.16879 | 82.62807 | 69.5144  | 78.30432 | 66.24961 | 76.47043 |
| 17332299 | Hlcs         | holocarboxylase synthetase (biotin- [propionyl-Coenzyme A-carboxylase (ATP-hyd | 16.14886 | 15.47846 | 16.42737 | 15.52262 | 18.02366 | 16.46728 |
| 17546192 | Hccs         | holocytochrome c synthetase                                                    | 60.9059  | 42.7055  | 45.89452 | 53.93762 | 48.3167  | 47.06067 |
| 17466798 | Hoxa1        | homeobox A1                                                                    | 3.339703 | 3.339703 | 3.276919 | 3.339703 | 3.339703 | 3.339703 |
| 17466878 | Hoxa10       | homeobox A10                                                                   | 4.33788  | 4.206062 | 4.363513 | 4.206062 | 3.880655 | 4.600211 |
| 17466887 | Hoxa11       | homeobox A11                                                                   | 4.537004 | 4.450816 | 4.235523 | 4.235523 | 3.729055 | 4.980394 |

|          |          |                                                                                       |          |          |          |          |          |          |
|----------|----------|---------------------------------------------------------------------------------------|----------|----------|----------|----------|----------|----------|
| 17458616 | Hoxa11os | homeobox A11, opposite strand                                                         | 2.699646 | 4.457331 | 2.749921 | 2.989077 | 3.940531 | 3.065197 |
| 17466894 | Hoxa13   | homeobox A13                                                                          | 6.865097 | 7.57812  | 7.57812  | 9.951679 | 7.57812  | 8.417548 |
| 17466805 | Hoxa2    | homeobox A2                                                                           | 4.643009 | 4.299116 | 4.657288 | 3.840968 | 4.680946 | 5.09849  |
| 17466812 | Hoxa3    | homeobox A3                                                                           | 4.034948 | 4.20927  | 5.285207 | 3.720509 | 4.20927  | 4.136068 |
| 17466827 | Hoxa4    | homeobox A4                                                                           | 17.49341 | 16.33382 | 11.59901 | 10.77518 | 17.07377 | 12.53917 |
| 17466833 | Hoxa5    | homeobox A5                                                                           | 4.437017 | 4.402369 | 4.819154 | 4.15924  | 3.362047 | 4.631983 |
| 17466838 | Hoxa6    | homeobox A6                                                                           | 10.0005  | 10.80689 | 9.627025 | 11.24709 | 9.301478 | 10.34341 |
| 17466845 | Hoxa7    | homeobox A7                                                                           | 3.077588 | 3.718756 | 3.72167  | 4.308812 | 4.55446  | 3.287657 |
| 17466863 | Hoxa9    | homeobox A9                                                                           | 4.557808 | 4.008604 | 4.647678 | 3.789585 | 3.423471 | 3.756164 |
| 17466874 | Hoxa9    | homeobox A9                                                                           | 5.503235 | 5.503235 | 5.945549 | 6.589961 | 5.083457 | 6.189745 |
| 17255620 | Hoxb1    | homeobox B1                                                                           | 12.08596 | 14.63388 | 10.98658 | 14.31296 | 12.08596 | 13.77996 |
| 17255534 | Hoxb13   | homeobox B13                                                                          | 4.015278 | 3.74073  | 4.722497 | 4.109777 | 3.118582 | 5.652464 |
| 17255614 | Hoxb2    | homeobox B2                                                                           | 3.367365 | 3.388014 | 3.026793 | 4.112199 | 3.388014 | 3.53826  |
| 17255604 | Hoxb3    | homeobox B3                                                                           | 7.831127 | 4.90244  | 5.975544 | 6.002652 | 6.002652 | 6.63773  |
| 17255594 | Hoxb4    | homeobox B4                                                                           | 8.027329 | 6.992896 | 8.460835 | 5.990058 | 6.923733 | 7.169189 |
| 17255588 | Hoxb5    | homeobox B5                                                                           | 9.31109  | 7.143693 | 7.156281 | 7.706095 | 7.443546 | 7.709301 |
| 17268313 | Hoxb5os  | homeobox B5 and homeobox B6, opposite strand                                          | 14.75263 | 15.34227 | 14.61218 | 14.31296 | 14.31296 | 14.31296 |
| 17255581 | Hoxb6    | homeobox B6                                                                           | 4.514981 | 5.26371  | 4.374566 | 4.919938 | 4.4624   | 4.478296 |
| 17255572 | Hoxb7    | homeobox B7                                                                           | 3.254329 | 3.06335  | 3.351925 | 3.153185 | 4.556891 | 3.555149 |
| 17255565 | Hoxb8    | homeobox B8                                                                           | 6.209728 | 5.148207 | 5.870771 | 7.029977 | 7.041047 | 9.446828 |
| 17255558 | Hoxb9    | homeobox B9                                                                           | 6.405939 | 10.66713 | 8.402566 | 10.96603 | 10.68481 | 13.09333 |
| 17315500 | Hoxc10   | homeobox C10                                                                          | 8.436824 | 6.820228 | 6.394582 | 7.730062 | 9.622688 | 8.392787 |
| 17315495 | Hoxc11   | homeobox C11                                                                          | 3.819755 | 3.819755 | 3.221718 | 3.819755 | 3.912769 | 4.546984 |
| 17315490 | Hoxc12   | homeobox C12                                                                          | 7.022039 | 8.769898 | 7.096413 | 7.920162 | 7.890955 | 8.297921 |
| 17315485 | Hoxc13   | homeobox C13                                                                          | 4.616086 | 6.353009 | 4.832836 | 4.56625  | 6.850266 | 5.676887 |
| 17315538 | Hoxc4    | homeobox C4                                                                           | 6.171709 | 6.171709 | 5.946868 | 6.171709 | 5.726406 | 5.955241 |
| 17315530 | Hoxc5    | homeobox C5                                                                           | 3.753353 | 3.515476 | 2.390943 | 3.873264 | 4.069524 | 3.753353 |
| 17315519 | Hoxc6    | homeobox C6                                                                           | 3.927551 | 3.785464 | 3.927551 | 4.028716 | 3.927551 | 3.466765 |
| 17315514 | Hoxc8    | homeobox C8                                                                           | 4.638634 | 4.672129 | 5.017122 | 5.128653 | 5.548701 | 4.551462 |
| 17315507 | Hoxc9    | homeobox C9                                                                           | 4.744809 | 4.634745 | 3.702141 | 5.126059 | 5.120306 | 5.060535 |
| 17307709 | Hmbx1    | homeobox containing 1                                                                 | 35.99913 | 33.94436 | 37.84891 | 29.1166  | 31.96076 | 38.39882 |
| 17372114 | Hoxd1    | homeobox D1                                                                           | 4.854558 | 5.293603 | 4.794299 | 4.681043 | 4.681043 | 4.681043 |
| 17372054 | Hoxd10   | homeobox D10                                                                          | 10.07781 | 12.29262 | 13.45164 | 10.2684  | 11.00678 | 12.0489  |
| 17372045 | Hoxd11   | homeobox D11                                                                          | 4.442156 | 4.479973 | 4.132658 | 4.450971 | 4.533641 | 4.51639  |
| 17372039 | Hoxd12   | homeobox D12                                                                          | 6.663869 | 7.089383 | 6.61637  | 5.131925 | 7.532924 | 6.672836 |
| 17372035 | Hoxd13   | homeobox D13                                                                          | 5.506211 | 4.019873 | 4.701887 | 5.875412 | 3.676441 | 4.93695  |
| 17372080 | Hoxd3    | homeobox D3                                                                           | 5.965694 | 5.256199 | 5.050653 | 4.68299  | 5.284731 | 4.834578 |
| 17386672 | Hoxd3os1 | homeobox D3, opposite strand 1                                                        | 10.81424 | 11.26769 | 13.18687 | 13.78579 | 11.03137 | 11.81076 |
| 17372092 | Hoxd4    | homeobox D4                                                                           | 10.5647  | 21.05951 | 17.34238 | 17.85109 | 17.74536 | 18.81524 |
| 17372072 | Hoxd8    | homeobox D8                                                                           | 14.57749 | 10.48089 | 10.66876 | 10.10201 | 13.19482 | 13.65824 |
| 17372066 | Hoxd9    | homeobox D9                                                                           | 2.46444  | 3.624369 | 2.653414 | 4.450662 | 3.790163 | 3.58154  |
| 17298014 | Hesx1    | homeobox gene expressed in ES cells                                                   | 3.042274 | 3.443463 | 2.58553  | 2.822728 | 2.822728 | 3.193548 |
| 17408662 | Hipk1    | homeodomain interacting protein kinase 1                                              | 120.9544 | 142.4745 | 159.0427 | 131.6743 | 139.4873 | 131.9758 |
| 17466033 | Hipk2    | homeodomain interacting protein kinase 2                                              | 154.0377 | 174.0153 | 222.2901 | 158.0142 | 110.8635 | 127.1625 |
| 17388931 | Hipk3    | homeodomain interacting protein kinase 3                                              | 175.7718 | 184.5464 | 183.0203 | 164.6593 | 183.9054 | 199.4758 |
| 17475616 | Hipk4    | homeodomain interacting protein kinase 4                                              | 5.191891 | 5.091356 | 4.789317 | 5.062711 | 4.887477 | 4.66915  |
| 17306491 | Homez    | homeodomain leucine zipper-encoding gene                                              | 4.602475 | 3.973582 | 4.850825 | 3.942443 | 4.216658 | 4.722563 |
| 17289137 | Homer1   | homer homolog 1 (Drosophila)                                                          | 16.13867 | 11.31073 | 12.20212 | 11.89596 | 13.63375 | 13.36761 |
| 17492826 | Homer2   | homer homolog 2 (Drosophila)                                                          | 24.64392 | 22.44979 | 29.79875 | 31.27504 | 31.89437 | 22.78938 |
| 17501877 | Homer3   | homer homolog 3 (Drosophila)                                                          | 3.499212 | 3.729055 | 3.815706 | 3.729055 | 3.729055 | 5.042817 |
| 17504005 | Herpud1  | homocysteine-inducible, endoplasmic reticulum stress-inducible, ubiquitin-like domain | 1078.702 | 705.5233 | 633.0695 | 622.7287 | 798.6392 | 839.5195 |
| 17325497 | Hgd      | homogentisate 1, 2-dioxygenase                                                        | 814.5277 | 934.3181 | 934.2663 | 997.8022 | 906.1399 | 1114.322 |
| 17415570 | Hook1    | hook homolog 1 (Drosophila)                                                           | 98.12644 | 79.45521 | 71.23923 | 74.33914 | 97.42904 | 79.3193  |
| 17503300 | Hook2    | hook homolog 2 (Drosophila)                                                           | 18.67362 | 27.55878 | 24.67657 | 19.97813 | 27.21236 | 28.07122 |
| 17508482 | Hook3    | hook homolog 3 (Drosophila)                                                           | 77.41762 | 78.51737 | 74.76598 | 85.91809 | 74.54708 | 87.50418 |
| 17449052 | Hopx     | HOP homeobox                                                                          | 11.04989 | 15.76027 | 10.99519 | 16.22841 | 11.79759 | 14.01986 |
| 17438482 | Hopxos   | HOP homeobox, opposite strand                                                         | 6.287864 | 6.639065 | 6.287864 | 6.287864 | 5.141502 | 6.817818 |
| 17400386 | Hormad1  | HORMA domain containing 1                                                             | 2.598178 | 2.909114 | 2.472293 | 2.37614  | 2.465004 | 2.51333  |
| 17259975 | Hormad2  | HORMA domain containing 2                                                             | 3.197136 | 3.755018 | 3.163233 | 3.245678 | 3.088936 | 4.394351 |
| 17326964 | Hunk     | hormonally upregulated Neu-associated kinase                                          | 15.72905 | 14.33232 | 17.18633 | 17.79845 | 15.5337  | 10.92847 |
| 17399972 | Hmr      | homerin                                                                               | 2.776428 | 2.719271 | 2.483492 | 2.211431 | 2.719271 | 2.719271 |
| 17542516 | Hcfc1    | host cell factor C1                                                                   | 94.0809  | 81.92433 | 78.11242 | 75.01879 | 81.06572 | 76.71517 |
| 17334091 | Hcfc1r1  | host cell factor C1 regulator 1 (XPO1-dependent)                                      | 43.86049 | 55.57946 | 67.83839 | 50.4765  | 67.64447 | 54.33576 |
| 17235890 | Hcfc2    | host cell factor C2                                                                   | 26.00667 | 22.57494 | 22.03401 | 21.84211 | 22.82796 | 22.86074 |
| 17322309 | Hotair   | HOX transcript antisense RNA (non-protein coding)                                     | 4.762998 | 4.681043 | 4.681043 | 5.217794 | 4.681043 | 4.20927  |
| 17458587 | Halr1    | Hoxa adjacent long noncoding RNA 1                                                    | 3.270815 | 3.270815 | 3.270815 | 2.636036 | 3.270815 | 3.270815 |
| 17458598 | Hoxaas2  | Hoxa cluster antisense RNA 2                                                          | 13.17892 | 12.98829 | 14.55568 | 13.71279 | 12.08939 | 15.52681 |
| 17458605 | Hoxaas3  | Hoxa cluster antisense RNA 3                                                          | 5.669337 | 5.300432 | 6.287864 | 4.20927  | 4.676373 | 4.816483 |
| 17458626 | Hottip   | Hoxa distal transcript antisense RNA                                                  | 3.673156 | 3.637583 | 3.772942 | 4.027431 | 3.432524 | 4.381151 |
| 17458592 | Hotairm1 | Hoxa transcript antisense RNA, myeloid-specific 1                                     | 5.071772 | 5.675116 | 4.63041  | 6.84272  | 5.953632 | 6.191419 |
| 17386679 | Haglr    | Hoxd antisense growth associated long non-coding RNA                                  | 4.079211 | 3.686802 | 3.931364 | 3.686802 | 4.109691 | 3.686802 |
| 17324576 | Hrasls   | HRAS-like suppressor                                                                  | 4.546984 | 5.537136 | 5.586443 | 6.69461  | 6.566206 | 7.565996 |
| 17357083 | Hrasls5  | HRAS-like suppressor family, member 5                                                 | 4.26321  | 3.916487 | 4.21809  | 4.266314 | 4.14531  | 4.226636 |
| 17451171 | Hscb     | HscB iron-sulfur cluster co-chaperone homolog (E. coli)                               | 9.827606 | 8.789554 | 10.72146 | 11.32917 | 11.14311 | 13.15446 |
| 17485880 | Hspbp1   | HSPA (heat shock 70kDa) binding protein, cytoplasmic cochaperone 1                    | 46.62914 | 44.24278 | 51.24538 | 46.34912 | 40.34338 | 46.73009 |
| 17325261 | Hspbap1  | Hspb associated protein 1                                                             | 8.793759 | 8.865303 | 8.730414 | 8.762849 | 8.488973 | 9.173931 |
| 17483912 | Htra1    | HtrA serine peptidase 1                                                               | 8.962803 | 10.71723 | 9.666476 | 8.765826 | 10.36142 | 10.97889 |
| 17468075 | Htra2    | HtrA serine peptidase 2                                                               | 40.56124 | 36.86526 | 40.01974 | 34.79529 | 47.51595 | 35.81272 |
| 17447365 | Htra3    | HtrA serine peptidase 3                                                               | 9.372604 | 11.11511 | 8.995977 | 10.5356  | 10.21799 | 13.00983 |
| 17508325 | Htra4    | HtrA serine peptidase 4                                                               | 5.295181 | 5.336967 | 5.746247 | 6.840302 | 6.155005 | 5.675471 |
| 17286818 | Hivp1    | human immunodeficiency virus type I enhancer binding protein 1                        | 51.64225 | 56.01573 | 65.6444  | 64.75816 | 58.4216  | 60.82785 |
| 17231742 | Hivp2    | human immunodeficiency virus type I enhancer binding protein 2                        | 15.80676 | 14.13226 | 22.00943 | 18.65965 | 14.35867 | 17.80092 |
| 17231754 | Hivp2    | human immunodeficiency virus type I enhancer binding protein 2                        | 11.04131 | 9.729259 | 10.41665 | 11.46965 | 9.851955 | 12.45074 |
| 17417952 | Hivp3    | human immunodeficiency virus type I enhancer binding protein 3                        | 7.764376 | 8.815424 | 8.533396 | 8.418248 | 8.276266 | 8.203616 |

|          |          |                                                                              |          |          |          |          |          |          |
|----------|----------|------------------------------------------------------------------------------|----------|----------|----------|----------|----------|----------|
| 17436683 | Htt      | huntingtin                                                                   | 41.58093 | 41.73165 | 41.3768  | 41.43305 | 30.2384  | 41.56681 |
| 17453573 | Hip1     | huntingtin interacting protein 1                                             | 20.00918 | 27.51316 | 26.95872 | 20.03596 | 19.91826 | 16.4683  |
| 17442428 | Hip1r    | huntingtin interacting protein 1 related                                     | 27.77028 | 27.73854 | 30.29232 | 27.3485  | 27.53835 | 24.02892 |
| 17375298 | Hypk     | huntingtin interacting protein K                                             | 24.82772 | 19.65862 | 22.94312 | 22.94312 | 25.45523 | 23.25872 |
| 17533226 | Hypm     | huntingtin interacting protein M                                             | 5.671066 | 6.204135 | 5.590665 | 6.163501 | 7.038412 | 8.769898 |
| 17269439 | Hap1     | huntingtin-associated protein 1                                              | 11.75156 | 14.10808 | 13.08489 | 14.10808 | 14.10808 | 17.42202 |
| 17260579 | Hus1     | Hus1 homolog (S. pombe)                                                      | 13.86014 | 12.21879 | 13.66402 | 15.02236 | 11.66432 | 18.97963 |
| 17291609 | Hus1b    | Hus1 homolog b (S. pombe)                                                    | 3.933899 | 4.801649 | 4.724429 | 4.344921 | 4.417438 | 4.255563 |
| 17289009 | Hapln1   | hyaluronan and proteoglycan link protein 1                                   | 4.98295  | 4.208395 | 4.806478 | 5.368615 | 4.170817 | 8.688457 |
| 17406646 | Hapln2   | hyaluronan and proteoglycan link protein 2                                   | 6.992896 | 6.840302 | 6.992896 | 8.314964 | 10.12577 | 7.698994 |
| 17492305 | Hapln3   | hyaluronan and proteoglycan link protein 3                                   | 7.656314 | 7.326784 | 7.301182 | 6.734963 | 7.069166 | 7.438182 |
| 17501800 | Hapln4   | hyaluronan and proteoglycan link protein 4                                   | 13.69711 | 9.936584 | 15.28972 | 13.77538 | 9.145487 | 10.4085  |
| 17261840 | Hmmr     | hyaluronan mediated motility receptor (RHAMM)                                | 3.188593 | 2.454348 | 3.185832 | 2.946455 | 2.929268 | 3.105876 |
| 17317167 | Has2     | hyaluronan synthase 2                                                        | 4.47107  | 5.036634 | 5.48933  | 5.971031 | 5.323887 | 5.556398 |
| 17311633 | Has2os   | hyaluronan synthase 2, opposite strand                                       | 2.560579 | 3.164571 | 2.887378 | 3.20004  | 4.23159  | 2.864652 |
| 17505191 | Has3     | hyaluronan synthase 3                                                        | 8.099765 | 7.107588 | 9.078098 | 6.509064 | 6.952877 | 7.018584 |
| 17341269 | Has1     | hyaluronan synthase1                                                         | 7.225313 | 6.238158 | 6.617746 | 6.394449 | 7.556457 | 6.576135 |
| 17360537 | Habp2    | hyaluronic acid binding protein 2                                            | 350.6991 | 344.5835 | 337.464  | 325.2714 | 379.288  | 342.6448 |
| 17288145 | Habp4    | hyaluronic acid binding protein 4                                            | 101.7468 | 89.9443  | 83.64863 | 96.33446 | 109.6833 | 87.80067 |
| 17521428 | Hyal1    | hyaluronoglucosaminidase 1                                                   | 125.9956 | 132.6545 | 151.0696 | 125.4875 | 101.2052 | 103.2609 |
| 17521422 | Hyal2    | hyaluronoglucosaminidase 2                                                   | 59.51577 | 58.57    | 62.98167 | 58.55052 | 56.16307 | 57.58296 |
| 17521448 | Hyal3    | hyaluronoglucosaminidase 3                                                   | 8.349617 | 10.62669 | 8.754532 | 6.171709 | 6.788204 | 5.669455 |
| 17456440 | Hyal4    | hyaluronoglucosaminidase 4                                                   | 3.643841 | 2.999641 | 2.764484 | 3.585241 | 2.733274 | 3.732908 |
| 17456460 | Hyal5    | hyaluronoglucosaminidase 5                                                   | 2.67402  | 2.557173 | 3.227126 | 2.642274 | 2.287022 | 2.628045 |
| 17456434 | Hyal6    | hyaluronoglucosaminidase 6                                                   | 2.917212 | 3.52905  | 2.987151 | 3.748075 | 2.648104 | 4.099534 |
| 17505505 | Hydin    | HYDIN, axonemal central pair apparatus protein                               | 5.45905  | 5.523183 | 5.48933  | 5.48933  | 6.156882 | 5.563875 |
| 17452709 | Hcar1    | hydrocarboxylic acid receptor 1                                              | 13.19427 | 10.50359 | 11.37701 | 13.95007 | 12.77534 | 11.35795 |
| 17442046 | Hvcn1    | hydrogen voltage-gated channel 1                                             | 9.926465 | 8.649879 | 9.710328 | 9.051708 | 8.522697 | 8.592989 |
| 17525418 | Hyls1    | hydroletharus syndrome 1                                                     | 8.800772 | 10.9494  | 11.67508 | 9.700304 | 9.822839 | 8.912252 |
| 17392076 | Hao1     | hydroxyacid oxidase 1, liver                                                 | 339.517  | 205.3655 | 191.1631 | 226.6151 | 267.4175 | 190.8665 |
| 17408360 | Hao2     | hydroxyacid oxidase 2                                                        | 4.013915 | 2.903393 | 3.777076 | 4.536218 | 3.243789 | 3.789191 |
| 17334449 | Hagh     | hydroxyacyl glutathione hydrolase                                            | 272.7755 | 229.7275 | 203.5924 | 219.7151 | 240.6162 | 257.4449 |
| 17410390 | Hadh     | hydroxyacyl-Coenzyme A dehydrogenase                                         | 956.1877 | 1142.113 | 1163.625 | 1082.567 | 1018.394 | 1157.92  |
| 17446643 | Hadha    | hydroxyacyl-Coenzyme A dehydrogenase/3-ketoacyl-Coenzyme A thiolase/enoyl-C  | 1133.399 | 1074.813 | 1032.911 | 944.358  | 853.1408 | 819.3125 |
| 17374053 | Hadhb    | hydroxyacyl-Coenzyme A dehydrogenase/3-ketoacyl-Coenzyme A thiolase/enoyl-C  | 408.6721 | 423.2628 | 399.6131 | 372.1886 | 304.4645 | 326.4368 |
| 17435748 | Hadhb    | hydroxyacyl-Coenzyme A dehydrogenase/3-ketoacyl-Coenzyme A thiolase/enoyl-C  | 11.94546 | 10.06601 | 13.06224 | 10.94348 | 11.02235 | 8.94028  |
| 17342359 | Haghl    | hydroxyacylglutathione hydrolase-like                                        | 12.05701 | 11.6967  | 12.77145 | 13.69427 | 14.51115 | 14.37958 |
| 17452705 | Hcar2    | hydroxycarboxylic acid receptor 2                                            | 6.808703 | 7.104534 | 6.808703 | 7.034218 | 6.99435  | 6.505094 |
| 17408352 | Hsd3b1   | hydroxy-delta-5-steroid dehydrogenase, 3 beta- and steroid delta-isomerase 1 | 4.033354 | 2.737009 | 2.486575 | 3.54113  | 2.320346 | 2.752571 |
| 17408323 | Hsd3b2   | hydroxy-delta-5-steroid dehydrogenase, 3 beta- and steroid delta-isomerase 2 | 42.71942 | 32.95693 | 17.33925 | 36.44275 | 22.33462 | 32.71703 |
| 17408336 | Hsd3b3   | hydroxy-delta-5-steroid dehydrogenase, 3 beta- and steroid delta-isomerase 3 | 195.2921 | 121.9765 | 99.76764 | 189.8387 | 141.7338 | 160.9301 |
| 17408297 | Hsd3b4   | hydroxy-delta-5-steroid dehydrogenase, 3 beta- and steroid delta-isomerase 4 | 16.22605 | 6.009229 | 6.088724 | 7.698994 | 7.548186 | 6.055936 |
| 17408306 | Hsd3b4   | hydroxy-delta-5-steroid dehydrogenase, 3 beta- and steroid delta-isomerase 4 | 16.22605 | 6.009229 | 6.088724 | 7.698994 | 7.548186 | 6.055936 |
| 17408315 | Hsd3b5   | hydroxy-delta-5-steroid dehydrogenase, 3 beta- and steroid delta-isomerase 5 | 8.320672 | 2.572106 | 2.611358 | 3.276033 | 4.049433 | 2.781668 |
| 17408345 | Hsd3b6   | hydroxy-delta-5-steroid dehydrogenase, 3 beta- and steroid delta-isomerase 6 | 2.902327 | 2.519854 | 2.793144 | 3.54801  | 2.822982 | 3.104326 |
| 17483471 | Hsd3b7   | hydroxy-delta-5-steroid dehydrogenase, 3 beta- and steroid delta-isomerase 7 | 262.4611 | 251.1821 | 229.5795 | 264.6111 | 251.0899 | 287.7895 |
| 17517448 | Hykk     | hydroxyllysine kinase 1                                                      | 287.7596 | 280.808  | 316.9607 | 320.1224 | 278.2234 | 395.7869 |
| 17526225 | Hmbs     | hydroxymethylbilane synthase                                                 | 59.8297  | 53.41711 | 55.69284 | 64.1639  | 59.79281 | 55.84747 |
| 17501250 | Hpgd     | hydroxyprostaglandin dehydrogenase 15 (NAD)                                  | 392.2936 | 427.3517 | 334.0268 | 410.5574 | 345.6576 | 523.0373 |
| 17417738 | Hyi      | hydroxypyruvate isomerase homolog (E. coli)                                  | 112.3511 | 107.6049 | 92.75223 | 107.5505 | 133.9471 | 159.5838 |
| 17256513 | Hsd17b1  | hydroxysteroid (17-beta) dehydrogenase 1                                     | 6.251013 | 7.592053 | 7.573447 | 6.721066 | 7.137704 | 7.169189 |
| 17538852 | Hsd17b10 | hydroxysteroid (17-beta) dehydrogenase 10                                    | 104.1725 | 109.2319 | 122.9945 | 141.2278 | 121.4038 | 128.5281 |
| 17450366 | Hsd17b11 | hydroxysteroid (17-beta) dehydrogenase 11                                    | 406.57   | 491.099  | 440.1923 | 390.3731 | 270.5966 | 330.8997 |
| 17388573 | Hsd17b12 | hydroxysteroid (17-beta) dehydrogenase 12                                    | 209.4337 | 187.3095 | 152.1742 | 171.4222 | 156.9118 | 169.8585 |
| 17450354 | Hsd17b13 | hydroxysteroid (17-beta) dehydrogenase 13                                    | 947.7351 | 886.9629 | 909.7208 | 806.5835 | 791.8042 | 752.0527 |
| 17477884 | Hsd17b14 | hydroxysteroid (17-beta) dehydrogenase 14                                    | 5.719504 | 5.719504 | 6.352656 | 6.227314 | 5.70521  | 5.889479 |
| 17506030 | Hsd17b2  | hydroxysteroid (17-beta) dehydrogenase 2                                     | 370.8881 | 327.0483 | 225.173  | 323.7912 | 344.6743 | 255.1391 |
| 17293635 | Hsd17b3  | hydroxysteroid (17-beta) dehydrogenase 3                                     | 5.042713 | 4.25571  | 4.053618 | 4.839339 | 5.006388 | 4.736922 |
| 17350517 | Hsd17b4  | hydroxysteroid (17-beta) dehydrogenase 4                                     | 995.8054 | 953.1504 | 946.888  | 954.8961 | 705.1176 | 805.5666 |
| 17246057 | Hsd17b6  | hydroxysteroid (17-beta) dehydrogenase 6                                     | 612.2385 | 826.6942 | 592.7172 | 548.326  | 396.5118 | 500.1684 |
| 17229466 | Hsd17b7  | hydroxysteroid (17-beta) dehydrogenase 7                                     | 70.6604  | 68.84786 | 90.66162 | 58.11546 | 63.81041 | 52.74235 |
| 17231229 | Hsd11b1  | hydroxysteroid 11-beta dehydrogenase 1                                       | 224.9624 | 217.5058 | 191.5716 | 191.1154 | 249.0307 | 278.0306 |
| 17504829 | Hsd11b2  | hydroxysteroid 11-beta dehydrogenase 2                                       | 7.464367 | 8.139725 | 7.795438 | 8.618997 | 7.922633 | 7.541283 |
| 17513446 | Hsd11    | hydroxysteroid dehydrogenase like 1                                          | 7.44401  | 6.288387 | 8.192763 | 6.488073 | 6.930455 | 7.643164 |
| 17414456 | Hsd12    | hydroxysteroid dehydrogenase like 2                                          | 291.9606 | 331.2278 | 307.4483 | 310.4786 | 217.7909 | 244.7508 |
| 17265912 | Hic1     | hypermethylated in cancer 1                                                  | 4.414255 | 5.815527 | 4.761876 | 5.110059 | 5.068118 | 5.607081 |
| 17323432 | Hic2     | hypermethylated in cancer 2                                                  | 5.530999 | 6.438212 | 8.550033 | 6.438212 | 8.023824 | 6.992896 |
| 17290093 | Hcn1     | hyperpolarization-activated, cyclic nucleotide-gated K+ 1                    | 3.696936 | 2.855216 | 2.422757 | 2.842637 | 3.040482 | 2.784349 |
| 17234936 | Hcn2     | hyperpolarization-activated, cyclic nucleotide-gated K+ 2                    | 7.368138 | 8.222403 | 6.235045 | 9.722788 | 8.312198 | 7.417176 |
| 17406925 | Hcn3     | hyperpolarization-activated, cyclic nucleotide-gated K+ 3                    | 5.71158  | 4.875804 | 5.374982 | 6.887594 | 4.98105  | 5.242773 |
| 17517924 | Hcn4     | hyperpolarization-activated, cyclic nucleotide-gated K+ 4                    | 4.329649 | 5.577351 | 3.648036 | 4.635163 | 4.327039 | 4.021462 |
| 17269672 | Hcrt     | hypocretin                                                                   | 7.594105 | 8.031559 | 6.992896 | 7.629243 | 5.985908 | 6.992896 |
| 17430561 | Hcrt1    | hypocretin (orexin) receptor 1                                               | 4.715694 | 4.645487 | 4.160019 | 4.418081 | 4.040349 | 4.617558 |
| 17528913 | Hcrt2    | hypocretin (orexin) receptor 2                                               | 5.923952 | 7.02384  | 6.659021 | 6.537097 | 5.481041 | 6.69062  |
| 17420500 | AB041806 | hypothetical protein, MNCb-2457                                              | 6.106222 | 5.527779 | 5.878956 | 6.275672 | 6.882964 | 6.466253 |
| 17534720 | Hprt     | hypoxanthine guanine phosphoribosyl transferase                              | 154.8835 | 157.9342 | 163.2546 | 158.873  | 152.5607 | 158.0153 |
| 17276328 | Hif1a    | hypoxia inducible factor 1, alpha subunit                                    | 48.91042 | 47.85474 | 48.48747 | 45.0336  | 40.48063 | 44.35208 |
| 17487001 | Hif3a    | hypoxia inducible factor 3, alpha subunit                                    | 7.047248 | 6.416026 | 7.814535 | 6.891032 | 5.999366 | 7.590158 |
| 17456554 | Hilpd    | hypoxia inducible lipid droplet associated                                   | 35.56731 | 35.83457 | 35.30596 | 36.09607 | 34.49033 | 39.82107 |
| 17516564 | Hyou1    | hypoxia up-regulated 1                                                       | 504.5628 | 197.1924 | 177.6274 | 215.9959 | 232.9231 | 170.159  |
| 17359716 | Hif1an   | hypoxia-inducible factor 1, alpha subunit inhibitor                          | 27.24463 | 24.84787 | 21.51394 | 23.25292 | 21.53155 | 28.42818 |
| 17417422 | Ipp      | IAP promoted placental gene                                                  | 13.68383 | 13.64973 | 15.07138 | 14.91777 | 15.07138 | 12.04581 |
| 17263345 | Iba57    | IBA57, iron-sulfur cluster assembly homolog (S. cerevisiae)                  | 5.25456  | 5.101141 | 4.305677 | 4.68523  | 5.429427 | 3.849551 |
| 17234786 | Icosl    | icos ligand                                                                  | 6.403186 | 7.405669 | 8.049226 | 7.357267 | 7.030757 | 8.1351   |

|          |            |                                                                                 |          |          |          |          |          |          |
|----------|------------|---------------------------------------------------------------------------------|----------|----------|----------|----------|----------|----------|
| 17287869 | Idnk       | idnK gluconokinase homolog (E. coli)                                            | 40.72492 | 49.94644 | 67.56527 | 47.40574 | 56.48164 | 59.72487 |
| 17542149 | Ids        | iduronate 2-sulfatase                                                           | 19.58626 | 18.78475 | 19.21019 | 18.89837 | 24.19438 | 16.38507 |
| 17440293 | Idua       | iduronidase, alpha-L-                                                           | 28.02204 | 26.97816 | 38.01877 | 25.53882 | 25.92424 | 20.1854  |
| 17349627 | Igip       | IgA inducing protein                                                            | 29.74427 | 24.10232 | 24.05925 | 28.35537 | 28.08874 | 25.52608 |
| 17474338 | Igfl3      | IGF-like family member 3                                                        | 3.562747 | 3.339703 | 3.077012 | 3.339703 | 3.363492 | 3.339703 |
| 17476478 | Igflr1     | IGF-like family receptor 1                                                      | 10.16607 | 9.732834 | 11.49002 | 10.01958 | 8.497686 | 10.09116 |
| 17490126 | Iglon5     | IgLON family member 5                                                           | 9.721911 | 10.96353 | 10.55372 | 13.23806 | 10.99    | 9.128261 |
| 17349745 | Ilk        | IK cytokine                                                                     | 170.6575 | 157.9988 | 146.732  | 142.6613 | 181.7448 | 164.0589 |
| 17247336 | Ikzf1      | IKAROS family zinc finger 1                                                     | 9.123011 | 7.605853 | 6.992896 | 6.697023 | 6.589687 | 8.420524 |
| 17223985 | Ikzf2      | IKAROS family zinc finger 2                                                     | 4.514856 | 4.775958 | 5.175937 | 5.175937 | 5.357946 | 5.643186 |
| 17268820 | Ikzf3      | IKAROS family zinc finger 3                                                     | 6.016982 | 5.86215  | 6.702224 | 5.86215  | 6.193865 | 5.606421 |
| 17246268 | Ikzf4      | IKAROS family zinc finger 4                                                     | 4.735675 | 6.535466 | 4.823098 | 6.914812 | 6.125935 | 6.125935 |
| 17497044 | Ikzf5      | IKAROS family zinc finger 5                                                     | 37.46055 | 37.47171 | 36.37587 | 35.52075 | 39.67917 | 38.14547 |
| 17236476 | Ikbip      | IKKBK interacting protein                                                       | 12.291   | 12.46923 | 12.78677 | 15.80753 | 13.87023 | 13.20589 |
| 17262102 | Itk        | IL2 inducible T cell kinase                                                     | 5.146494 | 4.20927  | 4.239047 | 4.20927  | 4.160797 | 4.20927  |
| 17234814 | Ilvbl      | ilvB (bacterial acetolactate synthase)-like                                     | 27.09454 | 29.09945 | 29.31709 | 23.27179 | 26.88911 | 27.13156 |
| 17258186 | Ict1       | immature colon carcinoma transcript 1                                           | 68.67866 | 58.11183 | 57.01027 | 55.6153  | 58.13157 | 64.50459 |
| 17271888 | Ict1os     | immature colon carcinoma transcript 1, opposite strand [Source:MGI Symbol;Acc:G | 3.703322 | 4.224469 | 3.703322 | 3.703322 | 4.504853 | 3.915645 |
| 17511130 | Ier2       | immediate early response 2                                                      | 16.27708 | 18.24324 | 22.69307 | 19.85073 | 24.35507 | 26.59476 |
| 17337228 | Ier3       | immediate early response 3                                                      | 11.24366 | 17.20076 | 21.66358 | 9.739718 | 14.36305 | 10.78863 |
| 17351913 | Ier3ip1    | immediate early response 3 interacting protein 1                                | 47.39063 | 38.43157 | 40.03112 | 39.50984 | 40.13642 | 37.43615 |
| 17228349 | Ier5       | immediate early response 5                                                      | 16.55219 | 16.07537 | 12.56518 | 15.02684 | 15.43967 | 13.78407 |
| 17383663 | Ier5l      | immediate early response 5-like                                                 | 20.07224 | 19.3154  | 22.84711 | 20.60054 | 24.3392  | 20.34652 |
| 17262202 | Irgm1      | immunity-related GTPase family M member 1                                       | 44.10805 | 25.28062 | 25.20311 | 34.29437 | 26.86135 | 29.96113 |
| 17249990 | Irgm2      | immunity-related GTPase family M member 2                                       | 70.48967 | 80.42265 | 111.1412 | 120.5945 | 89.66481 | 98.4364  |
| 17487716 | Irgc1      | immunity-related GTPase family, cinema 1                                        | 5.558055 | 5.742226 | 5.772155 | 4.815448 | 4.970118 | 5.358466 |
| 17475001 | Irgq       | immunity-related GTPase family, Q                                               | 21.38652 | 19.92627 | 17.37077 | 17.62071 | 22.103   | 17.99058 |
| 17536519 | Igbp1      | immunoglobulin (CD79A) binding protein 1                                        | 88.51745 | 107.1761 | 95.19936 | 100.6107 | 116.5641 | 116.2897 |
| 17472303 | Igbp1b     | immunoglobulin (CD79A) binding protein 1b                                       | 3.37206  | 3.263862 | 3.339703 | 4.024222 | 3.339703 | 3.729055 |
| 17284334 | Ighg       | Immunoglobulin heavy chain (gamma polypeptide)                                  | 7.532141 | 40.42792 | 19.06785 | 7.698994 | 9.949334 | 5.954498 |
| 17284484 | Ighg       | Immunoglobulin heavy chain (gamma polypeptide)                                  | 2.44606  | 1.761116 | 2.142864 | 2.606909 | 2.643959 | 1.920564 |
| 17284314 | Igh-VJ558  | immunoglobulin heavy chain (J558 family)                                        | 6.970683 | 10.54794 | 8.174157 | 6.43906  | 8.031893 | 7.681936 |
| 17284321 | Igh-VJ558  | immunoglobulin heavy chain (J558 family)                                        | 3.539584 | 2.603243 | 2.428356 | 2.948048 | 3.263862 | 2.800996 |
| 17284379 | Igh-VJ558  | immunoglobulin heavy chain (J558 family)                                        | 3.916568 | 4.390697 | 3.438168 | 3.599958 | 3.4082   | 3.287908 |
| 17284450 | Igh-VJ558  | immunoglobulin heavy chain (J558 family)                                        | 3.09365  | 2.416686 | 3.004823 | 3.824842 | 2.110142 | 3.054995 |
| 17284493 | Igh-VJ558  | immunoglobulin heavy chain (J558 family)                                        | 2.649922 | 2.017432 | 2.23994  | 1.896409 | 2.877369 | 2.061965 |
| 17284536 | Igh-VJ558  | immunoglobulin heavy chain (J558 family)                                        | 3.069067 | 2.893128 | 2.669149 | 2.603171 | 2.893128 | 2.692712 |
| 17284447 | Igh-V11    | immunoglobulin heavy chain (V11 family)                                         | 106.721  | 92.5942  | 91.56092 | 101.9996 | 82.35704 | 85.44002 |
| 17284339 | Igh-V3609N | immunoglobulin heavy chain (V3609N non-productive)                              | 7.551745 | 158.0876 | 76.5521  | 6.631706 | 5.714471 | 6.105841 |
| 17284356 | Igh-V7183  | immunoglobulin heavy chain (V7183 family)                                       | 43.36112 | 75.7057  | 52.84848 | 41.28054 | 51.03058 | 37.41513 |
| 17284399 | Igh-V7183  | immunoglobulin heavy chain (V7183 family)                                       | 4.228864 | 3.0726   | 2.544199 | 3.932182 | 4.111225 | 3.547493 |
| 17284354 | Igh-VX24   | immunoglobulin heavy chain (X24 family)                                         | 15.60266 | 70.72459 | 55.94937 | 23.98615 | 21.1615  | 17.28849 |
| 17284376 | Igh-VX24   | immunoglobulin heavy chain (X24 family)                                         | 91.8616  | 96.7688  | 82.57425 | 80.03006 | 73.36093 | 96.83589 |
| 17284408 | Igh-VX24   | immunoglobulin heavy chain (X24 family)                                         | 63.35515 | 70.81485 | 68.70628 | 74.06448 | 60.11112 | 70.94111 |
| 17284327 | Ighg2c     | immunoglobulin heavy constant gamma 2C                                          | 20.26376 | 21.92447 | 16.59653 | 19.63873 | 17.78304 | 17.96168 |
| 17284344 | Ighg3      | Immunoglobulin heavy constant gamma 3                                           | 2.975207 | 4.43594  | 3.694144 | 2.606909 | 2.909114 | 4.128449 |
| 17284349 | Ighm       | immunoglobulin heavy constant mu                                                | 20.18805 | 23.97153 | 29.18206 | 21.81956 | 23.18516 | 14.06619 |
| 17284360 | Ighm       | immunoglobulin heavy constant mu                                                | 108.0676 | 183.0787 | 104.8127 | 126.9705 | 111.9942 | 132.6472 |
| 17284373 | Ighm       | immunoglobulin heavy constant mu                                                | 5.633182 | 4.037969 | 5.320346 | 4.411258 | 3.204457 | 5.972107 |
| 17284402 | Ighm       | immunoglobulin heavy constant mu                                                | 5.227894 | 6.177101 | 4.513323 | 6.293489 | 4.199624 | 10.15684 |
| 17284660 | Ighm       | immunoglobulin heavy constant mu                                                | 2.462357 | 13.06568 | 6.998181 | 2.351645 | 4.912509 | 2.897242 |
| 17284358 | Ighj2      | immunoglobulin heavy joining 2 [Source:MGI Symbol;Acc:MGI:4439803]              | 3.572837 | 3.200284 | 2.730017 | 3.322456 | 3.793133 | 3.533236 |
| 17284498 | Ighv10-1   | immunoglobulin heavy variable 10-1                                              | 2.285247 | 2.850984 | 3.51767  | 2.608192 | 2.458673 | 2.318578 |
| 17284439 | Ighv11-1   | immunoglobulin heavy variable 11-1                                              | 25.29657 | 21.22452 | 20.73161 | 30.2007  | 21.31785 | 22.20127 |
| 17284517 | Ighv1-14   | immunoglobulin heavy variable 1-14                                              | 2.096089 | 1.898013 | 1.915671 | 3.692275 | 2.228789 | 2.285991 |
| 17284519 | Ighv1-15   | immunoglobulin heavy variable 1-15                                              | 7.102023 | 7.698994 | 8.151017 | 6.957746 | 6.030928 | 7.019654 |
| 17284496 | Ighv1-2    | immunoglobulin heavy variable 1-2                                               | 2.086681 | 1.927285 | 1.855155 | 1.928635 | 2.121023 | 1.918249 |
| 17284544 | Ighv1-30   | immunoglobulin heavy variable 1-30                                              | 1.825232 | 1.558859 | 2.447807 | 1.797099 | 1.941457 | 2.048915 |
| 17284480 | Ighv13-1   | immunoglobulin heavy variable 13-1                                              | 2.953407 | 2.749273 | 2.156976 | 2.606909 | 3.326719 | 3.429718 |
| 17284546 | Ighv1-31   | immunoglobulin heavy variable 1-31                                              | 1.905342 | 2.009449 | 2.019209 | 2.304206 | 2.120126 | 2.256615 |
| 17284548 | Ighv1-34   | immunoglobulin heavy variable 1-34                                              | 3.292903 | 15.12004 | 16.33936 | 4.890832 | 4.961409 | 5.916894 |
| 17284551 | Ighv1-36   | immunoglobulin heavy variable 1-36                                              | 6.392765 | 5.098384 | 7.330848 | 7.076127 | 6.109905 | 6.13337  |
| 17284554 | Ighv1-37   | immunoglobulin heavy variable 1-37                                              | 8.693156 | 16.17002 | 9.158238 | 8.381567 | 8.476978 | 10.81724 |
| 17284557 | Ighv1-39   | immunoglobulin heavy variable 1-39                                              | 1.982801 | 2.265579 | 1.799679 | 1.979684 | 2.304446 | 2.283648 |
| 17284500 | Ighv1-4    | immunoglobulin heavy variable 1-4                                               | 3.383157 | 5.068188 | 4.065774 | 3.947393 | 5.101    | 3.139054 |
| 17284432 | Ighv14-1   | immunoglobulin heavy variable 14-1                                              | 5.950538 | 10.54794 | 6.533699 | 5.519739 | 8.472748 | 9.76527  |
| 17284442 | Ighv14-2   | immunoglobulin heavy variable 14-2                                              | 6.876479 | 8.78322  | 5.650075 | 4.767424 | 4.687504 | 4.557144 |
| 17284466 | Ighv14-4   | immunoglobulin heavy variable 14-4                                              | 3.871654 | 30.25329 | 17.84849 | 4.920654 | 6.230638 | 6.082692 |
| 17284564 | Ighv1-47   | immunoglobulin heavy variable 1-47                                              | 2.285279 | 2.406006 | 2.264527 | 2.089228 | 2.26759  | 2.688889 |
| 17284566 | Ighv1-49   | immunoglobulin heavy variable 1-49                                              | 1.756897 | 1.824676 | 2.423144 | 2.452155 | 1.927779 | 2.120273 |
| 17284571 | Ighv1-50   | immunoglobulin heavy variable 1-50                                              | 2.435588 | 2.569255 | 2.308555 | 2.445467 | 2.393646 | 2.242006 |
| 17284574 | Ighv1-52   | immunoglobulin heavy variable 1-52                                              | 2.772197 | 7.698994 | 5.120306 | 3.263862 | 3.729055 | 3.478439 |
| 17284577 | Ighv1-53   | immunoglobulin heavy variable 1-53                                              | 13.32801 | 16.36033 | 10.66876 | 13.63942 | 14.00335 | 11.93114 |
| 17284585 | Ighv1-55   | immunoglobulin heavy variable 1-55                                              | 2.16556  | 2.437952 | 1.898026 | 2.362722 | 2.07471  | 1.907298 |
| 17284591 | Ighv1-56   | immunoglobulin heavy variable 1-56                                              | 10.16607 | 23.31894 | 11.53287 | 9.604696 | 10.48228 | 9.250427 |
| 17284596 | Ighv1-58   | immunoglobulin heavy variable 1-58                                              | 2.414258 | 2.140266 | 1.993827 | 1.940475 | 2.517584 | 2.041076 |
| 17284453 | Ighv16-1   | immunoglobulin heavy variable 16-1                                              | 4.829487 | 4.847262 | 5.063658 | 3.626782 | 4.829487 | 4.468188 |
| 17284602 | Ighv1-61   | immunoglobulin heavy variable 1-61                                              | 2.74792  | 3.406476 | 2.973269 | 2.162185 | 2.895716 | 2.093853 |
| 17284605 | Ighv1-62-1 | immunoglobulin heavy variable 1-62-1                                            | 12.51928 | 35.71653 | 20.01306 | 11.28622 | 12.04314 | 9.418061 |
| 17284607 | Ighv1-62-2 | immunoglobulin heavy variable 1-62-2                                            | 7.033389 | 12.46231 | 11.42459 | 8.48362  | 10.07935 | 8.244089 |
| 17284609 | Ighv1-62-3 | immunoglobulin heavy variable 1-62-3                                            | 11.03489 | 10.96854 | 5.87305  | 7.595263 | 4.92666  | 4.005133 |
| 17284623 | Ighv1-66   | immunoglobulin heavy variable 1-66                                              | 3.763774 | 4.125789 | 4.103002 | 3.552833 | 3.620829 | 3.75619  |
| 17284628 | Ighv1-69   | immunoglobulin heavy variable 1-69                                              | 2.412468 | 4.105079 | 2.412468 | 2.668224 | 2.149096 | 2.470375 |
| 17284631 | Ighv1-71   | immunoglobulin heavy variable 1-71                                              | 7.033389 | 12.46231 | 11.42459 | 8.48362  | 10.07935 | 8.244089 |

|          |             |                                                                         |          |          |          |          |          |          |
|----------|-------------|-------------------------------------------------------------------------|----------|----------|----------|----------|----------|----------|
| 17284633 | Ighv1-72    | immunoglobulin heavy variable 1-72                                      | 10.62742 | 23.59697 | 15.39159 | 13.20278 | 11.76721 | 12.11607 |
| 17284638 | Ighv1-73    | immunoglobulin heavy variable 1-73                                      | 2.027891 | 2.422925 | 3.635213 | 2.508109 | 2.65798  | 2.143205 |
| 17284645 | Ighv1-75    | immunoglobulin heavy variable 1-75                                      | 19.34931 | 45.32013 | 39.80755 | 15.1919  | 31.74374 | 19.85376 |
| 17284648 | Ighv1-76    | immunoglobulin heavy variable 1-76                                      | 4.884836 | 9.563045 | 5.269478 | 3.218124 | 4.085917 | 4.723414 |
| 17284650 | Ighv1-77    | immunoglobulin heavy variable 1-77                                      | 3.792266 | 6.44835  | 5.475915 | 3.278487 | 6.091426 | 6.119611 |
| 17284652 | Ighv1-78    | immunoglobulin heavy variable 1-78                                      | 1.779979 | 2.721006 | 2.769605 | 2.465688 | 2.298082 | 2.32099  |
| 17284654 | Ighv1-80    | immunoglobulin heavy variable 1-80                                      | 2.438645 | 6.373651 | 3.163913 | 3.460403 | 3.826035 | 3.460403 |
| 17284657 | Ighv1-81    | immunoglobulin heavy variable 1-81                                      | 2.402872 | 3.259589 | 2.595603 | 2.400675 | 2.455471 | 2.077718 |
| 17284662 | Ighv1-83    | immunoglobulin heavy variable 1-83                                      | 4.569987 | 3.924802 | 3.791451 | 2.921744 | 2.497544 | 3.278941 |
| 17284664 | Ighv1-84    | immunoglobulin heavy variable 1-84                                      | 3.049219 | 4.089629 | 4.64552  | 4.806944 | 3.308621 | 3.265106 |
| 17284667 | Ighv1-85    | immunoglobulin heavy variable 1-85                                      | 2.590373 | 4.024557 | 2.043454 | 2.103847 | 2.996005 | 2.02201  |
| 17284370 | Ighv2-1     | immunoglobulin heavy variable 2-1                                       | 6.171709 | 6.895332 | 4.729999 | 6.171709 | 6.171709 | 5.682832 |
| 17284382 | Ighv2-3     | immunoglobulin heavy variable 2-3                                       | 4.890154 | 4.950623 | 3.832803 | 4.787094 | 3.967802 | 4.270752 |
| 17284396 | Ighv2-5     | immunoglobulin heavy variable 2-5                                       | 5.506746 | 6.006606 | 6.577275 | 6.827181 | 6.145924 | 5.787499 |
| 17284411 | Ighv2-6-8   | immunoglobulin heavy variable 2-6-8                                     | 10.27666 | 8.935757 | 12.07968 | 10.33316 | 11.81985 | 10.31263 |
| 17284414 | Ighv2-7     | immunoglobulin heavy variable 2-7                                       | 11.71293 | 5.780603 | 7.219605 | 6.730809 | 8.022768 | 9.94437  |
| 17284426 | Ighv2-9     | immunoglobulin heavy variable 2-9                                       | 13.62949 | 24.84545 | 20.34751 | 13.14726 | 13.41756 | 25.52219 |
| 17284437 | Ighv3-1     | immunoglobulin heavy variable 3-1                                       | 2.597907 | 5.263856 | 5.961106 | 3.416431 | 6.494147 | 3.229185 |
| 17284445 | Ighv3-2     | immunoglobulin heavy variable 3-2                                       | 8.250891 | 6.720879 | 9.052084 | 9.703936 | 10.39862 | 11.32304 |
| 17284435 | Ighv4-1     | immunoglobulin heavy variable 4-1                                       | 1.933963 | 2.019965 | 2.258868 | 2.098255 | 2.332295 | 2.204635 |
| 17284417 | Ighv5-15    | immunoglobulin heavy variable 5-15                                      | 2.690921 | 1.809223 | 2.800588 | 2.337992 | 2.603135 | 2.089865 |
| 17284420 | Ighv5-16    | immunoglobulin heavy variable 5-16                                      | 4.551115 | 6.775277 | 3.48725  | 3.579629 | 4.660711 | 2.454399 |
| 17284423 | Ighv5-17    | immunoglobulin heavy variable 5-17                                      | 3.044109 | 2.797581 | 2.481049 | 2.805796 | 3.191512 | 2.447078 |
| 17284387 | Ighv5-6     | immunoglobulin heavy variable 5-6                                       | 5.879201 | 5.233514 | 3.823145 | 5.246117 | 3.986493 | 5.229054 |
| 17284393 | Ighv5-9     | immunoglobulin heavy variable 5-9                                       | 3.030215 | 5.020427 | 3.801266 | 4.20927  | 3.944767 | 4.696513 |
| 17284405 | Ighv5-9-1   | immunoglobulin heavy variable 5-9-1                                     | 3.527779 | 5.535524 | 3.883991 | 3.076116 | 3.883991 | 3.883991 |
| 17284490 | Ighv6-3     | immunoglobulin heavy variable 6-3                                       | 38.06967 | 43.59921 | 40.45259 | 29.69854 | 33.29445 | 32.5887  |
| 17284429 | Ighv7-2     | immunoglobulin heavy variable 7-2                                       | 1.82741  | 1.935049 | 1.922602 | 1.843158 | 1.969665 | 1.782819 |
| 17284463 | Ighv7-3     | immunoglobulin heavy variable 7-3                                       | 2.058566 | 2.561893 | 3.114887 | 2.07841  | 2.367788 | 1.953715 |
| 17284471 | Ighv7-4     | immunoglobulin heavy variable 7-4                                       | 1.906016 | 2.06421  | 2.899853 | 2.736591 | 2.150124 | 2.422069 |
| 17284636 | Ighv8-13    | immunoglobulin heavy variable 8-13                                      | 3.138032 | 3.574373 | 3.516816 | 2.256927 | 2.915877 | 2.946761 |
| 17284643 | Ighv8-14    | immunoglobulin heavy variable 8-14                                      | 4.49319  | 4.801649 | 4.471751 | 6.421187 | 4.235611 | 6.041597 |
| 17284593 | Ighv8-8     | immunoglobulin heavy variable 8-8                                       | 4.01461  | 18.35435 | 5.391363 | 3.436286 | 4.283173 | 3.168698 |
| 17284455 | Ighv9-1     | immunoglobulin heavy variable 9-1                                       | 5.338965 | 6.992896 | 6.232409 | 8.12079  | 5.840776 | 4.693617 |
| 17284482 | Ighv9-4     | immunoglobulin heavy variable 9-4                                       | 17.58545 | 24.65315 | 23.51615 | 15.34323 | 24.11936 | 21.78933 |
| 17284505 | Ighv10-3    | immunoglobulin heavy variable V10-3                                     | 3.023187 | 2.953407 | 2.670833 | 3.50142  | 1.969665 | 3.596017 |
| 17284515 | Ighv1-12    | immunoglobulin heavy variable V1-12                                     | 11.63355 | 13.04939 | 10.15283 | 8.51685  | 7.603955 | 13.81899 |
| 17279548 | Ighv1-13    | immunoglobulin heavy variable V1-13 [Source:MGI Symbol;Acc:MGI:5009907] | 2.923811 | 3.009972 | 2.749006 | 2.953386 | 3.729055 | 2.285976 |
| 17284522 | Ighv1-17-1  | immunoglobulin heavy variable V1-17-1                                   | 2.341609 | 2.089272 | 2.130349 | 1.940475 | 2.14377  | 2.093301 |
| 17284527 | Ighv1-18    | immunoglobulin heavy variable V1-18                                     | 2.406006 | 2.406006 | 2.757422 | 2.304206 | 3.688822 | 2.393049 |
| 17284530 | Ighv1-19    | immunoglobulin heavy variable V1-19                                     | 2.444569 | 7.851945 | 3.687543 | 2.874518 | 2.846068 | 3.32929  |
| 17284533 | Ighv1-20    | immunoglobulin heavy variable V1-20                                     | 2.998332 | 5.806505 | 4.894257 | 5.041454 | 4.352276 | 5.313712 |
| 17284487 | Ighv12-3    | immunoglobulin heavy variable V12-3                                     | 3.860132 | 3.351275 | 5.523336 | 4.20927  | 4.20927  | 5.003716 |
| 17284539 | Ighv1-23    | immunoglobulin heavy variable V1-23                                     | 20.91346 | 19.33027 | 17.21972 | 17.13839 | 12.75013 | 19.67293 |
| 17284542 | Ighv1-24    | immunoglobulin heavy variable V1-24                                     | 1.836412 | 1.898013 | 1.919632 | 2.084455 | 1.977256 | 1.985277 |
| 17284560 | Ighv1-42    | immunoglobulin heavy variable V1-42                                     | 3.339703 | 8.167248 | 4.617558 | 3.417663 | 3.39703  | 2.635451 |
| 17284562 | Ighv1-43    | immunoglobulin heavy variable V1-43                                     | 3.537769 | 5.886418 | 4.233615 | 4.113681 | 4.352065 | 4.20927  |
| 17284503 | Ighv1-5     | immunoglobulin heavy variable V1-5                                      | 6.171709 | 6.122666 | 8.183738 | 7.754319 | 7.022477 | 7.754319 |
| 17284509 | Ighv15-2    | immunoglobulin heavy variable V15-2                                     | 2.549687 | 2.953407 | 3.083032 | 2.953407 | 3.623113 | 3.053513 |
| 17284582 | Ighv1-54    | immunoglobulin heavy variable V1-54                                     | 2.049369 | 2.145732 | 2.017865 | 1.945242 | 2.247156 | 1.780275 |
| 17284599 | Ighv1-59    | immunoglobulin heavy variable V1-59                                     | 2.395871 | 5.361401 | 2.911797 | 3.409121 | 2.193782 | 4.957456 |
| 17284617 | Ighv1-62    | immunoglobulin heavy variable V1-62                                     | 1.83162  | 3.433548 | 2.837027 | 1.795954 | 2.409911 | 2.070673 |
| 17284614 | Ighv1-63    | immunoglobulin heavy variable V1-63                                     | 10.05618 | 12.47614 | 8.805653 | 12.53213 | 10.92196 | 8.324421 |
| 17284626 | Ighv1-67    | immunoglobulin heavy variable V1-67                                     | 2.039888 | 5.775997 | 3.25584  | 2.923243 | 3.449889 | 3.622084 |
| 17284507 | Ighv1-7     | immunoglobulin heavy variable V1-7                                      | 3.962058 | 8.094377 | 3.817611 | 4.006271 | 4.20927  | 3.797316 |
| 17284640 | Ighv1-74    | immunoglobulin heavy variable V1-74                                     | 2.162035 | 2.356703 | 1.734428 | 1.961803 | 2.504148 | 1.930561 |
| 17284512 | Ighv1-9     | immunoglobulin heavy variable V1-9                                      | 6.692151 | 9.127059 | 8.467112 | 5.84029  | 3.241384 | 8.214712 |
| 17284390 | Ighv2-4     | immunoglobulin heavy variable V2-4                                      | 138.3722 | 168.0422 | 149.9274 | 138.0407 | 150.1062 | 161.6612 |
| 17284469 | Ighv3-3     | immunoglobulin heavy variable V3-3                                      | 2.066716 | 2.400292 | 2.329193 | 2.874657 | 3.104326 | 1.996925 |
| 17284474 | Ighv3-4     | immunoglobulin heavy variable V3-4                                      | 4.712557 | 3.458772 | 3.641013 | 3.203391 | 4.073051 | 3.622862 |
| 17279546 | Ighv5-8     | immunoglobulin heavy variable V5-8 [Source:MGI Symbol;Acc:MGI:5009890]  | 3.13962  | 3.66197  | 3.294935 | 3.937036 | 3.294935 | 3.339703 |
| 17284620 | Ighv8-11    | immunoglobulin heavy variable V8-11                                     | 2.253504 | 2.158995 | 2.335692 | 2.102652 | 2.149275 | 2.081841 |
| 17284568 | Ighv8-5     | immunoglobulin heavy variable V8-5                                      | 2.809941 | 2.003566 | 2.385431 | 2.279251 | 2.233428 | 2.751923 |
| 17284580 | Ighv8-6     | immunoglobulin heavy variable V8-6                                      | 6.992896 | 7.675603 | 7.334456 | 8.482385 | 4.773045 | 4.717524 |
| 17284612 | Ighv8-9     | immunoglobulin heavy variable V8-9                                      | 2.813469 | 2.889916 | 3.511117 | 4.39694  | 4.785567 | 3.861764 |
| 17284457 | Ighv9-2     | immunoglobulin heavy variable V9-2                                      | 3.196781 | 6.902409 | 3.122994 | 4.179818 | 3.271359 | 4.20927  |
| 17284460 | Ighv9-3     | immunoglobulin heavy variable V9-3                                      | 3.022747 | 8.334698 | 2.717669 | 3.363492 | 2.890983 | 4.597055 |
| 17449447 | Jchain      | immunoglobulin joining chain                                            | 3.919963 | 9.30825  | 4.930521 | 3.184419 | 3.942033 | 3.42397  |
| 17459338 | Igk-V1      | immunoglobulin kappa chain variable 1 (V1)                              | 4.681043 | 13.19372 | 11.51626 | 4.482986 | 3.375006 | 3.144019 |
| 17459315 | Igkv1-122   | immunoglobulin kappa chain variable 1-122                               | 4.061155 | 3.136531 | 2.347719 | 2.606909 | 2.098211 | 3.057813 |
| 17467499 | Igkv12-38   | immunoglobulin kappa chain variable 12-38                               | 2.105773 | 2.175324 | 2.385679 | 2.030043 | 2.612516 | 1.992487 |
| 17467492 | Igkv12-41   | immunoglobulin kappa chain variable 12-41                               | 2.721968 | 2.511989 | 1.706145 | 2.086247 | 2.713284 | 2.319012 |
| 17467404 | Igkv12-89   | immunoglobulin kappa chain variable 12-89                               | 3.462322 | 2.953407 | 2.986364 | 2.571571 | 2.959431 | 2.770008 |
| 17459370 | Igkv13-54-1 | immunoglobulin kappa chain variable 13-54-1                             | 2.060051 | 2.060051 | 2.060051 | 1.783795 | 1.673212 | 2.098124 |
| 17459365 | Igkv13-84   | immunoglobulin kappa chain variable 13-84                               | 3.778202 | 3.561636 | 2.707404 | 2.817391 | 3.288022 | 4.390058 |
| 17459350 | Igkv14-100  | immunoglobulin kappa chain variable 14-100                              | 2.481049 | 1.898013 | 2.481049 | 2.481049 | 4.901794 | 2.481049 |
| 17459347 | Igkv15-103  | immunoglobulin kappa chain variable 15-103                              | 9.244338 | 31.89437 | 11.40828 | 9.275403 | 4.916767 | 8.428641 |
| 17467365 | Igkv17-134  | immunoglobulin kappa chain variable 17-134                              | 2.381119 | 2.031915 | 2.237007 | 2.600682 | 2.476393 | 2.11364  |
| 17467505 | Igkv18-36   | immunoglobulin kappa chain variable 18-36                               | 3.140665 | 3.353692 | 3.274399 | 2.955557 | 4.954571 | 3.216028 |
| 17467407 | Igkv1-88    | immunoglobulin kappa chain variable 1-88                                | 5.548201 | 5.780603 | 5.817221 | 5.155027 | 3.935181 | 3.806355 |
| 17467392 | Igkv19-93   | immunoglobulin kappa chain variable 19-93                               | 5.106731 | 14.81986 | 11.56746 | 8.372161 | 9.651813 | 9.186275 |
| 17459421 | Igk-V21     | immunoglobulin kappa chain variable 21 (V21)                            | 61.2607  | 191.8015 | 117.4636 | 67.78011 | 57.17767 | 54.96228 |
| 17459288 | Igkv2-137   | immunoglobulin kappa chain variable 2-137                               | 135.6852 | 152.0213 | 154.5972 | 137.628  | 125.7313 | 137.628  |
| 17459400 | Igkv3-5     | immunoglobulin kappa chain variable 3-5                                 | 2.88906  | 6.339548 | 5.075219 | 4.332321 | 4.216044 | 5.208327 |

|          |            |                                           |          |          |          |          |          |          |
|----------|------------|-------------------------------------------|----------|----------|----------|----------|----------|----------|
| 17467464 | Igkv4-56   | immunoglobulin kappa chain variable 4-56  | 4.071132 | 4.024445 | 3.738683 | 4.436678 | 4.680426 | 4.084162 |
| 17467451 | Igkv4-61   | immunoglobulin kappa chain variable 4-61  | 3.443009 | 5.308632 | 4.634038 | 4.622041 | 3.410303 | 4.187154 |
| 17467435 | Igkv4-70   | immunoglobulin kappa chain variable 4-70  | 2.271885 | 6.999442 | 3.084101 | 2.770929 | 3.097684 | 2.306635 |
| 17467433 | Igkv4-71   | immunoglobulin kappa chain variable 4-71  | 2.489593 | 2.151362 | 1.961286 | 1.874609 | 2.035326 | 1.936793 |
| 17467430 | Igkv4-72   | immunoglobulin kappa chain variable 4-72  | 3.018852 | 16.969   | 5.702759 | 3.492863 | 3.225427 | 3.578785 |
| 17467401 | Igkv4-90   | immunoglobulin kappa chain variable 4-90  | 3.589518 | 3.37234  | 6.347551 | 3.156794 | 2.997064 | 4.339473 |
| 17467398 | Igkv4-91   | immunoglobulin kappa chain variable 4-91  | 5.153205 | 9.411013 | 8.18198  | 6.382404 | 4.836489 | 7.490749 |
| 17467489 | Igkv5-43   | immunoglobulin kappa chain variable 5-43  | 2.103599 | 4.023971 | 2.837027 | 2.372256 | 3.488701 | 2.52071  |
| 17467483 | Igkv5-45   | immunoglobulin kappa chain variable 5-45  | 3.150891 | 2.126145 | 2.304206 | 2.455727 | 1.56516  | 2.606909 |
| 17459377 | Igkv6-25   | immunoglobulin kappa chain variable 6-25  | 3.470564 | 4.041918 | 4.20927  | 3.263862 | 2.782767 | 3.342714 |
| 17467522 | Igkv6-29   | immunoglobulin kappa chain variable 6-29  | 5.213853 | 7.308625 | 3.850912 | 4.585662 | 3.982957 | 3.268684 |
| 17467513 | Igkv7-33   | immunoglobulin kappa chain variable 7-33  | 3.76701  | 2.749578 | 3.045861 | 3.200395 | 4.960275 | 3.729055 |
| 17467531 | Igkv8-24   | immunoglobulin kappa chain variable 8-24  | 3.38616  | 3.424492 | 2.308475 | 2.657611 | 2.912766 | 2.281448 |
| 17467529 | Igkv8-27   | immunoglobulin kappa chain variable 8-27  | 3.861684 | 2.281686 | 1.748369 | 2.387813 | 2.626224 | 2.490128 |
| 17467519 | Igkv8-30   | immunoglobulin kappa chain variable 8-30  | 6.878386 | 4.359129 | 6.190174 | 3.536862 | 4.399318 | 3.255209 |
| 17459321 | Igkv9-120  | immunoglobulin kappa chain variable 9-120 | 2.541147 | 2.762913 | 2.753716 | 3.267529 | 2.442977 | 2.576228 |
| 17467377 | Igkv9-124  | immunoglobulin kappa chain variable 9-124 | 2.376931 | 2.562976 | 3.251037 | 2.771967 | 2.517078 | 3.192773 |
| 17459415 | Igkj1      | immunoglobulin kappa joining 1            | 99.04347 | 245.5461 | 158.4474 | 106.2486 | 118.0398 | 102.7867 |
| 17459417 | Igkj3      | immunoglobulin kappa joining 3            | 8.150508 | 10.81431 | 8.686289 | 9.294389 | 10.48685 | 15.51218 |
| 17467389 | Igkv10-94  | immunoglobulin kappa variable 10-94       | 4.464999 | 8.925976 | 6.263808 | 3.990225 | 6.030928 | 3.727323 |
| 17459361 | Igkv10-95  | immunoglobulin kappa variable 10-95       | 5.141966 | 5.454738 | 5.245026 | 4.939996 | 3.935481 | 4.141921 |
| 17467384 | Igkv10-96  | immunoglobulin kappa variable 10-96       | 2.410212 | 11.32053 | 10.43429 | 4.572236 | 8.93743  | 2.692059 |
| 17459312 | Igkv11-125 | immunoglobulin kappa variable 11-125      | 10.75816 | 8.072245 | 6.879911 | 10.37285 | 8.51685  | 9.303606 |
| 17459330 | Igkv1-115  | immunoglobulin kappa variable 1-115       | 2.338883 | 2.250881 | 1.895541 | 2.27933  | 3.050932 | 2.223188 |
| 17459324 | Igkv1-117  | immunoglobulin kappa variable 1-117       | 2.452223 | 22.46598 | 2.915877 | 1.960729 | 2.985784 | 3.25584  |
| 17467368 | Igkv1-131  | immunoglobulin kappa variable 1-131       | 3.551184 | 2.317083 | 2.453685 | 2.725536 | 2.810954 | 2.698766 |
| 17459297 | Igkv1-132  | immunoglobulin kappa variable 1-132       | 5.510679 | 2.231479 | 2.57637  | 2.243529 | 2.045452 | 1.963476 |
| 17459294 | Igkv1-133  | immunoglobulin kappa variable 1-133       | 4.061605 | 2.602125 | 2.934694 | 2.526009 | 3.62344  | 2.718197 |
| 17459291 | Igkv1-135  | immunoglobulin kappa variable 1-135       | 4.82156  | 11.82961 | 8.81628  | 5.94217  | 3.965025 | 3.408531 |
| 17467486 | Igkv12-44  | immunoglobulin kappa variable 12-44       | 4.333732 | 6.536915 | 4.448534 | 9.009581 | 6.780727 | 4.20927  |
| 17467480 | Igkv12-46  | immunoglobulin kappa variable 12-46       | 3.376293 | 8.680511 | 4.315417 | 3.729055 | 3.353017 | 3.584247 |
| 17467477 | Igkv12-47  | immunoglobulin kappa variable 12-47       | 9.919999 | 10.41665 | 10.41665 | 15.56054 | 10.06273 | 11.37228 |
| 17459358 | Igkv12-98  | immunoglobulin kappa variable 12-98       | 19.23524 | 24.57007 | 22.0837  | 14.61563 | 26.05539 | 23.08702 |
| 17467508 | Igkv1-35   | immunoglobulin kappa variable 1-35        | 1.942857 | 1.820103 | 2.049014 | 1.746855 | 2.857176 | 2.236992 |
| 17459363 | Igkv13-87  | immunoglobulin kappa variable 13-87       | 2.579909 | 2.097208 | 2.542909 | 1.981208 | 1.990388 | 1.888826 |
| 17459335 | Igkv14-111 | immunoglobulin kappa variable 14-111      | 2.879942 | 2.884358 | 2.407223 | 2.750836 | 4.01105  | 3.04356  |
| 17459309 | Igkv14-126 | immunoglobulin kappa variable 14-126      | 2.472276 | 2.98386  | 2.045509 | 2.333362 | 1.765822 | 2.045509 |
| 17459300 | Igkv14-130 | immunoglobulin kappa variable 14-130      | 2.768184 | 2.544284 | 2.255364 | 2.774754 | 2.832802 | 1.903824 |
| 17459344 | Igkv16-104 | immunoglobulin kappa variable 16-104      | 3.792896 | 4.982501 | 2.691443 | 3.822801 | 3.753353 | 4.0802   |
| 17459318 | Igkv17-121 | immunoglobulin kappa variable 17-121      | 3.459971 | 4.943799 | 4.647678 | 3.867684 | 3.459971 | 3.098693 |
| 17459306 | Igkv17-127 | immunoglobulin kappa variable 17-127      | 3.654515 | 3.54506  | 3.607652 | 2.569558 | 2.295518 | 2.768914 |
| 17459355 | Igkv1-99   | immunoglobulin kappa variable 1-99        | 11.47299 | 9.148213 | 11.06921 | 8.624256 | 7.549128 | 8.735983 |
| 17459341 | Igkv2-109  | immunoglobulin kappa variable 2-109       | 6.992896 | 5.439975 | 5.301755 | 6.943774 | 4.259252 | 4.440678 |
| 17459332 | Igkv2-112  | immunoglobulin kappa variable 2-112       | 15.8908  | 14.71362 | 12.53708 | 12.53708 | 11.52744 | 16.32227 |
| 17459327 | Igkv2-116  | immunoglobulin kappa variable 2-116       | 5.470717 | 13.51547 | 8.75071  | 6.674501 | 9.710597 | 8.949208 |
| 17467387 | Igkv2-95-2 | immunoglobulin kappa variable 2-95-2      | 2.288544 | 1.906359 | 1.906359 | 2.119861 | 2.013813 | 1.906359 |
| 17459412 | Igkv3-1    | immunoglobulin kappa variable 3-1         | 2.089764 | 1.994255 | 1.945202 | 1.728703 | 2.164704 | 2.177224 |
| 17459392 | Igkv3-10   | immunoglobulin kappa variable 3-10        | 3.890916 | 4.783644 | 3.178751 | 3.103551 | 4.323111 | 3.33406  |
| 17459389 | Igkv3-12   | immunoglobulin kappa variable 3-12        | 23.52822 | 14.54882 | 14.31296 | 13.39423 | 12.47225 | 13.28835 |
| 17459409 | Igkv3-2    | immunoglobulin kappa variable 3-2         | 2.113919 | 2.435335 | 1.85342  | 1.864502 | 3.409925 | 2.202604 |
| 17459406 | Igkv3-3    | immunoglobulin kappa variable 3-3         | 2.031338 | 1.889992 | 2.29528  | 1.768676 | 2.00892  | 2.0903   |
| 17459403 | Igkv3-4    | immunoglobulin kappa variable 3-4         | 2.78912  | 2.953407 | 2.834747 | 2.606909 | 3.415886 | 2.953407 |
| 17459398 | Igkv3-7    | immunoglobulin kappa variable 3-7         | 3.73503  | 2.087375 | 2.216034 | 2.045878 | 2.614509 | 1.795705 |
| 17459395 | Igkv3-9    | immunoglobulin kappa variable 3-9         | 5.723628 | 4.84659  | 4.952648 | 5.463858 | 4.912781 | 3.401875 |
| 17467471 | Igkv4-50   | immunoglobulin kappa variable 4-50        | 3.425442 | 9.373449 | 2.891624 | 3.092428 | 2.88168  | 2.446399 |
| 17467469 | Igkv4-53   | immunoglobulin kappa variable 4-53        | 2.696915 | 2.516537 | 2.899994 | 2.18968  | 2.548521 | 2.085423 |
| 17467466 | Igkv4-55   | immunoglobulin kappa variable 4-55        | 8.36897  | 44.83054 | 9.820864 | 6.312362 | 8.015875 | 7.261411 |
| 17467461 | Igkv4-57   | immunoglobulin kappa variable 4-57        | 16.63927 | 19.25245 | 20.21368 | 17.67122 | 15.48855 | 16.77941 |
| 17467458 | Igkv4-57-1 | immunoglobulin kappa variable 4-57-1      | 3.021929 | 8.707992 | 5.35828  | 2.34689  | 3.220713 | 2.598358 |
| 17467456 | Igkv4-58   | immunoglobulin kappa variable 4-58        | 40.53876 | 41.27396 | 30.03598 | 39.56382 | 43.50683 | 43.81825 |
| 17467453 | Igkv4-59   | immunoglobulin kappa variable 4-59        | 2.236139 | 2.995237 | 3.051968 | 2.778392 | 2.134799 | 4.029107 |
| 17467449 | Igkv4-62   | immunoglobulin kappa variable 4-62        | 14.69008 | 32.69754 | 15.02403 | 13.06142 | 13.04441 | 12.9882  |
| 17467447 | Igkv4-63   | immunoglobulin kappa variable 4-63        | 8.327191 | 4.650513 | 5.722042 | 4.978462 | 7.299714 | 5.320641 |
| 17467441 | Igkv4-68   | immunoglobulin kappa variable 4-68        | 9.123011 | 27.9098  | 8.446303 | 6.529896 | 7.935109 | 8.722006 |
| 17467438 | Igkv4-69   | immunoglobulin kappa variable 4-69        | 3.062691 | 2.953407 | 2.790106 | 2.047963 | 2.118451 | 2.075458 |
| 17467427 | Igkv4-73   | immunoglobulin kappa variable 4-73        | 10.25382 | 19.42873 | 5.723232 | 6.943774 | 11.22684 | 7.045783 |
| 17467424 | Igkv4-74   | immunoglobulin kappa variable 4-74        | 53.23673 | 47.25451 | 43.79851 | 56.7717  | 48.81254 | 58.74687 |
| 17467421 | Igkv4-78   | immunoglobulin kappa variable 4-78        | 6.434107 | 5.780603 | 5.211469 | 3.837376 | 5.125597 | 5.610658 |
| 17467418 | Igkv4-79   | immunoglobulin kappa variable 4-79        | 11.04323 | 10.10537 | 8.619654 | 10.03668 | 8.580847 | 10.81064 |
| 17467415 | Igkv4-80   | immunoglobulin kappa variable 4-80        | 4.789284 | 4.800085 | 4.59075  | 5.994087 | 4.514324 | 3.29231  |
| 17467413 | Igkv4-81   | immunoglobulin kappa variable 4-81        | 2.9702   | 2.418965 | 2.988953 | 2.418965 | 2.601674 | 2.078943 |
| 17467410 | Igkv4-86   | immunoglobulin kappa variable 4-86        | 9.123011 | 7.498178 | 8.399713 | 8.637836 | 6.453447 | 8.399713 |
| 17467395 | Igkv4-92   | immunoglobulin kappa variable 4-92        | 6.35411  | 6.565205 | 7.5585   | 9.975713 | 6.381343 | 11.53663 |
| 17467502 | Igkv5-37   | immunoglobulin kappa variable 5-37        | 2.719554 | 3.883991 | 5.134487 | 4.142667 | 3.1104   | 5.129115 |
| 17467495 | Igkv5-39   | immunoglobulin kappa variable 5-39        | 3.53206  | 3.514185 | 3.129886 | 4.739287 | 3.729055 | 3.767089 |
| 17467474 | Igkv5-48   | immunoglobulin kappa variable 5-48        | 2.622586 | 2.7093   | 2.037514 | 2.070803 | 3.080618 | 3.06473  |
| 17467554 | Igkv6-13   | immunoglobulin kappa variable 6-13        | 3.196072 | 23.79341 | 4.710532 | 4.456744 | 4.956357 | 3.485656 |
| 17467551 | Igkv6-14   | immunoglobulin kappa variable 6-14        | 3.12096  | 2.111225 | 2.130837 | 2.332117 | 2.211293 | 2.211293 |
| 17467548 | Igkv6-15   | immunoglobulin kappa variable 6-15        | 2.435216 | 2.235519 | 2.284233 | 2.262801 | 2.919315 | 2.258571 |
| 17459383 | Igkv6-17   | immunoglobulin kappa variable 6-17        | 2.641651 | 4.208132 | 3.1624   | 2.935304 | 2.997978 | 2.530548 |
| 17467540 | Igkv6-20   | immunoglobulin kappa variable 6-20        | 5.08455  | 7.814535 | 10.07816 | 8.51685  | 6.030928 | 7.057709 |
| 17459423 | Igkv6-23   | immunoglobulin kappa variable 6-23        | 27.28999 | 365.3284 | 167.4109 | 33.75338 | 58.62646 | 26.77046 |
| 17467534 | Igkv6-23   | immunoglobulin kappa variable 6-23        | 2.210082 | 2.214652 | 2.130098 | 2.788211 | 2.849581 | 1.853587 |
| 17467516 | Igkv6-32   | immunoglobulin kappa variable 6-32        | 2.332117 | 3.387357 | 2.255364 | 2.375268 | 2.332117 | 2.285991 |

|          |           |                                                                                    |          |          |          |          |          |          |
|----------|-----------|------------------------------------------------------------------------------------|----------|----------|----------|----------|----------|----------|
| 17467545 | Igkv8-16  | immunoglobulin kappa variable 8-16                                                 | 3.738242 | 3.263862 | 4.647678 | 3.361488 | 4.089034 | 3.820734 |
| 17459380 | Igkv8-18  | immunoglobulin kappa variable 8-18                                                 | 3.536127 | 3.046874 | 3.009972 | 3.007553 | 2.477852 | 2.874159 |
| 17467543 | Igkv8-19  | immunoglobulin kappa variable 8-19                                                 | 6.25318  | 4.070652 | 3.826406 | 3.417331 | 5.38647  | 4.802681 |
| 17467537 | Igkv8-21  | immunoglobulin kappa variable 8-21                                                 | 4.631405 | 5.539708 | 4.003328 | 5.069628 | 3.603303 | 5.280227 |
| 17459374 | Igkv8-26  | immunoglobulin kappa variable 8-26                                                 | 2.449267 | 3.029249 | 3.295186 | 2.40936  | 2.458673 | 2.224822 |
| 17467525 | Igkv8-28  | immunoglobulin kappa variable 8-28                                                 | 6.903988 | 10.5272  | 8.014486 | 7.926918 | 8.736952 | 9.12959  |
| 17467379 | Igkv9-123 | immunoglobulin kappa variable 9-123                                                | 3.739875 | 3.104476 | 3.274331 | 3.429314 | 2.28398  | 2.626006 |
| 17459303 | Igkv9-129 | immunoglobulin kappa variable 9-129                                                | 2.317999 | 2.078899 | 1.771867 | 1.722352 | 2.455063 | 1.789293 |
| 17329016 | Iglc2     | immunoglobulin lambda constant 2                                                   | 4.464535 | 6.155944 | 5.376845 | 4.118389 | 5.798702 | 4.713569 |
| 17329009 | Iglc3     | immunoglobulin lambda constant 3                                                   | 9.700506 | 6.140219 | 8.19708  | 8.036849 | 7.810203 | 11.82583 |
| 17329013 | Iglv1     | immunoglobulin lambda variable 1                                                   | 7.716465 | 10.63774 | 13.13733 | 11.50086 | 8.785839 | 9.395435 |
| 17329023 | Iglv2     | immunoglobulin lambda variable 2                                                   | 3.577843 | 4.20927  | 3.844671 | 3.901449 | 2.651962 | 3.84515  |
| 17329020 | Iglv3     | immunoglobulin lambda variable 3                                                   | 2.812767 | 4.416887 | 3.822059 | 2.712588 | 3.145894 | 1.865006 |
| 17328567 | Igl11     | immunoglobulin lambda-like polypeptide 1                                           | 7.211753 | 7.07755  | 6.410203 | 6.943774 | 8.577873 | 5.866663 |
| 17360920 | Ighmbp2   | immunoglobulin mu binding protein 2                                                | 16.87938 | 15.93017 | 15.91516 | 17.7236  | 13.10295 | 15.93293 |
| 17527661 | Islr      | immunoglobulin superfamily containing leucine-rich repeat                          | 10.54341 | 11.20383 | 11.11996 | 8.01732  | 6.870047 | 9.172786 |
| 17527666 | Islr2     | immunoglobulin superfamily containing leucine-rich repeat 2                        | 4.297269 | 4.321613 | 4.4506   | 4.4506   | 4.74448  | 5.101106 |
| 17518483 | Igdcc3    | immunoglobulin superfamily, DCC subclass, member 3                                 | 11.00716 | 12.50801 | 10.76167 | 10.48438 | 8.482503 | 14.56173 |
| 17518458 | Igdcc4    | immunoglobulin superfamily, DCC subclass, member 4                                 | 7.150678 | 12.55709 | 17.18383 | 7.319829 | 20.26053 | 9.224048 |
| 17541528 | Igsf1     | immunoglobulin superfamily, member 1                                               | 4.702083 | 3.523746 | 3.509073 | 3.519109 | 4.176806 | 4.133317 |
| 17405489 | Igsf10    | immunoglobulin superfamily, member 10                                              | 3.771269 | 4.361638 | 4.072063 | 4.286797 | 3.703322 | 3.68739  |
| 17325651 | Igsf11    | immunoglobulin superfamily, member 11                                              | 181.126  | 176.0718 | 162.9765 | 139.4525 | 115.3369 | 136.6991 |
| 17431938 | Igsf21    | immunoglobulin superfamily, member 21                                              | 11.69995 | 11.32736 | 11.83838 | 12.50367 | 11.68439 | 12.01696 |
| 17487500 | Igsf23    | immunoglobulin superfamily, member 23                                              | 5.901943 | 5.664427 | 5.503083 | 6.811016 | 6.150228 | 5.96619  |
| 17401023 | Igsf3     | immunoglobulin superfamily, member 3                                               | 7.167152 | 7.532141 | 9.465246 | 7.698994 | 7.540081 | 7.698994 |
| 17327524 | Igsf5     | immunoglobulin superfamily, member 5                                               | 48.93619 | 45.06639 | 47.43796 | 39.7921  | 47.41067 | 40.35177 |
| 17495839 | Igsf6     | immunoglobulin superfamily, member 6                                               | 46.33145 | 60.89197 | 74.32677 | 53.34089 | 48.54867 | 49.76536 |
| 17219519 | Igsf8     | immunoglobulin superfamily, member 8                                               | 7.573762 | 8.933218 | 10.26847 | 7.05497  | 8.933218 | 8.813713 |
| 17219554 | Igsf9     | immunoglobulin superfamily, member 9                                               | 5.348113 | 6.960447 | 5.749235 | 7.613448 | 5.463555 | 5.295144 |
| 17515617 | Igsf9b    | immunoglobulin superfamily, member 9B                                              | 6.073424 | 6.992896 | 6.992896 | 7.988862 | 6.384749 | 6.238417 |
| 17227401 | Igfn1     | immunoglobulin-like and fibronectin type III domain containing 1                   | 6.213043 | 6.437632 | 5.626041 | 5.528967 | 5.790508 | 7.211403 |
| 17325373 | Ildr1     | immunoglobulin-like domain containing receptor 1                                   | 6.061522 | 7.074411 | 6.891127 | 6.29061  | 5.112327 | 6.766313 |
| 17219053 | Ildr2     | immunoglobulin-like domain containing receptor 2                                   | 26.56804 | 43.1306  | 45.66351 | 24.46691 | 43.55269 | 23.14903 |
| 17344192 | G6b       | immunoreceptor tyrosine-based inhibitory motif (ITIM) containing platelet recepto  | 13.06323 | 18.60554 | 16.10269 | 13.56164 | 11.24982 | 13.56164 |
| 17302475 | Irg1      | immunoresponsive gene 1                                                            | 4.557176 | 5.121016 | 5.268747 | 5.376957 | 4.350677 | 5.213709 |
| 17373984 | Immp1l    | IMP1 inner mitochondrial membrane peptidase-like (S. cerevisiae)                   | 65.63029 | 59.78783 | 56.92301 | 61.70134 | 57.91399 | 70.4174  |
| 17275223 | Immp2l    | IMP2 inner mitochondrial membrane peptidase-like (S. cerevisiae)                   | 64.09634 | 62.56657 | 55.05799 | 69.15252 | 72.65701 | 80.34186 |
| 17517605 | Imp3      | IMP3, U3 small nucleolar ribonucleoprotein, homolog (yeast)                        | 113.4938 | 112.656  | 95.92068 | 99.09429 | 85.55439 | 114.4275 |
| 17211700 | Imp4      | IMP4, U3 small nucleolar ribonucleoprotein, homolog (yeast)                        | 46.71487 | 49.11732 | 53.82782 | 49.46239 | 49.11732 | 44.96623 |
| 17548906 | Imp4      | IMP4, U3 small nucleolar ribonucleoprotein, homolog (yeast)                        | 19.99753 | 17.93493 | 17.23632 | 12.71818 | 18.79035 | 16.93575 |
| 17348604 | Impact    | impact, RWD domain protein                                                         | 61.56293 | 54.23755 | 48.57392 | 36.72346 | 41.94567 | 46.94436 |
| 17296013 | Ipo11     | importin 11                                                                        | 37.33689 | 35.31233 | 33.66272 | 31.77918 | 31.58418 | 39.41492 |
| 17428967 | Ipo13     | importin 13                                                                        | 23.62169 | 22.70503 | 21.1615  | 24.15885 | 17.01187 | 17.18014 |
| 17306719 | Ipo4      | importin 4                                                                         | 58.97044 | 55.59834 | 53.27844 | 56.89382 | 40.28358 | 52.4747  |
| 17306753 | Ipo4      | importin 4                                                                         | 15.70639 | 14.02161 | 16.55815 | 15.57057 | 11.02579 | 14.88606 |
| 17302773 | Ipo5      | importin 5                                                                         | 72.41316 | 67.66838 | 74.10968 | 74.7976  | 78.22457 | 74.24696 |
| 17481695 | Ipo7      | importin 7                                                                         | 185.0639 | 159.0416 | 134.6154 | 156.1252 | 154.8674 | 150.7872 |
| 17472990 | Ipo8      | importin 8                                                                         | 101.4996 | 94.41211 | 79.74433 | 82.97817 | 103.1414 | 87.40476 |
| 17227320 | Ipo9      | importin 9                                                                         | 45.26456 | 39.71522 | 44.06343 | 48.46663 | 38.62786 | 36.31969 |
| 17491529 | Ipw       | imprinted gene in the Prader-Willi syndrome region                                 | 2.885417 | 3.32635  | 3.009972 | 3.009972 | 3.705094 | 3.009972 |
| 17491535 | Ipw       | imprinted gene in the Prader-Willi syndrome region                                 | 4.681043 | 4.113681 | 4.950108 | 4.20927  | 2.549457 | 8.06928  |
| 17543785 | Xist      | inactive X specific transcripts                                                    | 3.345264 | 3.724405 | 2.62026  | 2.468235 | 3.287384 | 2.639034 |
| 17415635 | Inadl     | InaD-like (Drosophila)                                                             | 19.75957 | 17.58813 | 21.26959 | 19.44814 | 19.29667 | 19.51904 |
| 17486870 | Inafm1    | InaF motif containing 1                                                            | 14.62404 | 15.186   | 15.45391 | 15.43197 | 16.33404 | 14.92563 |
| 17374610 | Inafm2    | InaF motif containing 2                                                            | 43.85684 | 41.53858 | 32.9807  | 41.90266 | 35.11998 | 41.66286 |
| 17512833 | Ist1      | increased sodium tolerance 1 homolog (yeast)                                       | 78.40534 | 95.63322 | 92.45888 | 91.143   | 100.9341 | 99.22144 |
| 17224433 | Ith       | Indian hedgehog                                                                    | 28.87602 | 23.74415 | 26.58812 | 31.29434 | 28.87602 | 32.09174 |
| 17508188 | Ido1      | indoleamine 2,3-dioxygenase 1                                                      | 8.418948 | 6.349399 | 7.965197 | 8.51685  | 6.413136 | 8.115556 |
| 17508174 | Ido2      | indoleamine 2,3-dioxygenase 2                                                      | 103.928  | 93.12135 | 83.48933 | 101.8209 | 89.88323 | 95.01675 |
| 17467062 | Inmt      | indolethylamine N-methyltransferase                                                | 419.3468 | 644.7786 | 550.5539 | 458.542  | 437.5488 | 605.4861 |
| 17213490 | Icos      | inducible T cell co-stimulator                                                     | 7.74422  | 8.029221 | 7.394333 | 6.500272 | 9.42923  | 8.555072 |
| 17218149 | Ivns1abp  | influenza virus NS1A binding protein                                               | 154.4858 | 146.0998 | 164.0464 | 143.8917 | 184.5822 | 193.7456 |
| 17214588 | Inha      | inhibin alpha                                                                      | 8.75702  | 9.488237 | 7.97962  | 9.196341 | 7.767498 | 9.892259 |
| 17245890 | Inhbe     | inhibin beta E                                                                     | 116.573  | 185.6974 | 193.0352 | 162.8229 | 104.4023 | 84.30054 |
| 17285438 | Inhba     | inhibin beta-A                                                                     | 28.60787 | 23.39487 | 13.39247 | 21.94773 | 20.76814 | 15.21139 |
| 17226189 | Inhbb     | inhibin beta-B                                                                     | 8.680993 | 14.41141 | 13.10868 | 16.17787 | 17.64797 | 11.91379 |
| 17245895 | Inhbc     | inhibin beta-C                                                                     | 143.0673 | 84.6196  | 83.58893 | 77.01406 | 81.8063  | 65.17469 |
| 17529322 | Iltk      | inhibitor of Bruton agammaglobulinemia tyrosine kinase                             | 168.3734 | 125.8499 | 132.4175 | 123.3257 | 115.5794 | 94.26629 |
| 17265365 | Inca1     | inhibitor of CDK, cyclin A1 interacting protein 1                                  | 20.92898 | 30.73201 | 35.74724 | 51.84238 | 42.24885 | 37.56117 |
| 17377778 | Id1       | inhibitor of DNA binding 1                                                         | 12.48384 | 14.41951 | 14.24684 | 14.29927 | 13.63129 | 20.14849 |
| 17280310 | Id2       | inhibitor of DNA binding 2                                                         | 324.0831 | 289.5503 | 292.5968 | 310.0915 | 300.6039 | 326.8829 |
| 17420016 | Id3       | inhibitor of DNA binding 3                                                         | 26.62778 | 23.30682 | 30.17078 | 23.30682 | 20.44491 | 26.62778 |
| 17287081 | Id4       | inhibitor of DNA binding 4                                                         | 13.68297 | 7.813452 | 9.920343 | 10.79192 | 10.04559 | 8.522638 |
| 17499028 | Ing1      | inhibitor of growth family, member 1                                               | 32.45368 | 37.9611  | 37.9611  | 33.67719 | 42.82733 | 35.99863 |
| 17509274 | Ing2      | inhibitor of growth family, member 2                                               | 10.33674 | 11.1887  | 14.97475 | 15.40375 | 18.49649 | 14.79656 |
| 17456318 | Ing3      | inhibitor of growth family, member 3                                               | 19.28143 | 20.80531 | 19.68889 | 20.49216 | 17.70028 | 18.00019 |
| 17463020 | Ing4      | inhibitor of growth family, member 4                                               | 47.73912 | 57.09451 | 64.9357  | 67.43333 | 58.69436 | 65.64576 |
| 17216087 | Ing5      | inhibitor of growth family, member 5                                               | 14.67166 | 17.05946 | 12.85119 | 15.14889 | 11.98618 | 14.31961 |
| 17425425 | Ikbkap    | inhibitor of kappa light polypeptide enhancer in B cells, kinase complex-associate | 38.73699 | 26.9604  | 25.44764 | 28.34377 | 31.27223 | 26.14603 |
| 17508082 | Ikbkb     | inhibitor of kappaB kinase beta                                                    | 48.79056 | 43.12253 | 47.38899 | 38.86905 | 36.84482 | 47.38899 |
| 17226771 | Ikbke     | inhibitor of kappaB kinase epsilon                                                 | 32.76106 | 28.20013 | 30.54258 | 31.6497  | 33.35659 | 27.50744 |
| 17535877 | Ikbkg     | inhibitor of kappaB kinase gamma                                                   | 39.1527  | 41.70909 | 39.12612 | 43.91951 | 37.87385 | 38.62786 |
| 17362559 | Incenp    | inner centromere protein                                                           | 7.111579 | 7.225863 | 8.046715 | 7.452735 | 6.370736 | 7.405566 |
| 17459530 | Immt      | inner membrane protein, mitochondrial                                              | 191.7377 | 194.8297 | 187.438  | 208.8408 | 171.1218 | 199.1125 |

|          |          |                                                                  |          |          |          |          |          |          |
|----------|----------|------------------------------------------------------------------|----------|----------|----------|----------|----------|----------|
| 17468113 | Ino80b   | INO80 complex subunit B                                          | 22.57462 | 22.62789 | 21.13043 | 21.23938 | 23.85219 | 20.8518  |
| 17353131 | Ino80c   | INO80 complex subunit C                                          | 16.96759 | 12.60295 | 12.64276 | 12.60295 | 16.80071 | 13.91974 |
| 17223666 | Ino80d   | INO80 complex subunit D                                          | 52.91666 | 73.69424 | 78.107   | 63.78432 | 63.78432 | 65.72088 |
| 17213572 | Ino80dos | INO80 complex subunit D, opposite strand                         | 4.760556 | 3.706404 | 4.647678 | 3.82829  | 5.05363  | 4.334964 |
| 17496438 | Ino80e   | INO80 complex subunit E                                          | 18.64956 | 20.94727 | 19.25445 | 17.7568  | 18.71846 | 27.57311 |
| 17389861 | Ino80    | INO80 homolog (S. cerevisiae)                                    | 38.52973 | 49.41578 | 49.03092 | 52.29895 | 51.11837 | 51.52783 |
| 17465373 | Impdh1   | inosine 5-phosphate dehydrogenase 1                              | 14.31296 | 14.60267 | 15.42961 | 12.45307 | 14.90299 | 15.96588 |
| 17521838 | Impdh2   | inosine 5-phosphate dehydrogenase 2                              | 42.48377 | 48.14286 | 51.22762 | 38.32649 | 49.22775 | 44.04328 |
| 17376378 | Itpa     | inosine triphosphatase (nucleoside triphosphate pyrophosphatase) | 23.50442 | 22.16129 | 22.61597 | 24.12488 | 21.1615  | 21.0146  |
| 17404109 | Impa1    | inositol (myo)-1(or 4)-monophosphatase 1                         | 116.9923 | 104.2281 | 96.81643 | 104.2281 | 106.5362 | 117.4677 |
| 17351446 | Impa2    | inositol (myo)-1(or 4)-monophosphatase 2                         | 19.70213 | 18.21355 | 19.95212 | 18.69901 | 18.83129 | 15.3594  |
| 17287126 | Ippk     | inositol 1,3,4,5,6-pentakisphosphate 2-kinase                    | 13.25817 | 12.26725 | 9.375918 | 11.44607 | 15.14332 | 13.20617 |
| 17283463 | Itpk1    | inositol 1,3,4-triphosphate 5/6 kinase                           | 47.32465 | 49.61382 | 54.87511 | 54.87511 | 47.83683 | 48.60423 |
| 17472777 | Itp2     | inositol 1,4,5-triphosphate receptor 2                           | 71.28072 | 57.42154 | 59.72115 | 62.52191 | 55.54942 | 61.16778 |
| 17335060 | Itp3     | inositol 1,4,5-triphosphate receptor 3                           | 12.08001 | 12.39452 | 12.12296 | 10.39422 | 9.631029 | 10.29534 |
| 17365617 | Itrip    | inositol 1,4,5-triphosphate receptor interacting protein         | 8.583286 | 9.035785 | 8.332908 | 7.293392 | 8.332908 | 8.332908 |
| 17391233 | Itrip1l  | inositol 1,4,5-triphosphate receptor interacting protein-like 1  | 21.20349 | 28.62989 | 34.13406 | 25.67353 | 40.06887 | 36.92894 |
| 17495549 | Itrip12  | inositol 1,4,5-triphosphate receptor interacting protein-like 2  | 9.894316 | 9.894316 | 9.894316 | 9.894316 | 9.894316 | 10.39458 |
| 17374871 | Itpka    | inositol 1,4,5-trisphosphate 3-kinase A                          | 5.51171  | 7.205258 | 5.51171  | 4.896633 | 7.659446 | 5.51171  |
| 17220110 | Itpkb    | inositol 1,4,5-trisphosphate 3-kinase B                          | 27.84024 | 25.06461 | 28.38683 | 24.68461 | 17.94599 | 16.66478 |
| 17488167 | Itpkc    | inositol 1,4,5-trisphosphate 3-kinase C                          | 11.89868 | 12.2455  | 10.20066 | 9.652415 | 12.22498 | 9.110056 |
| 17461341 | Itp1     | inositol 1,4,5-trisphosphate receptor 1                          | 88.54016 | 108.4856 | 107.8947 | 97.86425 | 93.45436 | 89.653   |
| 17521593 | Ip6k1    | inositol hexaphosphate kinase 1                                  | 42.35851 | 47.89224 | 40.05249 | 46.07557 | 49.22775 | 52.38384 |
| 17521902 | Ip6k2    | inositol hexaphosphate kinase 2                                  | 61.41674 | 63.40435 | 60.39637 | 59.68804 | 72.55736 | 69.94165 |
| 17342699 | Ip6k3    | inositol hexaphosphate kinase 3                                  | 14.53007 | 14.87915 | 12.17264 | 14.03386 | 11.43726 | 13.65209 |
| 17423037 | Impad1   | inositol monophosphatase domain containing 1                     | 33.29445 | 33.29445 | 30.61125 | 31.71624 | 33.29445 | 36.79684 |
| 17259810 | Inpp5j   | inositol polyphosphate 5-phosphatase J                           | 5.032272 | 5.669769 | 6.863146 | 6.265719 | 6.265719 | 5.651681 |
| 17253037 | Inpp5k   | inositol polyphosphate 5-phosphatase K                           | 35.88154 | 51.92221 | 51.04543 | 47.8773  | 43.67906 | 44.91514 |
| 17234175 | Ipmk     | inositol polyphosphate multikinase                               | 84.06014 | 98.89461 | 107.7826 | 90.40872 | 115.3569 | 123.6133 |
| 17234185 | Ipmk     | inositol polyphosphate multikinase                               | 6.307945 | 7.846885 | 5.82735  | 6.911553 | 8.829734 | 8.106111 |
| 17493916 | Inpp1    | inositol polyphosphate phosphatase-like 1                        | 34.05465 | 36.62483 | 40.64934 | 32.46785 | 29.75458 | 25.26696 |
| 17222940 | Inpp1    | inositol polyphosphate-1-phosphatase                             | 23.03507 | 26.22262 | 21.16531 | 19.97163 | 19.05873 | 17.04882 |
| 17211939 | Inpp4a   | inositol polyphosphate-4-phosphatase, type I                     | 33.62168 | 37.98848 | 36.88213 | 38.26782 | 45.52509 | 47.96167 |
| 17502816 | Inpp4b   | inositol polyphosphate-4-phosphatase, type II                    | 5.394391 | 6.31871  | 4.571793 | 4.232999 | 3.830705 | 4.668147 |
| 17484382 | Inpp5a   | inositol polyphosphate-5-phosphatase A                           | 34.34385 | 34.34385 | 40.77209 | 34.34385 | 32.5878  | 30.89454 |
| 17418306 | Inpp5b   | inositol polyphosphate-5-phosphatase B                           | 22.54757 | 20.95133 | 22.54757 | 22.54757 | 21.11213 | 20.92376 |
| 17215309 | Inpp5d   | inositol polyphosphate-5-phosphatase D                           | 10.98178 | 13.23733 | 17.37956 | 13.24394 | 12.66495 | 8.215851 |
| 17382993 | Inpp5e   | inositol polyphosphate-5-phosphatase E                           | 10.11728 | 11.45488 | 11.45488 | 10.92098 | 10.79454 | 13.59317 |
| 17483740 | Inpp5f   | inositol polyphosphate-5-phosphatase F                           | 31.19515 | 22.52117 | 20.74972 | 25.77195 | 23.04417 | 18.34583 |
| 17482047 | Insc     | inscuteable homolog (Drosophila)                                 | 25.27519 | 19.57594 | 19.12834 | 21.5305  | 18.95912 | 15.14311 |
| 17364251 | Ide      | insulin degrading enzyme                                         | 256.0532 | 212.851  | 184.0699 | 205.1734 | 174.8483 | 185.9215 |
| 17360301 | Ins1     | insulin I                                                        | 3.229386 | 4.596545 | 3.595419 | 3.875923 | 3.977936 | 3.791162 |
| 17498160 | Ins2     | insulin II                                                       | 4.832735 | 2.875454 | 3.037659 | 4.295988 | 4.532666 | 3.190826 |
| 17435584 | Insig1   | insulin induced gene 1                                           | 521.8314 | 272.645  | 442.2045 | 214.9936 | 460.0032 | 222.3071 |
| 17226346 | Insig2   | insulin induced gene 2                                           | 401.1811 | 263.4271 | 239.5462 | 319.4087 | 244.058  | 249.7672 |
| 17507057 | Insr     | insulin receptor                                                 | 163.7306 | 184.8396 | 189.7637 | 177.7764 | 187.6434 | 188.3889 |
| 17214753 | Irs1     | insulin receptor substrate 1                                     | 4.277714 | 6.943918 | 5.295218 | 5.871381 | 5.120306 | 5.343926 |
| 17224878 | Irs1     | insulin receptor substrate 1                                     | 39.6899  | 53.42563 | 39.6899  | 45.31824 | 37.59763 | 44.14689 |
| 17507374 | Irs2     | insulin receptor substrate 2                                     | 83.82333 | 84.8175  | 81.21082 | 45.5213  | 59.9073  | 56.33306 |
| 17454114 | Irs3     | insulin receptor substrate 3                                     | 7.593105 | 8.535999 | 6.361072 | 7.024424 | 7.250297 | 7.088449 |
| 17545017 | Irs4     | insulin receptor substrate 4                                     | 3.445707 | 3.821423 | 3.566948 | 4.160307 | 3.758169 | 3.937992 |
| 17398825 | Insr     | insulin receptor-related receptor                                | 3.906807 | 4.184717 | 3.578587 | 4.135753 | 4.18202  | 4.20927  |
| 17517532 | Isl2     | insulin related protein 2 (islet 2)                              | 7.569615 | 7.675975 | 7.075588 | 9.851204 | 6.958566 | 8.817135 |
| 17427655 | Insl5    | insulin-like 5                                                   | 2.621477 | 2.591559 | 2.885237 | 3.329049 | 3.18846  | 2.953407 |
| 17363790 | Insl6    | insulin-like 6                                                   | 3.555272 | 2.376272 | 2.886778 | 2.660228 | 2.513278 | 2.88914  |
| 17236288 | Igf1     | insulin-like growth factor 1                                     | 340.6697 | 293.9853 | 313.226  | 294.8035 | 397.4942 | 274.6442 |
| 17243845 | Igf1os   | insulin-like growth factor 1, opposite strand                    | 3.948569 | 3.600607 | 4.37587  | 3.054635 | 3.916161 | 4.213941 |
| 17498142 | Igf2     | insulin-like growth factor 2                                     | 7.784368 | 8.281832 | 7.784368 | 7.594263 | 6.373165 | 6.135454 |
| 17268255 | Igf2bp1  | insulin-like growth factor 2 mRNA binding protein 1              | 5.386432 | 5.081167 | 4.95512  | 5.480889 | 4.896225 | 4.95512  |
| 17329258 | Igf2bp2  | insulin-like growth factor 2 mRNA binding protein 2              | 9.957406 | 14.27699 | 15.42608 | 14.14284 | 11.75376 | 11.10895 |
| 17466641 | Igf2bp3  | insulin-like growth factor 2 mRNA binding protein 3              | 22.18404 | 22.18404 | 24.7978  | 23.9093  | 25.22776 | 17.41816 |
| 17340845 | Igf2r    | insulin-like growth factor 2 receptor                            | 63.32003 | 65.3081  | 72.16013 | 59.10056 | 56.02776 | 64.81384 |
| 17485266 | Igf2os   | insulin-like growth factor 2, opposite strand                    | 5.17791  | 5.468973 | 5.57708  | 5.637596 | 5.318207 | 5.338965 |
| 17247208 | Igfbp1   | insulin-like growth factor binding protein 1                     | 754.1773 | 812.9935 | 991.3976 | 502.3608 | 740.0044 | 716.6625 |
| 17214106 | Igfbp2   | insulin-like growth factor binding protein 2                     | 445.7621 | 569.4992 | 559.5643 | 617.3223 | 453.7079 | 431.9618 |
| 17260474 | Igfbp3   | insulin-like growth factor binding protein 3                     | 50.42335 | 52.49507 | 33.52185 | 44.6838  | 54.31015 | 61.5288  |
| 17256264 | Igfbp4   | insulin-like growth factor binding protein 4                     | 564.2497 | 701.6657 | 795.9809 | 778.9463 | 845.9919 | 821.9176 |
| 17224180 | Igfbp5   | insulin-like growth factor binding protein 5                     | 11.24732 | 8.738769 | 11.58134 | 10.77832 | 8.357492 | 12.18657 |
| 17315305 | Igfbp6   | insulin-like growth factor binding protein 6                     | 8.294931 | 7.469336 | 7.612393 | 7.469336 | 7.469336 | 6.593022 |
| 17449084 | Igfbp7   | insulin-like growth factor binding protein 7                     | 204.5897 | 218.8988 | 233.573  | 199.9853 | 94.00333 | 146.2852 |
| 17334468 | Igfals   | insulin-like growth factor binding protein, acid labile subunit  | 47.54132 | 40.34506 | 41.93782 | 50.72482 | 55.1294  | 32.13559 |
| 17424972 | Igfbp1l  | insulin-like growth factor binding protein-like 1                | 5.330312 | 7.731027 | 7.108672 | 7.467421 | 6.641366 | 7.408133 |
| 17479099 | Igf1r    | insulin-like growth factor I receptor                            | 8.233353 | 8.488267 | 8.52571  | 8.314906 | 11.60175 | 8.900707 |
| 17377253 | Insm1    | insulinoma-associated 1                                          | 15.13892 | 15.78848 | 16.24293 | 16.24293 | 18.36708 | 14.17729 |
| 17275572 | Insm2    | insulinoma-associated 2                                          | 9.597975 | 8.469636 | 10.41037 | 8.480151 | 9.625423 | 8.666443 |
| 17544078 | Itn2a    | integral membrane protein 2A                                     | 4.136126 | 4.136126 | 3.909055 | 4.801649 | 3.947393 | 4.552377 |
| 17308603 | Itn2b    | integral membrane protein 2B                                     | 1568.99  | 1649.108 | 1560.367 | 1560.367 | 1410.744 | 1560.367 |
| 17214998 | Itn2c    | integral membrane protein 2C                                     | 42.56129 | 49.65476 | 52.34972 | 40.2512  | 38.22249 | 45.0992  |
| 17454450 | Ints1    | integrator complex subunit 1                                     | 32.11265 | 29.74407 | 29.18955 | 32.36853 | 26.54632 | 33.0102  |
| 17501609 | Ints10   | integrator complex subunit 10                                    | 16.6448  | 13.87158 | 12.44039 | 14.24417 | 12.98433 | 11.45789 |
| 17402746 | Ints12   | integrator complex subunit 12                                    | 32.49915 | 30.71923 | 26.91484 | 27.97527 | 35.43713 | 27.69339 |
| 17267237 | Ints2    | integrator complex subunit 2                                     | 13.26038 | 9.720294 | 12.88607 | 13.28338 | 10.82414 | 9.805016 |
| 17407272 | Ints3    | integrator complex subunit 3                                     | 55.33959 | 46.43047 | 47.69447 | 50.31198 | 45.09045 | 49.62792 |
| 17480358 | Ints4    | integrator complex subunit 4                                     | 50.76527 | 46.96942 | 47.15831 | 48.66862 | 44.26732 | 55.22961 |

|          |           |                                                                     |          |          |          |          |          |          |
|----------|-----------|---------------------------------------------------------------------|----------|----------|----------|----------|----------|----------|
| 17357276 | Ints5     | integrator complex subunit 5                                        | 20.14556 | 21.77544 | 24.97149 | 23.82625 | 23.22715 | 19.66148 |
| 17307550 | Ints6     | integrator complex subunit 6                                        | 65.65031 | 65.38374 | 60.1132  | 63.09134 | 52.09453 | 52.09453 |
| 17220809 | Ints7     | integrator complex subunit 7                                        | 38.16716 | 39.60443 | 38.01008 | 40.40187 | 39.60443 | 34.80469 |
| 17423228 | Ints8     | integrator complex subunit 8                                        | 32.77946 | 30.961   | 29.76407 | 35.13386 | 31.79526 | 25.78661 |
| 17301342 | Ints9     | integrator complex subunit 9                                        | 36.8944  | 35.23555 | 40.33611 | 35.87582 | 36.69064 | 36.8944  |
| 17296388 | Itga1     | integrin alpha 1                                                    | 92.0675  | 92.0675  | 105.0469 | 92.0675  | 73.35991 | 83.68749 |
| 17518191 | Itga11    | integrin alpha 11                                                   | 4.735511 | 5.146601 | 4.962682 | 4.693552 | 4.543361 | 4.936334 |
| 17296355 | Itga2     | integrin alpha 2                                                    | 5.151669 | 5.018131 | 5.508578 | 7.338067 | 5.768355 | 5.346779 |
| 17270222 | Itga2b    | integrin alpha 2b                                                   | 9.074386 | 10.96292 | 10.14045 | 10.49973 | 10.68237 | 12.17365 |
| 17268137 | Itga3     | integrin alpha 3                                                    | 8.556317 | 10.97364 | 12.08169 | 12.87526 | 11.01174 | 12.71641 |
| 17372307 | Itga4     | integrin alpha 4                                                    | 19.70063 | 13.49927 | 13.23568 | 12.60295 | 16.77929 | 12.60295 |
| 17322369 | Itga5     | integrin alpha 5 (fibronectin receptor alpha)                       | 43.82281 | 28.33435 | 33.168   | 26.76118 | 23.98732 | 24.57756 |
| 17371800 | Itga6     | integrin alpha 6                                                    | 9.06282  | 10.47124 | 13.23476 | 10.94432 | 10.94432 | 9.140607 |
| 17238605 | Itga7     | integrin alpha 7                                                    | 14.64382 | 12.14297 | 17.70788 | 12.81774 | 19.44315 | 14.32973 |
| 17381717 | Itga8     | integrin alpha 8                                                    | 30.19044 | 30.71241 | 30.38126 | 28.30431 | 21.85058 | 27.36159 |
| 17522916 | Itga9     | integrin alpha 9                                                    | 32.73813 | 36.4064  | 42.41786 | 35.38681 | 33.93989 | 36.16895 |
| 17252574 | Itgae     | integrin alpha E, epithelial-associated                             | 3.787905 | 5.352267 | 3.980032 | 4.090338 | 3.488701 | 4.203643 |
| 17511389 | Itfg1     | integrin alpha FG-GAP repeat containing 1                           | 140.2202 | 148.4548 | 124.4886 | 134.8414 | 124.2541 | 119.4042 |
| 17471324 | Itfg2     | integrin alpha FG-GAP repeat containing 2                           | 27.42786 | 24.69231 | 27.42786 | 28.79367 | 29.9273  | 28.75757 |
| 17483264 | Itgal     | integrin alpha L                                                    | 32.79559 | 41.49599 | 45.24919 | 30.38358 | 38.97238 | 29.12871 |
| 17483577 | Itgam     | integrin alpha M                                                    | 7.694086 | 8.174384 | 8.721643 | 7.50577  | 8.219155 | 7.276981 |
| 17372515 | Itgav     | integrin alpha V                                                    | 100.603  | 86.07188 | 82.38844 | 82.40614 | 87.2099  | 78.56746 |
| 17483615 | Itgax     | integrin alpha X                                                    | 5.568042 | 6.396089 | 6.943582 | 6.574677 | 6.413669 | 6.240753 |
| 17507014 | Itgb1     | integrin beta 1 (fibronectin receptor beta)                         | 240.7063 | 221.0854 | 224.6943 | 220.1404 | 217.3054 | 224.6943 |
| 17280194 | Itgb1bp1  | integrin beta 1 binding protein 1                                   | 23.3495  | 24.36114 | 23.78549 | 24.49304 | 24.42726 | 22.47377 |
| 17536759 | Itgb1bp2  | integrin beta 1 binding protein 2                                   | 10.36422 | 11.4272  | 12.59518 | 11.08364 | 8.692855 | 11.05824 |
| 17234647 | Itgb2     | integrin beta 2                                                     | 32.67171 | 44.00544 | 48.46966 | 32.88095 | 34.40294 | 31.96697 |
| 17332473 | Itgb2l    | integrin beta 2-like                                                | 3.240912 | 4.015362 | 4.636062 | 3.874768 | 3.954102 | 3.452664 |
| 17257235 | Itgb3     | integrin beta 3                                                     | 19.68111 | 24.30279 | 20.45228 | 16.70989 | 17.43386 | 18.22908 |
| 17427563 | Itgb3bp   | integrin beta 3 binding protein (beta3-endonexin)                   | 4.223591 | 5.374945 | 5.187718 | 5.469428 | 4.527266 | 5.330312 |
| 17258473 | Itgb4     | integrin beta 4                                                     | 7.711171 | 8.51685  | 8.67997  | 8.51685  | 8.51685  | 6.743932 |
| 17325109 | Itgb5     | integrin beta 5                                                     | 117.9245 | 119.5293 | 140.6007 | 118.1536 | 128.9985 | 118.5088 |
| 17385654 | Itgb6     | integrin beta 6                                                     | 4.11856  | 3.703322 | 3.703322 | 3.809997 | 3.827069 | 3.703322 |
| 17322163 | Itgb7     | integrin beta 7                                                     | 7.451805 | 7.900643 | 6.57878  | 6.582657 | 9.141241 | 6.479534 |
| 17284839 | Itgb8     | integrin beta 8                                                     | 8.668786 | 9.187421 | 9.082692 | 11.42174 | 12.70399 | 10.5958  |
| 17439815 | lbsp      | integrin binding sialoprotein                                       | 3.989727 | 3.581738 | 3.426843 | 4.513823 | 3.982819 | 3.188637 |
| 17481460 | Ilk       | integrin linked kinase                                              | 85.84606 | 102.8181 | 106.8668 | 102.8181 | 91.0546  | 102.8181 |
| 17400650 | Itga10    | integrin, alpha 10                                                  | 6.745802 | 6.056986 | 7.449895 | 5.928224 | 5.117503 | 5.279605 |
| 17483648 | Itgad     | integrin, alpha D                                                   | 4.20927  | 4.20927  | 4.20927  | 4.20927  | 5.368615 | 3.949856 |
| 17302936 | Itgb1l    | integrin, beta-like 1                                               | 3.343456 | 4.207899 | 4.197877 | 4.176169 | 3.984835 | 3.928858 |
| 17225478 | Ilkap     | integrin-linked kinase-associated serine/threonine phosphatase 2C   | 35.73907 | 34.32886 | 35.82885 | 37.66989 | 41.73367 | 37.99085 |
| 17229756 | Itln1     | intelectin 1 (galactofuranose binding)                              | 3.691993 | 4.170875 | 4.626689 | 3.885445 | 5.331088 | 4.822763 |
| 17298267 | Itih4     | inter alpha-trypsin inhibitor, heavy chain 4                        | 1788.693 | 2050.884 | 2217.933 | 1487.609 | 2089.497 | 1723.78  |
| 17239005 | Ipcsf1    | interaction protein for cytohesin exchange factors 1                | 3.010431 | 3.517085 | 3.602379 | 3.749349 | 3.975262 | 3.749349 |
| 17294167 | Ice1      | interactor of little elongation complex ELL subunit 1               | 25.33377 | 26.13009 | 25.41855 | 29.72593 | 24.0746  | 26.56307 |
| 17518935 | Ice2      | interactor of little elongation complex ELL subunit 2               | 22.03996 | 26.75951 | 22.20973 | 28.4921  | 23.53001 | 28.07375 |
| 17366670 | Itih5     | inter-alpha (globulin) inhibitor H5                                 | 39.33168 | 49.65441 | 39.84343 | 54.34668 | 31.48516 | 38.59173 |
| 17538614 | Itih5l-ps | inter-alpha (globulin) inhibitor H5-like, pseudogene                | 4.554997 | 4.271788 | 4.325959 | 4.992595 | 4.367901 | 4.392493 |
| 17304461 | Itih1     | inter-alpha trypsin inhibitor, heavy chain 1                        | 648.845  | 565.1382 | 566.0125 | 579.6507 | 802.3845 | 581.8688 |
| 17381589 | Itih2     | inter-alpha trypsin inhibitor, heavy chain 2                        | 814.2511 | 907.5542 | 949.4248 | 777.7755 | 1069.284 | 982.8517 |
| 17304434 | Itih3     | inter-alpha trypsin inhibitor, heavy chain 3                        | 796.9415 | 895.0969 | 946.9668 | 663.2689 | 1114.878 | 717.1097 |
| 17515074 | Icam1     | intercellular adhesion molecule 1                                   | 28.54409 | 30.94834 | 29.97691 | 21.00251 | 18.79478 | 16.56608 |
| 17270877 | Icam2     | intercellular adhesion molecule 2                                   | 11.43473 | 10.20412 | 15.39788 | 13.23641 | 10.59778 | 8.863583 |
| 17515084 | Icam4     | intercellular adhesion molecule 4, Landsteiner-Wiener blood group   | 7.678742 | 7.678742 | 8.411773 | 7.678742 | 7.678742 | 7.104288 |
| 17515090 | Icam5     | intercellular adhesion molecule 5, telencephalin                    | 6.992896 | 6.287864 | 5.721011 | 5.291585 | 6.752679 | 8.371522 |
| 17327069 | Ifnar1    | interferon (alpha and beta) receptor 1                              | 118.7201 | 110.3551 | 99.50727 | 102.1532 | 111.4552 | 100.028  |
| 17327038 | Ifnar2    | interferon (alpha and beta) receptor 2                              | 275.8003 | 303.4384 | 319.7233 | 287.4625 | 273.6845 | 263.2501 |
| 17230102 | Ifi202b   | interferon activated gene 202B                                      | 2.121508 | 2.628737 | 2.403072 | 2.110464 | 2.357683 | 3.281351 |
| 17230087 | Ifi203    | interferon activated gene 203                                       | 17.68605 | 26.7699  | 28.73446 | 26.92025 | 21.4202  | 27.19463 |
| 17230045 | Ifi204    | interferon activated gene 204                                       | 17.13436 | 15.89521 | 17.50943 | 22.35569 | 17.50943 | 18.62954 |
| 17230111 | Ifi205    | interferon activated gene 205                                       | 15.65813 | 14.35001 | 22.09258 | 18.35626 | 22.39384 | 17.03287 |
| 17415373 | Ifna1     | interferon alpha 1                                                  | 27.20274 | 34.23405 | 35.99214 | 22.29456 | 27.17786 | 22.52148 |
| 17415361 | Ifna11    | interferon alpha 11                                                 | 2.224529 | 1.910341 | 1.931632 | 1.775826 | 1.842954 | 1.837202 |
| 17427077 | Ifna12    | interferon alpha 12                                                 | 2.623986 | 3.05847  | 3.281943 | 3.047508 | 4.103315 | 3.415957 |
| 17427092 | Ifna13    | interferon alpha 13                                                 | 3.138184 | 2.058381 | 2.213869 | 2.377986 | 2.702229 | 2.218093 |
| 17427073 | Ifna14    | interferon alpha 14                                                 | 18.86683 | 14.46315 | 19.49537 | 17.40669 | 14.374   | 19.1752  |
| 17427067 | Ifna15    | interferon alpha 15                                                 | 9.970114 | 10.25524 | 11.23906 | 11.16422 | 10.39199 | 14.21439 |
| 17427096 | Ifna16    | interferon alpha 16                                                 | 2.269068 | 2.597349 | 2.039577 | 2.111429 | 2.255364 | 2.351433 |
| 17427100 | Ifna2     | interferon alpha 2                                                  | 4.241251 | 3.739175 | 3.956652 | 3.94846  | 3.585713 | 6.410247 |
| 17415369 | Ifna4     | interferon alpha 4                                                  | 24.55049 | 29.89723 | 34.81386 | 25.52449 | 20.12476 | 31.24839 |
| 17415367 | Ifna5     | interferon alpha 5                                                  | 17.16229 | 22.17005 | 18.80338 | 20.12365 | 12.04665 | 12.49639 |
| 17415365 | Ifna6     | interferon alpha 6                                                  | 4.20927  | 4.571729 | 4.20927  | 4.103657 | 3.709771 | 4.997962 |
| 17415359 | Ifna7     | interferon alpha 7                                                  | 8.657017 | 8.931546 | 8.986816 | 7.656632 | 6.142304 | 12.33675 |
| 17427075 | Ifna9     | interferon alpha 9                                                  | 2.613567 | 2.596575 | 3.044869 | 2.657095 | 2.574817 | 2.498721 |
| 17427104 | Ifnab     | interferon alpha B                                                  | 3.338986 | 2.986654 | 2.9314   | 3.174083 | 2.109031 | 3.359112 |
| 17427064 | Ifnb1     | interferon beta 1, fibroblast                                       | 4.146804 | 4.146804 | 4.220547 | 3.728874 | 4.497178 | 4.146804 |
| 17427128 | Ifne      | interferon epsilon                                                  | 6.958132 | 7.005995 | 7.009735 | 6.944833 | 6.775089 | 8.835612 |
| 17237589 | Ifng      | interferon gamma                                                    | 3.29866  | 3.883991 | 3.516548 | 3.077012 | 3.339703 | 3.977412 |
| 17249980 | Igtp      | interferon gamma induced GTPase                                     | 64.4398  | 52.90529 | 61.25476 | 80.43101 | 69.98675 | 58.56107 |
| 17510136 | Ifi30     | interferon gamma inducible protein 30                               | 68.5417  | 83.69851 | 131.7227 | 75.0604  | 80.59341 | 69.35317 |
| 17248911 | Ifi47     | interferon gamma inducible protein 47                               | 11.45932 | 8.725695 | 9.15773  | 12.25756 | 11.18893 | 9.016578 |
| 17231859 | Ifngr1    | interferon gamma receptor 1                                         | 57.01185 | 77.29429 | 72.04967 | 53.59439 | 61.65859 | 53.90884 |
| 17327084 | Ifngr2    | interferon gamma receptor 2                                         | 71.91795 | 80.48344 | 68.93238 | 66.65079 | 71.39445 | 74.43917 |
| 17364133 | Ifit1bl2  | interferon induced protein with tetratricopeptide repeats 1B like 2 | 5.353306 | 4.259281 | 4.207082 | 5.567849 | 5.456327 | 5.515952 |

|          |          |                                                                     |          |          |          |          |          |          |
|----------|----------|---------------------------------------------------------------------|----------|----------|----------|----------|----------|----------|
| 17364126 | Ifit1b1  | interferon induced protein with tetratricopeptide repeats 1B like 1 | 3.346702 | 2.803113 | 2.368281 | 3.07424  | 4.428291 | 3.137075 |
| 17484701 | Ifitm1   | interferon induced transmembrane protein 1                          | 3.642503 | 3.531497 | 4.602443 | 4.641593 | 3.861951 | 3.643538 |
| 17498086 | Ifitm10  | interferon induced transmembrane protein 10                         | 8.459134 | 5.525979 | 7.992628 | 6.992896 | 8.395405 | 8.270245 |
| 17497713 | Ifitm2   | interferon induced transmembrane protein 2                          | 68.61918 | 91.31753 | 101.8534 | 73.90192 | 84.3549  | 56.41747 |
| 17357211 | Gm2518   | interferon induced transmembrane protein 2 pseudogene               | 10.7902  | 12.36971 | 14.78405 | 12.01046 | 8.295851 | 12.26793 |
| 17497718 | Ifitm3   | interferon induced transmembrane protein 3                          | 903.199  | 1020.825 | 1154.114 | 1056.751 | 1038.856 | 1063.195 |
| 17497709 | Ifitm5   | interferon induced transmembrane protein 5                          | 5.688428 | 5.576036 | 5.520504 | 5.460526 | 6.178215 | 6.421365 |
| 17497724 | Ifitm6   | interferon induced transmembrane protein 6                          | 5.097041 | 4.12113  | 4.756598 | 3.864629 | 4.12113  | 3.933327 |
| 17328326 | Ifitm7   | interferon induced transmembrane protein 7                          | 4.505196 | 3.918387 | 3.315508 | 3.243429 | 3.759759 | 2.558131 |
| 17385797 | Ifih1    | interferon induced with helicase C domain 1                         | 119.0753 | 93.32295 | 95.97389 | 134.0168 | 129.9065 | 123.85   |
| 17350925 | Iigp1    | interferon inducible GTPase 1                                       | 726.9438 | 667.7388 | 623.8217 | 766.398  | 779.6215 | 699.5581 |
| 17412692 | Ifnk     | interferon kappa                                                    | 2.877069 | 3.344591 | 2.482098 | 3.49829  | 4.920995 | 4.359552 |
| 17488485 | Ifnl2    | interferon lambda 2                                                 | 41.42587 | 58.0084  | 47.7805  | 45.92284 | 48.6167  | 63.5945  |
| 17475863 | Ifnl3    | interferon lambda 3                                                 | 17.37113 | 25.96111 | 21.74105 | 21.31164 | 17.04291 | 18.82881 |
| 17419880 | Ifnlr1   | interferon lambda receptor 1                                        | 5.330682 | 5.936489 | 6.743418 | 5.1983   | 6.040299 | 4.567928 |
| 17249593 | Irf1     | interferon regulatory factor 1                                      | 27.01521 | 30.13003 | 41.93404 | 32.88984 | 40.36044 | 37.53436 |
| 17501050 | Irf2     | interferon regulatory factor 2                                      | 91.62758 | 95.50604 | 96.23501 | 92.96012 | 128.1411 | 118.152  |
| 17474396 | Irf2bp1  | interferon regulatory factor 2 binding protein 1                    | 23.26034 | 20.28498 | 22.92596 | 24.24054 | 21.87089 | 21.7919  |
| 17506938 | Irf2bp2  | interferon regulatory factor 2 binding protein 2                    | 16.2834  | 16.67078 | 16.27167 | 21.18528 | 15.77316 | 16.13532 |
| 17514243 | Irf2bp2  | interferon regulatory factor 2 binding protein 2                    | 138.7515 | 151.9118 | 125.6511 | 112.4944 | 124.9217 | 151.612  |
| 17282776 | Irf2bpl  | interferon regulatory factor 2 binding protein-like                 | 30.00997 | 27.2001  | 35.09443 | 35.90319 | 38.11614 | 43.79244 |
| 17477655 | Irf3     | interferon regulatory factor 3                                      | 39.38051 | 32.48856 | 26.03246 | 33.95566 | 27.94561 | 29.41602 |
| 17286295 | Irf4     | interferon regulatory factor 4                                      | 4.971117 | 4.838702 | 4.026901 | 4.507602 | 4.570525 | 5.799908 |
| 17456692 | Irf5     | interferon regulatory factor 5                                      | 7.08673  | 7.866435 | 7.585583 | 9.989275 | 8.713305 | 8.775614 |
| 17220907 | Irf6     | interferon regulatory factor 6                                      | 76.96443 | 58.66955 | 78.00529 | 72.53674 | 69.76396 | 57.93326 |
| 17497813 | Irf7     | interferon regulatory factor 7                                      | 95.55172 | 66.9267  | 84.76871 | 115.1292 | 94.9858  | 104.4885 |
| 17506279 | Irf8     | interferon regulatory factor 8                                      | 15.52186 | 16.62405 | 18.24197 | 14.94685 | 19.62866 | 14.2585  |
| 17300591 | Irf9     | interferon regulatory factor 9                                      | 48.85926 | 48.85926 | 54.68677 | 56.96287 | 41.03122 | 55.66351 |
| 17398888 | Isg20l2  | interferon stimulated exonuclease gene 20-like 2                    | 26.96732 | 29.20351 | 32.9583  | 33.2993  | 35.572   | 36.6162  |
| 17415319 | Ifnz     | interferon zeta                                                     | 3.644169 | 4.165588 | 4.437601 | 3.263862 | 5.409555 | 5.048238 |
| 17278200 | Ifi27    | interferon, alpha-inducible protein 27                              | 248.8961 | 208.8828 | 160.4111 | 230.8721 | 236.2385 | 234.5432 |
| 17283549 | Ifi27l2a | interferon, alpha-inducible protein 27 like 2A                      | 18.76432 | 20.22854 | 20.14961 | 22.95219 | 20.22854 | 20.22854 |
| 17283556 | Ifi27l2b | interferon, alpha-inducible protein 27 like 2B                      | 37.96794 | 38.10953 | 43.31095 | 36.77236 | 32.8732  | 40.96103 |
| 17230055 | Gm16340  | interferon-activable protein 203-like                               | 28.84301 | 31.89437 | 33.9931  | 38.80687 | 41.4773  | 40.25539 |
| 17256734 | Ifi35    | interferon-induced protein 35                                       | 65.15934 | 73.0276  | 67.71343 | 90.09468 | 78.2875  | 78.85826 |
| 17411147 | Ifi44    | interferon-induced protein 44                                       | 87.67903 | 52.32614 | 70.08044 | 85.9729  | 50.12332 | 83.49223 |
| 17411159 | Ifi44l   | interferon-induced protein 44 like                                  | 2.300185 | 2.655825 | 2.914079 | 2.509465 | 2.40189  | 1.978463 |
| 17358832 | Ifit1    | interferon-induced protein with tetratricopeptide repeats 1         | 36.97838 | 19.98825 | 26.98302 | 50.09032 | 32.19512 | 52.09453 |
| 17358815 | Ifit2    | interferon-induced protein with tetratricopeptide repeats 2         | 6.992896 | 5.760324 | 5.824806 | 7.589106 | 5.700269 | 5.900675 |
| 17358821 | Ifit3    | interferon-induced protein with tetratricopeptide repeats 3         | 14.67898 | 21.78691 | 13.96042 | 14.5017  | 17.01706 | 23.88942 |
| 17358825 | Ifit3b   | interferon-induced protein with tetratricopeptide repeats 3B        | 4.13581  | 4.17342  | 3.501177 | 3.960822 | 3.817425 | 5.621987 |
| 17280842 | Ifrd1    | interferon-related developmental regulator 1                        | 31.60257 | 29.36509 | 35.22432 | 23.52985 | 30.22771 | 23.0867  |
| 17521454 | Ifrd2    | interferon-related developmental regulator 2                        | 109.7031 | 112.503  | 100.4943 | 93.74371 | 75.31263 | 95.47294 |
| 17479317 | Isg20    | interferon-stimulated protein                                       | 26.39843 | 31.66594 | 41.30143 | 31.46116 | 28.427   | 18.31305 |
| 17391554 | Il1a     | interleukin 1 alpha                                                 | 16.72425 | 16.82903 | 14.80333 | 17.16467 | 12.21041 | 13.86812 |
| 17391565 | Il1b     | interleukin 1 beta                                                  | 9.404948 | 14.67959 | 16.6229  | 16.56608 | 15.60882 | 16.56608 |
| 17376159 | Il1bos   | interleukin 1 beta, opposite strand                                 | 4.563972 | 4.588333 | 3.598261 | 3.703322 | 5.318244 | 5.692135 |
| 17367676 | Il1f10   | interleukin 1 family, member 10                                     | 8.609563 | 8.817746 | 7.900369 | 9.51933  | 10.65294 | 8.914476 |
| 17367666 | Il1f5    | interleukin 1 family, member 5 (delta)                              | 3.689742 | 4.093883 | 3.293542 | 2.904078 | 3.263862 | 3.353738 |
| 17367659 | Il1f6    | interleukin 1 family, member 6                                      | 4.031593 | 3.979204 | 4.452668 | 4.720894 | 4.16862  | 4.06321  |
| 17367644 | Il1f8    | interleukin 1 family, member 8                                      | 2.321006 | 2.650896 | 2.481049 | 2.657851 | 2.755779 | 2.942801 |
| 17367652 | Il1f9    | interleukin 1 family, member 9                                      | 3.272765 | 3.517426 | 3.50917  | 4.047048 | 4.414377 | 3.368088 |
| 17324522 | Il1rap   | interleukin 1 receptor accessory protein                            | 68.63916 | 53.48565 | 48.40788 | 61.17668 | 57.28041 | 63.45623 |
| 17324542 | Il1rap   | interleukin 1 receptor accessory protein                            | 4.349712 | 3.669262 | 3.379594 | 4.258632 | 4.910875 | 4.886969 |
| 17543087 | Il1rapl1 | interleukin 1 receptor accessory protein-like 1                     | 2.636456 | 2.655954 | 2.99146  | 3.178773 | 2.483371 | 2.925615 |
| 17538004 | Il1rapl2 | interleukin 1 receptor accessory protein-like 2                     | 2.458673 | 2.408542 | 2.727993 | 2.210879 | 2.493375 | 2.643721 |
| 17367686 | Il1rn    | interleukin 1 receptor antagonist                                   | 10.20893 | 19.33027 | 22.54976 | 16.4078  | 17.16526 | 18.68813 |
| 17212185 | Il1r1    | interleukin 1 receptor, type I                                      | 77.78284 | 88.82907 | 82.49473 | 107.7183 | 128.6119 | 90.61324 |
| 17212174 | Il1r2    | interleukin 1 receptor, type II                                     | 4.337368 | 3.799817 | 4.20927  | 4.20927  | 3.967114 | 4.136068 |
| 17212211 | Il1r1l   | interleukin 1 receptor-like 1                                       | 3.89356  | 3.156291 | 3.120398 | 3.411154 | 5.205656 | 3.623842 |
| 17212199 | Il1r1l2  | interleukin 1 receptor-like 2                                       | 3.714582 | 3.189345 | 3.364099 | 4.078108 | 3.187731 | 3.320568 |
| 17216990 | Il10     | interleukin 10                                                      | 2.979169 | 2.829094 | 3.08378  | 3.361488 | 3.207213 | 2.885457 |
| 17526492 | Il10ra   | interleukin 10 receptor, alpha                                      | 9.376243 | 10.54794 | 10.31785 | 11.41754 | 9.198573 | 7.901738 |
| 17327054 | Il10rb   | interleukin 10 receptor, beta                                       | 30.0764  | 34.20487 | 46.13085 | 34.99168 | 27.03038 | 28.96201 |
| 17245312 | Il1t1f   | interleukin 10-related T cell-derived inducible factor beta         | 2.100671 | 1.799892 | 1.98912  | 1.860551 | 2.2349   | 2.115575 |
| 17485924 | Il11     | interleukin 11                                                      | 2.960108 | 4.160336 | 3.672239 | 3.672239 | 3.986078 | 4.100387 |
| 17412913 | Il11ra1  | interleukin 11 receptor, alpha chain 1                              | 11.35936 | 13.42667 | 13.25119 | 12.85333 | 12.81392 | 17.3508  |
| 17502051 | Il12rb1  | interleukin 12 receptor, beta 1                                     | 10.73225 | 10.7176  | 10.082   | 10.7176  | 10.40843 | 12.24975 |
| 17467323 | Il12rb2  | interleukin 12 receptor, beta 2                                     | 4.158202 | 3.891051 | 3.60198  | 3.747764 | 4.352909 | 2.97364  |
| 17398218 | Il12a    | interleukin 12a                                                     | 4.136126 | 4.568308 | 4.596864 | 4.411288 | 3.899043 | 4.592692 |
| 17248654 | Il12b    | interleukin 12b                                                     | 12.22693 | 13.66885 | 13.66885 | 11.99449 | 14.31296 | 16.00499 |
| 17262695 | Il13     | interleukin 13                                                      | 5.821214 | 6.594942 | 7.484002 | 7.151967 | 6.917832 | 6.557337 |
| 17534051 | Il13ra1  | interleukin 13 receptor, alpha 1                                    | 136.8508 | 141.9658 | 140.7109 | 119.0299 | 213.1049 | 125.3615 |
| 17545181 | Il13ra2  | interleukin 13 receptor, alpha 2                                    | 4.273239 | 3.681771 | 3.282784 | 3.977936 | 3.507979 | 2.840451 |
| 17510856 | Il15     | interleukin 15                                                      | 7.698994 | 7.698994 | 7.698994 | 5.634353 | 7.869162 | 7.657482 |
| 17367004 | Il15ra   | interleukin 15 receptor, alpha chain                                | 26.36843 | 35.51755 | 35.78046 | 37.92954 | 34.27227 | 38.28082 |
| 17492905 | Il16     | interleukin 16                                                      | 5.952229 | 6.508973 | 6.680796 | 7.226014 | 6.597548 | 6.482409 |
| 17462351 | Il17ra   | interleukin 17 receptor A                                           | 42.08663 | 41.9169  | 43.09444 | 47.34828 | 36.95916 | 43.09444 |
| 17304338 | Il17rb   | interleukin 17 receptor B                                           | 28.87142 | 28.4546  | 45.49922 | 24.61882 | 30.08912 | 29.96113 |
| 17461703 | Il17rc   | interleukin 17 receptor C                                           | 65.79427 | 73.71979 | 90.03537 | 76.33379 | 65.70585 | 74.5259  |
| 17298021 | Il17rd   | interleukin 17 receptor D                                           | 5.34063  | 5.808276 | 4.825539 | 5.952683 | 4.798089 | 5.602497 |
| 17461684 | Il17re   | interleukin 17 receptor E                                           | 6.39569  | 4.964437 | 6.350103 | 5.981967 | 5.097006 | 6.278674 |
| 17211369 | Il17a    | interleukin 17A                                                     | 4.577024 | 4.276024 | 4.680978 | 2.956376 | 5.03475  | 3.874338 |
| 17351137 | Il17b    | interleukin 17B                                                     | 3.377838 | 3.314198 | 3.401215 | 3.309538 | 3.393726 | 3.252885 |

|          |           |                                                                                  |          |          |          |          |          |          |
|----------|-----------|----------------------------------------------------------------------------------|----------|----------|----------|----------|----------|----------|
| 17506392 | Il17c     | interleukin 17C                                                                  | 8.370246 | 10.03793 | 9.792722 | 7.848245 | 7.642634 | 9.442376 |
| 17300921 | Il17d     | interleukin 17D                                                                  | 9.18271  | 11.02816 | 10.20073 | 9.828287 | 9.814195 | 11.37512 |
| 17221627 | Il17f     | interleukin 17F                                                                  | 5.562371 | 5.526247 | 6.902792 | 5.72716  | 5.423334 | 4.870973 |
| 17517105 | Il18      | interleukin 18                                                                   | 30.09621 | 27.06901 | 38.31109 | 28.80505 | 31.95833 | 41.79504 |
| 17493995 | Il18bp    | interleukin 18 binding protein                                                   | 41.68192 | 44.09429 | 65.7259  | 36.70793 | 52.67841 | 48.61131 |
| 17212229 | Il18r1    | interleukin 18 receptor 1                                                        | 5.025545 | 3.905751 | 4.20927  | 4.199856 | 4.607678 | 4.20927  |
| 17212252 | Il18rap   | interleukin 18 receptor accessory protein                                        | 3.631285 | 3.885903 | 3.952869 | 3.781451 | 4.911147 | 3.88655  |
| 17226728 | Il19      | interleukin 19                                                                   | 7.069558 | 7.858097 | 10.00896 | 7.917363 | 6.016064 | 6.581151 |
| 17404880 | Il2       | interleukin 2                                                                    | 2.661003 | 2.235504 | 2.528129 | 2.791654 | 2.165995 | 2.28929  |
| 17366992 | Il2ra     | interleukin 2 receptor, alpha chain                                              | 4.39231  | 4.64581  | 4.39231  | 4.39231  | 4.904377 | 4.904377 |
| 17319009 | Il2rb     | interleukin 2 receptor, beta chain                                               | 7.517485 | 7.15633  | 6.848937 | 6.820985 | 5.514232 | 6.334628 |
| 17543572 | Il2rg     | interleukin 2 receptor, gamma chain                                              | 18.44605 | 19.34595 | 25.70559 | 17.29077 | 18.9385  | 17.14778 |
| 17226720 | Il20      | interleukin 20                                                                   | 4.681043 | 4.238695 | 3.948159 | 4.103799 | 4.732885 | 4.992526 |
| 17530115 | Il20rb    | interleukin 20 receptor beta                                                     | 4.465216 | 4.20927  | 4.601391 | 4.20927  | 4.352065 | 3.366198 |
| 17231881 | Il20ra    | interleukin 20 receptor, alpha                                                   | 4.303618 | 4.595526 | 4.250434 | 4.126389 | 5.152884 | 3.7081   |
| 17404888 | Il21      | interleukin 21                                                                   | 4.684386 | 4.412144 | 3.650262 | 4.56682  | 3.569569 | 4.886969 |
| 17482958 | Il21r     | interleukin 21 receptor                                                          | 4.844138 | 5.03475  | 5.454549 | 6.665162 | 4.365873 | 5.883889 |
| 17237581 | Il22      | interleukin 22                                                                   | 2.086883 | 1.865006 | 1.714895 | 2.447875 | 2.188921 | 1.766691 |
| 17419890 | Il22ra1   | interleukin 22 receptor, alpha 1                                                 | 23.30859 | 38.37806 | 39.97677 | 30.85388 | 24.83616 | 34.19041 |
| 17231869 | Il22ra2   | interleukin 22 receptor, alpha 2                                                 | 2.825742 | 3.047233 | 2.982744 | 3.029207 | 3.56371  | 2.762664 |
| 17467345 | Il23r     | interleukin 23 receptor                                                          | 3.331034 | 2.721345 | 2.452971 | 3.98992  | 2.942679 | 2.34156  |
| 17246091 | Il23a     | interleukin 23, alpha subunit p19                                                | 4.765805 | 4.536375 | 4.081134 | 4.359008 | 5.520428 | 4.137301 |
| 17226708 | Il24      | interleukin 24                                                                   | 5.30363  | 6.488612 | 5.946703 | 4.801649 | 5.751866 | 4.995226 |
| 17300376 | Il25      | interleukin 25                                                                   | 11.24467 | 14.07146 | 12.80531 | 12.60295 | 12.33059 | 12.21829 |
| 17496338 | Il27      | interleukin 27                                                                   | 14.8174  | 21.31578 | 18.58775 | 19.25472 | 18.69979 | 18.40021 |
| 17510594 | Il27ra    | interleukin 27 receptor, alpha                                                   | 14.90526 | 14.84371 | 15.82452 | 16.96995 | 13.30171 | 13.81956 |
| 17262823 | Il3       | interleukin 3                                                                    | 3.871681 | 4.040517 | 3.319394 | 4.135495 | 3.362397 | 3.362397 |
| 17297211 | Il3ra     | interleukin 3 receptor, alpha chain                                              | 15.26674 | 17.60764 | 15.5655  | 11.51378 | 14.82079 | 18.42356 |
| 17452609 | Il31      | interleukin 31                                                                   | 4.357226 | 4.031928 | 4.119131 | 4.472433 | 5.425101 | 3.848457 |
| 17296203 | Il31ra    | interleukin 31 receptor A                                                        | 5.601798 | 5.125917 | 5.331347 | 6.796396 | 5.601798 | 6.548071 |
| 17358598 | Il33      | interleukin 33                                                                   | 12.66223 | 11.46981 | 12.44936 | 11.11241 | 9.521969 | 8.956531 |
| 17512895 | Il34      | interleukin 34                                                                   | 6.30353  | 8.487796 | 7.814535 | 8.597159 | 6.565387 | 7.722564 |
| 17262683 | Il4       | interleukin 4                                                                    | 3.784073 | 3.563735 | 3.339703 | 3.106564 | 3.751766 | 3.3385   |
| 17482943 | Il4ra     | interleukin 4 receptor, alpha                                                    | 45.04422 | 46.22592 | 59.26671 | 44.16097 | 46.07684 | 37.51875 |
| 17249586 | Il5       | interleukin 5                                                                    | 4.058706 | 4.131713 | 3.734823 | 3.852861 | 4.764022 | 5.022968 |
| 17469541 | Il5ra     | interleukin 5 receptor, alpha                                                    | 3.437429 | 4.376143 | 4.986992 | 3.857564 | 4.469799 | 3.646494 |
| 17435725 | Il6       | interleukin 6                                                                    | 3.049748 | 2.005414 | 2.470923 | 2.335821 | 2.056384 | 3.081686 |
| 17407138 | Il6ra     | interleukin 6 receptor, alpha                                                    | 86.45036 | 129.6421 | 136.094  | 140.9364 | 171.027  | 156.37   |
| 17289889 | Il6st     | interleukin 6 signal transducer                                                  | 333.5733 | 312.3089 | 386.7239 | 297.1732 | 247.4066 | 223.4797 |
| 17403994 | Il7       | interleukin 7                                                                    | 3.79019  | 3.524943 | 3.556159 | 3.484085 | 3.348349 | 3.350833 |
| 17315891 | Il7r      | interleukin 7 receptor                                                           | 3.244779 | 2.962058 | 2.696335 | 2.987813 | 3.68195  | 3.306512 |
| 17293013 | Il9       | interleukin 9                                                                    | 3.876487 | 2.996877 | 2.423832 | 2.801773 | 3.164352 | 3.656922 |
| 17261458 | Il9r      | interleukin 9 receptor                                                           | 7.698994 | 7.698994 | 7.293392 | 7.998281 | 6.030928 | 8.140402 |
| 17399754 | Ilf2      | interleukin enhancer binding factor 2                                            | 39.34095 | 36.29452 | 41.44655 | 34.4163  | 35.56805 | 51.98091 |
| 17515170 | Ilf3      | interleukin enhancer binding factor 3                                            | 22.65158 | 27.66193 | 23.30181 | 24.51019 | 27.55286 | 27.99137 |
| 17542546 | Ilrsk1    | interleukin-1 receptor-associated kinase 1                                       | 30.77059 | 41.86115 | 39.37178 | 35.29446 | 43.76999 | 40.7735  |
| 17519888 | Ilrsk1bp1 | interleukin-1 receptor-associated kinase 1 binding protein 1                     | 4.582326 | 4.339504 | 7.173613 | 5.222027 | 4.473395 | 6.124109 |
| 17461807 | Ilrsk2    | interleukin-1 receptor-associated kinase 2                                       | 53.50011 | 48.19762 | 52.18235 | 48.90364 | 43.70056 | 44.45334 |
| 17245399 | Ilrsk3    | interleukin-1 receptor-associated kinase 3                                       | 15.5791  | 15.5153  | 15.49327 | 11.13531 | 14.04028 | 9.853116 |
| 17314460 | Ilrsk4    | interleukin-1 receptor-associated kinase 4                                       | 67.45203 | 61.98168 | 61.71803 | 53.39897 | 70.84087 | 51.94885 |
| 17463126 | Ilf1      | intermediate filament family orphan 1                                            | 15.31656 | 18.88318 | 18.15116 | 19.00794 | 17.26466 | 15.18589 |
| 17420761 | Ilf2      | intermediate filament family orphan 2                                            | 21.41901 | 25.33149 | 23.90168 | 25.33149 | 25.33149 | 30.50957 |
| 17472737 | Ilftd1    | intermediate filament tail domain containing 1                                   | 2.704928 | 3.263862 | 3.263862 | 3.558675 | 3.263862 | 3.414963 |
| 17360109 | Ilina     | interneuron neuronal intermediate filament protein, alpha                        | 3.893183 | 4.192323 | 5.636541 | 5.2058   | 4.088127 | 5.412856 |
| 17529199 | Ilmpg1    | interphotoreceptor matrix proteoglycan 1                                         | 5.144889 | 3.968077 | 3.289983 | 3.610378 | 3.703322 | 4.108979 |
| 17326295 | Ilmpg2    | interphotoreceptor matrix proteoglycan 2                                         | 5.862679 | 6.142134 | 6.885732 | 6.472217 | 6.584619 | 8.323267 |
| 17327137 | Iltsn1    | intersectin 1 (SH3 domain protein 1A)                                            | 25.83276 | 30.1008  | 30.96443 | 24.71012 | 26.73838 | 22.10958 |
| 17273751 | Iltsn2    | intersectin 2                                                                    | 42.42962 | 50.91116 | 48.85282 | 43.42759 | 46.30641 | 45.54592 |
| 17519619 | Ick       | intestinal cell kinase                                                           | 51.00193 | 36.41775 | 47.23944 | 43.75118 | 41.22764 | 40.39514 |
| 17502527 | Isx       | intestine specific homeobox                                                      | 4.681043 | 5.073073 | 4.4778   | 5.032307 | 5.799345 | 5.050793 |
| 17461996 | Ift122    | intraflagellar transport 122                                                     | 9.301672 | 7.377439 | 9.644457 | 11.85168 | 7.629402 | 7.176597 |
| 17334502 | Ift140    | intraflagellar transport 140                                                     | 16.78395 | 13.82751 | 17.19742 | 17.49863 | 19.85623 | 18.89549 |
| 17446930 | Ift172    | intraflagellar transport 172                                                     | 20.9039  | 19.75519 | 17.54624 | 22.89785 | 19.96222 | 16.85506 |
| 17253688 | Ift20     | intraflagellar transport 20                                                      | 167.7094 | 170.0152 | 146.0228 | 154.5147 | 169.8044 | 161.1589 |
| 17443461 | Ift22     | intraflagellar transport 22                                                      | 9.644524 | 13.39423 | 13.84152 | 12.76437 | 11.49066 | 13.01434 |
| 17318932 | Ift27     | intraflagellar transport 27                                                      | 25.90844 | 23.78648 | 21.40194 | 26.01226 | 22.26244 | 15.43764 |
| 17277472 | Ift43     | intraflagellar transport 43                                                      | 22.60829 | 21.52319 | 22.91626 | 26.97722 | 24.58864 | 19.81128 |
| 17516666 | Ift46     | intraflagellar transport 46                                                      | 28.88563 | 26.11162 | 24.72965 | 27.19199 | 25.78553 | 29.61528 |
| 17379187 | Ift52     | intraflagellar transport 52                                                      | 37.76741 | 33.63124 | 34.86071 | 41.62793 | 36.72168 | 37.91298 |
| 17326147 | Ift57     | intraflagellar transport 57                                                      | 12.52935 | 12.56379 | 12.42927 | 12.62779 | 13.1045  | 14.32546 |
| 17415439 | Ift74     | intraflagellar transport 74                                                      | 4.826141 | 5.685235 | 5.083281 | 5.722875 | 5.176977 | 5.647647 |
| 17405764 | Ift80     | intraflagellar transport 80                                                      | 5.758488 | 5.722914 | 6.945892 | 6.212612 | 5.009095 | 6.275063 |
| 17452430 | Ift81     | intraflagellar transport 81                                                      | 5.656501 | 7.271132 | 7.066961 | 6.27763  | 7.766421 | 6.943437 |
| 17300893 | Ift88     | intraflagellar transport 88                                                      | 13.86831 | 11.52816 | 12.38584 | 11.01868 | 10.14383 | 14.73801 |
| 17307148 | Ift88os   | intraflagellar transport 88, opposite strand [Source:MGI Symbol;Acc:MGI:1919181] | 6.96315  | 6.423769 | 7.792682 | 7.067255 | 6.867095 | 6.380679 |
| 17425855 | Inip      | INTS3 and NABP interacting protein                                               | 11.76346 | 10.24395 | 8.974179 | 7.255223 | 8.15113  | 8.356565 |
| 17397208 | Intu      | inturned planar cell polarity effector homolog (Drosophila)                      | 7.846939 | 8.364446 | 8.084508 | 8.084508 | 7.846341 | 7.282178 |
| 17413978 | Invs      | inversin                                                                         | 17.27292 | 13.2047  | 13.34752 | 13.3805  | 17.89147 | 17.43205 |
| 17279324 | Inf2      | inverted formin, FH2 and WH2 domain containing                                   | 29.7746  | 30.02766 | 34.26016 | 31.86675 | 34.19468 | 37.21133 |
| 17407418 | Ivl       | involucrin                                                                       | 3.610378 | 3.883991 | 3.963651 | 3.32831  | 3.883991 | 5.243027 |
| 17231358 | Iyd       | iodotyrosine deiodinase                                                          | 159.3406 | 160.4011 | 163.1709 | 148.1639 | 191.7682 | 187.3393 |
| 17325386 | Iqcb1     | IQ calmodulin-binding motif containing 1                                         | 9.622622 | 9.428185 | 10.18165 | 10.27966 | 9.511811 | 9.622622 |
| 17468933 | Iqsec1    | IQ motif and Sec7 domain 1                                                       | 42.53209 | 49.18137 | 59.09442 | 45.74747 | 36.81878 | 43.33768 |
| 17538891 | Iqsec2    | IQ motif and Sec7 domain 2                                                       | 12.63216 | 9.807055 | 11.34087 | 10.56368 | 7.852108 | 10.31413 |

|          |              |                                                                |          |          |          |          |          |          |
|----------|--------------|----------------------------------------------------------------|----------|----------|----------|----------|----------|----------|
| 17470515 | Iqsec3       | IQ motif and Sec7 domain 3                                     | 5.632088 | 7.027931 | 5.617429 | 6.585715 | 6.752117 | 6.229084 |
| 17465186 | Iqub         | IQ motif and ubiquitin domain containing                       | 3.062691 | 2.67402  | 2.715673 | 2.67402  | 2.613404 | 2.736155 |
| 17430462 | Iqcc         | IQ motif containing C                                          | 12.02087 | 10.58897 | 11.21393 | 12.74978 | 12.55813 | 12.47926 |
| 17441692 | Iqcd         | IQ motif containing D                                          | 8.464472 | 10.45912 | 11.09302 | 10.78422 | 11.58551 | 11.24366 |
| 17454590 | Iqce         | IQ motif containing E                                          | 6.576728 | 11.37347 | 12.89706 | 10.56565 | 8.165946 | 11.61623 |
| 17521252 | Iqcf1        | IQ motif containing F1                                         | 4.490419 | 3.849844 | 4.490419 | 4.103657 | 3.629121 | 4.494685 |
| 17530719 | Iqcf3        | IQ motif containing F3                                         | 5.685038 | 6.702224 | 5.009546 | 5.761762 | 5.28063  | 7.491891 |
| 17530728 | Iqcf4        | IQ motif containing F4                                         | 4.444497 | 4.31156  | 4.946609 | 4.197906 | 4.074294 | 4.336226 |
| 17521256 | Iqcf5        | IQ motif containing F5                                         | 3.139468 | 3.661285 | 3.914668 | 3.419535 | 5.061553 | 3.840143 |
| 17521259 | Iqcf6        | IQ motif containing F6                                         | 6.171709 | 6.171709 | 5.394353 | 6.323617 | 6.644037 | 6.289564 |
| 17329906 | Iqcg         | IQ motif containing G                                          | 12.24635 | 9.15919  | 11.70838 | 12.89062 | 10.99884 | 13.55149 |
| 17492661 | Iqgap1       | IQ motif containing GTPase activating protein 1                | 27.2216  | 34.03459 | 46.50326 | 31.78204 | 29.2347  | 34.32672 |
| 17295136 | Iqgap2       | IQ motif containing GTPase activating protein 2                | 681.7836 | 696.8962 | 702.3956 | 669.1798 | 676.2299 | 700.0625 |
| 17398929 | Iqgap3       | IQ motif containing GTPase activating protein 3                | 4.910024 | 5.554742 | 5.545625 | 4.796127 | 5.09902  | 4.82166  |
| 17528084 | Iqch         | IQ motif containing H                                          | 5.338965 | 5.315885 | 5.120306 | 5.421455 | 4.875466 | 5.120306 |
| 17482218 | Iqck         | IQ motif containing K                                          | 10.28229 | 9.182646 | 7.134637 | 8.419007 | 9.276046 | 8.419007 |
| 17225391 | Iqca         | IQ motif containing with AAA domain                            | 5.437864 | 5.396822 | 6.477917 | 7.458006 | 6.093495 | 6.347815 |
| 17517424 | Ireb2        | iron responsive element binding protein 2                      | 102.38   | 102.0597 | 86.67175 | 96.39992 | 93.94927 | 106.5761 |
| 17488515 | Pap1         | iron/zinc purple acid phosphatase-like                         | 3.926054 | 4.016949 | 3.750726 | 4.040545 | 3.852407 | 4.335385 |
| 17293273 | Iscal        | iron-sulfur cluster assembly 1 homolog (S. cerevisiae)         | 79.02734 | 88.46899 | 87.543   | 91.0748  | 103.0564 | 99.2235  |
| 17277294 | Iscal2       | iron-sulfur cluster assembly 2 homolog (S. cerevisiae)         | 41.16054 | 48.52075 | 49.51281 | 50.64402 | 47.65944 | 48.15788 |
| 17503800 | Irx3os       | iroquois homeobox 3, opposite strand                           | 7.095429 | 7.492307 | 9.770484 | 8.51685  | 9.786412 | 9.717532 |
| 17294215 | Irx1         | Iroquois related homeobox 1 (Drosophila)                       | 11.77324 | 15.11564 | 12.73776 | 17.2362  | 13.58742 | 13.81564 |
| 17288442 | Irx2         | Iroquois related homeobox 2 (Drosophila)                       | 10.4505  | 12.35592 | 12.86242 | 13.26442 | 8.662419 | 11.69768 |
| 17511623 | Irx3         | Iroquois related homeobox 3                                    | 8.480974 | 7.501141 | 6.892035 | 7.501141 | 7.068725 | 7.70679  |
| 17288454 | Irx4         | Iroquois related homeobox 4 (Drosophila)                       | 6.664238 | 5.4656   | 5.451072 | 3.918414 | 5.803004 | 6.231632 |
| 17503810 | Irx5         | Iroquois related homeobox 5 (Drosophila)                       | 8.297979 | 9.815352 | 8.288379 | 11.4234  | 11.43703 | 11.0861  |
| 17503816 | Irx6         | Iroquois related homeobox 6 (Drosophila)                       | 5.798059 | 6.727638 | 8.20083  | 7.705775 | 6.479668 | 6.82666  |
| 17440757 | Iscu         | IscU iron-sulfur cluster scaffold homolog (E. coli)            | 78.27122 | 81.15792 | 65.2131  | 74.15387 | 74.42988 | 75.35389 |
| 17434023 | Isg15        | ISG15 ubiquitin-like modifier                                  | 28.98953 | 27.08984 | 30.93826 | 41.423   | 31.14309 | 39.63986 |
| 17296427 | Isl1         | ISL1 transcription factor, LIM/homeodomain                     | 5.442879 | 6.288866 | 5.376324 | 5.690203 | 5.376324 | 5.376324 |
| 17464102 | Iapp         | islet amyloid polypeptide                                      | 2.569878 | 2.426236 | 2.621968 | 2.663162 | 2.663162 | 3.079658 |
| 17464803 | Ical         | islet cell autoantigen 1                                       | 7.778921 | 6.660405 | 5.617429 | 6.471768 | 7.343766 | 6.91141  |
| 17223581 | Ical1        | islet cell autoantigen 1-like                                  | 4.389176 | 5.03866  | 4.313802 | 4.790446 | 5.541744 | 4.858295 |
| 17274471 | Iah1         | isoamyl acetate-hydrolyzing esterase 1 homolog (S. cerevisiae) | 138.5401 | 150.4176 | 146.1818 | 148.9165 | 165.6621 | 160.677  |
| 17350869 | Isoc1        | isochorismatase domain containing 1                            | 171.9363 | 162.2877 | 134.4867 | 136.8603 | 146.4465 | 162.3541 |
| 17473402 | Isoc2a       | isochorismatase domain containing 2a                           | 73.78369 | 66.03459 | 78.69445 | 73.79647 | 83.52001 | 92.78824 |
| 17485952 | Isoc2b       | isochorismatase domain containing 2b                           | 6.208264 | 7.32526  | 7.583848 | 10.28579 | 6.79084  | 8.854311 |
| 17223863 | Idh1         | isocitrate dehydrogenase 1 (NADP+), soluble                    | 701.9965 | 626.4085 | 559.068  | 562.0443 | 554.2335 | 562.3599 |
| 17492478 | Idh2         | isocitrate dehydrogenase 2 (NADP+), mitochondrial              | 280.2013 | 316.4887 | 349.3332 | 280.6484 | 221.4259 | 273.6902 |
| 17517390 | Idh3a        | isocitrate dehydrogenase 3 (NAD+) alpha                        | 57.2955  | 55.82077 | 68.72771 | 75.86802 | 56.14673 | 69.676   |
| 17391608 | Idh3b        | isocitrate dehydrogenase 3 (NAD+) beta                         | 493.8024 | 500.1025 | 433.1551 | 440.3357 | 377.9758 | 414.8857 |
| 17542392 | Idh3g        | isocitrate dehydrogenase 3 (NAD+), gamma                       | 256.0266 | 278.9263 | 305.8732 | 289.2073 | 254.2546 | 306.7607 |
| 17287206 | Iars         | isoleucine-tRNA synthetase                                     | 162.7812 | 113.2063 | 108.3353 | 104.1161 | 107.5289 | 95.89675 |
| 17230780 | Iars2        | isoleucine-tRNA synthetase 2, mitochondrial                    | 70.28817 | 72.16113 | 62.88482 | 65.35157 | 62.73332 | 64.45588 |
| 17285056 | Idi1         | isopentenyl-diphosphate delta isomerase                        | 102.336  | 89.02138 | 95.40216 | 107.8947 | 103.4242 | 76.47202 |
| 17285067 | Idi2         | isopentenyl-diphosphate delta isomerase 2                      | 5.162787 | 3.633702 | 4.488147 | 4.87959  | 5.323555 | 8.912005 |
| 17290388 | LOC102642243 | isopentenyl-diphosphate delta-isomerase 2-like                 | 5.259698 | 9.349505 | 9.084203 | 6.256301 | 7.369006 | 6.769503 |
| 17275047 | Ispd         | isoprenoid synthase domain containing                          | 4.47811  | 4.47811  | 4.990969 | 4.565396 | 4.296971 | 4.579119 |
| 17280790 | Ispd         | isoprenoid synthase domain containing                          | 3.161151 | 3.081814 | 2.989968 | 3.081814 | 3.081814 | 3.339703 |
| 17422148 | Icmt         | isoprenylcysteine carboxyl methyltransferase                   | 37.86755 | 36.37108 | 38.42251 | 36.73695 | 34.35933 | 36.29452 |
| 17374648 | Ivd          | isovaleryl coenzyme A dehydrogenase                            | 135.4719 | 126.9371 | 113.6395 | 127.9157 | 100.3683 | 130.9117 |
| 17376908 | Ism1         | isthmin 1 homolog (zebrafish)                                  | 11.69768 | 13.70034 | 11.69768 | 11.28027 | 11.43084 | 12.91638 |
| 17282858 | Ism2         | isthmin 2 homolog (zebrafish)                                  | 10.2448  | 9.841171 | 9.375138 | 10.0348  | 11.23159 | 9.331571 |
| 17468678 | Isy1         | ISY1 splicing factor homolog (S. cerevisiae)                   | 31.44001 | 34.49918 | 34.57986 | 31.33493 | 35.24777 | 31.38493 |
| 17378300 | Itch         | itchy, E3 ubiquitin protein ligase                             | 79.55992 | 92.7233  | 89.15291 | 113.0635 | 108.0893 | 110.7567 |
| 17349223 | Iws1         | IWS1 homolog (S. cerevisiae)                                   | 48.2946  | 48.92127 | 48.2511  | 50.67    | 49.11222 | 48.56651 |
| 17477532 | Izumo2       | IZUMO family member 2                                          | 4.87256  | 3.553942 | 3.598137 | 4.39295  | 4.383855 | 5.239249 |
| 17427188 | Izumo3       | IZUMO family member 3                                          | 2.233258 | 2.677655 | 2.469382 | 3.514233 | 3.396644 | 2.693365 |
| 17235399 | Izumo4       | IZUMO family member 4                                          | 8.388774 | 8.911819 | 8.211239 | 6.723628 | 13.35418 | 12.28529 |
| 17477918 | Izumo1       | izumo sperm-egg fusion 1                                       | 4.326799 | 4.61471  | 4.768945 | 4.385192 | 4.858328 | 4.61471  |
| 17524092 | Izumo1r      | IZUMO1 receptor, JUNO                                          | 7.608542 | 9.660046 | 8.211752 | 8.467112 | 7.410855 | 8.467112 |
| 17397344 | Jade1        | jade family PHD finger 1                                       | 62.14257 | 55.1726  | 55.03395 | 43.91738 | 45.22692 | 63.08609 |
| 17262551 | Jade2        | jade family PHD finger 2                                       | 19.42873 | 25.89443 | 25.3946  | 26.24117 | 28.58963 | 31.1636  |
| 17533553 | Jade3        | jade family PHD finger 3                                       | 24.89148 | 26.23371 | 26.6383  | 20.37969 | 21.51394 | 27.90845 |
| 17392151 | Jag1         | jagged 1                                                       | 13.61514 | 8.280857 | 11.27128 | 8.713969 | 9.126742 | 7.793006 |
| 17284253 | Jag2         | jagged 2                                                       | 10.27011 | 10.70327 | 7.698994 | 7.789334 | 9.390357 | 11.01006 |
| 17461677 | Jagn1        | jagunal homolog 1 (Drosophila)                                 | 39.34041 | 35.71059 | 30.79235 | 34.92093 | 39.85918 | 25.36505 |
| 17427585 | Jak1         | Janus kinase 1                                                 | 212.4133 | 214.7613 | 223.9123 | 204.1478 | 181.9288 | 171.7088 |
| 17358517 | Jak2         | Janus kinase 2                                                 | 55.91022 | 49.92221 | 51.48499 | 54.18794 | 40.78594 | 60.81478 |
| 17502295 | Jak3         | Janus kinase 3                                                 | 27.00678 | 32.58373 | 37.48444 | 28.66563 | 27.51411 | 25.33957 |
| 17436957 | Jakmip1      | janus kinase and microtubule interacting protein 1             | 9.930319 | 10.65885 | 10.73001 | 11.287   | 9.930319 | 10.90706 |
| 17354132 | Jakmip2      | janus kinase and microtubule interacting protein 2             | 4.004577 | 4.705213 | 4.740963 | 5.244554 | 4.428629 | 5.585707 |
| 17484309 | Jakmip3      | janus kinase and microtubule interacting protein 3             | 5.120306 | 4.879353 | 4.716217 | 5.241283 | 5.653091 | 5.218409 |
| 17466921 | Jazf1        | JAZF zinc finger 1                                             | 9.387689 | 10.47436 | 10.41665 | 9.768317 | 8.920163 | 11.31332 |
| 17317989 | Jrk          | jerky                                                          | 5.050933 | 5.714115 | 7.111284 | 5.714115 | 5.747203 | 4.544117 |
| 17276182 | Jkamp        | JNK1/MAPK8-associated membrane protein                         | 67.8224  | 67.10043 | 61.89453 | 67.43894 | 63.84094 | 65.14353 |
| 17319289 | Josd1        | Josephin domain containing 1                                   | 75.86644 | 68.62203 | 72.28678 | 75.72039 | 65.17244 | 69.85638 |
| 17477486 | Josd2        | Josephin domain containing 2                                   | 32.22593 | 38.96481 | 53.43637 | 39.65195 | 34.87352 | 47.23126 |
| 17536984 | Jpx          | Jpx transcript, Xist activator (non-protein coding)            | 4.597469 | 5.562602 | 7.445042 | 6.761953 | 6.849934 | 5.583324 |
| 17523990 | Jrkl         | Jrk-like                                                       | 6.944352 | 8.645144 | 11.05671 | 12.44945 | 11.45448 | 12.22964 |
| 17233960 | Jmjd1c       | jumonji domain containing 1C                                   | 71.33014 | 73.64828 | 86.62671 | 73.03216 | 83.40373 | 72.2958  |
| 17250225 | Jmjd4        | jumonji domain containing 4                                    | 19.78411 | 23.21363 | 24.05458 | 22.75135 | 19.56224 | 16.56125 |
| 17272519 | Jmjd6        | jumonji domain containing 6                                    | 38.06228 | 41.55067 | 36.01385 | 35.67744 | 38.7789  | 33.6373  |

|          |           |                                                                           |          |          |           |          |          |          |
|----------|-----------|---------------------------------------------------------------------------|----------|----------|-----------|----------|----------|----------|
| 17374972 | Jmjd7     | jumonji domain containing 7                                               | 14.1825  | 15.33493 | 13.57011  | 17.74032 | 17.26011 | 13.98414 |
| 17334803 | Jmjd8     | jumonji domain containing 8                                               | 145.0061 | 125.5397 | 118.7711  | 118.0636 | 110.2687 | 117.5948 |
| 17286927 | Jarid2    | jumonji, AT rich interactive domain 2                                     | 20.72026 | 20.23513 | 19.49578  | 19.19834 | 18.01979 | 13.60646 |
| 17399663 | Jtb       | jumping translocation breakpoint                                          | 121.1508 | 111.7127 | 94.454    | 110.013  | 112.7317 | 108.7506 |
| 17511259 | Junb      | jun B proto-oncogene                                                      | 39.56108 | 45.35847 | 49.45176  | 53.75697 | 57.58376 | 58.32652 |
| 17502001 | Jund      | jun D proto-oncogene                                                      | 105.6091 | 106.4565 | 106.2309  | 99.36735 | 114.4719 | 97.80796 |
| 17277396 | Jdp2      | Jun dimerization protein 2                                                | 12.94103 | 12.27576 | 13.04993  | 11.90561 | 12.7519  | 10.5159  |
| 17427312 | Jun       | jun proto-oncogene                                                        | 127.3813 | 125.4553 | 171.32718 | 42.79677 | 43.36593 | 34.34623 |
| 17415502 | Junos     | jun proto-oncogene, opposite strand                                       | 9.115362 | 9.460458 | 8.365084  | 8.712399 | 6.907674 | 9.688276 |
| 17326801 | Jam2      | junction adhesion molecule 2                                              | 49.28955 | 34.53171 | 44.32442  | 43.66635 | 24.4664  | 22.81483 |
| 17525186 | Jam3      | junction adhesion molecule 3                                              | 3.18294  | 3.778857 | 3.382641  | 3.533162 | 3.09335  | 3.31537  |
| 17269464 | Jup       | junction plakoglobin                                                      | 73.4683  | 66.34381 | 91.85141  | 73.1568  | 72.01073 | 65.48851 |
| 17243102 | Jsrp1     | junctional sarcoplasmic reticulum protein 1                               | 21.85452 | 19.17228 | 15.11449  | 18.45411 | 16.98571 | 13.12531 |
| 17294991 | Jmy       | junction-mediating and regulatory protein                                 | 68.39268 | 68.28326 | 61.43505  | 71.92992 | 62.47556 | 83.42975 |
| 17221502 | Jph1      | junctophilin 1                                                            | 8.082379 | 8.751498 | 8.178918  | 8.558393 | 7.866381 | 8.433433 |
| 17394015 | Jph2      | junctophilin 2                                                            | 4.379967 | 3.735859 | 4.454952  | 4.519083 | 3.98887  | 4.129136 |
| 17506313 | Jph3      | junctophilin 3                                                            | 3.653122 | 5.171239 | 5.469959  | 4.364602 | 5.408918 | 4.092493 |
| 17306666 | Jph4      | junctophilin 4                                                            | 14.02521 | 16.89097 | 14.31296  | 12.42669 | 16.47858 | 15.73047 |
| 17269615 | Kat2a     | K(lysine) acetyltransferase 2A                                            | 33.2481  | 33.38435 | 33.2481   | 34.18686 | 34.48411 | 31.03276 |
| 17338571 | Kat2b     | K(lysine) acetyltransferase 2B                                            | 113.7932 | 99.75588 | 80.31124  | 101.2045 | 110.9688 | 109.7517 |
| 17361663 | Kat5      | K(lysine) acetyltransferase 5                                             | 26.22753 | 27.91522 | 29.47316  | 32.70026 | 30.5394  | 28.29745 |
| 17499983 | Kat6a     | K(lysine) acetyltransferase 6A                                            | 31.49673 | 34.96113 | 34.29889  | 34.29889 | 34.29889 | 34.29889 |
| 17297595 | Kat6b     | K(lysine) acetyltransferase 6B                                            | 26.56325 | 27.92877 | 23.62791  | 24.40729 | 26.42222 | 21.1615  |
| 17268180 | Kat7      | K(lysine) acetyltransferase 7                                             | 44.69495 | 44.56441 | 41.60053  | 43.46734 | 42.82377 | 43.00761 |
| 17483532 | Kat8      | K(lysine) acetyltransferase 8                                             | 111.0226 | 71.11638 | 59.09442  | 73.52485 | 86.92745 | 72.77142 |
| 17394102 | Kcns1     | K+ voltage-gated channel, subfamily S, 1                                  | 4.01461  | 3.844751 | 3.844751  | 4.567073 | 4.854491 | 4.330849 |
| 17310977 | Kcns2     | K+ voltage-gated channel, subfamily S, 2                                  | 14.74987 | 14.50029 | 10.93742  | 15.83396 | 15.18705 | 20.16624 |
| 17329946 | Kalrn     | kalirin, RhoGEF kinase                                                    | 10.83983 | 11.80929 | 13.11104  | 11.89984 | 12.43927 | 12.43927 |
| 17477391 | Klk1      | kallikrein 1                                                              | 2.999288 | 1.972465 | 1.893611  | 2.450897 | 3.493807 | 2.496886 |
| 17477377 | Klk1b4    | kallikrein 1-related peptidase b4                                         | 13.65446 | 5.306277 | 6.870809  | 11.50086 | 5.120306 | 7.698994 |
| 17477299 | Klk1b1    | kallikrein 1-related peptidase b1                                         | 2.146729 | 2.587197 | 3.009972  | 2.933474 | 3.83828  | 2.317421 |
| 17477314 | Klk1b11   | kallikrein 1-related peptidase b11                                        | 5.912589 | 9.800939 | 13.18074  | 22.73873 | 11.444   | 14.37958 |
| 17477354 | Klk1b16   | kallikrein 1-related peptidase b16                                        | 2.632384 | 3.609978 | 2.963126  | 3.469842 | 5.252485 | 3.7169   |
| 17477339 | Klk1b21   | kallikrein 1-related peptidase b21                                        | 4.857722 | 3.185081 | 2.743828  | 3.227305 | 2.816239 | 3.088187 |
| 17477347 | Klk1b22   | kallikrein 1-related peptidase b22                                        | 4.322482 | 4.334243 | 5.020984  | 3.283695 | 4.681367 | 3.810948 |
| 17477362 | Klk1b24   | kallikrein 1-related peptidase b24                                        | 6.617379 | 9.457049 | 17.69684  | 8.694602 | 19.62866 | 9.98014  |
| 17477331 | Klk1b27   | kallikrein 1-related peptidase b27                                        | 3.506496 | 2.722326 | 2.687733  | 2.842795 | 2.31988  | 2.421062 |
| 17477369 | Klk1b3    | kallikrein 1-related peptidase b3                                         | 4.505509 | 4.315806 | 4.295631  | 4.445298 | 3.940258 | 3.480996 |
| 17477384 | Klk1b5    | kallikrein 1-related peptidase b5                                         | 5.696793 | 6.881199 | 6.992896  | 7.727973 | 5.813714 | 6.992896 |
| 17477288 | Klk1b7-ps | kallikrein 1-related peptidase b7, pseudogene                             | 4.670089 | 6.12963  | 4.801649  | 4.801649 | 4.390971 | 4.277536 |
| 17477292 | Klk1b8    | kallikrein 1-related peptidase b8                                         | 2.995631 | 2.149781 | 2.419686  | 2.258132 | 3.274194 | 2.789661 |
| 17477306 | Klk1b9    | kallikrein 1-related peptidase b9                                         | 2.562496 | 2.872785 | 2.91212   | 3.067046 | 3.206368 | 2.820146 |
| 17477322 | Klk1b26   | kallikrein 1-related peptidase b26                                        | 7.987256 | 8.480386 | 7.057856  | 7.431019 | 6.297067 | 7.579959 |
| 17509052 | Klkb1     | kallikrein B, plasma 1                                                    | 435.0116 | 336.8868 | 242.2999  | 347.3726 | 410.7225 | 407.4756 |
| 17477220 | Klk10     | kallikrein related-peptidase 10                                           | 5.650662 | 7.500101 | 7.418976  | 6.164697 | 6.970151 | 6.347375 |
| 17477209 | Klk11     | kallikrein related-peptidase 11                                           | 3.341463 | 3.757909 | 3.524039  | 3.381258 | 2.959739 | 3.381258 |
| 17477199 | Klk12     | kallikrein related-peptidase 12                                           | 9.52065  | 8.601093 | 10.1025   | 13.59458 | 11.31622 | 10.49333 |
| 17477191 | Klk13     | kallikrein related-peptidase 13                                           | 7.486596 | 5.669769 | 5.669769  | 5.364337 | 5.669769 | 5.27156  |
| 17477184 | Klk14     | kallikrein related-peptidase 14                                           | 5.443256 | 4.153824 | 4.193282  | 5.25824  | 5.29342  | 4.556544 |
| 17477282 | Klk15     | kallikrein related-peptidase 15                                           | 3.403337 | 4.245134 | 4.20927   | 4.10841  | 3.390528 | 4.20927  |
| 17477274 | Klk4      | kallikrein related-peptidase 4 (prostase, enamel matrix, prostate)        | 11.50086 | 11.66828 | 11.85957  | 11.26683 | 8.689541 | 11.86771 |
| 17477266 | Klk5      | kallikrein related-peptidase 5                                            | 5.48933  | 6.196442 | 4.153507  | 6.100807 | 9.531346 | 6.100807 |
| 17477254 | Klk6      | kallikrein related-peptidase 6                                            | 5.52414  | 5.52414  | 5.52414   | 5.52414  | 5.294153 | 4.946198 |
| 17477245 | Klk7      | kallikrein related-peptidase 7 (chymotryptic, stratum corneum)            | 9.488237 | 9.623022 | 9.903442  | 10.0776  | 9.809231 | 9.918005 |
| 17477237 | Klk8      | kallikrein related-peptidase 8                                            | 8.559639 | 7.892597 | 7.060351  | 6.685614 | 7.183167 | 6.497073 |
| 17477229 | Klk9      | kallikrein related-peptidase 9                                            | 7.453355 | 6.267282 | 6.171709  | 6.171709 | 7.379689 | 5.862638 |
| 17541705 | Kis2      | Kaplan integration site 2                                                 | 3.004969 | 3.339703 | 3.339703  | 3.255886 | 3.070748 | 3.339703 |
| 17474052 | Kptn      | kaptin                                                                    | 16.69738 | 12.39443 | 16.85553  | 17.28442 | 16.19021 | 14.54942 |
| 17325291 | Kpna1     | karyopherin (importin) alpha 1                                            | 52.41326 | 46.16348 | 40.37079  | 50.39539 | 41.92474 | 36.95839 |
| 17271033 | Kpna2     | karyopherin (importin) alpha 2                                            | 20.0799  | 22.88944 | 24.73514  | 23.49986 | 22.34407 | 19.40854 |
| 17307472 | Kpna3     | karyopherin (importin) alpha 3                                            | 153.6592 | 119.6976 | 127.3239  | 127.3239 | 117.7155 | 121.547  |
| 17405795 | Kpna4     | karyopherin (importin) alpha 4                                            | 70.39788 | 58.12069 | 51.52462  | 59.98667 | 53.5335  | 56.72725 |
| 17430503 | Kpna6     | karyopherin (importin) alpha 6                                            | 53.8939  | 48.69832 | 50.92704  | 60.84513 | 47.42185 | 56.76776 |
| 17268469 | Kpnb1     | karyopherin (importin) beta 1                                             | 144.4544 | 137.2203 | 147.5602  | 140.405  | 129.6457 | 142.4656 |
| 17547634 | Kpnb1     | karyopherin (importin) beta 1                                             | 193.0245 | 179.7503 | 196.3794  | 186.2272 | 174.2385 | 193.9391 |
| 17455028 | Kpna7     | karyopherin alpha 7 (importin alpha 8)                                    | 3.919175 | 4.20927  | 4.177761  | 4.560747 | 4.637316 | 3.625173 |
| 17270621 | Kansl1    | KAT8 regulatory NSL complex subunit 1                                     | 43.54575 | 40.60344 | 45.02767  | 50.0747  | 41.538   | 38.54522 |
| 17223880 | Kansl1l   | KAT8 regulatory NSL complex subunit 1-like                                | 17.54892 | 19.96208 | 16.44948  | 16.17675 | 19.51593 | 20.03596 |
| 17321227 | Kansl2    | KAT8 regulatory NSL complex subunit 2                                     | 30.59279 | 49.65889 | 52.98309  | 35.70217 | 52.022   | 40.91506 |
| 17479162 | Kansl2-ps | KAT8 regulatory NSL complex subunit 2, pseudogene                         | 27.35381 | 42.35675 | 31.82768  | 29.94888 | 37.0343  | 31.65672 |
| 17222156 | Kansl3    | KAT8 regulatory NSL complex subunit 3                                     | 56.44993 | 66.14224 | 69.02992  | 52.54494 | 58.36696 | 57.71322 |
| 17231558 | Katna1    | katanin p60 (ATPase-containing) subunit A1                                | 36.08932 | 36.42078 | 40.40411  | 37.63101 | 35.89448 | 39.21055 |
| 17507485 | Gm6524    | katanin p60 (ATPase-containing) subunit A1 pseudogene                     | 3.062861 | 2.810253 | 2.560295  | 2.510683 | 2.615705 | 3.498848 |
| 17455431 | Katnal1   | katanin p60 subunit A-like 1                                              | 13.524   | 12.21879 | 15.43678  | 13.524   | 13.524   | 12.84398 |
| 17355483 | Katnal2   | katanin p60 subunit A-like 2                                              | 4.811511 | 4.307289 | 4.394929  | 4.665592 | 4.582993 | 4.941949 |
| 17504242 | Katnb1    | katanin p80 (WD40-containing) subunit B 1                                 | 16.20088 | 18.18126 | 15.53855  | 15.39457 | 15.65357 | 15.07724 |
| 17374283 | Katnb1l   | katanin p80 subunit B like 1                                              | 12.87633 | 9.128324 | 8.33106   | 9.178128 | 6.581425 | 7.613343 |
| 17359816 | Kazald1   | Kazal-type serine peptidase inhibitor domain 1                            | 7.782696 | 6.632211 | 6.355299  | 6.831015 | 7.047981 | 7.049202 |
| 17432397 | Kazn      | kazrin, periaplin interacting protein                                     | 6.699205 | 6.665578 | 7.561277  | 6.8431   | 5.554126 | 6.699205 |
| 17498239 | Kcnq1ot1  | KCNQ1 overlapping transcript 1                                            | 15.82145 | 19.0894  | 16.80408  | 13.94398 | 12.64224 | 11.86138 |
| 17222694 | Kdelc1    | KDEL (Lys-Asp-Glu-Leu) containing 1                                       | 14.87275 | 11.8415  | 12.38953  | 13.6698  | 13.59798 | 15.54501 |
| 17517300 | Kdelc2    | KDEL (Lys-Asp-Glu-Leu) containing 2                                       | 11.57877 | 8.079522 | 10.93825  | 10.81004 | 7.653979 | 10.29855 |
| 17478032 | Kdelr1    | KDEL (Lys-Asp-Glu-Leu) endoplasmic reticulum protein retention receptor 1 | 33.01478 | 33.62145 | 33.99593  | 38.15447 | 39.97566 | 31.25229 |
| 17444338 | Kdelr2    | KDEL (Lys-Asp-Glu-Leu) endoplasmic reticulum protein retention receptor 2 | 230.653  | 159.2335 | 168.6315  | 140.9295 | 180.4518 | 150.0355 |

|          |         |                                                                                 |          |          |          |          |          |          |
|----------|---------|---------------------------------------------------------------------------------|----------|----------|----------|----------|----------|----------|
| 17313000 | Kdelr3  | KDEL (Lys-Asp-Glu-Leu) endoplasmic reticulum protein retention receptor 3       | 5.885276 | 6.592611 | 6.287864 | 6.594485 | 5.799868 | 6.287864 |
| 17264651 | Kdm6b   | KDM1 lysine (K)-specific demethylase 6B                                         | 41.01643 | 65.10967 | 58.08002 | 54.18344 | 38.50543 | 50.54582 |
| 17251653 | Kdm6bos | KDM1 lysine (K)-specific demethylase 6B, opposite strand [Source:MGI Symbol;Acc | 8.058381 | 5.52326  | 6.029967 | 4.369627 | 5.554319 | 6.503336 |
| 17349474 | Kdm3b   | KDM3B lysine (K)-specific demethylase 3B                                        | 75.66845 | 79.06076 | 78.69445 | 70.74518 | 78.69445 | 78.69445 |
| 17545430 | Kantr   | Kdm5c adjacent non-coding transcript                                            | 3.623264 | 3.227663 | 3.599309 | 3.930928 | 3.391116 | 3.89062  |
| 17275890 | Klhdc1  | kelch domain containing 1                                                       | 3.643967 | 3.322364 | 3.735755 | 3.735833 | 3.322364 | 3.829378 |
| 17456841 | Klhdc10 | kelch domain containing 10                                                      | 63.66109 | 63.3736  | 60.96249 | 62.76116 | 48.71148 | 55.5733  |
| 17275909 | Klhdc2  | kelch domain containing 2                                                       | 96.01714 | 98.94535 | 86.64472 | 98.86925 | 98.94535 | 98.51353 |
| 17345527 | Klhdc3  | kelch domain containing 3                                                       | 131.1433 | 140.5685 | 159.8672 | 138.0292 | 114.5648 | 113.0024 |
| 17513625 | Klhdc4  | kelch domain containing 4                                                       | 15.77152 | 14.38228 | 17.16526 | 17.38523 | 16.54427 | 17.16526 |
| 17431933 | Klhdc7a | kelch domain containing 7A                                                      | 10.56368 | 10.96345 | 12.89035 | 12.2579  | 12.65679 | 13.63195 |
| 17314157 | Klhdc7b | kelch domain containing 7B                                                      | 12.53144 | 11.22964 | 14.46496 | 15.18074 | 9.988306 | 12.81099 |
| 17217174 | Klhdc8a | kelch domain containing 8A                                                      | 8.208849 | 8.556436 | 8.615652 | 9.534584 | 13.37095 | 8.494035 |
| 17531193 | Klhdc8b | kelch domain containing 8B                                                      | 11.61542 | 12.58986 | 12.69053 | 13.12568 | 10.85133 | 14.98129 |
| 17229742 | Klhdc9  | kelch domain containing 9                                                       | 8.077618 | 9.438189 | 9.427792 | 10.38522 | 8.963362 | 10.09697 |
| 17499480 | Kbtbd11 | kelch repeat and BTB (POZ) domain containing 11                                 | 9.895688 | 9.50746  | 8.987999 | 10.17178 | 9.987752 | 12.53743 |
| 17468747 | Kbtbd12 | kelch repeat and BTB (POZ) domain containing 12                                 | 4.01461  | 3.987792 | 3.455298 | 5.217866 | 6.366454 | 5.148849 |
| 17528247 | Kbtbd13 | kelch repeat and BTB (POZ) domain containing 13                                 | 5.275874 | 4.836287 | 4.697587 | 5.17192  | 4.868475 | 4.402735 |
| 17467115 | Kbtbd2  | kelch repeat and BTB (POZ) domain containing 2                                  | 19.42873 | 18.16815 | 18.01392 | 18.05504 | 18.01392 | 17.38812 |
| 17514410 | Kbtbd3  | kelch repeat and BTB (POZ) domain containing 3                                  | 3.787485 | 4.20927  | 3.787485 | 3.979646 | 4.352065 | 3.371873 |
| 17373110 | Kbtbd4  | kelch repeat and BTB (POZ) domain containing 4                                  | 15.90612 | 15.43764 | 15.09417 | 16.18258 | 14.31296 | 15.5858  |
| 17302234 | Kbtbd6  | kelch repeat and BTB (POZ) domain containing 6                                  | 3.51416  | 3.412171 | 3.773622 | 3.722986 | 2.691126 | 3.898286 |
| 17302226 | Kbtbd7  | kelch repeat and BTB (POZ) domain containing 7                                  | 46.78324 | 31.84202 | 39.8589  | 39.62777 | 34.12791 | 38.24131 |
| 17461103 | Kbtbd8  | kelch repeat and BTB (POZ) domain containing 8                                  | 4.822362 | 4.769969 | 4.949696 | 5.022028 | 5.031575 | 4.826509 |
| 17309024 | Klhl1   | kelch-like 1                                                                    | 4.12333  | 5.965405 | 3.795211 | 4.386773 | 4.078476 | 4.626977 |
| 17256378 | Klhl10  | kelch-like 10                                                                   | 4.426848 | 4.814013 | 4.418633 | 5.368094 | 5.642013 | 5.289898 |
| 17269516 | Klhl11  | kelch-like 11                                                                   | 13.73933 | 13.8586  | 17.58922 | 17.65604 | 19.32478 | 16.5771  |
| 17217469 | Klhl12  | kelch-like 12                                                                   | 15.528   | 14.95038 | 12.73573 | 16.05087 | 13.55159 | 14.33858 |
| 17540589 | Klhl13  | kelch-like 13                                                                   | 7.461729 | 7.294353 | 6.374755 | 6.946903 | 6.330634 | 7.092627 |
| 17353042 | Klhl14  | kelch-like 14                                                                   | 4.135839 | 4.763493 | 3.963321 | 3.962992 | 4.838299 | 4.502574 |
| 17536295 | Klhl15  | kelch-like 15                                                                   | 15.18737 | 12.92901 | 11.55592 | 12.22549 | 11.84774 | 14.78457 |
| 17434046 | Klhl17  | kelch-like 17                                                                   | 17.92175 | 19.08477 | 19.49537 | 19.36675 | 16.12257 | 19.42496 |
| 17531563 | Klhl18  | kelch-like 18                                                                   | 16.33314 | 16.13409 | 15.60828 | 17.53104 | 14.71535 | 15.5992  |
| 17509642 | Klhl2   | kelch-like 2, Mayven                                                            | 52.10789 | 49.0469  | 55.87651 | 55.74614 | 57.12142 | 61.39163 |
| 17228825 | Klhl20  | kelch-like 20                                                                   | 33.11631 | 30.76419 | 30.22771 | 29.2566  | 30.22771 | 28.27078 |
| 17422039 | Klhl21  | kelch-like 21                                                                   | 47.19853 | 50.35419 | 48.63962 | 49.55814 | 49.30049 | 60.96672 |
| 17323589 | Klhl22  | kelch-like 22                                                                   | 10.23401 | 18.11484 | 14.49175 | 20.28357 | 18.90977 | 16.29808 |
| 17371495 | Klhl23  | kelch-like 23                                                                   | 4.409393 | 5.338965 | 5.338965 | 5.275069 | 5.628693 | 5.896791 |
| 17323838 | Klhl24  | kelch-like 24                                                                   | 139.8096 | 186.2207 | 167.3413 | 182.0499 | 165.731  | 209.9672 |
| 17479254 | Klhl25  | kelch-like 25                                                                   | 18.97174 | 17.14053 | 17.23776 | 17.12414 | 17.23776 | 16.70062 |
| 17510057 | Klhl26  | kelch-like 26                                                                   | 20.22363 | 17.17538 | 19.31005 | 15.11113 | 17.08076 | 16.30237 |
| 17281412 | Klhl28  | kelch-like 28                                                                   | 14.15696 | 15.20485 | 13.73362 | 13.39423 | 11.12929 | 12.92157 |
| 17279893 | Klhl29  | kelch-like 29                                                                   | 6.535964 | 8.815974 | 8.405887 | 7.453355 | 8.143675 | 8.007045 |
| 17293059 | Klhl3   | kelch-like 3                                                                    | 15.70814 | 19.14638 | 19.92793 | 15.14353 | 18.49649 | 22.4176  |
| 17215750 | Klhl30  | kelch-like 30                                                                   | 4.570906 | 6.049433 | 4.826141 | 5.733317 | 5.749036 | 6.092904 |
| 17519573 | Klhl31  | kelch-like 31                                                                   | 7.12031  | 7.474878 | 7.829825 | 6.549751 | 7.066912 | 5.765757 |
| 17423640 | Klhl32  | kelch-like 32                                                                   | 3.787485 | 3.808466 | 3.738786 | 3.787485 | 3.733866 | 3.787485 |
| 17306045 | Klhl33  | kelch-like 33                                                                   | 4.454335 | 4.051679 | 3.48667  | 4.455941 | 3.838387 | 4.068283 |
| 17539121 | Klhl34  | kelch-like 34                                                                   | 8.060727 | 9.246517 | 10.10068 | 10.17206 | 9.520716 | 8.807606 |
| 17480555 | Klhl35  | kelch-like 35                                                                   | 4.667273 | 5.17669  | 5.363371 | 4.922086 | 3.78444  | 6.347815 |
| 17506177 | Klhl36  | kelch-like 36                                                                   | 12.51868 | 14.41081 | 22.6665  | 16.72321 | 16.20312 | 14.37958 |
| 17317278 | Klhl38  | kelch-like 38                                                                   | 4.267526 | 4.006521 | 3.50956  | 4.513135 | 3.688489 | 3.664738 |
| 17537306 | Klhl4   | kelch-like 4                                                                    | 4.01461  | 3.889272 | 4.687699 | 4.218441 | 4.243133 | 4.281748 |
| 17523359 | Klhl40  | kelch-like 40                                                                   | 5.979356 | 6.131712 | 5.460943 | 5.795246 | 6.030928 | 5.82933  |
| 17371451 | Klhl41  | kelch-like 41                                                                   | 6.100933 | 5.496373 | 5.965198 | 6.100933 | 6.564886 | 7.387263 |
| 17464417 | Klhl42  | kelch-like 42                                                                   | 39.06623 | 33.49746 | 30.12481 | 36.16369 | 37.73026 | 35.50229 |
| 17437704 | Klhl5   | kelch-like 5                                                                    | 24.86906 | 22.77722 | 22.25673 | 29.18813 | 20.38053 | 24.92774 |
| 17329063 | Klhl6   | kelch-like 6                                                                    | 10.49369 | 9.362994 | 12.19189 | 10.41665 | 10.2773  | 8.179768 |
| 17435251 | Klhl7   | kelch-like 7                                                                    | 28.37778 | 25.48948 | 30.68752 | 28.13356 | 22.81673 | 30.73264 |
| 17450338 | Klhl8   | kelch-like 8                                                                    | 5.179777 | 6.242267 | 5.428863 | 7.748355 | 6.717386 | 5.854719 |
| 17427108 | Klhl9   | kelch-like 9                                                                    | 61.6945  | 59.47164 | 56.01417 | 59.30287 | 70.93865 | 69.27534 |
| 17524659 | Keap1   | kelch-like ECH-associated protein 1                                             | 60.56112 | 53.56096 | 61.73728 | 57.43825 | 64.86508 | 57.05811 |
| 17466360 | Kel     | Kell blood group                                                                | 2.778007 | 3.264699 | 3.009972 | 3.125615 | 2.544143 | 3.452353 |
| 17544446 | Xkxr    | Kell blood group complex subunit-related, X-linked                              | 3.580051 | 3.532917 | 3.753665 | 3.32808  | 3.826724 | 3.674098 |
| 17533207 | Xk      | Kell blood group precursor (McLeod phenotype) homolog                           | 23.79093 | 16.70954 | 14.16079 | 14.80066 | 17.29412 | 11.00594 |
| 17322039 | Krt1    | keratin 1                                                                       | 3.569198 | 4.325269 | 4.342994 | 4.589573 | 3.185964 | 4.216716 |
| 17269064 | Krt10   | keratin 10                                                                      | 8.70932  | 11.94156 | 9.685255 | 10.7929  | 11.96004 | 12.73229 |
| 17269074 | Krt12   | keratin 12                                                                      | 6.347815 | 5.017504 | 6.992896 | 7.259851 | 6.347815 | 5.566382 |
| 17269347 | Krt13   | keratin 13                                                                      | 6.222395 | 5.928224 | 7.59658  | 7.336948 | 5.966893 | 9.214462 |
| 17269391 | Krt14   | keratin 14                                                                      | 5.092909 | 3.711237 | 4.697815 | 4.886055 | 6.22576  | 4.996196 |
| 17269358 | Krt15   | keratin 15                                                                      | 4.634552 | 4.932879 | 4.074802 | 3.954677 | 5.026485 | 4.458659 |
| 17269404 | Krt16   | keratin 16                                                                      | 4.368809 | 4.933974 | 4.557397 | 4.241869 | 3.810129 | 4.20927  |
| 17269415 | Krt17   | keratin 17                                                                      | 6.648459 | 4.900402 | 7.526765 | 5.185884 | 4.982742 | 6.367601 |
| 17315245 | Krt18   | keratin 18                                                                      | 348.7308 | 311.8871 | 324.7487 | 307.9986 | 321.7553 | 300.5039 |
| 17269368 | Krt19   | keratin 19                                                                      | 5.15467  | 5.647373 | 5.44386  | 5.458596 | 5.153741 | 5.896423 |
| 17322026 | Krt2    | keratin 2                                                                       | 6.171709 | 5.669258 | 6.655237 | 6.072035 | 5.147386 | 5.129364 |
| 17269085 | Krt20   | keratin 20                                                                      | 5.618286 | 5.300432 | 5.633221 | 6.366233 | 5.603818 | 6.191247 |
| 17268995 | Krt222  | keratin 222                                                                     | 4.789848 | 3.339703 | 3.341625 | 3.87356  | 4.352065 | 3.919936 |
| 17269096 | Krt23   | keratin 23                                                                      | 25.80091 | 31.01254 | 42.19207 | 48.02588 | 9.17304  | 64.599   |
| 17269006 | Krt24   | keratin 24                                                                      | 4.480159 | 5.29944  | 5.468215 | 4.698955 | 6.034691 | 4.551241 |
| 17269018 | Krt25   | keratin 25                                                                      | 3.036228 | 3.973334 | 3.703322 | 3.420933 | 4.015668 | 3.538848 |
| 17269030 | Krt26   | keratin 26                                                                      | 4.652093 | 3.067918 | 2.980863 | 3.067918 | 3.263862 | 3.633299 |
| 17269042 | Krt27   | keratin 27                                                                      | 4.187096 | 4.33803  | 3.941296 | 4.23702  | 7.099808 | 4.243104 |
| 17269052 | Krt28   | keratin 28                                                                      | 4.761546 | 5.206703 | 4.743296 | 6.996532 | 5.338632 | 5.610114 |

|          |            |                                                                      |          |          |          |          |          |          |
|----------|------------|----------------------------------------------------------------------|----------|----------|----------|----------|----------|----------|
| 17269301 | Krt31      | keratin 31                                                           | 4.285668 | 4.86291  | 3.813326 | 2.992394 | 4.576231 | 4.106644 |
| 17269311 | Krt32      | keratin 32                                                           | 7.684546 | 9.177492 | 8.047385 | 6.761344 | 8.048166 | 14.53078 |
| 17269270 | Krt33a     | keratin 33A                                                          | 8.044373 | 8.220066 | 7.07397  | 7.5552   | 7.333643 | 7.978735 |
| 17269281 | Krt33b     | keratin 33B                                                          | 5.097147 | 6.992896 | 6.386608 | 7.139386 | 7.280866 | 9.221299 |
| 17269291 | Krt34      | keratin 34                                                           | 5.291732 | 4.8868   | 6.858533 | 5.938382 | 6.444284 | 5.981967 |
| 17269322 | Krt35      | keratin 35                                                           | 5.479826 | 5.337522 | 5.877123 | 5.208796 | 5.15971  | 5.678186 |
| 17269333 | Krt36      | keratin 36                                                           | 3.129994 | 3.263862 | 4.872864 | 3.440313 | 7.962933 | 4.872864 |
| 17269343 | Krt36      | keratin 36                                                           | 8.196852 | 10.07096 | 9.061564 | 9.061564 | 8.00588  | 9.310251 |
| 17269108 | Krt39      | keratin 39                                                           | 5.211613 | 5.486857 | 4.643717 | 6.350059 | 5.236925 | 5.341297 |
| 17322075 | Krt4       | keratin 4                                                            | 3.708922 | 4.074294 | 4.05387  | 4.17449  | 3.889218 | 3.426772 |
| 17269118 | Krt40      | keratin 40                                                           | 5.814923 | 10.22472 | 6.724794 | 7.878822 | 5.896178 | 8.129463 |
| 17269424 | Krt42      | keratin 42                                                           | 13.44474 | 13.44474 | 12.53708 | 12.57346 | 13.30863 | 15.00499 |
| 17321966 | Krt5       | keratin 5                                                            | 9.226542 | 10.65671 | 8.473453 | 8.573356 | 9.308121 | 8.981522 |
| 17321951 | Krt6a      | keratin 6A                                                           | 3.462322 | 4.702148 | 3.703322 | 4.068621 | 5.635056 | 2.886758 |
| 17321939 | Krt6b      | keratin 6B                                                           | 4.609819 | 3.010932 | 3.339703 | 3.207546 | 4.151003 | 2.803793 |
| 17315200 | Krt7       | keratin 7                                                            | 13.55469 | 16.22211 | 12.1535  | 13.71032 | 20.89926 | 14.89432 |
| 17321978 | Krt71      | keratin 71                                                           | 5.989435 | 5.300432 | 5.124851 | 5.641231 | 5.529695 | 4.790845 |
| 17322002 | Krt72      | keratin 72                                                           | 3.587478 | 3.798237 | 3.6199   | 3.799685 | 3.413945 | 4.144879 |
| 17322014 | Krt73      | keratin 73                                                           | 9.399148 | 10.02771 | 10.41644 | 8.89935  | 7.805765 | 10.09284 |
| 17321989 | Krt74      | keratin 74                                                           | 2.316859 | 3.658241 | 3.809601 | 4.514512 | 2.87161  | 6.185242 |
| 17321907 | Krt75      | keratin 75                                                           | 3.69991  | 4.663167 | 3.744103 | 4.376538 | 4.56796  | 4.607838 |
| 17322063 | Krt76      | keratin 76                                                           | 3.249392 | 3.04905  | 4.385101 | 3.256946 | 4.223122 | 3.877589 |
| 17322051 | Krt77      | keratin 77                                                           | 6.470916 | 7.698994 | 7.488413 | 8.226735 | 6.161835 | 7.393872 |
| 17322099 | Krt78      | keratin 78                                                           | 12.12918 | 16.44161 | 15.94818 | 16.62301 | 12.20694 | 13.39423 |
| 17322087 | Krt79      | keratin 79                                                           | 11.58503 | 11.33844 | 11.57371 | 14.49607 | 10.19366 | 11.02938 |
| 17322113 | Krt8       | keratin 8                                                            | 220.9001 | 250.8185 | 252.2954 | 220.8817 | 231.2116 | 229.2456 |
| 17321823 | Krt80      | keratin 80                                                           | 8.835612 | 7.104386 | 6.760266 | 7.458265 | 7.086533 | 6.394493 |
| 17321849 | Krt81      | keratin 81                                                           | 21.90077 | 23.22119 | 18.95452 | 20.48676 | 21.1615  | 16.13722 |
| 17321883 | Krt82      | keratin 82                                                           | 11.28481 | 13.02598 | 10.7716  | 12.25297 | 10.60358 | 13.90103 |
| 17321838 | Krt83      | keratin 83                                                           | 2.429316 | 2.994469 | 2.335676 | 2.740464 | 3.549978 | 3.339703 |
| 17321871 | Krt84      | keratin 84                                                           | 5.08078  | 4.999903 | 5.09531  | 5.824523 | 5.004688 | 4.771325 |
| 17315225 | Krt86      | keratin 86                                                           | 6.860673 | 14.3203  | 11.25216 | 15.01622 | 9.659175 | 11.51362 |
| 17269381 | Krt9       | keratin 9                                                            | 8.277585 | 5.741668 | 5.793921 | 6.29314  | 5.741668 | 5.608869 |
| 17234736 | Krtap10-10 | keratin associated protein 10-10                                     | 3.915157 | 2.725536 | 2.729904 | 2.940497 | 3.504236 | 2.953325 |
| 17242328 | Krtap10-4  | keratin associated protein 10-4                                      | 6.171709 | 7.082555 | 6.171709 | 6.797527 | 6.171709 | 6.171709 |
| 17331914 | Krtap11-1  | keratin associated protein 11-1                                      | 2.922109 | 3.263862 | 2.722364 | 2.70148  | 2.690417 | 2.922109 |
| 17234713 | Krtap12-1  | keratin associated protein 12-1                                      | 2.810545 | 2.96843  | 2.420978 | 2.643886 | 2.9702   | 3.350183 |
| 17234707 | Gm10272    | keratin associated protein 12-4                                      | 4.943079 | 13.29858 | 11.30665 | 9.45895  | 6.886973 | 7.330898 |
| 17331852 | Krtap13    | keratin associated protein 13                                        | 2.111298 | 2.353846 | 2.439491 | 2.304206 | 2.44191  | 2.287592 |
| 17269146 | Krtap1-3   | keratin associated protein 1-3                                       | 2.956602 | 3.34958  | 2.561751 | 2.398795 | 3.079209 | 2.956602 |
| 17326914 | Krtap13-1  | keratin associated protein 13-1                                      | 4.099335 | 3.430907 | 3.892886 | 3.958709 | 3.36277  | 3.675702 |
| 17331861 | Krtap14    | keratin associated protein 14                                        | 2.933453 | 2.663568 | 2.55845  | 2.431337 | 2.810311 | 2.802258 |
| 17269143 | Krtap1-4   | keratin associated protein 1-4                                       | 3.729055 | 3.710054 | 2.782169 | 3.233059 | 3.807357 | 2.953407 |
| 17326922 | Krtap15    | keratin associated protein 15                                        | 4.090309 | 3.644523 | 3.94545  | 3.644523 | 3.644523 | 3.806144 |
| 17269139 | Krtap1-5   | keratin associated protein 1-5                                       | 4.611672 | 2.807741 | 2.868845 | 2.888599 | 2.75219  | 2.294803 |
| 17269263 | Krtap16-1  | keratin associated protein 16-1                                      | 4.01461  | 4.513855 | 4.349863 | 4.01461  | 4.076525 | 4.01461  |
| 17331886 | Krtap16-3  | keratin associated protein 16-3                                      | 2.285215 | 2.20239  | 2.105116 | 2.4325   | 2.214974 | 2.33021  |
| 17269266 | Krtap17-1  | keratin associated protein 17-1                                      | 25.88672 | 19.5773  | 24.11836 | 17.41115 | 16.45085 | 19.99005 |
| 17331863 | Krtap19-1  | keratin associated protein 19-1                                      | 3.244104 | 2.314611 | 2.406006 | 3.230662 | 2.406006 | 2.532812 |
| 17331866 | Krtap19-2  | keratin associated protein 19-2                                      | 2.620187 | 2.309611 | 3.146853 | 2.336631 | 2.509083 | 2.14664  |
| 17331869 | Krtap19-3  | keratin associated protein 19-3                                      | 2.483543 | 1.861157 | 2.32152  | 3.107749 | 2.197571 | 2.596359 |
| 17331873 | Krtap19-4  | keratin associated protein 19-4                                      | 31.37536 | 33.31592 | 37.02788 | 37.97373 | 38.65411 | 32.794   |
| 17331876 | Krtap19-5  | keratin associated protein 19-5                                      | 3.294752 | 2.592026 | 2.910183 | 2.635488 | 2.448367 | 3.126005 |
| 17331880 | Krtap19-9a | keratin associated protein 19-9A [Source:MGI Symbol;Acc:MGI:3704466] | 2.610941 | 2.34925  | 2.075933 | 2.673556 | 2.072655 | 2.606909 |
| 17331882 | Krtap19-9b | keratin associated protein 19-9B                                     | 3.207013 | 2.369118 | 2.446535 | 2.210174 | 2.800472 | 2.613929 |
| 17326950 | Krtap20-2  | keratin associated protein 20-2                                      | 3.177694 | 3.476462 | 2.67402  | 2.510875 | 3.019877 | 2.760788 |
| 17331900 | Krtap21-1  | keratin associated protein 21-1                                      | 1.989533 | 2.659804 | 2.67402  | 2.606909 | 2.659804 | 2.434862 |
| 17331888 | Krtap22-2  | keratin associated protein 22-2                                      | 3.148512 | 2.463142 | 2.48239  | 2.953407 | 2.906595 | 2.855137 |
| 17269158 | Krtap2-4   | keratin associated protein 2-4                                       | 3.477258 | 2.096816 | 2.253442 | 2.880322 | 2.274391 | 2.307627 |
| 17331832 | Krtap24-1  | keratin associated protein 24-1                                      | 3.492863 | 4.86254  | 4.509977 | 4.190057 | 5.058431 | 4.509977 |
| 17331842 | Krtap26-1  | keratin associated protein 26-1                                      | 3.176328 | 3.863719 | 3.766332 | 3.39735  | 2.988538 | 3.448502 |
| 17331846 | Krtap27-1  | keratin associated protein 27-1                                      | 3.787485 | 3.787485 | 3.881677 | 2.576388 | 4.975874 | 4.065351 |
| 17548922 | Krtap28-13 | keratin associated protein 28-13                                     | 2.018369 | 2.237566 | 2.14545  | 2.134562 | 1.965069 | 2.43304  |
| 17269261 | Krtap29-1  | keratin associated protein 29-1 [Source:MGI Symbol;Acc:MGI:3652056]  | 6.303137 | 6.287864 | 5.246626 | 6.287864 | 7.69526  | 6.745662 |
| 17269136 | Krtap3-1   | keratin associated protein 3-1                                       | 3.794422 | 4.312845 | 3.765601 | 3.382078 | 3.660397 | 4.831195 |
| 17256323 | Krtap31-1  | keratin associated protein 31-1                                      | 6.171709 | 5.780603 | 4.821025 | 4.798821 | 4.522749 | 4.681043 |
| 17256332 | Krtap31-2  | keratin associated protein 31-2                                      | 3.919854 | 2.578604 | 2.949969 | 2.509604 | 3.177716 | 2.850312 |
| 17269130 | Krtap3-2   | keratin associated protein 3-2                                       | 2.762089 | 2.178251 | 2.727653 | 2.325934 | 3.04356  | 2.396751 |
| 17269126 | Krtap3-3   | keratin associated protein 3-3                                       | 3.023333 | 3.460715 | 3.339703 | 3.188527 | 3.308896 | 2.851755 |
| 17269164 | Krtap4-1   | keratin associated protein 4-1                                       | 4.239282 | 2.605319 | 2.93384  | 2.858285 | 3.150214 | 4.350074 |
| 17269246 | Krtap4-13  | keratin associated protein 4-13                                      | 21.58115 | 35.36107 | 34.36124 | 31.25966 | 30.87442 | 28.56111 |
| 17269256 | Krtap4-16  | keratin associated protein 4-16                                      | 7.264281 | 7.507122 | 6.074897 | 7.426384 | 7.748086 | 7.507122 |
| 17269167 | Krtap4-2   | keratin associated protein 4-2                                       | 2.051188 | 2.132565 | 2.150094 | 2.929897 | 2.197617 | 2.002178 |
| 17269184 | Krtap4-6   | keratin associated protein 4-6                                       | 3.379782 | 3.274671 | 2.560277 | 2.734581 | 2.844293 | 2.774754 |
| 17269171 | Krtap4-7   | keratin associated protein 4-7                                       | 2.435892 | 2.443383 | 2.459935 | 2.354564 | 2.454961 | 3.316979 |
| 17269229 | Krtap4-8   | keratin associated protein 4-8                                       | 3.141732 | 2.640443 | 2.236232 | 2.660173 | 2.425076 | 2.22436  |
| 17256292 | Krtap4-9   | keratin associated protein 4-9                                       | 23.89456 | 23.0939  | 18.13909 | 16.92906 | 20.76152 | 23.87734 |
| 17498084 | Krtap5-1   | keratin associated protein 5-1                                       | 12.20948 | 12.10088 | 10.15072 | 12.83081 | 5.637635 | 9.190797 |
| 17498059 | Krtap5-2   | keratin associated protein 5-2                                       | 4.346126 | 3.97237  | 4.989655 | 3.066855 | 3.981826 | 3.565242 |
| 17485187 | Krtap5-3   | keratin associated protein 5-3                                       | 4.499953 | 5.126769 | 3.899043 | 5.58203  | 6.132052 | 8.014597 |
| 17485194 | Krtap5-4   | keratin associated protein 5-4                                       | 25.96111 | 31.92822 | 24.67041 | 25.96111 | 35.45974 | 20.48676 |
| 17498072 | Krtap5-5   | keratin associated protein 5-5                                       | 6.319849 | 5.468329 | 6.784394 | 5.47994  | 6.748281 | 6.610869 |
| 17326930 | Krtap6-1   | keratin associated protein 6-1                                       | 3.808756 | 2.281211 | 2.780029 | 2.608698 | 2.396087 | 2.962017 |
| 17331903 | Krtap6-2   | keratin associated protein 6-2                                       | 3.190605 | 3.627134 | 2.327224 | 2.945556 | 3.561043 | 4.748165 |

|          |              |                                                                                   |          |          |          |          |          |          |
|----------|--------------|-----------------------------------------------------------------------------------|----------|----------|----------|----------|----------|----------|
| 17326933 | Krtap6-3     | keratin associated protein 6-3                                                    | 2.243747 | 2.600556 | 2.137212 | 2.507622 | 2.287022 | 2.406006 |
| 17331894 | Krtap6-5     | keratin associated protein 6-5                                                    | 1.824056 | 2.037514 | 1.874947 | 2.648912 | 1.894451 | 2.276378 |
| 17331910 | Krtap7-1     | keratin associated protein 7-1                                                    | 2.908368 | 3.073516 | 2.782767 | 2.782767 | 2.782767 | 2.457021 |
| 17331907 | Krtap8-1     | keratin associated protein 8-1                                                    | 2.56735  | 2.303919 | 2.529391 | 2.88144  | 2.406656 | 3.093264 |
| 17256314 | Krtap9-1     | keratin associated protein 9-1                                                    | 24.29268 | 22.36127 | 23.89522 | 24.57927 | 16.70745 | 18.95912 |
| 17269149 | Krtap9-3     | keratin associated protein 9-3                                                    | 3.39615  | 2.988932 | 2.898507 | 4.10653  | 3.152399 | 2.929856 |
| 17256336 | Krtap9-5     | keratin associated protein 9-5                                                    | 3.039976 | 3.456447 | 4.556323 | 3.261894 | 3.567516 | 3.664204 |
| 17331859 | Gm20741      | keratin associated protein pseudogene                                             | 3.462322 | 3.826937 | 3.051799 | 3.018894 | 3.545601 | 3.324322 |
| 17242318 | LOC102640500 | keratin-associated protein 10-8-like                                              | 52.24822 | 66.21013 | 68.70532 | 56.0946  | 54.38776 | 56.57724 |
| 17326936 | LOC102637070 | keratin-associated protein 20-2-like                                              | 4.4676   | 3.900313 | 5.725374 | 3.102863 | 3.052349 | 3.350276 |
| 17326938 | LOC102637192 | keratin-associated protein 20-2-like                                              | 2.813118 | 2.933636 | 2.432821 | 2.690753 | 3.767872 | 3.216206 |
| 17326944 | LOC102637417 | keratin-associated protein 20-2-like                                              | 24.53841 | 31.39363 | 31.91737 | 32.471   | 25.22776 | 28.82063 |
| 17498075 | LOC105243101 | keratin-associated protein 5-4-like                                               | 8.925667 | 4.52485  | 7.88926  | 3.974546 | 4.880402 | 4.669441 |
| 17485192 | LOC105243090 | keratin-associated protein 5-5-like                                               | 3.359788 | 6.029841 | 3.520646 | 4.215022 | 3.64753  | 4.798821 |
| 17399386 | Krtcap2      | keratinocyte associated protein 2                                                 | 40.91931 | 47.32301 | 57.73283 | 36.29452 | 51.60754 | 49.28819 |
| 17436099 | Krtcap3      | keratinocyte associated protein 3                                                 | 17.94003 | 19.86022 | 19.54151 | 28.81104 | 22.38949 | 16.66408 |
| 17476557 | Krtdap       | keratinocyte differentiation associated protein                                   | 5.835717 | 6.346143 | 6.39875  | 6.198847 | 5.719187 | 7.657959 |
| 17419613 | Kdfl         | keratinocyte differentiation factor 1                                             | 17.25114 | 15.36398 | 16.31356 | 16.35092 | 16.70884 | 16.48601 |
| 17407476 | Kprp         | keratinocyte expressed, proline-rich                                              | 5.762281 | 5.447446 | 6.319761 | 5.531727 | 5.169519 | 5.261594 |
| 17236816 | Kera         | keratocan                                                                         | 5.611786 | 5.317212 | 6.323486 | 4.842862 | 5.120306 | 5.080463 |
| 17435934 | Khk          | ketoheokinase                                                                     | 363.4996 | 268.532  | 263.3997 | 329.9355 | 294.1422 | 361.8656 |
| 17300697 | Khynyn       | KH and NYN domain containing                                                      | 17.91554 | 21.33722 | 26.35528 | 26.3361  | 23.62791 | 25.54165 |
| 17211416 | Khdca1a      | KH domain containing 1A                                                           | 3.412384 | 2.833784 | 3.782657 | 3.220646 | 4.627779 | 2.742877 |
| 17211429 | Khdca1b      | KH domain containing 1B                                                           | 3.147268 | 2.937095 | 2.746758 | 4.150917 | 3.627184 | 2.603748 |
| 17211423 | Khdca1c      | KH domain containing 1C                                                           | 4.628517 | 5.137762 | 3.263862 | 6.943774 | 2.166911 | 3.520475 |
| 17519290 | Khdca3       | KH domain containing 3, subcortical maternal complex member                       | 6.706314 | 6.831489 | 8.882895 | 6.42466  | 6.610136 | 6.161493 |
| 17430533 | Khdrbs1      | KH domain containing, RNA binding, signal transduction associated 1               | 21.7851  | 27.06507 | 22.94694 | 31.29434 | 26.87141 | 27.39309 |
| 17211548 | Khdrbs2      | KH domain containing, RNA binding, signal transduction associated 2               | 7.475189 | 5.558016 | 6.664931 | 6.94647  | 7.013526 | 7.334405 |
| 17312054 | Khdrbs3      | KH domain containing, RNA binding, signal transduction associated 3               | 44.14567 | 52.49834 | 44.30599 | 45.59709 | 35.14676 | 43.41856 |
| 17346427 | Khsrp        | KH-type splicing regulatory protein                                               | 73.51058 | 62.36696 | 70.62172 | 56.57999 | 65.41094 | 64.21997 |
| 17471980 | Kap          | kidney androgen regulated protein                                                 | 4.143213 | 3.329418 | 3.507176 | 3.367388 | 3.890997 | 3.714325 |
| 17357861 | Keg1         | kidney expressed gene 1                                                           | 227.4617 | 120.8237 | 58.2958  | 227.1167 | 107.2638 | 58.88752 |
| 17465407 | Kcp          | kielin/chordin-like protein                                                       | 11.97165 | 21.0994  | 21.1615  | 18.36644 | 13.98482 | 14.32556 |
| 17241420 | Kif1bp       | KIF1 binding protein                                                              | 23.04785 | 20.72356 | 24.37787 | 27.17466 | 21.77242 | 21.31947 |
| 17537906 | Kir3dl1      | killer cell immunoglobulin-like receptor, three domains, long cytoplasmic tail, 1 | 5.499346 | 5.300432 | 3.782841 | 4.846758 | 4.99675  | 4.603113 |
| 17544740 | Kir3dl2      | killer cell immunoglobulin-like receptor, three domains, long cytoplasmic tail, 2 | 2.575442 | 2.728977 | 3.401238 | 3.06728  | 2.460941 | 2.372585 |
| 17463557 | Klr1         | killer cell lectin-like receptor family E member 1                                | 3.227484 | 2.830938 | 2.955864 | 3.238038 | 3.311558 | 3.277305 |
| 17471608 | Klr11        | killer cell lectin-like receptor family I member 1                                | 3.757909 | 4.150543 | 3.339703 | 3.381258 | 3.381258 | 3.043265 |
| 17471616 | Klr12        | killer cell lectin-like receptor family I member 2                                | 3.370564 | 2.423799 | 3.275488 | 2.953407 | 2.848278 | 2.661593 |
| 17471768 | Klr10        | killer cell lectin-like receptor subfamily A, member 10                           | 2.050364 | 2.713378 | 2.083545 | 3.038396 | 2.462903 | 2.391656 |
| 17471717 | Klr11-ps     | killer cell lectin-like receptor subfamily A, member 11, pseudogene [Source:MGI S | 4.315058 | 3.567145 | 2.728712 | 3.008658 | 3.008658 | 3.008658 |
| 17471744 | Klr14-ps     | killer cell lectin-like receptor subfamily A, member 14, pseudogene               | 3.738838 | 3.180955 | 5.776838 | 4.941914 | 2.800064 | 5.662032 |
| 17471757 | Klr9         | killer cell lectin-like receptor subfamily A, member 9                            | 2.902568 | 2.211538 | 2.657777 | 2.620224 | 2.329386 | 2.586103 |
| 17471445 | Klrb1        | killer cell lectin-like receptor subfamily B member 1                             | 3.607226 | 6.031346 | 6.589368 | 4.405788 | 7.377029 | 3.300352 |
| 17463493 | Klrb1-ps1    | killer cell lectin-like receptor subfamily B member 1, pseudogene 1               | 3.05472  | 2.623477 | 2.411933 | 2.606909 | 2.565162 | 3.959944 |
| 17471431 | Klrb1a       | killer cell lectin-like receptor subfamily B member 1A                            | 2.891925 | 2.586982 | 2.601782 | 2.015545 | 4.511259 | 2.52671  |
| 17471464 | Klrb1b       | killer cell lectin-like receptor subfamily B member 1B                            | 3.684145 | 3.629599 | 3.483144 | 5.333158 | 3.841128 | 3.853448 |
| 17471452 | Klrb1c       | killer cell lectin-like receptor subfamily B member 1C                            | 4.349954 | 4.903901 | 4.423566 | 3.480778 | 3.902125 | 4.109378 |
| 17463482 | Klrb1f       | killer cell lectin-like receptor subfamily B member 1F                            | 3.843232 | 4.659096 | 3.825345 | 4.453841 | 3.832246 | 3.151678 |
| 17471598 | Klrc1        | killer cell lectin-like receptor subfamily C, member 1                            | 3.307979 | 4.90013  | 2.403889 | 3.233799 | 4.049658 | 4.97715  |
| 17471586 | Klrc2        | killer cell lectin-like receptor subfamily C, member 2                            | 2.87697  | 2.714977 | 3.135401 | 2.602972 | 2.512285 | 2.393928 |
| 17471578 | Klrc3        | killer cell lectin-like receptor subfamily C, member 3                            | 2.049526 | 1.918276 | 1.797971 | 2.60877  | 3.291146 | 2.86501  |
| 17470533 | Klrg1        | killer cell lectin-like receptor subfamily G, member 1                            | 3.755617 | 3.108848 | 3.339703 | 3.544495 | 3.41236  | 3.334776 |
| 17466025 | Klrg2        | killer cell lectin-like receptor subfamily G, member 2                            | 8.774884 | 10.56961 | 11.41477 | 11.14126 | 11.04384 | 11.04905 |
| 17471565 | Klrk1        | killer cell lectin-like receptor subfamily K, member 1                            | 5.824079 | 5.794604 | 6.154962 | 5.607859 | 5.074761 | 6.700599 |
| 17471635 | Klra17       | killer cell lectin-like receptor, subfamily A, member 17                          | 3.911928 | 3.587428 | 3.990003 | 3.573332 | 4.48597  | 3.607326 |
| 17471828 | Klra2        | killer cell lectin-like receptor, subfamily A, member 2                           | 8.786813 | 10.60175 | 9.624289 | 10.16022 | 12.9128  | 9.333059 |
| 17471778 | Klra3        | killer cell lectin-like receptor, subfamily A, member 3                           | 2.452937 | 2.460156 | 2.664805 | 3.934881 | 2.490491 | 2.937808 |
| 17471648 | Klra5        | killer cell lectin-like receptor, subfamily A, member 5                           | 4.047497 | 3.347537 | 2.961237 | 3.309515 | 2.895395 | 2.545713 |
| 17471707 | Klra6        | killer cell lectin-like receptor, subfamily A, member 6                           | 2.485524 | 2.404955 | 2.404872 | 2.582217 | 2.478092 | 3.33931  |
| 17471659 | Klra7        | killer cell lectin-like receptor, subfamily A, member 7                           | 2.406006 | 2.191958 | 2.509865 | 2.406006 | 2.406006 | 2.393049 |
| 17463567 | Kldr1        | killer cell lectin-like receptor, subfamily D, member 1                           | 4.945615 | 3.463138 | 4.360701 | 3.52089  | 4.153795 | 4.905941 |
| 17406492 | Kirrel       | kin of IRRE like (Drosophila)                                                     | 8.664701 | 10.47196 | 10.22139 | 9.337394 | 7.566835 | 8.908546 |
| 17489071 | Kirrel2      | kin of IRRE like 2 (Drosophila)                                                   | 7.19797  | 7.698994 | 7.698994 | 7.698994 | 7.698994 | 7.734886 |
| 17515843 | Kirrel3      | kin of IRRE like 3 (Drosophila)                                                   | 5.878304 | 6.992896 | 6.035319 | 8.381625 | 7.888549 | 9.212163 |
| 17525324 | Kirrel3os    | kin of IRRE like 3 (Drosophila), opposite strand                                  | 4.341158 | 4.701301 | 4.750206 | 3.476221 | 4.386469 | 5.209193 |
| 17274574 | Kidins220    | kinase D-interacting substrate 220                                                | 134.9125 | 117.045  | 118.0047 | 105.7688 | 100.654  | 105.2444 |
| 17448924 | Kdr          | kinase insert domain protein receptor                                             | 104.1934 | 80.02784 | 106.0529 | 90.68047 | 56.4116  | 59.13908 |
| 17484419 | Kndc1        | kinase non-catalytic C-lobe domain (KIND) containing 1                            | 5.94456  | 7.864309 | 6.597503 | 6.183913 | 4.588333 | 5.394092 |
| 17266534 | Ksr1         | kinase suppressor of ras 1                                                        | 12.35189 | 11.36259 | 13.80204 | 12.6172  | 10.57906 | 13.79258 |
| 17441429 | Ksr2         | kinase suppressor of ras 2                                                        | 7.680552 | 10.54794 | 9.62529  | 8.553471 | 7.919504 | 7.630936 |
| 17299353 | Ktn1         | kinectin 1                                                                        | 23.43739 | 31.40647 | 31.42346 | 32.59458 | 29.59292 | 28.00087 |
| 17359020 | Kif11        | kinesin family member 11                                                          | 8.086638 | 6.193694 | 6.718318 | 5.934679 | 7.038119 | 6.193694 |
| 17426251 | Kif12        | kinesin family member 12                                                          | 7.519361 | 7.519361 | 7.558657 | 7.953556 | 6.940791 | 7.841937 |
| 17292215 | Kif13a       | kinesin family member 13A                                                         | 25.51723 | 31.27613 | 31.62777 | 31.83672 | 30.91532 | 31.62777 |
| 17301300 | Kif13b       | kinesin family member 13B                                                         | 83.00003 | 86.41201 | 77.18133 | 85.29977 | 84.07996 | 80.36024 |
| 17217789 | Kif14        | kinesin family member 14                                                          | 3.782107 | 4.743954 | 5.205331 | 4.355897 | 4.719716 | 4.514042 |
| 17523494 | Kif15        | kinesin family member 15                                                          | 2.684884 | 3.374561 | 3.75161  | 3.06711  | 3.576628 | 2.964153 |
| 17392279 | Kif16b       | kinesin family member 16B                                                         | 28.32649 | 31.89437 | 32.74063 | 35.90642 | 23.20767 | 28.75279 |
| 17376974 | Kif16bos     | kinesin family member 16B, opposite strand                                        | 4.01461  | 4.287242 | 4.345674 | 4.426081 | 4.256861 | 3.950294 |
| 17420462 | Kif17        | kinesin family member 17                                                          | 8.933156 | 10.06092 | 10.9598  | 9.459278 | 7.142653 | 10.44203 |
| 17374058 | Kif18a       | kinesin family member 18A                                                         | 3.941296 | 4.314939 | 4.314939 | 3.828794 | 4.521088 | 4.735248 |
| 17270369 | Kif18b       | kinesin family member 18B                                                         | 6.663592 | 9.268719 | 7.698994 | 8.733379 | 7.260556 | 8.750892 |
| 17537207 | Gm7134       | kinesin family member 18B pseudogene                                              | 10.55431 | 10.47022 | 6.905663 | 10.93961 | 9.886706 | 6.447813 |

|          |         |                                                                 |          |          |          |          |          |          |
|----------|---------|-----------------------------------------------------------------|----------|----------|----------|----------|----------|----------|
| 17258064 | Kif19a  | kinesin family member 19A                                       | 8.942821 | 9.057356 | 8.995229 | 9.806715 | 10.40107 | 11.01097 |
| 17225630 | Kif1a   | kinesin family member 1A                                        | 5.891806 | 5.891806 | 5.316438 | 5.868981 | 5.127978 | 5.891806 |
| 17433055 | Kif1b   | kinesin family member 1B                                        | 142.2259 | 186.945  | 200.7464 | 172.0209 | 170.1437 | 178.6324 |
| 17252200 | Kif1c   | kinesin family member 1C                                        | 155.6887 | 175.2888 | 182.9138 | 168.5614 | 166.3583 | 166.1716 |
| 17349433 | Kif20a  | kinesin family member 20A                                       | 6.293271 | 6.313019 | 6.05153  | 6.899778 | 6.245989 | 8.254266 |
| 17358838 | Kif20b  | kinesin family member 20B                                       | 4.21546  | 5.618558 | 4.423566 | 4.48426  | 3.379852 | 4.597215 |
| 17320614 | Kif21a  | kinesin family member 21A                                       | 96.84663 | 113.9021 | 116.9607 | 96.93663 | 106.8646 | 127.0736 |
| 17217728 | Kif21b  | kinesin family member 21B                                       | 10.87776 | 8.213744 | 9.515899 | 11.62243 | 10.4838  | 12.98874 |
| 17496568 | Kif22   | kinesin family member 22                                        | 9.898569 | 6.236082 | 6.214766 | 7.344224 | 9.46938  | 7.518683 |
| 17527934 | Kif23   | kinesin family member 23                                        | 4.952922 | 4.801649 | 4.801649 | 4.801649 | 4.014165 | 5.193114 |
| 17424219 | Kif24   | kinesin family member 24                                        | 3.65852  | 3.433524 | 3.776422 | 3.383696 | 3.729055 | 3.462322 |
| 17279299 | Kif26a  | kinesin family member 26A                                       | 8.29108  | 9.310251 | 10.03264 | 10.60652 | 9.310251 | 8.81127  |
| 17219997 | Kif26b  | kinesin family member 26B                                       | 10.49885 | 12.86857 | 12.53708 | 14.61999 | 13.09587 | 11.01174 |
| 17293116 | Kif27   | kinesin family member 27                                        | 3.545846 | 3.844724 | 3.541278 | 3.927959 | 3.844724 | 4.590305 |
| 17296052 | Kif2a   | kinesin family member 2A                                        | 15.21708 | 19.05965 | 16.22571 | 17.80425 | 15.12874 | 17.85802 |
| 17267768 | Kif2b   | kinesin family member 2B                                        | 4.505384 | 4.923963 | 5.620584 | 4.801649 | 4.27718  | 4.801649 |
| 17428803 | Kif2c   | kinesin family member 2C                                        | 5.122613 | 5.231302 | 5.556437 | 5.225395 | 4.555944 | 4.824669 |
| 17249561 | Kif3a   | kinesin family member 3A                                        | 10.77764 | 9.22603  | 10.33553 | 11.81133 | 8.845232 | 7.911493 |
| 17377926 | Kif3b   | kinesin family member 3B                                        | 18.08548 | 14.92925 | 16.19706 | 15.36813 | 12.04715 | 16.19706 |
| 17273591 | Kif3c   | kinesin family member 3C                                        | 9.512206 | 13.69654 | 10.93901 | 8.822026 | 9.973432 | 9.973432 |
| 17536566 | Kif4    | kinesin family member 4                                         | 3.263862 | 3.862781 | 3.421431 | 2.972692 | 4.067747 | 3.265627 |
| 17277976 | Kif4-ps | kinesin family member 4, pseudogene                             | 4.681238 | 2.550906 | 2.60299  | 4.010578 | 4.40124  | 2.856127 |
| 17245798 | Kif5a   | kinesin family member 5A                                        | 4.423597 | 5.653052 | 4.954193 | 4.738597 | 5.74143  | 5.18592  |
| 17352462 | Kif5b   | kinesin family member 5B                                        | 112.3674 | 102.9143 | 89.29392 | 92.08409 | 99.60871 | 89.91812 |
| 17370659 | Kif5c   | kinesin family member 5C                                        | 3.339703 | 3.003116 | 2.719007 | 4.263948 | 4.352065 | 3.433786 |
| 17338492 | Kif6    | kinesin family member 6                                         | 6.347551 | 6.14831  | 6.968509 | 6.395468 | 6.811205 | 6.417093 |
| 17492385 | Kif7    | kinesin family member 7                                         | 10.48228 | 10.48228 | 10.43957 | 10.34542 | 10.91606 | 8.776952 |
| 17522377 | Kif9    | kinesin family member 9                                         | 2.526973 | 3.883991 | 6.204436 | 5.716571 | 3.697628 | 4.297001 |
| 17343652 | Kifc1   | kinesin family member C1                                        | 3.784467 | 9.011267 | 4.316165 | 3.422736 | 4.17342  | 6.904467 |
| 17312531 | Kifc2   | kinesin family member C2                                        | 9.636037 | 12.88249 | 17.10054 | 13.72163 | 11.6509  | 12.28529 |
| 17511927 | Kifc3   | kinesin family member C3                                        | 27.29377 | 28.37896 | 30.07577 | 26.76118 | 26.76118 | 23.65331 |
| 17334983 | Kifc5b  | kinesin family member C5B                                       | 2.648673 | 5.550278 | 5.126307 | 5.704577 | 4.396605 | 8.607415 |
| 17279210 | Klc1    | kinesin light chain 1                                           | 36.39681 | 39.33086 | 38.24714 | 38.92001 | 44.03046 | 36.02584 |
| 17361470 | Klc2    | kinesin light chain 2                                           | 13.25192 | 17.00232 | 11.48708 | 14.97288 | 15.73363 | 14.76194 |
| 17487226 | Klc3    | kinesin light chain 3                                           | 14.37958 | 14.37958 | 14.35031 | 12.82876 | 13.96477 | 15.75677 |
| 17345499 | Klc4    | kinesin light chain 4                                           | 53.12761 | 49.76743 | 50.45271 | 54.96114 | 41.57459 | 61.20043 |
| 17435734 | Gm4961  | kinesin superfamily protein 2C pseudogene                       | 2.590661 | 2.982516 | 2.669815 | 3.222522 | 2.976321 | 3.339703 |
| 17218765 | Kifap3  | kinesin-associated protein 3                                    | 23.61841 | 19.81238 | 24.56121 | 24.56121 | 20.31481 | 26.6588  |
| 17442332 | Kntc1   | kinetochore associated 1                                        | 3.669211 | 3.993241 | 3.719581 | 4.214028 | 3.975345 | 3.638743 |
| 17374632 | Knstrn  | kinetochore-localized astrin/SPAG5 binding                      | 6.171709 | 6.903223 | 6.438167 | 6.501443 | 7.042609 | 6.54798  |
| 17324356 | Kng1    | kininogen 1                                                     | 356.1621 | 374.0585 | 392.9604 | 348.7236 | 456.9239 | 329.6406 |
| 17329361 | Kng2    | kininogen 2                                                     | 506.0268 | 509.6419 | 559.669  | 424.2821 | 657.784  | 462.7054 |
| 17417336 | Kncn    | kinocilin                                                       | 10.63369 | 15.30679 | 8.630356 | 12.2221  | 8.407751 | 14.31951 |
| 17217329 | Kiss1   | KISS-1 metastasis-suppressor                                    | 11.4571  | 12.64574 | 9.089116 | 12.97794 | 9.355469 | 12.67971 |
| 17235029 | Kiss1r  | KISS1 receptor                                                  | 6.883632 | 9.391464 | 9.391464 | 9.391464 | 9.458884 | 14.6213  |
| 17236900 | Kitl    | kit ligand                                                      | 5.562487 | 4.91704  | 5.128582 | 4.383217 | 5.889397 | 3.941733 |
| 17438272 | Kit     | kit oncogene                                                    | 17.32796 | 15.09344 | 20.81483 | 21.81684 | 15.28177 | 13.11676 |
| 17377268 | Kiz     | kizuna centrosomal protein                                      | 34.33243 | 27.63702 | 32.12178 | 32.62826 | 36.70895 | 36.05182 |
| 17445238 | Kl      | klotho                                                          | 4.519929 | 5.215986 | 4.665106 | 4.581246 | 6.992896 | 4.625278 |
| 17437765 | Klb     | klotho beta                                                     | 77.71817 | 103.4737 | 91.21948 | 101.2887 | 118.439  | 98.06049 |
| 17358324 | Kank1   | KN motif and ankyrin repeat domains 1                           | 63.95787 | 60.45333 | 62.6386  | 62.22791 | 42.69455 | 50.27328 |
| 17524760 | Kank2   | KN motif and ankyrin repeat domains 2                           | 37.93191 | 40.23307 | 42.74459 | 36.57079 | 42.17073 | 42.35734 |
| 17336175 | Kank3   | KN motif and ankyrin repeat domains 3                           | 12.23634 | 12.02096 | 17.74536 | 14.79082 | 12.66557 | 15.89466 |
| 17427476 | Kank4   | KN motif and ankyrin repeat domains 4                           | 11.00327 | 11.47641 | 12.41851 | 12.09023 | 10.44623 | 12.21439 |
| 17415711 | Kank4os | KN motif and ankyrin repeat domains 4, opposite strand          | 5.768555 | 6.320856 | 6.290436 | 8.269557 | 5.676415 | 6.67242  |
| 17458163 | Krba1   | KRAB-A domain containing 1                                      | 14.89287 | 11.95805 | 13.84401 | 10.94052 | 12.09467 | 15.83231 |
| 17524677 | Kri1    | KRI1 homolog (S. cerevisiae)                                    | 11.34567 | 14.75795 | 13.25128 | 14.58062 | 15.09187 | 16.45564 |
| 17260137 | Kremen1 | kringle containing transmembrane protein 1                      | 33.41282 | 36.06031 | 34.37315 | 35.49638 | 31.33776 | 38.30418 |
| 17341595 | Kremen2 | kringle containing transmembrane protein 2                      | 14.84608 | 15.43539 | 17.64613 | 18.49675 | 18.64194 | 18.8616  |
| 17434381 | Krit1   | KRIT1, ankyrin repeat containing                                | 63.76929 | 62.66205 | 50.74698 | 62.84953 | 57.16103 | 57.16103 |
| 17237284 | Krr1    | KRR1, small subunit (SSU) processome component, homolog (yeast) | 49.00408 | 38.62653 | 36.75249 | 47.83849 | 37.05535 | 41.29857 |
| 17503254 | Klf1    | Kruppel-like factor 1 (erythroid)                               | 8.228959 | 8.346666 | 7.363543 | 8.526124 | 10.38932 | 8.806386 |
| 17316690 | Klf10   | Kruppel-like factor 10                                          | 20.57371 | 44.18761 | 41.91835 | 49.0503  | 54.76112 | 47.74044 |
| 17274532 | Klf11   | Kruppel-like factor 11                                          | 45.55918 | 73.53147 | 65.51621 | 57.27843 | 61.28576 | 55.96023 |
| 17309099 | Klf12   | Kruppel-like factor 12                                          | 46.53551 | 52.83639 | 51.96974 | 49.40893 | 52.32397 | 61.18177 |
| 17491788 | Klf13   | Kruppel-like factor 13                                          | 18.28451 | 20.05139 | 20.00266 | 21.40818 | 25.07278 | 24.03409 |
| 17465597 | Klf14   | Kruppel-like factor 14                                          | 12.22193 | 11.30509 | 11.82944 | 11.11395 | 9.634635 | 15.34844 |
| 17460826 | Klf15   | Kruppel-like factor 15                                          | 136.2942 | 181.9124 | 193.1182 | 178.401  | 206.5218 | 263.8108 |
| 17243010 | Klf16   | Kruppel-like factor 16                                          | 15.69094 | 19.28597 | 16.7019  | 13.02779 | 17.11762 | 15.99069 |
| 17428904 | Klf17   | Kruppel-like factor 17                                          | 9.123011 | 6.439193 | 11.798   | 7.340763 | 4.968705 | 8.119439 |
| 17502440 | Klf2    | Kruppel-like factor 2 (lung)                                    | 20.02388 | 26.01208 | 24.76619 | 28.22008 | 15.14154 | 23.59174 |
| 17437674 | Klf3    | Kruppel-like factor 3 (basic)                                   | 69.40992 | 80.31848 | 73.08229 | 70.93226 | 77.54759 | 83.89309 |
| 17425401 | Klf4    | Kruppel-like factor 4 (gut)                                     | 9.477129 | 13.16769 | 15.01987 | 13.98948 | 13.43813 | 13.9099  |
| 17302397 | Klf5    | Kruppel-like factor 5                                           | 7.698994 | 8.511008 | 7.88587  | 7.672677 | 6.951335 | 7.156777 |
| 17285000 | Klf6    | Kruppel-like factor 6                                           | 41.28655 | 64.35231 | 68.44817 | 37.95479 | 43.00493 | 41.35156 |
| 17223766 | Klf7    | Kruppel-like factor 7 (ubiquitous)                              | 12.13549 | 13.86254 | 14.46105 | 12.44626 | 11.47061 | 12.76711 |
| 17539004 | Klf8    | Kruppel-like factor 8                                           | 3.062691 | 3.263862 | 3.566428 | 3.374047 | 2.997542 | 4.160134 |
| 17358214 | Klf9    | Kruppel-like factor 9                                           | 180.4693 | 220.5375 | 178.1946 | 197.9758 | 209.4424 | 231.396  |
| 17416761 | Kti12   | KTI12 homolog, chromatin associated (S. cerevisiae)             | 57.67243 | 56.07361 | 51.7763  | 53.40045 | 44.9893  | 53.49789 |
| 17391270 | Kcnip3  | Kv channel interacting protein 3, calsenilin                    | 7.954659 | 10.9513  | 10.09144 | 9.633166 | 9.063888 | 10.79192 |
| 17447963 | Kcnip4  | Kv channel interacting protein 4                                | 2.608789 | 3.126763 | 4.064647 | 4.622073 | 4.028548 | 3.063647 |
| 17261622 | Kcnip1  | Kv channel-interacting protein 1                                | 5.605954 | 5.567964 | 5.984746 | 6.539317 | 6.038667 | 7.202811 |
| 17365270 | Kcnip2  | Kv channel-interacting protein 2                                | 3.721102 | 3.827706 | 3.389165 | 3.422807 | 3.25654  | 4.196335 |
| 17510080 | Kxd1    | KxDL motif containing 1                                         | 10.9356  | 15.0694  | 18.92144 | 14.64778 | 18.86434 | 16.58101 |

|          |         |                                                            |          |          |          |          |          |          |
|----------|---------|------------------------------------------------------------|----------|----------|----------|----------|----------|----------|
| 17370527 | Kynu    | kynureninase (L-kynurenine hydrolase)                      | 314.6491 | 246.7267 | 231.2453 | 295.6384 | 275.8576 | 323.5063 |
| 17219789 | Kmo     | kynurenine 3-monooxygenase (kynurenine 3-hydroxylase)      | 718.0199 | 721.3722 | 762.4823 | 791.8866 | 714.7129 | 687.0208 |
| 17520835 | Ky      | kyphoscoliosis peptidase                                   | 3.862166 | 3.837748 | 3.887466 | 4.038053 | 6.53062  | 3.771007 |
| 17542654 | Lage3   | L antigen family, member 3                                 | 6.411669 | 8.422742 | 7.064268 | 6.178343 | 9.034032 | 7.929995 |
| 17379139 | L3mbtl1 | l(3)mbt-like (Drosophila)                                  | 5.24779  | 4.129108 | 3.70494  | 5.719821 | 4.06138  | 4.643459 |
| 17313322 | L3mbtl2 | l(3)mbt-like 2 (Drosophila)                                | 53.79201 | 50.49295 | 38.74344 | 46.02418 | 41.71198 | 45.99069 |
| 17239889 | L3mbtl3 | l(3)mbt-like 3 (Drosophila)                                | 13.75811 | 18.09413 | 17.81475 | 14.17385 | 18.82477 | 18.78423 |
| 17339289 | L3mbtl4 | l(3)mbt-like 4 (Drosophila)                                | 5.667608 | 4.830391 | 4.699476 | 5.112149 | 5.127445 | 4.016893 |
| 17542419 | L1cam   | L1 cell adhesion molecule                                  | 6.791216 | 6.287864 | 7.084078 | 8.055365 | 9.746539 | 7.879423 |
| 17281609 | L2hgdh  | L-2-hydroxyglutarate dehydrogenase                         | 80.304   | 74.97096 | 62.68333 | 73.82154 | 68.25108 | 80.70633 |
| 17281791 | L3hypdh | L-3-hydroxyproline dehydratase (trans-)                    | 36.54013 | 31.36209 | 32.01975 | 33.47309 | 33.95142 | 35.72619 |
| 17249929 | Larp1   | La ribonucleoprotein domain family, member 1               | 278.6094 | 249.7308 | 266.8879 | 252.4406 | 285.3661 | 254.6126 |
| 17397320 | Larp1b  | La ribonucleoprotein domain family, member 1B              | 200.253  | 171.9148 | 152.6105 | 196.8278 | 185.7772 | 224.1033 |
| 17314910 | Larp4   | La ribonucleoprotein domain family, member 4               | 184.9434 | 170.6776 | 133.2083 | 160.7795 | 163.5434 | 157.9725 |
| 17285074 | Larp4b  | La ribonucleoprotein domain family, member 4B              | 212.2308 | 202.7011 | 197.2867 | 196.3563 | 186.9748 | 178.6757 |
| 17518095 | Larp6   | La ribonucleoprotein domain family, member 6               | 7.30017  | 10.55233 | 8.946417 | 12.99487 | 9.310251 | 8.047162 |
| 17410190 | Larp7   | La ribonucleoprotein domain family, member 7               | 28.72251 | 25.09486 | 28.11094 | 27.97391 | 29.39258 | 31.76883 |
| 17308772 | Lacc1   | laccase (multicopper oxidoreductase) domain containing 1   | 24.30599 | 31.85218 | 40.8989  | 26.16108 | 27.72182 | 23.93567 |
| 17321221 | Lalba   | lactalbumin, alpha                                         | 2.916969 | 3.338616 | 2.708173 | 3.337713 | 2.615705 | 4.182803 |
| 17528418 | Lactb   | lactamase, beta                                            | 75.02763 | 60.70906 | 61.90654 | 59.1354  | 65.75187 | 68.18157 |
| 17221360 | Lactb2  | lactamase, beta 2                                          | 778.4713 | 626.3607 | 556.524  | 695.0341 | 524.7367 | 619.4526 |
| 17420139 | Lactbl1 | lactamase, beta-like 1                                     | 6.584026 | 5.453264 | 6.902026 | 5.874883 | 6.049517 | 5.89675  |
| 17226531 | Lct     | lactase                                                    | 4.20927  | 6.287864 | 4.20927  | 4.20927  | 3.971599 | 4.130167 |
| 17518278 | Lctl    | lactase-like                                               | 4.20927  | 4.339203 | 4.579849 | 3.988704 | 4.130167 | 4.20927  |
| 17478225 | Ldha    | lactate dehydrogenase A                                    | 21.2659  | 21.77031 | 19.28571 | 18.72923 | 21.32613 | 20.12016 |
| 17367190 | Gm13315 | lactate dehydrogenase A pseudogene                         | 5.768595 | 7.114735 | 8.734772 | 9.314769 | 8.389065 | 6.373121 |
| 17340493 | Ldhal6b | lactate dehydrogenase A-like 6B                            | 6.089737 | 5.79103  | 7.223059 | 8.555309 | 6.666641 | 7.215653 |
| 17472517 | Ldhb    | lactate dehydrogenase B                                    | 6.464954 | 6.764109 | 6.555655 | 6.67825  | 6.46697  | 7.294757 |
| 17478243 | Ldhc    | lactate dehydrogenase C                                    | 5.338965 | 5.338965 | 5.809001 | 6.436204 | 5.338965 | 5.238632 |
| 17513135 | Ldhd    | lactate dehydrogenase D                                    | 325.2285 | 243.0619 | 202.8838 | 235.1129 | 248.672  | 209.9759 |
| 17240538 | Lace1   | lactation elevated 1                                       | 25.30008 | 20.95017 | 27.69839 | 25.81182 | 12.82165 | 25.37208 |
| 17267504 | Lpo     | lactoperoxidase                                            | 8.833897 | 9.182646 | 9.448793 | 6.488343 | 8.023713 | 9.514514 |
| 17522555 | Ltf     | lactotransferrin                                           | 4.01461  | 5.007811 | 5.617429 | 4.980222 | 5.525749 | 5.035029 |
| 17217639 | Lad1    | ladinin                                                    | 35.42608 | 37.29913 | 42.29397 | 44.45612 | 31.71163 | 31.54217 |
| 17365193 | Lbx1    | ladybird homeobox homolog 1 (Drosophila)                   | 6.929398 | 6.189659 | 4.913905 | 6.707895 | 6.805872 | 6.701946 |
| 17459929 | Lbx2    | ladybird homeobox homolog 2 (Drosophila)                   | 4.768283 | 4.793867 | 5.635252 | 5.60576  | 4.469582 | 4.806877 |
| 17350378 | Lvrn    | laeverin                                                   | 4.766268 | 4.20927  | 4.165385 | 5.079688 | 3.875547 | 4.18608  |
| 17406783 | Lmna    | lamin A                                                    | 27.72643 | 25.43212 | 28.93793 | 28.07025 | 27.14642 | 27.95298 |
| 17230550 | Lbr     | lamin B receptor                                           | 44.67451 | 30.78701 | 31.82768 | 28.91367 | 31.33059 | 27.62476 |
| 17230566 | Lbr     | lamin B receptor                                           | 3.566799 | 2.855988 | 2.901703 | 3.182653 | 2.369972 | 3.41771  |
| 17350740 | Lmnbl   | lamin B1                                                   | 20.93101 | 20.96571 | 20.901   | 18.85532 | 26.00199 | 23.13572 |
| 17243128 | Lmnbl2  | lamin B2                                                   | 15.29894 | 16.08785 | 14.1825  | 12.79448 | 14.50311 | 16.38348 |
| 17497796 | Lmntd2  | lamin tail domain containing 2                             | 9.004399 | 7.992573 | 7.118928 | 9.182137 | 7.868235 | 7.158613 |
| 17274775 | Lamb1   | laminin B1                                                 | 19.78191 | 23.2805  | 20.74224 | 18.62166 | 19.01729 | 17.88539 |
| 17369580 | Lamc3   | laminin gamma 3                                            | 7.776063 | 10.38745 | 8.435479 | 8.222061 | 6.579236 | 9.57087  |
| 17339223 | Lama1   | laminin, alpha 1                                           | 13.96264 | 17.23047 | 15.2714  | 14.20119 | 12.92399 | 17.71071 |
| 17239919 | Lama2   | laminin, alpha 2                                           | 6.791828 | 7.412396 | 7.48421  | 7.412396 | 7.412396 | 7.169189 |
| 17348492 | Lama3   | laminin, alpha 3                                           | 11.03412 | 7.208854 | 8.276381 | 9.13972  | 7.974256 | 8.384124 |
| 17232593 | Lama4   | laminin, alpha 4                                           | 12.13532 | 12.70769 | 14.10183 | 10.28693 | 12.33572 | 11.32195 |
| 17395512 | Lama5   | laminin, alpha 5                                           | 7.682788 | 10.00279 | 12.30131 | 10.48198 | 8.512424 | 9.398562 |
| 17521727 | Lamb2   | laminin, beta 2                                            | 11.24366 | 12.17669 | 12.04991 | 8.650539 | 8.323782 | 12.95251 |
| 17220944 | Lamb3   | laminin, beta 3                                            | 15.86538 | 18.49649 | 23.92671 | 15.361   | 13.9918  | 13.66913 |
| 17228164 | Lamc1   | laminin, gamma 1                                           | 31.52709 | 39.95489 | 48.70979 | 40.16119 | 32.3553  | 33.72742 |
| 17228136 | Lamc2   | laminin, gamma 2                                           | 6.992896 | 6.844855 | 6.170554 | 5.024361 | 7.904641 | 7.593474 |
| 17417826 | Lao1    | L-amino acid oxidase 1                                     | 3.387052 | 3.883991 | 3.729055 | 3.363259 | 3.461194 | 4.809244 |
| 17223932 | Lanc1   | LanC (bacterial lantibiotic synthetase component C)-like 1 | 41.52937 | 39.3126  | 46.71746 | 49.14354 | 38.4084  | 38.59173 |
| 17458990 | Lanc2   | LanC (bacterial lantibiotic synthetase component C)-like 2 | 25.8453  | 23.65298 | 22.34608 | 21.50306 | 25.52838 | 33.19951 |
| 17533199 | Lanc3   | LanC lantibiotic synthetase component C-like 3 (bacterial) | 3.557121 | 3.263862 | 3.678481 | 3.427674 | 3.732986 | 3.40957  |
| 17234552 | Lss     | lanosterol synthase                                        | 45.50175 | 32.90534 | 41.43218 | 27.28886 | 44.09704 | 27.80495 |
| 17329692 | Lsg1    | large subunit GTPase 1 homolog (S. cerevisiae)             | 41.52534 | 31.88509 | 33.5358  | 33.306   | 32.66401 | 36.8944  |
| 17231545 | Lats1   | large tumor suppressor                                     | 50.32558 | 47.48862 | 53.77002 | 50.1612  | 51.63545 | 51.4486  |
| 17307184 | Lats2   | large tumor suppressor 2                                   | 19.08795 | 23.68776 | 18.28375 | 14.71657 | 19.08795 | 20.54065 |
| 17543336 | Las1l   | LAS1-like (S. cerevisiae)                                  | 25.21097 | 26.28704 | 29.44458 | 27.68092 | 32.03973 | 25.45187 |
| 17407431 | Lce1a1  | late cornified envelope 1A1                                | 2.269965 | 2.042888 | 2.316024 | 2.419233 | 2.491907 | 2.269965 |
| 17407439 | Lce1a2  | late cornified envelope 1A2                                | 4.268207 | 4.475193 | 4.204167 | 4.157568 | 3.263839 | 3.554533 |
| 17407435 | Lce1b   | late cornified envelope 1B                                 | 4.024697 | 3.943181 | 5.034994 | 3.889056 | 2.925047 | 4.024697 |
| 17399899 | Lce1c   | late cornified envelope 1C                                 | 3.46989  | 2.639894 | 3.009972 | 4.72682  | 2.71946  | 2.43628  |
| 17407444 | Lce1d   | late cornified envelope 1D                                 | 3.56334  | 3.484303 | 3.372761 | 3.418563 | 3.418563 | 3.885634 |
| 17407448 | Lce1e   | late cornified envelope 1E                                 | 3.344221 | 2.346743 | 2.233537 | 2.61105  | 2.782767 | 2.305932 |
| 17407452 | Lce1f   | late cornified envelope 1F                                 | 4.134836 | 5.939988 | 5.93686  | 3.842433 | 3.860827 | 4.055501 |
| 17407457 | Lce1g   | late cornified envelope 1G                                 | 2.132506 | 2.0075   | 2.251552 | 2.479244 | 2.241198 | 2.308171 |
| 17407461 | Lce1h   | late cornified envelope 1H                                 | 5.859388 | 4.681043 | 3.008282 | 4.681043 | 3.51745  | 3.623214 |
| 17407466 | Lce1i   | late cornified envelope 1I                                 | 2.101894 | 2.064611 | 2.365524 | 2.366476 | 1.854513 | 1.967072 |
| 17407471 | Lce1j   | late cornified envelope 1J                                 | 123.0184 | 124.7106 | 125.3284 | 111.4506 | 121.6228 | 117.5499 |
| 17407473 | Lce1k   | late cornified envelope 1K                                 | 2.147399 | 2.377112 | 2.252208 | 2.933392 | 2.238093 | 1.9438   |
| 17407481 | Lce1l   | late cornified envelope 1L                                 | 4.660452 | 2.527393 | 2.659804 | 2.341495 | 2.599402 | 2.504739 |
| 17407501 | Lce1m   | late cornified envelope 1M                                 | 3.050594 | 3.950787 | 3.426273 | 2.871352 | 2.430175 | 3.218258 |
| 17407489 | Lce3a   | late cornified envelope 3A                                 | 4.020653 | 3.460955 | 3.552316 | 3.417686 | 4.44311  | 2.710107 |
| 17399906 | Lce3b   | late cornified envelope 3B                                 | 2.387946 | 2.786743 | 2.953407 | 3.263862 | 2.188921 | 2.879304 |
| 17399910 | Lce3c   | late cornified envelope 3C                                 | 15.06188 | 23.2096  | 15.17085 | 14.64981 | 18.08724 | 13.09378 |
| 17399914 | Lce3d   | late cornified envelope 3D                                 | 23.26114 | 25.3473  | 23.42651 | 23.32896 | 36.24575 | 18.28755 |
| 17399917 | Lce3e   | late cornified envelope 3E                                 | 3.915075 | 2.794442 | 2.659804 | 2.126705 | 2.27365  | 2.659804 |
| 17399922 | Lce3f   | late cornified envelope 3F                                 | 2.406006 | 2.239691 | 2.285991 | 2.034015 | 2.458673 | 2.19439  |
| 17407426 | Lce6a   | late cornified envelope 6A                                 | 2.388161 | 2.426287 | 2.67402  | 2.606909 | 2.715824 | 2.897302 |

|          |          |                                                                                  |          |          |          |          |          |          |
|----------|----------|----------------------------------------------------------------------------------|----------|----------|----------|----------|----------|----------|
| 17407386 | Lelp1    | late cornified envelope-like proline-rich 1                                      | 2.856543 | 3.368485 | 3.374889 | 3.588547 | 3.458844 | 4.283203 |
| 17480978 | Lamtor1  | late endosomal/lysosomal adaptor, MAPK and MTOR activator 1                      | 27.09454 | 22.87453 | 21.9231  | 28.47038 | 28.71654 | 26.74431 |
| 17406817 | Lamtor2  | late endosomal/lysosomal adaptor, MAPK and MTOR activator 2                      | 27.468   | 28.68431 | 30.03952 | 30.96507 | 29.42315 | 27.10862 |
| 17403025 | Lamtor3  | late endosomal/lysosomal adaptor, MAPK and MTOR activator 3                      | 33.94507 | 34.39626 | 38.15235 | 33.91402 | 44.66213 | 49.54783 |
| 17443818 | Lamtor4  | late endosomal/lysosomal adaptor, MAPK and MTOR activator 4                      | 61.0276  | 56.25424 | 61.0276  | 61.48276 | 61.0276  | 63.21171 |
| 17401556 | Lamtor5  | late endosomal/lysosomal adaptor, MAPK and MTOR activator 5                      | 9.490407 | 9.761616 | 9.016453 | 8.640591 | 10.47479 | 10.54751 |
| 17339729 | Ltbp1    | latent transforming growth factor beta binding protein 1                         | 5.846001 | 6.494012 | 6.252703 | 7.008958 | 5.618987 | 6.987857 |
| 17282570 | Ltbp2    | latent transforming growth factor beta binding protein 2                         | 9.394589 | 7.953446 | 9.05108  | 8.466995 | 7.512224 | 8.823738 |
| 17356526 | Ltbp3    | latent transforming growth factor beta binding protein 3                         | 13.78436 | 13.78436 | 13.78436 | 12.543   | 11.87248 | 14.71872 |
| 17488179 | Ltbp4    | latent transforming growth factor beta binding protein 4                         | 25.25137 | 25.85641 | 28.37759 | 23.32783 | 22.25149 | 24.93966 |
| 17405737 | Lxn      | latexin                                                                          | 12.99919 | 11.29099 | 12.74571 | 14.56749 | 11.83567 | 12.97749 |
| 17526956 | Layn     | layilin                                                                          | 8.119608 | 6.65639  | 6.992896 | 7.291825 | 6.695492 | 5.56106  |
| 17357270 | Lbhd1    | LBH domain containing 1                                                          | 74.5874  | 56.67144 | 53.29285 | 66.65957 | 66.36129 | 62.63599 |
| 17381026 | Lime1    | Lck interacting transmembrane adaptor 1                                          | 11.24366 | 12.45869 | 13.4647  | 12.45869 | 11.88508 | 13.66932 |
| 17529290 | Lca5     | Leber congenital amaurosis 5 (human)                                             | 10.64165 | 10.87558 | 9.545164 | 10.86789 | 12.03021 | 11.59459 |
| 17332457 | Lca5l    | Leber congenital amaurosis 5-like                                                | 5.729543 | 4.801649 | 4.346548 | 4.999764 | 4.999764 | 4.999764 |
| 17512565 | Lcat     | lecithin cholesterol acyltransferase                                             | 704.9612 | 621.2155 | 610.1542 | 572.662  | 698.4389 | 571.6031 |
| 17406247 | Lrat     | lecithin-retinol acyltransferase (phosphatidylcholine-retinol-O-acyltransferase) | 49.82162 | 59.54919 | 40.67696 | 39.2081  | 27.09341 | 35.60604 |
| 17312829 | Lgals1   | lectin, galactose binding, soluble 1                                             | 54.31091 | 112.3285 | 131.3234 | 89.7444  | 66.16884 | 79.109   |
| 17362342 | Lgals12  | lectin, galactose binding, soluble 12                                            | 6.843622 | 4.471875 | 5.172458 | 6.73543  | 5.033807 | 5.965074 |
| 17299329 | Lgals3   | lectin, galactose binding, soluble 3                                             | 21.22364 | 27.18521 | 37.34388 | 21.191   | 19.89177 | 21.56186 |
| 17475989 | Lgals4   | lectin, galactose binding, soluble 4                                             | 12.69202 | 28.35851 | 27.15696 | 27.05006 | 19.18597 | 29.18914 |
| 17476001 | Lgals7   | lectin, galactose binding, soluble 7                                             | 5.403297 | 4.893986 | 4.771193 | 4.771193 | 4.695341 | 4.419429 |
| 17290629 | Lgals8   | lectin, galactose binding, soluble 8                                             | 215.8088 | 218.5682 | 233.429  | 231.093  | 222.3749 | 220.4137 |
| 17266520 | Lgals9   | lectin, galactose binding, soluble 9                                             | 1264.157 | 1409.277 | 1518.436 | 1296.494 | 1137.783 | 1255.521 |
| 17319091 | Lgals2   | lectin, galactose-binding, soluble 2                                             | 4.070568 | 3.104046 | 3.336811 | 3.431002 | 3.365241 | 3.076841 |
| 17260898 | Lgalsl   | lectin, galactoside binding-like                                                 | 17.72667 | 19.51566 | 20.55703 | 23.86261 | 27.25936 | 17.7913  |
| 17260907 | Lgalsl   | lectin, galactoside binding-like                                                 | 2.625096 | 2.824352 | 2.63929  | 2.433748 | 3.658646 | 2.544902 |
| 17272785 | Lgals3bp | lectin, galactoside-binding, soluble, 3 binding protein                          | 172.6313 | 212.7463 | 253.5752 | 201.6417 | 158.5331 | 164.8706 |
| 17527548 | Lman1l   | lectin, mannose-binding 1 like                                                   | 9.312768 | 9.209227 | 9.385477 | 9.121683 | 12.02571 | 10.04148 |
| 17292839 | Lman2    | lectin, mannose-binding 2                                                        | 216.7262 | 181.9515 | 188.4032 | 187.1615 | 193.8948 | 173.8947 |
| 17222179 | Lman2l   | lectin, mannose-binding 2-like                                                   | 24.91375 | 22.37181 | 23.99064 | 19.63696 | 26.47044 | 21.69845 |
| 17355092 | Lman1    | lectin, mannose-binding, 1                                                       | 483.7641 | 368.6429 | 377.6484 | 372.8212 | 396.1739 | 364.3421 |
| 17220214 | Lefty1   | left right determination factor 1                                                | 6.738185 | 7.579906 | 5.239757 | 6.055139 | 6.992896 | 8.420524 |
| 17220197 | Lefty2   | left-right determination factor 2                                                | 6.992896 | 7.034754 | 5.801597 | 9.495737 | 10.53195 | 8.420524 |
| 17283445 | Lgmn     | legumain                                                                         | 182.7161 | 249.067  | 267.0433 | 175.9986 | 169.3566 | 170.4601 |
| 17217596 | Lmod1    | leiomodulin 1 (smooth muscle)                                                    | 10.99237 | 9.287047 | 10.28871 | 9.582553 | 7.245976 | 10.37695 |
| 17456428 | Lmod2    | leiomodulin 2 (cardiac)                                                          | 7.870689 | 7.542067 | 8.469401 | 7.323991 | 6.545348 | 9.292199 |
| 17469360 | Lmod3    | leiomodulin 3 (fetal)                                                            | 4.214028 | 3.79579  | 4.630924 | 3.971324 | 3.4851   | 5.587179 |
| 17324971 | Lmln     | leishmanolysin-like (metallopeptidase M8 family)                                 | 8.634783 | 6.486679 | 9.316577 | 8.192706 | 9.411535 | 8.839655 |
| 17217160 | Lemd1    | LEM domain containing 1                                                          | 4.067437 | 5.167907 | 4.067437 | 3.725722 | 3.894748 | 4.067437 |
| 17342708 | Lemd2    | LEM domain containing 2                                                          | 23.66922 | 22.50338 | 21.13629 | 26.19483 | 22.20758 | 26.67729 |
| 17245448 | Lemd3    | LEM domain containing 3                                                          | 14.60732 | 23.3529  | 19.04249 | 22.19096 | 25.893   | 23.32815 |
| 17444464 | Lmtk2    | lemur tyrosine kinase 2                                                          | 51.46679 | 49.89454 | 48.65412 | 51.09428 | 46.02737 | 45.4469  |
| 17478010 | Lmtk3    | lemur tyrosine kinase 3                                                          | 7.128507 | 9.299286 | 8.636938 | 7.747334 | 9.657502 | 9.894796 |
| 17211533 | Lgsn     | lengsin, lens protein with glutamine synthetase domain                           | 4.20927  | 4.20927  | 4.20927  | 3.847977 | 4.061999 | 4.017199 |
| 17407086 | Lenep    | lens epithelial protein                                                          | 31.31235 | 30.16116 | 38.80606 | 29.13659 | 26.75618 | 31.57454 |
| 17407093 | Lenep    | lens epithelial protein                                                          | 27.18088 | 24.48218 | 34.64968 | 24.48218 | 24.42624 | 23.73839 |
| 17477089 | Lim2     | lens intrinsic membrane protein 2                                                | 4.01461  | 4.01461  | 4.117932 | 3.732675 | 4.177848 | 4.01461  |
| 17519509 | Leo1     | Leo1, Paf1/RNA polymerase II complex component, homolog (S. cerevisiae)          | 48.10383 | 43.81491 | 36.30182 | 39.23855 | 35.03099 | 43.06011 |
| 17456545 | Lep      | leptin                                                                           | 3.541008 | 3.494776 | 3.933872 | 3.787485 | 2.518911 | 3.838919 |
| 17415979 | Lepr     | leptin receptor                                                                  | 42.97334 | 104.0591 | 186.7909 | 80.27284 | 100.9901 | 92.26042 |
| 17415973 | Leprot   | leptin receptor overlapping transcript                                           | 39.56629 | 62.22791 | 66.55661 | 56.82564 | 68.77537 | 58.7656  |
| 17508722 | Leprotl1 | leptin receptor overlapping transcript-like 1                                    | 69.2403  | 71.10603 | 64.52338 | 64.52338 | 83.70257 | 64.52338 |
| 17250475 | Llg1     | lethal giant larvae homolog 1 (Drosophila)                                       | 13.321   | 14.50803 | 15.35365 | 14.43941 | 13.19482 | 14.23578 |
| 17258341 | Llg2     | lethal giant larvae homolog 2 (Drosophila)                                       | 49.43188 | 45.41667 | 53.77561 | 47.19264 | 41.14057 | 46.20605 |
| 17493238 | l7Rn6    | lethal, Chr 7, Rinchik 6                                                         | 42.6839  | 33.83654 | 32.11443 | 40.01752 | 27.83619 | 36.16043 |
| 17315033 | Letmd1   | LETM1 domain containing 1                                                        | 73.32229 | 84.12251 | 80.65768 | 90.09468 | 77.90694 | 75.50394 |
| 17437247 | Lap3     | leucine aminopeptidase 3                                                         | 556.3928 | 568.2689 | 573.357  | 536.1043 | 453.447  | 503.9127 |
| 17482884 | Lcmt1    | leucine carboxyl methyltransferase 1                                             | 23.88793 | 23.65445 | 24.68495 | 25.04395 | 21.18234 | 21.84816 |
| 17390424 | Lcmt2    | leucine carboxyl methyltransferase 2                                             | 15.07713 | 16.29141 | 14.37978 | 15.02195 | 14.30483 | 16.28961 |
| 17428582 | Lurap1   | leucine rich adaptor protein 1                                                   | 6.060765 | 6.145243 | 6.096791 | 6.063497 | 6.314156 | 6.575816 |
| 17414984 | Lurap1l  | leucine rich adaptor protein 1-like                                              | 88.73922 | 101.7666 | 71.27084 | 71.63933 | 80.55823 | 96.32377 |
| 17440521 | Lrcol1   | leucine rich colipase-like 1                                                     | 4.01461  | 3.68195  | 4.20927  | 4.20927  | 4.053224 | 4.20927  |
| 17215650 | Lrrfp1   | leucine rich repeat (in FLII) interacting protein 1                              | 37.38221 | 33.20365 | 44.81128 | 35.88627 | 44.65903 | 41.43046 |
| 17522577 | Lrrfp2   | leucine rich repeat (in FLII) interacting protein 2                              | 75.98854 | 75.56834 | 83.50496 | 78.51628 | 86.44197 | 83.92217 |
| 17396106 | Lrrcc1   | leucine rich repeat and coiled-coil domain containing 1                          | 5.752185 | 6.104571 | 6.537278 | 5.629903 | 6.298988 | 5.73948  |
| 17475851 | Lrfn1    | leucine rich repeat and fibronectin type III domain containing 1                 | 6.764719 | 5.552856 | 6.140133 | 6.154749 | 5.119348 | 7.786905 |
| 17338460 | Lrfn2    | leucine rich repeat and fibronectin type III domain containing 2                 | 8.83206  | 7.611074 | 7.488932 | 6.715664 | 6.666179 | 8.060783 |
| 17489039 | Lrfn3    | leucine rich repeat and fibronectin type III domain containing 3                 | 14.57749 | 11.03986 | 22.06075 | 12.68463 | 11.03986 | 6.285293 |
| 17361304 | Lrfn4    | leucine rich repeat and fibronectin type III domain containing 4                 | 9.387233 | 11.0643  | 15.05426 | 11.83387 | 9.310251 | 11.23104 |
| 17275756 | Lrfn5    | leucine rich repeat and fibronectin type III domain containing 5                 | 3.08378  | 3.624344 | 3.079957 | 3.843578 | 4.267437 | 3.354459 |
| 17444047 | Elf1     | leucine rich repeat and fibronectin type III, extracellular 1                    | 10.0483  | 10.64999 | 10.66876 | 9.902687 | 12.18446 | 9.21951  |
| 17319045 | Elf2     | leucine rich repeat and fibronectin type III, extracellular 2                    | 9.709655 | 12.08043 | 11.04537 | 12.73467 | 12.23227 | 9.973708 |
| 17527445 | Lingo1   | leucine rich repeat and Ig domain containing 1                                   | 5.673897 | 7.554834 | 8.071574 | 7.329526 | 6.076919 | 6.50266  |
| 17423939 | Lingo2   | leucine rich repeat and Ig domain containing 2                                   | 3.913312 | 3.78444  | 3.856681 | 3.730942 | 4.115649 | 3.400319 |
| 17243113 | Lingo3   | leucine rich repeat and Ig domain containing 3                                   | 11.08925 | 11.87701 | 13.51613 | 12.52562 | 12.97336 | 14.36733 |
| 17400066 | Lingo4   | leucine rich repeat and Ig domain containing 4                                   | 8.039691 | 9.276689 | 11.10664 | 10.15677 | 13.11122 | 9.20023  |
| 17384049 | Lrsam1   | leucine rich repeat and sterile alpha motif containing 1                         | 14.83672 | 14.03892 | 14.54882 | 14.83672 | 13.58771 | 16.56608 |
| 17528963 | Lrrc1    | leucine rich repeat containing 1                                                 | 5.637713 | 4.259399 | 3.942553 | 5.501176 | 5.604012 | 4.813479 |
| 17237537 | Lrrc10   | leucine rich repeat containing 10                                                | 7.543427 | 7.398075 | 5.519892 | 6.56525  | 8.829428 | 6.992896 |
| 17362671 | Lrrc10b  | leucine rich repeat containing 10B                                               | 4.811144 | 5.150884 | 6.323705 | 4.266816 | 6.47132  | 5.42811  |
| 17312589 | Lrrc14   | leucine rich repeat containing 14                                                | 6.992896 | 10.56126 | 10.1025  | 8.361895 | 8.415564 | 11.11387 |
| 17294397 | Lrrc14b  | leucine rich repeat containing 14B                                               | 12.52067 | 11.8029  | 13.39423 | 13.26589 | 10.64128 | 10.79881 |

|          |            |                                                                                 |          |          |          |          |          |          |
|----------|------------|---------------------------------------------------------------------------------|----------|----------|----------|----------|----------|----------|
| 17329631 | Lrrc15     | leucine rich repeat containing 15                                               | 5.405582 | 6.025037 | 5.25405  | 4.940955 | 4.310843 | 5.40311  |
| 17291275 | Lrrc16a    | leucine rich repeat containing 16A                                              | 20.27388 | 20.36853 | 15.40279 | 21.58833 | 13.72182 | 14.85308 |
| 17300441 | Lrrc16b    | leucine rich repeat containing 16B                                              | 13.62987 | 13.62987 | 13.50901 | 13.2343  | 13.04351 | 14.92946 |
| 17435107 | Lrrc17     | leucine rich repeat containing 17                                               | 6.171709 | 5.93106  | 7.265943 | 7.023694 | 6.171709 | 8.255582 |
| 17298642 | Lrrc18     | leucine rich repeat containing 18                                               | 4.724134 | 5.98006  | 6.161365 | 6.681028 | 5.490091 | 5.617663 |
| 17427262 | Lrrc19     | leucine rich repeat containing 19                                               | 3.462322 | 3.462322 | 3.382406 | 3.287635 | 3.027842 | 4.073814 |
| 17522536 | Lrrc2      | leucine rich repeat containing 2                                                | 3.852033 | 4.000749 | 4.501107 | 4.497396 | 3.922192 | 4.013553 |
| 17233708 | Lrrc20     | leucine rich repeat containing 20                                               | 15.83637 | 24.84218 | 31.32885 | 25.31218 | 23.75518 | 12.42445 |
| 17470867 | Lrrc23     | leucine rich repeat containing 23                                               | 3.729055 | 3.729055 | 4.147207 | 3.729055 | 3.729055 | 5.109492 |
| 17318695 | Lrrc24     | leucine rich repeat containing 24                                               | 9.73668  | 8.22189  | 8.467112 | 8.721825 | 9.26949  | 11.58969 |
| 17501989 | Lrrc25     | leucine rich repeat containing 25                                               | 13.2047  | 11.74748 | 12.15148 | 12.04131 | 9.602034 | 10.49267 |
| 17367916 | Lrrc26     | leucine rich repeat containing 26                                               | 9.265251 | 11.01937 | 8.78596  | 8.705336 | 10.52727 | 9.148277 |
| 17484353 | Lrrc27     | leucine rich repeat containing 27                                               | 7.232327 | 7.182271 | 6.639709 | 7.16025  | 7.092774 | 7.391771 |
| 17491999 | Lrrc28     | leucine rich repeat containing 28                                               | 40.25455 | 47.85607 | 54.02518 | 39.83598 | 37.79229 | 33.65572 |
| 17512381 | Lrrc29     | leucine rich repeat containing 29                                               | 30.21787 | 30.12794 | 28.29451 | 30.73456 | 25.45646 | 21.75432 |
| 17242330 | Lrrc3      | leucine rich repeat containing 3                                                | 79.32974 | 68.67866 | 83.80707 | 84.00481 | 83.56518 | 82.66186 |
| 17346894 | Lrrc30     | leucine rich repeat containing 30                                               | 5.270866 | 5.919971 | 5.195023 | 5.270866 | 4.124245 | 5.270866 |
| 17404534 | Lrrc31     | leucine rich repeat containing 31                                               | 2.896077 | 3.400154 | 3.705761 | 5.202157 | 3.64614  | 5.126059 |
| 17480485 | Lrrc32     | leucine rich repeat containing 32                                               | 31.50917 | 29.9871  | 33.49445 | 24.2355  | 16.93458 | 16.69842 |
| 17404520 | Lrrc34     | leucine rich repeat containing 34                                               | 2.408041 | 3.008741 | 2.421599 | 2.625842 | 3.507371 | 2.152898 |
| 17504811 | Lrrc36     | leucine rich repeat containing 36                                               | 3.062139 | 3.299277 | 4.071668 | 4.625823 | 4.379512 | 3.352227 |
| 17270523 | Lrrc37a    | leucine rich repeat containing 37A                                              | 2.813898 | 2.662497 | 2.540478 | 2.747863 | 2.802356 | 2.518317 |
| 17421174 | Lrrc38     | leucine rich repeat containing 38                                               | 6.615407 | 6.338933 | 5.880749 | 4.343566 | 5.74545  | 5.628459 |
| 17402039 | Lrrc39     | leucine rich repeat containing 39                                               | 5.937312 | 7.085354 | 8.18771  | 7.469336 | 5.545471 | 5.982962 |
| 17303593 | Lrrc3b     | leucine rich repeat containing 3B                                               | 3.500085 | 3.397073 | 3.70553  | 3.384986 | 3.339703 | 3.339703 |
| 17256066 | Lrrc3c     | leucine rich repeat containing 3C                                               | 19.81705 | 19.65439 | 18.78071 | 16.76186 | 15.45284 | 16.85822 |
| 17465332 | Lrrc4      | leucine rich repeat containing 4                                                | 5.338965 | 5.165257 | 3.561611 | 4.20927  | 5.27357  | 4.565871 |
| 17403895 | Lrrc40     | leucine rich repeat containing 40                                               | 28.09322 | 27.22896 | 29.08735 | 27.95646 | 26.65233 | 26.57707 |
| 17417349 | Lrrc41     | leucine rich repeat containing 41                                               | 40.82554 | 29.97089 | 30.27867 | 30.43522 | 27.60849 | 31.53583 |
| 17427917 | Lrrc42     | leucine rich repeat containing 42                                               | 28.18352 | 33.23727 | 29.37486 | 24.54862 | 30.6278  | 27.68457 |
| 17442307 | Lrrc43     | leucine rich repeat containing 43                                               | 4.064985 | 5.048483 | 5.487466 | 5.417736 | 4.861866 | 5.56106  |
| 17259475 | Lrrc45     | leucine rich repeat containing 45                                               | 17.43422 | 16.48258 | 18.20093 | 19.29025 | 21.57951 | 20.35371 |
| 17268430 | Lrrc46     | leucine rich repeat containing 46                                               | 17.3294  | 15.19822 | 11.01823 | 13.37215 | 15.0901  | 17.93455 |
| 17422302 | Lrrc47     | leucine rich repeat containing 47                                               | 27.02514 | 24.7007  | 17.97052 | 21.42183 | 28.33592 | 24.16672 |
| 17250344 | Lrrc48     | leucine rich repeat containing 48                                               | 5.93069  | 6.953118 | 5.347335 | 5.933363 | 6.133795 | 6.079278 |
| 17527883 | Lrrc49     | leucine rich repeat containing 49                                               | 8.626229 | 8.170079 | 7.264482 | 8.535644 | 5.594464 | 7.410701 |
| 17477468 | Lrrc4b     | leucine rich repeat containing 4B                                               | 16.23843 | 17.33    | 17.72778 | 18.14651 | 14.31296 | 17.81289 |
| 17373616 | Lrrc4c     | leucine rich repeat containing 4C                                               | 4.233527 | 3.806698 | 3.441053 | 3.249167 | 3.147552 | 2.986964 |
| 17493980 | Lrrc51     | leucine rich repeat containing 51                                               | 22.92071 | 20.84978 | 20.62597 | 19.25151 | 16.32555 | 20.27092 |
| 17229412 | Lrrc52     | leucine rich repeat containing 52                                               | 7.930325 | 8.359925 | 7.874182 | 7.250096 | 8.98202  | 7.28844  |
| 17387565 | Lrrc55     | leucine rich repeat containing 55                                               | 4.752643 | 3.191866 | 2.982061 | 2.787071 | 3.152552 | 3.743921 |
| 17484771 | Lrrc56     | leucine rich repeat containing 56                                               | 6.866239 | 9.045749 | 9.428903 | 9.848336 | 7.589685 | 9.240494 |
| 17390249 | Lrrc57     | leucine rich repeat containing 57                                               | 19.19103 | 18.38261 | 16.37258 | 16.91651 | 21.74422 | 15.73102 |
| 17325533 | Lrrc58     | leucine rich repeat containing 58                                               | 155.5894 | 146.3714 | 138.8468 | 135.5978 | 110.9149 | 108.8562 |
| 17255232 | Lrrc59     | leucine rich repeat containing 59                                               | 187.8347 | 142.9672 | 151.7634 | 147.22   | 155.8582 | 127.3584 |
| 17317608 | Lrrc6      | leucine rich repeat containing 6 (testis)                                       | 3.062691 | 2.953407 | 3.142385 | 2.606909 | 3.03507  | 3.185059 |
| 17458315 | Lrrc61     | leucine rich repeat containing 61                                               | 16.24338 | 13.26626 | 15.96289 | 13.82244 | 11.54911 | 11.25107 |
| 17308656 | Lrrc63     | leucine rich repeat containing 63                                               | 2.640608 | 2.276378 | 2.481049 | 2.459167 | 2.784137 | 2.681221 |
| 17448832 | Lrrc66     | leucine rich repeat containing 66                                               | 6.992896 | 5.576887 | 7.317902 | 6.992896 | 8.894108 | 4.886969 |
| 17423422 | Lrrc69     | leucine rich repeat containing 69                                               | 2.556695 | 2.6639   | 2.805193 | 2.682912 | 3.408554 | 2.153346 |
| 17411457 | Lrrc7      | leucine rich repeat containing 7                                                | 3.062691 | 2.918223 | 3.009972 | 3.027653 | 3.152246 | 3.177627 |
| 17406531 | Lrrc71     | leucine rich repeat containing 71                                               | 8.391158 | 8.072357 | 7.321961 | 7.698994 | 6.302351 | 9.766083 |
| 17280774 | Lrrc72     | leucine rich repeat containing 72                                               | 2.551596 | 2.493341 | 2.764484 | 2.260466 | 2.458673 | 2.120611 |
| 17338059 | Lrrc73     | leucine rich repeat containing 73                                               | 6.920182 | 7.698994 | 7.698994 | 8.064136 | 9.723933 | 7.826786 |
| 17277534 | Lrrc74a    | leucine rich repeat containing 74A                                              | 7.132461 | 5.830784 | 5.992924 | 6.171709 | 6.443658 | 6.296936 |
| 17328728 | Lrrc74b    | leucine rich repeat containing 74B                                              | 5.494735 | 6.318622 | 5.766436 | 5.65807  | 4.999417 | 5.77848  |
| 17264046 | Lrrc75a    | leucine rich repeat containing 75A                                              | 12.97884 | 12.26393 | 12.02579 | 12.00564 | 14.17916 | 13.33134 |
| 17250750 | Lrrc75aos1 | leucine rich repeat containing 75A, opposite strand 1 [Source:MGI Symbol;Acc:MG | 5.704024 | 5.084761 | 4.858093 | 5.084761 | 6.331205 |          |
| 17250746 | Lrrc75aos2 | leucine rich repeat containing 75A, opposite strand 2 [Source:MGI Symbol;Acc:MG | 10.14741 | 9.981316 | 10.05255 | 8.474745 | 8.474745 | 8.616906 |
| 17241840 | Lrrc75b    | leucine rich repeat containing 75B                                              | 7.76061  | 8.941581 | 8.347591 | 7.590579 | 7.073283 | 9.038228 |
| 17439901 | Lrrc8b     | leucine rich repeat containing 8 family, member B                               | 6.171709 | 7.177194 | 7.050717 | 5.885928 | 6.296849 | 6.335024 |
| 17439909 | Lrrc8c     | leucine rich repeat containing 8 family, member C                               | 20.9615  | 22.50603 | 24.04592 | 22.30306 | 19.73275 | 13.06975 |
| 17498786 | Lrrc8e     | leucine rich repeat containing 8 family, member E                               | 6.591469 | 6.994447 | 6.591469 | 7.095282 | 5.342852 | 7.6959   |
| 17369126 | Lrrc8a     | leucine rich repeat containing 8A                                               | 67.12043 | 73.84509 | 90.17527 | 71.17161 | 77.71763 | 60.98785 |
| 17439922 | Lrrc8d     | leucine rich repeat containing 8D                                               | 13.44642 | 13.71421 | 14.53279 | 14.36633 | 15.48264 | 14.44702 |
| 17450529 | Lrrc8dos   | leucine rich repeat containing 8D, opposite strand [Source:MGI Symbol;Acc:MG    | 5.086065 | 4.508476 | 4.695439 | 5.215878 | 4.746519 | 5.150063 |
| 17276192 | Lrrc9      | leucine rich repeat containing 9                                                | 3.703322 | 3.170829 | 3.708819 | 3.696142 | 3.703322 | 3.703322 |
| 17245059 | Lgr5       | leucine rich repeat containing G protein coupled receptor 5                     | 14.58517 | 12.13549 | 11.43703 | 10.83712 | 11.61752 | 14.83867 |
| 17392047 | Lrrn4      | leucine rich repeat neuronal 4                                                  | 5.410493 | 5.925677 | 6.940021 | 5.453151 | 5.905258 | 6.283551 |
| 17275875 | Lrr1       | leucine rich repeat protein 1                                                   | 2.947455 | 2.656101 | 2.672815 | 2.636749 | 2.353504 | 2.725309 |
| 17461330 | Lrrn1      | leucine rich repeat protein 1, neuronal                                         | 3.322041 | 3.208369 | 3.267144 | 3.263862 | 3.66644  | 3.512163 |
| 17217241 | Lrrn2      | leucine rich repeat protein 2, neuronal                                         | 17.67674 | 20.98825 | 20.39537 | 22.23931 | 19.21698 | 20.39537 |
| 17280888 | Lrrn3      | leucine rich repeat protein 3, neuronal                                         | 6.030928 | 6.578734 | 4.853212 | 7.505561 | 6.030928 | 5.342926 |
| 17459735 | Lrrtm1     | leucine rich repeat transmembrane neuronal 1                                    | 4.946952 | 5.352749 | 6.534288 | 5.796612 | 4.793236 | 5.232535 |
| 17353581 | Lrrtm2     | leucine rich repeat transmembrane neuronal 2                                    | 4.271788 | 6.084126 | 4.864259 | 5.684762 | 5.53027  | 5.253213 |
| 17241604 | Lrrtm3     | leucine rich repeat transmembrane neuronal 3                                    | 4.97929  | 4.995538 | 4.710891 | 4.801649 | 5.306351 | 4.801649 |
| 17459786 | Lrrtm4     | leucine rich repeat transmembrane neuronal 4                                    | 3.157385 | 3.061163 | 3.150673 | 3.116161 | 3.551651 | 3.340074 |
| 17434404 | Lrrd1      | leucine rich repeats and death domain containing 1                              | 2.83459  | 2.395057 | 2.333604 | 2.234404 | 2.133497 | 2.865188 |
| 17421807 | Lzic       | leucine zipper and CTNBP1 domain containing                                     | 14.03814 | 17.09663 | 19.45623 | 15.05677 | 15.86153 | 15.57737 |
| 17420125 | Luzp1      | leucine zipper protein 1                                                        | 18.20875 | 20.24551 | 17.83884 | 22.53897 | 17.08585 | 19.62839 |
| 17478496 | Luzp2      | leucine zipper protein 2                                                        | 3.543758 | 3.09908  | 3.354087 | 3.117479 | 2.887918 | 3.158545 |
| 17538495 | Luzp4      | leucine zipper protein 4                                                        | 5.425402 | 4.319128 | 4.209036 | 4.67848  | 6.252573 | 5.621441 |
| 17532526 | Lztlf1     | leucine zipper transcription factor-like 1                                      | 18.07383 | 18.2892  | 14.98046 | 16.62336 | 19.03299 | 17.69684 |
| 17535148 | Ldoc1      | leucine zipper, down-regulated in cancer 1                                      | 8.163852 | 6.907961 | 8.327769 | 6.825336 | 6.992896 | 10.29299 |

|          |              |                                                                                  |          |          |          |          |          |          |
|----------|--------------|----------------------------------------------------------------------------------|----------|----------|----------|----------|----------|----------|
| 17319989 | Ldoc1l       | leucine zipper, down-regulated in cancer 1-like                                  | 4.20927  | 4.106047 | 4.20927  | 4.478607 | 4.20927  | 4.053758 |
| 17509801 | Lzts1        | leucine zipper, putative tumor suppressor 1                                      | 10.58508 | 12.46672 | 12.0464  | 11.93776 | 10.76271 | 13.07582 |
| 17509806 | Lzts1        | leucine zipper, putative tumor suppressor 1                                      | 3.681235 | 3.84699  | 3.237028 | 4.09553  | 4.798621 | 4.042618 |
| 17359796 | Lzts2        | leucine zipper, putative tumor suppressor 2                                      | 14.15765 | 16.10158 | 18.02616 | 20.69284 | 13.9461  | 19.21925 |
| 17391683 | Lzts3        | leucine zipper, putative tumor suppressor family member 3                        | 11.46512 | 16.27979 | 16.37951 | 18.24185 | 20.05403 | 22.76097 |
| 17447150 | Letm1        | leucine zipper-EF-hand containing transmembrane protein 1                        | 107.4841 | 92.35576 | 90.56992 | 109.0942 | 78.10538 | 93.18721 |
| 17508380 | Letm2        | leucine zipper-EF-hand containing transmembrane protein 2                        | 18.74079 | 19.3489  | 29.80164 | 19.47674 | 22.75545 | 24.96509 |
| 17398095 | Lekr1        | leucine, glutamate and lysine rich 1                                             | 3.210838 | 3.604302 | 3.22422  | 3.25575  | 3.518157 | 3.218013 |
| 17346150 | Lrg1         | leucine-rich alpha-2-glycoprotein 1                                              | 537.6748 | 585.8794 | 646.7615 | 444.685  | 728.3257 | 383.478  |
| 17347751 | Lrpprc       | leucine-rich PPR-motif containing                                                | 184.4595 | 168.8912 | 152.8603 | 185.8635 | 155.2963 | 171.2618 |
| 17239257 | LOC105245161 | leucine-rich repeat extensin-like protein 5                                      | 3.830519 | 4.106872 | 3.883991 | 5.26247  | 3.291465 | 3.636272 |
| 17491898 | Lrrk1        | leucine-rich repeat kinase 1                                                     | 23.24019 | 21.77469 | 20.8323  | 20.05097 | 20.90708 | 17.52473 |
| 17314260 | Lrrk2        | leucine-rich repeat kinase 2                                                     | 6.825809 | 8.02021  | 6.559655 | 8.234779 | 7.229972 | 6.763641 |
| 17359143 | Lgi1         | leucine-rich repeat LGI family, member 1                                         | 2.529514 | 3.605002 | 2.81037  | 2.480619 | 2.994593 | 2.882519 |
| 17448064 | Lgi2         | leucine-rich repeat LGI family, member 2                                         | 3.462322 | 3.658976 | 3.729055 | 3.700371 | 3.729055 | 4.406032 |
| 17301746 | Lgi3         | leucine-rich repeat LGI family, member 3                                         | 6.299075 | 8.039468 | 6.992896 | 7.985983 | 4.59884  | 7.732259 |
| 17476578 | Lgi4         | leucine-rich repeat LGI family, member 4                                         | 5.175865 | 4.04716  | 4.614038 | 5.836567 | 5.557014 | 4.393346 |
| 17298910 | Lrit1        | leucine-rich repeat, immunoglobulin-like and transmembrane domains 1             | 26.18176 | 31.89061 | 23.77692 | 27.42786 | 25.28518 | 33.77608 |
| 17298917 | Lrit2        | leucine-rich repeat, immunoglobulin-like and transmembrane domains 2             | 5.864386 | 6.171709 | 6.287864 | 5.410343 | 6.171709 | 7.208055 |
| 17410306 | Lrit3        | leucine-rich repeat, immunoglobulin-like and transmembrane domains 3             | 4.030615 | 4.343867 | 4.403528 | 5.00219  | 4.800451 | 4.844138 |
| 17374098 | Lgr4         | leucine-rich repeat-containing G protein-coupled receptor 4                      | 111.1381 | 123.0875 | 126.6269 | 113.6395 | 135.4278 | 126.6532 |
| 17227198 | Lgr6         | leucine-rich repeat-containing G protein-coupled receptor 6                      | 9.037101 | 10.31241 | 11.71057 | 10.14685 | 7.247985 | 10.15529 |
| 17308626 | Lrch1        | leucine-rich repeats and calponin homology (CH) domain containing 1              | 23.27566 | 28.56111 | 28.29372 | 27.20632 | 26.20899 | 23.95459 |
| 17545199 | Lrch2        | leucine-rich repeats and calponin homology (CH) domain containing 2              | 5.120306 | 5.120306 | 5.120306 | 5.526362 | 5.120306 | 4.617558 |
| 17324932 | Lrch3        | leucine-rich repeats and calponin homology (CH) domain containing 3              | 27.08552 | 39.00535 | 35.77798 | 33.50582 | 42.69455 | 32.40647 |
| 17457092 | Lrguk        | leucine-rich repeats and guanylate kinase domain containing                      | 3.516816 | 3.438645 | 3.516816 | 3.614359 | 3.516816 | 3.332235 |
| 17469217 | Lrig1        | leucine-rich repeats and immunoglobulin-like domains 1                           | 49.00136 | 34.67514 | 40.9335  | 30.6586  | 31.19429 | 36.27038 |
| 17408729 | Lrig2        | leucine-rich repeats and immunoglobulin-like domains 2                           | 12.78739 | 17.12141 | 16.18864 | 15.23914 | 17.11679 | 15.23914 |
| 17237811 | Lrig3        | leucine-rich repeats and immunoglobulin-like domains 3                           | 27.93458 | 24.50663 | 25.68457 | 28.68212 | 27.87037 | 24.20327 |
| 17244623 | Lriq1        | leucine-rich repeats and IQ motif containing 1                                   | 3.555913 | 2.890422 | 3.192729 | 2.820831 | 2.911051 | 2.952833 |
| 17403811 | Lriq3        | leucine-rich repeats and IQ motif containing 3                                   | 7.870689 | 4.059185 | 5.617429 | 7.582639 | 5.021645 | 5.352712 |
| 17396564 | Lriq4        | leucine-rich repeats and IQ motif containing 4                                   | 3.28308  | 3.058258 | 2.93384  | 3.406783 | 3.461938 | 3.362187 |
| 17298126 | Lrtm1        | leucine-rich repeats and transmembrane domains 1                                 | 13.78426 | 10.07348 | 11.9539  | 10.52428 | 22.02546 | 18.4205  |
| 17470291 | Lrtm2        | leucine-rich repeats and transmembrane domains 2                                 | 7.163973 | 7.34733  | 10.24523 | 6.271932 | 10.03098 | 7.608067 |
| 17453679 | Lrwd1        | leucine-rich repeats and WD repeat domain containing 1                           | 16.76104 | 17.72434 | 18.18176 | 14.31296 | 17.55828 | 14.38646 |
| 17280836 | Lsmem1       | leucine-rich single-pass membrane protein 1                                      | 4.68679  | 5.046034 | 7.116313 | 5.210566 | 5.310398 | 4.20927  |
| 17530923 | Lsmem2       | leucine-rich single-pass membrane protein 2                                      | 4.322872 | 5.106837 | 4.772053 | 4.437816 | 4.231825 | 4.699509 |
| 17323503 | Lztr1        | leucine-zipper-like transcriptional regulator, 1                                 | 48.54598 | 50.56475 | 46.46685 | 52.11981 | 45.69391 | 39.79403 |
| 17341247 | Lnpep        | leucyl/cystinyl aminopeptidase                                                   | 78.61812 | 94.74185 | 118.0431 | 93.49712 | 99.10047 | 112.9875 |
| 17354036 | Lars         | leucyl-tRNA synthetase                                                           | 49.75743 | 44.41915 | 46.83548 | 49.75743 | 58.95491 | 42.56011 |
| 17523574 | Lars2        | leucyl-tRNA synthetase, mitochondrial                                            | 44.42192 | 40.58065 | 40.41979 | 40.23558 | 29.61241 | 36.19328 |
| 17246810 | Lif          | leukemia inhibitory factor                                                       | 5.815487 | 6.287864 | 6.287864 | 6.310525 | 6.287864 | 5.952394 |
| 17310044 | Lifr         | leukemia inhibitory factor receptor                                              | 250.7594 | 191.727  | 198.0938 | 256.412  | 219.4289 | 219.3316 |
| 17331088 | Lnp1         | leukemia NUP98 fusion partner 1                                                  | 5.338965 | 4.746256 | 5.393194 | 7.719728 | 5.854111 | 5.522265 |
| 17308928 | Lect1        | leukocyte cell derived chemotaxin 1                                              | 4.572268 | 4.73978  | 5.472765 | 5.85407  | 5.561215 | 5.46098  |
| 17293020 | Lect2        | leukocyte cell-derived chemotaxin 2                                              | 114.9275 | 90.20403 | 86.0856  | 113.167  | 122.428  | 182.7262 |
| 17473292 | Lilra5       | leukocyte immunoglobulin-like receptor, subfamily A (with TM domain), member 1   | 9.487908 | 10.67164 | 12.12867 | 9.490473 | 10.14587 | 10.71055 |
| 17233226 | Lilrb4a      | leukocyte immunoglobulin-like receptor, subfamily B, member 4A                   | 55.93774 | 82.62807 | 112.4446 | 69.49465 | 64.12078 | 51.54284 |
| 17233210 | Lilrb4b      | leukocyte immunoglobulin-like receptor, subfamily B, member 4B                   | 3.592505 | 6.385148 | 9.766692 | 5.825452 | 4.681984 | 5.532724 |
| 17485545 | Leng1        | leukocyte receptor cluster (LRC) member 1                                        | 14.31236 | 19.16325 | 15.96322 | 16.45974 | 21.34254 | 18.82033 |
| 17473269 | Leng8        | leukocyte receptor cluster (LRC) member 8                                        | 49.18341 | 67.95086 | 71.01737 | 58.78556 | 61.84907 | 63.15303 |
| 17485702 | Leng9        | leukocyte receptor cluster (LRC) member 9                                        | 21.20482 | 11.98934 | 11.50102 | 10.32207 | 7.595527 | 7.7633   |
| 17344303 | Lst1         | leukocyte specific transcript 1                                                  | 5.730655 | 7.169189 | 8.055868 | 5.851514 | 5.804292 | 7.169189 |
| 17389938 | Ltk          | leukocyte tyrosine kinase                                                        | 9.783699 | 10.01673 | 9.875816 | 11.39793 | 9.489881 | 11.45353 |
| 17485673 | Lair1        | leukocyte-associated Ig-like receptor 1                                          | 17.91554 | 20.68639 | 18.57744 | 17.18729 | 19.72154 | 15.0456  |
| 17236531 | Lta4h        | leukotriene A4 hydrolase                                                         | 69.21391 | 56.62707 | 60.76126 | 66.1803  | 56.02233 | 56.49103 |
| 17300666 | Ltb4r1       | leukotriene B4 receptor 1                                                        | 4.053927 | 4.464938 | 4.22002  | 4.79018  | 4.084105 | 5.061482 |
| 17300663 | Ltb4r2       | leukotriene B4 receptor 2                                                        | 13.39423 | 13.67217 | 12.33358 | 17.20183 | 12.4416  | 13.24238 |
| 17262316 | Ltc4s        | leukotriene C4 synthase                                                          | 6.992896 | 6.288169 | 9.033907 | 7.277283 | 7.277283 | 7.277283 |
| 17357872 | Lpxn         | leupaxin                                                                         | 9.205525 | 9.685993 | 10.17347 | 8.075883 | 8.184986 | 7.798572 |
| 17444106 | Lfng         | LFNG O-fucosylpeptide 3-beta-N-acetylglucosaminyltransferase                     | 27.96034 | 30.32257 | 36.43821 | 33.96013 | 26.45026 | 31.30302 |
| 17359436 | Lcor         | ligand dependent nuclear receptor corepressor                                    | 84.28009 | 102.4496 | 83.57387 | 82.60401 | 70.14848 | 76.93456 |
| 17359449 | Lcor         | ligand dependent nuclear receptor corepressor                                    | 19.87744 | 17.56949 | 21.93344 | 20.20541 | 17.48057 | 16.91663 |
| 17359454 | Lcor         | ligand dependent nuclear receptor corepressor                                    | 7.12026  | 8.51685  | 9.403905 | 8.51685  | 7.545204 | 8.934333 |
| 17447940 | Lcorl        | ligand dependent nuclear receptor corepressor-like                               | 25.33816 | 19.28143 | 21.73533 | 18.24678 | 22.31188 | 22.21481 |
| 17401514 | Lrif1        | ligand dependent nuclear receptor interacting factor 1                           | 28.74024 | 24.9324  | 27.16825 | 28.29451 | 26.27812 | 26.56104 |
| 17448880 | Lnx1         | ligand of numb-protein X 1                                                       | 7.531776 | 7.698994 | 5.879445 | 7.644012 | 8.166116 | 7.320438 |
| 17455281 | Lnx2         | ligand of numb-protein X 2                                                       | 73.98444 | 50.335   | 42.01871 | 46.87153 | 42.97274 | 34.52525 |
| 17473856 | Lig1         | ligase I, DNA, ATP-dependent                                                     | 20.38082 | 13.90787 | 18.326   | 12.8975  | 14.63418 | 16.22481 |
| 17254093 | Lig3         | ligase III, DNA, ATP-dependent                                                   | 51.34885 | 36.9228  | 40.98829 | 49.16126 | 52.26235 | 40.47474 |
| 17507355 | Lig4         | ligase IV, DNA, ATP-dependent                                                    | 14.01918 | 11.50644 | 11.93387 | 12.61904 | 9.098634 | 11.22388 |
| 17510586 | Large        | like-glycosyltransferase                                                         | 17.34611 | 17.53809 | 18.49649 | 18.16312 | 12.75508 | 11.04935 |
| 17437887 | Limch1       | LIM and calponin homology domains 1                                              | 5.026869 | 5.617429 | 5.730973 | 4.553134 | 6.05023  | 7.198468 |
| 17461477 | Lmcd1        | LIM and cysteine-rich domains 1                                                  | 5.411843 | 7.237091 | 7.370027 | 6.767486 | 7.131967 | 7.186703 |
| 17349209 | Lims2        | LIM and senescent cell antigen like domains 2                                    | 106.2943 | 116.3083 | 143.0713 | 123.7153 | 107.7064 | 106.6611 |
| 17233437 | Lims1        | LIM and senescent cell antigen-like domains 1                                    | 21.69243 | 25.07834 | 24.9921  | 21.62428 | 17.368   | 28.49743 |
| 17255877 | Lasp1        | LIM and SH3 protein 1                                                            | 29.20695 | 28.55636 | 31.8107  | 32.42872 | 33.63334 | 30.63736 |
| 17321645 | Lima1        | LIM domain and actin binding 1                                                   | 87.71429 | 90.99151 | 97.52499 | 84.00481 | 93.45112 | 78.92498 |
| 17365314 | Ldb1         | LIM domain binding 1                                                             | 63.24984 | 80.03838 | 74.12252 | 78.35318 | 82.41471 | 66.23308 |
| 17447884 | Ldb2         | LIM domain binding 2                                                             | 19.60813 | 21.29481 | 19.11496 | 21.29481 | 19.89315 | 21.29481 |
| 17305070 | Ldb3         | LIM domain binding 3                                                             | 4.464504 | 6.041932 | 5.19297  | 4.82497  | 7.477417 | 5.190595 |
| 17270730 | Limd2        | LIM domain containing 2                                                          | 31.02286 | 29.34027 | 31.34732 | 31.29434 | 25.72537 | 23.15802 |
| 17324451 | Lpp          | LIM domain containing preferred translocation partner in lipoma                  | 54.62805 | 66.69885 | 83.31648 | 62.71071 | 74.9294  | 65.40368 |
| 17329445 | Lppos        | LIM domain containing preferred translocation partner in lipoma, opposite strand | 15.1959  | 17.91828 | 20.20317 | 20.7059  | 23.69449 | 21.66133 |

|          |          |                                                        |          |          |          |          |          |          |
|----------|----------|--------------------------------------------------------|----------|----------|----------|----------|----------|----------|
| 17494842 | Lmo1     | LIM domain only 1                                      | 3.998669 | 3.585464 | 3.701936 | 4.04817  | 3.321235 | 3.017513 |
| 17373781 | Lmo2     | LIM domain only 2                                      | 22.76491 | 22.13627 | 26.09732 | 23.99746 | 23.2389  | 26.2834  |
| 17472288 | Lmo3     | LIM domain only 3                                      | 3.884772 | 3.100197 | 3.954568 | 3.726858 | 3.313142 | 4.431208 |
| 17410809 | Lmo4     | LIM domain only 4                                      | 40.12891 | 39.90368 | 40.12891 | 40.48653 | 37.84734 | 37.49666 |
| 17302429 | Lmo7     | LIM domain only 7                                      | 21.15989 | 31.55048 | 40.52415 | 32.08907 | 26.34414 | 30.41224 |
| 17523597 | Limd1    | LIM domains containing 1                               | 51.64834 | 44.60953 | 45.96105 | 46.5949  | 40.55084 | 41.7302  |
| 17254458 | Lhx1os   | LIM homeobox 1, opposite strand                        | 5.380424 | 4.636544 | 4.511259 | 5.559519 | 4.49724  | 4.39941  |
| 17267039 | Lhx1     | LIM homeobox protein 1                                 | 6.508161 | 10.30862 | 11.75221 | 10.04733 | 10.07522 | 9.161349 |
| 17370439 | Lhx2     | LIM homeobox protein 2                                 | 18.94598 | 19.06269 | 20.30327 | 17.06443 | 18.2835  | 20.22153 |
| 17382851 | Lhx3     | LIM homeobox protein 3                                 | 4.991938 | 4.771623 | 4.813813 | 4.813813 | 4.872087 | 5.575186 |
| 17228398 | Lhx4     | LIM homeobox protein 4                                 | 6.992896 | 6.992896 | 6.992896 | 6.992896 | 6.992896 | 6.992896 |
| 17441652 | Lhx5     | LIM homeobox protein 5                                 | 4.82273  | 4.360852 | 4.595176 | 5.856424 | 3.767298 | 4.435141 |
| 17384533 | Lhx6     | LIM homeobox protein 6                                 | 21.34432 | 22.89467 | 25.32359 | 24.2172  | 26.99967 | 19.34247 |
| 17411338 | Lhx8     | LIM homeobox protein 8                                 | 4.374597 | 4.350014 | 4.653932 | 4.161374 | 4.477613 | 4.74879  |
| 17227589 | Lhx9     | LIM homeobox protein 9                                 | 5.851149 | 6.109058 | 6.508567 | 7.419593 | 5.022759 | 5.907305 |
| 17219127 | Lmx1a    | LIM homeobox transcription factor 1 alpha              | 5.137441 | 5.586714 | 4.473798 | 5.008297 | 4.502761 | 4.886969 |
| 17384190 | Lmx1b    | LIM homeobox transcription factor 1 beta               | 29.40175 | 27.65982 | 29.02532 | 35.34098 | 31.452   | 24.50527 |
| 17259763 | Limk2    | LIM motif-containing protein kinase 2                  | 7.671241 | 9.2989   | 8.983079 | 7.724117 | 5.703391 | 10.80907 |
| 17386639 | Lnp      | limb and neural patterns                               | 11.45448 | 9.813107 | 9.215037 | 9.696136 | 9.307605 | 10.15156 |
| 17333686 | Lix1     | limb expression 1 homolog (chicken)                    | 3.462322 | 3.957584 | 4.661163 | 4.553702 | 3.32363  | 3.400177 |
| 17446587 | Lmbr1    | limb region 1                                          | 10.97303 | 15.59963 | 17.20863 | 15.23914 | 13.8301  | 14.12521 |
| 17321440 | Lmbr1l   | limb region 1 like                                     | 14.05849 | 16.49938 | 19.51417 | 15.37623 | 15.27415 | 19.51417 |
| 17339554 | Lbh      | limb-bud and heart                                     | 45.63599 | 45.2972  | 56.8473  | 41.84316 | 45.2972  | 32.68145 |
| 17325671 | Lsamp    | limbic system-associated membrane protein              | 4.804113 | 6.140687 | 5.423898 | 5.20627  | 4.959621 | 6.695074 |
| 17453430 | Limk1    | LIM-domain containing, protein kinase                  | 28.62552 | 27.69685 | 29.64774 | 31.91715 | 18.98516 | 26.10909 |
| 17431166 | Lin28a   | lin-28 homolog A (C. elegans)                          | 10.21898 | 12.16446 | 10.16987 | 9.488237 | 6.644618 | 11.00304 |
| 17240670 | Lin28b   | lin-28 homolog B (C. elegans)                          | 3.725619 | 4.398648 | 4.068875 | 3.515403 | 4.348537 | 4.46005  |
| 17489138 | Lin37    | lin-37 homolog (C. elegans)                            | 35.09005 | 35.90816 | 44.07962 | 37.66232 | 37.14767 | 37.56117 |
| 17277270 | Lin52    | lin-52 homolog (C. elegans)                            | 32.14918 | 35.53429 | 30.5411  | 33.36122 | 32.83244 | 34.37291 |
| 17450098 | Lin54    | lin-54 homolog (C. elegans)                            | 31.06418 | 31.06418 | 28.01874 | 27.47124 | 31.95656 | 31.74814 |
| 17237132 | Lin7a    | lin-7 homolog A (C. elegans)                           | 50.01469 | 41.83011 | 50.19494 | 46.20061 | 49.24618 | 47.91382 |
| 17490785 | Lin7b    | lin-7 homolog B (C. elegans)                           | 6.992896 | 13.61391 | 9.66527  | 9.706627 | 9.706627 | 8.128787 |
| 17374089 | Lin7c    | lin-7 homolog C (C. elegans)                           | 91.2492  | 82.72492 | 73.8282  | 74.57447 | 71.55149 | 81.55888 |
| 17220148 | Lin9     | lin-9 homolog (C. elegans)                             | 11.84799 | 9.464852 | 12.25935 | 12.67664 | 14.41841 | 11.89844 |
| 17415702 | L1td1    | LINE-1 type transposase domain containing 1            | 5.429992 | 7.907929 | 7.902943 | 6.683158 | 7.072057 | 8.175517 |
| 17479012 | Lins1    | lines homolog (Drosophila) 1                           | 11.35307 | 7.901355 | 11.13176 | 10.01604 | 9.312122 | 8.0216   |
| 17496150 | Lat      | linker for activation of T cells                       | 6.149035 | 8.794003 | 9.014203 | 6.369632 | 6.992896 | 7.467214 |
| 17453406 | Lat2     | linker for activation of T cells family, member 2      | 13.45304 | 12.39237 | 14.10886 | 15.521   | 17.56303 | 15.17379 |
| 17334697 | Lmf1     | lipase maturation factor 1                             | 104.1905 | 109.7228 | 111.307  | 102.1801 | 97.7944  | 107.3055 |
| 17320457 | Lmf2     | lipase maturation factor 2                             | 51.70027 | 59.22523 | 71.26294 | 59.0936  | 48.49049 | 51.97983 |
| 17355443 | Lipg     | lipase, endothelial                                    | 25.74928 | 27.58056 | 22.96126 | 23.72457 | 25.67407 | 20.77231 |
| 17358737 | Lipk     | lipase, family member K                                | 3.514867 | 3.780717 | 3.040861 | 3.481478 | 3.000993 | 3.422333 |
| 17358764 | Lipm     | lipase, family member M                                | 3.906563 | 4.416336 | 3.968214 | 4.238313 | 4.742113 | 4.347391 |
| 17358749 | Lipn     | lipase, family member N                                | 2.580964 | 3.361325 | 2.471505 | 2.570912 | 4.141777 | 2.7787   |
| 17358724 | Lipf     | lipase, gastric                                        | 3.588523 | 3.257082 | 3.39175  | 3.139729 | 3.485535 | 3.450009 |
| 17528629 | Lipc     | lipase, hepatic                                        | 211.5522 | 174.1661 | 172.428  | 191.6566 | 154.8567 | 173.1826 |
| 17487927 | Lipe     | lipase, hormone sensitive                              | 18.72015 | 21.87347 | 28.62314 | 20.41914 | 22.24023 | 20.242   |
| 17329243 | Liph     | lipase, member H                                       | 3.711545 | 5.284401 | 3.843685 | 4.254354 | 4.354026 | 4.09465  |
| 17331518 | Lipi     | lipase, member I                                       | 2.705078 | 3.518352 | 3.182322 | 3.287612 | 2.626006 | 2.689727 |
| 17364026 | Lipo1    | lipase, member O1                                      | 9.426943 | 10.23025 | 8.636879 | 8.149096 | 6.70822  | 6.890124 |
| 17273899 | Ldah     | lipid droplet associated hydrolase                     | 164.6296 | 134.9948 | 107.8334 | 116.1463 | 85.35537 | 110.4822 |
| 17280062 | Lpin1    | lipin 1                                                | 109.3182 | 165.1691 | 195.9049 | 210.2191 | 330.0498 | 319.3158 |
| 17339434 | Lpin2    | lipin 2                                                | 296.9076 | 414.558  | 439.1226 | 361.7903 | 406.1334 | 383.1778 |
| 17379077 | Lpin3    | lipin 3                                                | 12.12262 | 11.01212 | 10.86465 | 13.26148 | 10.51575 | 11.0851  |
| 17368154 | Lcn10    | lipocalin 10                                           | 4.120387 | 6.030928 | 4.975357 | 6.343592 | 6.030928 | 5.917632 |
| 17368193 | Lcn11    | lipocalin 11                                           | 6.405095 | 7.113157 | 6.801722 | 6.801722 | 6.377009 | 6.293707 |
| 17382603 | Lcn12    | lipocalin 12                                           | 11.46163 | 10.6016  | 8.84468  | 9.042615 | 9.943061 | 6.77927  |
| 17383892 | Lcn2     | lipocalin 2                                            | 134.9845 | 302.5689 | 484.8888 | 117.7701 | 349.1831 | 290.0685 |
| 17368184 | Lcn3     | lipocalin 3                                            | 3.115341 | 2.931522 | 3.891618 | 3.161677 | 3.84635  | 3.345287 |
| 17383131 | Lcn4     | lipocalin 4                                            | 2.406006 | 2.846166 | 2.545025 | 2.521094 | 4.194416 | 3.050128 |
| 17368130 | Lcn5     | lipocalin 5                                            | 7.103992 | 7.183864 | 7.717855 | 7.747227 | 10.06301 | 9.197935 |
| 17368141 | Lcn6     | lipocalin 6                                            | 8.3399   | 8.499865 | 7.05101  | 5.964908 | 7.455422 | 7.517276 |
| 17368122 | Lcn8     | lipocalin 8                                            | 5.157171 | 5.812424 | 4.937532 | 4.793934 | 6.491897 | 5.853583 |
| 17368204 | Lcn9     | lipocalin 9                                            | 4.025171 | 4.031034 | 4.089686 | 4.189302 | 4.10653  | 4.761975 |
| 17437773 | Lias     | lipoic acid synthetase                                 | 77.20113 | 79.47009 | 73.91576 | 87.02753 | 70.9598  | 79.126   |
| 17489384 | Lsr      | lipolysis stimulated lipoprotein receptor              | 139.674  | 144.0624 | 163.3486 | 136.3263 | 139.3588 | 95.13999 |
| 17397511 | Lhfp     | lipoma HMGIC fusion partner                            | 27.3144  | 26.87606 | 25.43988 | 24.14161 | 18.69344 | 19.31273 |
| 17545150 | Lhfp1    | lipoma HMGIC fusion partner-like 1                     | 5.040476 | 4.955223 | 4.062929 | 4.631887 | 4.063407 | 4.714027 |
| 17289196 | Lhfp2    | lipoma HMGIC fusion partner-like 2                     | 11.88566 | 9.504298 | 8.854679 | 8.949208 | 6.266196 | 9.404557 |
| 17435180 | Lhfp3    | lipoma HMGIC fusion partner-like 3                     | 2.865725 | 3.470179 | 2.973867 | 3.051186 | 2.757193 | 3.008616 |
| 17353557 | Lhfp5    | lipoma HMGIC fusion partner-like 5                     | 5.717522 | 4.932811 | 5.476067 | 5.053805 | 6.973534 | 4.787326 |
| 17469691 | Lhfp4    | lipoma HMGIC fusion partner-like protein 4             | 5.671656 | 6.992896 | 6.649657 | 5.75757  | 6.599972 | 5.907141 |
| 17378827 | Lbp      | lipopolysaccharide binding protein                     | 241.614  | 296.5188 | 302.397  | 237.9097 | 259.056  | 146.1707 |
| 17501633 | Lpl      | lipoprotein lipase                                     | 105.0943 | 134.7807 | 143.4585 | 93.22791 | 137.5975 | 114.719  |
| 17351963 | Loxhd1   | lipoxigenase homology domains 1                        | 5.829613 | 6.173463 | 4.465371 | 5.829613 | 5.829613 | 6.211579 |
| 17480636 | Lipt2    | lipoyl(octanoyl) transferase 2 (putative)              | 12.99919 | 17.69684 | 17.67416 | 11.23003 | 13.44008 | 12.75526 |
| 17211987 | Lipt1    | lipoyltransferase 1                                    | 7.865781 | 11.46123 | 10.66876 | 7.776818 | 10.17848 | 9.863502 |
| 17211990 | Lipt1    | lipoyltransferase 1                                    | 11.04912 | 8.177841 | 10.13771 | 7.698994 | 6.965756 | 10.9431  |
| 17331731 | Ltn1     | listerin E3 ubiquitin protein ligase 1                 | 55.07975 | 40.6592  | 38.81117 | 52.4947  | 49.33501 | 48.52412 |
| 17281721 | Pygl     | liver glycogen phosphorylase                           | 243.5763 | 207.6414 | 208.8741 | 265.983  | 273.5555 | 286.9946 |
| 17262644 | Leap2    | liver-expressed antimicrobial peptide 2                | 18.01691 | 14.29194 | 11.15292 | 18.04879 | 19.01466 | 17.4155  |
| 17400622 | Lix1l    | Lix1-like                                              | 17.69684 | 18.05404 | 19.32491 | 17.69684 | 14.48824 | 17.69684 |
| 17395948 | Lkaaear1 | LKAAEAR motif containing 1 (IKAAEAR murine motif)      | 3.787485 | 3.421953 | 3.787485 | 4.297447 | 3.787485 | 3.692429 |
| 17237665 | Llph     | LLP homolog, long-term synaptic facilitation (Aplysia) | 14.92811 | 16.42703 | 13.2983  | 14.621   | 12.80522 | 17.91045 |

|          |               |                                                                                    |          |          |          |          |          |          |
|----------|---------------|------------------------------------------------------------------------------------|----------|----------|----------|----------|----------|----------|
| 17548354 | Llph-ps1      | LLP homolog, pseudogene 1                                                          | 79.51913 | 95.46632 | 89.16403 | 87.78971 | 103.549  | 106.2994 |
| 17540325 | Llph-ps2      | LLP homolog, pseudogene 2                                                          | 12.94022 | 8.248375 | 11.07228 | 15.37101 | 16.21559 | 11.86903 |
| 17211498 | Lmbrd1        | LMBR1 domain containing 1                                                          | 176.2281 | 167.0632 | 168.21   | 146.7656 | 159.0923 | 171.104  |
| 17310201 | Lmbrd2        | LMBR1 domain containing 2                                                          | 213.6684 | 172.428  | 149.3434 | 160.9267 | 161.8586 | 174.1166 |
| 17346317 | Lonp1         | lon peptidase 1, mitochondrial                                                     | 135.1455 | 123.7796 | 125.612  | 126.118  | 116.2591 | 114.4402 |
| 17503507 | Lonp2         | lon peptidase 2, peroxisomal                                                       | 560.7524 | 587.5672 | 493.0636 | 566.4795 | 462.7342 | 464.0576 |
| 17508787 | Lonrf1        | LON peptidase N-terminal domain and ring finger 1                                  | 13.76087 | 10.96147 | 14.41701 | 11.48971 | 10.90328 | 12.91289 |
| 17222495 | Lonrf2        | LON peptidase N-terminal domain and ring finger 2                                  | 3.478511 | 3.869105 | 4.245869 | 4.299712 | 4.185645 | 4.735117 |
| 17534074 | Lonrf3        | LON peptidase N-terminal domain and ring finger 3                                  | 11.40647 | 7.550384 | 8.640591 | 8.307878 | 8.11595  | 9.405991 |
| 17373778 | Lincrd1       | long intergenic non-protein coding RNA of erythroid differentiation 1              | 4.123816 | 7.82326  | 5.986322 | 5.708177 | 5.283815 | 6.966625 |
| 17289382 | Lncenc1       | long non-coding RNA, embryonic stem cells expressed 1                              | 4.228629 | 4.228629 | 4.604294 | 3.933463 | 5.188941 | 5.852812 |
| 17465608 | Lncpint       | long non-protein coding RNA, Trp53 induced transcript                              | 69.75477 | 84.27075 | 83.61733 | 52.57154 | 47.66406 | 66.16608 |
| 17407378 | Lor           | loricrin                                                                           | 3.954321 | 4.801649 | 4.835215 | 4.627907 | 5.031854 | 5.331642 |
| 17515315 | Ldlr          | low density lipoprotein receptor                                                   | 107.3442 | 70.22778 | 123.9737 | 67.97065 | 103.2115 | 75.69783 |
| 17431708 | Ldlrad2       | low density lipoprotein receptor A domain containing 2                             | 9.402602 | 6.777109 | 8.48315  | 9.540865 | 6.398173 | 10.0962  |
| 17431350 | Ldlrap1       | low density lipoprotein receptor adaptor protein 1                                 | 52.3853  | 62.37604 | 62.05863 | 68.27095 | 61.81864 | 59.16943 |
| 17416440 | Ldlrad1       | low density lipoprotein receptor class A domain containing 1                       | 15.35589 | 12.24516 | 12.75349 | 10.66824 | 13.32266 | 14.13314 |
| 17388705 | Ldlrad3       | low density lipoprotein receptor class A domain containing 3                       | 13.80233 | 12.44177 | 16.77592 | 14.52111 | 17.06786 | 21.58414 |
| 17351559 | Ldlrad4       | low density lipoprotein receptor class A domain containing 4                       | 20.79392 | 26.87327 | 21.86361 | 18.34506 | 19.79632 | 23.41303 |
| 17245923 | Lrp1          | low density lipoprotein receptor-related protein 1                                 | 494.0078 | 523.3165 | 508.2555 | 473.9858 | 521.3144 | 438.3988 |
| 17231522 | Lrp11         | low density lipoprotein receptor-related protein 11                                | 18.41884 | 17.46349 | 13.575   | 18.07671 | 18.88947 | 14.40203 |
| 17386210 | Lrp2          | low density lipoprotein receptor-related protein 2                                 | 4.20927  | 3.834796 | 4.20927  | 4.11408  | 4.485752 | 4.20927  |
| 17489713 | Lrp3          | low density lipoprotein receptor-related protein 3                                 | 17.90611 | 14.97548 | 16.83393 | 17.64992 | 14.91332 | 18.44746 |
| 17373283 | Lrp4          | low density lipoprotein receptor-related protein 4                                 | 36.70844 | 46.4427  | 47.26204 | 35.5974  | 34.1466  | 42.48142 |
| 17360977 | Lrp5          | low density lipoprotein receptor-related protein 5                                 | 109.3758 | 101.8082 | 102.8844 | 111.4768 | 112.9061 | 91.43281 |
| 17471995 | Lrp6          | low density lipoprotein receptor-related protein 6                                 | 154.9974 | 196.9056 | 224.4748 | 194.5288 | 168.385  | 180.4281 |
| 17416540 | Lrp8          | low density lipoprotein receptor-related protein 8, apolipoprotein e receptor      | 5.849649 | 8.032394 | 7.448449 | 8.032394 | 9.52527  | 9.119913 |
| 17427958 | Lrp8os1       | low density lipoprotein receptor-related protein 8, apolipoprotein e receptor, opp | 3.481985 | 3.445635 | 2.787516 | 3.521719 | 3.505232 | 4.440124 |
| 17427951 | Lrp8os2       | low density lipoprotein receptor-related protein 8, apolipoprotein e receptor, opp | 8.843577 | 9.443424 | 8.561657 | 9.259344 | 10.30741 | 10.51422 |
| 17427948 | Lrp8os3       | low density lipoprotein receptor-related protein 8, apolipoprotein e receptor, opp | 5.144426 | 6.070982 | 6.184342 | 4.577691 | 6.030928 | 6.42506  |
| 17447310 | Lrpap1        | low density lipoprotein receptor-related protein associated protein 1              | 40.03722 | 43.14406 | 31.97539 | 37.22784 | 30.29736 | 32.50185 |
| 17316754 | Lrp12         | low density lipoprotein-related protein 12                                         | 11.21292 | 11.05134 | 10.11848 | 12.20111 | 11.50086 | 8.420524 |
| 17384826 | Lrp1b         | low density lipoprotein-related protein 1B (deleted in tumors)                     | 3.674251 | 3.674251 | 3.674251 | 3.684171 | 4.332711 | 3.674251 |
| 17300292 | Lrp10         | low-density lipoprotein receptor-related protein 10                                | 85.55736 | 79.16111 | 76.20427 | 76.87007 | 73.5116  | 69.1741  |
| 17328124 | Litaf         | LPS-induced TN factor                                                              | 33.9646  | 37.82767 | 41.37823 | 33.25064 | 35.69623 | 30.25601 |
| 17398655 | Lrba          | LPS-responsive beige-like anchor                                                   | 63.00612 | 60.21162 | 61.71845 | 54.76415 | 56.58626 | 64.62946 |
| 17500957 | Lrp2bp        | Lrp2 binding protein                                                               | 6.981563 | 7.097053 | 8.499865 | 8.316405 | 7.981445 | 8.822271 |
| 17357255 | Lrrn4cl       | LRRN4 C-terminal like                                                              | 12.49665 | 11.41311 | 11.46433 | 10.6655  | 11.96311 | 13.35307 |
| 17500188 | Lsm1          | LSM1 homolog, U6 small nuclear RNA associated (S. cerevisiae)                      | 23.68317 | 23.92555 | 22.34515 | 25.55954 | 22.62757 | 26.07093 |
| 17270071 | Lsm12         | LSM12 homolog (S. cerevisiae)                                                      | 210.5881 | 207.6802 | 209.3249 | 186.3421 | 179.6344 | 179.1929 |
| 17489668 | Lsm14a        | LSM14 homolog A (SCD6, S. cerevisiae)                                              | 55.38487 | 63.00481 | 58.22795 | 57.56181 | 56.0033  | 55.77551 |
| 17380666 | Lsm14b        | LSM14 homolog B (SCD6, S. cerevisiae)                                              | 22.44201 | 25.36118 | 25.36118 | 26.30108 | 23.80017 | 27.50134 |
| 17336829 | Lsm2          | LSM2 homolog, U6 small nuclear RNA associated (S. cerevisiae)                      | 15.33004 | 15.77152 | 21.31105 | 18.37331 | 22.3653  | 17.72373 |
| 17460933 | Lsm3          | LSM3 homolog, U6 small nuclear RNA associated (S. cerevisiae)                      | 18.16312 | 21.20217 | 18.56972 | 21.82954 | 22.90054 | 21.80913 |
| 17501994 | Lsm4          | LSM4 homolog, U6 small nuclear RNA associated (S. cerevisiae)                      | 55.37143 | 57.71762 | 59.58924 | 51.19    | 65.01993 | 60.89028 |
| 17467108 | Lsm5          | LSM5 homolog, U6 small nuclear RNA associated (S. cerevisiae)                      | 6.662991 | 4.747638 | 6.837552 | 6.274715 | 12.8585  | 10.36638 |
| 17510707 | Lsm6          | LSM6 homolog, U6 small nuclear RNA associated (S. cerevisiae)                      | 47.13543 | 49.01291 | 54.10012 | 60.22581 | 61.79679 | 58.01001 |
| 17234800 | Lsm7          | LSM7 homolog, U6 small nuclear RNA associated (S. cerevisiae)                      | 37.8358  | 35.36107 | 44.0445  | 38.49769 | 40.66315 | 46.88193 |
| 17243117 | Lsm7          | LSM7 homolog, U6 small nuclear RNA associated (S. cerevisiae)                      | 24.35625 | 22.75829 | 27.59414 | 29.53451 | 26.33884 | 31.91472 |
| 17456285 | Lsm8          | LSM8 homolog, U6 small nuclear RNA associated (S. cerevisiae)                      | 11.58238 | 18.01042 | 16.18685 | 16.47824 | 18.37446 | 9.775361 |
| 17307638 | Ltdh          | L-threonine dehydrogenase                                                          | 9.907767 | 9.276175 | 8.054751 | 9.533923 | 9.05541  | 10.97501 |
| 17239371 | Ltv1          | LTV1 homolog (S. cerevisiae)                                                       | 30.65308 | 29.01908 | 26.67192 | 30.70709 | 28.27412 | 25.673   |
| 17334904 | Luc7l         | Luc7 homolog (S. cerevisiae)-like                                                  | 36.88213 | 28.62016 | 32.48113 | 31.82768 | 29.77707 | 30.36758 |
| 17457436 | Luc7l2        | LUC7-like 2 (S. cerevisiae)                                                        | 109.0012 | 131.553  | 133.1289 | 126.8729 | 138.494  | 146.3116 |
| 17267822 | Luc7l3        | LUC7-like 3 (S. cerevisiae)                                                        | 60.4437  | 90.95304 | 83.2224  | 81.26544 | 86.33418 | 95.49412 |
| 17236811 | Lum           | lumican                                                                            | 15.3854  | 25.30517 | 26.81745 | 18.00356 | 14.76869 | 12.75305 |
| 17477800 | Lhb           | luteinizing hormone beta                                                           | 6.171709 | 5.310729 | 5.412293 | 6.066734 | 6.285162 | 5.998742 |
| 17347990 | Lhcgr         | luteinizing hormone/choriogonadotropin receptor                                    | 3.832989 | 4.25996  | 4.231121 | 3.634911 | 3.994736 | 4.105961 |
| 17437072 | Lyar          | Ly1 antibody reactive clone                                                        | 19.24751 | 23.25743 | 20.92825 | 18.49649 | 21.82848 | 18.19323 |
| 17318013 | Lynx1         | Ly6/neurotoxin 1                                                                   | 9.731215 | 10.12058 | 8.915032 | 8.51685  | 5.991719 | 8.467875 |
| 17226435 | Lypd1         | Ly6/Plaur domain containing 1                                                      | 8.440333 | 8.363113 | 7.190739 | 8.56991  | 7.129347 | 7.482083 |
| 17317994 | Lypd2         | Ly6/Plaur domain containing 2                                                      | 5.246481 | 5.161463 | 5.004688 | 5.338965 | 6.230898 | 5.338965 |
| 17475054 | Lypd3         | Ly6/Plaur domain containing 3                                                      | 7.916101 | 8.393951 | 9.095544 | 8.299992 | 9.765067 | 10.0651  |
| 17487779 | Lypd4         | Ly6/Plaur domain containing 4                                                      | 6.808184 | 8.63628  | 7.820712 | 6.344076 | 7.39341  | 7.089825 |
| 17474934 | Lypd5         | Ly6/Plaur domain containing 5                                                      | 4.87675  | 6.769034 | 5.803286 | 6.210373 | 6.262506 | 6.1429   |
| 17370705 | Lypd6         | LY6/PLAUR domain containing 6                                                      | 5.290338 | 6.982337 | 4.20927  | 5.174968 | 5.271049 | 5.465563 |
| 17370691 | Lypd6b        | LY6/PLAUR domain containing 6B                                                     | 3.874607 | 5.145888 | 3.898448 | 4.39496  | 3.984504 | 4.212393 |
| 17250044 | Lypd8         | LY6/PLAUR domain containing 8                                                      | 3.541376 | 5.025626 | 3.911386 | 4.322542 | 2.897322 | 3.754654 |
| 17495097 | Lyve1         | lymphatic vessel endothelial hyaluronan receptor 1                                 | 104.2115 | 135.2861 | 145.8711 | 97.7822  | 73.65798 | 81.57358 |
| 17503208 | Ly1l          | lymphoblastic leukemia 1                                                           | 7.673741 | 9.117574 | 9.231595 | 10.56778 | 7.426127 | 10.5798  |
| 17318118 | 9030619P08Rik | lymphocyte antigen 6 complex pseudogene                                            | 18.61934 | 20.29384 | 32.82516 | 30.57287 | 50.90445 | 35.10221 |
| 17318083 | Ly6a          | lymphocyte antigen 6 complex, locus A                                              | 118.0857 | 199.3625 | 339.6229 | 206.1442 | 103.8408 | 158.4946 |
| 17318089 | Ly6c1         | lymphocyte antigen 6 complex, locus C1                                             | 3.436977 | 2.228712 | 2.792021 | 3.253494 | 5.768835 | 2.82353  |
| 17318100 | Ly6c2         | lymphocyte antigen 6 complex, locus C2                                             | 5.423409 | 6.287864 | 11.29021 | 5.423409 | 4.499485 | 5.69857  |
| 17318020 | Ly6d          | lymphocyte antigen 6 complex, locus D                                              | 44.37545 | 128.1562 | 166.3629 | 119.0943 | 54.53498 | 44.72315 |
| 17312209 | Ly6e          | lymphocyte antigen 6 complex, locus E                                              | 715.7143 | 662.0104 | 808.4698 | 693.0665 | 801.6618 | 640.4801 |
| 17312229 | Ly6f          | lymphocyte antigen 6 complex, locus F                                              | 2.823667 | 2.77664  | 2.713923 | 2.217478 | 2.688069 | 3.014398 |
| 17312219 | Ly6g          | lymphocyte antigen 6 complex, locus G                                              | 3.476824 | 2.591289 | 2.788308 | 3.062522 | 2.720968 | 2.843623 |
| 17344216 | Ly6g5b        | lymphocyte antigen 6 complex, locus G5B                                            | 3.570386 | 6.119526 | 5.653287 | 5.151277 | 4.628709 | 7.13805  |
| 17336965 | Ly6g5c        | lymphocyte antigen 6 complex, locus G5C                                            | 5.463479 | 6.380281 | 6.528583 | 7.125889 | 7.362063 | 5.680154 |
| 17336921 | Ly6g6c        | lymphocyte antigen 6 complex, locus G6C                                            | 9.123011 | 9.123011 | 6.435445 | 8.282349 | 8.537833 | 9.904266 |
| 17344200 | Ly6g6d        | lymphocyte antigen 6 complex, locus G6D                                            | 4.712851 | 5.386656 | 5.537482 | 6.132732 | 5.651642 | 5.320383 |
| 17336929 | Ly6g6e        | lymphocyte antigen 6 complex, locus G6E                                            | 18.03928 | 18.81329 | 17.7096  | 19.47026 | 12.93027 | 14.92408 |
| 17344208 | Ly6g6f        | lymphocyte antigen 6 complex, locus G6F                                            | 7.169189 | 7.441946 | 6.241315 | 8.758963 | 10.06671 | 7.169189 |

|          |         |                                                           |          |          |          |          |          |          |
|----------|---------|-----------------------------------------------------------|----------|----------|----------|----------|----------|----------|
| 17318123 | Ly6h    | lymphocyte antigen 6 complex, locus H                     | 5.177946 | 4.681043 | 4.760457 | 4.705767 | 4.365812 | 5.610036 |
| 17318076 | Ly6i    | lymphocyte antigen 6 complex, locus I                     | 2.982061 | 2.683638 | 3.299643 | 3.137271 | 3.68144  | 3.643008 |
| 17318029 | Ly6k    | lymphocyte antigen 6 complex, locus K                     | 13.01984 | 13.17079 | 13.91192 | 13.91192 | 14.49848 | 14.96386 |
| 17385574 | Ly75    | lymphocyte antigen 75                                     | 6.992896 | 7.042072 | 5.960651 | 6.171709 | 7.682895 | 5.212011 |
| 17286587 | Ly86    | lymphocyte antigen 86                                     | 49.58837 | 49.66818 | 57.77086 | 42.89864 | 45.80204 | 42.06767 |
| 17229767 | Ly9     | lymphocyte antigen 9                                      | 10.8706  | 10.76958 | 18.00044 | 11.89126 | 12.87651 | 12.21041 |
| 17211286 | Ly96    | lymphocyte antigen 96                                     | 57.74083 | 75.52959 | 100.9411 | 63.40479 | 55.42443 | 51.78133 |
| 17301968 | Lcp1    | lymphocyte cytosolic protein 1                            | 158.7563 | 141.5551 | 144.1873 | 123.0849 | 127.6261 | 121.8498 |
| 17248380 | Lcp2    | lymphocyte cytosolic protein 2                            | 64.82148 | 70.30961 | 84.77459 | 55.40292 | 41.64525 | 55.11259 |
| 17427799 | Lexm    | lymphocyte expansion molecule                             | 39.88211 | 43.21949 | 43.46674 | 39.61514 | 37.22552 | 31.23908 |
| 17427802 | Lexm    | lymphocyte expansion molecule                             | 5.098914 | 5.120306 | 5.120306 | 5.120306 | 4.512697 | 4.480718 |
| 17430413 | Lck     | lymphocyte protein tyrosine kinase                        | 5.765117 | 5.332973 | 5.332973 | 5.913614 | 5.416196 | 5.703035 |
| 17485226 | Lsp1    | lymphocyte specific 1                                     | 16.0462  | 15.11459 | 18.4173  | 17.88552 | 12.79404 | 16.62428 |
| 17227025 | Lax1    | lymphocyte transmembrane adaptor 1                        | 4.975288 | 4.61471  | 4.149622 | 4.61471  | 5.423108 | 4.046627 |
| 17470976 | Lag3    | lymphocyte-activation gene 3                              | 5.974674 | 5.848757 | 6.820323 | 7.324702 | 4.525979 | 6.260032 |
| 17402662 | Lef1    | lymphoid enhancer binding factor 1                        | 5.976124 | 6.754037 | 6.318184 | 5.976124 | 6.135964 | 5.617312 |
| 17464210 | Lrmp    | lymphoid-restricted membrane protein                      | 7.85984  | 9.208014 | 8.997287 | 8.298324 | 9.187676 | 9.534386 |
| 17344316 | Lta     | lymphotoxin A                                             | 5.650819 | 6.417271 | 5.733078 | 5.386134 | 6.44978  | 5.386134 |
| 17337024 | Ltb     | lymphotoxin B                                             | 9.885816 | 10.5291  | 11.33309 | 10.49543 | 9.217401 | 10.29855 |
| 17471094 | Ltbr    | lymphotoxin B receptor                                    | 70.09453 | 67.8652  | 73.30451 | 61.50407 | 68.77441 | 69.60842 |
| 17482355 | Lym1    | LYR motif containing 1                                    | 9.003775 | 9.182646 | 7.62327  | 9.003775 | 10.48228 | 9.003775 |
| 17412534 | Lym2    | LYR motif containing 2                                    | 17.6273  | 14.88616 | 15.14122 | 19.42873 | 23.49464 | 25.20521 |
| 17291866 | Lym4    | LYR motif containing 4                                    | 31.96697 | 36.96121 | 31.47228 | 33.87174 | 34.32315 | 36.22767 |
| 17464238 | Lym5    | LYR motif containing 5                                    | 86.45096 | 101.7892 | 91.35299 | 112.0944 | 92.09239 | 120.4491 |
| 17262848 | Lym7    | LYR motif containing 7                                    | 5.163717 | 4.271136 | 6.075446 | 7.999168 | 4.482365 | 7.786095 |
| 17249774 | Lym7os  | LYR motif containing 7, opposite strand                   | 2.98233  | 3.078527 | 2.704028 | 2.837971 | 2.537609 | 2.849344 |
| 17253700 | Lym9    | LYR motif containing 9                                    | 10.3745  | 11.99491 | 11.9052  | 10.58185 | 7.919833 | 8.704853 |
| 17431562 | Kdm1a   | lysine (K)-specific demethylase 1A                        | 35.07862 | 30.86308 | 29.42499 | 33.80583 | 30.56122 | 31.37123 |
| 17287041 | Kdm1b   | lysine (K)-specific demethylase 1B                        | 51.01431 | 45.58477 | 50.81421 | 51.39728 | 56.30261 | 57.0676  |
| 17361250 | Kdm2a   | lysine (K)-specific demethylase 2A                        | 93.11812 | 98.67618 | 86.67236 | 90.1909  | 97.15592 | 91.1727  |
| 17452498 | Kdm2b   | lysine (K)-specific demethylase 2B                        | 12.35189 | 12.25128 | 11.82272 | 11.06131 | 10.46667 | 12.58925 |
| 17467624 | Kdm3a   | lysine (K)-specific demethylase 3A                        | 46.21855 | 57.77086 | 54.23003 | 42.9936  | 59.11408 | 47.01796 |
| 17429026 | Kdm4a   | lysine (K)-specific demethylase 4A                        | 65.65213 | 62.84125 | 63.43249 | 74.85569 | 72.16113 | 67.36092 |
| 17338767 | Kdm4b   | lysine (K)-specific demethylase 4B                        | 20.89941 | 16.46785 | 20.37616 | 20.29525 | 21.63987 | 17.30947 |
| 17414935 | Kdm4c   | lysine (K)-specific demethylase 4C                        | 27.77664 | 28.30608 | 27.38151 | 30.21138 | 31.14201 | 28.86721 |
| 17524022 | Kdm4d   | lysine (K)-specific demethylase 4D                        | 4.754389 | 3.883991 | 3.892697 | 3.547198 | 3.305847 | 3.363516 |
| 17462318 | Kdm5a   | lysine (K)-specific demethylase 5A                        | 34.61631 | 38.65599 | 37.20101 | 51.11058 | 44.36684 | 38.86528 |
| 17217500 | Kdm5b   | lysine (K)-specific demethylase 5B                        | 41.26881 | 48.53185 | 49.73226 | 52.62075 | 37.15179 | 48.52681 |
| 17538912 | Kdm5c   | lysine (K)-specific demethylase 5C                        | 76.69869 | 72.16413 | 71.34399 | 65.14443 | 71.42761 | 66.96986 |
| 17546287 | Kdm5d   | lysine (K)-specific demethylase 5D                        | 15.21276 | 12.8077  | 15.28326 | 14.58496 | 17.94313 | 19.94368 |
| 17533498 | Kdm6a   | lysine (K)-specific demethylase 6A                        | 57.16103 | 51.67663 | 39.87907 | 49.88002 | 38.36104 | 40.17483 |
| 17466075 | Kdm7a   | lysine (K)-specific demethylase 7A                        | 33.84967 | 39.28046 | 40.2473  | 31.29434 | 34.90109 | 37.99322 |
| 17482932 | Kdm8    | lysine (K)-specific demethylase 8                         | 10.18829 | 9.053339 | 7.672145 | 9.361307 | 9.788718 | 9.361307 |
| 17526382 | Kmt2a   | lysine (K)-specific methyltransferase 2A                  | 34.3329  | 40.87991 | 42.42198 | 33.79458 | 32.12379 | 33.9858  |
| 17489161 | Kmt2b   | lysine (K)-specific methyltransferase 2B                  | 33.63823 | 30.27028 | 27.89897 | 29.22781 | 32.1445  | 30.15886 |
| 17446354 | Kmt2c   | lysine (K)-specific methyltransferase 2C                  | 41.70302 | 48.16122 | 49.09384 | 48.0775  | 49.09384 | 53.60033 |
| 17321365 | Kmt2d   | lysine (K)-specific methyltransferase 2D                  | 41.70244 | 52.148   | 56.11054 | 45.37859 | 47.68521 | 53.57582 |
| 17435189 | Kmt2e   | lysine (K)-specific methyltransferase 2E                  | 89.11213 | 144.9941 | 137.8609 | 108.3428 | 126.9072 | 123.3309 |
| 17495598 | Knop1   | lysine rich nucleolar protein 1                           | 15.4627  | 17.9821  | 14.00218 | 14.58365 | 14.79554 | 16.10604 |
| 17459463 | Krcc1   | lysine-rich coiled-coil 1                                 | 54.91011 | 48.06018 | 50.69249 | 58.48643 | 38.72759 | 49.84511 |
| 17283082 | Lysmd1  | LysM, putative peptidoglycan-binding, domain containing 1 | 25.63441 | 22.66666 | 29.50444 | 29.7845  | 29.64301 | 29.64301 |
| 17400244 | Lysmd1  | LysM, putative peptidoglycan-binding, domain containing 1 | 19.48673 | 21.24189 | 19.64214 | 23.88777 | 22.22159 | 17.43313 |
| 17519533 | Lysmd2  | LysM, putative peptidoglycan-binding, domain containing 2 | 12.59291 | 9.999112 | 14.1028  | 9.891025 | 8.732835 | 14.41111 |
| 17288898 | Lysmd3  | LysM, putative peptidoglycan-binding, domain containing 3 | 104.8621 | 62.19902 | 65.71314 | 63.4426  | 69.29455 | 60.99208 |
| 17479069 | Lysmd4  | LysM, putative peptidoglycan-binding, domain containing 4 | 16.7122  | 16.32646 | 15.50455 | 18.27108 | 18.9749  | 21.19879 |
| 17339561 | Lclat1  | lysocardiolipin acyltransferase 1                         | 120.3123 | 115.9332 | 119.8611 | 98.60644 | 84.02344 | 98.18019 |
| 17425686 | Lpar1   | lysophosphatidic acid receptor 1                          | 7.495424 | 7.830802 | 8.187596 | 9.448924 | 6.688997 | 9.310251 |
| 17501748 | Lpar2   | lysophosphatidic acid receptor 2                          | 6.295845 | 6.762328 | 4.874519 | 7.619995 | 5.431309 | 5.847338 |
| 17403509 | Lpar3   | lysophosphatidic acid receptor 3                          | 3.638415 | 4.361154 | 3.2246   | 4.09411  | 4.782318 | 3.6769   |
| 17537112 | Lpar4   | lysophosphatidic acid receptor 4                          | 7.076078 | 7.019557 | 5.638143 | 6.106814 | 4.703419 | 6.84144  |
| 17463051 | Lpar5   | lysophosphatidic acid receptor 5                          | 17.42854 | 11.72869 | 16.83206 | 13.86033 | 12.37091 | 10.09809 |
| 17301886 | Lpar6   | lysophosphatidic acid receptor 6                          | 71.51629 | 37.03147 | 65.57618 | 61.0276  | 51.79963 | 55.90634 |
| 17288467 | Lpcat1  | lysophosphatidylcholine acyltransferase 1                 | 11.2641  | 9.909759 | 10.01701 | 10.21141 | 7.352883 | 7.991188 |
| 17503841 | Lpcat2  | lysophosphatidylcholine acyltransferase 2                 | 7.612393 | 9.426224 | 12.68033 | 6.807287 | 8.933652 | 7.077305 |
| 17440037 | Lpcat2b | lysophosphatidylcholine acyltransferase 2B                | 4.759533 | 4.902134 | 4.353422 | 3.867791 | 4.519302 | 6.243002 |
| 17462905 | Lpcat3  | lysophosphatidylcholine acyltransferase 3                 | 255.1108 | 315.7634 | 308.8473 | 250.544  | 292.6596 | 277.8341 |
| 17374218 | Lpcat4  | lysophosphatidylcholine acyltransferase 4                 | 6.054257 | 7.79868  | 7.65329  | 5.844299 | 6.347815 | 6.347815 |
| 17220833 | Lpgat1  | lysophosphatidylglycerol acyltransferase 1                | 172.9834 | 182.8251 | 190.1257 | 181.3056 | 197.2512 | 147.7117 |
| 17210855 | Lypla1  | lysophospholipase 1                                       | 301.286  | 287.6678 | 281.82   | 279.8733 | 257.3557 | 288.8407 |
| 17431502 | Lypla2  | lysophospholipase 2                                       | 73.58552 | 84.09453 | 88.70171 | 84.15925 | 84.09453 | 84.09453 |
| 17230823 | Lypla1l | lysophospholipase-like 1                                  | 73.07875 | 69.52115 | 73.46677 | 82.39643 | 70.16939 | 70.78099 |
| 17364114 | Lipa    | lysosomal acid lipase A                                   | 770.0402 | 742.5683 | 689.6928 | 670.4379 | 611.4709 | 641.1997 |
| 17285267 | Lyst    | lysosomal trafficking regulator                           | 53.89427 | 50.23009 | 50.12749 | 44.25627 | 41.92474 | 48.20297 |
| 17499279 | Lamp1   | lysosomal-associated membrane protein 1                   | 865.83   | 894.5945 | 866.5024 | 818.7675 | 851.2741 | 803.6592 |
| 17541173 | Lamp2   | lysosomal-associated membrane protein 2                   | 755.9201 | 780.5731 | 717.403  | 709.2891 | 678.4835 | 704.0285 |
| 17329046 | Lamp3   | lysosomal-associated membrane protein 3                   | 4.11916  | 4.985022 | 3.12003  | 3.269795 | 5.130004 | 2.54792  |
| 17376783 | Lamp5   | lysosomal-associated membrane protein family, member 5    | 4.268917 | 4.681043 | 4.681043 | 4.563561 | 4.753269 | 4.617654 |
| 17273961 | Laptm4a | lysosomal-associated protein transmembrane 4A             | 223.1732 | 253.4048 | 248.3636 | 207.3623 | 216.2026 | 216.495  |
| 17310912 | Laptm4b | lysosomal-associated protein transmembrane 4B             | 46.81276 | 59.74226 | 62.00918 | 55.73455 | 43.46493 | 58.79331 |
| 17419287 | Laptm5  | lysosomal-associated protein transmembrane 5              | 11.20476 | 10.72734 | 16.9576  | 10.28557 | 9.813855 | 8.684483 |
| 17245231 | Lyzi1   | lysozyme 1                                                | 4.400386 | 4.708084 | 4.269183 | 6.753803 | 7.936924 | 3.892454 |
| 17245223 | Lyzi2   | lysozyme 2                                                | 86.74989 | 112.0105 | 121.1987 | 133.7338 | 127.4617 | 128.0302 |
| 17222420 | Lyg1    | lysozyme G-like 1                                         | 2.734866 | 2.693608 | 2.471745 | 2.602648 | 2.769566 | 2.172988 |
| 17222411 | Lyg2    | lysozyme G-like 2                                         | 5.044391 | 4.032767 | 4.214642 | 4.565333 | 4.079126 | 4.460885 |

|          |              |                                                                             |          |          |          |          |          |          |
|----------|--------------|-----------------------------------------------------------------------------|----------|----------|----------|----------|----------|----------|
| 17348113 | Lyzl1        | lysozyme-like 1                                                             | 3.506496 | 3.110249 | 3.779355 | 3.405815 | 3.839664 | 4.238812 |
| 17532341 | Lyzl4        | lysozyme-like 4                                                             | 3.946654 | 3.883991 | 5.033668 | 3.44812  | 3.733322 | 5.177839 |
| 17523303 | Lyzl4os      | lysozyme-like 4, opposite strand                                            | 9.18061  | 6.541675 | 6.287864 | 5.225684 | 6.135283 | 5.807914 |
| 17270558 | Lyzl6        | lysozyme-like 6                                                             | 6.035361 | 5.908738 | 4.952304 | 5.142821 | 4.894122 | 4.557871 |
| 17354367 | Lox          | lysyl oxidase                                                               | 4.388293 | 3.488991 | 3.703322 | 3.703322 | 3.828953 | 4.214145 |
| 17527694 | Loxl1        | lysyl oxidase-like 1                                                        | 8.15226  | 8.5463   | 11.34984 | 11.9175  | 9.77936  | 9.539608 |
| 17301670 | Loxl2        | lysyl oxidase-like 2                                                        | 17.43422 | 15.1999  | 15.63178 | 17.7445  | 12.70478 | 14.82561 |
| 17459870 | Loxl3        | lysyl oxidase-like 3                                                        | 10.50031 | 11.10194 | 12.7656  | 12.7687  | 8.723155 | 11.85817 |
| 17364851 | Loxl4        | lysyl oxidase-like 4                                                        | 11.71277 | 12.31479 | 13.4774  | 15.38476 | 10.53947 | 11.31222 |
| 17513209 | Kars         | lysyl-tRNA synthetase                                                       | 83.82392 | 80.55488 | 81       | 70.84431 | 74.64222 | 71.2101  |
| 17513389 | Mphosph6     | M phase phosphoprotein 6                                                    | 16.42407 | 12.51711 | 15.68681 | 16.83685 | 17.29496 | 18.76991 |
| 17529046 | Mb21d1       | Mab-21 domain containing 1                                                  | 3.058533 | 3.661615 | 3.577793 | 4.076356 | 3.853742 | 3.339703 |
| 17329527 | Mb21d2       | Mab-21 domain containing 2                                                  | 38.67662 | 34.34052 | 37.65997 | 40.30676 | 31.49847 | 29.97047 |
| 17397740 | Mab21l1      | mab-21-like 1 (C. elegans)                                                  | 5.455721 | 3.613583 | 3.506715 | 3.479717 | 4.253233 | 4.08153  |
| 17406456 | Mab21l2      | mab-21-like 2 (C. elegans)                                                  | 5.919847 | 6.012271 | 4.647678 | 6.109439 | 6.725866 | 4.312038 |
| 17408536 | Mab21l3      | mab-21-like 3 (C. elegans)                                                  | 7.405463 | 11.0742  | 9.881911 | 8.701596 | 8.701596 | 10.45253 |
| 17357004 | Macrodl      | MACRO domain containing 1                                                   | 45.32484 | 48.51066 | 52.09453 | 54.46774 | 46.16668 | 61.34994 |
| 17376933 | Macrodl2     | MACRO domain containing 2                                                   | 4.224908 | 5.379082 | 4.800385 | 4.39624  | 5.029099 | 4.948599 |
| 17392268 | Macro2os2    | MACRO domain containing 2, opposite strand 2 [Source:MGI Symbol;Acc:MGI:365 | 4.243427 | 4.888019 | 4.214379 | 4.686562 | 3.555568 | 4.238959 |
| 17436427 | Maea         | macrophage erythroblast attacher                                            | 68.24872 | 68.45576 | 78.34069 | 67.8619  | 70.84038 | 56.37056 |
| 17357810 | Mpeg1        | macrophage expressed gene 1                                                 | 121.1231 | 104.2678 | 132.8496 | 120.8271 | 157.3017 | 130.3982 |
| 17251959 | Mgl2         | macrophage galactose N-acetyl-galactosamine specific lectin 2               | 5.413006 | 4.344921 | 4.002025 | 4.707757 | 4.521621 | 3.859115 |
| 17241962 | Mif          | macrophage migration inhibitory factor                                      | 186.7714 | 222.9197 | 257.5734 | 209.0277 | 195.0987 | 164.2261 |
| 17226327 | Marco        | macrophage receptor with collagenous structure                              | 72.67262 | 116.0393 | 208.8264 | 60.43699 | 57.35073 | 30.4405  |
| 17508850 | Msr1         | macrophage scavenger receptor 1                                             | 39.94713 | 40.63835 | 43.81704 | 28.71634 | 32.28227 | 23.35339 |
| 17521625 | Mst1         | macrophage stimulating 1 (hepatocyte growth factor-like)                    | 147.8705 | 132.9611 | 134.9003 | 152.2364 | 182.1067 | 151.8318 |
| 17521485 | Mst1r        | macrophage stimulating 1 receptor (c-met-related tyrosine kinase)           | 7.743898 | 9.546487 | 8.409442 | 7.448036 | 7.311513 | 7.637074 |
| 17454521 | Mad1l1       | MAD1 mitotic arrest deficient 1-like 1                                      | 23.69449 | 19.62853 | 20.61782 | 20.61782 | 20.61782 | 20.29891 |
| 17459236 | Mad2l1       | MAD2 mitotic arrest deficient-like 1                                        | 8.328115 | 8.87914  | 9.595846 | 11.02846 | 6.039085 | 8.226165 |
| 17421571 | Mad2l2       | MAD2 mitotic arrest deficient-like 2                                        | 48.91279 | 41.4207  | 50.36955 | 47.49389 | 56.52276 | 67.644   |
| 17345315 | Mad2l1bp     | MAD2L1 binding protein                                                      | 12.35189 | 12.79555 | 11.54439 | 13.39368 | 10.87301 | 12.28725 |
| 17229315 | Mael         | maelstrom homolog (Drosophila)                                              | 2.558166 | 3.345264 | 3.345264 | 2.953407 | 3.009972 | 3.09616  |
| 17351687 | Mro          | maestro                                                                     | 3.894991 | 4.439262 | 4.20927  | 4.327879 | 3.979563 | 4.228864 |
| 17312427 | Mroh1        | maestro heat-like repeat family member 1                                    | 35.70316 | 39.01697 | 36.96121 | 29.33355 | 34.85926 | 36.87906 |
| 17215462 | Mroh2a       | maestro heat-like repeat family member 2A                                   | 4.721843 | 5.56106  | 5.235982 | 5.927074 | 5.56106  | 5.56106  |
| 17309853 | Mroh2b       | maestro heat-like repeat family member 2B                                   | 5.60817  | 4.722727 | 4.630603 | 4.694951 | 4.24902  | 4.826308 |
| 17227436 | Mroh3        | maestro heat-like repeat family member 3                                    | 5.979356 | 7.173763 | 5.879853 | 5.829087 | 5.447333 | 5.732323 |
| 17317952 | Mroh4        | maestro heat-like repeat family member 4                                    | 3.766593 | 4.402521 | 4.042646 | 4.20927  | 3.663163 | 4.430532 |
| 17317925 | Mroh5        | maestro heat-like repeat family member 5                                    | 7.470009 | 6.760032 | 6.080837 | 7.733706 | 6.072582 | 6.638328 |
| 17317930 | Mroh5        | maestro heat-like repeat family member 5                                    | 11.00128 | 10.55409 | 10.66876 | 12.41162 | 8.469754 | 11.3437  |
| 17318179 | Mroh6        | maestro heat-like repeat family member 6                                    | 8.467112 | 8.467112 | 9.241391 | 8.254667 | 7.935109 | 8.467112 |
| 17427833 | Mroh7        | maestro heat-like repeat family member 7                                    | 4.401362 | 5.187898 | 4.64742  | 5.614704 | 5.370513 | 7.040803 |
| 17393709 | Mroh8        | maestro heat-like repeat family member 8                                    | 4.742968 | 6.655652 | 4.327579 | 4.694951 | 4.524192 | 4.886969 |
| 17229070 | Mroh9        | maestro heat-like repeat family member 9                                    | 2.708286 | 2.941618 | 3.009972 | 3.009972 | 3.713836 | 3.009972 |
| 17312405 | Maf1         | MAF1 homolog (S. cerevisiae)                                                | 17.81055 | 23.11248 | 21.00528 | 23.97402 | 22.36127 | 22.44932 |
| 17539888 | Magix        | MAGI family member, X-linked                                                | 18.87415 | 17.03606 | 17.38041 | 20.49685 | 23.66085 | 22.12185 |
| 17543974 | Magt1        | magnesium transporter 1                                                     | 239.6807 | 151.2069 | 155.9825 | 155.164  | 170.4849 | 185.6987 |
| 17306775 | Mdp1         | magnesium-dependent phosphatase 1                                           | 27.77933 | 28.34181 | 27.13758 | 33.1765  | 31.51594 | 34.29485 |
| 17416566 | Magoh        | mago homolog, exon junction complex core component                          | 34.55063 | 28.89865 | 27.55247 | 27.1903  | 27.70319 | 28.21323 |
| 17471840 | Magohb       | mago-nashi homolog B (Drosophila)                                           | 5.8219   | 5.422582 | 4.20927  | 3.579728 | 3.716437 | 3.872298 |
| 17322600 | Mgrn1        | mahogunin, ring finger 1                                                    | 75.80494 | 87.60553 | 97.5304  | 82.18311 | 87.16578 | 98.45892 |
| 17476622 | LOC102635992 | major allergen I polypeptide chain 1-like                                   | 2.332117 | 2.332117 | 2.002289 | 2.334332 | 2.279157 | 2.059123 |
| 17476643 | LOC102637163 | major allergen I polypeptide chain 1-like                                   | 5.607548 | 6.160767 | 5.922762 | 5.548009 | 6.995562 | 5.170128 |
| 17398180 | Mfsd1        | major facilitator superfamily domain containing 1                           | 190.9935 | 188.4686 | 157.4391 | 173.9839 | 179.4502 | 162.1123 |
| 17447269 | Mfsd10       | major facilitator superfamily domain containing 10                          | 25.99136 | 24.97928 | 24.99989 | 19.43399 | 32.74789 | 25.36118 |
| 17258664 | Mfsd11       | major facilitator superfamily domain containing 11                          | 33.91661 | 33.05531 | 29.38565 | 27.85028 | 25.516   | 31.45963 |
| 17235701 | Mfsd12       | major facilitator superfamily domain containing 12                          | 21.49471 | 21.49471 | 25.44517 | 26.51818 | 18.19197 | 20.56558 |
| 17429632 | Mfsd2a       | major facilitator superfamily domain containing 2A                          | 271.4288 | 414.1444 | 323.9147 | 237.3628 | 215.9974 | 248.9496 |
| 17279864 | Mfsd2b       | major facilitator superfamily domain containing 2B                          | 7.287682 | 7.143098 | 7.891448 | 6.213129 | 6.833146 | 7.124309 |
| 17312581 | Mfsd3        | major facilitator superfamily domain containing 3                           | 16.14371 | 17.23752 | 21.94423 | 17.6306  | 20.76612 | 19.6254  |
| 17226829 | Mfsd4        | major facilitator superfamily domain containing 4                           | 8.467112 | 10.67778 | 7.903655 | 8.535348 | 7.048763 | 7.054041 |
| 17315349 | Mfsd5        | major facilitator superfamily domain containing 5                           | 24.0933  | 29.1483  | 27.38398 | 35.52937 | 23.18291 | 17.10896 |
| 17222925 | Mfsd6        | major facilitator superfamily domain containing 6                           | 42.57722 | 35.32138 | 34.49942 | 27.75643 | 26.66453 | 21.40936 |
| 17251354 | Mfsd6l       | major facilitator superfamily domain containing 6-like                      | 7.738908 | 7.201613 | 7.73687  | 7.228368 | 6.26876  | 6.684316 |
| 17450748 | Mfsd7a       | major facilitator superfamily domain containing 7A                          | 5.927197 | 10.39091 | 10.29905 | 12.71553 | 9.683711 | 10.34126 |
| 17231003 | Mfsd7b       | major facilitator superfamily domain containing 7B                          | 11.64711 | 12.06612 | 12.17585 | 11.05058 | 12.49406 | 11.37709 |
| 17277411 | Mfsd7c       | major facilitator superfamily domain containing 7C                          | 14.57749 | 19.01479 | 18.88344 | 19.10913 | 18.55196 | 20.33552 |
| 17404976 | Mfsd8        | major facilitator superfamily domain containing 8                           | 35.71801 | 23.34659 | 23.06686 | 25.92299 | 19.07115 | 25.54342 |
| 17222606 | Mfsd9        | major facilitator superfamily domain containing 9                           | 8.162607 | 9.361307 | 9.784038 | 7.701503 | 6.62927  | 7.867689 |
| 17228353 | Mr1          | major histocompatibility complex, class I-related                           | 23.69449 | 30.05744 | 28.00262 | 23.69449 | 19.21978 | 16.97042 |
| 17238318 | Mip          | major intrinsic protein of lens fiber                                       | 5.254706 | 5.110307 | 5.289678 | 5.838145 | 5.110307 | 5.77868  |
| 17425941 | Mup1         | major urinary protein 1                                                     | 6289.938 | 5658.877 | 5241.013 | 6510.037 | 5856.65  | 5575.402 |
| 17425954 | Mup10        | major urinary protein 10                                                    | 1043.656 | 723.3149 | 692.5431 | 989.0365 | 567.6981 | 676.8911 |
| 17425978 | Mup12        | major urinary protein 12                                                    | 3194.734 | 2866.332 | 2523.01  | 3204.914 | 2957.065 | 2620.107 |
| 17426000 | Mup13        | major urinary protein 13                                                    | 6309.238 | 6326.755 | 5917.409 | 6549.822 | 6322.327 | 6194.362 |
| 17426011 | Mup14        | major urinary protein 14                                                    | 6444.488 | 6197.626 | 5693.026 | 6790.678 | 6223.757 | 6001.303 |
| 17426022 | Mup15        | major urinary protein 15                                                    | 6745.455 | 6310.287 | 5951.922 | 6686.243 | 6356.514 | 6033.168 |
| 17426032 | Mup16        | major urinary protein 16                                                    | 4847.348 | 4466.317 | 4001.874 | 4905.383 | 4279.777 | 4175.548 |
| 17426043 | Mup18        | major urinary protein 18                                                    | 6689.349 | 6205.363 | 5851.74  | 6597.94  | 6296.481 | 6148.718 |
| 17426062 | Mup19        | major urinary protein 19                                                    | 6271.566 | 6262.617 | 5803.832 | 6813.782 | 6336.147 | 6129.909 |
| 17425900 | Mup2         | major urinary protein 2                                                     | 4743.644 | 4398.97  | 4292.374 | 5166.602 | 4743.644 | 4654.273 |
| 17426086 | Mup20        | major urinary protein 20                                                    | 4074.649 | 3131.526 | 1760.598 | 3802.625 | 3406.466 | 2537.145 |
| 17426108 | Mup21        | major urinary protein 21                                                    | 94.31531 | 14.99334 | 3.139381 | 40.91421 | 30.40338 | 37.99374 |
| 17426097 | Mup3         | major urinary protein 3                                                     | 6253.985 | 4157.412 | 2856.217 | 5159.015 | 5004.603 | 4090.808 |

|          |           |                                                             |          |          |          |          |          |          |
|----------|-----------|-------------------------------------------------------------|----------|----------|----------|----------|----------|----------|
| 17425878 | Mup4      | major urinary protein 4                                     | 3.462322 | 3.070301 | 2.271885 | 2.287164 | 2.782767 | 4.675109 |
| 17426076 | Mup5      | major urinary protein 5                                     | 5.931677 | 4.922291 | 5.354233 | 6.555883 | 9.310251 | 6.607205 |
| 17414497 | Mup6      | major urinary protein 6                                     | 9.917593 | 6.699948 | 3.427294 | 8.654257 | 6.058119 | 4.564162 |
| 17425888 | Mup7      | major urinary protein 7                                     | 6183.809 | 5636.563 | 5399.799 | 6623.05  | 6039.318 | 5825.879 |
| 17425915 | Mup8      | major urinary protein 8                                     | 6191.572 | 6013.545 | 5469.601 | 6583.55  | 6066.674 | 5828.504 |
| 17425926 | Mup9      | major urinary protein 9                                     | 326.8557 | 282.0232 | 201.5467 | 415.1733 | 245.2314 | 228.3875 |
| 17414512 | Mup-ps12  | major urinary protein, pseudogene 12                        | 33.14892 | 47.26663 | 60.8831  | 82.9477  | 60.14946 | 91.65489 |
| 17414520 | Mup-ps16  | major urinary protein, pseudogene 16                        | 63.8436  | 66.59814 | 81.00955 | 126.1704 | 110.5067 | 131.7766 |
| 17496514 | Mvp       | major vault protein                                         | 64.82552 | 75.49452 | 71.40088 | 56.35259 | 53.77635 | 55.20052 |
| 17508593 | Mak16     | MAK16 homolog (S. cerevisiae)                               | 32.49194 | 25.22776 | 22.69716 | 22.29163 | 25.12793 | 22.94328 |
| 17469887 | Mkrn2os   | makorin, ring finger protein 2, opposite strand             | 94.09656 | 97.23205 | 112.1612 | 99.24758 | 73.92959 | 94.09656 |
| 17466119 | Mkrn1     | makorin, ring finger protein, 1                             | 13.08852 | 13.00839 | 13.01046 | 12.86955 | 11.78672 | 14.09684 |
| 17461968 | Mkrn2     | makorin, ring finger protein, 2                             | 24.82772 | 24.84976 | 25.64703 | 32.19489 | 33.85319 | 35.79311 |
| 17491755 | Mkrn3     | makorin, ring finger protein, 3                             | 5.002399 | 4.267142 | 3.627762 | 5.048133 | 3.735186 | 6.147714 |
| 17311512 | Mal2      | mal, T cell differentiation protein 2                       | 192.6916 | 116.7695 | 109.6947 | 143.4148 | 125.5362 | 117.0021 |
| 17391339 | Mall      | mal, T cell differentiation protein-like                    | 4.771358 | 4.037186 | 3.729055 | 3.297745 | 3.729055 | 4.980567 |
| 17260944 | Mdh1      | malate dehydrogenase 1, NAD (soluble)                       | 848.8466 | 768.4566 | 720.0733 | 791.9964 | 737.5311 | 937.0875 |
| 17223747 | Mdh1b     | malate dehydrogenase 1B, NAD (soluble)                      | 3.097448 | 2.789932 | 3.274308 | 3.003386 | 3.687262 | 2.967463 |
| 17443310 | Mdh2      | malate dehydrogenase 2, NAD (mitochondrial)                 | 388.7503 | 450.1057 | 555.8455 | 421.6085 | 339.0326 | 426.0031 |
| 17338168 | Mea1      | male enhanced antigen 1                                     | 54.081   | 53.21533 | 55.10648 | 50.37025 | 50.24402 | 50.68159 |
| 17292032 | Mak       | male germ cell-associated kinase                            | 4.763791 | 3.999141 | 5.06429  | 4.186167 | 4.566124 | 5.002295 |
| 17451668 | Mlec      | malectin                                                    | 252.0454 | 226.3451 | 239.8602 | 183.339  | 154.7033 | 145.2808 |
| 17256162 | Msl1      | male-specific lethal 1 homolog (Drosophila)                 | 25.3749  | 35.31453 | 38.33765 | 37.66389 | 48.78954 | 50.15286 |
| 17520815 | Msl2      | male-specific lethal 2 homolog (Drosophila)                 | 109.735  | 115.7028 | 96.8614  | 91.46513 | 86.94192 | 89.91376 |
| 17546160 | Msl3      | male-specific lethal 3 homolog (Drosophila)                 | 99.84858 | 91.33083 | 93.97727 | 112.4149 | 124.5723 | 108.0167 |
| 17233342 | Msl3l2    | male-specific lethal 3-like 2 (Drosophila)                  | 12.69985 | 11.19071 | 8.024547 | 10.83224 | 12.62157 | 8.830836 |
| 17529398 | Me1       | malic enzyme 1, NADP(+)-dependent, cytosolic                | 341.6843 | 266.1157 | 244.1713 | 251.5724 | 165.1874 | 236.809  |
| 17355391 | Me2       | malic enzyme 2, NADP(+)-dependent, mitochondrial            | 14.00966 | 12.29773 | 15.60796 | 10.28179 | 13.11849 | 13.39423 |
| 17480048 | Me3       | malic enzyme 3, NADP(+)-dependent, mitochondrial            | 3.768159 | 5.379007 | 5.156206 | 2.834983 | 2.477371 | 3.861737 |
| 17500551 | Mfh5a1    | malignant fibrous histiocyctoma amplified sequence 1        | 48.04585 | 37.3633  | 38.4108  | 33.89475 | 31.85129 | 39.30797 |
| 17534352 | Mcts1     | malignant T cell amplified sequence 1                       | 24.09013 | 22.5496  | 23.48536 | 28.71276 | 19.26994 | 28.4473  |
| 17377774 | Mcts2     | malignant T cell amplified sequence 2                       | 15.84065 | 14.33281 | 11.99241 | 15.02559 | 15.18821 | 14.13627 |
| 17319864 | Mcat      | malonyl CoA:ACP acyltransferase (mitochondrial)             | 57.74844 | 51.10314 | 41.15769 | 41.28398 | 43.88968 | 50.6542  |
| 17506073 | Mlycd     | malonyl-CoA decarboxylase                                   | 67.97395 | 63.65491 | 59.91478 | 74.32677 | 66.52801 | 62.669   |
| 17351330 | Malt1     | MALT1 paracaspase                                           | 21.94302 | 21.69243 | 21.82213 | 20.26797 | 23.88959 | 23.96455 |
| 17457609 | Mgam      | maltase-glucoamylase                                        | 196.1903 | 183.2615 | 169.6279 | 190.2378 | 183.0444 | 190.2378 |
| 17367203 | Malrd1    | MAM and LDL receptor class A domain containing 1            | 3.565835 | 3.381258 | 3.381258 | 3.381258 | 3.381258 | 3.47774  |
| 17367209 | Malrd1    | MAM and LDL receptor class A domain containing 1            | 3.736247 | 2.831644 | 2.831644 | 3.054974 | 2.748225 | 2.619806 |
| 17363533 | Mamdc2    | MAM domain containing 2                                     | 6.860863 | 8.870282 | 8.612129 | 8.295679 | 6.890459 | 8.096565 |
| 17382638 | Mamdc4    | MAM domain containing 4                                     | 6.506628 | 6.429382 | 6.071109 | 6.920998 | 5.481687 | 6.429382 |
| 17343088 | Mdga1     | MAM domain containing glycosylphosphatidylinositol anchor 1 | 7.042316 | 5.368615 | 5.582533 | 6.42417  | 8.119045 | 6.521799 |
| 17281459 | Mdga2     | MAM domain containing glycosylphosphatidylinositol anchor 2 | 3.779145 | 3.656187 | 3.656187 | 3.686444 | 3.18656  | 4.453779 |
| 17329403 | Masp1     | mannan-binding lectin serine peptidase 1                    | 198.6617 | 174.6194 | 160.8386 | 163.4482 | 198.6961 | 151.4859 |
| 17421704 | Masp2     | mannan-binding lectin serine peptidase 2                    | 434.7433 | 489.1455 | 492.5137 | 480.5291 | 447.0493 | 457.5546 |
| 17527532 | Mpi       | mannose phosphate isomerase                                 | 20.46164 | 21.0264  | 16.16453 | 17.39644 | 10.90335 | 15.62257 |
| 17367102 | Mrc1      | mannose receptor, C type 1                                  | 114.7349 | 123.2975 | 149.9482 | 112.239  | 85.85082 | 102.945  |
| 17257361 | Mrc2      | mannose receptor, C type 2                                  | 8.674917 | 7.753835 | 9.10406  | 11.42997 | 8.67119  | 9.109614 |
| 17462647 | M6pr      | mannose-6-phosphate receptor, cation dependent              | 112.5241 | 146.545  | 141.9609 | 121.5023 | 136.3102 | 130.3078 |
| 17298977 | Mbl1      | mannose-binding lectin (protein A) 1                        | 292.2218 | 280.3043 | 249.5422 | 293.1977 | 260.1572 | 229.1232 |
| 17358640 | Mbl2      | mannose-binding lectin (protein C) 2                        | 460.5998 | 485.9183 | 423.5798 | 379.3853 | 609.1104 | 491.6303 |
| 17264824 | Mpdu1     | mannose-P-dolichol utilization defect 1                     | 135.1146 | 142.2091 | 151.2719 | 130.4551 | 140.0929 | 153.3995 |
| 17240880 | Man1a     | mannosidase 1, alpha                                        | 281.9724 | 240.9684 | 233.5455 | 238.8283 | 218.326  | 244.9681 |
| 17339108 | Man2a1    | mannosidase 2, alpha 1                                      | 285.2217 | 339.3923 | 363.2956 | 326.473  | 385.6611 | 352.7617 |
| 17492549 | Man2a2    | mannosidase 2, alpha 2                                      | 54.64017 | 66.50219 | 80.67613 | 59.96422 | 56.91196 | 60.15864 |
| 17503397 | Man2b1    | mannosidase 2, alpha B1                                     | 98.85829 | 94.24734 | 93.39672 | 92.65969 | 95.24094 | 96.55573 |
| 17447514 | Man2b2    | mannosidase 2, alpha B2                                     | 88.45121 | 92.08537 | 107.2653 | 92.25019 | 72.16113 | 64.4255  |
| 17408422 | Man1a2    | mannosidase, alpha, class 1A, member 2                      | 64.77522 | 61.96106 | 57.02134 | 59.06125 | 62.87741 | 60.52419 |
| 17367926 | Man1b1    | mannosidase, alpha, class 1B, member 1                      | 31.53364 | 28.56427 | 25.25523 | 25.44323 | 28.08738 | 22.36235 |
| 17431332 | Man1c1    | mannosidase, alpha, class 1C, member 1                      | 18.97871 | 13.97639 | 19.53122 | 15.24326 | 8.236149 | 13.08262 |
| 17517659 | Man2c1    | mannosidase, alpha, class 2C, member 1                      | 13.45873 | 17.1207  | 17.55111 | 17.55111 | 16.685   | 14.22493 |
| 17527474 | Man2c1os  | mannosidase, alpha, class 2C, member 1, opposite strand     | 3.627762 | 3.608277 | 3.584421 | 4.855299 | 5.216637 | 4.170239 |
| 17402905 | Manba     | mannosidase, beta A, lysosomal                              | 45.34589 | 43.16111 | 43.16111 | 37.59268 | 38.89142 | 36.86219 |
| 17378716 | Manbal    | mannosidase, beta A, lysosomal-like                         | 32.44918 | 41.31031 | 51.31576 | 48.58166 | 41.27654 | 43.46614 |
| 17423713 | Manea     | mannosidase, endo-alpha                                     | 117.1497 | 111.5611 | 105.0957 | 116.611  | 109.9253 | 110.3919 |
| 17429886 | Maneal    | mannosidase, endo-alpha-like                                | 8.365258 | 9.408013 | 7.394487 | 9.294711 | 7.935659 | 8.2142   |
| 17248941 | Mgat1     | mannoside acetylglucosaminyltransferase 1                   | 24.86458 | 26.76118 | 24.42082 | 30.22771 | 26.76118 | 31.77522 |
| 17275882 | Mgat2     | mannoside acetylglucosaminyltransferase 2                   | 137.9747 | 77.35861 | 84.00481 | 88.23566 | 88.40402 | 82.43242 |
| 17313087 | Mgat3     | mannoside acetylglucosaminyltransferase 3                   | 5.964536 | 8.269385 | 5.746924 | 5.743937 | 5.494393 | 5.766876 |
| 17222332 | Mgat4a    | mannoside acetylglucosaminyltransferase 4, isoenzyme A      | 4.431392 | 3.564081 | 3.32446  | 3.649832 | 4.752478 | 4.15803  |
| 17249151 | Mgat4b    | mannoside acetylglucosaminyltransferase 4, isoenzyme B      | 27.95491 | 32.00244 | 32.73949 | 28.82682 | 30.89754 | 26.30454 |
| 17216753 | Mgat5     | mannoside acetylglucosaminyltransferase 5                   | 28.90526 | 26.34541 | 25.5911  | 20.96659 | 27.45753 | 17.22904 |
| 17258683 | Mgat5b    | mannoside acetylglucosaminyltransferase 5, isoenzyme B      | 6.790275 | 7.129496 | 6.570303 | 6.88263  | 6.347375 | 6.974501 |
| 17459952 | Mogs      | mannosyl-oligosaccharide glucosidase                        | 43.52885 | 29.36102 | 25.08182 | 24.29454 | 33.20434 | 29.36102 |
| 17472023 | Mansc1    | MANSC domain containing 1                                   | 9.950783 | 8.717473 | 8.09174  | 9.02627  | 9.259986 | 7.705187 |
| 17472893 | Mansc4    | MANSC domain containing 4                                   | 10.83945 | 8.6233   | 8.500042 | 10.10089 | 6.781385 | 9.55271  |
| 17226736 | Mapkapk2  | MAP kinase-activated protein kinase 2                       | 118.554  | 139.6537 | 163.8316 | 139.2844 | 156.5598 | 158.588  |
| 17452209 | Mapkapk5  | MAP kinase-activated protein kinase 5                       | 42.56011 | 51.53248 | 54.90745 | 52.32215 | 46.35587 | 58.56107 |
| 17417314 | Mknk1     | MAP kinase-interacting serine/threonine kinase 1            | 15.87066 | 14.21035 | 18.3872  | 17.3668  | 14.5341  | 12.60112 |
| 17243034 | Mknk2     | MAP kinase-interacting serine/threonine kinase 2            | 119.6395 | 179.039  | 196.2053 | 154.2568 | 180.4331 | 205.9742 |
| 17230760 | Mark1     | MAP/microtubule affinity regulating kinase 1                | 5.418599 | 6.060765 | 7.018389 | 5.614548 | 6.253787 | 7.003956 |
| 17346004 | Mark1-ps1 | MAP/microtubule affinity regulating kinase 1, pseudogene 1  | 3.284537 | 2.414342 | 3.194987 | 2.757632 | 2.793977 | 2.503298 |
| 17362289 | Mark2     | MAP/microtubule affinity regulating kinase 2                | 35.01085 | 31.03749 | 39.37314 | 35.16577 | 35.4922  | 29.71563 |
| 17279169 | Mark3     | MAP/microtubule affinity regulating kinase 3                | 101.1912 | 97.68059 | 94.23493 | 103.0607 | 90.43567 | 91.59519 |
| 17487249 | Mark4     | MAP/microtubule affinity regulating kinase 4                | 29.84899 | 25.96111 | 34.54153 | 26.36112 | 23.67791 | 30.86714 |

|          |              |                                                                                 |          |          |          |          |          |          |
|----------|--------------|---------------------------------------------------------------------------------|----------|----------|----------|----------|----------|----------|
| 17281280 | Mbip         | MAP3K12 binding inhibitory protein 1                                            | 19.69708 | 14.10515 | 13.48637 | 12.75932 | 14.68773 | 16.54427 |
| 17326887 | Map3k7cl     | Map3k7 C-terminal like                                                          | 5.587179 | 4.222215 | 5.450845 | 5.375877 | 3.5801   | 3.473861 |
| 17329074 | Map6d1       | MAP6 domain containing 1                                                        | 6.426708 | 7.456197 | 6.24482  | 7.19044  | 5.838226 | 8.076947 |
| 17430006 | Map7d1       | MAP7 domain containing 1                                                        | 49.28648 | 46.75212 | 58.30388 | 36.51228 | 39.98508 | 39.89622 |
| 17539167 | Map7d2       | MAP7 domain containing 2                                                        | 3.490249 | 3.842273 | 4.070737 | 3.631612 | 3.755175 | 3.755175 |
| 17541856 | Mtap7d3      | MAP7 domain containing 3                                                        | 3.54506  | 3.54506  | 3.887681 | 3.54506  | 3.140621 | 3.54506  |
| 17388128 | Madd         | MAP-kinase activating death domain                                              | 15.70226 | 12.50333 | 15.70226 | 16.30158 | 17.91381 | 14.15981 |
| 17419020 | Marcks1      | MARCKS-like 1                                                                   | 20.40739 | 20.29525 | 21.60899 | 20.29525 | 18.72235 | 21.83847 |
| 17284963 | Marcksl1-ps4 | MARCKS-like 1, pseudogene 4                                                     | 20.87494 | 40.73819 | 31.03878 | 26.3966  | 13.46554 | 19.0082  |
| 17353619 | Mzb1         | marginal zone B and B1 cell-specific protein 1                                  | 7.570402 | 10.03501 | 12.45092 | 10.27709 | 8.063745 | 8.708293 |
| 17359531 | Marveld1     | MARVEL (membrane-associating) domain containing 1                               | 34.25327 | 35.41037 | 44.00087 | 40.24646 | 32.62645 | 36.68606 |
| 17295685 | Marveld2     | MARVEL (membrane-associating) domain containing 2                               | 31.38515 | 35.91663 | 31.3206  | 35.83481 | 39.81582 | 38.0512  |
| 17512860 | Marveld3     | MARVEL (membrane-associating) domain containing 3                               | 10.53881 | 9.734184 | 8.319864 | 7.935109 | 7.935109 | 7.935109 |
| 17340902 | Mas1         | MAS1 oncogene                                                                   | 6.908775 | 6.032015 | 5.602691 | 6.472621 | 5.54624  | 3.748517 |
| 17491318 | Mrgpra1      | MAS-related GPR, member A1                                                      | 31.49738 | 59.13458 | 50.65525 | 31.56754 | 55.38487 | 37.042   |
| 17491323 | Mrgpra2a     | MAS-related GPR, member A2A                                                     | 2.70133  | 3.436905 | 2.685238 | 2.84966  | 3.756685 | 3.477788 |
| 17491329 | Mrgpra2b     | MAS-related GPR, member A2B                                                     | 6.07195  | 5.780603 | 4.720108 | 5.410568 | 5.179992 | 5.67197  |
| 17491335 | Mrgpra3      | MAS-related GPR, member A3                                                      | 3.131296 | 2.661279 | 2.914402 | 3.073452 | 3.167292 | 3.114693 |
| 17491340 | Mrgpra4      | MAS-related GPR, member A4                                                      | 2.234094 | 2.853713 | 2.591397 | 2.591397 | 2.745236 | 2.60821  |
| 17491310 | Mrgpra6      | MAS-related GPR, member A6                                                      | 2.983488 | 1.83933  | 2.120376 | 1.924749 | 2.465329 | 2.07661  |
| 17491315 | Mrgpra9      | MAS-related GPR, member A9                                                      | 4.176313 | 3.224465 | 3.02738  | 3.727272 | 3.555716 | 2.763641 |
| 17491354 | Mrgprb1      | MAS-related GPR, member B1                                                      | 3.250699 | 2.7808   | 2.49258  | 2.82306  | 2.443129 | 2.628227 |
| 17548579 | Mrgprb13     | MAS-related GPR, member B13                                                     | 3.479428 | 2.931035 | 3.673003 | 4.195957 | 3.971929 | 3.389894 |
| 17491362 | Mrgprb2      | MAS-related GPR, member B2                                                      | 2.243218 | 3.203791 | 2.733198 | 2.781937 | 2.735283 | 2.752934 |
| 17491366 | Mrgprb3      | MAS-related GPR, member B3                                                      | 2.972486 | 2.497994 | 3.075732 | 3.348976 | 3.012999 | 2.948457 |
| 17491352 | Mrgprb4      | MAS-related GPR, member B4                                                      | 2.900899 | 2.062137 | 2.633808 | 2.719271 | 3.173115 | 2.719271 |
| 17491349 | Mrgprb5      | MAS-related GPR, member B5                                                      | 2.273224 | 2.104518 | 2.443078 | 2.681648 | 2.817528 | 2.036596 |
| 17478273 | Mrgprb8      | MAS-related GPR, member B8                                                      | 2.890081 | 2.464884 | 2.482132 | 2.304206 | 2.604543 | 2.137701 |
| 17485471 | Mrgprd       | MAS-related GPR, member D                                                       | 3.062691 | 3.403832 | 3.293885 | 3.759498 | 3.062691 | 3.045819 |
| 17498365 | Mrgpre       | MAS-related GPR, member E                                                       | 11.747   | 12.09442 | 15.07964 | 9.898363 | 15.5925  | 11.10987 |
| 17485462 | Mrgprf       | MAS-related GPR, member F                                                       | 5.253468 | 5.63955  | 8.05369  | 5.68488  | 4.860989 | 6.695538 |
| 17498360 | Mrgprg       | MAS-related GPR, member G                                                       | 12.81623 | 11.24436 | 12.53708 | 12.05651 | 13.17262 | 10.94432 |
| 17333320 | Mrgprh       | MAS-related GPR, member H                                                       | 3.664331 | 3.497927 | 3.095795 | 3.808888 | 3.615337 | 3.863397 |
| 17491344 | Mrgprx1      | MAS-related GPR, member X1                                                      | 2.524469 | 2.431792 | 2.497977 | 2.167843 | 2.812903 | 2.724138 |
| 17491358 | Mrgprx2      | MAS-related GPR, member X2                                                      | 6.139155 | 5.545279 | 5.125703 | 4.801649 | 5.125739 | 6.454476 |
| 17498730 | Mcemp1       | mast cell expressed membrane protein 1                                          | 10.28949 | 10.56016 | 8.446947 | 10.35022 | 9.44637  | 10.44326 |
| 17257599 | Milr1        | mast cell immunoglobulin like receptor 1                                        | 5.028332 | 4.300219 | 5.450241 | 4.730065 | 4.53386  | 4.801616 |
| 17300717 | Mcpt1        | mast cell protease 1                                                            | 4.135409 | 4.708345 | 4.282283 | 3.978901 | 4.685295 | 5.346038 |
| 17300725 | Mcpt2        | mast cell protease 2                                                            | 2.803191 | 2.948763 | 2.941068 | 2.761132 | 2.83031  | 2.704009 |
| 17306960 | Mcpt4        | mast cell protease 4                                                            | 2.406006 | 2.997937 | 2.391689 | 2.406006 | 2.057454 | 2.464013 |
| 17306968 | Mcpt8        | mast cell protease 8                                                            | 4.287064 | 3.853475 | 3.977688 | 4.207899 | 4.69199  | 4.743165 |
| 17306952 | Mcpt9        | mast cell protease 9                                                            | 4.566884 | 3.071812 | 3.229789 | 2.691947 | 4.352065 | 2.513696 |
| 17306945 | Mcpt-ps1     | mast cell protease, pseudogene 1                                                | 5.125597 | 5.813109 | 5.48933  | 7.630777 | 6.261594 | 5.865931 |
| 17262326 | Maml1        | mastermind like 1 (Drosophila)                                                  | 30.02724 | 20.47356 | 22.0163  | 20.82537 | 19.04816 | 19.93871 |
| 17514678 | Maml2        | mastermind like 2 (Drosophila)                                                  | 10.89973 | 9.658439 | 13.80855 | 13.31057 | 10.14186 | 10.23522 |
| 17405154 | Maml3        | mastermind like 3 (Drosophila)                                                  | 4.681043 | 8.596861 | 10.21629 | 7.596    | 8.398548 | 6.663545 |
| 17535284 | Maml1d1      | mastermind-like domain containing 1                                             | 9.326657 | 10.20617 | 12.99334 | 9.995093 | 11.57331 | 10.41528 |
| 17413528 | Melk         | maternal embryonic leucine zipper kinase                                        | 3.865996 | 3.815547 | 3.729055 | 4.23118  | 3.729055 | 3.729055 |
| 17278662 | Meg3         | maternally expressed 3                                                          | 12.93717 | 12.93717 | 12.93717 | 12.61344 | 12.07147 | 12.02312 |
| 17419305 | Matn1        | matrilin 1, cartilage matrix protein                                            | 3.452856 | 4.838869 | 3.949965 | 3.652514 | 3.83384  | 4.22482  |
| 17310922 | Matn2        | matrilin 2                                                                      | 9.310251 | 9.015578 | 9.310251 | 10.58222 | 7.673794 | 8.788031 |
| 17273973 | Matn3        | matrilin 3                                                                      | 6.451166 | 9.228141 | 6.328353 | 7.949092 | 7.721119 | 9.883486 |
| 17394160 | Matn4        | matrilin 4                                                                      | 4.74698  | 4.379056 | 4.065858 | 3.391327 | 3.9469   | 3.872566 |
| 17349554 | Matr3        | matrin 3                                                                        | 108.3511 | 110.0923 | 97.05227 | 93.50943 | 109.564  | 107.223  |
| 17439825 | Mepe         | matrix extracellular phosphoglycoprotein with ASARM motif (bone)                | 9.488237 | 7.748247 | 9.413884 | 10.59602 | 10.41218 | 9.488237 |
| 17472192 | Mgp          | matrix Gla protein                                                              | 20.62468 | 22.46878 | 18.52845 | 20.35399 | 18.30036 | 20.1538  |
| 17514541 | Mmp10        | matrix metallopeptidase 10                                                      | 7.548919 | 8.123773 | 8.627186 | 7.491736 | 5.621168 | 7.920547 |
| 17514495 | Mmp12        | matrix metallopeptidase 12                                                      | 9.243697 | 10.6052  | 14.63946 | 10.36954 | 8.049784 | 9.626891 |
| 17514482 | Mmp13        | matrix metallopeptidase 13                                                      | 4.603464 | 3.863879 | 5.119986 | 5.055487 | 4.062084 | 4.455786 |
| 17300279 | Mmp14        | matrix metallopeptidase 14 (membrane-inserted)                                  | 107.1264 | 124.1482 | 150.6858 | 107.9381 | 125.0629 | 92.95883 |
| 17504293 | Mmp15        | matrix metallopeptidase 15                                                      | 61.75012 | 57.78487 | 55.93115 | 62.20678 | 43.97007 | 53.75958 |
| 17412013 | Mmp16        | matrix metallopeptidase 16                                                      | 4.239341 | 4.035311 | 4.239341 | 3.867657 | 4.413827 | 4.577659 |
| 17442887 | Mmp17        | matrix metallopeptidase 17                                                      | 7.664704 | 7.793331 | 6.70743  | 7.07598  | 7.415788 | 8.420524 |
| 17238558 | Mmp19        | matrix metallopeptidase 19                                                      | 102.2318 | 118.9721 | 111.4289 | 105.859  | 87.6523  | 86.15902 |
| 17514528 | Mmp1a        | matrix metallopeptidase 1a (interstitial collagenase)                           | 2.08917  | 2.08917  | 2.08917  | 2.08917  | 1.968968 | 2.08917  |
| 17523834 | Mmp1b        | matrix metallopeptidase 1b (interstitial collagenase)                           | 2.415011 | 2.357781 | 2.718649 | 2.326176 | 2.639912 | 3.066005 |
| 17503825 | Mmp2         | matrix metallopeptidase 2                                                       | 14.782   | 14.782   | 15.88177 | 14.782   | 14.02783 | 13.81793 |
| 17514580 | Mmp20        | matrix metallopeptidase 20 (enamelysin)                                         | 4.85678  | 5.690834 | 6.557337 | 7.684865 | 6.038541 | 6.234959 |
| 17497194 | Mmp21        | matrix metallopeptidase 21                                                      | 5.082048 | 5.719147 | 5.617157 | 5.012534 | 5.212444 | 5.54305  |
| 17433815 | Mmp23        | matrix metallopeptidase 23                                                      | 10.88184 | 13.0722  | 13.89044 | 12.15325 | 15.45177 | 11.43084 |
| 17378450 | Mmp24        | matrix metallopeptidase 24                                                      | 12.57991 | 12.14104 | 10.62455 | 10.22862 | 11.63178 | 14.96603 |
| 17341508 | Mmp25        | matrix metallopeptidase 25                                                      | 5.153991 | 5.525749 | 5.527588 | 5.525749 | 5.870852 | 6.195969 |
| 17514566 | Mmp27        | matrix metallopeptidase 27                                                      | 6.255564 | 4.332591 | 7.657853 | 6.430496 | 5.265827 | 5.590549 |
| 17266911 | Mmp28        | matrix metallopeptidase 28 (epilysin)                                           | 8.462477 | 8.625093 | 8.312601 | 8.625093 | 9.206865 | 8.625093 |
| 17514515 | Mmp3         | matrix metallopeptidase 3                                                       | 3.282853 | 3.59881  | 3.097126 | 3.097126 | 2.77214  | 3.038923 |
| 17514592 | Mmp7         | matrix metallopeptidase 7                                                       | 7.764807 | 8.467112 | 8.467112 | 8.059107 | 8.467112 | 7.758405 |
| 17514553 | Mmp8         | matrix metallopeptidase 8                                                       | 4.473426 | 4.404139 | 5.090298 | 3.919284 | 4.70003  | 4.20927  |
| 17379606 | Mmp9         | matrix metallopeptidase 9                                                       | 8.463181 | 9.182646 | 11.36543 | 11.28145 | 6.355299 | 9.452264 |
| 17272509 | Mxra7        | matrix-remodelling associated 7                                                 | 12.3394  | 11.78598 | 13.90315 | 12.71465 | 10.83495 | 16.49984 |
| 17422732 | Mxra8        | matrix-remodelling associated 8                                                 | 19.47012 | 23.6556  | 23.43495 | 21.86589 | 17.62559 | 19.96194 |
| 17433895 | Mxra8os      | matrix-remodelling associated 8, opposite strand [Source:MGI Symbol;Acc:MGI:37C | 3.062691 | 3.141514 | 3.079039 | 2.665673 | 3.362117 | 3.062691 |
| 17542815 | Mtctp1       | mature T cell proliferation 1                                                   | 5.813149 | 3.893264 | 5.466358 | 6.943774 | 6.320287 | 9.310251 |
| 17548752 | Mturn        | matrin, neural progenitor differentiation regulator homolog (Xenopus)           | 8.312774 | 6.992896 | 6.883918 | 4.567897 | 6.377186 | 6.458191 |
| 17509923 | Mau2         | MAU2 chromatid cohesion factor homolog (C. elegans)                             | 52.12993 | 70.39592 | 63.42633 | 59.82597 | 49.0299  | 54.6254  |

|          |          |                                                                              |          |          |          |          |          |          |
|----------|----------|------------------------------------------------------------------------------|----------|----------|----------|----------|----------|----------|
| 17252817 | Mnt      | max binding protein                                                          | 19.89467 | 18.48355 | 21.99906 | 21.38652 | 25.32306 | 24.99591 |
| 17468511 | Mxd1     | MAX dimerization protein 1                                                   | 32.58057 | 30.20007 | 29.92688 | 32.63482 | 37.27664 | 35.78468 |
| 17292828 | Mxd3     | Max dimerization protein 3                                                   | 7.415428 | 7.505874 | 7.484158 | 7.601057 | 8.876986 | 7.599582 |
| 17447218 | Mxd4     | Max dimerization protein 4                                                   | 69.25038 | 61.43547 | 57.5008  | 59.38967 | 64.3046  | 63.0909  |
| 17374906 | Mga      | MAX gene associated                                                          | 35.92285 | 51.33497 | 44.69991 | 41.36905 | 47.43303 | 62.11501 |
| 17360331 | Mxi1     | MAX interactor 1, dimerization protein                                       | 38.22196 | 37.96268 | 48.24341 | 39.91475 | 43.52221 | 43.46825 |
| 17282090 | Max      | Max protein                                                                  | 39.68577 | 52.2341  | 45.15081 | 43.30675 | 45.89484 | 46.45011 |
| 17256537 | Max      | Max protein                                                                  | 57.18283 | 40.3957  | 55.33882 | 45.72052 | 47.68786 | 52.35625 |
| 17255118 | Mbtd1    | mbt domain containing 1                                                      | 19.05728 | 20.97284 | 19.22978 | 20.57613 | 19.21352 | 20.57613 |
| 17541948 | Mcf2     | mcf.2 transforming sequence                                                  | 5.509686 | 6.088302 | 6.719063 | 5.197111 | 6.822167 | 6.27215  |
| 17499155 | Mcf2l    | mcf.2 transforming sequence-like                                             | 5.608558 | 5.346519 | 5.608558 | 5.608558 | 4.696448 | 4.96509  |
| 17392138 | Mkks     | McKusick-Kaufman syndrome                                                    | 29.77728 | 25.86519 | 20.32284 | 24.14462 | 22.28406 | 27.97313 |
| 17496920 | Mcmbp    | MCM (minichromosome maintenance deficient) binding protein                   | 89.8745  | 81.60129 | 85.35833 | 84.27659 | 80.6711  | 78.62139 |
| 17311602 | Mtbp     | Mdm2, transformed 3T3 cell double minute p53 binding protein                 | 3.984531 | 4.844138 | 6.347639 | 3.456711 | 4.291494 | 5.539363 |
| 17404478 | Mecom    | MDS1 and EVI1 complex locus                                                  | 5.237397 | 5.137833 | 4.972633 | 5.237397 | 4.316225 | 5.237397 |
| 17404503 | Mecom    | MDS1 and EVI1 complex locus                                                  | 3.03547  | 2.890221 | 2.943372 | 4.753269 | 3.135205 | 3.532942 |
| 17396546 | Mecompos | MDS1 and EVI1 complex locus, opposite strand                                 | 5.622376 | 5.090051 | 5.409518 | 5.780122 | 6.836652 | 5.495954 |
| 17421600 | Mtor     | mechanistic target of rapamycin (serine/threonine kinase)                    | 94.68868 | 110.46   | 99.79184 | 86.50071 | 99.76003 | 84.12193 |
| 17254895 | Mks1     | Meckel syndrome, type 1                                                      | 13.79917 | 14.51346 | 13.976   | 15.51305 | 13.50077 | 14.18398 |
| 17268755 | Med1     | mediator complex subunit 1                                                   | 51.71748 | 54.8637  | 52.98015 | 54.9619  | 50.83076 | 54.9981  |
| 17288414 | Med10    | mediator complex subunit 10                                                  | 18.12664 | 22.88817 | 21.93633 | 25.36118 | 26.80704 | 25.36118 |
| 17252032 | Med11    | mediator complex subunit 11                                                  | 24.87664 | 17.19027 | 25.584   | 20.69084 | 18.26715 | 19.23484 |
| 17536669 | Med12    | mediator complex subunit 12                                                  | 30.83293 | 32.80082 | 35.49318 | 29.47092 | 33.84662 | 33.84662 |
| 17397827 | Med12l   | mediator complex subunit 12-like                                             | 12.50315 | 16.70097 | 13.99297 | 12.39434 | 11.61695 | 12.54221 |
| 17267268 | Med13    | mediator complex subunit 13                                                  | 93.62033 | 132.2157 | 110.2275 | 113.0941 | 109.9779 | 111.4575 |
| 17441540 | Med13l   | mediator complex subunit 13-like                                             | 43.28724 | 41.27654 | 41.77593 | 34.76684 | 35.32236 | 40.06332 |
| 17540282 | Med14    | mediator complex subunit 14                                                  | 46.13245 | 38.87121 | 45.57277 | 44.66553 | 44.62778 | 40.67893 |
| 17328756 | Med15    | mediator complex subunit 15                                                  | 46.98082 | 44.46074 | 55.24607 | 41.64525 | 39.00643 | 40.09638 |
| 17242729 | Med16    | mediator complex subunit 16                                                  | 21.71169 | 25.47623 | 30.41498 | 22.20404 | 29.37038 | 19.37279 |
| 17524141 | Med17    | mediator complex subunit 17                                                  | 23.96056 | 22.05968 | 16.83206 | 20.33312 | 15.99911 | 16.56872 |
| 17430853 | Med18    | mediator complex subunit 18                                                  | 6.698416 | 9.364228 | 8.596265 | 8.85339  | 6.472576 | 9.284859 |
| 17372584 | Med19    | mediator complex subunit 19                                                  | 43.13658 | 47.3729  | 38.85801 | 46.73301 | 61.38907 | 45.99292 |
| 17338280 | Med20    | mediator complex subunit 20                                                  | 37.34984 | 42.1199  | 40.04166 | 39.97871 | 33.33625 | 35.72891 |
| 17464303 | Med21    | mediator complex subunit 21                                                  | 51.66123 | 65.07989 | 64.27029 | 56.64906 | 57.0953  | 49.52345 |
| 17383164 | Med22    | mediator complex subunit 22                                                  | 22.62789 | 24.5107  | 24.9966  | 23.54176 | 24.01444 | 23.27824 |
| 17232244 | Med23    | mediator complex subunit 23                                                  | 29.39278 | 27.742   | 24.78079 | 24.5636  | 22.00074 | 23.81189 |
| 17268849 | Med24    | mediator complex subunit 24                                                  | 37.60389 | 30.79683 | 31.49345 | 38.23097 | 29.31973 | 28.35183 |
| 17268882 | Med24    | mediator complex subunit 24                                                  | 8.057878 | 8.355928 | 6.992896 | 7.693126 | 5.972355 | 8.253408 |
| 17490432 | Med25    | mediator complex subunit 25                                                  | 45.58129 | 49.72536 | 58.53794 | 45.76047 | 52.52127 | 40.59978 |
| 17510572 | Med26    | mediator complex subunit 26                                                  | 19.18079 | 17.61289 | 18.49649 | 18.49649 | 18.49649 | 17.28466 |
| 17368834 | Med27    | mediator complex subunit 27                                                  | 10.69    | 9.431322 | 11.67321 | 10.8496  | 10.5732  | 9.328984 |
| 17437263 | Med28    | mediator complex subunit 28                                                  | 27.9309  | 23.30811 | 28.96061 | 25.36716 | 21.49024 | 25.77606 |
| 17488463 | Med29    | mediator complex subunit 29                                                  | 28.81983 | 38.42651 | 44.59531 | 37.21675 | 42.20553 | 34.23144 |
| 17311492 | Med30    | mediator complex subunit 30                                                  | 13.06876 | 10.24686 | 10.18095 | 11.75555 | 10.48228 | 10.89686 |
| 17265625 | Med31    | mediator complex subunit 31                                                  | 15.6578  | 17.03311 | 12.35189 | 12.35189 | 19.84481 | 13.39423 |
| 17301890 | Med4     | mediator complex subunit 4                                                   | 12.62105 | 10.86156 | 9.163635 | 11.37646 | 10.53216 | 14.85009 |
| 17282368 | Med6     | mediator complex subunit 6                                                   | 28.96021 | 23.61874 | 23.01065 | 22.72912 | 23.64855 | 24.57399 |
| 17248800 | Med7     | mediator complex subunit 7                                                   | 21.85589 | 18.83273 | 13.89535 | 15.79439 | 16.74653 | 15.58763 |
| 17417749 | Med8     | mediator complex subunit 8                                                   | 36.88724 | 37.07925 | 35.00551 | 44.04023 | 33.93519 | 47.06687 |
| 17250325 | Med9     | mediator complex subunit 9                                                   | 20.16065 | 25.99226 | 27.58783 | 25.16802 | 22.74173 | 22.11985 |
| 17263506 | Med9os   | mediator complex subunit 9, opposite strand                                  | 7.514567 | 8.118707 | 10.18292 | 8.451515 | 8.453859 | 8.517677 |
| 17347210 | Memo1    | mediator of cell motility 1                                                  | 53.76629 | 38.69432 | 28.66285 | 39.23556 | 36.27692 | 41.83997 |
| 17244559 | Gm18409  | mediator of cell motility 1 pseudogene                                       | 2.723421 | 3.456855 | 2.465653 | 2.663106 | 2.777467 | 2.839919 |
| 17337250 | Mdc1     | mediator of DNA damage checkpoint 1                                          | 22.11035 | 22.02561 | 23.6597  | 22.48732 | 26.21281 | 20.37813 |
| 17327580 | Mefv     | Mediterranean fever                                                          | 4.786364 | 5.157708 | 5.677477 | 4.31452  | 5.316549 | 4.523658 |
| 17477946 | Mamstr   | MEF2 activating motif and SAP domain containing transcriptional regulator    | 7.27335  | 7.872272 | 7.253966 | 7.667307 | 5.737491 | 7.172818 |
| 17235626 | Matk     | megakaryocyte-associated tyrosine kinase                                     | 8.389181 | 12.41541 | 10.12732 | 9.79829  | 8.351483 | 9.79829  |
| 17320225 | Mlc1     | megalencephalic leukoencephalopathy with subcortical cysts 1 homolog (human) | 4.510164 | 7.214903 | 6.662252 | 6.776874 | 4.804179 | 5.217252 |
| 17459857 | M1ap     | meiosis 1 associated protein                                                 | 4.046543 | 4.488583 | 4.435756 | 4.257628 | 4.1322   | 4.257628 |
| 17328335 | Marf1    | meiosis arrest female 1                                                      | 133.4143 | 142.6464 | 137.3935 | 132.5893 | 157.2984 | 151.7129 |
| 17313461 | Mei1     | meiosis defective 1                                                          | 5.120306 | 5.086806 | 5.321378 | 5.120306 | 5.76328  | 5.895115 |
| 17381215 | Meig1    | meiosis expressed gene 1                                                     | 4.764913 | 4.045141 | 4.20927  | 4.20752  | 3.487396 | 4.20927  |
| 17256979 | Meioc    | meiosis specific with coiled-coil domain                                     | 2.606728 | 2.936749 | 2.721138 | 2.610163 | 3.783995 | 3.267778 |
| 17334433 | Meiob    | meiosis specific with OB domains                                             | 6.263504 | 6.642379 | 7.069656 | 7.035681 | 13.50133 | 8.175234 |
| 17519155 | Mns1     | meiosis-specific nuclear structural protein 1                                | 9.614355 | 9.093842 | 9.614355 | 9.822566 | 9.614355 | 10.96193 |
| 17519875 | Mei4     | meiosis-specific, MEI4 homolog (S. cerevisiae)                               | 3.12516  | 3.045333 | 3.339703 | 3.373486 | 4.692315 | 3.366315 |
| 17249684 | Meikin   | meiotic kinetochore factor                                                   | 3.078441 | 2.520098 | 2.437783 | 2.533514 | 2.586354 | 2.977951 |
| 17406323 | Mnd1     | meiotic nuclear divisions 1 homolog (S. cerevisiae)                          | 6.171709 | 8.104314 | 6.287864 | 6.588682 | 5.531497 | 8.566762 |
| 17514760 | Mre11a   | meiotic recombination 11 homolog A (S. cerevisiae)                           | 22.46769 | 21.80278 | 19.81279 | 16.25983 | 13.44483 | 18.08084 |
| 17260815 | Meis1    | Meis homeobox 1                                                              | 12.53874 | 11.42332 | 13.91231 | 14.31296 | 11.50939 | 11.24366 |
| 17389608 | Meis2    | Meis homeobox 2                                                              | 23.64659 | 19.11694 | 24.24306 | 21.23305 | 14.01325 | 12.30694 |
| 17389635 | Meis2    | Meis homeobox 2                                                              | 7.91078  | 9.41421  | 10.28536 | 9.71053  | 8.718198 | 7.326733 |
| 17474078 | Meis3    | Meis homeobox 3                                                              | 8.162381 | 7.049935 | 6.109736 | 6.446294 | 9.172977 | 7.669806 |
| 17358591 | Mlna     | melan-A                                                                      | 5.215878 | 4.257894 | 5.215878 | 6.540224 | 4.88382  | 5.305027 |
| 17313254 | Mchr1    | melanin-concentrating hormone receptor 1                                     | 3.856842 | 3.73762  | 3.486936 | 4.226197 | 4.320325 | 3.784703 |
| 17506627 | Mc1r     | melanocortin 1 receptor                                                      | 4.521182 | 4.681043 | 4.316943 | 4.48454  | 4.732197 | 4.681043 |
| 17355264 | Mc2r     | melanocortin 2 receptor                                                      | 3.111349 | 3.516134 | 2.884417 | 2.907219 | 2.779547 | 2.606963 |
| 17326987 | Mrap     | melanocortin 2 receptor accessory protein                                    | 120.967  | 108.5917 | 111.1258 | 100.337  | 92.50632 | 83.57966 |
| 17520063 | Mrap2    | melanocortin 2 receptor accessory protein 2                                  | 3.695245 | 4.190754 | 3.721257 | 3.695245 | 2.849957 | 3.549436 |
| 1730089  | Mc3r     | melanocortin 3 receptor                                                      | 3.799369 | 4.036626 | 3.641468 | 3.687134 | 4.478576 | 3.074965 |
| 17355135 | Mc4r     | melanocortin 4 receptor                                                      | 3.790426 | 3.186229 | 3.140077 | 3.557663 | 3.485945 | 4.25061  |
| 17351587 | Mc5r     | melanocortin 5 receptor                                                      | 6.223905 | 7.044318 | 5.234312 | 8.971816 | 5.13737  | 5.154956 |
| 17315397 | Myg1     | melanocyte proliferating gene 1                                              | 24.22996 | 32.00577 | 33.2405  | 33.28984 | 30.46329 | 23.14486 |
| 17548705 | Mela     | melanoma antigen                                                             | 3.827945 | 3.360486 | 4.013581 | 4.24231  | 3.970608 | 3.729055 |

|          |             |                                                                              |          |          |          |          |          |          |
|----------|-------------|------------------------------------------------------------------------------|----------|----------|----------|----------|----------|----------|
| 17542213 | Magea10     | melanoma antigen family A, 10                                                | 3.126221 | 3.0496   | 2.921785 | 2.985681 | 3.614109 | 3.009325 |
| 17543014 | Mageb16     | melanoma antigen family B, 16                                                | 6.187343 | 6.914668 | 8.000499 | 6.650994 | 6.489647 | 6.992896 |
| 17545148 | Mageb16-ps1 | melanoma antigen family B, 16, pseudogene 1                                  | 4.235904 | 5.266155 | 3.703322 | 3.703322 | 3.8745   | 3.629674 |
| 17548816 | Mageb17-ps  | melanoma antigen family B, 17, pseudogene [Source:MGI Symbol;Acc:MGI:364313] | 4.699476 | 3.622586 | 4.021741 | 4.021518 | 3.558329 | 4.087079 |
| 17543141 | Mageb18     | melanoma antigen family B, 18                                                | 2.318578 | 2.509726 | 2.435014 | 2.930445 | 2.763813 | 2.496402 |
| 17545582 | Magea1      | melanoma antigen, family A, 1                                                | 2.952342 | 3.890161 | 2.867135 | 3.001243 | 4.067127 | 2.962592 |
| 17545567 | Magea2      | melanoma antigen, family A, 2                                                | 5.378709 | 2.859474 | 3.339703 | 3.19045  | 3.038375 | 4.373354 |
| 17545553 | Magea3      | melanoma antigen, family A, 3                                                | 2.431607 | 2.357308 | 2.88172  | 3.321972 | 3.08378  | 2.627426 |
| 17535416 | Magea4      | melanoma antigen, family A, 4                                                | 3.550076 | 3.020694 | 3.008282 | 2.791363 | 2.443383 | 3.293862 |
| 17545574 | Magea5      | melanoma antigen, family A, 5                                                | 2.331082 | 2.278351 | 2.335902 | 2.917656 | 2.725668 | 2.779066 |
| 17545548 | Magea6      | melanoma antigen, family A, 6                                                | 2.245287 | 2.181    | 2.083357 | 2.083357 | 2.120126 | 2.045509 |
| 17545560 | Magea8      | melanoma antigen, family A, 8                                                | 2.572248 | 2.245863 | 2.745064 | 2.202253 | 2.615705 | 2.163774 |
| 17543139 | Mageb1      | melanoma antigen, family B, 1                                                | 2.204712 | 2.071061 | 2.075271 | 2.113274 | 2.459628 | 2.339483 |
| 17536218 | Mageb2      | melanoma antigen, family B, 2                                                | 1.777439 | 1.898013 | 1.87954  | 2.083357 | 1.969665 | 2.285991 |
| 17390670 | Mageb3      | melanoma antigen, family B, 3                                                | 2.724384 | 2.220785 | 1.943612 | 2.856859 | 2.09246  | 2.131797 |
| 17543069 | Mageb4      | melanoma antigen, family B, 4                                                | 3.171598 | 3.723553 | 3.857992 | 4.052073 | 3.435357 | 3.988621 |
| 17543082 | Gm41        | melanoma antigen, family B, 4 pseudogene                                     | 3.893803 | 3.824073 | 3.729055 | 3.729055 | 4.231502 | 3.729055 |
| 17543131 | Mageb5      | melanoma antigen, family B, 5                                                | 2.474762 | 1.709981 | 2.514096 | 2.464799 | 2.413171 | 2.219862 |
| 17543264 | Maged1      | melanoma antigen, family D, 1                                                | 161.3612 | 171.3616 | 172.1163 | 130.8591 | 120.6814 | 127.7607 |
| 17545353 | Maged2      | melanoma antigen, family D, 2                                                | 18.43186 | 27.62782 | 17.33469 | 23.51941 | 16.85822 | 21.24763 |
| 17537029 | Magee1      | melanoma antigen, family E, 1                                                | 5.347038 | 5.536676 | 4.886969 | 5.10008  | 4.418663 | 4.502793 |
| 17543885 | Magee2      | melanoma antigen, family E, 2                                                | 3.474704 | 3.428506 | 3.516816 | 3.422807 | 3.933736 | 3.468423 |
| 17545482 | Mageh1      | melanoma antigen, family H, 1                                                | 7.565    | 8.10027  | 8.162211 | 8.733924 | 9.157476 | 7.680286 |
| 17478793 | MageL2      | melanoma antigen, family L, 2                                                | 4.775494 | 5.102662 | 5.624169 | 5.183764 | 5.108359 | 6.092862 |
| 17253249 | Mum1        | melanoma associated antigen (mutated) 1                                      | 7.017027 | 9.001716 | 7.065933 | 5.536829 | 7.190639 | 9.906051 |
| 17538060 | Mum111      | melanoma associated antigen (mutated) 1-like 1                               | 3.736636 | 4.076384 | 3.736636 | 3.35718  | 3.736636 | 4.376386 |
| 17516518 | Mcam        | melanoma cell adhesion molecule                                              | 21.67695 | 21.67695 | 29.10712 | 18.63457 | 21.67695 | 18.48201 |
| 17488151 | Mia         | melanoma inhibitory activity                                                 | 3.509925 | 3.261555 | 3.872781 | 3.803005 | 4.673068 | 3.942635 |
| 17275718 | Mia2        | melanoma inhibitory activity 2                                               | 262.9965 | 265.3826 | 254.7362 | 266.5976 | 255.2788 | 275.4506 |
| 17230668 | Mia3        | melanoma inhibitory activity 3                                               | 187.4056 | 182.3745 | 159.4411 | 142.3778 | 187.5459 | 167.4376 |
| 17215629 | MIph        | melanophilin                                                                 | 6.420875 | 8.589535 | 7.949532 | 7.679328 | 7.972819 | 5.988937 |
| 17224125 | Mreg        | melanoregulin                                                                | 86.22952 | 79.48771 | 65.27687 | 79.33744 | 66.75111 | 81.15061 |
| 17500867 | Mtnr1a      | melatonin receptor 1A                                                        | 24.82772 | 20.04041 | 18.97753 | 18.97753 | 20.84876 | 17.70531 |
| 17524228 | Mtnr1b      | melatonin receptor 1B                                                        | 6.992896 | 6.037662 | 4.601199 | 6.059883 | 5.506784 | 6.193608 |
| 17469183 | Magi1       | membrane associated guanylate kinase, WW and PDZ domain containing 1         | 30.1175  | 34.02823 | 29.03095 | 26.50954 | 27.31251 | 22.67782 |
| 17435008 | Magi2       | membrane associated guanylate kinase, WW and PDZ domain containing 2         | 8.170645 | 7.595421 | 7.357879 | 7.834331 | 7.273602 | 8.290103 |
| 17408698 | Magi3       | membrane associated guanylate kinase, WW and PDZ domain containing 3         | 76.2513  | 75.37112 | 61.94732 | 64.73975 | 78.43252 | 63.0944  |
| 17286254 | Mboat1      | membrane bound O-acyltransferase domain containing 1                         | 3.906157 | 3.836817 | 3.386488 | 3.691712 | 3.245836 | 2.515787 |
| 17274558 | Mboat2      | membrane bound O-acyltransferase domain containing 2                         | 3.455441 | 3.610078 | 2.796573 | 3.585141 | 3.005052 | 4.478483 |
| 17500517 | Mboat4      | membrane bound O-acyltransferase domain containing 4                         | 5.195887 | 6.614261 | 5.687363 | 6.614261 | 6.742249 | 6.576591 |
| 17485574 | Mboat7      | membrane bound O-acyltransferase domain containing 7                         | 35.55573 | 33.47982 | 40.9213  | 32.28965 | 32.82652 | 31.71251 |
| 17541846 | Mmgt1       | membrane magnesium transporter 1                                             | 43.34068 | 41.81417 | 37.31982 | 40.27772 | 46.78389 | 35.85544 |
| 17250755 | Mmgt2       | membrane magnesium transporter 2                                             | 8.958704 | 6.196571 | 6.543489 | 6.943774 | 6.76819  | 6.286339 |
| 17397990 | Mme         | membrane metallo endopeptidase                                               | 120.9042 | 117.405  | 111.0927 | 137.882  | 80.41373 | 118.17   |
| 17422415 | Mmel1       | membrane metallo-endopeptidase-like 1                                        | 5.208074 | 5.364709 | 4.744579 | 5.340297 | 5.146851 | 4.846489 |
| 17542751 | Mpp1        | membrane protein, palmitoylated                                              | 87.30667 | 98.68918 | 107.1873 | 86.01283 | 87.0752  | 77.3377  |
| 17270028 | Mpp2        | membrane protein, palmitoylated 2 (MAGUK p55 subfamily member 2)             | 9.175393 | 8.850384 | 8.850384 | 7.626441 | 8.89676  | 8.850384 |
| 17269995 | Mpp3        | membrane protein, palmitoylated 3 (MAGUK p55 subfamily member 3)             | 8.561657 | 8.542806 | 6.777955 | 10.42431 | 8.749072 | 9.597176 |
| 17223509 | Mpp4        | membrane protein, palmitoylated 4 (MAGUK p55 subfamily member 4)             | 7.529218 | 7.930985 | 4.186748 | 7.229571 | 6.171709 | 5.937642 |
| 17276714 | Mpp5        | membrane protein, palmitoylated 5 (MAGUK p55 subfamily member 5)             | 34.98028 | 34.76395 | 26.48695 | 43.38577 | 29.01265 | 34.29366 |
| 17458520 | Mpp6        | membrane protein, palmitoylated 6 (MAGUK p55 subfamily member 6)             | 184.604  | 141.0849 | 118.2692 | 154.6175 | 151.2845 | 163.438  |
| 17352549 | Mpp7        | membrane protein, palmitoylated 7 (MAGUK p55 subfamily member 7)             | 23.97618 | 21.1032  | 16.76732 | 20.46831 | 17.16526 | 19.85775 |
| 17501520 | March1      | membrane-associated ring finger (C3HC4) 1                                    | 7.885324 | 7.423811 | 8.964046 | 7.584373 | 7.312172 | 7.753082 |
| 17270684 | March10     | membrane-associated ring finger (C3HC4) 10                                   | 6.494147 | 6.386387 | 6.494147 | 7.068774 | 6.564841 | 6.184084 |
| 17310661 | March11     | membrane-associated ring finger (C3HC4) 11                                   | 2.948416 | 3.730839 | 3.137401 | 4.043543 | 3.821033 | 3.518328 |
| 17343602 | March2      | membrane-associated ring finger (C3HC4) 2                                    | 50.98532 | 58.64068 | 50.72306 | 53.0496  | 51.38873 | 53.20427 |
| 17354463 | March3      | membrane-associated ring finger (C3HC4) 3                                    | 6.292049 | 6.992896 | 6.992896 | 7.977021 | 6.992896 | 5.782567 |
| 17224146 | March4      | membrane-associated ring finger (C3HC4) 4                                    | 5.149349 | 3.807885 | 4.247959 | 3.923959 | 5.292869 | 5.111051 |
| 17359008 | March5      | membrane-associated ring finger (C3HC4) 5                                    | 193.066  | 194.3819 | 184.5477 | 179.1544 | 186.9307 | 193.066  |
| 17316298 | March6      | membrane-associated ring finger (C3HC4) 6                                    | 199.855  | 230.9473 | 232.3877 | 227.7204 | 257.1364 | 239.4748 |
| 17371059 | March7      | membrane-associated ring finger (C3HC4) 7                                    | 27.2099  | 40.06971 | 31.92158 | 35.82016 | 42.11172 | 30.20991 |
| 17462113 | March8      | membrane-associated ring finger (C3HC4) 8                                    | 103.2831 | 86.01402 | 96.159   | 97.52296 | 92.38905 | 88.14825 |
| 17245692 | March9      | membrane-associated ring finger (C3HC4) 9                                    | 3.113376 | 4.20927  | 4.667565 | 4.886529 | 4.20927  | 5.840371 |
| 17513417 | Mbtps1      | membrane-bound transcription factor peptidase, site 1                        | 63.92995 | 50.58788 | 60.48309 | 56.92301 | 46.77254 | 46.61137 |
| 17545675 | Mbtps2      | membrane-bound transcription factor peptidase, site 2                        | 19.7789  | 19.61397 | 24.24054 | 18.92984 | 19.55465 | 23.78351 |
| 17362922 | Ms4a1       | membrane-spanning 4-domains, subfamily A, member 1                           | 3.907484 | 3.77836  | 3.787485 | 3.449913 | 4.661519 | 3.787485 |
| 17362839 | Ms4a10      | membrane-spanning 4-domains, subfamily A, member 10                          | 4.964471 | 4.938524 | 4.796892 | 4.750667 | 4.410249 | 5.265425 |
| 17362915 | Ms4a12      | membrane-spanning 4-domains, subfamily A, member 12                          | 2.98477  | 2.589691 | 2.348501 | 3.169884 | 3.396573 | 2.654242 |
| 17362904 | Ms4a13      | membrane-spanning 4-domains, subfamily A, member 13                          | 6.082313 | 5.672835 | 5.29709  | 5.36233  | 5.460829 | 5.288579 |
| 17362941 | Ms4a14      | membrane-spanning 4-domains, subfamily A, member 14                          | 2.479604 | 2.778565 | 2.803852 | 2.634465 | 2.716935 | 3.033577 |
| 17362849 | Ms4a15      | membrane-spanning 4-domains, subfamily A, member 15                          | 7.626547 | 7.775902 | 7.338423 | 7.476588 | 5.742663 | 6.889782 |
| 17362861 | Ms4a18      | membrane-spanning 4-domains, subfamily A, member 18                          | 2.199522 | 2.67402  | 2.625842 | 2.682708 | 2.435925 | 3.125788 |
| 17362986 | Ms4a2       | membrane-spanning 4-domains, subfamily A, member 2                           | 3.395796 | 3.738035 | 3.604602 | 3.845683 | 3.288159 | 4.058284 |
| 17362998 | Ms4a3       | membrane-spanning 4-domains, subfamily A, member 3                           | 7.274459 | 8.166795 | 7.230974 | 8.073868 | 6.219118 | 8.15452  |
| 17357640 | Ms4a4a      | membrane-spanning 4-domains, subfamily A, member 4A                          | 3.665297 | 4.376993 | 3.775349 | 5.465411 | 4.320865 | 4.095643 |
| 17357659 | Ms4a4b      | membrane-spanning 4-domains, subfamily A, member 4B                          | 3.959477 | 2.746263 | 2.712908 | 2.3594   | 4.0319   | 2.667762 |
| 17357648 | Ms4a4c      | membrane-spanning 4-domains, subfamily A, member 4C                          | 9.029462 | 7.620048 | 9.399344 | 11.38293 | 4.783942 | 9.222705 |
| 17357700 | Ms4a4d      | membrane-spanning 4-domains, subfamily A, member 4D                          | 17.97637 | 17.94127 | 16.06791 | 17.58435 | 16.18505 | 14.37958 |
| 17362934 | Ms4a5       | membrane-spanning 4-domains, subfamily A, member 5                           | 3.788981 | 3.542162 | 3.248041 | 3.123904 | 3.808139 | 3.339703 |
| 17357688 | Ms4a6b      | membrane-spanning 4-domains, subfamily A, member 6B                          | 7.96056  | 7.423708 | 7.974754 | 9.34957  | 8.090843 | 8.062851 |
| 17357671 | Ms4a6c      | membrane-spanning 4-domains, subfamily A, member 6C                          | 6.992896 | 8.071686 | 6.302525 | 7.166308 | 6.26637  | 7.344173 |
| 17362973 | Ms4a6d      | membrane-spanning 4-domains, subfamily A, member 6D                          | 6.591103 | 5.979687 | 5.27474  | 4.035199 | 3.729055 | 4.701887 |
| 17362953 | Ms4a7       | membrane-spanning 4-domains, subfamily A, member 7                           | 5.319018 | 5.506173 | 7.068382 | 4.971117 | 6.190775 | 5.506173 |
| 17362874 | Ms4a8a      | membrane-spanning 4-domains, subfamily A, member 8A                          | 7.480424 | 8.591738 | 11.50812 | 7.108327 | 8.401867 | 7.761901 |

|          |         |                                                                              |          |          |          |          |          |          |
|----------|---------|------------------------------------------------------------------------------|----------|----------|----------|----------|----------|----------|
| 17276262 | Mnat1   | menage a trois 1                                                             | 28.29451 | 25.62251 | 27.752   | 26.36752 | 31.86388 | 31.64181 |
| 17440633 | Mn1     | meningioma 1                                                                 | 7.154892 | 9.171451 | 7.217154 | 10.27923 | 8.299992 | 9.326657 |
| 17365250 | Mgea5   | meningioma expressed antigen 5 (hyaluronidase)                               | 118.3323 | 127.0956 | 132.3441 | 134.579  | 137.2593 | 154.3413 |
| 17345066 | Mep1a   | meprin 1 alpha                                                               | 3.200195 | 4.472557 | 4.26584  | 4.012635 | 4.118446 | 4.325509 |
| 17348860 | Mep1b   | meprin 1 beta                                                                | 4.211225 | 3.54447  | 3.835753 | 3.809337 | 3.454771 | 4.284628 |
| 17312738 | Mpst    | mercaptopyruvate sulfurtransferase                                           | 42.89448 | 44.32043 | 46.84652 | 52.65469 | 49.8192  | 49.4497  |
| 17530782 | Manf    | mesencephalic astrocyte-derived neurotrophic factor                          | 50.17789 | 21.44218 | 21.049   | 20.60853 | 24.66169 | 17.87684 |
| 17269974 | Meox1   | mesenchyme homeobox 1                                                        | 5.725573 | 3.962827 | 5.974508 | 5.103475 | 3.723037 | 5.629591 |
| 17275062 | Meox2   | mesenchyme homeobox 2                                                        | 2.884957 | 3.339703 | 4.45696  | 3.339703 | 3.372527 | 3.64609  |
| 17444970 | Medag   | mesenteric estrogen dependent adipogenesis                                   | 3.072941 | 3.910546 | 3.820178 | 4.272084 | 4.598712 | 3.130038 |
| 17492943 | Mesdc1  | mesoderm development candidate 1                                             | 9.178828 | 9.310251 | 9.310251 | 9.125098 | 9.898775 | 10.33796 |
| 17479899 | Mesdc2  | mesoderm development candidate 2                                             | 80.67501 | 50.40448 | 58.58218 | 57.21891 | 65.3561  | 65.32304 |
| 17416110 | Mier1   | mesoderm induction early response 1 homolog (Xenopus laevis)                 | 28.87642 | 32.09596 | 29.66295 | 31.04136 | 29.57959 | 30.56122 |
| 17242589 | Mier2   | mesoderm induction early response 1, family member 2                         | 18.04641 | 17.43483 | 19.74807 | 16.48224 | 18.04641 | 13.5195  |
| 17289824 | Mier3   | mesoderm induction early response 1, family member 3                         | 43.41916 | 41.4141  | 37.10136 | 38.99589 | 39.25379 | 38.99589 |
| 17492425 | Mesp1   | mesoderm posterior 1                                                         | 4.68338  | 5.338447 | 4.799719 | 6.50523  | 5.120306 | 5.120306 |
| 17479474 | Mesp2   | mesoderm posterior 2                                                         | 8.889055 | 11.28606 | 9.044809 | 9.750931 | 9.946094 | 10.21948 |
| 17456934 | Mest    | mesoderm specific transcript                                                 | 23.64151 | 23.77939 | 27.50382 | 17.93294 | 17.06253 | 18.26741 |
| 17279957 | Msgn1   | mesogenin 1                                                                  | 6.015522 | 5.908861 | 6.588956 | 6.834094 | 6.44549  | 5.56106  |
| 17342340 | Msln    | mesothelin                                                                   | 5.19495  | 5.757051 | 6.036239 | 4.925158 | 4.083907 | 6.072329 |
| 17334730 | Mslnl   | mesothelin-like                                                              | 7.304016 | 8.893739 | 6.451837 | 6.588363 | 6.996726 | 7.135329 |
| 17456176 | Met     | met proto-oncogene                                                           | 170.8587 | 154.414  | 174.8362 | 174.8519 | 188.6607 | 162.3395 |
| 17310893 | Mtdh    | metadherin                                                                   | 137.8409 | 126.5777 | 133.2776 | 131.2406 | 120.5744 | 127.3822 |
| 17418339 | Mtf1    | metal response element binding transcription factor 1                        | 33.82059 | 36.09182 | 33.4156  | 33.4156  | 29.16103 | 29.87362 |
| 17440136 | Mtf2    | metal response element binding transcription factor 2                        | 10.52749 | 10.15839 | 9.327756 | 8.506113 | 9.656966 | 12.10365 |
| 17443797 | Mblac1  | metallo-beta-lactamase domain containing 1                                   | 8.263655 | 10.22664 | 7.116658 | 7.65918  | 10.71537 | 10.1434  |
| 17288903 | Mblac2  | metallo-beta-lactamase domain containing 2                                   | 31.05384 | 21.79462 | 23.38319 | 23.73312 | 25.36118 | 32.93592 |
| 17355145 | Mppe1   | metallophosphoesterase 1                                                     | 15.60774 | 17.3514  | 17.11121 | 16.89764 | 16.87435 | 19.08583 |
| 17313661 | Mpped1  | metallophosphoesterase domain containing 1                                   | 4.574265 | 6.030928 | 5.018618 | 6.710871 | 6.030928 | 9.943819 |
| 17374028 | Mpped2  | metallophosphoesterase domain containing 2                                   | 5.101671 | 6.176074 | 5.765757 | 5.612019 | 5.604633 | 5.048833 |
| 17503942 | Mt1     | metallothionein 1                                                            | 51.21448 | 321.7843 | 536.8592 | 176.4995 | 450.9551 | 442.3425 |
| 17503937 | Mt2     | metallothionein 2                                                            | 64.7411  | 1220.139 | 1796.583 | 619.1821 | 1647.257 | 1654.753 |
| 17503932 | Mt3     | metallothionein 3                                                            | 6.078435 | 5.742584 | 7.292078 | 6.5843   | 5.835717 | 6.088176 |
| 17503926 | Mt4     | metallothionein 4                                                            | 5.063272 | 5.443596 | 7.06368  | 6.251793 | 3.729055 | 5.036355 |
| 17355935 | Mt15    | metallothionein-like 5, testis-specific (tesmin)                             | 6.778378 | 8.450929 | 6.778378 | 4.87023  | 6.61174  | 6.660175 |
| 17279471 | Mta1    | metastasis associated 1                                                      | 88.12748 | 90.82767 | 107.336  | 78.63556 | 81.8046  | 86.91902 |
| 17340017 | Mta3    | metastasis associated 3                                                      | 70.65844 | 78.29129 | 80.43882 | 68.64535 | 50.64542 | 62.14429 |
| 17477785 | Mtag2   | metastasis associated gene 2                                                 | 2.937726 | 3.705094 | 3.197269 | 2.851399 | 3.356622 | 3.294022 |
| 17279724 | Macc1   | metastasis associated in colon cancer 1                                      | 2.910829 | 3.136944 | 2.996545 | 3.021322 | 3.362863 | 2.750245 |
| 17361798 | Malat1  | metastasis associated lung adenocarcinoma transcript 1 (non-coding RNA)      | 752.4438 | 1097.671 | 1192.811 | 1139.851 | 1261.942 | 1261.155 |
| 17317327 | Mtss1   | metastasis suppressor 1                                                      | 192.7704 | 211.4906 | 235.3836 | 203.1498 | 336.152  | 255.0648 |
| 17505623 | Mtss1l  | metastasis suppressor 1-like                                                 | 16.17294 | 16.36918 | 17.70739 | 15.2458  | 14.31296 | 15.31125 |
| 17357338 | Mta2    | metastasis-associated gene family, member 2                                  | 88.9708  | 88.9967  | 85.00819 | 89.50523 | 86.47792 | 88.89066 |
| 17406941 | Mtx1    | metaxin 1                                                                    | 30.27909 | 39.18827 | 27.92393 | 28.51047 | 30.72583 | 35.67422 |
| 17372119 | Mtx2    | metaxin 2                                                                    | 120.6062 | 108.2295 | 113.8436 | 120.0857 | 105.162  | 109.4463 |
| 17289118 | Mtx3    | metaxin 3                                                                    | 20.34581 | 20.41701 | 14.99812 | 18.49367 | 17.93319 | 28.80166 |
| 17342386 | Metrn   | meteorin, glial cell differentiation regulator                               | 9.925089 | 9.454558 | 11.50086 | 13.07193 | 11.50086 | 12.47346 |
| 17259679 | Metrl   | meteorin, glial cell differentiation regulator-like                          | 12.13565 | 11.73894 | 11.79285 | 11.77659 | 11.92403 | 11.98294 |
| 17513560 | Mthfsd  | methenyltetrahydrofolate synthetase domain containing                        | 28.37582 | 33.45129 | 29.67446 | 32.96264 | 24.34443 | 28.52174 |
| 17298956 | Mat1a   | methionine adenosyltransferase I, alpha                                      | 2497.311 | 3189.556 | 3431.039 | 3296.204 | 3146.364 | 3125.736 |
| 17467753 | Mat2a   | methionine adenosyltransferase II, alpha                                     | 141.0859 | 174.4041 | 195.8982 | 158.4342 | 160.4278 | 178.7736 |
| 17261825 | Mat2b   | methionine adenosyltransferase II, beta                                      | 41.53628 | 43.69875 | 44.88246 | 47.8186  | 53.85842 | 53.32093 |
| 17244378 | Metap2  | methionine aminopeptidase 2                                                  | 154.0933 | 160.8252 | 149.5444 | 145.8316 | 156.7857 | 161.3064 |
| 17307695 | Msra    | methionine sulfoxide reductase A                                             | 199.1346 | 208.9813 | 209.8042 | 201.5676 | 190.7461 | 193.9996 |
| 17334419 | Msrb1   | methionine sulfoxide reductase B1                                            | 442.4958 | 431.2139 | 381.6801 | 419.2073 | 416.1933 | 393.6283 |
| 17367367 | Msrb2   | methionine sulfoxide reductase B2                                            | 34.25494 | 28.23573 | 29.43519 | 34.07472 | 34.22432 | 34.92141 |
| 17245433 | Msrb3   | methionine sulfoxide reductase B3                                            | 38.79046 | 38.40867 | 40.1495  | 34.53004 | 29.40949 | 30.66434 |
| 17245850 | Mars    | methionine-tRNA synthetase                                                   | 111.688  | 89.43577 | 82.49473 | 93.38313 | 88.58865 | 76.01436 |
| 17212904 | Mars2   | methionine-tRNA synthetase 2 (mitochondrial)                                 | 7.385881 | 6.192277 | 5.776598 | 9.714973 | 7.214303 | 8.183341 |
| 17410680 | Metap1  | methionyl aminopeptidase 1                                                   | 90.25031 | 83.62776 | 87.48538 | 90.16027 | 84.2468  | 71.06563 |
| 17371756 | Metap1d | methionyl aminopeptidase type 1D (mitochondrial)                             | 13.83605 | 20.84949 | 19.35186 | 21.80066 | 22.80677 | 21.74708 |
| 17371775 | Metap1d | methionyl aminopeptidase type 1D (mitochondrial)                             | 3.542505 | 2.838463 | 4.84864  | 5.661758 | 3.923986 | 4.79297  |
| 17542573 | Mecp2   | methyl CpG binding protein 2                                                 | 19.7158  | 28.00087 | 26.69726 | 29.25842 | 23.62594 | 30.21494 |
| 17351726 | Mbd1    | methyl-CpG binding domain protein 1                                          | 87.05046 | 104.2086 | 40.85016 | 67.02001 | 62.41323 | 58.7086  |
| 17351668 | Mbd2    | methyl-CpG binding domain protein 2                                          | 93.85424 | 88.50763 | 85.09485 | 100.7461 | 96.55439 | 88.44324 |
| 17242910 | Mbd3    | methyl-CpG binding domain protein 3                                          | 32.15096 | 31.2887  | 36.00861 | 30.54999 | 33.23865 | 34.76419 |
| 17514899 | Mbd3l1  | methyl-CpG binding domain protein 3-like 1                                   | 2.642072 | 2.377376 | 2.045509 | 2.561591 | 2.466474 | 2.18965  |
| 17514892 | Mbd3l2  | methyl-CpG binding domain protein 3-like 2                                   | 2.954246 | 2.857335 | 3.153776 | 3.059212 | 2.954246 | 3.120982 |
| 17469952 | Mbd4    | methyl-CpG binding domain protein 4                                          | 5.48933  | 5.000977 | 6.557746 | 4.99135  | 4.437447 | 7.19039  |
| 17370612 | Mbd5    | methyl-CpG binding domain protein 5                                          | 20.05556 | 20.49486 | 21.76774 | 19.90005 | 17.75939 | 18.62954 |
| 17245831 | Mbd6    | methyl-CpG binding domain protein 6                                          | 28.91067 | 36.65352 | 41.13002 | 36.84891 | 44.1368  | 39.69458 |
| 17245847 | Mbd6    | methyl-CpG binding domain protein 6                                          | 7.115376 | 7.848136 | 7.164818 | 6.537822 | 9.916837 | 6.535058 |
| 17404750 | Mccc1   | methylcrotonoyl-Coenzyme A carboxylase 1 (alpha)                             | 97.7368  | 81.36859 | 75.01775 | 86.5103  | 82.98105 | 93.32101 |
| 17396933 | Mccc1os | methylcrotonoyl-Coenzyme A carboxylase 1 (alpha), opposite strand            | 3.840995 | 4.290215 | 4.659839 | 4.57639  | 3.840995 | 3.890997 |
| 17295503 | Mccc2   | methylcrotonoyl-Coenzyme A carboxylase 2 (beta)                              | 101.5467 | 102.925  | 106.3916 | 112.2841 | 101.8767 | 101.2368 |
| 17468143 | Mthfd2  | methylenetetrahydrofolate dehydrogenase (NAD+ dependent), methenyltetrahyd   | 10.22969 | 8.730958 | 8.114094 | 7.690194 | 8.213061 | 6.329713 |
| 17231387 | Mthfd1l | methylenetetrahydrofolate dehydrogenase (NADP+ dependent) 1-like             | 10.8566  | 13.94349 | 16.43444 | 9.960306 | 12.60776 | 9.310251 |
| 17439003 | Mthfd2l | methylenetetrahydrofolate dehydrogenase (NADP+ dependent) 2-like             | 8.405828 | 8.077506 | 6.491402 | 9.209099 | 8.688337 | 7.906833 |
| 17276520 | Mthfd1  | methylenetetrahydrofolate dehydrogenase (NADP+ dependent), methenyltetrahyd  | 257.436  | 276.246  | 278.8103 | 263.9407 | 256.7553 | 314.3526 |
| 17385030 | Mmadhc  | methylmalonic aciduria (cobalamin deficiency) cblD type, with homocystinuria | 93.09682 | 75.7876  | 84.32801 | 80.34687 | 68.58257 | 77.29161 |
| 17510726 | Mmaa    | methylmalonic aciduria (cobalamin deficiency) type A                         | 30.8278  | 30.8278  | 32.61446 | 36.06131 | 23.1447  | 38.12459 |
| 17451536 | Mmaab   | methylmalonic aciduria (cobalamin deficiency) type B homolog (human)         | 38.80122 | 41.81649 | 42.15758 | 42.87278 | 37.3861  | 45.90438 |
| 17428702 | Mmachc  | methylmalonic aciduria cblC type, with homocystinuria                        | 21.04798 | 21.84604 | 21.29791 | 22.84521 | 22.93311 | 22.29286 |
| 17478883 | Mcee    | methylmalonyl CoA epimerase                                                  | 79.94689 | 102.2339 | 100.3704 | 89.22277 | 93.66772 | 118.6633 |

|          |          |                                                                               |          |          |          |          |          |          |
|----------|----------|-------------------------------------------------------------------------------|----------|----------|----------|----------|----------|----------|
| 17337719 | Mut      | methylmalonyl-Coenzyme A mutase                                               | 256.4742 | 246.6138 | 237.3611 | 281.0553 | 269.9952 | 320.5199 |
| 17454157 | Mepce    | methylphosphate capping enzyme                                                | 20.34779 | 26.73004 | 24.01394 | 23.56772 | 24.24878 | 20.12142 |
| 17509629 | Msmo1    | methylsterol monooxygenase 1                                                  | 81.9107  | 57.76966 | 80.27618 | 60.2279  | 94.27086 | 54.70497 |
| 17415380 | Mtap     | methylthioadenosine phosphorylase                                             | 64.3416  | 58.76845 | 54.42019 | 61.97481 | 49.25642 | 48.95078 |
| 17511102 | Mri1     | methylthioribose-1-phosphate isomerase homolog (S. cerevisiae)                | 18.21759 | 27.62782 | 20.78758 | 23.29454 | 27.01015 | 24.36114 |
| 17237876 | Mettl1   | methyltransferase like 1                                                      | 23.38319 | 17.72373 | 19.67975 | 20.63727 | 22.28946 | 12.71985 |
| 17497131 | Mettl10  | methyltransferase like 10                                                     | 8.49533  | 11.02373 | 11.98385 | 11.1694  | 11.98419 | 14.74925 |
| 17229121 | Mettl11b | methyltransferase like 11B                                                    | 3.246488 | 3.487492 | 3.769466 | 3.663849 | 3.483651 | 3.711983 |
| 17228943 | Mettl13  | methyltransferase like 13                                                     | 13.09306 | 15.12685 | 12.75075 | 11.38987 | 10.71782 | 10.84757 |
| 17410043 | Mettl14  | methyltransferase like 14                                                     | 22.02347 | 20.14877 | 19.61982 | 22.02347 | 19.30537 | 21.94773 |
| 17389121 | Mettl15  | methyltransferase like 15                                                     | 9.332024 | 10.48228 | 11.31222 | 10.54012 | 9.91505  | 10.33854 |
| 17252800 | Mettl16  | methyltransferase like 16                                                     | 34.58753 | 26.52829 | 31.27721 | 29.20756 | 31.08917 | 27.3233  |
| 17299644 | Mettl17  | methyltransferase like 17                                                     | 24.43589 | 24.65007 | 23.15048 | 27.86496 | 22.54257 | 25.09434 |
| 17218813 | Mettl18  | methyltransferase like 18                                                     | 8.26102  | 6.138346 | 6.071067 | 7.256531 | 5.908984 | 8.132055 |
| 17257310 | Mettl2   | methyltransferase like 2                                                      | 20.88912 | 20.33919 | 18.06882 | 21.02538 | 26.2288  | 19.24618 |
| 17464492 | Mettl20  | methyltransferase like 20                                                     | 45.01457 | 59.76546 | 52.43216 | 49.0503  | 56.62275 | 32.90238 |
| 17223777 | Mettl21a | methyltransferase like 21A                                                    | 25.68261 | 26.79236 | 23.79407 | 27.80784 | 31.30237 | 27.53606 |
| 17245686 | Mettl21b | methyltransferase like 21B                                                    | 6.295452 | 4.95354  | 4.647678 | 5.279276 | 5.019209 | 4.95354  |
| 17222668 | Mettl21c | methyltransferase like 21C                                                    | 2.332763 | 2.50198  | 2.793706 | 2.625842 | 3.044784 | 2.641248 |
| 17222707 | Mettl21e | methyltransferase like 21E                                                    | 2.563367 | 2.8002   | 2.67402  | 3.012205 | 2.67402  | 2.67402  |
| 17322735 | Mettl22  | methyltransferase like 22                                                     | 22.57619 | 21.76231 | 26.56104 | 23.59959 | 23.95475 | 19.19475 |
| 17258653 | Mettl23  | methyltransferase like 23                                                     | 25.60032 | 24.53875 | 26.19428 | 27.6884  | 25.90054 | 25.33114 |
| 17232778 | Mettl24  | methyltransferase like 24                                                     | 9.904197 | 10.56375 | 10.20271 | 9.800192 | 11.56746 | 8.449582 |
| 17244679 | Mettl25  | methyltransferase like 25                                                     | 6.171709 | 5.284291 | 5.471438 | 5.696319 | 5.260354 | 6.602581 |
| 17306289 | Mettl3   | methyltransferase like 3                                                      | 27.97488 | 26.33245 | 27.49448 | 37.80093 | 30.58029 | 34.2063  |
| 17348054 | Mettl4   | methyltransferase like 4                                                      | 30.15113 | 28.94275 | 28.14701 | 30.5716  | 33.9679  | 31.19321 |
| 17386328 | Mettl5   | methyltransferase like 5                                                      | 39.18501 | 36.47459 | 37.02788 | 37.07308 | 40.00033 | 39.21517 |
| 17371520 | Mettl5os | methyltransferase like 5, opposite strand [Source:MGI Symbol;Acc:MGI:1922537] | 5.068609 | 5.145709 | 5.300432 | 5.896137 | 5.300432 | 6.055097 |
| 17304757 | Mettl6   | methyltransferase like 6                                                      | 31.81863 | 32.53363 | 29.40216 | 36.06581 | 31.16274 | 33.71994 |
| 17315002 | Mettl7a1 | methyltransferase like 7A1                                                    | 374.6501 | 373.3617 | 357.5249 | 367.7624 | 375.1594 | 402.2866 |
| 17315007 | Mettl7a3 | methyltransferase like 7A3                                                    | 110.2924 | 89.23205 | 110.6324 | 150.6879 | 87.28912 | 131.8743 |
| 17246381 | Mettl7b  | methyltransferase like 7B                                                     | 606.5236 | 702.1084 | 683.8708 | 649.7361 | 616.0271 | 719.4148 |
| 17386377 | Mettl8   | methyltransferase like 8                                                      | 15.96444 | 13.7856  | 18.10128 | 19.87386 | 13.50246 | 16.43523 |
| 17482626 | Mettl9   | methyltransferase like 9                                                      | 98.84321 | 93.83603 | 87.96087 | 88.722   | 83.14053 | 88.89436 |
| 17513681 | Mvd      | mevalonate (diphospho) decarboxylase                                          | 26.62335 | 22.82353 | 24.91461 | 22.82353 | 25.95859 | 24.5733  |
| 17440954 | Mvk      | mevalonate kinase                                                             | 25.09869 | 24.91599 | 26.72782 | 31.00932 | 30.05869 | 18.64349 |
| 17399086 | Mex3a    | mex3 homolog A (C. elegans)                                                   | 13.43393 | 12.54508 | 11.71066 | 13.19171 | 12.34881 | 14.46205 |
| 17479834 | Mex3b    | mex3 homolog B (C. elegans)                                                   | 8.467112 | 8.467112 | 9.047944 | 9.023893 | 7.055166 | 5.97397  |
| 17351681 | Mex3c    | mex3 homolog C (C. elegans)                                                   | 66.53723 | 57.83536 | 58.56878 | 54.68715 | 62.49115 | 59.90647 |
| 17242902 | Mex3d    | mex3 homolog D (C. elegans)                                                   | 12.48921 | 12.90385 | 11.36401 | 13.3577  | 13.55309 | 14.16423 |
| 17319050 | Mfng     | MFNG O-fucosylpeptide 3-beta-N-acetylglucosaminyltransferase                  | 11.38467 | 13.21523 | 14.98108 | 13.1224  | 13.43431 | 13.1224  |
| 17237006 | Mgat4c   | MGAT4 family, member C                                                        | 2.677506 | 2.824313 | 2.643098 | 2.630998 | 3.050742 | 2.563722 |
| 17502908 | Mgat4d   | MGAT4 family, member C                                                        | 3.33138  | 3.194965 | 3.194965 | 3.194965 | 2.534041 | 4.155724 |
| 17227149 | Mgat4e   | MGAT4 family, member E                                                        | 3.703322 | 3.363679 | 3.219485 | 3.703322 | 6.043231 | 2.943087 |
| 17474342 | Mill1    | MHC I like leukocyte 1                                                        | 6.33059  | 5.481649 | 5.771275 | 6.171709 | 4.397794 | 5.261995 |
| 17474363 | Mill2    | MHC I like leukocyte 2                                                        | 11.19234 | 8.874587 | 11.79734 | 10.59139 | 16.19403 | 10.29977 |
| 17481899 | Micalcl  | MICAL C-terminal like                                                         | 15.14248 | 11.42261 | 11.23509 | 11.25411 | 8.836837 | 9.426159 |
| 17454428 | Micall2  | MICAL-like 2                                                                  | 7.040754 | 11.37559 | 10.71545 | 9.507065 | 10.22175 | 10.14052 |
| 17499540 | Mcph1    | microcephaly, primary autosomal recessive 1                                   | 8.357839 | 7.246327 | 8.443727 | 8.146554 | 6.966963 | 6.524964 |
| 17462663 | Mfap5    | microfibrillar associated protein 5                                           | 4.428536 | 5.570358 | 5.29342  | 4.495402 | 5.480927 | 5.231229 |
| 17390626 | Mfap1a   | microfibrillar-associated protein 1A                                          | 25.991   | 21.92386 | 27.21896 | 25.16715 | 36.12411 | 31.30042 |
| 17390614 | Mfap1b   | microfibrillar-associated protein 1B                                          | 13.63412 | 6.828695 | 11.87685 | 7.407003 | 7.863873 | 7.373195 |
| 17420951 | Mfap2    | microfibrillar-associated protein 2                                           | 11.96659 | 10.95639 | 11.09517 | 11.32147 | 10.08179 | 11.90883 |
| 17249888 | Mfap3    | microfibrillar-associated protein 3                                           | 35.66606 | 35.90319 | 32.17593 | 33.29445 | 31.60345 | 26.51285 |
| 17501346 | Mfap3l   | microfibrillar-associated protein 3-like                                      | 4.015807 | 4.086116 | 5.946126 | 5.144426 | 4.327879 | 4.609116 |
| 17250585 | Mfap4    | microfibrillar-associated protein 4                                           | 4.070511 | 4.754851 | 5.90624  | 4.925124 | 4.315178 | 5.00167  |
| 17461132 | Mitf     | microphthalmia-associated transcription factor                                | 23.0723  | 18.57332 | 18.68618 | 17.28106 | 19.30028 | 18.145   |
| 17326032 | Morc1    | microorchidia 1                                                               | 3.687952 | 3.144956 | 3.387662 | 4.148357 | 3.14415  | 3.463859 |
| 17246636 | Morc2a   | microorchidia 2A                                                              | 23.24261 | 28.23984 | 30.12084 | 28.47907 | 29.64897 | 30.27846 |
| 17343542 | Morc2b   | microorchidia 2B                                                              | 4.998343 | 4.425652 | 4.962716 | 4.801649 | 4.190551 | 4.536941 |
| 17327311 | Morc3    | microorchidia 3                                                               | 19.00412 | 25.68546 | 27.24746 | 21.90715 | 22.03034 | 28.44829 |
| 17544878 | Morc4    | microorchidia 4                                                               | 4.401545 | 7.776656 | 9.07055  | 5.402997 | 5.845312 | 5.547778 |
| 17516408 | Mir100   | microRNA 100                                                                  | 2.927157 | 2.446315 | 2.106927 | 2.531513 | 2.489162 | 2.597583 |
| 17427623 | Mir101a  | microRNA 101a                                                                 | 22.6497  | 24.77117 | 24.63777 | 28.50731 | 21.99357 | 25.04881 |
| 17358515 | Mir101b  | microRNA 101b                                                                 | 2.481049 | 2.481049 | 2.528567 | 2.271303 | 2.541781 | 2.623295 |
| 17523680 | Mir101c  | microRNA 101c                                                                 | 2.343703 | 2.703765 | 3.783575 | 3.24098  | 3.089578 | 2.953407 |
| 17248486 | Mir103-1 | microRNA 103-1                                                                | 3.10009  | 2.332359 | 2.175565 | 2.278525 | 2.495156 | 2.288465 |
| 17376508 | Mir103-2 | microRNA 103-2                                                                | 3.079999 | 3.134793 | 4.878271 | 4.759038 | 5.350078 | 4.073475 |
| 17542237 | Mir105   | microRNA 105                                                                  | 2.499553 | 2.285991 | 2.492753 | 2.304206 | 2.161256 | 2.285991 |
| 17454254 | Mir106b  | microRNA 106b                                                                 | 5.48933  | 4.95536  | 4.904071 | 6.780962 | 5.302821 | 3.674709 |
| 17364163 | Mir107   | microRNA 107                                                                  | 11.07834 | 14.56385 | 25.97767 | 13.1417  | 19.01545 | 11.65793 |
| 17255602 | Mir10a   | microRNA 10a                                                                  | 2.332117 | 2.332117 | 2.637132 | 2.233444 | 2.291909 | 2.332117 |
| 17372106 | Mir10b   | microRNA 10b                                                                  | 2.666339 | 2.42264  | 2.42264  | 2.42264  | 2.42264  | 3.339703 |
| 17449106 | Mir1187  | microRNA 1187                                                                 | 2.363951 | 2.032901 | 1.787707 | 2.429215 | 2.148396 | 2.410195 |
| 17278751 | Mir1188  | microRNA 1188                                                                 | 10.16233 | 10.99267 | 11.68358 | 12.86697 | 11.51386 | 12.03563 |
| 17283343 | Mir1190  | microRNA 1190                                                                 | 22.81578 | 27.09134 | 18.81798 | 21.71349 | 16.75465 | 15.19674 |
| 17475536 | Mir1191  | microRNA 1191                                                                 | 52.66199 | 60.42778 | 47.10636 | 40.79838 | 43.55028 | 34.65808 |
| 17358219 | Mir1192  | microRNA 1192                                                                 | 10.16607 | 9.684651 | 12.75437 | 8.893739 | 9.149989 | 17.3962  |
| 17278824 | Mir1193  | microRNA 1193                                                                 | 4.943764 | 4.649804 | 4.69082  | 4.817885 | 4.935273 | 6.510688 |
| 17346950 | Mir1195  | microRNA 1195                                                                 | 136.366  | 195.2272 | 203.5614 | 176.808  | 127.1652 | 206.6277 |
| 17278812 | Mir1197  | microRNA 1197                                                                 | 2.392535 | 2.039817 | 2.528462 | 2.20852  | 2.730945 | 2.356915 |
| 17533002 | Mir1198  | microRNA 1198                                                                 | 21.64407 | 32.82106 | 25.01913 | 25.70772 | 23.87006 | 17.12901 |
| 17351321 | Mir122   | microRNA 122                                                                  | 6.030928 | 5.671892 | 4.645166 | 8.55525  | 6.030928 | 5.917427 |
| 17323999 | Mir1224  | microRNA 1224                                                                 | 2.280357 | 2.513225 | 1.848865 | 2.551897 | 2.473819 | 3.187488 |

|          |           |                 |          |          |          |          |          |          |
|----------|-----------|-----------------|----------|----------|----------|----------|----------|----------|
| 17320035 | Mir1249   | microRNA 1249   | 6.988874 | 4.790081 | 5.518668 | 4.535464 | 3.729055 | 5.56106  |
| 17301291 | Mir124a-1 | microRNA 124a-1 | 9.375138 | 8.072581 | 8.420524 | 8.253065 | 7.459195 | 8.253065 |
| 17396190 | Mir124a-2 | microRNA 124a-2 | 7.761201 | 11.85439 | 8.590785 | 9.986575 | 6.588591 | 6.100511 |
| 17380877 | Mir124a-3 | microRNA 124a-3 | 2.21163  | 2.118995 | 1.81162  | 1.724203 | 2.039775 | 2.029255 |
| 17244232 | Mir1251   | microRNA 1251   | 3.038249 | 3.187201 | 2.706147 | 3.462754 | 3.338963 | 2.953407 |
| 17333729 | Mir125a   | microRNA 125a   | 2.737331 | 3.057389 | 3.607351 | 3.923252 | 3.394714 | 2.894271 |
| 17516420 | Mir125b-1 | microRNA 125b-1 | 2.379503 | 2.095493 | 2.497475 | 2.439372 | 2.300217 | 2.594632 |
| 17326704 | Mir125b-2 | microRNA 125b-2 | 2.187677 | 2.198638 | 2.183118 | 2.161646 | 2.235566 | 2.124068 |
| 17538433 | Mir1264   | microRNA 1264   | 2.697289 | 2.245567 | 2.250367 | 2.088128 | 2.216249 | 2.530215 |
| 17368347 | Mir126a   | microRNA 126a   | 2.873721 | 3.554213 | 3.360044 | 3.263862 | 2.37764  | 2.840018 |
| 17216868 | Mir128-1  | microRNA 128-1  | 3.373392 | 3.059615 | 3.059615 | 3.059615 | 3.015736 | 2.933047 |
| 17531799 | Mir128-2  | microRNA 128-2  | 5.135554 | 4.890731 | 4.540528 | 7.522019 | 7.58423  | 3.238599 |
| 17456543 | Mir129-1  | microRNA 129-1  | 3.104864 | 2.67402  | 1.898013 | 2.230814 | 2.715824 | 2.688497 |
| 17388592 | Mir129-2  | microRNA 129-2  | 2.462869 | 1.864489 | 1.818211 | 2.90595  | 3.211417 | 2.24915  |
| 17538435 | Mir1298   | microRNA 1298   | 3.548133 | 3.129018 | 2.899512 | 2.771794 | 2.933697 | 3.069939 |
| 17387512 | Mir130a   | microRNA 130a   | 2.437631 | 1.946659 | 1.866778 | 2.151332 | 2.192201 | 2.821319 |
| 17328621 | Mir130b   | microRNA 130b   | 3.726703 | 3.790952 | 3.959971 | 4.33827  | 4.301441 | 3.959862 |
| 17252880 | Mir132    | microRNA 132    | 3.74566  | 3.429338 | 3.875977 | 3.153754 | 4.464814 | 3.473909 |
| 17352693 | Mir133a-1 | microRNA 133a-1 | 3.764478 | 2.316843 | 2.281385 | 2.036907 | 3.749479 | 2.297667 |
| 17380764 | Mir133a-2 | microRNA 133a-2 | 5.100363 | 4.723741 | 3.28481  | 3.847256 | 5.45765  | 4.156301 |
| 17211367 | Mir133b   | microRNA 133b   | 3.728951 | 4.92369  | 3.939793 | 4.729081 | 4.286292 | 4.344891 |
| 17278854 | Mir134    | microRNA 134    | 21.26561 | 26.15854 | 21.28979 | 22.98642 | 23.6812  | 22.59858 |
| 17521141 | Mir135a-1 | microRNA 135a-1 | 5.512474 | 3.485124 | 3.737828 | 3.26574  | 4.114879 | 4.030783 |
| 17244215 | Mir135a-2 | microRNA 135a-2 | 2.172702 | 2.172702 | 1.907377 | 1.95297  | 2.48239  | 2.082361 |
| 17217169 | Mir135b   | microRNA 135b   | 4.184253 | 4.801649 | 4.801649 | 4.031984 | 5.052299 | 3.944466 |
| 17278713 | Mir136    | microRNA 136    | 2.391921 | 2.387499 | 1.986254 | 2.076768 | 2.271145 | 2.325998 |
| 17402109 | Mir137    | microRNA 137    | 2.071061 | 1.938768 | 2.185813 | 2.185813 | 2.060051 | 1.865006 |
| 17523434 | Mir138-1  | microRNA 138-1  | 3.707714 | 3.211729 | 4.106844 | 4.181904 | 3.395043 | 3.440886 |
| 17503972 | Mir138-2  | microRNA 138-2  | 3.269251 | 3.016028 | 4.115136 | 3.628844 | 4.289115 | 3.818537 |
| 17480922 | Mir139    | microRNA 139    | 6.995562 | 10.32937 | 8.259704 | 7.645972 | 6.269281 | 14.27096 |
| 17505309 | Mir140    | microRNA 140    | 2.965407 | 2.426875 | 2.772832 | 3.27985  | 2.932803 | 3.597438 |
| 17470792 | Mir141    | microRNA 141    | 2.468167 | 2.192383 | 1.751899 | 2.45668  | 2.345946 | 2.154256 |
| 17254838 | Mir142    | microRNA 142    | 17.09864 | 10.1102  | 11.87676 | 11.50269 | 10.20066 | 11.47753 |
| 17354793 | Mir143    | microRNA 143    | 19.29948 | 30.54173 | 25.23685 | 15.43357 | 18.89719 | 19.88019 |
| 17253448 | Mir144    | microRNA 144    | 2.406006 | 1.898013 | 2.110156 | 2.31474  | 2.072138 | 2.072138 |
| 17354791 | Mir145a   | microRNA 145a   | 2.406006 | 2.420844 | 2.525344 | 2.332731 | 2.420844 | 2.150974 |
| 17261942 | Mir146    | microRNA 146    | 2.060051 | 2.060051 | 2.033704 | 2.060051 | 2.283584 | 2.024225 |
| 17360018 | Mir146b   | microRNA 146b   | 6.752679 | 5.080463 | 5.617429 | 6.708359 | 5.617429 | 5.912589 |
| 17466758 | Mir148a   | microRNA 148a   | 2.815498 | 2.221047 | 2.393646 | 2.412702 | 3.263862 | 2.672704 |
| 17315568 | Mir148b   | microRNA 148b   | 3.882403 | 2.542892 | 3.062691 | 2.652568 | 2.848021 | 3.618671 |
| 17215832 | Mir149    | microRNA 149    | 14.60085 | 23.24357 | 15.50015 | 11.97829 | 14.84433 | 21.58908 |
| 17477693 | Mir150    | microRNA 150    | 4.241487 | 5.769835 | 4.803913 | 3.703322 | 4.636544 | 3.535686 |
| 17317898 | Mir151    | microRNA 151    | 3.959285 | 4.118446 | 3.374374 | 3.365615 | 4.242839 | 4.683769 |
| 17255674 | Mir152    | microRNA 152    | 5.122471 | 6.004774 | 6.371796 | 6.073424 | 6.867952 | 6.025997 |
| 17279668 | Mir153    | microRNA 153    | 2.4474   | 2.420844 | 2.084368 | 2.606909 | 2.627754 | 2.729487 |
| 17278878 | Mir154    | microRNA 154    | 2.321987 | 2.882579 | 2.362084 | 2.533374 | 2.335692 | 2.435554 |
| 17326794 | Mir155    | microRNA 155    | 3.481671 | 3.401144 | 3.495261 | 3.636977 | 3.053619 | 3.850431 |
| 17307518 | Mir15a    | microRNA 15a    | 14.57749 | 14.37958 | 16.23595 | 16.23595 | 16.94303 | 17.83229 |
| 17398264 | Mir15b    | microRNA 15b    | 2.074797 | 1.870962 | 1.924815 | 2.187177 | 2.263131 | 2.075228 |
| 17307516 | Mir16-1   | microRNA 16-1   | 16.54989 | 26.23771 | 24.36689 | 16.90502 | 26.44274 | 19.21485 |
| 17398266 | Mir16-2   | microRNA 16-2   | 2.432922 | 3.869186 | 3.594447 | 2.967298 | 4.204721 | 3.480151 |
| 17302632 | Mir17     | microRNA 17     | 8.375759 | 6.791263 | 7.094938 | 5.932993 | 7.279756 | 6.233144 |
| 17302634 | Mir18     | microRNA 18     | 3.362397 | 2.828917 | 3.784834 | 3.737154 | 2.850134 | 3.362397 |
| 17217844 | Mir181a-1 | microRNA 181a-1 | 2.141854 | 2.084585 | 2.275305 | 2.606909 | 2.040652 | 2.04269  |
| 17370483 | Mir181a-2 | microRNA 181a-2 | 17.62364 | 17.77774 | 13.49217 | 14.74782 | 18.40212 | 13.21047 |
| 17217846 | Mir181b-1 | microRNA 181b-1 | 4.01461  | 2.917758 | 2.255364 | 2.67402  | 4.490139 | 2.178825 |
| 17370485 | Mir181b-2 | microRNA 181b-2 | 3.095173 | 3.095173 | 3.099746 | 2.716314 | 3.57886  | 2.410646 |
| 17511075 | Mir181c   | microRNA 181c   | 18.05579 | 21.69183 | 16.83206 | 20.56644 | 19.66925 | 29.98481 |
| 17511073 | Mir181d   | microRNA 181d   | 108.7062 | 96.18767 | 112.3729 | 125.4223 | 112.1806 | 114.6641 |
| 17465478 | Mir182    | microRNA 182    | 2.891784 | 3.362886 | 2.543544 | 2.851676 | 3.317186 | 2.370876 |
| 17465482 | Mir183    | microRNA 183    | 3.63063  | 3.437906 | 3.613683 | 3.560402 | 4.093259 | 3.713347 |
| 17479703 | Mir1839   | microRNA 1839   | 3.92385  | 3.654718 | 3.339703 | 3.107124 | 4.843769 | 4.083454 |
| 17529645 | Mir184    | microRNA 184    | 5.596908 | 5.279349 | 6.050398 | 5.335783 | 5.616339 | 5.694464 |
| 17328933 | Mir185    | microRNA 185    | 39.99894 | 55.74962 | 52.08081 | 62.77073 | 52.806   | 50.83323 |
| 17403864 | Mir186    | microRNA 186    | 8.387844 | 3.213376 | 2.960621 | 6.922773 | 2.044148 | 5.209446 |
| 17353141 | Mir187    | microRNA 187    | 126.8905 | 150.9775 | 115.5609 | 158.8179 | 132.7971 | 144.2532 |
| 17539824 | Mir188    | microRNA 188    | 10.16607 | 10.3546  | 9.421064 | 11.43473 | 16.43763 | 6.931656 |
| 17410508 | Mir1895   | microRNA 1895   | 11.19878 | 9.310251 | 9.166811 | 9.310251 | 9.47634  | 9.310251 |
| 17285654 | Mir1896   | microRNA 1896   | 6.511004 | 8.631911 | 6.860815 | 6.326861 | 6.860815 | 8.584952 |
| 17310430 | Mir1898   | microRNA 1898   | 14.28798 | 26.12846 | 22.96126 | 24.85407 | 24.43522 | 29.86057 |
| 17514621 | Mir1899   | microRNA 1899   | 6.936318 | 7.698994 | 6.029256 | 6.171709 | 5.74549  | 6.060513 |
| 17541703 | Mir18b    | microRNA 18b    | 2.67402  | 2.426505 | 2.038955 | 2.475311 | 2.445314 | 1.953133 |
| 17524582 | Mir1900   | microRNA 1900   | 3.062691 | 3.382688 | 4.003745 | 3.298111 | 3.062691 | 3.42276  |
| 17352710 | Mir1901   | microRNA 1901   | 8.85382  | 6.283159 | 3.611204 | 6.700552 | 5.741867 | 6.041472 |
| 17289792 | Mir1904   | microRNA 1904   | 2.655991 | 2.425143 | 2.576245 | 2.900939 | 3.38562  | 2.520937 |
| 17406805 | Mir1905   | microRNA 1905   | 14.99199 | 19.91081 | 18.49649 | 16.32544 | 19.82172 | 13.64698 |
| 17543104 | Mir1906-1 | microRNA 1906-1 | 7.407979 | 5.915787 | 6.448797 | 7.453975 | 4.514731 | 7.453975 |
| 17316977 | Mir1907   | microRNA 1907   | 3.200484 | 3.317255 | 3.106694 | 3.369069 | 3.264586 | 3.250023 |
| 17399581 | Mir190b   | microRNA 190b   | 2.536501 | 2.01581  | 1.749085 | 2.14487  | 2.830467 | 2.17644  |
| 17521854 | Mir191    | microRNA 191    | 3.190738 | 3.517621 | 4.289888 | 4.267822 | 4.162442 | 5.708295 |
| 17538431 | Mir1912   | microRNA 1912   | 2.852565 | 2.931543 | 2.938643 | 2.474042 | 2.638101 | 2.964235 |
| 17356741 | Mir192    | microRNA 192    | 2.627881 | 2.301317 | 3.563611 | 4.565396 | 3.388249 | 2.670093 |
| 17228788 | Mir1927   | microRNA 1927   | 6.992896 | 4.796294 | 6.231502 | 7.188546 | 6.177101 | 4.659871 |
| 17224254 | Mir1928   | microRNA 1928   | 2.933494 | 2.0097   | 1.994352 | 2.450422 | 2.458673 | 1.878759 |

|          |           |                 |          |          |          |          |          |          |
|----------|-----------|-----------------|----------|----------|----------|----------|----------|----------|
| 17233072 | Mir1929   | microRNA 1929   | 10.04726 | 7.743684 | 10.04726 | 13.77423 | 7.634269 | 9.23102  |
| 17234705 | Mir1930   | microRNA 1930   | 4.289888 | 5.535524 | 3.536053 | 4.20927  | 3.966042 | 5.314743 |
| 17236525 | Mir1931   | microRNA 1931   | 5.386134 | 4.68562  | 6.464102 | 5.932252 | 4.120702 | 6.689832 |
| 17259076 | Mir1932   | microRNA 1932   | 21.87392 | 31.24471 | 30.96679 | 30.35474 | 31.78821 | 37.03789 |
| 17260931 | Mir1933   | microRNA 1933   | 17.89283 | 22.87928 | 24.90045 | 26.36112 | 17.22521 | 21.74754 |
| 17251719 | Mir1934   | microRNA 1934   | 2.474025 | 2.277988 | 2.652182 | 2.229608 | 2.322116 | 2.411248 |
| 17283475 | Mir1936   | microRNA 1936   | 4.007799 | 2.965098 | 2.989926 | 4.121673 | 3.404847 | 4.30001  |
| 17280867 | Mir1938   | microRNA 1938   | 15.82595 | 19.3288  | 14.35807 | 15.24865 | 10.97767 | 14.46425 |
| 17253835 | Mir193a   | microRNA 193a   | 2.927441 | 2.809065 | 3.036607 | 2.843209 | 3.040798 | 3.604827 |
| 17323038 | Mir193b   | microRNA 193b   | 7.175503 | 6.982676 | 7.543427 | 8.154859 | 6.979482 | 5.637869 |
| 17315198 | Mir1941   | microRNA 1941   | 4.22081  | 3.954458 | 5.233514 | 3.590961 | 3.173423 | 5.803567 |
| 17220529 | Mir194-1  | microRNA 194-1  | 16.88348 | 9.789804 | 8.905768 | 9.488237 | 12.3323  | 13.93422 |
| 17318405 | Mir1942   | microRNA 1942   | 2.176425 | 2.374922 | 2.793009 | 2.637644 | 2.485248 | 2.313777 |
| 17356739 | Mir194-2  | microRNA 194-2  | 6.753849 | 6.610274 | 5.369322 | 7.281875 | 4.147523 | 5.310545 |
| 17319205 | Mir1943   | microRNA 1943   | 12.84077 | 19.91661 | 25.39742 | 10.44717 | 5.914598 | 22.2279  |
| 17328220 | Mir1945   | microRNA 1945   | 17.60093 | 25.0966  | 21.55499 | 34.3579  | 22.82828 | 12.41085 |
| 17329842 | Mir1946a  | microRNA 1946a  | 77.99393 | 105.9463 | 117.6641 | 95.1611  | 82.57596 | 104.5645 |
| 17524746 | Mir1946b  | microRNA 1946b  | 3.712626 | 2.480516 | 2.461333 | 3.226142 | 2.618372 | 2.904601 |
| 17324996 | Mir1947   | microRNA 1947   | 2.659804 | 3.132642 | 2.95609  | 1.898013 | 3.295255 | 2.549227 |
| 17348589 | Mir1948   | microRNA 1948   | 25.96111 | 19.16192 | 17.22235 | 32.77673 | 21.69409 | 19.57527 |
| 17349549 | Mir1949   | microRNA 1949   | 2.816669 | 1.985896 | 3.009972 | 2.953407 | 2.584974 | 2.953407 |
| 17358872 | Mir1950   | microRNA 1950   | 3.234046 | 2.004219 | 1.70818  | 2.535886 | 2.184465 | 2.004219 |
| 17374421 | Mir1951   | microRNA 1951   | 7.521811 | 5.754258 | 7.521811 | 6.171709 | 7.935109 | 6.04277  |
| 17376889 | Mir1952   | microRNA 1952   | 4.371626 | 3.429956 | 2.847686 | 2.973949 | 2.994988 | 3.729055 |
| 17392892 | Mir1953   | microRNA 1953   | 4.642365 | 4.537256 | 6.488028 | 6.523065 | 5.265498 | 4.0847   |
| 17369948 | Mir1954   | microRNA 1954   | 81.88686 | 75.2229  | 77.60728 | 96.43066 | 92.59356 | 74.64274 |
| 17373482 | Mir1955   | microRNA 1955   | 5.338965 | 3.883991 | 3.164703 | 3.703322 | 3.729055 | 3.703322 |
| 17403148 | Mir1956   | microRNA 1956   | 67.45437 | 101.0125 | 84.94576 | 79.683   | 73.19332 | 75.99697 |
| 17417858 | Mir1957a  | microRNA 1957a  | 12.09199 | 18.98608 | 22.58542 | 21.21746 | 13.0799  | 9.901589 |
| 17425179 | Mir1958   | microRNA 1958   | 2.268785 | 2.232763 | 2.034395 | 2.147384 | 1.898908 | 2.15729  |
| 17252011 | Mir195a   | microRNA 195a   | 5.424951 | 5.555397 | 7.143148 | 5.507204 | 4.639148 | 4.94164  |
| 17435769 | Mir1960   | microRNA 1960   | 5.937971 | 8.829489 | 14.56506 | 10.95996 | 11.623   | 6.517596 |
| 17449793 | Mir1961   | microRNA 1961   | 2.778064 | 2.307179 | 2.486472 | 2.226535 | 2.160297 | 2.374938 |
| 17484261 | Mir1962   | microRNA 1962   | 4.214642 | 3.612431 | 3.703322 | 3.587453 | 3.703322 | 3.633626 |
| 17488713 | Mir1963   | microRNA 1963   | 27.72701 | 27.72701 | 31.58746 | 32.29435 | 31.89437 | 34.48483 |
| 17476186 | Mir1964   | microRNA 1964   | 15.87693 | 17.32184 | 19.42241 | 15.70139 | 12.3752  | 14.69354 |
| 17506718 | Mir1967   | microRNA 1967   | 2.566478 | 2.648233 | 2.646526 | 1.947428 | 2.438172 | 2.473956 |
| 17507571 | Mir1968   | microRNA 1968   | 8.991925 | 5.000561 | 6.218859 | 7.642793 | 7.820929 | 5.652935 |
| 17502084 | Mir1969   | microRNA 1969   | 6.117703 | 4.330279 | 3.476342 | 4.448318 | 3.654996 | 3.578661 |
| 17255556 | Mir196a-1 | microRNA 196a-1 | 3.987792 | 3.883991 | 3.699499 | 5.249063 | 4.407284 | 5.350783 |
| 17315505 | Mir196a-2 | microRNA 196a-2 | 12.08847 | 10.30448 | 10.34635 | 12.83614 | 9.310251 | 10.95153 |
| 17544687 | Mir1970   | microRNA 1970   | 8.660258 | 6.455058 | 4.619382 | 5.288065 | 5.699242 | 4.314849 |
| 17308815 | Mir1971   | microRNA 1971   | 2.760309 | 2.941618 | 3.521378 | 2.857236 | 3.713836 | 2.765442 |
| 17230750 | Mir1981   | microRNA 1981   | 14.14294 | 15.4371  | 18.72197 | 18.21809 | 18.49585 | 20.1383  |
| 17291026 | Mir1983   | microRNA 1983   | 2.647646 | 2.528812 | 2.578282 | 3.04867  | 3.206679 | 3.047698 |
| 17524722 | Mir199a-1 | microRNA 199a-1 | 3.374608 | 2.703016 | 2.684791 | 2.577192 | 2.919376 | 3.339703 |
| 17369787 | Mir199b   | microRNA 199b   | 2.522772 | 1.910433 | 2.653966 | 2.127693 | 2.941924 | 2.216679 |
| 17302636 | Mir19a    | microRNA 19a    | 2.518125 | 2.239691 | 2.188512 | 2.606909 | 2.314082 | 2.763468 |
| 17541699 | Mir19b-2  | microRNA 19b-2  | 2.021982 | 1.964565 | 1.77617  | 2.653856 | 2.853752 | 2.207189 |
| 17380762 | Mir1a-1   | microRNA 1a-1   | 1.851571 | 2.070774 | 1.973354 | 1.896908 | 1.791155 | 2.14481  |
| 17352695 | Mir1a-2   | microRNA 1a-2   | 2.114402 | 1.870637 | 1.964797 | 2.157484 | 2.263492 | 1.769571 |
| 17348398 | Mir1b     | microRNA 1b     | 11.5933  | 12.27422 | 11.5933  | 10.97158 | 10.48228 | 12.56135 |
| 17433973 | Mir200a   | microRNA 200a   | 4.319397 | 4.165299 | 3.107081 | 3.703322 | 5.453226 | 3.420649 |
| 17433975 | Mir200b   | microRNA 200b   | 6.222913 | 5.163324 | 6.193994 | 5.196931 | 5.595744 | 5.914188 |
| 17470794 | Mir200c   | microRNA 200c   | 6.376921 | 5.301608 | 5.787378 | 5.64213  | 5.517214 | 6.110498 |
| 17542115 | Mir201    | microRNA 201    | 2.130925 | 2.08174  | 2.08174  | 1.896028 | 2.020413 | 2.463074 |
| 17497509 | Mir202    | microRNA 202    | 5.001566 | 4.368022 | 4.980222 | 5.41875  | 5.43018  | 4.794067 |
| 17279297 | Mir203    | microRNA 203    | 2.946312 | 2.453719 | 2.036469 | 2.52876  | 2.782767 | 2.172702 |
| 17358210 | Mir204    | microRNA 204    | 2.204605 | 2.131886 | 2.00215  | 1.941713 | 2.015014 | 1.697545 |
| 17231272 | Mir205    | microRNA 205    | 3.2375   | 3.00297  | 2.954635 | 3.079444 | 3.453622 | 2.540637 |
| 17211365 | Mir206    | microRNA 206    | 1.785416 | 1.909679 | 2.160103 | 1.857729 | 2.188921 | 2.69785  |
| 17306575 | Mir208a   | microRNA 208a   | 2.283917 | 2.338543 | 2.743086 | 2.334074 | 2.709018 | 2.49037  |
| 17306623 | Mir208b   | microRNA 208b   | 2.188921 | 2.019741 | 2.170368 | 2.096307 | 2.188921 | 2.334591 |
| 17302638 | Mir20a    | microRNA 20a    | 3.409665 | 2.322229 | 2.67402  | 2.610688 | 3.331888 | 2.481049 |
| 17541701 | Mir20b    | microRNA 20b    | 5.625066 | 2.676208 | 2.261281 | 2.659804 | 3.197069 | 2.015461 |
| 17497811 | Mir210    | microRNA 210    | 31.09369 | 48.13619 | 44.98244 | 43.75603 | 41.53081 | 48.42399 |
| 17478862 | Mir211    | microRNA 211    | 4.01461  | 3.657429 | 3.640433 | 3.729055 | 4.545881 | 3.729055 |
| 17252878 | Mir212    | microRNA 212    | 9.848541 | 11.04055 | 8.394242 | 9.015828 | 9.535377 | 10.01514 |
| 17521041 | Mir2136   | microRNA 2136   | 2.872506 | 2.159519 | 2.293228 | 2.953407 | 5.538364 | 2.953407 |
| 17535471 | Mir2137   | microRNA 2137   | 27.69781 | 47.82656 | 41.42788 | 33.72181 | 22.97161 | 33.34134 |
| 17220531 | Mir215    | microRNA 215    | 3.878019 | 3.263862 | 2.855058 | 5.969044 | 3.962909 | 3.878019 |
| 17247944 | Mir216a   | microRNA 216a   | 1.981345 | 2.578461 | 2.404355 | 2.451407 | 2.388939 | 2.344077 |
| 17247937 | Mir216b   | microRNA 216b   | 2.67402  | 2.326337 | 2.775639 | 3.19076  | 3.127175 | 2.422203 |
| 17247946 | Mir217    | microRNA 217    | 2.888659 | 2.027483 | 2.589637 | 2.360398 | 2.483268 | 2.169782 |
| 17437353 | Mir218-1  | microRNA 218-1  | 4.217769 | 5.668865 | 7.11222  | 4.325    | 5.309367 | 5.528201 |
| 17248474 | Mir218-2  | microRNA 218-2  | 8.820864 | 11.87191 | 10.66166 | 10.55043 | 9.036036 | 10.37292 |
| 17343733 | Mir219a-1 | microRNA 219a-1 | 10.86977 | 8.8556   | 6.501353 | 7.814535 | 8.576328 | 7.179682 |
| 17383520 | Mir219a-2 | microRNA 219a-2 | 9.396803 | 9.475749 | 8.347765 | 8.420524 | 7.13622  | 9.310251 |
| 17252906 | Mir22     | microRNA 22     | 20.47242 | 25.37929 | 23.91692 | 25.29447 | 27.77914 | 24.01011 |
| 17540451 | Mir221    | microRNA 221    | 3.402158 | 2.35365  | 2.606909 | 2.606909 | 3.030719 | 3.077716 |
| 17540453 | Mir222    | microRNA 222    | 2.774927 | 2.662571 | 2.514898 | 2.982806 | 1.834148 | 3.177297 |
| 17536383 | Mir223    | microRNA 223    | 4.876649 | 5.952311 | 6.062866 | 5.48933  | 5.564492 | 5.538057 |
| 17542209 | Mir224    | microRNA 224    | 3.20408  | 2.988911 | 3.062691 | 3.758221 | 2.99314  | 3.040608 |
| 17503116 | Mir23a    | microRNA 23a    | 5.527741 | 3.369233 | 4.673586 | 3.789113 | 6.142688 | 3.127956 |

|          |           |                                                   |          |          |          |          |          |          |
|----------|-----------|---------------------------------------------------|----------|----------|----------|----------|----------|----------|
| 17503120 | Mir24-2   | microRNA 24-2                                     | 2.162035 | 2.580517 | 2.220785 | 2.154899 | 2.669353 | 2.220785 |
| 17454250 | Mir25     | microRNA 25                                       | 15.23154 | 18.8433  | 15.50713 | 15.34323 | 17.03524 | 15.11166 |
| 17522969 | Mir26a-1  | microRNA 26a-1                                    | 5.658933 | 6.13354  | 5.713006 | 7.571137 | 6.867381 | 6.352436 |
| 17214232 | Mir26b    | microRNA 26b                                      | 5.418562 | 3.265106 | 5.120306 | 4.681043 | 4.681043 | 5.320567 |
| 17503118 | Mir27a    | microRNA 27a                                      | 5.338965 | 6.383289 | 5.48933  | 5.48933  | 7.947549 | 7.169189 |
| 17324471 | Mir28a    | microRNA 28a                                      | 4.167523 | 5.458558 | 4.167523 | 3.499503 | 6.030928 | 2.606909 |
| 17502525 | Mir28b    | microRNA 28b                                      | 4.081983 | 4.414622 | 4.20927  | 4.20927  | 5.109174 | 4.759797 |
| 17317044 | Mir28c    | microRNA 28c                                      | 3.104864 | 2.67402  | 2.087534 | 2.304206 | 4.329889 | 2.67402  |
| 17473111 | Mir290a   | microRNA 290a                                     | 7.704439 | 4.873472 | 7.883739 | 6.075445 | 5.705843 | 6.171709 |
| 17395129 | Mir296    | microRNA 296                                      | 4.769341 | 7.27915  | 7.889315 | 5.79826  | 7.889315 | 3.792791 |
| 17366734 | Mir297a-2 | microRNA 297a-2                                   | 2.54039  | 5.021993 | 4.235493 | 5.119561 | 6.174148 | 5.329647 |
| 17366938 | Mir297a-4 | microRNA 297a-4                                   | 2.851874 | 3.740212 | 4.423045 | 4.658127 | 6.615912 | 4.154284 |
| 17366916 | Mir297b   | microRNA 297b                                     | 2.443434 | 3.879901 | 3.651603 | 2.885097 | 2.145494 | 2.403289 |
| 17395131 | Mir298    | microRNA 298                                      | 21.02917 | 23.39341 | 23.37979 | 27.57961 | 23.54812 | 27.85858 |
| 17278808 | Mir299a   | microRNA 299a                                     | 3.130537 | 2.699702 | 2.321199 | 2.345133 | 2.955967 | 2.038023 |
| 17283964 | Mir299b   | microRNA 299b                                     | 4.307109 | 4.566156 | 4.481091 | 4.157972 | 4.681043 | 5.164147 |
| 17465601 | Mir29a    | microRNA 29a                                      | 2.099506 | 2.060051 | 2.099506 | 2.099506 | 2.08684  | 1.811067 |
| 17465603 | Mir29b-1  | microRNA 29b-1                                    | 1.931725 | 2.045509 | 1.883766 | 2.720327 | 2.122729 | 2.060508 |
| 17278842 | Mir300    | microRNA 300                                      | 2.925818 | 2.60877  | 2.714676 | 2.714676 | 2.998789 | 2.3059   |
| 17254679 | Mir301    | microRNA 301                                      | 2.391689 | 2.391689 | 2.631563 | 2.438426 | 3.040903 | 2.32284  |
| 17328623 | Mir301b   | microRNA 301b                                     | 11.86459 | 15.68801 | 18.50098 | 12.74394 | 10.71322 | 9.716387 |
| 17402479 | Mir302a   | microRNA 302a                                     | 2.571749 | 1.749266 | 1.707127 | 2.102608 | 2.367066 | 2.306204 |
| 17402475 | Mir302b   | microRNA 302b                                     | 2.265501 | 1.86648  | 1.874298 | 2.032577 | 3.139772 | 1.981757 |
| 17402477 | Mir302c   | microRNA 302c                                     | 2.1978   | 1.795194 | 2.271429 | 1.9424   | 3.239112 | 1.756009 |
| 17402481 | Mir302d   | microRNA 302d                                     | 2.568632 | 2.590104 | 2.987089 | 2.488713 | 2.987089 | 2.316537 |
| 17244522 | Mir3058   | microRNA 3058                                     | 39.1565  | 61.04918 | 58.69762 | 60.32274 | 59.6657  | 59.53681 |
| 17237026 | Mir3059   | microRNA 3059                                     | 4.002219 | 2.847074 | 2.579301 | 3.401097 | 3.130927 | 3.786907 |
| 17246755 | Mir3060   | microRNA 3060                                     | 5.211505 | 4.115136 | 5.120306 | 4.394838 | 5.5098   | 3.993683 |
| 17249423 | Mir3061   | microRNA 3061                                     | 2.824822 | 3.544495 | 3.703322 | 4.20927  | 3.339703 | 3.339703 |
| 17259262 | Mir3065   | microRNA 3065                                     | 6.061648 | 5.922762 | 6.992896 | 7.42659  | 6.992896 | 7.630777 |
| 17274292 | Mir3066   | microRNA 3066                                     | 2.235194 | 2.268219 | 2.251677 | 2.407056 | 2.080644 | 2.137671 |
| 17276921 | Mir3067   | microRNA 3067                                     | 4.070088 | 4.764814 | 4.06975  | 5.903743 | 5.61237  | 5.513391 |
| 17282902 | Mir3068   | microRNA 3068                                     | 3.872137 | 4.385496 | 4.183731 | 4.12556  | 7.89019  | 5.746327 |
| 17278698 | Mir3070a  | microRNA 3070a                                    | 4.553324 | 3.906184 | 4.966502 | 4.49266  | 6.61229  | 4.511102 |
| 17278700 | Mir3070b  | microRNA 3070b                                    | 5.903743 | 7.136714 | 9.903785 | 3.926544 | 4.273683 | 4.03713  |
| 17279295 | Mir3073a  | microRNA 3073a                                    | 3.6742   | 4.019288 | 5.750072 | 6.656159 | 3.546707 | 3.924938 |
| 17293571 | Mir3074-1 | microRNA 3074-1                                   | 3.433096 | 2.111444 | 1.955097 | 2.258852 | 2.983674 | 2.139198 |
| 17511077 | Mir3074-2 | microRNA 3074-2                                   | 2.674539 | 2.810311 | 2.158816 | 2.368215 | 2.400109 | 2.384241 |
| 17297746 | Mir3075   | microRNA 3075                                     | 10.05555 | 10.52093 | 13.79324 | 9.851955 | 9.356896 | 10.60086 |
| 17318426 | Mir3079   | microRNA 3079                                     | 2.162035 | 2.045637 | 3.08299  | 1.990623 | 2.21324  | 2.716841 |
| 17319736 | Mir3080   | microRNA 3080                                     | 5.120306 | 4.604358 | 6.458772 | 5.679524 | 5.120306 | 4.536187 |
| 17330600 | Mir3081   | microRNA 3081                                     | 6.656621 | 6.552566 | 7.681404 | 4.210875 | 3.626254 | 3.915645 |
| 17342674 | Mir3083   | microRNA 3083                                     | 3.355505 | 3.883991 | 3.883991 | 4.794399 | 3.76957  | 5.431648 |
| 17364826 | Mir3085   | microRNA 3085                                     | 13.49516 | 11.66157 | 11.79186 | 13.97901 | 14.03853 | 8.694964 |
| 17366006 | Mir3086   | microRNA 3086                                     | 2.23202  | 2.134177 | 2.462784 | 2.503229 | 2.389436 | 2.302514 |
| 17368067 | Mir3087   | microRNA 3087                                     | 3.749998 | 2.240111 | 2.928232 | 3.441935 | 3.403101 | 3.009242 |
| 17368760 | Mir3088   | microRNA 3088                                     | 3.170235 | 6.503336 | 5.505677 | 4.166396 | 4.335685 | 4.274602 |
| 17369266 | Mir3089   | microRNA 3089                                     | 5.023003 | 5.992176 | 5.67429  | 5.954251 | 3.847977 | 5.447257 |
| 17376683 | Mir3090   | microRNA 3090                                     | 4.681043 | 4.109406 | 4.366326 | 4.801649 | 4.25173  | 4.249226 |
| 17380747 | Mir3091   | microRNA 3091                                     | 14.7778  | 21.32701 | 17.85529 | 18.62954 | 18.62954 | 16.98654 |
| 17404462 | Mir3092   | microRNA 3092                                     | 6.171709 | 6.628535 | 7.235837 | 5.677949 | 6.737204 | 5.641426 |
| 17399008 | Mir3093   | microRNA 3093                                     | 9.379428 | 7.053699 | 5.836243 | 5.418975 | 5.118851 | 6.113803 |
| 17412846 | Mir3094   | microRNA 3094                                     | 2.200559 | 4.080568 | 3.399188 | 2.708492 | 3.399188 | 3.7955   |
| 17425701 | Mir3095   | microRNA 3095                                     | 1.96875  | 2.746758 | 2.140028 | 2.224545 | 2.625296 | 2.8513   |
| 17446066 | Mir3096   | microRNA 3096 [Source:MGI Symbol;Acc:MGI:4834311] | 4.98485  | 3.483361 | 3.919338 | 4.057441 | 3.501274 | 4.786596 |
| 17436791 | Mir3097   | microRNA 3097                                     | 3.745115 | 4.951961 | 3.909679 | 3.61148  | 5.174466 | 3.029669 |
| 17463148 | Mir3098   | microRNA 3098                                     | 5.651367 | 4.053899 | 6.442051 | 8.895403 | 11.40259 | 4.497926 |
| 17473648 | Mir3099   | microRNA 3099                                     | 2.108475 | 2.072138 | 2.058809 | 2.048091 | 2.542011 | 2.072138 |
| 17211441 | Mir30a    | microRNA 30a                                      | 2.537785 | 2.699908 | 2.479759 | 3.538064 | 2.523734 | 3.41681  |
| 17317706 | Mir30b    | microRNA 30b                                      | 3.603778 | 2.662866 | 2.736326 | 3.099617 | 2.65108  | 3.280714 |
| 17429512 | Mir30c-1  | microRNA 30c-1                                    | 3.857377 | 3.130146 | 3.774329 | 4.075876 | 3.625324 | 4.040377 |
| 17211443 | Mir30c-2  | microRNA 30c-2                                    | 13.41597 | 13.09033 | 11.59966 | 13.43012 | 13.1234  | 12.11103 |
| 17317708 | Mir30d    | microRNA 30d                                      | 6.343284 | 8.096397 | 7.683321 | 8.572346 | 6.92983  | 4.587188 |
| 17429514 | Mir30e    | microRNA 30e                                      | 2.458656 | 3.060357 | 2.379618 | 2.725706 | 3.091806 | 3.737413 |
| 17427131 | Mir31     | microRNA 31                                       | 4.681043 | 3.400036 | 4.037102 | 4.037102 | 3.764087 | 4.538545 |
| 17488148 | Mir3101   | microRNA 3101                                     | 2.495848 | 2.300998 | 2.526938 | 2.190135 | 2.514009 | 2.477852 |
| 17493867 | Mir3102   | microRNA 3102                                     | 2.517218 | 2.635086 | 2.056513 | 2.304206 | 4.180977 | 2.285991 |
| 17485419 | Mir3105   | microRNA 3105                                     | 2.447756 | 2.501234 | 2.264904 | 2.379288 | 2.413589 | 2.273807 |
| 17507786 | Mir3106   | microRNA 3106                                     | 3.083502 | 4.20927  | 3.362397 | 3.362397 | 3.476438 | 3.032232 |
| 17508132 | Mir3107   | microRNA 3107                                     | 23.49204 | 29.93663 | 32.01842 | 34.68885 | 33.64499 | 31.84864 |
| 17505326 | Mir3108   | microRNA 3108                                     | 2.191213 | 2.126543 | 2.422354 | 2.474814 | 2.640718 | 2.689746 |
| 17518980 | Mir3109   | microRNA 3109                                     | 4.102718 | 3.310915 | 4.214992 | 3.85735  | 3.532134 | 2.95001  |
| 17534335 | Mir3110   | microRNA 3110                                     | 27.46172 | 33.3825  | 28.85981 | 29.37588 | 37.5695  | 28.76116 |
| 17425521 | Mir32     | microRNA 32                                       | 3.162313 | 3.883991 | 3.494049 | 3.808044 | 3.780036 | 3.514574 |
| 17541723 | Mir322    | microRNA 322                                      | 5.528316 | 5.944024 | 5.176654 | 5.275252 | 7.206956 | 5.780643 |
| 17278814 | Mir323    | microRNA 323                                      | 2.702192 | 2.67402  | 2.891263 | 2.67402  | 2.547302 | 2.901965 |
| 17251898 | Mir324    | microRNA 324                                      | 57.37499 | 54.11513 | 42.31948 | 56.99052 | 39.04295 | 59.65909 |
| 17543928 | Mir325    | microRNA 325                                      | 3.280078 | 2.814366 | 3.357622 | 3.152836 | 3.230528 | 2.580374 |
| 17480588 | Mir326    | microRNA 326                                      | 4.991523 | 4.926353 | 6.992896 | 5.338965 | 5.98006  | 3.306558 |
| 17305590 | Mir327    | microRNA 327                                      | 3.36277  | 4.003162 | 3.460643 | 3.793238 | 3.1874   | 3.460643 |
| 17512379 | Mir328    | microRNA 328                                      | 7.187051 | 22.62789 | 22.9312  | 28.92771 | 17.69684 | 20.48264 |
| 17278818 | Mir329    | microRNA 329                                      | 8.355986 | 7.278999 | 8.51685  | 8.51685  | 6.614399 | 9.270197 |
| 17313531 | Mir33     | microRNA 33                                       | 2.3514   | 2.953407 | 2.729109 | 2.613295 | 2.505989 | 2.253629 |
| 17474527 | Mir330    | microRNA 330                                      | 13.02607 | 13.06568 | 14.83569 | 10.21396 | 10.93067 | 10.82189 |

|          |           |                 |          |          |          |          |          |          |
|----------|-----------|-----------------|----------|----------|----------|----------|----------|----------|
| 17456963 | Mir335    | microRNA 335    | 2.406006 | 2.384538 | 2.037514 | 3.198377 | 3.605327 | 2.395206 |
| 17278692 | Mir337    | microRNA 337    | 2.671611 | 2.738489 | 2.347378 | 3.396573 | 2.782767 | 2.782767 |
| 17272969 | Mir338    | microRNA 338    | 23.1593  | 29.93186 | 22.75939 | 20.60653 | 25.87165 | 25.69917 |
| 17454414 | Mir339    | microRNA 339    | 18.28933 | 24.21837 | 17.16526 | 17.16526 | 14.2072  | 22.76554 |
| 17249108 | Mir340    | microRNA 340    | 4.299921 | 4.687537 | 4.372899 | 4.607327 | 4.80095  | 3.774198 |
| 17278749 | Mir341    | microRNA 341    | 16.14662 | 20.34186 | 15.23914 | 20.71523 | 16.02742 | 22.2279  |
| 17278612 | Mir342    | microRNA 342    | 6.742577 | 6.612565 | 8.079242 | 7.793493 | 9.26204  | 6.295801 |
| 17491728 | Mir344    | microRNA 344    | 4.207141 | 3.01812  | 3.342436 | 2.770315 | 2.821398 | 3.047487 |
| 17491739 | Mir344-2  | microRNA 344-2  | 3.220199 | 2.497717 | 2.24968  | 3.112945 | 2.363689 | 2.32152  |
| 17491724 | Mir344b   | microRNA 344b   | 2.162035 | 1.883988 | 2.045509 | 2.160492 | 2.249634 | 2.130098 |
| 17491726 | Mir344c   | microRNA 344c   | 3.383954 | 2.00104  | 2.77287  | 2.458673 | 2.492598 | 2.285991 |
| 17491697 | Mir344d-1 | microRNA 344d-1 | 3.335007 | 2.619098 | 2.498271 | 3.411627 | 4.977426 | 3.258505 |
| 17491699 | Mir344d-2 | microRNA 344d-2 | 24.36858 | 21.47997 | 17.94326 | 21.46791 | 22.84236 | 30.78147 |
| 17491712 | Mir344d-3 | microRNA 344d-3 | 2.246486 | 2.462698 | 3.105122 | 2.274785 | 2.224067 | 2.256802 |
| 17491716 | Mir344e   | microRNA 344e   | 3.136097 | 2.162755 | 2.529584 | 2.162755 | 2.213854 | 2.147547 |
| 17491718 | Mir344h-1 | microRNA 344h-1 | 2.67402  | 2.67402  | 2.411465 | 2.84966  | 2.707272 | 2.65962  |
| 17491720 | Mir344h-1 | microRNA 344h-1 | 2.67402  | 2.67402  | 2.411465 | 2.84966  | 2.707272 | 2.65962  |
| 17491749 | Mir344i   | microRNA 344i   | 6.769926 | 10.35539 | 6.943774 | 8.171381 | 8.587213 | 6.786417 |
| 17491626 | Mir345    | microRNA 345    | 20.56587 | 24.92342 | 33.39893 | 30.96336 | 21.27799 | 19.72386 |
| 17298895 | Mir346    | microRNA 346    | 6.992896 | 5.901002 | 9.45364  | 9.161285 | 9.804201 | 12.22523 |
| 17423207 | Mir3471-1 | microRNA 3471-1 | 8.863583 | 8.467112 | 9.790958 | 7.723582 | 6.786934 | 6.261855 |
| 17545897 | Mir3473a  | microRNA 3473a  | 3.920017 | 2.342388 | 2.523157 | 2.451203 | 3.606376 | 2.434862 |
| 17232910 | Mir3473b  | microRNA 3473b  | 2.162035 | 1.759262 | 3.201704 | 2.272563 | 2.741832 | 2.606909 |
| 17231114 | Mir3473c  | microRNA 3473c  | 25.85856 | 22.57697 | 29.03538 | 27.55897 | 41.22764 | 29.96113 |
| 17513006 | Mir3473d  | microRNA 3473d  | 21.74573 | 25.9079  | 21.66854 | 27.90651 | 23.34724 | 23.96123 |
| 17538150 | Mir3475   | microRNA 3475   | 6.54104  | 5.556129 | 5.211758 | 8.360852 | 4.914314 | 5.095769 |
| 17421865 | Mir34a    | microRNA 34a    | 3.242845 | 4.094877 | 3.565489 | 3.434071 | 3.193548 | 3.431906 |
| 17526980 | Mir34b    | microRNA 34b    | 12.19561 | 11.37055 | 11.37055 | 10.66802 | 10.48228 | 8.181413 |
| 17526978 | Mir34c    | microRNA 34c    | 2.447112 | 2.406089 | 3.352413 | 2.544567 | 2.414727 | 3.206546 |
| 17230223 | Mir350    | microRNA 350    | 3.145371 | 3.519011 | 2.959657 | 3.450439 | 5.379157 | 4.002774 |
| 17544265 | Mir361    | microRNA 361    | 3.286997 | 2.749025 | 1.991203 | 2.665562 | 2.592026 | 2.289734 |
| 17539822 | Mir362    | microRNA 362    | 2.67402  | 2.420844 | 2.844786 | 3.034124 | 2.844786 | 2.868706 |
| 17541695 | Mir363    | microRNA 363    | 2.390098 | 4.191481 | 3.402417 | 3.983675 | 3.367061 | 4.131656 |
| 17323040 | Mir365-1  | microRNA 365-1  | 4.351673 | 3.9495   | 6.00157  | 4.590019 | 3.256066 | 4.640982 |
| 17253837 | Mir365-2  | microRNA 365-2  | 3.453741 | 3.24973  | 3.201615 | 3.402228 | 3.463834 | 3.800818 |
| 17402483 | Mir367    | microRNA 367    | 2.266427 | 1.832051 | 2.04846  | 1.898066 | 2.282208 | 2.0702   |
| 17278755 | Mir370    | microRNA 370    | 2.614455 | 2.665119 | 2.680849 | 2.902226 | 3.214    | 2.85999  |
| 17543815 | Mir374b   | microRNA 374b   | 3.253765 | 2.660025 | 2.714112 | 2.738166 | 2.537398 | 2.782111 |
| 17536995 | Mir374c   | microRNA 374c   | 2.085047 | 1.754682 | 2.058381 | 2.304206 | 2.085047 | 2.072138 |
| 17224395 | Mir375    | microRNA 375    | 27.2811  | 44.20568 | 28.38034 | 27.91812 | 26.20663 | 32.39008 |
| 17278840 | Mir376a   | microRNA 376a   | 2.36079  | 1.895055 | 2.394625 | 2.301541 | 3.00424  | 2.36079  |
| 17278838 | Mir376b   | microRNA 376b   | 2.553525 | 2.535025 | 2.014497 | 2.707554 | 2.156258 | 2.239179 |
| 17278834 | Mir376c   | microRNA 376c   | 1.942857 | 2.032225 | 2.035749 | 2.083357 | 2.592169 | 2.208581 |
| 17278882 | Mir377    | microRNA 377    | 4.160913 | 2.893609 | 2.598412 | 3.266487 | 3.485462 | 3.557146 |
| 17354755 | Mir378a   | microRNA 378a   | 1.966323 | 2.944025 | 2.944025 | 2.67402  | 2.458673 | 2.463808 |
| 17254976 | Mir378b   | microRNA 378b   | 37.33353 | 44.85043 | 38.01693 | 36.7693  | 38.48088 | 42.58933 |
| 17245661 | Mir378d   | microRNA 378d   | 6.992896 | 8.614577 | 10.1025  | 9.972464 | 3.972811 | 7.169189 |
| 17278803 | Mir379    | microRNA 379    | 2.736003 | 2.076466 | 2.304206 | 2.322567 | 2.657372 | 2.250663 |
| 17278810 | Mir380    | microRNA 380    | 2.714356 | 2.206959 | 2.798997 | 2.515805 | 2.773774 | 2.288147 |
| 17278844 | Mir381    | microRNA 381    | 2.953079 | 2.67402  | 3.078548 | 3.502318 | 3.737102 | 2.834747 |
| 17278852 | Mir382    | microRNA 382    | 2.67402  | 2.739476 | 2.739476 | 2.905628 | 2.702285 | 2.233057 |
| 17508846 | Mir383    | microRNA 383    | 4.961169 | 4.993322 | 6.992896 | 4.765475 | 4.407132 | 4.929051 |
| 17543918 | Mir384    | microRNA 384    | 2.072138 | 2.072138 | 2.034494 | 1.996731 | 2.177149 | 2.060979 |
| 17294680 | Mir3961   | microRNA 3961   | 3.200373 | 5.967472 | 9.572329 | 6.804693 | 6.14388  | 7.010513 |
| 17221010 | Mir3962   | microRNA 3962   | 11.20577 | 4.685393 | 6.839496 | 8.466701 | 5.10001  | 7.602901 |
| 17411145 | Mir3963   | microRNA 3963   | 2.11515  | 1.894504 | 1.687234 | 2.121096 | 1.915605 | 1.879241 |
| 17316268 | Mir3964   | microRNA 3964   | 2.21163  | 2.060051 | 2.596089 | 2.349233 | 2.622513 | 2.815966 |
| 17443108 | Mir3965   | microRNA 3965   | 2.305964 | 2.19249  | 1.95339  | 2.495831 | 2.883098 | 2.293197 |
| 17236798 | Mir3966   | microRNA 3966   | 2.396751 | 2.822728 | 2.822728 | 2.571607 | 2.877668 | 2.312607 |
| 17367531 | Mir3967   | microRNA 3967   | 2.425311 | 2.722987 | 2.267653 | 2.735434 | 2.450371 | 2.384902 |
| 17271905 | Mir3968   | microRNA 3968   | 10.90298 | 10.0202  | 14.45473 | 9.8815   | 10.46355 | 9.741136 |
| 17449427 | Mir3969   | microRNA 3969   | 2.162035 | 2.040157 | 2.111883 | 2.123317 | 2.885197 | 2.044985 |
| 17358719 | Mir3970   | microRNA 3970   | 2.438747 | 2.344028 | 2.214944 | 2.226998 | 2.652587 | 2.198653 |
| 17278886 | Mir409    | microRNA 409    | 11.88574 | 14.68641 | 13.13724 | 15.36845 | 12.83926 | 12.09828 |
| 17278806 | Mir411    | microRNA 411    | 2.555862 | 2.512163 | 2.164299 | 2.466012 | 2.368888 | 2.507622 |
| 17543813 | Mir421    | microRNA 421    | 3.495382 | 2.174901 | 2.691331 | 4.682049 | 2.231247 | 2.283141 |
| 17266196 | Mir423    | microRNA 423    | 4.541598 | 5.11456  | 4.544653 | 6.29218  | 6.88263  | 7.323839 |
| 17521856 | Mir425    | microRNA 425    | 13.02011 | 12.8791  | 13.02011 | 13.90903 | 15.02924 | 15.91737 |
| 17433968 | Mir429    | microRNA 429    | 10.2294  | 8.51685  | 8.266061 | 9.235179 | 8.566109 | 8.51685  |
| 17278702 | Mir431    | microRNA 431    | 8.296024 | 10.41629 | 5.513506 | 6.980401 | 5.051844 | 8.729748 |
| 17278711 | Mir432    | microRNA 432    | 30.78659 | 25.22776 | 23.38352 | 23.38352 | 28.00728 | 25.07469 |
| 17278709 | Mir434    | microRNA 434    | 2.490974 | 2.443434 | 2.406673 | 2.380179 | 2.51077  | 2.481995 |
| 17538439 | Mir448    | microRNA 448    | 4.540496 | 4.699151 | 3.624294 | 3.624294 | 3.898043 | 3.674658 |
| 17290005 | Mir449a   | microRNA 449a   | 3.054508 | 4.047357 | 3.633802 | 3.575339 | 3.714582 | 3.842672 |
| 17290003 | Mir449b   | microRNA 449b   | 1168.401 | 1406.545 | 1221.747 | 1240.297 | 1024.859 | 1209.16  |
| 17290001 | Mir449c   | microRNA 449c   | 2.600484 | 2.9716   | 2.715673 | 2.54762  | 2.676708 | 2.593535 |
| 17541717 | Mir450-1  | microRNA 450-1  | 2.508144 | 2.953407 | 2.045509 | 2.173289 | 2.143829 | 2.255364 |
| 17541719 | Mir450-2  | microRNA 450-2  | 4.529777 | 4.428107 | 5.105987 | 4.772814 | 5.844015 | 4.066422 |
| 17541715 | Mir450b   | microRNA 450b   | 1.799679 | 1.879006 | 2.179006 | 1.728703 | 2.509117 | 2.0388   |
| 17253450 | Mir451a   | microRNA 451a   | 6.076708 | 4.401301 | 4.819154 | 4.38428  | 4.25173  | 4.20927  |
| 17542211 | Mir452    | microRNA 452    | 2.406006 | 2.139999 | 2.220785 | 1.951347 | 2.323436 | 2.182165 |
| 17278876 | Mir453    | microRNA 453    | 3.642932 | 4.727246 | 4.169574 | 4.185268 | 4.708541 | 3.25363  |
| 17414727 | Mir455    | microRNA 455    | 3.923687 | 4.939175 | 4.163134 | 4.23702  | 4.671449 | 4.754884 |
| 17542076 | Mir463    | microRNA 463    | 2.220785 | 2.197556 | 2.067017 | 2.220785 | 2.561165 | 1.871896 |

|          |           |                 |          |          |          |          |          |          |
|----------|-----------|-----------------|----------|----------|----------|----------|----------|----------|
| 17542096 | Mir465    | microRNA 465    | 2.239691 | 2.239691 | 2.066043 | 2.239691 | 2.646508 | 2.41185  |
| 17542090 | Mir465b-1 | microRNA 465b-1 | 2.459645 | 2.473048 | 2.549298 | 2.640956 | 2.188921 | 2.815654 |
| 17542094 | Mir465b-1 | microRNA 465b-1 | 2.459645 | 2.473048 | 2.549298 | 2.640956 | 2.188921 | 2.815654 |
| 17542088 | Mir465c-1 | microRNA 465c-1 | 2.308011 | 1.898013 | 2.126278 | 2.041925 | 2.336712 | 2.257319 |
| 17542092 | Mir465c-1 | microRNA 465c-1 | 2.308011 | 1.898013 | 2.126278 | 2.041925 | 2.336712 | 2.257319 |
| 17366856 | Mir466b-2 | microRNA 466b-2 | 2.406006 | 1.512516 | 2.464457 | 2.304206 | 2.295073 | 2.242814 |
| 17366880 | Mir466b-3 | microRNA 466b-3 | 2.406006 | 1.759262 | 2.406006 | 2.304206 | 1.930454 | 3.628391 |
| 17366742 | Mir466b-4 | microRNA 466b-4 | 2.448198 | 1.997659 | 2.202573 | 2.304206 | 2.188921 | 2.406006 |
| 17366796 | Mir466b-4 | microRNA 466b-4 | 2.448198 | 1.997659 | 2.202573 | 2.304206 | 2.188921 | 2.406006 |
| 17366832 | Mir466b-4 | microRNA 466b-4 | 2.448198 | 1.997659 | 2.202573 | 2.304206 | 2.188921 | 2.406006 |
| 17366868 | Mir466b-4 | microRNA 466b-4 | 2.448198 | 1.997659 | 2.202573 | 2.304206 | 2.188921 | 2.406006 |
| 17366808 | Mir466b-5 | microRNA 466b-5 | 2.448198 | 1.997659 | 2.202573 | 2.304206 | 2.188921 | 2.406006 |
| 17366844 | Mir466b-5 | microRNA 466b-5 | 2.448198 | 1.997659 | 2.202573 | 2.304206 | 2.188921 | 2.406006 |
| 17366774 | Mir466c-2 | microRNA 466c-2 | 3.362397 | 2.458571 | 3.7126   | 2.953407 | 3.059021 | 2.978797 |
| 17366784 | Mir466c-2 | microRNA 466c-2 | 3.362397 | 2.458571 | 3.7126   | 2.953407 | 3.059021 | 2.978797 |
| 17366820 | Mir466c-2 | microRNA 466c-2 | 3.362397 | 2.458571 | 3.7126   | 2.953407 | 3.059021 | 2.978797 |
| 17366918 | Mir466d   | microRNA 466d   | 31.62777 | 31.62777 | 50.31268 | 21.29481 | 24.59375 | 36.52874 |
| 17366752 | Mir466e   | microRNA 466e   | 3.55308  | 2.042831 | 3.161304 | 3.043961 | 2.705096 | 3.380227 |
| 17366764 | Mir466e   | microRNA 466e   | 3.55308  | 2.042831 | 3.161304 | 3.043961 | 2.705096 | 3.380227 |
| 17288440 | Mir466f-4 | microRNA 466f-4 | 11.95971 | 17.46809 | 13.13988 | 10.39386 | 10.21941 | 10.66166 |
| 17366930 | Mir466g   | microRNA 466g   | 2.919335 | 1.734945 | 1.734945 | 2.471265 | 2.112469 | 2.262237 |
| 17366932 | Mir466h   | microRNA 466h   | 44.39176 | 36.73975 | 40.61751 | 33.14157 | 29.72717 | 49.52963 |
| 17285454 | Mir466i   | microRNA 466i   | 1.942857 | 1.838157 | 1.772346 | 1.876742 | 2.009895 | 2.173711 |
| 17233663 | Mir466j   | microRNA 466j   | 19.36178 | 28.22771 | 32.62803 | 19.40854 | 26.5966  | 18.62954 |
| 17366936 | Mir466l   | microRNA 466l   | 4.212276 | 2.723251 | 2.248776 | 2.743733 | 2.687566 | 2.684643 |
| 17366926 | Mir466n   | microRNA 466n   | 2.909578 | 2.374477 | 3.157122 | 3.432334 | 4.100842 | 3.102067 |
| 17366736 | Mir466o   | microRNA 466o   | 3.005385 | 1.886877 | 2.291036 | 2.209393 | 2.56518  | 1.969282 |
| 17366888 | Mir466p   | microRNA 466p   | 2.363066 | 2.019083 | 2.116191 | 2.08405  | 2.685815 | 2.229932 |
| 17366750 | Mir467a-1 | microRNA 467a-1 | 2.726386 | 3.04774  | 2.623077 | 4.078984 | 3.561266 | 2.35819  |
| 17366762 | Mir467a-1 | microRNA 467a-1 | 2.726386 | 3.04774  | 2.623077 | 4.078984 | 3.561266 | 2.35819  |
| 17366794 | Mir467a-1 | microRNA 467a-1 | 2.726386 | 3.04774  | 2.623077 | 4.078984 | 3.561266 | 2.35819  |
| 17366806 | Mir467a-1 | microRNA 467a-1 | 2.726386 | 3.04774  | 2.623077 | 4.078984 | 3.561266 | 2.35819  |
| 17366830 | Mir467a-1 | microRNA 467a-1 | 2.726386 | 3.04774  | 2.623077 | 4.078984 | 3.561266 | 2.35819  |
| 17366842 | Mir467a-1 | microRNA 467a-1 | 2.726386 | 3.04774  | 2.623077 | 4.078984 | 3.561266 | 2.35819  |
| 17366854 | Mir467a-1 | microRNA 467a-1 | 2.726386 | 3.04774  | 2.623077 | 4.078984 | 3.561266 | 2.35819  |
| 17366866 | Mir467a-1 | microRNA 467a-1 | 2.726386 | 3.04774  | 2.623077 | 4.078984 | 3.561266 | 2.35819  |
| 17366782 | Mir467a-3 | microRNA 467a-3 | 3.258279 | 4.216336 | 3.751636 | 5.567694 | 4.609244 | 3.355412 |
| 17366818 | Mir467a-3 | microRNA 467a-3 | 3.258279 | 4.216336 | 3.751636 | 5.567694 | 4.609244 | 3.355412 |
| 17366878 | Mir467a-3 | microRNA 467a-3 | 3.258279 | 4.216336 | 3.751636 | 5.567694 | 4.609244 | 3.355412 |
| 17366772 | Mir467b   | microRNA 467b   | 2.408809 | 3.029732 | 2.522685 | 4.194503 | 3.214936 | 2.294055 |
| 17366740 | Mir467c   | microRNA 467c   | 60.25295 | 58.45076 | 70.86395 | 57.55981 | 52.21708 | 85.07421 |
| 17366894 | Mir467d   | microRNA 467d   | 2.24862  | 2.453855 | 2.165034 | 2.931421 | 3.343085 | 2.599619 |
| 17366886 | Mir467e   | microRNA 467e   | 4.871378 | 10.54794 | 16.71336 | 11.50086 | 6.655145 | 7.117053 |
| 17264822 | Mir467f   | microRNA 467f   | 3.358949 | 2.242115 | 2.362935 | 2.334009 | 2.710446 | 2.560437 |
| 17522812 | Mir467h   | microRNA 467h   | 3.165931 | 5.531305 | 5.32171  | 3.038333 | 5.202626 | 2.824744 |
| 17467988 | Mir468    | microRNA 468    | 2.51333  | 2.51333  | 2.51333  | 2.458009 | 2.988062 | 2.426135 |
| 17542086 | Mir470    | microRNA 470    | 2.584598 | 2.562443 | 2.808247 | 2.449284 | 2.657022 | 2.362346 |
| 17542072 | Mir471    | microRNA 471    | 2.098866 | 1.998891 | 2.007027 | 1.898013 | 2.11804  | 2.136383 |
| 17498158 | Mir483    | microRNA 483    | 37.34078 | 53.94772 | 44.77837 | 34.76443 | 35.48605 | 28.77931 |
| 17278858 | Mir485    | microRNA 485    | 2.688945 | 2.67402  | 2.810993 | 2.67402  | 2.732554 | 2.67402  |
| 17500060 | Mir486    | microRNA 486    | 11.70709 | 15.36281 | 16.43341 | 12.1962  | 13.27031 | 14.84412 |
| 17278846 | Mir487b   | microRNA 487b   | 3.062691 | 2.921339 | 2.688684 | 3.145894 | 3.897449 | 3.145894 |
| 17218541 | Mir488    | microRNA 488    | 2.614038 | 1.920457 | 2.060608 | 2.372256 | 2.397449 | 2.206867 |
| 17464571 | Mir489    | microRNA 489    | 2.406006 | 2.543015 | 2.304574 | 2.755015 | 2.8481   | 2.4713   |
| 17457318 | Mir490    | microRNA 490    | 2.160477 | 2.038418 | 2.116807 | 2.953407 | 2.481977 | 2.435402 |
| 17415290 | Mir491    | microRNA 491    | 2.771352 | 2.583846 | 2.596971 | 2.726311 | 2.477302 | 2.701798 |
| 17278690 | Mir493    | microRNA 493    | 2.997521 | 3.409287 | 2.536677 | 3.425869 | 3.072345 | 3.689589 |
| 17278820 | Mir494    | microRNA 494    | 4.635131 | 4.801649 | 4.264747 | 5.76324  | 4.801649 | 6.105926 |
| 17278830 | Mir495    | microRNA 495    | 2.125379 | 2.281148 | 2.083357 | 1.779707 | 2.169737 | 2.285991 |
| 17278880 | Mir496a   | microRNA 496a   | 3.070131 | 2.791151 | 3.009972 | 2.822728 | 2.443569 | 2.984564 |
| 17252009 | Mir497    | microRNA 497    | 5.379157 | 5.214721 | 4.210233 | 4.492411 | 4.658902 | 4.603624 |
| 17378438 | Mir499    | microRNA 499    | 2.481049 | 2.502934 | 3.618245 | 2.606909 | 2.481049 | 2.705453 |
| 17539818 | Mir500    | microRNA 500    | 3.062691 | 3.344661 | 2.896519 | 2.844391 | 2.479312 | 3.638465 |
| 17539820 | Mir501    | microRNA 501    | 3.136618 | 3.078889 | 3.822006 | 2.597475 | 2.586749 | 3.185147 |
| 17541946 | Mir504    | microRNA 504    | 2.360545 | 2.338024 | 2.717123 | 3.138576 | 2.396867 | 3.079572 |
| 17542021 | Mir505    | microRNA 505    | 98.36138 | 165.954  | 130.5845 | 147.6277 | 167.2845 | 143.0276 |
| 17542119 | Mir509    | microRNA 509    | 2.038164 | 2.038164 | 1.947158 | 2.295932 | 2.038164 | 2.038164 |
| 17438494 | Mir5098   | microRNA 5098   | 3.504771 | 8.075659 | 6.603496 | 5.428562 | 5.48933  | 9.68163  |
| 17275060 | Mir5099   | microRNA 5099   | 3250.171 | 3904.927 | 3389.813 | 3705.365 | 2979.408 | 3677.705 |
| 17250507 | Mir5100   | microRNA 5100   | 17.41852 | 13.3185  | 15.44063 | 17.13376 | 14.66322 | 17.44897 |
| 17222070 | Mir5103   | microRNA 5103   | 19.59427 | 14.66546 | 25.8634  | 17.09568 | 15.14018 | 21.31785 |
| 17231600 | Mir5104   | microRNA 5104   | 2.813274 | 2.536765 | 3.901043 | 3.135358 | 2.782767 | 3.754654 |
| 17424876 | Mir5106   | microRNA 5106   | 3.584247 | 3.274853 | 3.120182 | 3.120182 | 3.204946 | 3.192685 |
| 17233767 | Mir5108   | microRNA 5108   | 5.619688 | 5.303777 | 4.990658 | 4.815448 | 6.150271 | 5.48933  |
| 17367137 | Mir511    | microRNA 511    | 6.034859 | 8.142659 | 7.490749 | 7.993349 | 6.943389 | 10.58633 |
| 17267184 | Mir5110   | microRNA 5110   | 3.180426 | 3.040166 | 3.368649 | 2.918911 | 4.134549 | 2.918911 |
| 17352196 | Mir5112   | microRNA 5112   | 199.491  | 157.1088 | 192.0649 | 233.7561 | 171.1989 | 216.9442 |
| 17326239 | Mir5118   | microRNA 5118   | 3.841581 | 3.975841 | 5.211505 | 4.406124 | 7.586529 | 3.549756 |
| 17255947 | Mir5119   | microRNA 5119   | 3.260696 | 2.652477 | 3.362397 | 3.282944 | 2.618027 | 3.664306 |
| 17424902 | Mir5120   | microRNA 5120   | 11.53471 | 16.92472 | 15.34153 | 13.07111 | 18.79699 | 11.68163 |
| 17424088 | Mir5123   | microRNA 5123   | 28.15931 | 24.36114 | 33.92013 | 31.00158 | 24.19908 | 24.21367 |
| 17286717 | Mir5124a  | microRNA 5124a  | 8.068945 | 28.22184 | 18.27526 | 19.28972 | 13.45658 | 14.54983 |
| 17334147 | Mir5125   | microRNA 5125   | 41.62793 | 114.8455 | 121.0895 | 88.69925 | 90.19028 | 101.2277 |
| 17355728 | Mir5127   | microRNA 5127   | 5.441823 | 3.237836 | 2.760482 | 3.227574 | 3.001097 | 3.056202 |

|          |           |                 |          |          |          |          |          |          |
|----------|-----------|-----------------|----------|----------|----------|----------|----------|----------|
| 17384657 | Mir5128   | microRNA 5128   | 4.585757 | 4.58312  | 3.683175 | 4.265515 | 4.426695 | 3.909733 |
| 17527982 | Mir5133   | microRNA 5133   | 12.96913 | 16.59343 | 20.38082 | 21.10189 | 15.67442 | 16.68477 |
| 17282019 | Mir5135   | microRNA 5135   | 77.30555 | 111.5116 | 94.65652 | 102.3147 | 93.78011 | 104.0476 |
| 17539826 | Mir532    | microRNA 532    | 3.886631 | 3.883991 | 5.029029 | 4.157165 | 5.948599 | 4.157165 |
| 17278848 | Mir539    | microRNA 539    | 5.438882 | 7.200165 | 5.528201 | 6.566752 | 5.187826 | 4.361608 |
| 17278694 | Mir540    | microRNA 540    | 11.24366 | 10.69823 | 12.16285 | 10.29577 | 12.18361 | 10.6141  |
| 17278884 | Mir541    | microRNA 541    | 3.044953 | 2.976032 | 2.617846 | 3.17151  | 2.606023 | 2.372454 |
| 17541721 | Mir542    | microRNA 542    | 15.96201 | 12.50653 | 12.81063 | 15.04977 | 16.92143 | 16.0999  |
| 17278828 | Mir543    | microRNA 543    | 2.933575 | 3.365125 | 3.340676 | 3.254757 | 2.493773 | 3.28743  |
| 17278850 | Mir544    | microRNA 544    | 2.477474 | 1.501589 | 1.869432 | 2.083357 | 1.89302  | 2.164659 |
| 17542117 | Mir547    | microRNA 547    | 2.768875 | 2.814171 | 2.583828 | 2.41972  | 2.579784 | 2.23301  |
| 17396544 | Mir551b   | microRNA 551b   | 11.84634 | 10.72466 | 10.99138 | 12.35189 | 12.32803 | 13.76898 |
| 17325723 | Mir568    | microRNA 568    | 80.12497 | 112.6357 | 105.9963 | 99.3281  | 87.91516 | 77.23485 |
| 17437702 | Mir574    | microRNA 574    | 46.62268 | 67.44595 | 74.28968 | 74.77686 | 67.98808 | 81.89083 |
| 17289790 | Mir582    | microRNA 582    | 2.419233 | 2.124687 | 2.536712 | 2.278383 | 2.238031 | 2.425933 |
| 17465296 | Mir592    | microRNA 592    | 5.915746 | 6.287864 | 5.669769 | 6.52795  | 4.641529 | 6.411314 |
| 17301245 | Mir598    | microRNA 598    | 15.65238 | 13.74781 | 11.56746 | 17.4312  | 15.37101 | 15.37996 |
| 17316432 | Mir599    | microRNA 599    | 2.418798 | 1.930869 | 2.256098 | 2.636237 | 2.974341 | 2.761324 |
| 17315536 | Mir615    | microRNA 615    | 5.669769 | 6.213947 | 5.669769 | 5.463858 | 5.669769 | 5.927649 |
| 17538312 | Mir652    | microRNA 652    | 4.572712 | 4.831262 | 5.705487 | 4.909037 | 4.726755 | 4.854525 |
| 17464569 | Mir653    | microRNA 653    | 2.217709 | 2.021099 | 2.113245 | 1.916667 | 2.548538 | 2.072425 |
| 17278836 | Mir654    | microRNA 654    | 5.335857 | 5.780603 | 5.066116 | 4.300427 | 4.085266 | 4.20927  |
| 17278696 | Mir665    | microRNA 665    | 10.00133 | 18.893   | 30.83271 | 13.24458 | 10.91583 | 11.94512 |
| 17278826 | Mir666    | microRNA 666    | 14.85658 | 14.04418 | 11.27363 | 13.86937 | 9.21044  | 11.75791 |
| 17278832 | Mir667    | microRNA 667    | 5.725414 | 5.977864 | 6.886877 | 6.420519 | 7.284601 | 5.125988 |
| 17278856 | Mir668    | microRNA 668    | 5.635408 | 7.664279 | 7.346209 | 5.905176 | 6.030677 | 5.218915 |
| 17366754 | Mir669a-1 | microRNA 669a-1 | 3.300329 | 2.111576 | 1.992238 | 1.898013 | 2.147041 | 2.606909 |
| 17366766 | Mir669a-1 | microRNA 669a-1 | 3.300329 | 2.111576 | 1.992238 | 1.898013 | 2.147041 | 2.606909 |
| 17366776 | Mir669a-1 | microRNA 669a-1 | 3.300329 | 2.111576 | 1.992238 | 1.898013 | 2.147041 | 2.606909 |
| 17366786 | Mir669a-1 | microRNA 669a-1 | 3.300329 | 2.111576 | 1.992238 | 1.898013 | 2.147041 | 2.606909 |
| 17366798 | Mir669a-1 | microRNA 669a-1 | 3.300329 | 2.111576 | 1.992238 | 1.898013 | 2.147041 | 2.606909 |
| 17366822 | Mir669a-1 | microRNA 669a-1 | 3.300329 | 2.111576 | 1.992238 | 1.898013 | 2.147041 | 2.606909 |
| 17366834 | Mir669a-1 | microRNA 669a-1 | 3.300329 | 2.111576 | 1.992238 | 1.898013 | 2.147041 | 2.606909 |
| 17366858 | Mir669a-1 | microRNA 669a-1 | 3.300329 | 2.111576 | 1.992238 | 1.898013 | 2.147041 | 2.606909 |
| 17366870 | Mir669a-1 | microRNA 669a-1 | 3.300329 | 2.111576 | 1.992238 | 1.898013 | 2.147041 | 2.606909 |
| 17366882 | Mir669a-1 | microRNA 669a-1 | 3.300329 | 2.111576 | 1.992238 | 1.898013 | 2.147041 | 2.606909 |
| 17366920 | Mir669a-1 | microRNA 669a-1 | 3.300329 | 2.111576 | 1.992238 | 1.898013 | 2.147041 | 2.606909 |
| 17366908 | Mir669a-2 | microRNA 669a-2 | 3.300329 | 2.111576 | 1.992238 | 1.898013 | 2.147041 | 2.606909 |
| 17366744 | Mir669a-3 | microRNA 669a-3 | 11.45686 | 5.020601 | 6.629775 | 11.24787 | 6.109524 | 10.39999 |
| 17366724 | Mir669b   | microRNA 669b   | 2.472174 | 2.731437 | 2.762664 | 2.773543 | 2.670926 | 2.309227 |
| 17366902 | Mir669c   | microRNA 669c   | 3.767324 | 2.794655 | 4.336587 | 3.737983 | 3.488701 | 3.569742 |
| 17366728 | Mir669d   | microRNA 669d   | 2.793396 | 3.040672 | 3.489402 | 6.918935 | 3.729055 | 3.536789 |
| 17366722 | Mir669e   | microRNA 669e   | 2.543227 | 2.812202 | 2.595532 | 2.493825 | 2.998394 | 2.821769 |
| 17366720 | Mir669f   | microRNA 669f   | 20.09062 | 25.96921 | 31.51988 | 24.07544 | 28.93954 | 27.20123 |
| 17366756 | Mir669g   | microRNA 669g   | 2.049526 | 3.060697 | 2.459866 | 2.479656 | 2.493116 | 2.619461 |
| 17366944 | Mir669h   | microRNA 669h   | 5.624637 | 4.815882 | 2.429383 | 5.796733 | 4.536281 | 4.20927  |
| 17366942 | Mir669i   | microRNA 669i   | 2.162035 | 1.974312 | 2.074667 | 1.728703 | 1.816032 | 1.855541 |
| 17366760 | Mir669j   | microRNA 669j   | 2.772121 | 3.362374 | 2.835946 | 2.304206 | 1.92635  | 2.195075 |
| 17366746 | Mir669k   | microRNA 669k   | 2.406006 | 2.251271 | 2.617573 | 2.848219 | 2.363361 | 2.897824 |
| 17366732 | Mir669l   | microRNA 669l   | 3.324091 | 3.247366 | 2.91093  | 2.22308  | 3.009972 | 3.079914 |
| 17366922 | Mir669m-1 | microRNA 669m-1 | 8.272423 | 7.982552 | 9.622355 | 9.035785 | 16.20885 | 10.62006 |
| 17366924 | Mir669m-2 | microRNA 669m-2 | 3.449387 | 2.920368 | 3.509462 | 2.953407 | 2.970509 | 2.902045 |
| 17401999 | Mir669n   | microRNA 669n   | 1.982705 | 11.69135 | 18.88004 | 5.690952 | 3.341579 | 8.03039  |
| 17366928 | Mir669o   | microRNA 669o   | 2.850332 | 5.677123 | 8.896883 | 5.309183 | 9.842399 | 6.15876  |
| 17366810 | Mir669p-1 | microRNA 669p-1 | 3.067642 | 1.81275  | 1.85378  | 1.829133 | 1.941511 | 2.541693 |
| 17366846 | Mir669p-1 | microRNA 669p-1 | 3.067642 | 1.81275  | 1.85378  | 1.829133 | 1.941511 | 2.541693 |
| 17388594 | Mir670    | microRNA 670    | 4.360671 | 4.485752 | 4.042058 | 4.443018 | 4.084162 | 4.240017 |
| 17543850 | Mir672    | microRNA 672    | 5.541897 | 7.490905 | 7.060596 | 4.814046 | 6.171709 | 6.171709 |
| 17278688 | Mir673    | microRNA 673    | 37.89984 | 46.89525 | 51.57714 | 47.40344 | 49.94506 | 45.24825 |
| 17374468 | Mir674    | microRNA 674    | 21.22967 | 12.21879 | 10.66876 | 12.46473 | 11.83051 | 11.50086 |
| 17498126 | Mir675    | microRNA 675    | 11.25536 | 11.97264 | 12.52171 | 14.07917 | 31.82459 | 15.84384 |
| 17536515 | Mir676    | microRNA 676    | 2.715598 | 2.738432 | 3.312797 | 2.789758 | 2.552286 | 2.915958 |
| 17238293 | Mir677    | microRNA 677    | 3.285379 | 5.391923 | 5.635252 | 6.405406 | 6.529398 | 10.00702 |
| 17278822 | Mir679    | microRNA 679    | 3.935345 | 3.831077 | 3.615387 | 4.20927  | 3.966482 | 5.554665 |
| 17463577 | Mir680-1  | microRNA 680-1  | 4.550137 | 4.270485 | 10.08158 | 5.973059 | 3.112319 | 4.063661 |
| 17538354 | Mir680-2  | microRNA 680-2  | 185.2706 | 222.5306 | 194.9094 | 194.7798 | 217.3717 | 198.3342 |
| 17280727 | Mir680-3  | microRNA 680-3  | 9.337394 | 7.463022 | 9.462819 | 7.584899 | 9.645527 | 6.560065 |
| 17281635 | Mir681    | microRNA 681    | 3.033682 | 3.241923 | 3.448311 | 4.624348 | 3.81642  | 3.255886 |
| 17288695 | Mir682    | microRNA 682    | 210.1739 | 285.8432 | 340.5989 | 300.9291 | 436.295  | 381.606  |
| 17292527 | Mir683-1  | microRNA 683-1  | 12.83276 | 14.25593 | 16.84794 | 15.30966 | 15.68518 | 12.66671 |
| 17292529 | Mir683-1  | microRNA 683-1  | 12.83276 | 14.25593 | 16.84794 | 15.30966 | 15.68518 | 12.66671 |
| 17387353 | Mir684-1  | microRNA 684-1  | 14.31732 | 14.92263 | 14.92263 | 15.37101 | 14.92263 | 13.53985 |
| 17411749 | Mir684-2  | microRNA 684-2  | 10.54422 | 10.64755 | 9.799037 | 10.79723 | 10.48228 | 10.35948 |
| 17308598 | Mir687    | microRNA 687    | 2.611611 | 2.67402  | 2.67402  | 2.315943 | 3.441744 | 2.627517 |
| 17322287 | Mir688    | microRNA 688    | 6.236601 | 7.85777  | 7.519726 | 7.76879  | 8.698882 | 10.35101 |
| 17329525 | Mir690    | microRNA 690    | 1.9527   | 2.036808 | 2.232716 | 2.198485 | 2.883798 | 2.274485 |
| 17331516 | Mir691    | microRNA 691    | 3.396032 | 3.101293 | 3.235458 | 3.551405 | 3.14476  | 3.729055 |
| 17340629 | Mir692-1  | microRNA 692-1  | 1107.814 | 1247.946 | 1388.229 | 1202.574 | 1001.593 | 1121.279 |
| 17288650 | Mir692-3  | microRNA 692-3  | 2256.17  | 2433.184 | 2614.537 | 2351.018 | 2227.701 | 2204.751 |
| 17418483 | Mir692-3  | microRNA 692-3  | 2373.006 | 2634.439 | 2927.777 | 2567.663 | 2318.651 | 2356.533 |
| 17338041 | Mir693    | microRNA 693    | 3.27399  | 4.057525 | 4.094564 | 3.02843  | 5.120306 | 3.494655 |
| 17355131 | Mir694    | microRNA 694    | 6.45837  | 7.882919 | 5.912958 | 6.107661 | 6.412247 | 6.808939 |
| 17378346 | Mir695    | microRNA 695    | 2.953407 | 3.306947 | 3.080896 | 2.75532  | 3.206635 | 2.953407 |
| 17418304 | Mir697    | microRNA 697    | 4.079013 | 5.675471 | 3.12042  | 5.177444 | 6.293227 | 5.235945 |

|          |            |                                                                                |          |          |          |          |          |          |
|----------|------------|--------------------------------------------------------------------------------|----------|----------|----------|----------|----------|----------|
| 17440618 | Mir701     | microRNA 701                                                                   | 2.529408 | 2.343265 | 2.436956 | 2.423026 | 2.438696 | 2.261155 |
| 17449958 | Mir703     | microRNA 703                                                                   | 418.8036 | 486.2451 | 477.8387 | 453.5664 | 490.7961 | 518.2089 |
| 17480290 | Mir708     | microRNA 708                                                                   | 2.636018 | 2.420844 | 2.131132 | 2.606909 | 2.188921 | 2.285991 |
| 17503092 | Mir709     | microRNA 709                                                                   | 4.107128 | 2.263994 | 4.01603  | 3.990003 | 5.74788  | 3.719555 |
| 17293163 | Mir7-1     | microRNA 7-1                                                                   | 10.2778  | 9.826175 | 8.92177  | 9.884856 | 11.01517 | 17.48408 |
| 17509615 | Mir710     | microRNA 710                                                                   | 2.481049 | 2.375004 | 2.423782 | 2.527183 | 2.782767 | 2.430697 |
| 17288077 | Mir713     | microRNA 713                                                                   | 3.77255  | 4.818854 | 4.439816 | 5.409443 | 5.120306 | 6.134476 |
| 17541693 | Mir717     | microRNA 717                                                                   | 7.04339  | 6.367336 | 6.857962 | 8.51685  | 6.844665 | 8.226849 |
| 17479301 | Mir7-2     | microRNA 7-2                                                                   | 2.933392 | 3.879606 | 3.411225 | 4.934692 | 3.319647 | 3.041662 |
| 17453771 | Mir721     | microRNA 721                                                                   | 5.399254 | 5.662778 | 5.805821 | 5.770995 | 4.619863 | 5.28605  |
| 17542074 | Mir741     | microRNA 741                                                                   | 2.282461 | 2.089344 | 2.162575 | 1.909626 | 2.194512 | 1.975722 |
| 17542066 | Mir742     | microRNA 742                                                                   | 2.481049 | 2.246595 | 2.481049 | 2.383183 | 3.377978 | 2.513347 |
| 17542062 | Mir743     | microRNA 743                                                                   | 3.133858 | 3.425727 | 3.111521 | 3.772079 | 3.263862 | 3.688643 |
| 17542064 | Mir743b    | microRNA 743b                                                                  | 2.334834 | 2.641413 | 2.91802  | 2.263413 | 2.503923 | 2.193478 |
| 17264206 | Mir744     | microRNA 744                                                                   | 3.555543 | 4.130195 | 4.364057 | 3.68532  | 3.082455 | 3.755851 |
| 17278816 | Mir758     | microRNA 758                                                                   | 8.042589 | 9.716387 | 7.555724 | 9.417799 | 8.455675 | 6.237812 |
| 17302271 | Mir759     | microRNA 759                                                                   | 2.371122 | 2.588525 | 2.329919 | 2.601728 | 2.820381 | 2.070846 |
| 17409958 | Mir760     | microRNA 760                                                                   | 19.75999 | 21.60974 | 21.06929 | 20.33002 | 22.93883 | 22.30909 |
| 17416811 | Mir761     | microRNA 761                                                                   | 29.00641 | 48.6322  | 64.81968 | 35.04678 | 34.60287 | 37.41306 |
| 17245431 | Mir763     | microRNA 763                                                                   | 15.47706 | 14.46105 | 16.1446  | 16.92671 | 17.29364 | 19.32505 |
| 17538429 | Mir764     | microRNA 764                                                                   | 4.268059 | 3.705479 | 4.211926 | 4.762998 | 3.870393 | 4.353754 |
| 17542235 | Mir767     | microRNA 767                                                                   | 2.211308 | 2.406006 | 2.295789 | 2.805232 | 2.406006 | 2.836595 |
| 17338741 | Mir7b      | microRNA 7b                                                                    | 6.681398 | 6.867905 | 6.424081 | 6.171709 | 7.138149 | 6.97895  |
| 17327253 | Mir802     | microRNA 802                                                                   | 2.447027 | 2.367952 | 2.367952 | 2.367952 | 2.782767 | 2.422976 |
| 17262355 | Mir804     | microRNA 804                                                                   | 2.410229 | 3.09777  | 1.878733 | 2.134562 | 2.194132 | 2.53376  |
| 17542084 | Mir871     | microRNA 871                                                                   | 2.456169 | 2.20062  | 1.987383 | 2.293737 | 2.254426 | 2.274627 |
| 17415467 | Mir872     | microRNA 872                                                                   | 2.253738 | 2.39164  | 2.39164  | 2.27753  | 2.258884 | 2.339143 |
| 17423960 | Mir873a    | microRNA 873a                                                                  | 2.811344 | 2.495415 | 2.486248 | 2.232051 | 5.222824 | 2.725347 |
| 17293083 | Mir874     | microRNA 874                                                                   | 16.70028 | 15.79581 | 20.50097 | 21.92037 | 14.24388 | 16.01553 |
| 17316434 | Mir875     | microRNA 875                                                                   | 2.139569 | 1.799941 | 1.747945 | 2.111883 | 2.148232 | 2.111883 |
| 17423958 | Mir876     | microRNA 876                                                                   | 2.108724 | 2.060051 | 1.898013 | 1.994725 | 2.473099 | 2.084296 |
| 17344536 | Mir877     | microRNA 877                                                                   | 5.337781 | 5.040371 | 4.799586 | 5.979356 | 6.38745  | 6.497704 |
| 17542080 | Mir878     | microRNA 878                                                                   | 2.406006 | 2.845082 | 2.481995 | 2.350471 | 2.694075 | 2.70791  |
| 17434653 | Mir879     | microRNA 879                                                                   | 2.406006 | 2.332117 | 1.987631 | 2.0468   | 2.332117 | 2.332117 |
| 17542078 | Mir880     | microRNA 880                                                                   | 2.263602 | 2.132654 | 2.152943 | 2.132654 | 2.223635 | 2.139865 |
| 17542082 | Mir881     | microRNA 881                                                                   | 2.82042  | 1.819144 | 1.990361 | 2.169436 | 2.643703 | 2.502326 |
| 17278789 | Mir882     | microRNA 882                                                                   | 2.216956 | 2.165845 | 2.368609 | 2.344077 | 2.188921 | 2.098415 |
| 17542068 | Mir883a    | microRNA 883a                                                                  | 2.288354 | 2.343037 | 2.782053 | 2.652293 | 2.685052 | 2.207311 |
| 17542070 | Mir883b    | microRNA 883b                                                                  | 3.456951 | 2.97919  | 3.42929  | 4.01475  | 4.394412 | 4.425775 |
| 17399010 | Mir9-1     | microRNA 9-1                                                                   | 8.296886 | 6.696791 | 6.022615 | 6.540813 | 6.104191 | 6.28538  |
| 17288946 | Mir9-2     | microRNA 9-2                                                                   | 2.461333 | 2.34868  | 2.174404 | 2.214637 | 1.85333  | 2.214637 |
| 17541697 | Mir92-2    | microRNA 92-2                                                                  | 2.311036 | 2.961073 | 2.574781 | 2.785816 | 3.952156 | 3.017597 |
| 17406960 | Mir92b     | microRNA 92b                                                                   | 38.0921  | 46.07014 | 32.23129 | 46.61008 | 25.4293  | 34.31173 |
| 17454252 | Mir93      | microRNA 93                                                                    | 2.953407 | 2.953407 | 2.953407 | 2.953407 | 3.698525 | 3.625374 |
| 17479423 | Mir9-3     | microRNA 9-3                                                                   | 8.813225 | 8.498805 | 7.698994 | 6.919271 | 7.988474 | 6.798988 |
| 17465480 | Mir96      | microRNA 96                                                                    | 3.106521 | 3.351298 | 2.872885 | 2.934918 | 2.835297 | 4.072063 |
| 17538848 | Mir98      | microRNA 98                                                                    | 3.241878 | 5.024883 | 3.867711 | 2.839545 | 4.742343 | 3.345565 |
| 17326700 | Mir99a     | microRNA 99a                                                                   | 4.681043 | 4.899587 | 4.239488 | 4.462493 | 4.979221 | 4.450878 |
| 17333705 | Mir99b     | microRNA 99b                                                                   | 24.18583 | 31.1636  | 24.10666 | 25.40534 | 28.71634 | 25.57017 |
| 17292329 | Mirlet7a-1 | microRNA let7a-1                                                               | 12.80815 | 10.02382 | 9.315738 | 13.0616  | 15.14395 | 13.19482 |
| 17516410 | Mirlet7a-2 | microRNA let7a-2                                                               | 6.858438 | 5.313196 | 5.045824 | 5.335117 | 3.665907 | 3.784099 |
| 17313860 | Mirlet7b   | microRNA let7b                                                                 | 2.67402  | 3.423424 | 2.758225 | 2.844155 | 5.455873 | 3.188151 |
| 17326702 | Mirlet7c-1 | microRNA let7c-1                                                               | 5.396148 | 2.257944 | 2.930222 | 2.846324 | 3.074326 | 2.449165 |
| 17313858 | Mirlet7c-2 | microRNA let7c-2                                                               | 2.525554 | 4.762866 | 2.922615 | 3.353947 | 2.328821 | 2.841357 |
| 17292325 | Mirlet7d   | microRNA let7d                                                                 | 3.077524 | 3.732417 | 3.4988   | 4.723709 | 4.330999 | 4.059241 |
| 17333707 | Mirlet7e   | microRNA let7e                                                                 | 8.592512 | 4.999348 | 5.334304 | 8.618937 | 6.828175 | 6.332258 |
| 17292327 | Mirlet7f-1 | microRNA let7f-1                                                               | 2.23662  | 1.861493 | 4.217038 | 2.943209 | 3.132859 | 3.173599 |
| 17538846 | Mirlet7f-2 | microRNA let7f-2                                                               | 3.733762 | 2.178281 | 2.256005 | 2.843031 | 1.934177 | 2.123435 |
| 17521157 | Mirlet7g   | microRNA let7g                                                                 | 3.575859 | 3.817717 | 3.290507 | 3.790084 | 3.65259  | 4.587442 |
| 17245585 | Mirlet7i   | microRNA let7i                                                                 | 7.198468 | 5.29933  | 5.785333 | 6.171709 | 5.614899 | 6.190861 |
| 17491745 | Mir344f    | microRNA Mir344f                                                               | 6.017524 | 4.96998  | 5.617429 | 4.562359 | 2.778969 | 4.560336 |
| 17424762 | Msmg       | microseminoprotein, prostate associated                                        | 7.317141 | 6.639433 | 5.821052 | 8.006379 | 7.441843 | 9.040484 |
| 17463909 | Mgst1      | microsomal glutathione S-transferase 1                                         | 262.2702 | 304.2915 | 284.9253 | 308.8602 | 268.2176 | 285.4294 |
| 17397475 | Mgst2      | microsomal glutathione S-transferase 2                                         | 3.574496 | 4.818854 | 4.561569 | 5.767316 | 5.184159 | 6.150058 |
| 17229403 | Mgst3      | microsomal glutathione S-transferase 3                                         | 31.0504  | 45.57561 | 57.38374 | 35.73981 | 32.88118 | 49.11698 |
| 17410636 | Mttp       | microsomal triglyceride transfer protein                                       | 401.5261 | 370.0586 | 353.8294 | 351.2514 | 307.3162 | 323.7845 |
| 17321493 | Mcrs1      | microspherule protein 1                                                        | 11.96194 | 12.30267 | 15.013   | 12.36748 | 11.28692 | 14.65133 |
| 17232853 | Mical1     | microtubule associated monooxygenase, calponin and LIM domain containing 1     | 6.727917 | 8.320902 | 8.576209 | 7.027298 | 6.5986   | 9.310251 |
| 17481863 | Mical2     | microtubule associated monooxygenase, calponin and LIM domain containing 2     | 24.82772 | 20.69284 | 21.75326 | 18.88344 | 19.26152 | 13.76326 |
| 17470468 | Mical3     | microtubule associated monooxygenase, calponin and LIM domain containing 3     | 36.14439 | 31.04158 | 31.50939 | 31.25381 | 25.26993 | 23.69778 |
| 17312920 | Micall1    | microtubule associated monooxygenase, calponin and LIM domain containing -like | 27.90303 | 32.16612 | 28.84161 | 28.94977 | 31.89437 | 27.86148 |
| 17511211 | Mast1      | microtubule associated serine/threonine kinase 1                               | 7.93082  | 11.03841 | 8.467112 | 10.24395 | 5.549585 | 9.255879 |
| 17428600 | Mast2      | microtubule associated serine/threonine kinase 2                               | 41.39602 | 35.91713 | 42.10559 | 38.89439 | 38.89439 | 32.62306 |
| 17510166 | Mast3      | microtubule associated serine/threonine kinase 3                               | 23.76292 | 20.02069 | 29.62021 | 28.71296 | 34.98974 | 30.35453 |
| 17295817 | Mast4      | microtubule associated serine/threonine kinase family member 4                 | 9.57983  | 11.50086 | 12.53074 | 9.95858  | 10.46326 | 10.499   |
| 17382169 | Mastl      | microtubule associated serine/threonine kinase-like                            | 3.976971 | 4.106844 | 3.80873  | 4.991073 | 4.392493 | 4.392493 |
| 17444884 | Mtus2      | microtubule associated tumor suppressor candidate 2                            | 5.432589 | 4.806278 | 4.647678 | 4.762503 | 4.762503 | 5.284877 |
| 17346817 | Mtcl1      | microtubule crosslinking factor 1                                              | 9.012641 | 9.579166 | 9.234795 | 9.234795 | 8.263884 | 9.234795 |
| 17429689 | Macf1      | microtubule-actin crosslinking factor 1                                        | 85.45127 | 89.2704  | 93.90434 | 79.78524 | 76.07708 | 72.51764 |
| 17375244 | Map1a      | microtubule-associated protein 1 A                                             | 7.255575 | 6.570531 | 8.59418  | 7.794303 | 8.187653 | 8.206631 |
| 17378337 | Map1lc3a   | microtubule-associated protein 1 light chain 3 alpha                           | 29.65102 | 25.4554  | 32.27175 | 29.65102 | 26.49044 | 30.34443 |
| 17506306 | Map1lc3b   | microtubule-associated protein 1 light chain 3 beta                            | 194.8675 | 254.5632 | 310.9179 | 221.5134 | 233.9019 | 216.0693 |
| 17506888 | Map10      | microtubule-associated protein 10                                              | 3.417923 | 2.711705 | 3.15159  | 3.722831 | 3.953115 | 4.003301 |
| 17295482 | Map1b      | microtubule-associated protein 1B                                              | 10.36429 | 11.32014 | 10.96011 | 11.00777 | 9.035973 | 10.41665 |

|          |            |                                                                                 |          |          |          |          |          |          |
|----------|------------|---------------------------------------------------------------------------------|----------|----------|----------|----------|----------|----------|
| 17502075 | Map1s      | microtubule-associated protein 1S                                               | 40.96103 | 45.55413 | 45.62207 | 41.53081 | 32.34453 | 35.10635 |
| 17213770 | Map2       | microtubule-associated protein 2                                                | 6.287864 | 6.287864 | 6.039755 | 6.566752 | 5.713164 | 5.855125 |
| 17522253 | Map4       | microtubule-associated protein 4                                                | 47.34007 | 62.87872 | 72.37653 | 49.00544 | 66.31025 | 49.46753 |
| 17480515 | Map6       | microtubule-associated protein 6                                                | 5.630917 | 4.525634 | 4.539395 | 5.478155 | 3.349394 | 4.611512 |
| 17480525 | Map6       | microtubule-associated protein 6                                                | 4.019427 | 3.597513 | 3.482154 | 3.854089 | 4.392919 | 3.89178  |
| 17231925 | Map7       | microtubule-associated protein 7                                                | 62.35053 | 55.91409 | 54.68109 | 55.92107 | 51.61935 | 52.93757 |
| 17398460 | Map9       | microtubule-associated protein 9                                                | 4.144506 | 3.858018 | 3.430693 | 4.447917 | 4.352065 | 4.11856  |
| 17257197 | Mapt       | microtubule-associated protein tau                                              | 6.992896 | 7.470372 | 6.992896 | 7.677252 | 5.965777 | 7.081476 |
| 17377989 | Mapre1     | microtubule-associated protein, RP/EB family, member 1                          | 44.79761 | 43.88178 | 38.04408 | 29.75252 | 23.50588 | 35.17601 |
| 17348933 | Mapre2     | microtubule-associated protein, RP/EB family, member 2                          | 9.22635  | 9.732834 | 12.48635 | 9.732834 | 7.495527 | 10.23806 |
| 17435855 | Mapre3     | microtubule-associated protein, RP/EB family, member 3                          | 70.27891 | 72.21967 | 79.3721  | 77.64171 | 63.41358 | 67.36092 |
| 17533282 | Mid1ip1    | Mid1 interacting protein 1 (gastrulation specific G12-like (zebrafish))         | 30.73861 | 29.93165 | 40.16119 | 37.20385 | 44.17322 | 40.66991 |
| 17412418 | Mdn1       | midasin homolog (yeast)                                                         | 17.69856 | 19.48848 | 17.69856 | 18.11007 | 17.48457 | 14.79789 |
| 17388284 | Mdk        | midkine                                                                         | 6.141112 | 4.897108 | 5.297237 | 6.141112 | 5.292099 | 6.485285 |
| 17539700 | Mid1       | midline 1                                                                       | 8.715902 | 8.715902 | 10.66876 | 10.63848 | 7.144683 | 9.027584 |
| 17546762 | Mid1       | midline 1                                                                       | 45.63725 | 48.16122 | 56.22734 | 52.32687 | 45.83984 | 37.92428 |
| 17538171 | Mid2       | midline 2                                                                       | 25.82453 | 25.73054 | 33.49445 | 34.29865 | 25.24437 | 23.54355 |
| 17235211 | Midn       | midnolin                                                                        | 39.31751 | 70.82516 | 82.17001 | 69.64945 | 68.72723 | 61.56549 |
| 17271968 | Mif4gd     | MIF4G domain containing                                                         | 28.03778 | 32.12022 | 27.63395 | 29.14325 | 30.15886 | 33.38296 |
| 17268810 | Mien1      | migration and invasion enhancer 1                                               | 74.04395 | 74.55122 | 81.24404 | 81.68957 | 76.70294 | 90.14465 |
| 17432790 | Miip       | migration and invasion inhibitory protein                                       | 15.13734 | 14.6281  | 14.41071 | 14.06239 | 14.8287  | 15.73014 |
| 17492314 | Mfge8      | milk fat globule-EGF factor 8 protein                                           | 44.03656 | 48.84571 | 57.34994 | 38.32676 | 26.03427 | 25.48224 |
| 17348365 | Mib1       | mindbomb homolog 1 (Drosophila)                                                 | 101.84   | 96.04909 | 84.52932 | 88.39544 | 104.1342 | 94.33754 |
| 17433826 | Mib2       | mindbomb homolog 2 (Drosophila)                                                 | 22.01706 | 21.82183 | 22.01706 | 23.13347 | 22.99885 | 23.74711 |
| 17240840 | Mcm9       | minichromosome maintenance complex component 9                                  | 8.656657 | 7.504729 | 7.006627 | 6.102752 | 8.535289 | 7.28137  |
| 17381306 | Mcm10      | minichromosome maintenance deficient 10 (S. cerevisiae)                         | 17.48287 | 15.96698 | 15.54264 | 17.15432 | 12.43031 | 15.82003 |
| 17468798 | Mcm2       | minichromosome maintenance deficient 2 mitotin (S. cerevisiae)                  | 15.96798 | 20.73563 | 19.702   | 15.96798 | 13.77137 | 13.39423 |
| 17221633 | Mcm3       | minichromosome maintenance deficient 3 (S. cerevisiae)                          | 13.524   | 15.20643 | 13.55168 | 12.55143 | 12.99361 | 11.29858 |
| 17234519 | Mcm3ap     | minichromosome maintenance deficient 3 (S. cerevisiae) associated protein       | 18.75366 | 17.68568 | 16.17171 | 17.76936 | 17.67588 | 17.43035 |
| 17328432 | Mcm4       | minichromosome maintenance deficient 4 homolog (S. cerevisiae)                  | 9.531611 | 9.880198 | 14.2009  | 9.078035 | 8.064807 | 9.88424  |
| 17502583 | Mcm5       | minichromosome maintenance deficient 5, cell division cycle 46 (S. cerevisiae)  | 14.76009 | 10.73984 | 11.25481 | 10.17735 | 9.983876 | 9.73857  |
| 17226550 | Mcm6       | minichromosome maintenance deficient 6 (MIS5 homolog, S. pombe) (S. cerevisiae) | 17.8454  | 23.55171 | 17.69083 | 15.46173 | 11.57949 | 16.07604 |
| 17454226 | Mcm7       | minichromosome maintenance deficient 7 (S. cerevisiae)                          | 15.2678  | 19.29025 | 14.61492 | 14.45503 | 14.54085 | 15.01133 |
| 17376626 | Mcm8       | minichromosome maintenance deficient 8 (S. cerevisiae)                          | 6.41278  | 5.525596 | 5.726724 | 6.729177 | 5.305689 | 6.466701 |
| 17211066 | Mcmcd2     | minichromosome maintenance domain containing 2                                  | 3.692198 | 3.131774 | 3.131774 | 3.326996 | 3.064751 | 3.337759 |
| 17254835 | Mir142hg   | Mir142 host gene (non-protein coding) [Source:MGI Symbol;Acc:MGI:1925841]       | 3.621281 | 3.263862 | 2.991647 | 3.531179 | 3.658444 | 3.244711 |
| 17354784 | Mir143hg   | Mir143 and Mir145 host gene (non-protein coding)                                | 8.947905 | 7.931809 | 9.526591 | 8.51685  | 10.88085 | 9.514119 |
| 17302640 | Mir17hg    | Mir17 host gene (non-protein coding)                                            | 5.21982  | 5.128333 | 5.113354 | 5.895319 | 5.2123   | 5.128333 |
| 17302617 | Mir17hg    | Mir17 host gene (non-protein coding) [Source:MGI Symbol;Acc:MGI:1923207]        | 13.81123 | 17.23835 | 14.00248 | 14.23125 | 11.90141 | 16.84957 |
| 17302619 | Mir17hg    | Mir17 host gene (non-protein coding) [Source:MGI Symbol;Acc:MGI:1923207]        | 8.954979 | 10.54473 | 9.403123 | 7.060792 | 6.896192 | 8.534638 |
| 17326685 | Mir99ahg   | Mir99a and Mirlet7c-1 host gene (non-protein coding)                            | 7.921041 | 7.770675 | 5.927115 | 7.403359 | 7.109017 | 7.736065 |
| 17278860 | Mirg       | miRNA containing gene                                                           | 3.703322 | 4.0103   | 3.697987 | 4.257628 | 3.67229  | 3.703322 |
| 17252272 | Mis12      | MIS12 homolog (yeast)                                                           | 26.83307 | 21.69574 | 22.38561 | 15.13105 | 18.25247 | 18.78358 |
| 17281428 | Mis18bp1   | MIS18 binding protein 1                                                         | 3.275193 | 3.690893 | 3.85222  | 3.468039 | 3.766619 | 3.935399 |
| 17331987 | Mis18a     | MIS18 kinetochore protein homolog A (S. pombe)                                  | 12.85333 | 13.29655 | 11.2989  | 11.69589 | 10.95578 | 12.07064 |
| 17406846 | Msto1      | misato homolog 1 (Drosophila)                                                   | 20.75404 | 21.79855 | 22.62256 | 21.98839 | 19.43156 | 23.24309 |
| 17252113 | Mink1      | misshapen-like kinase 1 (zebrafish)                                             | 66.45796 | 89.68532 | 83.82682 | 78.11133 | 67.88213 | 78.97642 |
| 17455971 | Mios       | missing oocyte, meiosis regulator, homolog (Drosophila)                         | 17.35994 | 16.44481 | 18.81837 | 16.9703  | 19.77122 | 19.74027 |
| 17466861 | Mira       | mistral long non-coding RNA                                                     | 3.334568 | 3.949035 | 3.729055 | 3.729055 | 3.070173 | 5.59051  |
| 17222396 | Mitd1      | MIT, microtubule interacting and transport, domain containing 1                 | 23.5155  | 21.10554 | 20.07628 | 30.22771 | 17.68789 | 23.5155  |
| 17258272 | Mrps7      | mitochondrial ribosomal protein S7                                              | 79.76036 | 64.33402 | 62.78422 | 71.63238 | 59.46422 | 69.74317 |
| 17346001 | Mrps36-ps1 | mitochondrial ribosomal protein S36, pseudogene 1                               | 7.709514 | 8.824044 | 10.58655 | 7.186454 | 6.833051 | 11.02067 |
| 17405119 | Mgarp      | mitochondria localized glutamic acid rich protein                               | 3.482419 | 3.524039 | 3.339703 | 3.339703 | 3.69074  | 3.110594 |
| 17230725 | Marc1      | mitochondrial amidoxime reducing component 1                                    | 492.5888 | 482.8094 | 462.5835 | 483.8547 | 476.9684 | 509.257  |
| 17230735 | Marc2      | mitochondrial amidoxime reducing component 2                                    | 253.3749 | 331.3082 | 341.1187 | 354.0624 | 353.8809 | 360.3462 |
| 17376480 | Mavs       | mitochondrial antiviral signaling protein                                       | 243.7553 | 199.0932 | 211.35   | 216.39   | 210.9489 | 162.894  |
| 17458454 | Malsu1     | mitochondrial assembly of ribosomal large subunit 1                             | 37.16235 | 33.77936 | 33.77936 | 35.19381 | 33.77936 | 36.22265 |
| 17241013 | Mcu        | mitochondrial calcium uniporter                                                 | 95.26603 | 84.82926 | 69.46864 | 71.19283 | 70.00179 | 84.15459 |
| 17292139 | Mcur1      | mitochondrial calcium uniporter regulator 1                                     | 86.48092 | 77.29536 | 86.90396 | 89.63747 | 91.95652 | 96.13368 |
| 17233565 | Micu1      | mitochondrial calcium uptake 1                                                  | 51.9683  | 45.99611 | 45.54087 | 40.27102 | 37.27742 | 34.39412 |
| 17307231 | Micu2      | mitochondrial calcium uptake 2                                                  | 75.85067 | 77.47828 | 65.06095 | 61.74498 | 69.748   | 63.90469 |
| 17500644 | Micu3      | mitochondrial calcium uptake family, member 3                                   | 6.358648 | 5.527319 | 5.668276 | 5.955819 | 5.232644 | 3.871547 |
| 17343035 | Mtch1      | mitochondrial carrier homolog 1 (C. elegans)                                    | 87.38659 | 84.69471 | 86.54749 | 81.02471 | 84.69471 | 85.30628 |
| 17373086 | Mtch2      | mitochondrial carrier homolog 2 (C. elegans)                                    | 516.3266 | 488.9896 | 470.79   | 446.851  | 353.3343 | 453.004  |
| 17313091 | Mief1      | mitochondrial elongation factor 1                                               | 27.55286 | 20.89564 | 24.98482 | 24.35726 | 24.23533 | 22.13749 |
| 17250500 | Mief2      | mitochondrial elongation factor 2                                               | 20.85122 | 20.08574 | 17.1967  | 22.86422 | 13.54314 | 16.17563 |
| 17214825 | Mff        | mitochondrial fission factor                                                    | 67.79138 | 57.63008 | 59.74268 | 53.80469 | 58.3528  | 55.45478 |
| 17259929 | Mtftp1     | mitochondrial fission process 1                                                 | 43.66847 | 34.19824 | 35.01497 | 45.57434 | 36.28396 | 37.05664 |
| 17396205 | Mtfr1      | mitochondrial fission regulator 1                                               | 55.12023 | 54.18494 | 53.14198 | 53.9051  | 52.03931 | 56.67066 |
| 17431302 | Mtfr1l     | mitochondrial fission regulator 1-like                                          | 64.32555 | 54.99239 | 59.98251 | 57.08343 | 54.69132 | 53.82856 |
| 17231963 | Mtfr2      | mitochondrial fission regulator 2                                               | 3.929975 | 4.293488 | 4.526732 | 4.41453  | 4.136126 | 4.152413 |
| 17377028 | Mgme1      | mitochondrial genome maintenance exonuclease 1                                  | 15.17937 | 16.23595 | 16.23595 | 18.73845 | 11.56449 | 16.23595 |
| 17484494 | Mtg1       | mitochondrial GTPase 1 homolog (S. cerevisiae)                                  | 26.22771 | 27.16374 | 28.54864 | 27.9968  | 32.06217 | 32.77787 |
| 17431867 | Minos1     | mitochondrial inner membrane organizing system 1                                | 19.87455 | 20.9788  | 19.69271 | 18.39383 | 17.24708 | 17.8823  |
| 17301061 | Mipep      | mitochondrial intermediate peptidase                                            | 42.49879 | 39.8799  | 47.75533 | 44.22806 | 36.33631 | 44.81501 |
| 17307428 | Mipepos    | mitochondrial intermediate peptidase, opposite strand                           | 5.510717 | 4.640403 | 4.064619 | 4.440586 | 4.060761 | 4.503479 |
| 17518573 | Mtfmt      | mitochondrial methionyl-tRNA formyltransferase                                  | 37.06023 | 40.66794 | 35.57742 | 34.78709 | 25.9079  | 31.3295  |
| 17348126 | Mtpap      | mitochondrial poly(A) polymerase                                                | 49.90249 | 40.93265 | 40.1662  | 46.87543 | 47.56043 | 49.2793  |
| 17284037 | Mpc1       | mitochondrial pyruvate carrier 1                                                | 893.2623 | 1000.496 | 981.5514 | 864.5766 | 893.1942 | 1008.853 |
| 17333079 | Mpc1       | mitochondrial pyruvate carrier 1                                                | 32.30644 | 33.91661 | 34.37577 | 33.79973 | 35.47867 | 37.56117 |
| 17218955 | Mpc2       | mitochondrial pyruvate carrier 2                                                | 95.18221 | 85.17511 | 82.97932 | 82.91263 | 79.56765 | 88.14092 |
| 17439374 | Mrpl1      | mitochondrial ribosomal protein L1                                              | 41.82837 | 47.57099 | 35.157   | 41.30917 | 40.10388 | 42.31009 |
| 17255719 | Mrpl10     | mitochondrial ribosomal protein L10                                             | 77.77853 | 80.17441 | 81.18211 | 74.97616 | 83.7252  | 81.06459 |
| 17356314 | Mrpl11     | mitochondrial ribosomal protein L11                                             | 33.67929 | 44.82774 | 41.37049 | 42.48819 | 33.94954 | 47.26794 |

|          |         |                                                                |          |          |          |          |          |          |
|----------|---------|----------------------------------------------------------------|----------|----------|----------|----------|----------|----------|
| 17259374 | Mrpl12  | mitochondrial ribosomal protein L12                            | 60.85694 | 60.95531 | 60.52671 | 58.82836 | 54.02855 | 68.064   |
| 17317144 | Mrpl13  | mitochondrial ribosomal protein L13                            | 51.61112 | 52.80124 | 53.68511 | 55.16266 | 51.93265 | 57.55902 |
| 17337955 | Mrpl14  | mitochondrial ribosomal protein L14                            | 34.07142 | 30.96121 | 29.03659 | 32.00532 | 29.10268 | 33.73022 |
| 17221081 | Mrpl15  | mitochondrial ribosomal protein L15                            | 73.79494 | 82.88218 | 82.88218 | 83.76583 | 69.77847 | 87.03538 |
| 17357741 | Mrpl16  | mitochondrial ribosomal protein L16                            | 68.64202 | 60.90547 | 63.22968 | 72.25222 | 61.17244 | 69.33058 |
| 17494637 | Mrpl17  | mitochondrial ribosomal protein L17                            | 55.67432 | 69.19999 | 70.69028 | 72.96891 | 77.82005 | 66.99864 |
| 17340943 | Mrpl18  | mitochondrial ribosomal protein L18                            | 66.74001 | 69.68518 | 71.10455 | 63.36086 | 66.42065 | 66.16012 |
| 17467996 | Mrpl19  | mitochondrial ribosomal protein L19                            | 21.46196 | 22.59341 | 29.16103 | 25.28938 | 31.66221 | 23.11552 |
| 17338124 | Mrpl2   | mitochondrial ribosomal protein L2                             | 34.70592 | 33.29792 | 34.70592 | 37.27974 | 32.82243 | 33.07456 |
| 17422697 | Mrpl20  | mitochondrial ribosomal protein L20                            | 25.88672 | 27.85491 | 23.71273 | 35.94776 | 33.41885 | 28.96121 |
| 17355903 | Mrpl21  | mitochondrial ribosomal protein L21                            | 28.04672 | 27.29207 | 27.60045 | 27.98167 | 30.48273 | 26.78067 |
| 17249965 | Mrpl22  | mitochondrial ribosomal protein L22                            | 16.36612 | 17.14457 | 16.36612 | 17.44885 | 17.93306 | 19.00109 |
| 17485258 | Mrpl23  | mitochondrial ribosomal protein L23                            | 34.98368 | 41.68366 | 34.64463 | 33.93871 | 33.97661 | 39.775   |
| 17398873 | Mrpl24  | mitochondrial ribosomal protein L24                            | 181.7045 | 167.1489 | 187.3121 | 213.439  | 193.6302 | 186.0234 |
| 17255243 | Mrpl27  | mitochondrial ribosomal protein L27                            | 4.630988 | 5.866622 | 4.872222 | 5.438241 | 5.971527 | 7.310196 |
| 17334861 | Mrpl28  | mitochondrial ribosomal protein L28                            | 28.81104 | 22.2065  | 29.08372 | 26.6956  | 29.80123 | 27.86129 |
| 17521070 | Mrpl3   | mitochondrial ribosomal protein L3                             | 47.64457 | 43.68209 | 37.15205 | 44.75044 | 51.82334 | 52.45033 |
| 17211998 | Mrpl30  | mitochondrial ribosomal protein L30                            | 20.3619  | 20.04749 | 22.70062 | 23.03539 | 18.13934 | 27.09547 |
| 17290770 | Mrpl32  | mitochondrial ribosomal protein L32                            | 20.94697 | 17.38017 | 20.79767 | 20.94697 | 19.47485 | 14.37958 |
| 17464843 | Gm6578  | mitochondrial ribosomal protein L32 pseudogene                 | 3.062691 | 2.809357 | 2.849937 | 2.67402  | 2.960457 | 2.67402  |
| 17436192 | Mrpl33  | mitochondrial ribosomal protein L33                            | 9.208078 | 8.102235 | 9.064579 | 8.539905 | 9.409513 | 10.59873 |
| 17502191 | Mrpl34  | mitochondrial ribosomal protein L34                            | 64.07146 | 65.94859 | 61.46188 | 60.2279  | 52.53802 | 63.80776 |
| 17467656 | Mrpl35  | mitochondrial ribosomal protein L35                            | 72.16113 | 72.94666 | 66.22344 | 69.73688 | 72.16113 | 72.16113 |
| 17288463 | Mrpl36  | mitochondrial ribosomal protein L36                            | 16.4382  | 17.33385 | 17.59093 | 18.97213 | 21.40269 | 18.09752 |
| 17427891 | Mrpl37  | mitochondrial ribosomal protein L37                            | 58.85161 | 61.3861  | 50.38876 | 57.36584 | 55.69323 | 55.59757 |
| 17272186 | Mrpl38  | mitochondrial ribosomal protein L38                            | 106.8283 | 106.0169 | 105.189  | 104.4226 | 78.69445 | 93.40255 |
| 17331642 | Mrpl39  | mitochondrial ribosomal protein L39                            | 139.3182 | 142.9999 | 112.8967 | 138.8651 | 127.8989 | 140.3923 |
| 17515062 | Mrpl4   | mitochondrial ribosomal protein L4                             | 33.30646 | 29.68866 | 37.14793 | 34.82859 | 28.58824 | 34.70376 |
| 17329001 | Mrpl40  | mitochondrial ribosomal protein L40                            | 61.20298 | 67.29465 | 66.84186 | 73.27911 | 68.91948 | 78.36133 |
| 17384811 | Gm16523 | mitochondrial ribosomal protein L40 pseudogene                 | 2.779933 | 3.603228 | 3.603977 | 3.515354 | 3.840569 | 2.848831 |
| 17382350 | Mrpl41  | mitochondrial ribosomal protein L41                            | 25.98937 | 28.16204 | 25.0853  | 30.80964 | 34.26206 | 27.90013 |
| 17244506 | Mrpl42  | mitochondrial ribosomal protein L42                            | 40.64793 | 51.00476 | 55.18445 | 56.6412  | 54.54859 | 63.1631  |
| 17365160 | Mrpl43  | mitochondrial ribosomal protein L43                            | 42.96292 | 41.14257 | 39.09657 | 38.16901 | 38.55323 | 37.49016 |
| 17214722 | Mrpl44  | mitochondrial ribosomal protein L44                            | 33.41444 | 33.07548 | 31.88398 | 32.18932 | 28.88283 | 31.09455 |
| 17255762 | Mrpl45  | mitochondrial ribosomal protein L45                            | 36.97197 | 39.09331 | 39.24481 | 38.78213 | 38.671   | 40.39626 |
| 17492280 | Mrpl46  | mitochondrial ribosomal protein L46                            | 23.96322 | 16.24642 | 15.89245 | 19.32572 | 10.95692 | 22.75923 |
| 17404616 | Mrpl47  | mitochondrial ribosomal protein L47                            | 14.14892 | 12.55169 | 16.23595 | 16.18012 | 15.53413 | 16.594   |
| 17548266 | Mrpl47  | mitochondrial ribosomal protein L47                            | 6.33498  | 4.706583 | 4.229596 | 3.751974 | 4.082662 | 4.695862 |
| 17493786 | Mrpl48  | mitochondrial ribosomal protein L48                            | 19.42873 | 14.89958 | 15.11375 | 13.30144 | 16.98195 | 15.40365 |
| 17361915 | Mrpl49  | mitochondrial ribosomal protein L49                            | 47.48763 | 37.16622 | 37.20256 | 42.59818 | 41.84954 | 36.83486 |
| 17425228 | Mrpl50  | mitochondrial ribosomal protein L50                            | 132.3707 | 113.9558 | 86.92504 | 103.065  | 117.3708 | 104.14   |
| 17463140 | Mrpl51  | mitochondrial ribosomal protein L51                            | 19.96097 | 21.5214  | 19.96097 | 18.76757 | 20.29764 | 23.27114 |
| 17300273 | Mrpl52  | mitochondrial ribosomal protein L52                            | 105.2233 | 115.775  | 115.775  | 114.1985 | 119.1876 | 127.1291 |
| 17459947 | Mrpl53  | mitochondrial ribosomal protein L53                            | 107.3531 | 80.09387 | 82.1404  | 104.9894 | 81.87834 | 96.94066 |
| 17300944 | Mrpl57  | mitochondrial ribosomal protein L53                            | 17.84094 | 15.73331 | 15.56431 | 14.6741  | 11.84019 | 14.38287 |
| 17243247 | Mrpl54  | mitochondrial ribosomal protein L54                            | 47.77686 | 50.08477 | 53.82782 | 53.82782 | 53.82782 | 52.23989 |
| 17250197 | Mrpl55  | mitochondrial ribosomal protein L55                            | 71.00309 | 61.25306 | 68.75582 | 71.04839 | 62.06121 | 63.06554 |
| 17400091 | Mrpl9   | mitochondrial ribosomal protein L9                             | 37.40321 | 33.86305 | 36.30081 | 39.43815 | 36.91589 | 44.56502 |
| 17338233 | Mrps10  | mitochondrial ribosomal protein S10                            | 39.58577 | 39.35023 | 37.38299 | 40.06082 | 40.30006 | 43.11626 |
| 17479291 | Mrps11  | mitochondrial ribosomal protein S11                            | 48.62647 | 48.05751 | 48.51234 | 43.04519 | 49.53204 | 43.42759 |
| 17488535 | Mrps12  | mitochondrial ribosomal protein S12                            | 63.96097 | 67.29465 | 69.37577 | 67.29465 | 68.67961 | 72.66607 |
| 17218607 | Mrps14  | mitochondrial ribosomal protein S14                            | 5.506593 | 8.73683  | 7.933734 | 4.688284 | 4.955876 | 8.423676 |
| 17418507 | Mrps15  | mitochondrial ribosomal protein S15                            | 92.09749 | 113.4726 | 111.334  | 122.2415 | 116.9015 | 121.3946 |
| 17303765 | Mrps16  | mitochondrial ribosomal protein S16                            | 53.60702 | 45.62776 | 37.34958 | 46.71358 | 38.52999 | 59.76132 |
| 17442898 | Mrps17  | mitochondrial ribosomal protein S17                            | 51.23543 | 43.96123 | 50.37654 | 44.6386  | 48.20397 | 52.68572 |
| 17337974 | Mrps18a | mitochondrial ribosomal protein S18A                           | 44.12762 | 48.97692 | 39.03266 | 45.95755 | 37.1858  | 42.40287 |
| 17344497 | Mrps18b | mitochondrial ribosomal protein S18B                           | 56.59136 | 58.52414 | 57.71122 | 54.40925 | 54.96    | 58.24047 |
| 17329149 | Gm15760 | mitochondrial ribosomal protein S18B pseudogene                | 6.910547 | 6.383732 | 6.539725 | 4.746684 | 6.100764 | 7.04974  |
| 17439609 | Mrps18c | mitochondrial ribosomal protein S18C                           | 4.70593  | 4.410157 | 4.507852 | 4.018926 | 4.268414 | 4.203555 |
| 17368666 | Mrps2   | mitochondrial ribosomal protein S2                             | 27.34831 | 31.43871 | 27.87249 | 30.04452 | 25.22776 | 20.58212 |
| 17407926 | Mrps21  | mitochondrial ribosomal protein S21                            | 22.77233 | 26.79534 | 26.50073 | 29.22194 | 20.61997 | 20.11988 |
| 17529966 | Mrps22  | mitochondrial ribosomal protein S22                            | 44.53569 | 45.2994  | 40.15506 | 38.9254  | 36.72626 | 35.70465 |
| 17254962 | Mrps23  | mitochondrial ribosomal protein S23                            | 35.04338 | 30.56799 | 34.86143 | 36.7031  | 32.49464 | 35.3596  |
| 17260177 | Mrps24  | mitochondrial ribosomal protein S24                            | 71.89502 | 71.37466 | 69.71755 | 71.69646 | 69.3676  | 84.421   |
| 17469089 | Mrps25  | mitochondrial ribosomal protein S25                            | 23.2734  | 25.66837 | 24.3188  | 29.6463  | 23.67512 | 34.3853  |
| 17376365 | Mrps26  | mitochondrial ribosomal protein S26                            | 44.09124 | 44.64851 | 36.60528 | 49.40825 | 50.04555 | 47.82954 |
| 17289439 | Mrps27  | mitochondrial ribosomal protein S27                            | 29.87942 | 28.87042 | 29.20554 | 28.98069 | 31.28003 | 28.87042 |
| 17404021 | Mrps28  | mitochondrial ribosomal protein S28                            | 44.91016 | 41.36963 | 29.97068 | 39.004   | 38.01403 | 41.51469 |
| 17296476 | Mrps30  | mitochondrial ribosomal protein S30                            | 34.72614 | 39.32051 | 33.49445 | 35.48531 | 32.2561  | 38.69942 |
| 17499922 | Mrps31  | mitochondrial ribosomal protein S31                            | 92.27066 | 75.33978 | 77.58146 | 81.32179 | 88.83831 | 90.95052 |
| 17466195 | Mrps33  | mitochondrial ribosomal protein S33                            | 38.33526 | 44.43948 | 46.43884 | 43.44897 | 46.43884 | 49.28682 |
| 17334449 | Mrps34  | mitochondrial ribosomal protein S34                            | 60.16114 | 49.0639  | 60.16114 | 57.00948 | 63.17623 | 60.36708 |
| 17464404 | Mrps35  | mitochondrial ribosomal protein S35                            | 38.95563 | 36.81444 | 39.07435 | 43.15931 | 41.0944  | 49.30971 |
| 17295735 | Mrps36  | mitochondrial ribosomal protein S36                            | 3.557787 | 3.186406 | 4.044048 | 4.907302 | 4.527517 | 3.920561 |
| 17375911 | Mrps5   | mitochondrial ribosomal protein S5                             | 73.81336 | 78.16116 | 78.16116 | 82.22755 | 71.35982 | 80.50966 |
| 17212318 | Mrps9   | mitochondrial ribosomal protein S9                             | 47.1351  | 44.83862 | 50.02024 | 45.95309 | 52.06096 | 54.99162 |
| 17380694 | Mtg2    | mitochondrial ribosome associated GTPase 2                     | 23.36942 | 18.97213 | 20.5884  | 23.04529 | 20.91941 | 28.9263  |
| 17370285 | Mrrf    | mitochondrial ribosome recycling factor                        | 65.69128 | 54.89033 | 47.98096 | 51.15559 | 46.05609 | 49.86861 |
| 17267057 | Mrm1    | mitochondrial rRNA methyltransferase 1 homolog (S. cerevisiae) | 6.340515 | 6.21412  | 6.429827 | 8.414339 | 6.238936 | 7.385779 |
| 17419332 | Mecr    | mitochondrial trans-2-enoyl-CoA reductase                      | 16.23595 | 16.23595 | 15.92366 | 17.74241 | 14.06805 | 16.23595 |
| 17445303 | Mterf1a | mitochondrial transcription termination factor 1a              | 3.157363 | 3.607026 | 2.670204 | 3.182587 | 4.619991 | 2.95736  |
| 17434467 | Mterf1b | mitochondrial transcription termination factor 1b              | 1.911864 | 2.184147 | 2.045509 | 2.357929 | 2.391524 | 3.248469 |
| 17243638 | Mterf2  | mitochondrial transcription termination factor 2               | 6.992896 | 7.698994 | 7.588843 | 10.37321 | 7.698994 | 8.865549 |
| 17293870 | Mterf3  | mitochondrial transcription termination factor 3               | 19.54219 | 22.31049 | 13.85102 | 19.62866 | 19.62866 | 19.42402 |

|          |           |                                                                               |          |          |          |          |          |          |
|----------|-----------|-------------------------------------------------------------------------------|----------|----------|----------|----------|----------|----------|
| 17225693 | Mterf4    | mitochondrial transcription termination factor 4                              | 17.50518 | 23.30472 | 23.2497  | 23.46323 | 23.6853  | 23.09758 |
| 17519718 | Mto1      | mitochondrial translation optimization 1 homolog (S. cerevisiae)              | 28.81404 | 29.98585 | 29.16103 | 29.98585 | 25.26626 | 29.98585 |
| 17248064 | Mtif2     | mitochondrial translational initiation factor 2                               | 44.59716 | 44.81873 | 44.31521 | 45.00957 | 47.02317 | 44.16097 |
| 17455274 | Mtif3     | mitochondrial translational initiation factor 3                               | 32.90101 | 26.82209 | 26.79682 | 29.65226 | 33.37093 | 35.75666 |
| 17302213 | Mtrf1     | mitochondrial translational release factor 1                                  | 11.50006 | 11.44083 | 13.3404  | 14.34027 | 12.45256 | 12.65381 |
| 17238984 | Mtrf1l    | mitochondrial translational release factor 1-like                             | 18.3429  | 19.13391 | 17.75311 | 16.71545 | 17.77121 | 17.75311 |
| 17508907 | Mtus1     | mitochondrial tumor suppressor 1                                              | 113.0541 | 118.968  | 102.9243 | 103.258  | 100.2814 | 96.69437 |
| 17420505 | Mul1      | mitochondrial ubiquitin ligase activator of NFKB 1                            | 36.6853  | 40.24451 | 36.43846 | 39.33359 | 44.3484  | 41.37852 |
| 17532595 | mt-Rnr1   | mitochondrially encoded 12S rRNA [Source:MGI Symbol;Acc:MGI:102493]           | 6558.59  | 6791.337 | 6557.817 | 6775.116 | 6487.109 | 6983.139 |
| 17532599 | mt-Rnr2   | mitochondrially encoded 16S rRNA [Source:MGI Symbol;Acc:MGI:102492]           | 5274.286 | 5196.015 | 5012.588 | 5411.077 | 5272.275 | 5608.503 |
| 17532639 | mt-Ta     | mitochondrially encoded tRNA alanine [Source:MGI Symbol;Acc:MGI:102491]       | 279.4139 | 310.0635 | 546.1071 | 378.1514 | 372.6946 | 387.2281 |
| 17532623 | mt-Tr     | mitochondrially encoded tRNA arginine [Source:MGI Symbol;Acc:MGI:102476]      | 696.1768 | 532.1614 | 699.1654 | 816.6816 | 615.6088 | 765.2939 |
| 17532641 | mt-Tn     | mitochondrially encoded tRNA asparagine [Source:MGI Symbol;Acc:MGI:102479]    | 2046.368 | 1674.599 | 1850.385 | 1946.059 | 1980.309 | 2123.252 |
| 17532643 | mt-Tc     | mitochondrially encoded tRNA cysteine [Source:MGI Symbol;Acc:MGI:102490]      | 58.87732 | 120.2998 | 268.2325 | 123.0866 | 110.6447 | 105.8076 |
| 17532651 | mt-Te     | mitochondrially encoded tRNA glutamic acid [Source:MGI Symbol;Acc:MGI:102488] | 3364.345 | 3990.296 | 4618.856 | 3635.908 | 3630.066 | 3672.177 |
| 17532637 | mt-Tq     | mitochondrially encoded tRNA glutamine [Source:MGI Symbol;Acc:MGI:102477]     | 409.2816 | 363.2226 | 466.8709 | 416.1904 | 355.9523 | 353.3319 |
| 17532619 | mt-Tg     | mitochondrially encoded tRNA glycine [Source:MGI Symbol;Acc:MGI:102486]       | 1798.814 | 1779.949 | 1740.987 | 1928.79  | 1651.109 | 1921.57  |
| 17532627 | mt-Th     | mitochondrially encoded tRNA histidine [Source:MGI Symbol;Acc:MGI:102485]     | 1246.062 | 1200.059 | 1715.71  | 1602.402 | 1350.624 | 1583.938 |
| 17532601 | mt-Tl1    | mitochondrially encoded tRNA leucine 1 [Source:MGI Symbol;Acc:MGI:102482]     | 5325.421 | 5085.31  | 4879.61  | 5253.124 | 4807.796 | 4601.281 |
| 17532615 | mt-Tk     | mitochondrially encoded tRNA lysine [Source:MGI Symbol;Acc:MGI:102483]        | 373.372  | 551.0273 | 1029.801 | 757.0422 | 588.7576 | 738.109  |
| 17532605 | mt-Tm     | mitochondrially encoded tRNA methionine [Source:MGI Symbol;Acc:MGI:102480]    | 363.6307 | 492.6059 | 755.166  | 489.3626 | 410.0568 | 430.2556 |
| 17532593 | mt-Tf     | mitochondrially encoded tRNA phenylalanine [Source:MGI Symbol;Acc:MGI:102487] | 572.5667 | 724.3936 | 841.4245 | 664.387  | 354.1238 | 449.4011 |
| 17532653 | mt-Tp     | mitochondrially encoded tRNA proline [Source:MGI Symbol;Acc:MGI:102478]       | 24.3156  | 49.20183 | 93.54055 | 44.11997 | 58.80105 | 53.04997 |
| 17532647 | mt-Ts1    | mitochondrially encoded tRNA serine 1 [Source:MGI Symbol;Acc:MGI:102475]      | 61.82892 | 116.4454 | 240.773  | 112.9946 | 129.3064 | 141.3355 |
| 17532629 | mt-Ts2    | mitochondrially encoded tRNA serine 2 [Source:MGI Symbol;Acc:MGI:102474]      | 72.06516 | 175.1613 | 481.139  | 192.8814 | 200.6003 | 216.0603 |
| 17532635 | mt-Tt     | mitochondrially encoded tRNA threonine [Source:MGI Symbol;Acc:MGI:102473]     | 41.16939 | 81.84713 | 175.6512 | 89.16094 | 78.5726  | 100.2161 |
| 17532645 | mt-Ty     | mitochondrially encoded tRNA tyrosine [Source:MGI Symbol;Acc:MGI:102470]      | 80.98147 | 275.5079 | 619.4912 | 238.3239 | 208.5891 | 194.7258 |
| 17532597 | mt-Tv     | mitochondrially encoded tRNA valine [Source:MGI Symbol;Acc:MGI:102472]        | 3794.042 | 3854.372 | 3743.936 | 4100.545 | 3723.258 | 4076.372 |
| 17396710 | Mfn1      | mitofusin 1                                                                   | 119.3058 | 112.1628 | 96.00449 | 107.7863 | 113.3099 | 97.95587 |
| 17432808 | Mfn2      | mitofusin 2                                                                   | 105.0797 | 124.7002 | 132.3267 | 134.5007 | 86.89372 | 119.4713 |
| 17323371 | Mapk1     | mitogen-activated protein kinase 1                                            | 160.628  | 127.3301 | 119.2495 | 131.772  | 120.1481 | 148.5413 |
| 17497414 | Mapk1ip1  | mitogen-activated protein kinase 1 interacting protein 1                      | 17.26897 | 16.10984 | 20.03083 | 19.00148 | 22.29132 | 18.62967 |
| 17299323 | Mapk1ip1l | mitogen-activated protein kinase 1 interacting protein 1-like                 | 205.8172 | 210.9606 | 243.8534 | 185.1627 | 181.1336 | 168.2532 |
| 17450283 | Mapk10    | mitogen-activated protein kinase 10                                           | 4.760259 | 5.451526 | 5.702996 | 6.37533  | 4.31826  | 4.898296 |
| 17320322 | Mapk11    | mitogen-activated protein kinase 11                                           | 8.268926 | 8.838674 | 8.822271 | 6.497749 | 10.42532 | 8.604313 |
| 17320307 | Mapk12    | mitogen-activated protein kinase 12                                           | 13.46255 | 13.65001 | 16.04398 | 12.36937 | 12.45411 | 11.04017 |
| 17335383 | Mapk13    | mitogen-activated protein kinase 13                                           | 4.208132 | 6.294318 | 6.240363 | 6.276977 | 7.941216 | 5.782487 |
| 17335364 | Mapk14    | mitogen-activated protein kinase 14                                           | 48.30799 | 45.99484 | 46.9932  | 50.33988 | 42.09976 | 39.90839 |
| 17312312 | Mapk15    | mitogen-activated protein kinase 15                                           | 11.09963 | 13.43924 | 11.08172 | 11.12058 | 10.9334  | 8.508    |
| 17483084 | Mapk3     | mitogen-activated protein kinase 3                                            | 135.1793 | 160.4077 | 244.063  | 166.7543 | 143.5202 | 132.9067 |
| 17355411 | Mapk4     | mitogen-activated protein kinase 4                                            | 9.88842  | 7.995565 | 7.995565 | 7.995565 | 6.531118 | 6.358427 |
| 17528836 | Mapk6     | mitogen-activated protein kinase 6                                            | 78.14058 | 82.80466 | 92.15688 | 68.82162 | 72.26975 | 72.46689 |
| 17263811 | Mapk7     | mitogen-activated protein kinase 7                                            | 15.21824 | 12.58384 | 12.2517  | 12.71906 | 13.67871 | 12.93322 |
| 17304976 | Mapk8     | mitogen-activated protein kinase 8                                            | 37.25443 | 34.57794 | 31.36796 | 29.63561 | 34.76925 | 30.85089 |
| 17388371 | Mapk8ip1  | mitogen-activated protein kinase 8 interacting protein 1                      | 7.498593 | 7.499113 | 7.40223  | 8.51685  | 6.904275 | 7.498593 |
| 17314164 | Mapk8ip2  | mitogen-activated protein kinase 8 interacting protein 2                      | 6.220239 | 7.618727 | 5.501023 | 7.157124 | 7.175802 | 6.536009 |
| 17342065 | Mapk8ip3  | mitogen-activated protein kinase 8 interacting protein 3                      | 18.35308 | 23.64249 | 23.53311 | 22.24979 | 18.45935 | 25.39055 |
| 17249057 | Mapk9     | mitogen-activated protein kinase 9                                            | 66.42802 | 66.42802 | 69.77992 | 70.87771 | 59.96089 | 56.66398 |
| 17370079 | Mapkap1   | mitogen-activated protein kinase associated protein 1                         | 85.2844  | 85.38436 | 78.70263 | 82.15691 | 70.78786 | 79.24236 |
| 17374939 | Mapkbp1   | mitogen-activated protein kinase binding protein 1                            | 8.076779 | 9.353135 | 10.32736 | 10.76943 | 10.32736 | 10.89293 |
| 17528160 | Map2k1    | mitogen-activated protein kinase kinase 1                                     | 61.42866 | 51.42222 | 52.1838  | 50.4996  | 52.1368  | 56.02776 |
| 17235539 | Map2k2    | mitogen-activated protein kinase kinase 2                                     | 136.348  | 125.9834 | 131.1915 | 121.936  | 122.8411 | 115.3801 |
| 17250533 | Map2k3    | mitogen-activated protein kinase kinase 3                                     | 73.30552 | 85.03589 | 82.18824 | 88.96957 | 84.07471 | 84.85396 |
| 17263705 | Map2k3os  | mitogen-activated protein kinase kinase 3, opposite strand                    | 12.06495 | 9.666007 | 11.93313 | 9.594316 | 6.84272  | 7.304016 |
| 17264189 | Map2k4    | mitogen-activated protein kinase kinase 4                                     | 60.90843 | 66.38981 | 56.85164 | 61.161   | 64.76534 | 65.42862 |
| 17528053 | Map2k5    | mitogen-activated protein kinase kinase 5                                     | 55.34995 | 49.68781 | 48.16957 | 57.98067 | 37.68321 | 62.56179 |
| 17257906 | Map2k6    | mitogen-activated protein kinase kinase 6                                     | 5.5228   | 8.679007 | 9.103365 | 8.12428  | 9.310251 | 10.50919 |
| 17498791 | Map2k7    | mitogen-activated protein kinase kinase 7                                     | 29.79524 | 26.34286 | 26.50183 | 25.42877 | 29.16103 | 27.03975 |
| 17296174 | Map3k1    | mitogen-activated protein kinase kinase kinase 1                              | 33.20733 | 30.60001 | 35.81123 | 32.2485  | 48.02787 | 31.88288 |
| 17488312 | Map3k10   | mitogen-activated protein kinase kinase kinase 10                             | 14.37739 | 14.12119 | 14.37739 | 15.56259 | 14.37739 | 14.37739 |
| 17356502 | Map3k11   | mitogen-activated protein kinase kinase kinase 11                             | 63.22091 | 49.96098 | 56.17047 | 52.39437 | 38.62786 | 44.79544 |
| 17315463 | Map3k12   | mitogen-activated protein kinase kinase kinase 12                             | 7.248186 | 4.474821 | 5.334821 | 4.258779 | 5.532724 | 5.296356 |
| 17322230 | Map3k12   | mitogen-activated protein kinase kinase kinase 12                             | 9.684718 | 8.62312  | 9.438123 | 8.640351 | 8.763882 | 8.390519 |
| 17324259 | Map3k13   | mitogen-activated protein kinase kinase kinase 13                             | 41.62764 | 43.96123 | 42.60675 | 45.36287 | 36.90745 | 33.32031 |
| 17270453 | Map3k14   | mitogen-activated protein kinase kinase kinase 14                             | 7.621104 | 6.934107 | 7.837752 | 10.72295 | 6.837837 | 9.503046 |
| 17539241 | Map3k15   | mitogen-activated protein kinase kinase kinase 15                             | 8.063968 | 9.879719 | 10.94432 | 9.606827 | 7.213003 | 9.421848 |
| 17226489 | Map3k19   | mitogen-activated protein kinase kinase kinase 19                             | 7.935879 | 9.803113 | 6.589002 | 6.171709 | 8.441387 | 7.935879 |
| 17349243 | Map3k2    | mitogen-activated protein kinase kinase kinase 2                              | 64.16613 | 67.49459 | 59.144   | 54.91582 | 48.79732 | 63.263   |
| 17257511 | Map3k3    | mitogen-activated protein kinase kinase kinase 3                              | 41.62793 | 43.54907 | 41.83011 | 42.09421 | 42.82674 | 42.14063 |
| 17340787 | Map3k4    | mitogen-activated protein kinase kinase kinase 4                              | 42.4161  | 28.37798 | 29.59743 | 32.29771 | 27.49715 | 32.63685 |
| 17231891 | Map3k5    | mitogen-activated protein kinase kinase kinase 5                              | 75.01307 | 78.35536 | 72.84207 | 80.82726 | 70.90129 | 93.62553 |
| 17419553 | Map3k6    | mitogen-activated protein kinase kinase kinase 6                              | 6.590509 | 9.263902 | 7.250347 | 10.11434 | 7.406695 | 8.193614 |
| 17412350 | Map3k7    | mitogen-activated protein kinase kinase kinase 7                              | 37.88251 | 41.9541  | 38.36902 | 42.83416 | 44.3733  | 41.21421 |
| 17352401 | Map3k8    | mitogen-activated protein kinase kinase kinase 8                              | 10.57327 | 12.23888 | 17.86805 | 11.19513 | 12.2433  | 8.677203 |
| 17282380 | Map3k9    | mitogen-activated protein kinase kinase kinase 9                              | 4.362001 | 6.53755  | 5.130111 | 5.130111 | 5.185956 | 5.587024 |
| 17476036 | Map4k1    | mitogen-activated protein kinase kinase kinase kinase 1                       | 5.403522 | 7.065688 | 5.403522 | 5.751108 | 4.295422 | 4.67994  |
| 17356811 | Map4k2    | mitogen-activated protein kinase kinase kinase kinase 2                       | 11.88624 | 17.42528 | 17.42528 | 14.9063  | 17.42528 | 16.43352 |
| 17347571 | Map4k3    | mitogen-activated protein kinase kinase kinase kinase 3                       | 62.69029 | 99.33361 | 93.29449 | 87.11988 | 86.21757 | 90.84782 |
| 17212138 | Map4k4    | mitogen-activated protein kinase kinase kinase kinase 4                       | 31.38689 | 44.48817 | 40.28889 | 36.84916 | 27.90535 | 27.43451 |
| 17281637 | Map4k5    | mitogen-activated protein kinase kinase kinase kinase 5                       | 38.44489 | 46.4485  | 45.5232  | 45.18807 | 37.36382 | 37.45302 |
| 17530863 | Mapkapk3  | mitogen-activated protein kinase-activated protein kinase 3                   | 13.24045 | 18.15783 | 19.38945 | 16.97736 | 17.70739 | 20.82883 |
| 17309065 | Mzt1      | mitotic spindle organizing protein 1                                          | 88.42669 | 67.82993 | 79.04761 | 86.1035  | 88.39482 | 95.35125 |
| 17328451 | Mzt2      | mitotic spindle organizing protein 2                                          | 16.90971 | 15.3676  | 16.07715 | 13.39423 | 16.85471 | 16.48246 |
| 17234972 | Misp      | mitotic spindle positioning                                                   | 8.973557 | 6.837884 | 8.71264  | 8.346203 | 9.310251 | 7.139238 |

|          |             |                                                                    |          |          |          |          |          |          |
|----------|-------------|--------------------------------------------------------------------|----------|----------|----------|----------|----------|----------|
| 17230463 | Mix1        | Mix1 homeobox-like 1 ( <i>Xenopus laevis</i> )                     | 4.288015 | 5.919191 | 4.472929 | 4.055613 | 4.300725 | 4.065154 |
| 17513076 | Mkl         | mixed lineage kinase domain-like                                   | 38.6903  | 40.28609 | 53.12982 | 44.54711 | 45.24919 | 30.16283 |
| 17319429 | Mkl1        | MKL (megakaryoblastic leukemia)/myocardin-like 1                   | 18.32219 | 19.49375 | 25.00891 | 18.32219 | 19.41729 | 16.43193 |
| 17323013 | Mkl2        | MKL/myocardin-like 2                                               | 63.95078 | 67.17302 | 70.28525 | 66.49758 | 64.32288 | 63.88432 |
| 17442284 | Mlxip       | MLX interacting protein                                            | 22.79239 | 30.50915 | 30.63332 | 27.84816 | 26.89582 | 25.69579 |
| 17443185 | Mlxip1      | MLX interacting protein-like                                       | 102.0321 | 181.3308 | 145.3886 | 197.1719 | 172.3372 | 160.2988 |
| 17364772 | Mms19       | MMS19 (MET18 <i>S. cerevisiae</i> )                                | 21.93176 | 28.74761 | 30.85367 | 30.88726 | 32.6631  | 33.83114 |
| 17412237 | Mms22l      | MMS22-like, DNA repair protein                                     | 6.287864 | 6.287864 | 6.287864 | 4.988825 | 5.325327 | 6.391125 |
| 17297112 | Mnd1-ps     | Mnd1 retrotransposed pseudogene                                    | 3.043307 | 2.470461 | 2.280278 | 2.445247 | 2.29746  | 2.522877 |
| 17212888 | Mob4        | MOB family member 4, phocein                                       | 45.231   | 39.60279 | 38.72598 | 37.89406 | 37.84445 | 42.09801 |
| 17460059 | Mob1a       | MOB kinase activator 1A                                            | 37.91035 | 42.20611 | 39.52901 | 34.66289 | 34.26444 | 40.65582 |
| 17438814 | Mob1b       | MOB kinase activator 1B                                            | 134.0818 | 100.4776 | 81.05336 | 101.4961 | 90.43003 | 100.0342 |
| 17498032 | Mob2        | MOB kinase activator 2                                             | 38.53907 | 34.22812 | 37.94164 | 38.38312 | 41.42788 | 47.04208 |
| 17243051 | Mob3a       | MOB kinase activator 3A                                            | 17.35477 | 17.69684 | 19.44881 | 15.07755 | 15.47374 | 19.74753 |
| 17423915 | Mob3b       | MOB kinase activator 3B                                            | 78.04855 | 77.62019 | 79.75262 | 70.35934 | 74.00239 | 62.07197 |
| 17417302 | Mob3c       | MOB kinase activator 3C                                            | 8.758355 | 11.00022 | 8.639513 | 10.18532 | 9.960789 | 8.982954 |
| 17417306 | Mob3c       | MOB kinase activator 3C                                            | 24.26979 | 20.50978 | 25.56114 | 17.52776 | 24.39917 | 21.36148 |
| 17283477 | Moap1       | modulator of apoptosis 1                                           | 21.64872 | 19.81114 | 21.68822 | 23.70649 | 23.35614 | 21.75673 |
| 17536364 | Msn         | moesin                                                             | 54.95885 | 57.97303 | 67.63321 | 48.29895 | 44.27683 | 47.68488 |
| 17352517 | Mkx         | mohawk homeobox                                                    | 3.006094 | 3.743869 | 3.743869 | 4.270722 | 4.352065 | 3.126828 |
| 17284020 | Mok         | MOK protein kinase                                                 | 4.40301  | 5.960238 | 4.780528 | 4.883041 | 5.557053 | 4.872087 |
| 17408765 | Mov10       | Moloney leukemia virus 10                                          | 31.84577 | 28.24865 | 27.8982  | 27.10242 | 34.89988 | 27.64468 |
| 17314019 | Mov10l1     | Moloney leukemia virus 10-like 1                                   | 4.762371 | 4.91537  | 4.054938 | 4.942634 | 4.885818 | 4.749975 |
| 17422992 | Mos         | Moloney sarcoma oncogene                                           | 2.823197 | 3.710002 | 3.203502 | 3.150411 | 3.34538  | 2.966764 |
| 17349016 | Mocos       | molybdenum cofactor sulfuryase                                     | 63.44392 | 51.19922 | 45.73035 | 60.27467 | 42.62654 | 42.64516 |
| 17338472 | Mocs1       | molybdenum cofactor synthesis 1                                    | 225.8483 | 154.8277 | 147.12   | 142.4785 | 113.3099 | 125.4684 |
| 17290056 | Mocs2       | molybdenum cofactor synthesis 2                                    | 171.7171 | 180.2768 | 180.1494 | 180.4593 | 179.2128 | 212.3853 |
| 17379986 | Mocs3       | molybdenum cofactor synthesis 3                                    | 12.99919 | 12.80699 | 9.991837 | 12.90788 | 17.43688 | 13.45397 |
| 17521475 | Mon1a       | MON1 homolog A (yeast)                                             | 37.29447 | 35.0208  | 36.94891 | 37.29447 | 37.29447 | 34.09244 |
| 17505826 | Mon1b       | MON1 homolog b (yeast)                                             | 49.65338 | 50.24611 | 47.28072 | 45.4822  | 41.69608 | 35.70564 |
| 17245587 | Mon2        | MON2 homolog (yeast)                                               | 114.1574 | 94.58569 | 92.91374 | 103.5648 | 98.41798 | 104.1032 |
| 17214672 | Mogat1      | monoacylglycerol O-acyltransferase 1                               | 12.55204 | 14.10994 | 16.83206 | 10.25524 | 8.971007 | 9.111256 |
| 17493643 | Mogat2      | monoacylglycerol O-acyltransferase 2                               | 10.31856 | 9.64566  | 11.54591 | 13.20068 | 8.768621 | 10.31856 |
| 17533474 | Maoa        | monoamine oxidase A                                                | 18.51689 | 26.51065 | 29.30774 | 22.08263 | 12.07005 | 12.35044 |
| 17540378 | Maob        | monoamine oxidase B                                                | 399.1397 | 419.5968 | 418.9371 | 380.4808 | 425.463  | 495.7641 |
| 17255064 | Mmd         | monocyte to macrophage differentiation-associated                  | 58.26429 | 60.32107 | 59.77043 | 67.25036 | 51.67269 | 58.37465 |
| 17454692 | Mmd2        | monocyte to macrophage differentiation-associated 2                | 53.10074 | 58.82306 | 75.3915  | 61.46571 | 51.28731 | 59.51494 |
| 17460665 | Mgll        | monoglyceride lipase                                               | 125.1609 | 139.2738 | 138.4096 | 134.1832 | 84.93222 | 96.0391  |
| 17232215 | Moxd1       | monooxygenase, DBH-like 1                                          | 8.036961 | 4.925841 | 4.750337 | 4.762866 | 6.610274 | 4.711544 |
| 17466239 | Moxd2       | monooxygenase, DBH-like 2                                          | 3.236916 | 3.681669 | 3.990861 | 4.573346 | 3.30129  | 3.551578 |
| 17447510 | Mrfap1      | Morf4 family associated protein 1                                  | 109.3887 | 112.6099 | 116.0522 | 99.60319 | 120.1015 | 109.5982 |
| 17422488 | Morn1       | MORN repeat containing 1                                           | 7.561959 | 9.166303 | 9.401363 | 7.799221 | 7.761148 | 8.379708 |
| 17339934 | Morn2       | MORN repeat containing 2                                           | 16.09622 | 19.0619  | 21.76367 | 17.73134 | 20.2099  | 17.69684 |
| 17452540 | Morn3       | MORN repeat containing 3                                           | 10.74222 | 11.53287 | 9.094914 | 11.29929 | 8.680993 | 11.69865 |
| 17364805 | Morn4       | MORN repeat containing 4                                           | 7.098332 | 9.023018 | 9.229548 | 10.08626 | 9.023018 | 9.525864 |
| 17370277 | Morn5       | MORN repeat containing 5                                           | 6.305147 | 6.868619 | 6.532793 | 7.615137 | 6.430139 | 6.317615 |
| 17529647 | Morf4l1     | mortality factor 4 like 1                                          | 24.27888 | 21.99449 | 17.2368  | 19.57174 | 14.80487 | 25.46176 |
| 17324469 | Morf4l1-ps1 | mortality factor 4 like 1, pseudogene 1                            | 5.396709 | 7.491788 | 7.742503 | 6.402565 | 4.352065 | 6.241748 |
| 17544754 | Morf4l2     | mortality factor 4 like 2                                          | 26.83009 | 22.55601 | 18.07633 | 22.6882  | 19.22978 | 20.16232 |
| 17541760 | Mospd1      | motile sperm domain containing 1                                   | 69.43013 | 66.07213 | 57.77406 | 53.5929  | 60.5351  | 55.63767 |
| 17545979 | Mospd2      | motile sperm domain containing 2                                   | 29.9134  | 29.6198  | 31.82768 | 32.3912  | 27.61729 | 33.65969 |
| 17454069 | Mospd3      | motile sperm domain containing 3                                   | 36.52621 | 38.98589 | 39.60526 | 36.77211 | 33.57045 | 36.45917 |
| 17354258 | Mospd4      | motile sperm domain containing 4                                   | 12.67584 | 9.795098 | 8.734953 | 11.57668 | 12.07265 | 10.15044 |
| 17446608 | Mnx1        | motor neuron and pancreas homeobox 1                               | 3.318773 | 3.454292 | 3.318773 | 3.318773 | 3.318773 | 3.729055 |
| 17491816 | Mphosph10   | M-phase phosphoprotein 10 (U3 small nucleolar ribonucleoprotein)   | 17.41115 | 16.34922 | 12.33392 | 18.74196 | 17.36355 | 17.40609 |
| 17300839 | Mphosph8    | M-phase phosphoprotein 8                                           | 20.05597 | 16.34854 | 18.99727 | 17.81524 | 19.62866 | 19.94147 |
| 17452776 | Mphosph9    | M-phase phosphoprotein 9                                           | 10.4724  | 16.07782 | 14.57617 | 12.19696 | 12.53561 | 12.75225 |
| 17285448 | Mplkip      | M-phase specific PLK1 interacting protein                          | 46.04204 | 38.90787 | 46.20509 | 31.94681 | 41.16111 | 40.82526 |
| 17338684 | Mpnd        | MPN domain containing                                              | 55.92301 | 48.04985 | 55.59603 | 54.22063 | 62.00489 | 54.5849  |
| 17446836 | Mpv17       | Mpv17 mitochondrial inner membrane protein                         | 201.7689 | 176.6623 | 171.6766 | 142.288  | 136.7038 | 143.7472 |
| 17510129 | Mpv17l2     | MPV17 mitochondrial membrane protein-like 2                        | 25.58382 | 37.64927 | 35.07497 | 37.64927 | 35.59493 | 39.07679 |
| 17323098 | Mpv17l      | Mpv17 transgene, kidney disease mutant-like                        | 27.9935  | 33.19583 | 30.35285 | 33.16455 | 35.38142 | 37.9611  |
| 17380790 | Mrgbp       | MRG/MORF4L binding protein                                         | 17.1824  | 15.9754  | 16.46214 | 12.29713 | 17.70445 | 15.99235 |
| 17431895 | Mrto4       | mRNA turnover 4, homolog ( <i>S. cerevisiae</i> )                  | 47.84181 | 34.04214 | 39.24427 | 35.69574 | 34.5286  | 36.8627  |
| 17291374 | Mrs2        | MRS2 magnesium homeostasis factor homolog ( <i>S. cerevisiae</i> ) | 37.47847 | 37.99032 | 36.08006 | 31.31322 | 28.95679 | 29.65513 |
| 17495106 | Mrv1        | MRV integration site 1                                             | 10.16607 | 9.618287 | 7.711973 | 8.790346 | 8.790346 | 8.790346 |
| 17447610 | Msx1        | msh homeobox 1                                                     | 16.37667 | 16.65046 | 15.96566 | 13.73552 | 15.96566 | 15.46505 |
| 17437049 | Msx1os      | msh homeobox 1 opposite strand                                     | 4.01461  | 4.647678 | 5.230105 | 4.401423 | 4.661583 | 5.108395 |
| 17292671 | Msx2        | msh homeobox 2                                                     | 4.260846 | 4.642301 | 3.721876 | 3.040967 | 3.698551 | 3.616866 |
| 17497576 | Msx3        | msh homeobox 3                                                     | 5.715541 | 7.189892 | 8.82851  | 6.093326 | 5.884541 | 6.486139 |
| 17303821 | Mss51       | MSS51 mitochondrial translational activator                        | 3.754316 | 4.647678 | 6.001237 | 4.647678 | 6.982966 | 4.647678 |
| 17341872 | Mlst8       | MTOR associated protein, LST8 homolog ( <i>S. cerevisiae</i> )     | 18.19512 | 18.76861 | 18.76926 | 16.70618 | 15.95338 | 16.10247 |
| 17399374 | Muc1        | mucin 1, transmembrane                                             | 8.381741 | 8.15322  | 8.917195 | 8.313984 | 6.428891 | 6.861053 |
| 17325093 | Muc13       | mucin 13, epithelial transmembrane                                 | 5.759246 | 5.617429 | 5.617429 | 5.971941 | 5.617429 | 5.617429 |
| 17374156 | Muc15       | mucin 15                                                           | 2.619879 | 3.258369 | 2.613947 | 2.74111  | 3.331473 | 3.0899   |
| 17524311 | Muc16       | mucin 16                                                           | 3.877294 | 3.287361 | 3.267212 | 3.267212 | 4.25008  | 3.21026  |
| 17314373 | Muc19       | mucin 19                                                           | 3.787485 | 4.174664 | 4.607231 | 3.091485 | 5.120306 | 4.886969 |
| 17314375 | Muc19       | mucin 19                                                           | 4.820524 | 6.517958 | 7.169338 | 5.043621 | 5.665723 | 6.252746 |
| 17484991 | Muc2        | mucin 2                                                            | 9.774006 | 11.54831 | 10.77772 | 10.62006 | 9.581822 | 10.62006 |
| 17485019 | Muc2        | mucin 2                                                            | 3.941104 | 3.922681 | 3.369676 | 3.935645 | 3.778255 | 3.764374 |
| 17329864 | Muc20       | mucin 20                                                           | 4.832936 | 7.362675 | 7.436481 | 5.057029 | 5.533721 | 7.78561  |
| 17453839 | Muc3        | mucin 3, intestinal                                                | 5.56106  | 6.180528 | 6.252963 | 5.623039 | 5.56106  | 5.56106  |
| 17453874 | Muc3a       | mucin 3A, cell surface associated                                  | 3.799185 | 6.301695 | 6.087585 | 6.248544 | 4.58687  | 4.794765 |
| 17324883 | Muc4        | mucin 4                                                            | 7.037339 | 6.724048 | 7.348399 | 6.735383 | 6.646938 | 6.247418 |

|          |               |                                                                                             |          |          |          |          |          |          |
|----------|---------------|---------------------------------------------------------------------------------------------|----------|----------|----------|----------|----------|----------|
| 17485098 | Muc5b         | mucin 5, subtype B, tracheobronchial                                                        | 6.995368 | 6.835941 | 8.013486 | 6.835941 | 6.083873 | 8.212093 |
| 17485039 | Muc5ac        | mucin 5, subtypes A and C, tracheobronchial/gastric                                         | 4.610681 | 5.780603 | 4.987615 | 4.682568 | 4.987615 | 4.987615 |
| 17497980 | Muc6          | mucin 6, gastric                                                                            | 5.675785 | 6.3921   | 6.297111 | 6.316608 | 6.362483 | 6.42702  |
| 17404958 | LOC102632538  | mucin-1-like                                                                                | 5.617429 | 6.616049 | 5.617429 | 5.777318 | 7.620312 | 5.337263 |
| 17322444 | Muc2          | mucin-like 2                                                                                | 2.412502 | 2.67402  | 2.685257 | 2.316216 | 2.524312 | 2.67402  |
| 17498607 | Mcoln1        | mucolipin 1                                                                                 | 57.21375 | 63.42194 | 64.9992  | 49.5032  | 49.08737 | 45.73574 |
| 17403490 | Mcoln2        | mucolipin 2                                                                                 | 5.410418 | 8.538366 | 7.635645 | 8.667645 | 6.836605 | 7.256631 |
| 17403473 | Mcoln3        | mucolipin 3                                                                                 | 7.90919  | 8.916145 | 9.310251 | 10.12184 | 9.379168 | 8.493328 |
| 17219751 | Mptx1         | mucosal pentraxin 1                                                                         | 3.062691 | 4.374475 | 2.752934 | 3.321328 | 3.263862 | 3.03848  |
| 17229981 | Mptx2         | mucosal pentraxin 2                                                                         | 8.701355 | 7.185507 | 9.655627 | 12.0765  | 10.2922  | 11.09179 |
| 17234898 | Madcam1       | mucosal vascular addressin cell adhesion molecule 1                                         | 9.43191  | 9.302316 | 9.43191  | 8.826491 | 8.041641 | 9.43191  |
| 17289977 | Mcidas        | multiciliate differentiation and DNA synthesis associated cell cycle protein                | 6.626881 | 8.015264 | 7.374269 | 7.392078 | 6.080542 | 7.176249 |
| 17459097 | Mmrn1         | multimerin 1                                                                                | 5.494812 | 4.948804 | 5.198192 | 5.564685 | 4.646035 | 4.457269 |
| 17298825 | Mmrn2         | multimerin 2                                                                                | 48.9854  | 44.9547  | 51.04756 | 46.30224 | 36.28698 | 39.46167 |
| 17288780 | Mctp1         | multiple C2 domains, transmembrane 1                                                        | 3.244621 | 3.745271 | 4.269361 | 3.703322 | 3.703322 | 3.298134 |
| 17492078 | Mctp2         | multiple C2 domains, transmembrane 2                                                        | 39.88903 | 35.41896 | 30.21996 | 33.72017 | 38.8109  | 31.08895 |
| 17347903 | Mcfid         | multiple coagulation factor deficiency 2                                                    | 63.2744  | 63.02796 | 63.2744  | 62.3622  | 70.4052  | 49.44902 |
| 17350762 | Megf10        | multiple EGF-like-domains 10                                                                | 5.430895 | 6.900735 | 5.692491 | 5.60576  | 4.33809  | 5.934844 |
| 17518342 | Megf11        | multiple EGF-like-domains 11                                                                | 9.299222 | 9.488237 | 9.897814 | 9.91182  | 9.310251 | 13.09796 |
| 17422337 | Megf6         | multiple EGF-like-domains 6                                                                 | 6.657867 | 6.746784 | 7.642052 | 6.589459 | 6.375993 | 6.746784 |
| 17475251 | Megf8         | multiple EGF-like-domains 8                                                                 | 11.02457 | 13.75038 | 12.51659 | 12.17635 | 11.79947 | 9.9463   |
| 17426497 | Megf9         | multiple EGF-like-domains 9                                                                 | 75.4443  | 72.49    | 87.13618 | 80.25003 | 90.95746 | 81.69353 |
| 17356794 | Men1          | multiple endocrine neoplasia 1                                                              | 38.85801 | 36.96582 | 46.86406 | 43.90307 | 44.6934  | 42.8915  |
| 17358682 | Minpp1        | multiple inositol polyphosphate histidine phosphatase 1                                     | 81.1883  | 80.09609 | 80.3842  | 87.73557 | 89.75124 | 86.703   |
| 17426700 | Mpdz          | multiple PDZ domain protein                                                                 | 25.53935 | 24.236   | 26.7495  | 26.23553 | 26.45723 | 22.98467 |
| 17502221 | Mvb12a        | multivesicular body subunit 12A                                                             | 75.65849 | 74.44949 | 85.09662 | 74.67586 | 74.76598 | 75.11296 |
| 17384205 | Mvb12b        | multivesicular body subunit 12B                                                             | 8.655337 | 9.032028 | 11.35913 | 8.872434 | 6.191762 | 8.410433 |
| 17462529 | Mug1          | murinoglobulin 1                                                                            | 3887.67  | 3338.768 | 2704.395 | 3603.667 | 3510.328 | 3113.346 |
| 17462566 | Mug2          | murinoglobulin 2                                                                            | 831.4121 | 579.8958 | 362.2621 | 551.3406 | 1060.979 | 910.8944 |
| 17462602 | Gm10319       | murinoglobulin pseudogene                                                                   | 281.611  | 195.4926 | 146.5186 | 204.0388 | 199.1511 | 176.023  |
| 17462608 | Mug-ps1       | murinoglobulin, pseudogene 1                                                                | 245.9464 | 244.7695 | 173.7621 | 222.3625 | 206.2943 | 208.4532 |
| 17361617 | Mus81         | MUS81 endonuclease homolog (yeast)                                                          | 24.72502 | 20.11347 | 19.77519 | 28.55774 | 21.98092 | 29.14285 |
| 17441134 | Msi1          | musashi RNA-binding protein 1                                                               | 2.938276 | 3.384071 | 2.827917 | 2.467637 | 3.261397 | 2.94011  |
| 17441140 | Msi1          | musashi RNA-binding protein 1                                                               | 8.464472 | 10.54692 | 11.88113 | 10.48228 | 10.48228 | 10.48228 |
| 17267559 | Msi2          | musashi RNA-binding protein 2                                                               | 36.16996 | 33.02187 | 37.02788 | 39.33223 | 37.71561 | 37.02788 |
| 17530059 | Mras          | muscle and microspikes RAS                                                                  | 9.511085 | 8.605267 | 8.324191 | 7.572869 | 5.639941 | 6.489557 |
| 17356874 | Pygm          | muscle glycogen phosphorylase                                                               | 5.933733 | 6.075487 | 6.865715 | 6.951768 | 6.342361 | 6.73669  |
| 17414385 | Musk          | muscle, skeletal, receptor tyrosine kinase                                                  | 3.216073 | 3.49977  | 3.171027 | 3.216073 | 3.078527 | 3.170587 |
| 17397936 | Mbnl1         | muscleblind-like 1 (Drosophila)                                                             | 171.4709 | 166.1393 | 165.7414 | 144.3813 | 133.5069 | 141.7662 |
| 17302754 | Mbnl2         | muscleblind-like 2                                                                          | 136.8906 | 115.1747 | 151.632  | 130.0858 | 108.6143 | 104.8258 |
| 17541618 | Mbnl3         | muscleblind-like 3 (Drosophila)                                                             | 4.549254 | 4.643073 | 5.000665 | 4.676762 | 3.902909 | 5.722399 |
| 17414032 | Murc          | muscle-related coiled-coil protein                                                          | 3.620754 | 5.37029  | 3.675167 | 3.091421 | 3.563266 | 3.016007 |
| 17528947 | Mlip          | muscular LMNA-interacting protein                                                           | 3.736325 | 4.183586 | 3.181705 | 3.787485 | 3.632745 | 3.918251 |
| 17221396 | Msc           | musculin                                                                                    | 14.23825 | 12.19062 | 10.66876 | 14.43921 | 12.64627 | 14.23825 |
| 17298262 | Mustn1        | musculoskeletal, embryonic nuclear protein 1                                                | 31.65628 | 58.82796 | 68.08051 | 47.55417 | 45.7481  | 36.64209 |
| 17456995 | Mkln1         | muskelin 1, intracellular mediator containing kelch motifs                                  | 82.65728 | 83.62776 | 82.65728 | 91.53046 | 81.40469 | 82.02149 |
| 17465614 | Mkln1os       | muskelin 1, intracellular mediator containing kelch motifs, opposite strand                 | 12.64574 | 10.95107 | 11.56746 | 12.23083 | 10.20546 | 12.15426 |
| 17354189 | Mcc           | mutated in colorectal cancers                                                               | 95.5769  | 70.22778 | 88.21182 | 94.23036 | 94.42782 | 138.9257 |
| 17531709 | Mlh1          | mutL homolog 1 (E. coli)                                                                    | 31.83275 | 27.60696 | 26.1716  | 30.67157 | 35.55918 | 29.98356 |
| 17282673 | Mlh3          | mutL homolog 3 (E. coli)                                                                    | 13.85054 | 13.29581 | 13.89034 | 17.58094 | 15.6334  | 10.21445 |
| 17340285 | Msh2          | mutS homolog 2 (E. coli)                                                                    | 9.756881 | 10.5356  | 11.39769 | 10.5356  | 9.777394 | 10.69941 |
| 17294860 | Msh3          | mutS homolog 3 (E. coli)                                                                    | 20.40852 | 22.73038 | 20.80748 | 22.5992  | 22.7255  | 21.93572 |
| 17411277 | Msh4          | mutS homolog 4 (E. coli)                                                                    | 5.717126 | 5.678697 | 5.456175 | 5.228909 | 5.92465  | 5.92465  |
| 17344158 | Msh5          | mutS homolog 5 (E. coli)                                                                    | 5.977988 | 6.975758 | 7.647669 | 6.893181 | 8.115275 | 7.14607  |
| 17340307 | Msh6          | mutS homolog 6 (E. coli)                                                                    | 12.60592 | 11.73219 | 12.10214 | 10.10012 | 10.26463 | 13.45807 |
| 17417530 | Mutyh         | mutY homolog (E. coli)                                                                      | 4.123387 | 4.612983 | 4.497147 | 4.497147 | 5.199634 | 5.522303 |
| 17332531 | Mx1           | MX dynamin-like GTPase 1                                                                    | 3.660143 | 2.780376 | 2.867851 | 3.168061 | 2.71637  | 3.114931 |
| 17327557 | Mx2           | MX dynamin-like GTPase 2                                                                    | 9.729529 | 10.08123 | 10.95168 | 10.06196 | 12.69405 | 13.73105 |
| 17252369 | Mybbp1a       | MYB binding protein (P160) 1a                                                               | 86.20861 | 69.93438 | 70.42911 | 62.1542  | 77.3168  | 70.83694 |
| 17436755 | Msantd1       | Myb/SANT-like DNA-binding domain containing 1                                               | 6.289956 | 5.980599 | 5.534949 | 7.744918 | 6.868857 | 6.44759  |
| 17516068 | Msantd2       | Myb/SANT-like DNA-binding domain containing 2                                               | 11.00388 | 14.53602 | 16.19796 | 13.21972 | 13.21972 | 16.70653 |
| 17414009 | Msantd3       | Myb/SANT-like DNA-binding domain containing 3                                               | 7.22381  | 8.073924 | 9.62589  | 9.537426 | 9.277654 | 7.349724 |
| 17514417 | Msantd4       | Myb/SANT-like DNA-binding domain containing 4 with coiled-coils                             | 74.09632 | 64.56006 | 65.59664 | 64.56006 | 61.9907  | 54.1579  |
| 17427284 | Mysm1         | myb-like, SWIRM and MPN domains 1                                                           | 22.09457 | 20.81281 | 21.70311 | 23.05392 | 22.85456 | 23.25856 |
| 17474389 | Mypop         | Myb-related transcription factor, partner of profilin                                       | 45.45667 | 42.42933 | 47.30399 | 42.22981 | 44.64913 | 41.4727  |
| 17487144 | Mypopos       | Myb-related transcription factor, partner of profilin, opposite strand                      | 9.933692 | 8.832183 | 6.509334 | 7.316887 | 8.455441 | 7.557348 |
| 17309172 | Mycbp2        | MYC binding protein 2                                                                       | 37.23455 | 38.31746 | 39.56986 | 39.56986 | 37.49588 | 39.38952 |
| 17326472 | Mina          | myc induced nuclear antigen                                                                 | 20.59697 | 18.6267  | 18.97384 | 19.04209 | 16.08328 | 16.05188 |
| 17467363 | 4930515G16Rik | myc induced nuclear antigen pseudogene                                                      | 2.82398  | 2.628774 | 2.937502 | 2.683117 | 2.819071 | 2.668668 |
| 17231477 | Myct1         | myc target 1                                                                                | 19.36125 | 13.78445 | 20.88912 | 17.18157 | 14.34295 | 14.46506 |
| 17496555 | Maz           | MYC-associated zinc finger protein (purine-binding transcription factor)                    | 41.4842  | 32.57809 | 42.43786 | 39.09223 | 38.14971 | 40.79555 |
| 17267970 | Mycbpap       | MYCBP associated protein                                                                    | 5.398655 | 5.398655 | 5.386134 | 5.386134 | 5.398655 | 5.826381 |
| 17330337 | Maats1        | MYCBP-associated, testis expressed 1                                                        | 3.703322 | 3.726135 | 3.891968 | 3.703322 | 3.46775  | 3.207413 |
| 17325578 | Maats1os      | MYCBP-associated, testis expressed 1, opposite strand [Source:MGI Symbol;Acc:MGI:102632538] | 3.25115  | 3.211729 | 3.462322 | 3.462322 | 3.787222 | 3.434952 |
| 17539758 | Mycs          | myc-like oncogene, s-myc protein                                                            | 5.469428 | 4.326019 | 4.876581 | 5.386134 | 7.140475 | 4.910841 |
| 17391332 | Mal           | myelin and lymphocyte protein, T cell differentiation protein                               | 8.744828 | 8.052518 | 8.007545 | 8.161758 | 7.880024 | 7.292937 |
| 17352175 | Mbp           | myelin basic protein                                                                        | 9.361307 | 8.286196 | 9.361307 | 9.37202  | 10.1617  | 9.310251 |
| 17390844 | Myef2         | myelin basic protein expression factor 2, repressor                                         | 20.79853 | 17.61265 | 17.75582 | 19.13855 | 18.02728 | 17.61383 |
| 17396064 | Gm9833        | myelin basic protein expression factor 2, repressor pseudogene                              | 2.763526 | 2.377969 | 2.361183 | 2.659804 | 2.274485 | 3.409216 |
| 17344822 | Mog           | myelin oligodendrocyte glycoprotein                                                         | 7.789442 | 8.380173 | 7.003034 | 6.316082 | 8.131942 | 7.205807 |
| 17219222 | Mpz           | myelin protein zero                                                                         | 6.242656 | 7.615454 | 8.286713 | 8.038409 | 8.212264 | 8.516024 |
| 17229259 | Mpzl1         | myelin protein zero-like 1                                                                  | 21.48265 | 21.68056 | 24.67897 | 27.56508 | 22.3746  | 16.18629 |
| 17516699 | Mpzl2         | myelin protein zero-like 2                                                                  | 62.19859 | 86.66815 | 74.54192 | 83.02765 | 95.90938 | 122.161  |
| 17516707 | Mpzl3         | myelin protein zero-like 3                                                                  | 28.88983 | 30.39959 | 29.52571 | 31.70767 | 37.86308 | 33.85554 |

|          |           |                                                                                   |          |          |          |          |          |          |
|----------|-----------|-----------------------------------------------------------------------------------|----------|----------|----------|----------|----------|----------|
| 17362616 | Myrf      | myelin regulatory factor                                                          | 46.0893  | 47.48336 | 48.86569 | 47.76096 | 48.21466 | 50.29698 |
| 17245124 | Myrfl     | myelin regulatory factor-like                                                     | 3.037785 | 3.337945 | 2.719271 | 2.93138  | 2.844963 | 2.719271 |
| 17381143 | Myt1      | myelin transcription factor 1                                                     | 7.979011 | 8.476155 | 6.668351 | 6.298246 | 8.457082 | 7.167848 |
| 17274670 | Myt1l     | myelin transcription factor 1-like                                                | 4.647678 | 4.128936 | 4.647678 | 5.718275 | 4.386226 | 5.54305  |
| 17489341 | Mag       | myelin-associated glycoprotein                                                    | 4.395204 | 4.717655 | 3.986244 | 4.395204 | 3.43967  | 4.395204 |
| 17523192 | Mobp      | myelin-associated oligodendrocytic basic protein                                  | 4.468529 | 5.368987 | 5.182578 | 5.420891 | 6.126232 | 5.630527 |
| 17239664 | Myb       | myeloblastosis oncogene                                                           | 6.148183 | 6.431878 | 6.009688 | 5.957801 | 6.163672 | 6.158675 |
| 17221158 | Mybl1     | myeloblastosis oncogene-like 1                                                    | 5.944807 | 11.28184 | 13.71802 | 7.917912 | 7.650001 | 8.417839 |
| 17379206 | Mybl2     | myeloblastosis oncogene-like 2                                                    | 6.620637 | 7.336744 | 7.010707 | 7.762062 | 8.289356 | 7.835851 |
| 17311846 | Myc       | myelocytomatosis oncogene                                                         | 27.21066 | 37.55544 | 46.90143 | 20.97821 | 28.36598 | 27.09078 |
| 17400418 | Mcl1      | myeloid cell leukemia sequence 1                                                  | 153.2656 | 198.3617 | 167.1211 | 172.1807 | 169.5609 | 180.5419 |
| 17230078 | Mnda      | myeloid cell nuclear differentiation antigen                                      | 41.48506 | 43.09444 | 72.87287 | 53.26884 | 46.80498 | 41.87276 |
| 17346175 | Mydgf     | myeloid derived growth factor                                                     | 63.40084 | 54.49984 | 50.06915 | 51.8812  | 58.9917  | 57.89753 |
| 17532137 | Myd88     | myeloid differentiation primary response gene 88                                  | 48.44816 | 54.80365 | 67.81253 | 51.38552 | 46.55519 | 45.26899 |
| 17398139 | Mlf1      | myeloid leukemia factor 1                                                         | 3.569347 | 2.648949 | 2.462869 | 2.984419 | 2.828917 | 2.921947 |
| 17462975 | Mlf2      | myeloid leukemia factor 2                                                         | 325.9123 | 290.6441 | 324.7285 | 286.758  | 247.4992 | 241.5286 |
| 17230067 | Mndal     | myeloid nuclear differentiation antigen like                                      | 7.586371 | 9.163063 | 13.22421 | 8.975921 | 12.77791 | 10.68185 |
| 17486635 | Mzf1      | myeloid zinc finger 1                                                             | 8.054639 | 7.936539 | 9.978964 | 6.657082 | 6.914045 | 12.33632 |
| 17346387 | Mllt1     | myeloid/lymphoid or mixed-lineage leukemia (trithorax homolog, Drosophila); trar  | 25.70042 | 24.9464  | 27.60237 | 32.7193  | 23.47137 | 25.33096 |
| 17367243 | Mllt10    | myeloid/lymphoid or mixed-lineage leukemia (trithorax homolog, Drosophila); trar  | 52.13571 | 54.84165 | 55.06181 | 54.28155 | 50.32523 | 53.78903 |
| 17407738 | Mllt11    | myeloid/lymphoid or mixed-lineage leukemia (trithorax homolog, Drosophila); trar  | 8.429283 | 8.950449 | 11.77455 | 12.08587 | 11.63097 | 9.077909 |
| 17427033 | Mllt3     | myeloid/lymphoid or mixed-lineage leukemia (trithorax homolog, Drosophila); trar  | 11.18404 | 11.25856 | 13.2761  | 10.38932 | 10.05011 | 11.20492 |
| 17333418 | Mllt4     | myeloid/lymphoid or mixed-lineage leukemia (trithorax homolog, Drosophila); trar  | 65.22757 | 64.19771 | 69.78379 | 65.44223 | 62.76246 | 59.3333  |
| 17255828 | Mllt6     | myeloid/lymphoid or mixed-lineage leukemia (trithorax homolog, Drosophila); trar  | 32.85634 | 32.09752 | 36.51633 | 38.03221 | 34.9621  | 37.68896 |
| 17473127 | Myadm     | myeloid-associated differentiation marker                                         | 25.6819  | 32.46673 | 49.66439 | 29.10006 | 30.51782 | 35.81743 |
| 17273253 | Myadml2   | myeloid-associated differentiation marker-like 2                                  | 4.325899 | 4.801649 | 4.264599 | 4.706387 | 3.468039 | 4.681043 |
| 17259438 | Myadml2os | myeloid-associated differentiation marker-like 2, opposite strand [Source:MGI Sym | 8.261937 | 7.095577 | 8.052462 | 9.870478 | 7.69526  | 8.166512 |
| 17225586 | Myeov2    | myeloma overexpressed 2                                                           | 23.80166 | 20.52428 | 19.39926 | 19.60745 | 17.97313 | 19.41729 |
| 17254877 | Mpo       | myeloperoxidase                                                                   | 5.658384 | 6.704408 | 5.571787 | 4.362152 | 5.337115 | 5.102273 |
| 17429191 | Mpl       | myeloproliferative leukemia virus oncogene                                        | 10.07767 | 12.22447 | 11.34386 | 10.68459 | 8.728175 | 10.05876 |
| 17451186 | Miat      | myocardial infarction associated transcript (non-protein coding)                  | 4.681043 | 5.091321 | 4.681043 | 3.643816 | 4.562043 | 4.486405 |
| 17365700 | Mirt1     | myocardial infarction associated transcript 1                                     | 7.540081 | 7.095823 | 6.810072 | 7.32846  | 6.837552 | 5.694503 |
| 17318422 | Mirt2     | myocardial infarction associated transcript 2                                     | 12.45307 | 11.13176 | 14.31296 | 15.7771  | 9.519    | 17.49729 |
| 17528673 | Myzap     | myocardial zonula adherens protein                                                | 9.963827 | 8.907188 | 9.292972 | 9.292972 | 9.292972 | 9.560857 |
| 17264159 | Myocd     | myocardin                                                                         | 5.656501 | 6.17663  | 6.17663  | 6.706779 | 5.927033 | 5.59113  |
| 17218752 | Myoc      | myocilin                                                                          | 6.020945 | 5.292722 | 3.64791  | 5.488036 | 4.242398 | 4.358646 |
| 17491979 | Mef2a     | myocyte enhancer factor 2A                                                        | 124.4783 | 160.4278 | 147.7936 | 123.1609 | 114.645  | 123.8955 |
| 17501828 | Mef2b     | myocyte enhancer factor 2B                                                        | 3.719014 | 4.84387  | 3.883453 | 4.982086 | 6.01936  | 4.517235 |
| 17288917 | Mef2c     | myocyte enhancer factor 2C                                                        | 12.35489 | 10.88817 | 12.47078 | 10.16297 | 10.13869 | 11.85702 |
| 17398970 | Mef2d     | myocyte enhancer factor 2D                                                        | 69.73447 | 73.98136 | 83.84774 | 67.88872 | 50.82795 | 55.65309 |
| 17345728 | Mdfi      | MyoD family inhibitor                                                             | 14.99584 | 11.01578 | 13.12359 | 12.60295 | 9.001154 | 11.21999 |
| 17456121 | Mdfic     | MyoD family inhibitor domain containing                                           | 47.3017  | 54.78162 | 52.09489 | 45.50774 | 48.6946  | 48.6946  |
| 17364280 | Myof      | myoferlin                                                                         | 9.117827 | 11.34646 | 11.53    | 7.720049 | 8.113419 | 9.183219 |
| 17478175 | Myod1     | myogenic differentiation 1                                                        | 5.876104 | 7.120359 | 5.160926 | 7.758835 | 8.144917 | 7.047248 |
| 17244726 | Myf5      | myogenic factor 5                                                                 | 9.94244  | 9.03566  | 9.713896 | 9.029963 | 11.96576 | 8.337703 |
| 17244732 | Myf6      | myogenic factor 6                                                                 | 4.765277 | 5.974964 | 5.644282 | 5.31478  | 6.013938 | 5.31478  |
| 17217428 | Myog      | myogenin                                                                          | 15.86714 | 18.00094 | 10.39163 | 16.66501 | 10.61138 | 17.923   |
| 17318741 | Mb        | myoglobin                                                                         | 8.017987 | 7.386751 | 7.046222 | 6.022991 | 7.558395 | 8.688578 |
| 17501976 | Isyna1    | myo-inositol 1-phosphate synthase A1                                              | 41.62793 | 73.06608 | 117.5076 | 52.22215 | 45.43903 | 42.30335 |
| 17314120 | Miox      | myo-inositol oxygenase                                                            | 9.344452 | 7.76061  | 7.274711 | 6.632717 | 7.298854 | 7.615031 |
| 17339395 | Myom1     | myomesin 1                                                                        | 3.720303 | 3.207279 | 4.83498  | 5.036215 | 3.489112 | 3.57353  |
| 17499485 | Myom2     | myomesin 2                                                                        | 3.260289 | 3.884907 | 4.462493 | 4.086625 | 3.587876 | 3.709899 |
| 17419902 | Myom3     | myomesin family, member 3                                                         | 8.138258 | 8.352453 | 6.88745  | 8.138258 | 8.731987 | 8.138258 |
| 17396553 | Mynn      | myoneurin                                                                         | 14.95183 | 16.23595 | 11.03473 | 12.61764 | 15.53069 | 11.7944  |
| 17241553 | Mypn      | myopalladin                                                                       | 6.201856 | 6.050146 | 5.483055 | 5.952889 | 6.091848 | 5.568929 |
| 17234131 | Mrln      | myoregulin                                                                        | 3.861443 | 3.274989 | 3.703322 | 4.280561 | 3.160757 | 4.135094 |
| 17440885 | Myo1h     | myosin 1H                                                                         | 5.650114 | 5.916566 | 4.357619 | 5.50129  | 5.71558  | 6.276151 |
| 17373189 | Mybpc3    | myosin binding protein C, cardiac                                                 | 7.087221 | 5.936078 | 6.429382 | 6.5765   | 7.008958 | 6.942042 |
| 17490245 | Mybpc2    | myosin binding protein C, fast-type                                               | 3.066281 | 4.485597 | 4.597151 | 5.088252 | 3.729055 | 4.485597 |
| 17243910 | Mybpc1    | myosin binding protein C, slow-type                                               | 6.225544 | 6.817865 | 6.185328 | 7.676986 | 7.204309 | 6.633545 |
| 17217415 | Mybph     | myosin binding protein H                                                          | 9.98097  | 11.32618 | 9.658974 | 11.64993 | 11.0022  | 12.37108 |
| 17401699 | Mybphl    | myosin binding protein H-like                                                     | 4.387868 | 4.595303 | 4.84874  | 3.953745 | 6.002485 | 6.421231 |
| 17300390 | Mhrt      | myosin heavy chain associated RNA transcript                                      | 6.431878 | 7.386034 | 6.716222 | 7.333643 | 6.865287 | 8.853083 |
| 17238111 | Myo1a     | myosin 1A                                                                         | 3.016551 | 3.803164 | 4.235346 | 3.884153 | 5.180172 | 4.639052 |
| 17222837 | Myo1b     | myosin 1B                                                                         | 253.1941 | 207.8343 | 167.3181 | 248.5289 | 247.6313 | 235.4978 |
| 17253055 | Myo1c     | myosin 1C                                                                         | 50.86389 | 47.24501 | 47.81429 | 42.59375 | 38.39616 | 36.57383 |
| 17266698 | Myo1d     | myosin 1D                                                                         | 52.70617 | 47.40443 | 66.06297 | 42.68508 | 39.49368 | 40.26767 |
| 17519022 | Myo1e     | myosin 1E                                                                         | 82.28343 | 71.40534 | 79.23742 | 73.16694 | 81.07471 | 76.37137 |
| 17336114 | Myo1f     | myosin 1F                                                                         | 9.488237 | 9.488237 | 10.66876 | 10.02639 | 7.905737 | 8.434836 |
| 17260369 | Myo1g     | myosin 1G                                                                         | 4.788388 | 6.914189 | 9.561785 | 7.749429 | 5.611786 | 5.529772 |
| 17367473 | Myo3a     | myosin IIIA                                                                       | 3.276238 | 2.776197 | 3.024172 | 3.263862 | 2.456288 | 2.944025 |
| 17371574 | Myo3b     | myosin IIIB                                                                       | 2.797349 | 3.336927 | 2.852645 | 2.828035 | 2.862528 | 2.802394 |
| 17518038 | Myo9a     | myosin IXa                                                                        | 18.928   | 22.88071 | 27.38758 | 15.56777 | 21.17749 | 19.16032 |
| 17502102 | Myo9b     | myosin IXb                                                                        | 34.95144 | 42.5669  | 44.64417 | 40.66935 | 44.02741 | 35.40153 |
| 17511336 | Mylk3     | myosin light chain kinase 3                                                       | 4.208482 | 4.015362 | 4.086229 | 3.884934 | 4.67968  | 4.424364 |
| 17291674 | Mylk4     | myosin light chain kinase family, member 4                                        | 3.630303 | 3.18656  | 3.263862 | 3.263862 | 3.625525 | 4.629672 |
| 17483242 | Mylpf     | myosin light chain, phosphorylatable, fast skeletal muscle                        | 4.270189 | 3.232141 | 3.314084 | 3.666669 | 4.538325 | 3.326834 |
| 17250266 | Mprlp     | myosin phosphatase Rho interacting protein                                        | 81.76661 | 100.0432 | 108.667  | 94.16702 | 82.05788 | 88.16414 |
| 17286962 | Myliip    | myosin regulatory light chain interacting protein                                 | 55.29856 | 54.87131 | 63.96097 | 59.0891  | 41.61524 | 44.19006 |
| 17519394 | Myo5a     | myosin VA                                                                         | 3.034481 | 3.248266 | 3.176923 | 3.567195 | 3.414158 | 3.335609 |
| 17351760 | Myo5b     | myosin VB                                                                         | 38.94483 | 40.00671 | 45.3151  | 42.24533 | 36.72371 | 38.90949 |
| 17519438 | Myo5c     | myosin VC                                                                         | 6.866953 | 7.408801 | 8.481974 | 6.258253 | 6.921429 | 6.369764 |
| 17519821 | Myo6      | myosin VI                                                                         | 124.1611 | 103.1321 | 96.4915  | 110.0542 | 99.48244 | 91.06912 |
| 17493467 | Myo7a     | myosin VIIA                                                                       | 27.30475 | 26.12828 | 29.00521 | 26.599   | 23.26824 | 24.71594 |

|          |         |                                                                                |          |          |          |          |          |          |
|----------|---------|--------------------------------------------------------------------------------|----------|----------|----------|----------|----------|----------|
| 17523201 | Myrip   | myosin VIIA and Rab interacting protein                                        | 9.341084 | 8.832979 | 7.858206 | 8.310758 | 8.51685  | 7.495683 |
| 17353271 | Myo7b   | myosin VIIB                                                                    | 7.017854 | 8.6288   | 7.952729 | 7.085796 | 7.344427 | 8.01832  |
| 17310589 | Myo10   | myosin X                                                                       | 117.519  | 109.3637 | 107.0158 | 97.69684 | 91.52792 | 84.17442 |
| 17254473 | Myo19   | myosin XIX                                                                     | 23.82295 | 25.05332 | 25.05332 | 24.29454 | 22.06503 | 21.61139 |
| 17250392 | Myo15   | myosin XV                                                                      | 6.030928 | 6.47464  | 5.322928 | 6.47464  | 6.030928 | 5.56106  |
| 17258374 | Myo15b  | myosin XVB                                                                     | 11.1024  | 11.6631  | 11.85785 | 12.88982 | 13.06233 | 9.182456 |
| 17498906 | Myo16   | myosin XVI                                                                     | 3.328172 | 3.513892 | 3.225784 | 3.551307 | 3.144629 | 3.494001 |
| 17253316 | Myo18a  | myosin XVIIIa                                                                  | 64.50594 | 63.96097 | 60.01745 | 56.47851 | 66.98193 | 60.82785 |
| 17451251 | Myo18b  | myosin XVIIIb                                                                  | 7.56972  | 7.580011 | 6.953889 | 6.991781 | 8.032951 | 5.443219 |
| 17326105 | Myh15   | myosin, heavy chain 15                                                         | 2.522388 | 2.679883 | 2.855671 | 3.634684 | 2.997791 | 2.986819 |
| 17378395 | Myh7b   | myosin, heavy chain 7B, cardiac muscle, beta                                   | 6.746176 | 5.509342 | 7.046906 | 6.350939 | 5.660188 | 6.081006 |
| 17251046 | Myh1    | myosin, heavy polypeptide 1, skeletal muscle, adult                            | 5.074832 | 4.127476 | 2.837322 | 3.149887 | 3.640332 | 3.473283 |
| 17251370 | Myh10   | myosin, heavy polypeptide 10, non-muscle                                       | 21.21599 | 17.77084 | 25.04898 | 17.51076 | 16.6746  | 20.15352 |
| 17328368 | Myh11   | myosin, heavy polypeptide 11, smooth muscle                                    | 10.75242 | 11.50086 | 11.72048 | 11.50086 | 14.72484 | 11.48588 |
| 17251179 | Myh13   | myosin, heavy polypeptide 13, skeletal muscle                                  | 4.271136 | 3.67285  | 3.222499 | 3.614084 | 3.13147  | 5.479256 |
| 17490328 | Myh14   | myosin, heavy polypeptide 14                                                   | 20.10998 | 27.04687 | 30.66987 | 30.96271 | 25.97533 | 28.61362 |
| 17251001 | Myh2    | myosin, heavy polypeptide 2, skeletal muscle, adult                            | 6.006856 | 5.644908 | 5.072335 | 6.246595 | 3.980501 | 4.389449 |
| 17250958 | Myh3    | myosin, heavy polypeptide 3, skeletal muscle, embryonic                        | 4.136584 | 3.665881 | 3.343201 | 3.112751 | 3.138358 | 3.296054 |
| 17251091 | Myh4    | myosin, heavy polypeptide 4, skeletal muscle                                   | 3.815732 | 4.852136 | 3.620252 | 4.115221 | 3.451587 | 4.154803 |
| 17306532 | Myh6    | myosin, heavy polypeptide 6, cardiac muscle, alpha                             | 6.476166 | 6.640169 | 7.626547 | 5.651759 | 7.27799  | 6.798281 |
| 17306577 | Myh7    | myosin, heavy polypeptide 7, cardiac muscle, beta                              | 5.554511 | 7.316684 | 7.093118 | 7.165314 | 6.501443 | 7.524731 |
| 17251133 | Myh8    | myosin, heavy polypeptide 8, skeletal muscle, perinatal                        | 3.005198 | 2.710201 | 3.339703 | 3.222522 | 2.815459 | 3.41378  |
| 17318830 | Myh9    | myosin, heavy polypeptide 9, non-muscle                                        | 183.1142 | 203.0569 | 223.63   | 175.1698 | 234.924  | 177.1687 |
| 17443451 | Myl10   | myosin, light chain 10, regulatory                                             | 10.1837  | 13.5845  | 6.451569 | 12.4643  | 13.39293 | 15.01945 |
| 17346964 | Myl12a  | myosin, light chain 12A, regulatory, non-sarcomeric                            | 5.823716 | 8.467112 | 5.617429 | 5.050898 | 6.452508 | 4.886969 |
| 17346956 | Myl12b  | myosin, light chain 12B, regulatory                                            | 123.9591 | 134.0279 | 140.8602 | 123.2992 | 112.0478 | 115.4945 |
| 17223916 | Myl1    | myosin, light polypeptide 1                                                    | 4.25176  | 4.217038 | 3.672086 | 4.429028 | 3.904912 | 4.90754  |
| 17442010 | Myl2    | myosin, light polypeptide 2, regulatory, cardiac, slow                         | 8.497509 | 8.779568 | 8.636819 | 7.193431 | 8.136171 | 8.257643 |
| 17522439 | Myl3    | myosin, light polypeptide 3                                                    | 8.172854 | 8.702259 | 8.207142 | 8.001442 | 8.907558 | 8.885605 |
| 17257221 | Myl4    | myosin, light polypeptide 4                                                    | 8.640891 | 5.199958 | 6.832057 | 5.619065 | 6.96962  | 6.87953  |
| 17246146 | Myl6    | myosin, light polypeptide 6, alkali, smooth muscle and non-muscle              | 8.189356 | 10.43226 | 11.74496 | 11.61398 | 9.888009 | 7.422525 |
| 17246154 | Myl6b   | myosin, light polypeptide 6B                                                   | 9.328338 | 9.214399 | 8.057208 | 6.7635   | 6.992896 | 8.057208 |
| 17260236 | Myl7    | myosin, light polypeptide 7, regulatory                                        | 4.876784 | 5.100151 | 4.574646 | 4.480718 | 6.991684 | 5.749235 |
| 17378663 | Myl9    | myosin, light polypeptide 9, regulatory                                        | 17.5325  | 27.29548 | 28.14253 | 24.85131 | 19.75204 | 23.06015 |
| 17325159 | Mylk    | myosin, light polypeptide kinase                                               | 58.73832 | 62.3285  | 49.51007 | 62.33541 | 52.87339 | 63.18718 |
| 17377816 | Mylk2   | myosin, light polypeptide kinase 2, skeletal muscle                            | 9.641315 | 10.05325 | 7.934669 | 10.28807 | 13.3078  | 13.69161 |
| 17212813 | Mstn    | myostatin                                                                      | 2.90589  | 2.251974 | 2.562372 | 4.237108 | 2.811929 | 2.563989 |
| 17350267 | Myot    | myotilin                                                                       | 4.849312 | 3.713733 | 4.647678 | 5.168193 | 5.189552 | 4.016086 |
| 17465830 | Mtpn    | myotrophin                                                                     | 220.1144 | 197.7316 | 178.874  | 185.5366 | 189.3787 | 195.9063 |
| 17535319 | Mtmr1   | myotubularin related protein 1                                                 | 76.17153 | 62.27063 | 52.53875 | 67.45905 | 64.20661 | 62.95679 |
| 17478864 | Mtmr10  | myotubularin related protein 10                                                | 77.14175 | 81.63184 | 58.69802 | 70.95045 | 80.53366 | 82.85059 |
| 17400486 | Mtmr11  | myotubularin related protein 11                                                | 5.331679 | 7.698994 | 15.9156  | 6.926085 | 6.992896 | 8.297634 |
| 17310432 | Mtmr12  | myotubularin related protein 12                                                | 26.67026 | 30.00186 | 33.60095 | 27.89201 | 24.3701  | 26.91186 |
| 17461554 | Mtmr14  | myotubularin related protein 14                                                | 31.41932 | 19.42873 | 24.19639 | 22.64028 | 20.96862 | 22.64028 |
| 17514691 | Mtmr2   | myotubularin related protein 2                                                 | 90.16902 | 70.55518 | 76.09449 | 80.46949 | 71.07006 | 67.43427 |
| 17259992 | Mtmr3   | myotubularin related protein 3                                                 | 62.19471 | 60.72295 | 67.70075 | 63.12633 | 56.5796  | 60.28888 |
| 17254776 | Mtmr4   | myotubularin related protein 4                                                 | 61.83192 | 40.60625 | 43.13509 | 48.19862 | 41.25051 | 42.07613 |
| 17301010 | Mtmr6   | myotubularin related protein 6                                                 | 51.20526 | 53.3579  | 61.04876 | 52.21383 | 54.30375 | 48.71452 |
| 17508885 | Mtmr7   | myotubularin related protein 7                                                 | 4.144362 | 4.801649 | 3.986244 | 3.855051 | 3.470251 | 4.592978 |
| 17307650 | Mtmr9   | myotubularin related protein 9                                                 | 79.17648 | 73.81387 | 75.05415 | 73.02507 | 57.63767 | 72.66657 |
| 17303874 | Myoz1   | myozenin 1                                                                     | 3.552759 | 3.327618 | 4.016893 | 3.876299 | 4.002746 | 3.855612 |
| 17410022 | Myoz2   | myozenin 2                                                                     | 3.286655 | 3.175404 | 2.751484 | 3.095173 | 4.127162 | 3.472826 |
| 17354599 | Myoz3   | myozenin 3                                                                     | 5.607042 | 8.070958 | 8.108303 | 7.156132 | 6.992896 | 7.12579  |
| 17240226 | Marcks  | myristoylated alanine rich protein kinase C substrate                          | 53.58993 | 59.41849 | 62.70854 | 50.12644 | 47.96998 | 56.1989  |
| 17418447 | Meaf6   | MYST/Esal-associated factor 6                                                  | 19.03431 | 18.96083 | 15.54598 | 18.90754 | 15.67963 | 22.1722  |
| 17542486 | Naa10   | N(alpha)-acetyltransferase 10, NatA catalytic subunit                          | 5.521422 | 4.203351 | 7.326631 | 5.417022 | 6.350763 | 5.039253 |
| 17449931 | Naa11   | N(alpha)-acetyltransferase 11, NatA catalytic subunit                          | 4.875229 | 5.149849 | 5.062781 | 5.808799 | 7.248035 | 5.753022 |
| 17397439 | Naa15   | N(alpha)-acetyltransferase 15, NatA auxiliary subunit                          | 96.35315 | 70.704   | 71.66665 | 74.31492 | 72.02071 | 73.12283 |
| 17308888 | Naa16   | N(alpha)-acetyltransferase 16, NatA auxiliary subunit                          | 33.73677 | 28.08407 | 23.78055 | 26.36112 | 25.06479 | 26.88538 |
| 17377199 | Naa20   | N(alpha)-acetyltransferase 20, NatB catalytic subunit                          | 14.87358 | 21.30204 | 25.25768 | 22.32828 | 22.19434 | 24.55968 |
| 17441895 | Naa25   | N(alpha)-acetyltransferase 25, NatB auxiliary subunit                          | 58.18236 | 67.97677 | 56.20747 | 82.21103 | 65.71679 | 64.39336 |
| 17299465 | Naa30   | N(alpha)-acetyltransferase 30, NatC catalytic subunit                          | 73.00129 | 60.50532 | 50.7199  | 64.20172 | 62.30647 | 60.01287 |
| 17287928 | Naa35   | N(alpha)-acetyltransferase 35, NatC auxiliary subunit                          | 61.74027 | 54.36288 | 46.27336 | 57.38374 | 57.16103 | 67.72281 |
| 17251643 | Naa38   | N(alpha)-acetyltransferase 38, NatC auxiliary subunit                          | 56.19267 | 53.69627 | 51.71819 | 54.63146 | 57.50359 | 52.60835 |
| 17362279 | Naa40   | N(alpha)-acetyltransferase 40, NatD catalytic subunit, homolog (S. cerevisiae) | 27.13776 | 23.51338 | 22.35739 | 26.55497 | 26.62778 | 30.59958 |
| 17325761 | Naa50   | N(alpha)-acetyltransferase 50, NatE catalytic subunit                          | 174.4041 | 173.2474 | 148.5722 | 145.2103 | 152.4128 | 153.4591 |
| 17322476 | Naa60   | N(alpha)-acetyltransferase 60, NatF catalytic subunit                          | 123.681  | 108.6655 | 113.6143 | 95.59147 | 90.39932 | 96.38455 |
| 17326846 | N6amt1  | N-6 adenine-specific DNA methyltransferase 1 (putative)                        | 12.08596 | 12.08596 | 14.63388 | 12.40483 | 12.87321 | 12.39056 |
| 17307151 | N6amt2  | N-6 adenine-specific DNA methyltransferase 2 (putative)                        | 22.66682 | 22.62789 | 22.42786 | 26.36112 | 18.54425 | 18.29681 |
| 17430645 | Nkain1  | Na+/K+ transporting ATPase interacting 1                                       | 6.880484 | 5.592952 | 5.749594 | 7.592211 | 5.69178  | 7.268361 |
| 17240109 | Nkain2  | Na+/K+ transporting ATPase interacting 2                                       | 6.2537   | 7.000025 | 5.210277 | 5.980682 | 5.87187  | 5.843003 |
| 17423601 | Nkain3  | Na+/K+ transporting ATPase interacting 3                                       | 7.750772 | 5.098066 | 5.386134 | 5.386134 | 7.824833 | 5.2288   |
| 17395707 | Nkain4  | Na+/K+ transporting ATPase interacting 4                                       | 11.89992 | 12.99712 | 12.13582 | 13.79449 | 11.7243  | 13.66733 |
| 17260406 | Nacad   | NAC alpha domain containing                                                    | 6.460116 | 12.63978 | 11.56746 | 10.3293  | 11.56746 | 9.798698 |
| 17319607 | Naga    | N-acetyl galactosaminidase, alpha                                              | 53.40119 | 58.82796 | 57.31656 | 58.19648 | 60.48351 | 63.93305 |
| 17501565 | Nat1    | N-acetyl transferase 1                                                         | 2.63918  | 2.96662  | 3.486115 | 2.969335 | 3.191976 | 3.187952 |
| 17524264 | Naalad2 | N-acetylated alpha-linked acidic dipeptidase 2                                 | 4.517705 | 5.661483 | 4.063069 | 4.941949 | 5.173318 | 5.050758 |
| 17356642 | Naalad1 | N-acetylated alpha-linked acidic dipeptidase-like 1                            | 4.441971 | 5.780603 | 5.602614 | 6.824342 | 5.26298  | 4.802914 |
| 17404373 | Naalad2 | N-acetylated alpha-linked acidic dipeptidase-like 2                            | 21.06258 | 24.36114 | 18.49649 | 20.12532 | 17.44437 | 27.47676 |
| 17460133 | Nagk    | N-acetylglucosamine kinase                                                     | 18.43876 | 19.20873 | 18.53564 | 19.44223 | 16.37996 | 18.60167 |
| 17236339 | Gnptab  | N-acetylglucosamine-1-phosphate transferase, alpha and beta subunits           | 23.41011 | 25.97425 | 25.27466 | 33.84615 | 26.85465 | 26.59937 |
| 17327934 | Nagpa   | N-acetylglucosamine-1-phosphodiester alpha-N-acetylglucosaminidase             | 28.61183 | 30.14883 | 27.92954 | 26.54816 | 26.06009 | 33.26516 |
| 17342167 | Gnptg   | N-acetylglucosamine-1-phosphotransferase, gamma subunit                        | 52.88585 | 53.34718 | 63.73438 | 57.41119 | 64.70162 | 60.37293 |
| 17256882 | Nags    | N-acetylglutamate synthase                                                     | 97.40406 | 88.64762 | 88.50027 | 101.7377 | 95.26009 | 95.9526  |

|          |               |                                                                       |          |          |          |          |          |          |
|----------|---------------|-----------------------------------------------------------------------|----------|----------|----------|----------|----------|----------|
| 17228234 | Npl           | N-acetylneuraminate pyruvate lyase                                    | 21.16121 | 15.90799 | 17.07768 | 15.90799 | 13.19812 | 17.61497 |
| 17392780 | Nanp          | N-acetylneuraminic acid phosphatase                                   | 6.941272 | 6.648874 | 8.00649  | 7.725402 | 7.097741 | 7.373093 |
| 17413832 | Nans          | N-acetylneuraminic acid synthase (sialic acid synthase)               | 19.63833 | 15.38732 | 10.9497  | 15.52681 | 14.71097 | 14.99303 |
| 17388821 | Nat10         | N-acetyltransferase 10                                                | 32.6964  | 36.01086 | 32.10531 | 36.74637 | 28.45401 | 33.47077 |
| 17473417 | Nat14         | N-acetyltransferase 14                                                | 7.226965 | 9.086911 | 7.703585 | 4.470791 | 7.235386 | 7.235386 |
| 17501569 | Nat2          | N-acetyltransferase 2 (arylamine N-acetyltransferase)                 | 21.63282 | 17.09864 | 16.76883 | 19.04315 | 21.31475 | 21.97163 |
| 17501574 | Nat3          | N-acetyltransferase 3                                                 | 3.787485 | 3.877992 | 3.589368 | 3.207546 | 4.352065 | 3.787485 |
| 17521441 | Nat6          | N-acetyltransferase 6                                                 | 77.46324 | 106.8513 | 147.6728 | 99.12314 | 76.05546 | 93.17235 |
| 17468438 | Nat8          | N-acetyltransferase 8 (GCN5-related, putative)                        | 4.77073  | 4.468374 | 2.67402  | 4.858968 | 3.048818 | 3.253742 |
| 17468467 | Nat8b         | N-acetyltransferase 8B [Source:MGI Symbol;Acc:MGI:3644831]            | 15.06898 | 10.07928 | 13.08779 | 11.50405 | 9.155889 | 10.29227 |
| 17436545 | Nat8l         | N-acetyltransferase 8-like                                            | 5.074023 | 6.139325 | 5.40858  | 6.338537 | 6.154066 | 6.054593 |
| 17271789 | Nat9          | N-acetyltransferase 9 (GCN5-related, putative)                        | 18.29516 | 15.30509 | 17.87424 | 20.74541 | 22.55632 | 21.90837 |
| 17263698 | Natd1         | N-acetyltransferase domain containing 1                               | 26.48842 | 26.66989 | 22.89626 | 28.62254 | 28.54666 | 26.76118 |
| 17502470 | Nwd1          | NACHT and WD repeat domain containing 1                               | 5.937806 | 6.638328 | 6.701621 | 7.104288 | 7.495008 | 6.480836 |
| 17437585 | Nwd2          | NACHT and WD repeat domain containing 2                               | 3.945286 | 4.384645 | 3.600232 | 3.076479 | 2.93325  | 3.755123 |
| 17445860 | Napepld       | N-acyl phosphatidylethanolamine phospholipase D                       | 9.915393 | 6.481016 | 8.860327 | 6.391436 | 6.677    | 6.303006 |
| 17449673 | Naaa          | N-acyl ethanolamine acid amidase                                      | 19.36608 | 19.77328 | 20.71121 | 18.20799 | 17.50312 | 21.39127 |
| 17508949 | Asah1         | N-acylsphingosine amidohydrolase 1                                    | 77.24341 | 80.10442 | 82.55937 | 64.93255 | 68.47142 | 71.1292  |
| 17363927 | Asah2         | N-acylsphingosine amidohydrolase 2                                    | 66.36129 | 86.01283 | 75.09682 | 79.00105 | 63.09615 | 72.2362  |
| 17422587 | Nadk          | NAD kinase                                                            | 187.451  | 205.2801 | 209.6327 | 197.4002 | 162.7925 | 183.2044 |
| 17310187 | Nadk2         | NAD kinase 2, mitochondrial                                           | 252.5456 | 220.1541 | 202.6744 | 232.5698 | 229.0296 | 258.5608 |
| 17498370 | Nadsyn1       | NAD synthetase 1                                                      | 21.90077 | 23.34789 | 19.14479 | 23.04577 | 23.34789 | 23.34789 |
| 17535434 | Nsdhl         | NAD(P) dependent steroid dehydrogenase-like                           | 126.9459 | 108.903  | 127.286  | 118.393  | 164.503  | 117.6217 |
| 17512732 | Nqo1          | NAD(P)H dehydrogenase, quinone 1                                      | 35.87955 | 39.40454 | 42.72327 | 39.07787 | 38.62786 | 33.67299 |
| 17286462 | Nqo2          | NAD(P)H dehydrogenase, quinone 2                                      | 99.6688  | 103.0828 | 84.46665 | 100.9859 | 86.40483 | 123.3505 |
| 17225564 | Ndufa10       | NADH dehydrogenase (ubiquinone) 1 alpha subcomplex 10                 | 321.6148 | 321.3764 | 293.9201 | 310.5281 | 319.3512 | 324.4495 |
| 17338872 | Ndufa11       | NADH dehydrogenase (ubiquinone) 1 alpha subcomplex 11                 | 14.80138 | 21.41975 | 22.26692 | 19.37709 | 21.6045  | 17.91716 |
| 17339864 | Ndufa7        | NADH dehydrogenase (ubiquinone) 1 alpha subcomplex assembly factor 7  | 52.57664 | 46.97691 | 56.85006 | 59.52072 | 40.9213  | 51.27522 |
| 17541036 | Ndufa1        | NADH dehydrogenase (ubiquinone) 1 alpha subcomplex, 1                 | 111.884  | 126.6919 | 137.3983 | 147.0222 | 172.6624 | 142.6484 |
| 17236681 | Ndufa12       | NADH dehydrogenase (ubiquinone) 1 alpha subcomplex, 12                | 69.78234 | 74.79034 | 74.79034 | 76.56589 | 76.07181 | 82.90344 |
| 17509891 | Ndufa13       | NADH dehydrogenase (ubiquinone) 1 alpha subcomplex, 13                | 11.82436 | 12.51599 | 12.64671 | 14.25781 | 11.74203 | 10.81191 |
| 17509899 | Ndufa13       | NADH dehydrogenase (ubiquinone) 1 alpha subcomplex, 13                | 178.7191 | 175.504  | 183.3123 | 201.0499 | 188.4947 | 199.5228 |
| 17353752 | Ndufa2        | NADH dehydrogenase (ubiquinone) 1 alpha subcomplex, 2                 | 98.34979 | 92.49478 | 99.19668 | 111.7701 | 125.371  | 118.0161 |
| 17473171 | Ndufa3        | NADH dehydrogenase (ubiquinone) 1 alpha subcomplex, 3                 | 244.2949 | 319.1365 | 299.8464 | 295.8209 | 298.7759 | 276.8921 |
| 17464836 | Ndufa4        | NADH dehydrogenase (ubiquinone) 1 alpha subcomplex, 4                 | 716.5433 | 732.919  | 657.5287 | 732.5635 | 771.4987 | 854.8219 |
| 17238054 | Ndufa4l2      | NADH dehydrogenase (ubiquinone) 1 alpha subcomplex, 4-like 2          | 7.708873 | 11.28841 | 16.16565 | 9.89315  | 25.72929 | 11.72893 |
| 17465201 | Ndufa5        | NADH dehydrogenase (ubiquinone) 1 alpha subcomplex, 5                 | 32.5747  | 47.59176 | 36.7059  | 44.83489 | 53.88344 | 52.05374 |
| 17319619 | Ndufa6        | NADH dehydrogenase (ubiquinone) 1 alpha subcomplex, 6 (B14)           | 167.5073 | 204.8366 | 204.9616 | 236.381  | 232.3281 | 260.1085 |
| 17336190 | Ndufa7        | NADH dehydrogenase (ubiquinone) 1 alpha subcomplex, 7 (B14.5a)        | 42.9942  | 35.36107 | 37.83134 | 36.31113 | 38.61582 | 37.0071  |
| 17384525 | Ndufa8        | NADH dehydrogenase (ubiquinone) 1 alpha subcomplex, 8                 | 182.5351 | 241.4181 | 283.6288 | 237.3973 | 236.0895 | 237.3973 |
| 17471166 | Ndufa9        | NADH dehydrogenase (ubiquinone) 1 alpha subcomplex, 9                 | 205.6276 | 198.2161 | 195.3016 | 209.8522 | 208.3565 | 220.0595 |
| 17389928 | Ndufaf1       | NADH dehydrogenase (ubiquinone) 1 alpha subcomplex, assembly factor 1 | 61.60861 | 59.71494 | 58.40419 | 62.92014 | 55.29243 | 61.30233 |
| 17296104 | Ndufaf2       | NADH dehydrogenase (ubiquinone) 1 alpha subcomplex, assembly factor 2 | 12.59405 | 15.75109 | 14.26977 | 11.50086 | 15.38337 | 16.94949 |
| 17531207 | Ndufaf3       | NADH dehydrogenase (ubiquinone) 1 alpha subcomplex, assembly factor 3 | 44.65222 | 33.53487 | 37.34699 | 45.39873 | 35.89448 | 37.82007 |
| 17412272 | Ndufaf4       | NADH dehydrogenase (ubiquinone) 1 alpha subcomplex, assembly factor 4 | 69.91112 | 57.16301 | 56.99763 | 69.50284 | 51.68522 | 56.30378 |
| 17213179 | Ndufb3        | NADH dehydrogenase (ubiquinone) 1 beta subcomplex 3                   | 28.90826 | 32.26616 | 36.32775 | 30.88833 | 29.93684 | 35.98241 |
| 17330314 | Ndufb4        | NADH dehydrogenase (ubiquinone) 1 beta subcomplex 4                   | 44.85447 | 46.66827 | 41.79707 | 43.66726 | 39.01021 | 42.93791 |
| 17365134 | Ndufb8        | NADH dehydrogenase (ubiquinone) 1 beta subcomplex 8                   | 44.6742  | 37.92744 | 38.74749 | 40.77435 | 40.57277 | 47.15471 |
| 17475861 | 1700028B04Rik | NADH dehydrogenase (ubiquinone) 1 beta subcomplex 8 pseudogene        | 13.66658 | 13.06568 | 8.467112 | 13.39423 | 12.35189 | 13.792   |
| 17342029 | Ndufb10       | NADH dehydrogenase (ubiquinone) 1 beta subcomplex, 10                 | 58.93325 | 68.21703 | 73.09699 | 77.16528 | 60.37042 | 84.38765 |
| 17540490 | Ndufb11       | NADH dehydrogenase (ubiquinone) 1 beta subcomplex, 11                 | 11.74455 | 11.04951 | 10.18991 | 12.35189 | 11.46934 | 11.74455 |
| 17457540 | Ndufb2        | NADH dehydrogenase (ubiquinone) 1 beta subcomplex, 2                  | 34.00889 | 31.89437 | 28.99797 | 34.20582 | 39.24372 | 38.32835 |
| 17396750 | Ndufb5        | NADH dehydrogenase (ubiquinone) 1 beta subcomplex, 5                  | 76.47626 | 58.0772  | 63.80422 | 67.95369 | 64.21551 | 75.19266 |
| 17424023 | Ndufb6        | NADH dehydrogenase (ubiquinone) 1 beta subcomplex, 6                  | 95.61864 | 88.97388 | 91.46133 | 108.0361 | 98.70081 | 107.0737 |
| 17502944 | Ndufb7        | NADH dehydrogenase (ubiquinone) 1 beta subcomplex, 7                  | 42.89091 | 43.59649 | 50.44048 | 52.28844 | 53.369   | 55.45286 |
| 17311796 | Ndufb9        | NADH dehydrogenase (ubiquinone) 1 beta subcomplex, 9                  | 986.6195 | 967.9509 | 940.6407 | 926.3605 | 875.9411 | 933.4442 |
| 17495921 | Ndufab1       | NADH dehydrogenase (ubiquinone) 1, alpha/beta subcomplex, 1           | 37.00504 | 38.00507 | 36.6825  | 35.6945  | 29.22113 | 34.27489 |
| 17405133 | Ndufc1        | NADH dehydrogenase (ubiquinone) 1, subcomplex unknown, 1              | 84.52405 | 95.03651 | 95.03651 | 95.03651 | 95.03651 | 93.65863 |
| 17480343 | Ndufc2        | NADH dehydrogenase (ubiquinone) 1, subcomplex unknown, 2              | 241.7614 | 228.9153 | 214.327  | 258.6666 | 228.7598 | 287.0106 |
| 17376917 | Ndufaf5       | NADH dehydrogenase (ubiquinone) complex 1, assembly factor 5          | 8.230385 | 6.103387 | 6.55661  | 9.009019 | 6.497479 | 7.423605 |
| 17423215 | Ndufaf6       | NADH dehydrogenase (ubiquinone) complex 1, assembly factor 6          | 24.97876 | 21.28861 | 23.11696 | 24.41236 | 19.18065 | 26.17776 |
| 17223685 | Ndufs1        | NADH dehydrogenase (ubiquinone) Fe-S protein 1                        | 175.6951 | 168.5508 | 166.3191 | 186.1936 | 154.9813 | 192.9843 |
| 17229665 | Ndufs2        | NADH dehydrogenase (ubiquinone) Fe-S protein 2                        | 231.5982 | 243.7942 | 224.8283 | 245.4151 | 220.3037 | 256.277  |
| 17388074 | Ndufs3        | NADH dehydrogenase (ubiquinone) Fe-S protein 3                        | 33.33348 | 34.47551 | 30.70347 | 34.27988 | 34.27988 | 35.19918 |
| 17296336 | Ndufs4        | NADH dehydrogenase (ubiquinone) Fe-S protein 4                        | 84.70058 | 93.9662  | 95.25745 | 92.38073 | 90.98394 | 95.29443 |
| 17429803 | Ndufs5        | NADH dehydrogenase (ubiquinone) Fe-S protein 5                        | 3.727969 | 3.501881 | 3.458652 | 3.924231 | 3.517401 | 2.903675 |
| 17294235 | Ndufs6        | NADH dehydrogenase (ubiquinone) Fe-S protein 6                        | 39.21028 | 48.18693 | 50.71674 | 46.11806 | 49.39387 | 47.30825 |
| 17235268 | Ndufs7        | NADH dehydrogenase (ubiquinone) Fe-S protein 7                        | 195.6037 | 208.4215 | 203.4697 | 203.5416 | 176.8276 | 204.3219 |
| 17361032 | Ndufs8        | NADH dehydrogenase (ubiquinone) Fe-S protein 8                        | 188.4072 | 143.7592 | 149.1851 | 154.3434 | 147.4774 | 144.6618 |
| 17361056 | Ndufv1        | NADH dehydrogenase (ubiquinone) flavoprotein 1                        | 210.5691 | 194.7528 | 193.9297 | 213.3547 | 193.086  | 205.6076 |
| 17346802 | Ndufv2        | NADH dehydrogenase (ubiquinone) flavoprotein 2                        | 159.8993 | 153.7508 | 144.4414 | 177.0545 | 160.559  | 191.1922 |
| 17335865 | Ndufv3        | NADH dehydrogenase (ubiquinone) flavoprotein 3                        | 40.92385 | 38.55778 | 51.09428 | 45.44092 | 41.57228 | 49.25506 |
| 17325719 | BC002163      | NADH dehydrogenase Fe-S protein 5 pseudogene                          | 104.2974 | 80.77517 | 86.08978 | 95.66836 | 85.64458 | 89.09669 |
| 17532603 | ND1           | NADH dehydrogenase subunit 1                                          | 5689.831 | 5940.835 | 5776.981 | 5776.981 | 5770.498 | 5872.992 |
| 17532607 | ND2           | NADH dehydrogenase subunit 2                                          | 5434.72  | 5677.342 | 5454.042 | 5432.498 | 5227.915 | 5504.02  |
| 17532621 | ND3           | NADH dehydrogenase subunit 3                                          | 4715.091 | 5008.698 | 5165.205 | 5013.387 | 4850.171 | 5148.977 |
| 17532625 | ND4           | NADH dehydrogenase subunit 4                                          | 7163.555 | 7322.142 | 7111.608 | 7260.484 | 7120.141 | 7374.86  |
| 17221871 | ND4L          | NADH dehydrogenase subunit 4L                                         | 5387.648 | 5328.708 | 5184.036 | 5378.805 | 5203.26  | 5396.731 |
| 17532631 | ND5           | NADH dehydrogenase subunit 5                                          | 6547.734 | 6731.909 | 6316.107 | 6431.591 | 6398.021 | 6592.911 |
| 17532649 | ND6           | NADH dehydrogenase subunit 6                                          | 1007.637 | 1253.964 | 1384.05  | 1218.128 | 1313.654 | 1328.323 |
| 17282828 | Noxred1       | NADP+ dependent oxidoreductase domain containing 1                    | 7.218905 | 5.741071 | 5.418261 | 6.785758 | 4.625919 | 5.443634 |
| 17382459 | Ndor1         | NADPH dependent diflavin oxidoreductase 1                             | 29.00239 | 26.45099 | 23.60744 | 31.63786 | 25.39583 | 20.50622 |
| 17544424 | Nox1          | NADPH oxidase 1                                                       | 3.39874  | 3.366175 | 3.479162 | 3.280351 | 3.594921 | 3.237741 |
| 17340458 | Nox3          | NADPH oxidase 3                                                       | 5.671892 | 6.492572 | 6.037662 | 8.688578 | 5.480699 | 6.958855 |

|          |               |                                                                              |          |          |          |          |          |          |
|----------|---------------|------------------------------------------------------------------------------|----------|----------|----------|----------|----------|----------|
| 17479974 | Nox4          | NADPH oxidase 4                                                              | 57.99393 | 32.31451 | 18.70588 | 39.67697 | 49.19603 | 38.62786 |
| 17382363 | Noxa1         | NADPH oxidase activator 1                                                    | 6.519675 | 6.113252 | 6.168287 | 6.212139 | 6.603816 | 6.704315 |
| 17334381 | Noxo1         | NADPH oxidase organizer 1                                                    | 7.778705 | 7.778705 | 7.778705 | 10.44673 | 7.329222 | 7.778705 |
| 17503650 | Nkd1          | naked cuticle 1 homolog (Drosophila)                                         | 15.47342 | 13.96071 | 16.77569 | 14.39325 | 13.64462 | 14.35449 |
| 17294289 | Nkd2          | naked cuticle 2 homolog (Drosophila)                                         | 9.749917 | 11.03015 | 11.06691 | 10.48722 | 8.311276 | 11.30195 |
| 17545824 | Nhs           | Nance-Horan syndrome (human)                                                 | 4.851901 | 4.700942 | 4.584327 | 4.50957  | 6.108211 | 4.386834 |
| 17462694 | Nanog         | Nanog homeobox                                                               | 3.753353 | 4.577976 | 4.208949 | 4.147667 | 3.880493 | 3.998669 |
| 17360873 | Nanos1        | nanos homolog 1 (Drosophila)                                                 | 14.64676 | 13.08734 | 11.88879 | 11.16832 | 9.201697 | 11.02709 |
| 17474385 | Nanos2        | nanos homolog 2 (Drosophila)                                                 | 4.475783 | 4.392919 | 4.232265 | 4.592883 | 3.613157 | 4.399715 |
| 17511069 | Nanos3        | nanos homolog 3 (Drosophila)                                                 | 5.394839 | 5.079653 | 5.788863 | 4.639277 | 4.340376 | 5.531804 |
| 17477508 | Napsa         | napsin A aspartic peptidase                                                  | 5.053875 | 5.385835 | 4.786928 | 4.864967 | 4.786762 | 3.823304 |
| 17416773 | Nrd1          | nardilysin, N-arginine dibasic convertase, NRD convertase 1                  | 143.9027 | 135.2317 | 136.2205 | 136.5097 | 142.2594 | 137.69   |
| 17238226 | Naca          | nascent polypeptide-associated complex alpha polypeptide                     | 289.8314 | 284.7792 | 328.095  | 289.6004 | 315.4986 | 320.0204 |
| 17407306 | Npr1          | natriuretic peptide receptor 1                                               | 22.96349 | 14.75958 | 15.87451 | 16.36668 | 15.26229 | 17.36788 |
| 17413403 | Npr2          | natriuretic peptide receptor 2                                               | 60.35662 | 49.92152 | 54.1185  | 73.63961 | 53.48639 | 52.00001 |
| 17316043 | Npr3          | natriuretic peptide receptor 3                                               | 8.428115 | 11.12914 | 9.344193 | 11.24171 | 9.456983 | 8.139612 |
| 17421545 | Nppa          | natriuretic peptide type A                                                   | 8.679669 | 7.450256 | 7.008278 | 8.51685  | 9.326657 | 9.888077 |
| 17421540 | Nppb          | natriuretic peptide type B                                                   | 7.177742 | 4.988341 | 5.683935 | 6.085771 | 5.287919 | 5.882625 |
| 17225191 | Nppc          | natriuretic peptide type C                                                   | 9.73189  | 11.71577 | 11.41208 | 10.28807 | 9.788311 | 12.85003 |
| 17473300 | Ncr1          | natural cytotoxicity triggering receptor 1                                   | 3.972563 | 6.781009 | 4.923178 | 6.970345 | 6.767533 | 4.994014 |
| 17477101 | Nkg7          | natural killer cell group 7 sequence                                         | 10.52976 | 9.832444 | 10.29399 | 10.72778 | 9.310251 | 9.466493 |
| 17523332 | Nktr          | natural killer tumor recognition sequence                                    | 37.17189 | 35.69673 | 35.36107 | 40.47586 | 37.877   | 33.30992 |
| 17315570 | Nckap1l       | NCK associated protein 1 like                                                | 23.69449 | 35.92908 | 35.95723 | 27.88776 | 26.08123 | 24.68033 |
| 17521917 | Nckipsd       | NCK interacting protein with SH3 domain                                      | 17.25449 | 19.4708  | 24.76464 | 14.00772 | 14.48271 | 18.04854 |
| 17387316 | Nckap1        | NCK-associated protein 1                                                     | 235.8948 | 238.4826 | 227.0223 | 238.8266 | 222.8918 | 235.5811 |
| 17226447 | Nckap5        | NCK-associated protein 5                                                     | 4.947021 | 4.801649 | 5.049743 | 4.97515  | 4.384523 | 4.10488  |
| 17321561 | Nckap5l       | NCK-associated protein 5-like                                                | 12.98577 | 12.65609 | 12.93071 | 13.07909 | 13.96874 | 12.65469 |
| 17416481 | Ndc1          | NDC1 transmembrane nucleoporin                                               | 22.64264 | 19.0384  | 18.24096 | 20.33143 | 19.83147 | 19.19262 |
| 17347042 | Ndc80         | NDC80 homolog, kinetochore complex component (S. cerevisiae)                 | 5.482941 | 5.000838 | 6.245772 | 3.703322 | 6.223603 | 6.31998  |
| 17340411 | 2700099C18Rik | NDC80 homolog, kinetochore complex component pseudogene                      | 4.676081 | 3.568629 | 2.887398 | 4.259576 | 4.114309 | 4.533766 |
| 17354629 | Ndst1         | N-deacetylase/N-sulfotransferase (heparan glucosaminyl) 1                    | 147.4498 | 158.3958 | 165.5531 | 154.7612 | 142.3827 | 147.3732 |
| 17303897 | Ndst2         | N-deacetylase/N-sulfotransferase (heparan glucosaminyl) 2                    | 28.11757 | 25.72805 | 26.42021 | 26.64476 | 29.14426 | 28.20052 |
| 17410067 | Ndst3         | N-deacetylase/N-sulfotransferase (heparan glucosaminyl) 3                    | 4.397642 | 3.334291 | 3.995123 | 5.200715 | 5.173892 | 3.726574 |
| 17402412 | Ndst4         | N-deacetylase/N-sulfotransferase (heparin glucosaminyl) 4                    | 2.318787 | 2.604434 | 2.477577 | 2.909699 | 2.691182 | 2.773985 |
| 17381940 | Nebi          | nebulette                                                                    | 3.925401 | 4.42234  | 4.20927  | 3.944821 | 4.20927  | 4.20927  |
| 17385099 | Neb           | nebulin                                                                      | 20.64757 | 23.15433 | 21.25441 | 29.9605  | 51.37662 | 30.00789 |
| 17365803 | Nrap          | nebulin-related anchoring protein                                            | 4.636416 | 4.409974 | 4.966949 | 4.859002 | 5.048063 | 4.931751 |
| 17462719 | Necap1        | NECAP endocytosis associated 1                                               | 135.3555 | 128.9118 | 139.8649 | 130.1318 | 140.5442 | 146.7493 |
| 17432124 | Necap2        | NECAP endocytosis associated 2                                               | 47.93043 | 46.77546 | 48.87653 | 44.81811 | 40.15729 | 38.32994 |
| 17478789 | Ndn           | nedcin                                                                       | 5.377703 | 7.111136 | 5.592642 | 6.186056 | 4.830625 | 5.518935 |
| 17491846 | Ndnl2         | nedcin-like 2                                                                | 33.8539  | 30.20049 | 29.31282 | 30.75822 | 31.86631 | 28.4923  |
| 17511453 | N4bp1         | NEDD4 binding protein 1                                                      | 30.21808 | 31.73318 | 39.30552 | 27.8924  | 30.865   | 29.76118 |
| 17437803 | N4bp2         | NEDD4 binding protein 2                                                      | 44.2664  | 40.38199 | 34.73384 | 43.13479 | 40.30173 | 52.96546 |
| 17448369 | N4bp2os       | NEDD4 binding protein 2, opposite strand [Source:MGI Symbol;Acc:MGI:1921484] | 6.001445 | 6.318973 | 5.788341 | 5.926499 | 7.74143  | 5.27357  |
| 17455554 | N4bp2l1       | NEDD4 binding protein 2-like 1                                               | 64.09589 | 98.448   | 80.81941 | 101.0643 | 124.9459 | 114.4275 |
| 17455562 | N4bp2l2       | NEDD4 binding protein 2-like 2                                               | 70.34666 | 67.7322  | 46.18172 | 57.66804 | 58.10579 | 63.38546 |
| 17262506 | N4bp3         | NEDD4 binding protein 3                                                      | 14.90971 | 15.51875 | 15.36142 | 16.81515 | 15.17011 | 15.83385 |
| 17350011 | Ndfip1        | Nedd4 family interacting protein 1                                           | 224.819  | 203.0949 | 185.304  | 195.1555 | 159.2788 | 213.3754 |
| 17302550 | Ndfip2        | Nedd4 family interacting protein 2                                           | 60.94813 | 64.02795 | 64.02795 | 60.74695 | 67.9066  | 66.10466 |
| 17512275 | Nae1          | NEDD8 activating enzyme E1 subunit 1                                         | 45.10952 | 39.13208 | 36.32019 | 40.97352 | 43.00642 | 42.16547 |
| 17447170 | Nelfa         | negative elongation factor complex member A, Whsc2                           | 42.24885 | 41.0964  | 39.97151 | 36.30182 | 36.8944  | 40.74949 |
| 17382392 | Nelfb         | negative elongation factor complex member B                                  | 39.42968 | 33.63427 | 32.36786 | 34.60959 | 33.98014 | 25.01983 |
| 17380340 | Nelfcd        | negative elongation factor complex member C/D, Th1l                          | 46.88128 | 37.27897 | 41.09098 | 36.77542 | 38.77191 | 43.87417 |
| 17336738 | Nelfe         | negative elongation factor complex member E, Rdbp                            | 38.6201  | 35.90368 | 30.15865 | 46.43047 | 35.89448 | 32.72089 |
| 17329819 | Nrros         | negative regulator of reactive oxygen species                                | 11.40386 | 12.03263 | 13.39423 | 11.26191 | 13.43198 | 10.28778 |
| 17435422 | Nub1          | negative regulator of ubiquitin-like proteins 1                              | 59.57644 | 65.38419 | 58.31318 | 63.46459 | 59.72984 | 71.52323 |
| 17527481 | Nei1          | nei endonuclease VIII-like 1 (E. coli)                                       | 14.57749 | 13.37067 | 13.37067 | 14.49045 | 11.04269 | 11.69695 |
| 17307598 | Nei2          | nei like 2 (E. coli)                                                         | 10.67778 | 11.63033 | 10.72986 | 9.888557 | 9.399409 | 10.71946 |
| 17509361 | Nei3          | nei like 3 (E. coli)                                                         | 7.112171 | 8.250491 | 6.929734 | 6.864478 | 6.762609 | 7.215953 |
| 17256754 | Nbr1          | neighbor of Brca1 gene 1                                                     | 281.6813 | 255.3567 | 250.3374 | 273.6523 | 271.6321 | 277.4108 |
| 17478406 | Nell1         | NEL-like 1                                                                   | 4.377509 | 4.551367 | 4.653674 | 4.633107 | 4.025115 | 4.265131 |
| 17491406 | Nell1os       | NEL-like 1, opposite strand                                                  | 4.130596 | 3.654946 | 3.958489 | 4.337429 | 3.914125 | 4.526983 |
| 17320813 | Nell2         | NEL-like 2                                                                   | 4.664136 | 5.391101 | 5.374386 | 4.664654 | 4.420808 | 5.429352 |
| 17266498 | Nlk           | nemo like kinase                                                             | 40.95705 | 36.31466 | 44.6807  | 34.52358 | 30.39222 | 35.15018 |
| 17527735 | Neo1          | neogenin                                                                     | 34.97034 | 35.52419 | 34.96792 | 34.86578 | 31.88995 | 30.37474 |
| 17465733 | Npn2          | neoplastic progression 2                                                     | 3.055101 | 2.794713 | 3.659001 | 3.068195 | 4.219085 | 3.299735 |
| 17311519 | Nov           | nephroblastoma overexpressed gene                                            | 5.735702 | 5.735702 | 5.225467 | 5.735702 | 5.596093 | 5.704854 |
| 17233286 | Nepn          | nephrocan                                                                    | 3.603128 | 3.536176 | 3.11301  | 3.354063 | 3.644094 | 2.749635 |
| 17410435 | Npnt          | nephronectin                                                                 | 9.95858  | 11.2393  | 9.220212 | 9.888214 | 7.93027  | 8.878217 |
| 17391347 | Nphp1         | nephronophthisis 1 (juvenile) homolog (human)                                | 15.33291 | 14.15834 | 17.28705 | 16.31944 | 11.55135 | 10.26271 |
| 17520983 | Nphp3         | nephronophthisis 3 (adolescent)                                              | 9.767437 | 7.927137 | 7.614873 | 9.733104 | 10.166   | 10.14101 |
| 17422218 | Nphp4         | nephronophthisis 4 (juvenile) homolog (human)                                | 6.379441 | 5.598188 | 4.937771 | 5.486857 | 5.726128 | 4.925568 |
| 17489094 | Nphs1os       | nephrosis 1 homolog, nephrin, opposite strand                                | 4.681043 | 4.30905  | 4.255976 | 5.132103 | 4.416214 | 4.482955 |
| 17476389 | Nphs1         | nephrosis 1, nephrin                                                         | 6.317352 | 7.714753 | 7.433337 | 8.40781  | 7.9189   | 7.574602 |
| 17218412 | Nphs2         | nephrosis 2, podocin                                                         | 5.052474 | 4.435295 | 4.012413 | 4.088892 | 3.035596 | 3.813353 |
| 17401066 | Ngf           | nerve growth factor                                                          | 12.63856 | 12.91343 | 11.84979 | 12.03972 | 9.064893 | 10.36667 |
| 17268210 | Ngfr          | nerve growth factor receptor (TNFR superfamily, member 16)                   | 8.720676 | 12.337   | 13.75277 | 14.24783 | 7.616721 | 11.67111 |
| 17537895 | Ngfrap1       | nerve growth factor receptor (TNFRSF16) associated protein 1                 | 6.738091 | 6.791687 | 6.791687 | 6.171709 | 6.690528 | 5.56106  |
| 17229813 | Nhlh1         | nescient helix loop helix 1                                                  | 3.586235 | 3.517182 | 3.270588 | 3.511092 | 3.621456 | 3.656162 |
| 17401036 | Nhlh2         | nescient helix loop helix 2                                                  | 4.20927  | 4.113681 | 4.20927  | 4.20927  | 5.059483 | 7.692806 |
| 17398903 | Nes           | nestin                                                                       | 4.954261 | 4.114337 | 7.400742 | 4.841755 | 5.179562 | 4.381242 |
| 17270583 | Nsf           | N-ethylmaleimide sensitive fusion protein                                    | 35.23238 | 36.28396 | 40.20464 | 35.30645 | 33.59769 | 37.72764 |
| 17474035 | Napa          | N-ethylmaleimide sensitive fusion protein attachment protein alpha           | 45.68378 | 53.56096 | 50.29524 | 46.46975 | 41.96108 | 50.77477 |
| 17392578 | Napb          | N-ethylmaleimide sensitive fusion protein attachment protein beta            | 4.088325 | 5.907591 | 6.637178 | 5.666233 | 7.322367 | 5.07237  |

|          |         |                                                                             |          |          |          |          |          |          |
|----------|---------|-----------------------------------------------------------------------------|----------|----------|----------|----------|----------|----------|
| 17351204 | Napg    | N-ethylmaleimide sensitive fusion protein attachment protein gamma          | 28.01097 | 25.0502  | 21.53976 | 22.27078 | 18.27488 | 21.60435 |
| 17264405 | Ntn1    | netrin 1                                                                    | 19.09059 | 24.29016 | 22.0163  | 19.78082 | 19.11814 | 19.40115 |
| 17341758 | Ntn3    | netrin 3                                                                    | 8.760966 | 7.853523 | 10.38479 | 10.0806  | 9.146438 | 11.8016  |
| 17236604 | Ntn4    | netrin 4                                                                    | 31.74044 | 22.15929 | 25.39707 | 18.98897 | 16.13219 | 21.61049 |
| 17477960 | Ntn5    | netrin 5                                                                    | 7.770137 | 7.935109 | 8.600258 | 8.769168 | 7.509204 | 6.613849 |
| 17409480 | Ntng1   | netrin G1                                                                   | 2.845969 | 2.797891 | 3.421692 | 2.822806 | 2.7751   | 2.847567 |
| 17409491 | Ntng1   | netrin G1                                                                   | 12.32777 | 11.27535 | 12.53708 | 12.20948 | 12.20948 | 10.24913 |
| 17383467 | Ntng2   | netrin G2                                                                   | 5.73761  | 5.032272 | 5.419651 | 4.975426 | 5.358429 | 4.384979 |
| 17479540 | Ngrn    | neugrin, neurite outgrowth associated                                       | 36.85249 | 30.52163 | 39.03212 | 32.11622 | 27.42577 | 33.43205 |
| 17526776 | Ncam1   | neural cell adhesion molecule 1                                             | 5.158995 | 6.377938 | 5.316217 | 5.53587  | 5.005832 | 4.14261  |
| 17326756 | Ncam2   | neural cell adhesion molecule 2                                             | 4.450045 | 3.650135 | 3.58375  | 3.795974 | 4.888121 | 4.292446 |
| 17519184 | Nedd4   | neural precursor cell expressed, developmentally down-regulated 4           | 532.8221 | 557.5317 | 521.6614 | 502.6429 | 478.4618 | 448.1631 |
| 17244244 | Nedd1   | neural precursor cell expressed, developmentally down-regulated gene 1      | 26.62076 | 29.13113 | 28.77273 | 20.33045 | 33.17145 | 35.71232 |
| 17351282 | Nedd4l  | neural precursor cell expressed, developmentally down-regulated gene 4-like | 178.2922 | 170.231  | 190.0217 | 173.9272 | 182.7161 | 138.7554 |
| 17306785 | Nedd8   | neural precursor cell expressed, developmentally down-regulated gene 8      | 127.3955 | 130.4642 | 120.0399 | 120.3899 | 117.6657 | 129.3405 |
| 17292071 | Nedd9   | neural precursor cell expressed, developmentally down-regulated gene 9      | 18.19929 | 16.76395 | 17.83835 | 14.54075 | 11.90042 | 19.51281 |
| 17367978 | Npdc1   | neural proliferation, differentiation and control 1                         | 10.99046 | 13.19537 | 11.77471 | 13.31112 | 13.55704 | 12.28529 |
| 17306680 | Nrl     | neural retina leucine zipper gene                                           | 7.78453  | 8.98775  | 8.467112 | 7.844383 | 9.456393 | 10.39357 |
| 17360166 | Neurl1a | neuralized E3 ubiquitin protein ligase 1A                                   | 13.48627 | 12.12598 | 12.12716 | 17.85789 | 13.61306 | 15.43764 |
| 17334922 | Neurl1b | neuralized E3 ubiquitin protein ligase 1B                                   | 8.7685   | 9.018766 | 7.603323 | 8.917257 | 8.767223 | 10.02799 |
| 17394292 | Neurl2  | neuralized E3 ubiquitin protein ligase 2                                    | 6.764719 | 7.781563 | 7.183167 | 7.106405 | 7.275014 | 6.189187 |
| 17222149 | Neurl3  | neuralized E3 ubiquitin protein ligase 3                                    | 52.99447 | 61.68125 | 75.30272 | 52.87156 | 48.37903 | 50.52095 |
| 17251767 | Neurl4  | neuralized E3 ubiquitin protein ligase 4                                    | 20.5004  | 29.97193 | 38.89412 | 33.22737 | 32.49059 | 33.16317 |
| 17336811 | Neu1    | neuraminidase 1                                                             | 65.22757 | 69.9116  | 66.45519 | 60.47219 | 66.45519 | 62.89747 |
| 17215298 | Neu2    | neuraminidase 2                                                             | 5.802843 | 6.034608 | 6.206758 | 5.813311 | 6.347815 | 6.347815 |
| 17493718 | Neu3    | neuraminidase 3                                                             | 12.56179 | 10.41434 | 14.63631 | 11.27996 | 12.08797 | 14.45143 |
| 17508609 | Nrg1    | neuregulin 1                                                                | 10.79709 | 10.67238 | 17.38969 | 10.69749 | 9.859674 | 6.233014 |
| 17353676 | Nrg2    | neuregulin 2                                                                | 10.16607 | 11.94984 | 11.31324 | 11.21183 | 13.40148 | 13.02381 |
| 17305182 | Nrg3    | neuregulin 3                                                                | 4.20927  | 3.842166 | 4.20927  | 4.20927  | 5.485222 | 4.789716 |
| 17298929 | Nrg3os  | neuregulin 3, opposite strand                                               | 3.049072 | 2.271885 | 2.597781 | 2.98014  | 2.626497 | 2.98014  |
| 17527332 | Nrg4    | neuregulin 4                                                                | 21.80323 | 34.01832 | 29.35756 | 18.91882 | 34.98537 | 25.85784 |
| 17291386 | Nrsn1   | neurensin 1                                                                 | 4.772483 | 5.599624 | 5.517635 | 5.199958 | 5.671892 | 6.003484 |
| 17392932 | Nrsn2   | neurensin 2                                                                 | 7.966688 | 7.429628 | 9.027021 | 9.316383 | 6.723722 | 7.654987 |
| 17348016 | Nrxn1   | neurexin I                                                                  | 16.36101 | 15.8299  | 17.54283 | 15.0528  | 11.87569 | 18.60824 |
| 17356924 | Nrxn2   | neurexin II                                                                 | 10.67926 | 9.37189  | 7.586634 | 8.51685  | 7.738425 | 9.401754 |
| 17277712 | Nrxn3   | neurexin III                                                                | 5.965363 | 5.510602 | 5.838873 | 6.420386 | 5.080041 | 6.414025 |
| 17456015 | Nxph1   | neurexophilin 1                                                             | 3.315324 | 3.787485 | 3.787485 | 4.152068 | 4.229069 | 3.473909 |
| 17367637 | Nxph2   | neurexophilin 2                                                             | 8.802114 | 10.45253 | 10.44326 | 9.214846 | 9.736073 | 10.10537 |
| 17268205 | Nxph3   | neurexophilin 3                                                             | 16.98289 | 19.16829 | 18.78566 | 17.68446 | 18.17181 | 20.81483 |
| 17245917 | Nxph4   | neurexophilin 4                                                             | 9.73803  | 9.42544  | 11.03068 | 10.02875 | 11.69873 | 9.431126 |
| 17526663 | Nxpe2   | neurexophilin and PC-esterase domain family, member 2                       | 14.27709 | 13.06568 | 10.00827 | 15.37453 | 9.757895 | 12.64373 |
| 17330988 | Nxpe3   | neurexophilin and PC-esterase domain family, member 3                       | 8.420524 | 8.24586  | 9.183028 | 8.420524 | 11.56746 | 7.548605 |
| 17516978 | Nxpe4   | neurexophilin and PC-esterase domain family, member 4                       | 5.308521 | 4.644876 | 5.303777 | 4.016559 | 5.948764 | 4.75818  |
| 17443803 | Nxpe5   | neurexophilin and PC-esterase domain family, member 5                       | 3.462322 | 3.897908 | 3.156466 | 3.287635 | 3.48102  | 3.287635 |
| 17291874 | Nrn1    | neuritin 1                                                                  | 295.5729 | 304.2282 | 311.3169 | 319.2206 | 514.0518 | 511.9539 |
| 17504998 | Nrn1l   | neuritin 1-like                                                             | 8.554123 | 12.85698 | 10.68104 | 10.46311 | 10.13223 | 11.17676 |
| 17405285 | Nbea    | neurobeachin                                                                | 7.936869 | 5.866866 | 6.112193 | 5.997661 | 5.997661 | 5.997661 |
| 17213369 | Nbeal1  | neurobeachin like 1                                                         | 54.30639 | 52.63607 | 45.58414 | 49.19637 | 52.09453 | 49.89454 |
| 17531591 | Nbeal2  | neurobeachin-like 2                                                         | 14.38666 | 14.86245 | 16.6305  | 15.39041 | 14.21872 | 11.17839 |
| 17274123 | Nbas    | neuroblastoma amplified sequence                                            | 57.89071 | 39.70971 | 38.82328 | 45.85445 | 39.40318 | 35.35837 |
| 17401117 | Nras    | neuroblastoma ras oncogene                                                  | 35.12339 | 42.28371 | 36.6797  | 33.0482  | 37.0628  | 38.93997 |
| 17431861 | Nbl1    | neuroblastoma, suppression of tumorigenicity 1                              | 7.344427 | 6.974404 | 7.914839 | 7.812423 | 7.552896 | 9.69533  |
| 17316574 | Ncald   | neurocalcin delta                                                           | 8.80779  | 7.698994 | 7.387519 | 8.672753 | 7.935109 | 8.469871 |
| 17509944 | Ncan    | neurocan                                                                    | 9.320323 | 6.277891 | 8.595431 | 8.509415 | 6.558746 | 10.11749 |
| 17430140 | Ncdn    | neurochondrin                                                               | 20.17798 | 22.84379 | 20.45143 | 18.7573  | 18.50227 | 21.36326 |
| 17395133 | Nespas  | neuroendocrine secretory protein antisense                                  | 5.67669  | 4.60902  | 4.489703 | 4.474573 | 5.334267 | 4.743526 |
| 17290242 | Net1    | neuroepithelial cell transforming gene 1                                    | 132.8496 | 150.0449 | 153.8361 | 137.188  | 111.6756 | 133.0191 |
| 17226916 | Nfasc   | neurofascin                                                                 | 12.86037 | 14.37958 | 14.31296 | 13.39423 | 10.84719 | 11.93255 |
| 17253746 | Nf1     | neurofibromatosis 1                                                         | 81.53796 | 84.80339 | 85.42462 | 85.13674 | 87.69544 | 84.04733 |
| 17260036 | Nf2     | neurofibromatosis 2                                                         | 30.92068 | 30.44915 | 33.72859 | 38.98318 | 32.08418 | 30.13003 |
| 17260066 | Nefh    | neurofilament, heavy polypeptide                                            | 9.182646 | 9.182646 | 9.244466 | 10.07564 | 8.90225  | 9.414079 |
| 17301582 | Nefl    | neurofilament, light polypeptide                                            | 3.059763 | 3.627285 | 3.253607 | 4.20927  | 2.920408 | 3.085512 |
| 17308046 | Nefm    | neurofilament, medium polypeptide                                           | 3.194987 | 3.131687 | 3.647227 | 3.590637 | 4.632401 | 3.509949 |
| 17387267 | Neurod1 | neurogenic differentiation 1                                                | 6.558655 | 6.479758 | 7.434677 | 6.368263 | 6.388734 | 7.7909   |
| 17268786 | Neurod2 | neurogenic differentiation 2                                                | 8.467112 | 7.228318 | 9.528176 | 10.00944 | 8.508884 | 8.467112 |
| 17246469 | Neurod4 | neurogenic differentiation 4                                                | 3.586981 | 3.837588 | 3.80435  | 3.790426 | 3.912932 | 4.419858 |
| 17467068 | Neurod6 | neurogenic differentiation 6                                                | 3.277033 | 3.756789 | 3.642073 | 3.337135 | 4.2044   | 3.355319 |
| 17293002 | Neurog1 | neurogenin 1                                                                | 7.17426  | 7.578645 | 6.979144 | 5.572791 | 6.949986 | 6.378557 |
| 17402513 | Neurog2 | neurogenin 2                                                                | 16.12928 | 14.91146 | 17.75877 | 16.72391 | 19.10635 | 13.76936 |
| 17233771 | Neurog3 | neurogenin 3                                                                | 4.521652 | 4.509414 | 4.518989 | 4.790878 | 6.443256 | 7.210753 |
| 17282789 | Ngb     | neuroglobin                                                                 | 6.938963 | 5.764238 | 6.107407 | 6.459489 | 4.633974 | 7.730544 |
| 17525649 | Nrgn    | neurogranin                                                                 | 4.746881 | 5.982299 | 4.613527 | 5.433644 | 8.144973 | 5.570589 |
| 17300396 | Ngdn    | neuroguidin, EIF4E binding protein                                          | 65.92529 | 51.66517 | 50.65771 | 52.99631 | 50.47125 | 39.84592 |
| 17404388 | Nlgn1   | neuroligin 1                                                                | 3.284423 | 3.2227   | 3.61148  | 3.154891 | 3.927224 | 3.482468 |
| 17264984 | Nlgn2   | neuroligin 2                                                                | 10.02152 | 10.87347 | 7.544002 | 10.24757 | 11.04774 | 10.26186 |
| 17536720 | Nlgn3   | neuroligin 3                                                                | 10.69334 | 11.44178 | 10.06252 | 12.18353 | 10.43609 | 11.49536 |
| 17295907 | Nln     | neurolysin (metallopeptidase M3 family)                                     | 58.45684 | 57.28835 | 53.72866 | 53.28066 | 51.16197 | 49.91599 |
| 17492722 | Nmb     | neuromedin B                                                                | 16.67113 | 11.70782 | 12.46715 | 14.35598 | 13.10813 | 14.61684 |
| 17231774 | Nmbr    | neuromedin B receptor                                                       | 5.40266  | 4.82507  | 3.697474 | 5.295585 | 3.407515 | 4.20927  |
| 17212069 | Nms     | neuromedin S                                                                | 5.075395 | 4.954296 | 5.184662 | 4.670121 | 5.397345 | 5.584507 |
| 17448997 | Nmu     | neuromedin U                                                                | 7.258744 | 7.045783 | 6.955142 | 7.230623 | 7.066031 | 9.017078 |
| 17225175 | Nmur1   | neuromedin U receptor 1                                                     | 13.57265 | 11.60738 | 12.08596 | 12.84478 | 12.55361 | 12.58209 |
| 17263024 | Nmur2   | neuromedin U receptor 2                                                     | 3.832963 | 5.300432 | 4.289888 | 3.690254 | 3.119706 | 4.789882 |
| 17231040 | Nenf    | neuron derived neurotrophic factor                                          | 13.03971 | 23.24454 | 18.23072 | 18.96937 | 17.98086 | 17.39993 |

|          |               |                                                                      |          |          |          |          |          |          |
|----------|---------------|----------------------------------------------------------------------|----------|----------|----------|----------|----------|----------|
| 17227348 | Nav1          | neuron navigator 1                                                   | 21.29481 | 19.34233 | 22.94169 | 21.29481 | 19.03285 | 16.11308 |
| 17227379 | Nav1          | neuron navigator 1                                                   | 23.77099 | 25.43635 | 24.96284 | 21.83726 | 22.86169 | 20.05542 |
| 17478301 | Nav2          | neuron navigator 2                                                   | 31.97694 | 27.8063  | 33.57231 | 34.05607 | 26.79812 | 26.74097 |
| 17244864 | Nav3          | neuron navigator 3                                                   | 4.857453 | 5.093545 | 4.909717 | 4.943011 | 4.553103 | 3.800581 |
| 17447615 | Nsg1          | neuron specific gene family member 1                                 | 10.68933 | 11.59556 | 13.80357 | 10.7607  | 10.05443 | 11.9395  |
| 17248231 | Nsg2          | neuron specific gene family member 2                                 | 5.923172 | 5.386134 | 5.14439  | 5.386134 | 4.994049 | 4.727574 |
| 17369368 | Ncs1          | neuronal calcium sensor 1                                            | 5.389607 | 4.804079 | 5.708018 | 4.887037 | 4.579817 | 4.804079 |
| 17275255 | Nrcam         | neuronal cell adhesion molecule                                      | 2.990507 | 3.557885 | 2.713472 | 3.052455 | 2.999828 | 3.852086 |
| 17403829 | Negr1         | neuronal growth regulator 1                                          | 3.592156 | 4.72361  | 3.549609 | 4.272854 | 4.352065 | 5.269368 |
| 17225261 | Ngef          | neuronal guanine nucleotide exchange factor                          | 33.64266 | 35.42264 | 36.65352 | 33.97614 | 30.49033 | 38.72035 |
| 17486915 | Npas1         | neuronal PAS domain protein 1                                        | 5.280813 | 5.010623 | 4.561505 | 4.801649 | 4.766301 | 5.79087  |
| 17212087 | Npas2         | neuronal PAS domain protein 2                                        | 17.47257 | 14.23322 | 15.91593 | 19.55099 | 12.39546 | 13.75    |
| 17275454 | Npas3         | neuronal PAS domain protein 3                                        | 4.876987 | 4.578357 | 4.830425 | 4.413307 | 4.901217 | 5.296392 |
| 17361435 | Npas4         | neuronal PAS domain protein 4                                        | 6.82666  | 6.064716 | 6.82666  | 6.82666  | 6.671633 | 7.068774 |
| 17272926 | Nptx1         | neuronal pentraxin 1                                                 | 4.019121 | 5.161034 | 5.265389 | 5.179059 | 4.960481 | 5.111264 |
| 17444498 | Nptx2         | neuronal pentraxin 2                                                 | 12.16108 | 14.39634 | 15.56183 | 13.3355  | 14.83775 | 13.40556 |
| 17319339 | Npcd          | neuronal pentraxin chromo domain                                     | 9.215868 | 10.82121 | 11.73755 | 8.681113 | 10.87075 | 10.32872 |
| 17353370 | Nrep          | neuronal regeneration related protein                                | 28.99877 | 32.22704 | 34.1935  | 38.37939 | 38.62117 | 34.21009 |
| 17214735 | Nyap2         | neuronal tyrosine-phosphorylated phosphoinositide 3-kinase adaptor 2 | 2.777371 | 3.250789 | 2.909417 | 2.95976  | 3.151394 | 2.82263  |
| 17454145 | Nyap1         | neuronal tyrosine-phosphorylated phosphoinositide 3-kinase adaptor 1 | 4.897447 | 6.210933 | 5.535524 | 8.323325 | 5.489139 | 6.347815 |
| 17378741 | Nnat          | neuronatin                                                           | 18.19689 | 22.88547 | 19.54381 | 20.42452 | 17.63733 | 19.72044 |
| 17459207 | Ndnf          | neuron-derived neurotrophic factor                                   | 2.930364 | 3.164549 | 3.24316  | 2.988642 | 4.233321 | 3.39808  |
| 17280913 | Nova1         | neuro-oncological ventral antigen 1                                  | 4.447054 | 5.120306 | 5.120306 | 5.120306 | 5.120306 | 5.120306 |
| 17474377 | Nova2         | neuro-oncological ventral antigen 2                                  | 8.890903 | 9.587469 | 8.92443  | 7.90119  | 8.467112 | 8.467112 |
| 17259430 | Npb           | neuropeptide B                                                       | 5.741151 | 4.771854 | 11.31638 | 7.207505 | 6.172094 | 5.797175 |
| 17233716 | Npffr1        | neuropeptide FF receptor 1                                           | 13.65162 | 14.17818 | 13.90855 | 14.64098 | 13.90855 | 12.45454 |
| 17438869 | Npffr2        | neuropeptide FF receptor 2                                           | 6.002361 | 7.307612 | 6.002361 | 6.310525 | 5.26725  | 6.887594 |
| 17322254 | Npff          | neuropeptide FF-amide peptide precursor                              | 14.23647 | 13.13624 | 16.84385 | 13.38792 | 12.98217 | 13.24697 |
| 17484221 | Nps           | neuropeptide S                                                       | 3.885526 | 3.786566 | 3.461698 | 4.625117 | 4.091387 | 4.575534 |
| 17515496 | Npsr1         | neuropeptide S receptor 1                                            | 7.333795 | 6.031973 | 5.289788 | 6.32866  | 6.214249 | 5.869347 |
| 17466743 | Npvf          | neuropeptide VF precursor                                            | 3.725644 | 3.246466 | 3.703758 | 3.76795  | 3.81449  | 3.727814 |
| 17341975 | Npw           | neuropeptide W                                                       | 9.263196 | 9.055285 | 7.049544 | 8.405712 | 7.799761 | 7.827274 |
| 17458514 | Npy           | neuropeptide Y                                                       | 7.804953 | 9.450627 | 7.330848 | 7.36293  | 9.836125 | 9.514712 |
| 17501544 | Npy1r         | neuropeptide Y receptor Y1                                           | 3.269523 | 4.055894 | 3.430574 | 3.584495 | 3.81145  | 4.599127 |
| 17406233 | Npy2r         | neuropeptide Y receptor Y2                                           | 3.123276 | 2.96058  | 2.353683 | 2.74634  | 2.776697 | 3.34698  |
| 17305005 | Npy4r         | neuropeptide Y receptor Y4                                           | 3.019291 | 3.822377 | 4.605411 | 3.396668 | 3.201926 | 3.609978 |
| 17509706 | Npy5r         | neuropeptide Y receptor Y5                                           | 7.785879 | 7.538774 | 8.546774 | 7.232127 | 9.321939 | 9.699565 |
| 17350262 | Npy6r         | neuropeptide Y receptor Y6                                           | 2.20699  | 2.007792 | 2.448401 | 2.404972 | 2.434389 | 2.734733 |
| 17221110 | Npbwr1        | neuropeptides B/W receptor 1                                         | 4.01461  | 4.57024  | 4.20927  | 3.106715 | 5.726406 | 6.347815 |
| 17352252 | Neto1         | neuropilin (NRP) and tolloid (TLL)-like 1                            | 4.147293 | 4.20927  | 3.536053 | 3.258053 | 2.62264  | 3.258053 |
| 17511377 | Neto2         | neuropilin (NRP) and tolloid (TLL)-like 2                            | 9.980347 | 7.781294 | 8.68659  | 7.781294 | 7.781294 | 7.474204 |
| 17506991 | Nrp1          | neuropilin 1                                                         | 154.7741 | 144.9217 | 139.0953 | 134.6061 | 142.5861 | 106.9187 |
| 17213548 | Nrp2          | neuropilin 2                                                         | 46.8946  | 46.62785 | 53.82782 | 38.88387 | 28.00592 | 29.61262 |
| 17517914 | Nptn          | neuropilin 2                                                         | 94.24081 | 95.26537 | 93.78856 | 85.504   | 93.2473  | 76.19846 |
| 17244601 | Nts           | neurotensin                                                          | 4.48625  | 3.898854 | 3.549215 | 4.279523 | 3.729055 | 3.549215 |
| 17380782 | Ntsr1         | neurotensin receptor 1                                               | 5.113213 | 5.092062 | 5.48933  | 5.947692 | 5.596171 | 5.969293 |
| 17274195 | Ntsr2         | neurotensin receptor 2                                               | 10.41196 | 12.33948 | 13.0464  | 11.28043 | 12.03655 | 12.99036 |
| 17525198 | Ntm           | neurotrimin                                                          | 9.882253 | 9.021454 | 11.21564 | 11.75759 | 9.290524 | 10.16424 |
| 17548736 | Ntm           | neurotrimin                                                          | 4.859676 | 5.119809 | 4.957697 | 5.547047 | 4.957422 | 5.168695 |
| 17406586 | Ntrk1         | neurotrophic tyrosine kinase, receptor, type 1                       | 6.525507 | 7.153206 | 6.240277 | 7.981224 | 7.960009 | 9.969354 |
| 17287901 | Ntrk2         | neurotrophic tyrosine kinase, receptor, type 2                       | 5.47231  | 4.437878 | 4.597693 | 5.581914 | 10.32872 | 8.795954 |
| 17492244 | Ntrk3         | neurotrophic tyrosine kinase, receptor, type 3                       | 4.270604 | 4.270604 | 5.252193 | 4.270604 | 4.195986 | 4.608956 |
| 17471140 | Ntf3          | neurotrophin 3                                                       | 13.85803 | 14.21616 | 20.59069 | 13.84401 | 12.41403 | 13.16249 |
| 17477796 | Ntf5          | neurotrophin 5                                                       | 8.691891 | 7.678476 | 8.460541 | 9.768655 | 8.563497 | 8.875817 |
| 17531581 | Nradd         | neurotrophin receptor associated death domain                        | 6.539544 | 6.325984 | 7.901519 | 7.391361 | 6.568528 | 8.668657 |
| 17346344 | Nrtn          | neurturin                                                            | 9.822907 | 8.140289 | 10.50439 | 10.52392 | 10.50439 | 9.913607 |
| 17396369 | Nceh1         | neutral cholesterol ester hydrolase 1                                | 44.58882 | 52.1162  | 54.77554 | 47.72092 | 33.53347 | 29.9329  |
| 17423066 | Nsmaf         | neutral sphingomyelinase (N-SMase) activation associated factor      | 43.90399 | 52.56425 | 53.42303 | 57.4092  | 54.39756 | 46.49456 |
| 17453288 | Ncf1          | neutrophil cytosolic factor 1                                        | 22.1401  | 16.85156 | 20.24803 | 16.16846 | 9.392505 | 18.24741 |
| 17218261 | Ncf2          | neutrophil cytosolic factor 2                                        | 18.60051 | 21.16561 | 21.95945 | 19.49537 | 23.22586 | 15.5912  |
| 17312700 | Ncf4          | neutrophil cytosolic factor 4                                        | 8.210443 | 13.82589 | 12.56728 | 9.941613 | 13.49104 | 10.2136  |
| 17522369 | Ngp           | neutrophilic granule protein                                         | 6.883632 | 7.647032 | 9.633032 | 6.733516 | 10.45195 | 6.106518 |
| 17411201 | Nexn          | nexilin                                                              | 5.115198 | 5.445219 | 6.032015 | 5.002711 | 5.148635 | 4.176516 |
| 17319738 | Nfam1         | Nfat activating molecule with ITAM motif 1                           | 12.94856 | 14.13147 | 13.37911 | 14.31038 | 13.7223  | 13.55394 |
| 17540977 | Nkrf          | NF-kappaB repressing factor                                          | 13.44325 | 15.83308 | 10.47988 | 14.76132 | 18.22618 | 14.9923  |
| 17534142 | Nkap          | NFKB activating protein                                              | 15.0157  | 10.81641 | 14.7817  | 14.37241 | 13.72477 | 13.06115 |
| 17290957 | Nkapl         | NFKB activating protein-like                                         | 5.858535 | 5.736656 | 5.617429 | 4.998239 | 6.328923 | 5.337263 |
| 17297374 | Nkiras1       | NFKB inhibitor interacting Ras-like protein 1                        | 39.16546 | 32.18552 | 30.15907 | 31.74418 | 30.25245 | 34.36124 |
| 17256414 | Nkiras2       | NFKB inhibitor interacting Ras-like protein 2                        | 16.25464 | 16.79349 | 17.77959 | 16.57641 | 17.36523 | 17.36523 |
| 17460494 | Nfu1          | NFU1 iron-sulfur cluster scaffold homolog (S. cerevisiae)            | 68.65534 | 71.25898 | 68.78967 | 67.25455 | 67.35952 | 69.03567 |
| 17283088 | 1700019M22Rik | NFX-like protein                                                     | 2.629412 | 2.300376 | 3.014064 | 2.511797 | 3.670356 | 2.246891 |
| 17222913 | Nab1          | Ngfi-A binding protein 1                                             | 55.84747 | 53.56096 | 51.6734  | 44.25811 | 49.1524  | 49.96098 |
| 17238088 | Nab2          | Ngfi-A binding protein 2                                             | 15.91064 | 18.14638 | 17.58045 | 16.51712 | 15.50939 | 17.74696 |
| 17246019 | Nab2          | Ngfi-A binding protein 2                                             | 76.01594 | 83.63066 | 77.84918 | 86.35812 | 97.9939  | 100.9075 |
| 17213153 | Nif3l1        | Ngg1 interacting factor 3-like 1 (S. pombe)                          | 29.2714  | 23.42488 | 28.1318  | 26.72819 | 27.29472 | 29.13154 |
| 17297305 | Ngly1         | N-glycanase 1                                                        | 102.4638 | 91.46957 | 78.47167 | 94.49067 | 96.6401  | 92.47234 |
| 17292258 | Nhlrc1        | NHL repeat containing 1                                              | 10.47145 | 10.14629 | 11.17141 | 8.33909  | 9.865143 | 10.69096 |
| 17360585 | Nhlrc2        | NHL repeat containing 2                                              | 37.33275 | 46.18364 | 57.22446 | 41.37221 | 46.82769 | 61.11904 |
| 17405197 | Nhlrc3        | NHL repeat containing 3                                              | 31.5142  | 40.38759 | 37.22036 | 34.54201 | 30.72008 | 34.06835 |
| 17342529 | Nhlrc4        | NHL repeat containing 4                                              | 4.267704 | 5.219422 | 5.686536 | 4.729377 | 3.870017 | 3.332165 |
| 17319576 | Nhp2l1        | NHP2 non-histone chromosome protein 2-like 1 (S. cerevisiae)         | 10.34556 | 9.97039  | 9.488171 | 8.522106 | 8.686831 | 9.630896 |
| 17249347 | Nhp2          | NHP2 ribonucleoprotein                                               | 36.69471 | 39.69458 | 30.71646 | 40.62089 | 37.76558 | 39.69458 |
| 17516993 | LOC100862468  | NHP2-like protein 1                                                  | 76.754   | 89.11337 | 87.01728 | 79.7283  | 85.70753 | 89.65673 |
| 17231826 | Nhsl1         | NHS-like 1                                                           | 18.32016 | 17.45998 | 19.724   | 19.41702 | 15.71837 | 12.92847 |

|          |              |                                                            |          |          |          |          |          |          |
|----------|--------------|------------------------------------------------------------|----------|----------|----------|----------|----------|----------|
| 17536861 | Nhsl2        | NHS-like 2                                                 | 5.652033 | 5.801315 | 5.42059  | 5.652033 | 6.030928 | 4.862169 |
| 17411981 | Nbn          | nibrin                                                     | 38.89762 | 32.72815 | 30.94126 | 35.53799 | 30.86479 | 35.82339 |
| 17243361 | Ncln         | nicalin homolog (zebrafish)                                | 63.71981 | 58.1356  | 59.57974 | 56.53138 | 68.86457 | 58.12029 |
| 17229818 | Ncstn        | nicastatin                                                 | 94.90749 | 102.7974 | 93.76256 | 83.38465 | 78.30921 | 82.1609  |
| 17521652 | Nicn1        | nicotin 1                                                  | 62.62471 | 65.43905 | 74.76598 | 63.17842 | 70.06247 | 62.15808 |
| 17526695 | Nnmt         | nicotinamide N-methyltransferase                           | 47.34335 | 52.09056 | 59.90108 | 51.25888 | 53.22345 | 61.96106 |
| 17433151 | Nmnat1       | nicotinamide nucleotide adenyllyltransferase 1             | 29.87155 | 31.99623 | 32.89189 | 30.04785 | 20.80113 | 28.76615 |
| 17218277 | Nmnat2       | nicotinamide nucleotide adenyllyltransferase 2             | 9.808755 | 10.68481 | 12.28486 | 10.41665 | 10.68481 | 10.6587  |
| 17520611 | Nmnat3       | nicotinamide nucleotide adenyllyltransferase 3             | 11.26386 | 8.9971   | 11.52312 | 12.62446 | 12.38215 | 13.67586 |
| 17296489 | Nnt          | nicotinamide nucleotide transhydrogenase                   | 61.28788 | 64.57617 | 70.43839 | 56.6683  | 52.26959 | 59.68349 |
| 17274875 | Nampt        | nicotinamide phosphoribosyltransferase                     | 73.07672 | 82.417   | 99.69436 | 85.10193 | 99.69436 | 87.06072 |
| 17358020 | Nmrk1        | nicotinamide riboside kinase 1                             | 13.93286 | 25.04811 | 33.37394 | 20.08324 | 25.7959  | 20.87378 |
| 17243219 | Nmrk2        | nicotinamide riboside kinase 2                             | 5.397607 | 5.8377   | 4.256359 | 5.433681 | 5.347631 | 4.930999 |
| 17318194 | Naprt        | nicotinate phosphoribosyltransferase                       | 111.3563 | 122.745  | 112.0633 | 101.2277 | 107.6609 | 103.1357 |
| 17285244 | Nid1         | nidogen 1                                                  | 26.88445 | 29.12548 | 36.45387 | 20.31791 | 22.40098 | 22.24887 |
| 17297391 | Nid2         | nidogen 2                                                  | 14.83024 | 15.46366 | 13.02733 | 12.50679 | 12.50679 | 13.41523 |
| 17285225 | LOC105245453 | nidogen-1-like                                             | 61.38184 | 68.94815 | 68.56213 | 46.61848 | 37.40632 | 39.88405 |
| 17352731 | Npc1         | Niemann-Pick type C1                                       | 261.0405 | 236.832  | 252.6121 | 219.3529 | 215.1889 | 228.2862 |
| 17282563 | Npc2         | Niemann-Pick type C2                                       | 99.81606 | 112.9915 | 114.1645 | 106.4764 | 131.3425 | 99.78285 |
| 17538018 | Nrk          | Nik related kinase                                         | 3.25496  | 3.301565 | 3.25496  | 3.38616  | 3.329187 | 3.460403 |
| 17296532 | Nim1k        | NIM1 serine/threonine protein kinase                       | 11.50493 | 10.35223 | 11.48461 | 10.94606 | 9.083322 | 9.543973 |
| 17297258 | Nek10        | NIMA (never in mitosis gene a)- related kinase 10          | 4.349893 | 3.343409 | 3.230842 | 3.441315 | 3.441315 | 3.361232 |
| 17501367 | Nek1         | NIMA (never in mitosis gene a)-related expressed kinase 1  | 31.38689 | 26.40209 | 23.11424 | 30.91168 | 22.91055 | 22.64201 |
| 17530436 | Nek11        | NIMA (never in mitosis gene a)-related expressed kinase 11 | 3.623214 | 4.486934 | 4.486934 | 4.748757 | 4.486934 | 5.239104 |
| 17220844 | Nek2         | NIMA (never in mitosis gene a)-related expressed kinase 2  | 6.223905 | 6.600887 | 6.385635 | 6.786793 | 7.126432 | 7.928566 |
| 17508006 | Nek3         | NIMA (never in mitosis gene a)-related expressed kinase 3  | 10.70231 | 10.88757 | 10.36616 | 13.80377 | 8.690083 | 11.34701 |
| 17298292 | Nek4         | NIMA (never in mitosis gene a)-related expressed kinase 4  | 32.81992 | 34.01903 | 32.57177 | 34.22408 | 30.73115 | 30.50069 |
| 17507982 | Nek5         | NIMA (never in mitosis gene a)-related expressed kinase 5  | 5.061868 | 6.247245 | 6.4223   | 5.440767 | 6.449065 | 6.899539 |
| 17370455 | Nek6         | NIMA (never in mitosis gene a)-related expressed kinase 6  | 92.0726  | 58.50021 | 60.50154 | 53.79425 | 76.24601 | 46.5978  |
| 17227570 | Nek7         | NIMA (never in mitosis gene a)-related expressed kinase 7  | 154.5854 | 167.0782 | 137.0027 | 144.3623 | 147.7977 | 147.5786 |
| 17266344 | Nek8         | NIMA (never in mitosis gene a)-related expressed kinase 8  | 9.534254 | 9.041925 | 9.422109 | 8.494859 | 10.22409 | 10.01284 |
| 17282698 | Nek9         | NIMA (never in mitosis gene a)-related expressed kinase 9  | 67.24383 | 62.85606 | 56.97748 | 48.87552 | 54.97829 | 59.09483 |
| 17512740 | Nob1         | NIN1/RPN12 binding protein 1 homolog (S. cerevisiae)       | 32.85202 | 33.42973 | 36.74281 | 29.08675 | 36.1662  | 28.75359 |
| 17281686 | Nin          | ninein                                                     | 8.353611 | 11.31661 | 13.43375 | 10.30648 | 11.20569 | 15.30414 |
| 17392748 | Ninl         | ninein-like                                                | 7.70695  | 8.248547 | 9.623956 | 8.215111 | 7.935109 | 8.100663 |
| 17287107 | Ninj1        | ninjurin 1                                                 | 55.087   | 61.13557 | 58.16099 | 63.20383 | 66.80712 | 53.86439 |
| 17462310 | Ninj2        | ninjurin 2                                                 | 7.994013 | 8.289816 | 8.289816 | 8.081819 | 8.289816 | 8.134874 |
| 17438062 | Nipal1       | NIPA-like domain containing 1                              | 27.09454 | 75.51598 | 78.06695 | 58.39731 | 129.2966 | 83.29454 |
| 17316402 | Nipal2       | NIPA-like domain containing 2                              | 3.324644 | 3.583005 | 3.285129 | 3.304312 | 3.780979 | 3.941596 |
| 17431454 | Nipal3       | NIPA-like domain containing 3                              | 23.59697 | 22.11679 | 29.79978 | 25.83473 | 25.08547 | 25.83473 |
| 17262055 | Nipal4       | NIPA-like domain containing 4                              | 12.61423 | 9.041675 | 10.43884 | 9.871505 | 10.20879 | 11.87668 |
| 17315810 | Nipbl        | Nipped-B homolog (Drosophila)                              | 105.6281 | 109.9436 | 96.89431 | 104.4429 | 105.6281 | 112.1682 |
| 17414161 | Nipsnap3a    | nipsnap homolog 3A (C. elegans)                            | 3.440099 | 3.263862 | 2.857176 | 3.959313 | 2.890342 | 3.079402 |
| 17414173 | Nipsnap3b    | nipsnap homolog 3B (C. elegans)                            | 91.14679 | 66.04603 | 71.46079 | 76.08657 | 80.69179 | 68.90611 |
| 17304596 | Nisch        | nischarin                                                  | 89.36141 | 96.12768 | 111.6021 | 95.02005 | 89.67911 | 81.10731 |
| 17449073 | Noa1         | nitric oxide associated 1                                  | 30.89454 | 31.10641 | 30.89454 | 29.4703  | 29.27181 | 26.8273  |
| 17229537 | Nos1ap       | nitric oxide synthase 1 (neuronal) adaptor protein         | 22.16713 | 21.64347 | 27.48533 | 23.79456 | 24.87785 | 20.94204 |
| 17441453 | Nos1         | nitric oxide synthase 1, neuronal                          | 5.764079 | 6.831394 | 6.408337 | 6.639433 | 6.346979 | 6.862004 |
| 17253707 | Nos2         | nitric oxide synthase 2, inducible                         | 4.951858 | 5.726525 | 8.349501 | 6.171709 | 6.171709 | 7.612657 |
| 17435282 | Nos3         | nitric oxide synthase 3, endothelial cell                  | 17.62706 | 19.487   | 20.67478 | 15.07295 | 14.63043 | 14.56668 |
| 17477679 | Nosip        | nitric oxide synthase interacting protein                  | 32.93432 | 29.54107 | 23.29761 | 27.37202 | 28.34024 | 32.44625 |
| 17371390 | Nostrin      | nitric oxide synthase trafficker                           | 46.00568 | 38.52946 | 46.65598 | 49.16944 | 43.46493 | 40.31207 |
| 17229729 | Nit1         | nitrilase 1                                                | 207.3666 | 202.4217 | 205.6632 | 228.416  | 234.1485 | 222.7328 |
| 17331102 | Nit2         | nitrilase family, member 2                                 | 190.766  | 150.499  | 135.6034 | 187.5368 | 198.3342 | 211.5024 |
| 17393483 | Nfs1         | nitrogen fixation gene 1 (S. cerevisiae)                   | 75.81493 | 70.10571 | 73.07723 | 74.88579 | 61.97309 | 62.82383 |
| 17521376 | Nprl2        | nitrogen permease regulator-like 2                         | 43.37705 | 35.06306 | 43.37705 | 46.47652 | 44.89242 | 43.37705 |
| 17261494 | Nprl3        | nitrogen permease regulator-like 3                         | 27.28923 | 21.22629 | 23.89456 | 25.21762 | 22.14072 | 24.02975 |
| 17447110 | Nkx1-1       | NK1 transcription factor related, locus 1 (Drosophila)     | 17.90909 | 19.66298 | 16.52055 | 19.80908 | 17.07235 | 17.61741 |
| 17497104 | Nkx1-2       | NK1 transcription factor related, locus 2 (Drosophila)     | 6.05002  | 6.844428 | 6.36663  | 7.467265 | 8.396569 | 6.826944 |
| 17281299 | Nkx2-1       | NK2 homeobox 1                                             | 4.603113 | 5.246553 | 5.383222 | 3.700269 | 4.949696 | 5.945673 |
| 17392529 | Nkx2-2       | NK2 homeobox 2                                             | 5.531305 | 6.7788   | 6.201555 | 6.049475 | 5.742902 | 7.605484 |
| 17377317 | Nkx2-2os     | NK2 homeobox 2, opposite strand                            | 5.54847  | 6.800968 | 6.387184 | 6.429382 | 6.315382 | 6.562293 |
| 17359599 | Nkx2-3       | NK2 homeobox 3                                             | 4.377782 | 4.377782 | 4.058988 | 5.331014 | 4.148529 | 4.20962  |
| 17392525 | Nkx2-4       | NK2 homeobox 4                                             | 10.24736 | 10.58068 | 11.49034 | 11.67678 | 9.554233 | 8.881849 |
| 17342656 | Nkx2-5       | NK2 homeobox 5                                             | 31.36536 | 30.09496 | 27.40923 | 27.89452 | 31.91361 | 28.96964 |
| 17301605 | Nkx2-6       | NK2 homeobox 6                                             | 8.698641 | 9.607493 | 9.914981 | 10.14481 | 9.648469 | 10.23025 |
| 17281306 | Nkx2-9       | NK2 homeobox 9                                             | 8.249691 | 10.3966  | 9.558803 | 8.706965 | 9.831489 | 10.18751 |
| 17447749 | Nkx3-2       | NK3 homeobox 2                                             | 7.437718 | 8.599245 | 8.721462 | 8.127885 | 9.000655 | 9.258253 |
| 17301610 | Nkx3-1       | NK-3 transcription factor, locus 1 (Drosophila)            | 7.172818 | 9.79829  | 8.71264  | 7.484106 | 7.262015 | 7.262015 |
| 17450199 | Nkx6-1       | NK6 homeobox 1                                             | 6.935068 | 6.587815 | 6.345835 | 6.476929 | 6.051446 | 6.368043 |
| 17497449 | Nkx6-2       | NK6 homeobox 2                                             | 9.827742 | 11.15903 | 11.14033 | 11.48875 | 11.07942 | 11.28364 |
| 17500062 | Nkx6-3       | NK6 homeobox 3                                             | 13.47796 | 12.97219 | 10.92279 | 13.3126  | 14.81052 | 17.50033 |
| 17526160 | Nlrx1        | NLR family member X1                                       | 22.41061 | 25.50114 | 19.49808 | 19.25966 | 19.20553 | 16.21391 |
| 17295627 | Naip1        | NLR family, apoptosis inhibitory protein 1                 | 2.67402  | 3.54506  | 3.54506  | 4.909615 | 3.263862 | 2.74712  |
| 17295569 | Naip2        | NLR family, apoptosis inhibitory protein 2                 | 6.747579 | 6.801722 | 6.535013 | 3.397892 | 3.797421 | 5.12716  |
| 17295588 | Naip5        | NLR family, apoptosis inhibitory protein 5                 | 4.818019 | 4.909071 | 10.54049 | 4.511947 | 7.993349 | 6.90351  |
| 17295607 | Naip6        | NLR family, apoptosis inhibitory protein 6                 | 3.968104 | 5.386582 | 3.7072   | 4.656707 | 10.02945 | 3.318658 |
| 17327613 | Nlrc3        | NLR family, CARD domain containing 3                       | 4.681043 | 5.919724 | 4.327519 | 5.190703 | 4.681043 | 4.807944 |
| 17347236 | Nlrc4        | NLR family, CARD domain containing 4                       | 4.863787 | 5.32278  | 4.763526 | 6.499235 | 5.489939 | 5.135127 |
| 17504023 | Nlrc5        | NLR family, CARD domain containing 5                       | 19.08967 | 22.96126 | 24.37432 | 22.7422  | 22.96126 | 22.96127 |
| 17494822 | Nlrp10       | NLR family, pyrin domain containing 10                     | 4.218207 | 4.327129 | 4.022661 | 4.183122 | 4.009632 | 3.725128 |
| 17485497 | Nlrp12       | NLR family, pyrin domain containing 12                     | 58.30873 | 77.99069 | 78.85334 | 97.29879 | 96.167   | 73.89936 |
| 17481514 | Nlrp14       | NLR family, pyrin domain containing 14                     | 3.172676 | 2.683731 | 3.069024 | 2.935365 | 3.381938 | 3.035975 |
| 17265473 | Nlrp1a       | NLR family, pyrin domain containing 1A                     | 4.520963 | 3.65994  | 2.933677 | 2.929735 | 3.672443 | 3.273332 |

|          |           |                                                                      |          |          |          |          |          |          |
|----------|-----------|----------------------------------------------------------------------|----------|----------|----------|----------|----------|----------|
| 17265496 | Nlrp1b    | NLR family, pyrin domain containing 1B                               | 3.538186 | 3.263862 | 4.056878 | 2.879823 | 4.154688 | 3.074965 |
| 17265526 | Nlrp1c-ps | NLR family, pyrin domain containing 1C, pseudogene                   | 4.220372 | 7.034218 | 5.09245  | 3.717235 | 4.876513 | 4.674882 |
| 17486025 | Nlrp2     | NLR family, pyrin domain containing 2                                | 3.457694 | 3.952019 | 3.82959  | 3.972535 | 3.438883 | 3.04044  |
| 17250249 | Nlrp3     | NLR family, pyrin domain containing 3                                | 4.102405 | 4.107954 | 5.367908 | 3.725515 | 3.706661 | 5.422432 |
| 17475410 | Nlrp4a    | NLR family, pyrin domain containing 4A                               | 2.936851 | 3.695271 | 2.668983 | 2.70236  | 2.546208 | 3.043455 |
| 17473671 | Nlrp4b    | NLR family, pyrin domain containing 4B                               | 3.147835 | 1.830389 | 2.093708 | 2.481702 | 2.564167 | 2.294675 |
| 17473525 | Nlrp4c    | NLR family, pyrin domain containing 4C                               | 2.422741 | 3.024465 | 2.09349  | 2.939397 | 2.899572 | 2.641853 |
| 17486436 | Nlrp4d    | NLR family, pyrin domain containing 4D                               | 3.434571 | 4.320805 | 4.141261 | 3.061864 | 2.931238 | 3.296671 |
| 17474809 | Nlrp4e    | NLR family, pyrin domain containing 4E                               | 3.481937 | 2.306012 | 3.131014 | 2.754671 | 3.250924 | 1.97386  |
| 17474732 | Gm4541    | NLR family, pyrin domain containing 4E pseudogene                    | 4.03109  | 3.7878   | 3.374351 | 3.374351 | 3.374351 | 3.581292 |
| 17474752 | Gm4541    | NLR family, pyrin domain containing 4E pseudogene                    | 3.033935 | 3.582359 | 3.246533 | 3.258776 | 3.122713 | 3.670992 |
| 17474767 | Gm4541    | NLR family, pyrin domain containing 4E pseudogene                    | 3.033935 | 3.582359 | 3.246533 | 3.258776 | 3.122713 | 3.670992 |
| 17474791 | Gm4541    | NLR family, pyrin domain containing 4E pseudogene                    | 4.03109  | 3.7878   | 3.374351 | 3.374351 | 3.374351 | 3.581292 |
| 17474803 | Gm4541    | NLR family, pyrin domain containing 4E pseudogene                    | 4.03109  | 3.7878   | 3.374351 | 3.374351 | 3.374351 | 3.581292 |
| 17293774 | Nlrp4f    | NLR family, pyrin domain containing 4F                               | 2.495364 | 2.50243  | 3.128953 | 2.448248 | 2.546031 | 2.02194  |
| 17474820 | Nlrp5     | NLR family, pyrin domain containing 5                                | 4.717328 | 4.563846 | 4.512916 | 5.785894 | 4.49347  | 7.350182 |
| 17484670 | Nlrp6     | NLR family, pyrin domain containing 6                                | 64.49476 | 71.29851 | 71.60657 | 84.12834 | 105.2948 | 106.2214 |
| 17475431 | Nlrp9a    | NLR family, pyrin domain containing 9A                               | 3.85433  | 4.871952 | 4.19151  | 4.031481 | 4.549128 | 4.086172 |
| 17474708 | Nlrp9b    | NLR family, pyrin domain containing 9B                               | 3.153295 | 2.641743 | 2.496055 | 2.606493 | 2.878625 | 2.971003 |
| 17488078 | Nlrp9c    | NLR family, pyrin domain containing 9C                               | 2.406006 | 2.451798 | 2.952854 | 2.153525 | 2.344223 | 2.47902  |
| 17398287 | Nmd3      | NMD3 homolog (S. cerevisiae)                                         | 53.46193 | 59.43826 | 41.85767 | 52.41108 | 62.48769 | 57.38533 |
| 17367807 | Nsmf      | NMDA receptor synaptonuclear signaling and neuronal migration factor | 34.89576 | 32.68394 | 41.75451 | 35.77277 | 32.92268 | 30.89454 |
| 17353444 | Nme5      | NME/NM23 family member 5                                             | 5.540899 | 5.210566 | 5.653013 | 5.810571 | 5.040965 | 5.036285 |
| 17218907 | Nme7      | NME/NM23 family member 7                                             | 20.3619  | 20.92796 | 18.49649 | 18.49649 | 16.52399 | 17.17407 |
| 17290871 | Nme8      | NME/NM23 family member 8                                             | 4.307289 | 3.424112 | 3.892238 | 3.706661 | 3.942771 | 3.567467 |
| 17520706 | Nme9      | NME/NM23 family member 9                                             | 3.465347 | 3.72722  | 3.580795 | 3.59243  | 4.098682 | 3.616114 |
| 17267804 | Nme1      | NME/NM23 nucleoside diphosphate kinase 1                             | 93.82757 | 94.70968 | 85.3749  | 96.24502 | 76.75666 | 83.67241 |
| 17267794 | Nme2      | NME/NM23 nucleoside diphosphate kinase 2                             | 35.18796 | 25.99802 | 35.63369 | 31.53714 | 32.04084 | 34.92722 |
| 17334495 | Nme3      | NME/NM23 nucleoside diphosphate kinase 3                             | 38.57542 | 35.32481 | 37.87883 | 35.32481 | 39.89317 | 35.32481 |
| 17342595 | Nme4      | NME/NM23 nucleoside diphosphate kinase 4                             | 16.47367 | 15.79931 | 16.04053 | 17.23047 | 16.36067 | 13.78522 |
| 17522219 | Nme6      | NME/NM23 nucleoside diphosphate kinase 6                             | 23.98665 | 12.86384 | 13.70224 | 13.20452 | 17.07235 | 14.14608 |
| 17248249 | Mpg       | N-methylpurine-DNA glycosylase                                       | 11.8319  | 12.29406 | 12.337   | 12.31248 | 12.61939 | 12.41722 |
| 17327802 | Nmr1l     | NmrA-like family domain containing 1                                 | 11.8808  | 12.63146 | 14.36594 | 16.29605 | 11.79546 | 14.10446 |
| 17385085 | Nmi       | N-myc (and STAT) interactor                                          | 58.51238 | 53.49195 | 59.29054 | 70.0819  | 67.11903 | 65.12773 |
| 17317652 | Ndrp1     | N-myc downstream regulated gene 1                                    | 53.22049 | 41.6721  | 37.67642 | 39.93412 | 32.78059 | 43.74451 |
| 17306147 | Ndrp2     | N-myc downstream regulated gene 2                                    | 838.3448 | 918.1143 | 968.0448 | 1016.159 | 982.4295 | 947.5183 |
| 17393592 | Ndrp3     | N-myc downstream regulated gene 3                                    | 52.1668  | 47.57    | 52.89392 | 41.93317 | 38.71901 | 43.83769 |
| 17504327 | Ndrp4     | N-myc downstream regulated gene 4                                    | 10.89504 | 12.87375 | 11.26714 | 10.74751 | 10.23061 | 11.06852 |
| 17257051 | Nmt1      | N-myristoyltransferase 1                                             | 154.9093 | 153.6187 | 163.6977 | 151.632  | 138.3626 | 152.4973 |
| 17366373 | Nmt2      | N-myristoyltransferase 2                                             | 46.86146 | 64.1817  | 56.24177 | 54.28795 | 46.75731 | 47.79938 |
| 17466476 | Nobox     | NOBOX oogenesis homeobox                                             | 3.515622 | 3.850058 | 4.687732 | 3.659179 | 3.265265 | 3.753353 |
| 17397426 | Noct      | nocturnin                                                            | 16.67887 | 31.03448 | 24.50238 | 13.08498 | 18.65551 | 19.48281 |
| 17233702 | Nodal     | nodal                                                                | 7.6491   | 5.698452 | 5.698452 | 4.428813 | 4.8588   | 5.698452 |
| 17478082 | Nomo1     | nodal modulator 1                                                    | 68.93668 | 57.79128 | 52.6452  | 50.86566 | 52.23627 | 52.49507 |
| 17267656 | Nog       | noggin                                                               | 6.513532 | 6.941368 | 6.688858 | 7.24457  | 6.941368 | 7.702677 |
| 17288387 | Nsun2     | NOL1/NOP2/Sun domain family member 2                                 | 89.34468 | 91.94696 | 87.29396 | 94.77929 | 95.19738 | 83.51017 |
| 17331350 | Nsun3     | NOL1/NOP2/Sun domain family member 3                                 | 56.15996 | 50.9281  | 58.01564 | 52.8298  | 34.48316 | 52.56716 |
| 17381911 | Nsun6     | NOL1/NOP2/Sun domain family member 6                                 | 9.830195 | 8.946169 | 7.768467 | 7.881663 | 7.64629  | 11.05901 |
| 17428529 | Nsun4     | NOL1/NOP2/Sun domain family, member 4                                | 6.028128 | 6.189616 | 6.166706 | 5.299991 | 6.026666 | 5.381581 |
| 17443261 | Nsun5     | NOL1/NOP2/Sun domain family, member 5                                | 17.09864 | 17.09864 | 23.05967 | 18.48906 | 17.09864 | 16.13722 |
| 17437857 | Nsun7     | NOL1/NOP2/Sun domain family, member 7                                | 2.640351 | 2.770161 | 2.378942 | 2.62932  | 3.263862 | 2.606909 |
| 17491454 | Nipa1     | non imprinted in Prader-Willi/Angelman syndrome 1 homolog (human)    | 12.08144 | 11.7317  | 14.52262 | 11.35551 | 13.14261 | 12.59885 |
| 17491440 | Nipa2     | non imprinted in Prader-Willi/Angelman syndrome 2 homolog (human)    | 24.71046 | 27.23462 | 23.40103 | 24.71046 | 22.36127 | 20.59226 |
| 17378287 | a         | nonagouti                                                            | 8.379418 | 8.379418 | 8.379418 | 8.329558 | 8.286139 | 10.04085 |
| 17378296 | a         | nonagouti                                                            | 2.034085 | 1.859429 | 1.943113 | 1.762911 | 1.814523 | 2.141557 |
| 17530128 | Nck1      | non-catalytic region of tyrosine kinase adaptor protein 1            | 38.3903  | 31.0924  | 29.30023 | 30.05764 | 31.74484 | 28.87202 |
| 17212355 | Nck2      | non-catalytic region of tyrosine kinase adaptor protein 2            | 6.028546 | 5.264476 | 5.149884 | 5.149884 | 4.404444 | 5.149884 |
| 17498122 | Nctc1     | non-coding transcript 1                                              | 5.742862 | 4.031705 | 5.54897  | 6.12343  | 4.131226 | 4.855837 |
| 17431429 | Ncmap     | noncompact myelin associated protein                                 | 5.482865 | 6.055726 | 6.171709 | 6.909542 | 6.219247 | 7.189393 |
| 17224440 | Nhej1     | nonhomologous end-joining factor 1                                   | 10.36121 | 11.57965 | 9.889105 | 10.19649 | 9.702322 | 9.090376 |
| 17536742 | Nono      | non-POU-domain-containing, octamer binding protein                   | 120.1306 | 139.9114 | 140.3972 | 133.1151 | 124.0459 | 127.1035 |
| 17370068 | Nron      | non-protein coding RNA, repressor of NFAT                            | 4.389145 | 6.06148  | 6.549342 | 5.069172 | 4.993738 | 5.725335 |
| 17471023 | Ncapd2    | non-SMC condensin I complex, subunit D2                              | 13.53009 | 14.21429 | 17.53238 | 15.76245 | 12.76339 | 11.6459  |
| 17437278 | Ncapg     | non-SMC condensin I complex, subunit G                               | 4.01461  | 4.24637  | 4.598585 | 3.801134 | 3.904425 | 4.567992 |
| 17391212 | Ncaph     | non-SMC condensin I complex, subunit H                               | 3.75494  | 3.591235 | 3.745167 | 3.779643 | 3.667126 | 3.706172 |
| 17515577 | Ncapd3    | non-SMC condensin II complex, subunit D3                             | 23.00858 | 26.32734 | 23.02549 | 25.5606  | 28.82543 | 26.76823 |
| 17279608 | Ncapg2    | non-SMC condensin II complex, subunit G2                             | 4.221308 | 4.684126 | 5.629044 | 3.403101 | 3.990916 | 4.604486 |
| 17314134 | Ncaph2    | non-SMC condensin II complex, subunit H2                             | 44.69526 | 50.00776 | 47.70372 | 47.47156 | 44.69526 | 40.80149 |
| 17340495 | Gm8363    | non-SMC condensin II complex, subunit H2 pseudogene                  | 5.365007 | 6.724281 | 4.09712  | 7.523636 | 7.920656 | 5.690439 |
| 17496049 | Nsmce1    | non-SMC element 1 homolog (S. cerevisiae)                            | 38.60618 | 40.16119 | 40.16119 | 36.35546 | 40.16119 | 33.79435 |
| 17311821 | Nsmce2    | non-SMC element 2 homolog (MMS21, S. cerevisiae)                     | 38.41932 | 37.82583 | 31.25511 | 40.05055 | 52.35553 | 37.05176 |
| 17496989 | Nsmce4a   | non-SMC element 4 homolog A (S. cerevisiae)                          | 51.75692 | 43.03266 | 45.64738 | 64.11544 | 57.05732 | 62.91927 |
| 17488492 | Nccrp1    | non-specific cytotoxic cell receptor protein 1 homolog (zebrafish)   | 13.58074 | 12.29321 | 11.92147 | 11.18722 | 12.79333 | 12.46162 |
| 17374238 | Nop10     | NOP10 ribonucleoprotein                                              | 261.9413 | 265.5777 | 240.1913 | 240.0831 | 245.839  | 294.3543 |
| 17447289 | Nop14     | NOP14 nucleolar protein                                              | 37.6018  | 33.66856 | 30.97602 | 33.76063 | 38.90032 | 34.22313 |
| 17292712 | Nop16     | NOP16 nucleolar protein                                              | 41.62793 | 30.39854 | 40.32353 | 41.0944  | 44.42285 | 34.95653 |
| 17463108 | Nop2      | NOP2 nucleolar protein                                               | 52.28735 | 47.90818 | 46.19709 | 48.78548 | 42.29045 | 48.54329 |
| 17376252 | Nop56     | NOP56 ribonucleoprotein                                              | 37.64823 | 38.31746 | 35.35225 | 33.29445 | 36.82363 | 32.1853  |
| 17376272 | Nop56     | NOP56 ribonucleoprotein                                              | 27.73873 | 25.96111 | 21.20996 | 23.68103 | 43.65515 | 37.79779 |
| 17376274 | Nop56     | NOP56 ribonucleoprotein                                              | 14.59933 | 12.87857 | 13.13523 | 14.12481 | 17.652   | 18.75418 |
| 17213295 | Nop58     | NOP58 ribonucleoprotein                                              | 56.57371 | 57.39368 | 52.33993 | 47.09461 | 51.69382 | 48.06684 |
| 17213315 | Nop58     | NOP58 ribonucleoprotein                                              | 18.55171 | 19.22404 | 17.85963 | 19.70732 | 23.22232 | 22.12522 |
| 17300650 | Nop9      | NOP9 nucleolar protein                                               | 27.45981 | 25.72929 | 24.69128 | 29.0046  | 34.6975  | 27.58783 |
| 17540396 | Ndp       | Norrie disease (pseudoglioma) (human)                                | 4.215168 | 3.668804 | 4.925636 | 4.801649 | 4.307498 | 3.958133 |

|          |               |                                                                                         |          |          |          |          |          |          |
|----------|---------------|-----------------------------------------------------------------------------------------|----------|----------|----------|----------|----------|----------|
| 17383052 | Notch1        | notch 1                                                                                 | 33.06952 | 37.38636 | 41.06849 | 38.22779 | 40.17678 | 39.39471 |
| 17400813 | Notch2        | notch 2                                                                                 | 80.78301 | 82.8259  | 94.72544 | 74.95174 | 85.33999 | 70.87181 |
| 17343299 | Notch3        | notch 3                                                                                 | 10.65619 | 10.93067 | 10.93067 | 9.343869 | 15.49596 | 10.93067 |
| 17336559 | Notch4        | notch 4                                                                                 | 16.66466 | 16.56608 | 18.53667 | 16.06635 | 14.75212 | 16.56608 |
| 17266830 | Nle1          | notchless homolog 1 (Drosophila)                                                        | 14.19617 | 13.13505 | 15.13126 | 17.06691 | 11.40686 | 8.561657 |
| 17367852 | Nrarp         | Notch-regulated ankyrin repeat protein                                                  | 9.833534 | 10.68104 | 9.018828 | 8.239347 | 9.020891 | 10.16543 |
| 17460267 | Noto          | notochord homolog (Xenopus laevis)                                                      | 6.290959 | 4.647871 | 3.559661 | 4.645455 | 4.330609 | 4.511915 |
| 17273260 | Notum         | notum pectinacetyltransferase homolog (Drosophila)                                      | 32.57673 | 33.59187 | 32.39956 | 40.1036  | 30.33455 | 38.44063 |
| 17259443 | Notumos       | notum pectinacetyltransferase homolog (Drosophila), opposite strand [Source:MGI Symbol] | 5.430293 | 4.706191 | 4.767854 | 5.737769 | 5.510755 | 7.478091 |
| 17533183 | B630019K06Rik | novel protein similar to F-box and leucine-rich repeat protein 17 (Fbxl17)              | 8.327191 | 6.171709 | 6.178172 | 6.171709 | 5.161463 | 6.687097 |
| 17260308 | Npc1l1        | NPC1-like 1                                                                             | 6.171709 | 8.818052 | 6.171709 | 6.171709 | 4.954571 | 6.171709 |
| 17283225 | Nrde2         | nrde-2 necessary for RNA interference, domain containing                                | 18.15695 | 15.97717 | 15.75371 | 15.48705 | 15.3241  | 15.48705 |
| 17295270 | Nsa2          | NSA2 ribosome biogenesis homolog (S. cerevisiae)                                        | 236.1386 | 187.542  | 182.8428 | 192.0995 | 198.4635 | 186.124  |
| 17220591 | 5033404E19Rik | NSA2 ribosome biogenesis homolog pseudogene                                             | 4.804346 | 5.65807  | 6.949793 | 6.076708 | 4.889815 | 6.108381 |
| 17377583 | Nsfl1c        | NSFL1 (p97) cofactor (p47)                                                              | 128.2336 | 129.4795 | 116.0031 | 105.9867 | 106.9884 | 111.236  |
| 17220776 | Nsl1          | NSL1, MIND kinetochore complex component, homolog (S. cerevisiae)                       | 3.43731  | 3.648567 | 2.958734 | 3.522061 | 3.788088 | 3.455873 |
| 17272913 | Sgsh          | N-sulfolglucosamine sulfohydrolase (sulfamidase)                                        | 22.33664 | 20.21494 | 22.8666  | 18.02628 | 18.71029 | 20.74296 |
| 17323082 | Ntan1         | N-terminal Asn amidase                                                                  | 28.39589 | 28.66344 | 35.48334 | 32.3331  | 35.01618 | 35.22505 |
| 17423444 | Necab1        | N-terminal EF-hand calcium binding protein 1                                            | 190.6985 | 150.0085 | 134.093  | 137.6442 | 136.2942 | 139.6944 |
| 17506095 | Necab2        | N-terminal EF-hand calcium binding protein 2                                            | 5.05801  | 4.552408 | 4.910228 | 5.054926 | 5.446729 | 4.20927  |
| 17393143 | Necab3        | N-terminal EF-hand calcium binding protein 3                                            | 4.736266 | 4.801649 | 5.553164 | 5.339372 | 4.801649 | 4.4251   |
| 17369271 | Ntmt1         | N-terminal Xaa-Pro-Lys N-methyltransferase 1                                            | 25.36259 | 15.49531 | 18.24539 | 19.35695 | 16.20368 | 17.95931 |
| 17377354 | Nxt1          | NTF2-related export protein 1                                                           | 11.79832 | 13.5845  | 13.5845  | 13.5845  | 12.52189 | 14.00966 |
| 17334356 | Nthl1         | nth (endonuclease III)-like 1 (E.coli)                                                  | 15.02872 | 15.64381 | 13.22513 | 15.02528 | 15.74694 | 15.43764 |
| 17474657 | Nkpd1         | NTPase, KAP family P-loop domain containing 1                                           | 6.42043  | 7.800897 | 6.441247 | 6.25474  | 6.092988 | 6.798752 |
| 17243604 | Nuak1         | NUAK family, SNF1-like kinase, 1                                                        | 11.50086 | 12.9819  | 10.48068 | 11.50086 | 11.54791 | 12.2017  |
| 17217182 | Nuak2         | NUAK family, SNF1-like kinase, 2                                                        | 11.17691 | 16.8302  | 21.05951 | 19.09192 | 23.16669 | 23.91013 |
| 17214948 | Sp100         | nuclear antigen Sp100                                                                   | 25.70897 | 22.61425 | 37.29137 | 28.5083  | 20.82161 | 29.2424  |
| 17214979 | Sp100         | nuclear antigen Sp100                                                                   | 3.703322 | 2.420844 | 3.373719 | 4.280561 | 3.946572 | 4.36197  |
| 17369832 | Naif1         | nuclear apoptosis inducing factor 1                                                     | 15.65531 | 19.4282  | 15.75808 | 17.11228 | 17.01199 | 15.19095 |
| 17501550 | Naf1          | nuclear assembly factor 1 homolog (S. cerevisiae)                                       | 15.35897 | 15.95227 | 15.51165 | 17.14338 | 13.57857 | 13.03808 |
| 17275234 | Gm2027        | nuclear assembly factor 1 homolog pseudogene                                            | 2.62535  | 2.71897  | 2.358795 | 2.369216 | 3.453334 | 3.117069 |
| 17428659 | Nasp          | nuclear autoantigenic sperm protein (histone-binding)                                   | 9.599438 | 12.13271 | 11.75042 | 15.13168 | 13.10023 | 13.05943 |
| 17366185 | LOC100041708  | nuclear body protein SP140-like                                                         | 5.331605 | 4.943867 | 4.33163  | 6.786793 | 3.875789 | 4.850051 |
| 17366201 | LOC101055672  | nuclear body protein SP140-like                                                         | 13.48151 | 19.41366 | 13.40045 | 13.79449 | 18.32321 | 14.94333 |
| 17413789 | Ncbp1         | nuclear cap binding protein subunit 1                                                   | 48.02022 | 41.92678 | 41.77882 | 44.27622 | 34.72638 | 36.25002 |
| 17324722 | Ncbp2         | nuclear cap binding protein subunit 2                                                   | 28.80865 | 32.57854 | 31.0018  | 32.64907 | 33.78826 | 32.8131  |
| 17252557 | Ncbp3         | nuclear cap binding subunit 3                                                           | 24.83822 | 25.69989 | 29.65637 | 25.10008 | 23.97984 | 22.44683 |
| 17217127 | Nucks1        | nuclear casein kinase and cyclin-dependent kinase substrate 1                           | 96.71984 | 115.8456 | 111.5139 | 106.2773 | 133.2083 | 120.5828 |
| 17431036 | Nudc          | nuclear distribution gene C homolog (Aspergillus)                                       | 66.84464 | 62.31467 | 50.2928  | 67.01351 | 64.75053 | 59.23221 |
| 17232120 | Nde1          | nuclear distribution gene E homolog 1 (A. nidulans)                                     | 18.28654 | 15.36036 | 21.18175 | 24.61627 | 17.98796 | 20.12044 |
| 17264424 | Nde1l         | nuclear distribution gene E-like homolog 1 (A. nidulans)                                | 46.21759 | 63.89982 | 55.47093 | 49.29502 | 49.30596 | 59.17066 |
| 17355364 | n-R5-8s1      | nuclear encoded rRNA 5S 1 [Source:MGI Symbol;Acc:MGI:4421735]                           | 1130.378 | 985.6147 | 997.1384 | 1223.408 | 999.9    | 1154.802 |
| 17546790 | n-R5s1        | nuclear encoded rRNA 5S 1 [Source:MGI Symbol;Acc:MGI:4421733]                           | 257.8664 | 266.5403 | 282.4595 | 306.3145 | 319.1498 | 379.6852 |
| 17543085 | n-R5s10       | nuclear encoded rRNA 5S 10 [Source:MGI Symbol;Acc:MGI:4421744]                          | 14.57021 | 19.03972 | 11.57131 | 11.78794 | 12.4007  | 18.66457 |
| 17537901 | n-R5s12       | nuclear encoded rRNA 5S 12 [Source:MGI Symbol;Acc:MGI:4421746]                          | 35.43984 | 21.27858 | 14.00131 | 21.1615  | 21.1615  | 23.9292  |
| 17513974 | n-R5s127      | nuclear encoded rRNA 5S 127 [Source:MGI Symbol;Acc:MGI:4421983]                         | 83.02593 | 76.21061 | 66.19361 | 111.8863 | 89.36141 | 92.58522 |
| 17538742 | n-R5s13       | nuclear encoded rRNA 5S 13 [Source:MGI Symbol;Acc:MGI:4421747]                          | 3.308575 | 3.809786 | 2.483767 | 2.816083 | 1.827574 | 3.214268 |
| 17513976 | n-R5s136      | nuclear encoded rRNA 5S 136                                                             | 2382.037 | 2127.126 | 1833.202 | 2632.997 | 2380.551 | 2416.495 |
| 17538850 | n-R5s14       | nuclear encoded rRNA 5S 14 [Source:MGI Symbol;Acc:MGI:4421748]                          | 5.842031 | 5.502549 | 4.306393 | 7.609017 | 8.925358 | 4.992561 |
| 17538945 | n-R5s15       | nuclear encoded rRNA 5S 15 [Source:MGI Symbol;Acc:MGI:4421749]                          | 2.788076 | 2.553047 | 2.552091 | 1.904761 | 2.373408 | 2.66056  |
| 17473633 | n-R5s150      | nuclear encoded rRNA 5S 150 [Source:MGI Symbol;Acc:MGI:4422012]                         | 2.162035 | 1.898013 | 2.206837 | 2.220785 | 1.661401 | 2.235566 |
| 17474128 | n-R5s151      | nuclear encoded rRNA 5S 151 [Source:MGI Symbol;Acc:MGI:4422013]                         | 955.2801 | 805.8793 | 743.5675 | 955.8961 | 946.7371 | 899.9306 |
| 17487507 | n-R5s152      | nuclear encoded rRNA 5S 152 [Source:MGI Symbol;Acc:MGI:4422015]                         | 6.502435 | 3.927088 | 4.30702  | 3.123298 | 4.292892 | 3.51175  |
| 17488848 | n-R5s153      | nuclear encoded rRNA 5S 153 [Source:MGI Symbol;Acc:MGI:4422016]                         | 2.453243 | 2.100845 | 1.992445 | 2.295725 | 2.307195 | 2.723119 |
| 17492890 | n-R5s154      | nuclear encoded rRNA 5S 154 [Source:MGI Symbol;Acc:MGI:4422017]                         | 2.401507 | 2.120332 | 2.700039 | 3.019584 | 2.21022  | 2.953407 |
| 17480100 | n-R5s155      | nuclear encoded rRNA 5S 155 [Source:MGI Symbol;Acc:MGI:4422018]                         | 5.336375 | 4.377873 | 5.617429 | 3.494098 | 8.626289 | 7.391976 |
| 17480566 | n-R5s156      | nuclear encoded rRNA 5S 156 [Source:MGI Symbol;Acc:MGI:4422019]                         | 397.6347 | 269.9166 | 284.5543 | 353.7828 | 350.2934 | 354.3693 |
| 17495452 | n-R5s157      | nuclear encoded rRNA 5S 157 [Source:MGI Symbol;Acc:MGI:4422020]                         | 2.318578 | 2.269084 | 2.034917 | 2.243312 | 2.650326 | 2.594201 |
| 17496945 | n-R5s158      | nuclear encoded rRNA 5S 158 [Source:MGI Symbol;Acc:MGI:4422021]                         | 4.987511 | 4.486841 | 4.862641 | 4.482644 | 5.170737 | 4.578706 |
| 17484056 | n-R5s159      | nuclear encoded rRNA 5S 159 [Source:MGI Symbol;Acc:MGI:4422022]                         | 2.045509 | 2.060051 | 1.759262 | 2.301748 | 1.804676 | 2.606909 |
| 17539084 | n-R5s16       | nuclear encoded rRNA 5S 16 [Source:MGI Symbol;Acc:MGI:4421750]                          | 31.55376 | 35.14214 | 35.30621 | 49.09588 | 28.99596 | 45.78141 |
| 17456051 | n-R5s160      | nuclear encoded rRNA 5S 160 [Source:MGI Symbol;Acc:MGI:4422024]                         | 6.630281 | 14.82757 | 10.91235 | 12.15451 | 16.4119  | 13.34724 |
| 17456839 | n-R5s161      | nuclear encoded rRNA 5S 161 [Source:MGI Symbol;Acc:MGI:4422025]                         | 8.960194 | 5.316733 | 6.82666  | 7.56993  | 6.336605 | 8.465293 |
| 17459095 | n-R5s162      | nuclear encoded rRNA 5S 162 [Source:MGI Symbol;Acc:MGI:4422026]                         | 354.362  | 354.362  | 267.4935 | 406.8068 | 388.8312 | 371.8843 |
| 17460536 | n-R5s164      | nuclear encoded rRNA 5S 164 [Source:MGI Symbol;Acc:MGI:4422028]                         | 2.593589 | 2.776062 | 2.840254 | 2.682708 | 2.625842 | 3.303534 |
| 17469605 | n-R5s165      | nuclear encoded rRNA 5S 165 [Source:MGI Symbol;Acc:MGI:4422029]                         | 6.556791 | 6.035654 | 6.028546 | 6.171709 | 5.705052 | 7.184262 |
| 17463609 | n-R5s166      | nuclear encoded rRNA 5S 166 [Source:MGI Symbol;Acc:MGI:4422030]                         | 3.418302 | 4.663328 | 4.19942  | 3.701089 | 3.091614 | 3.362397 |
| 17463617 | n-R5s167      | nuclear encoded rRNA 5S 167 [Source:MGI Symbol;Acc:MGI:4422031]                         | 20.54051 | 17.4532  | 12.75897 | 18.94375 | 16.23021 | 14.53239 |
| 17463971 | n-R5s168      | nuclear encoded rRNA 5S 168 [Source:MGI Symbol;Acc:MGI:4422032]                         | 4.005632 | 4.731049 | 4.05418  | 5.549085 | 4.766169 | 5.268528 |
| 17434322 | n-R5s169      | nuclear encoded rRNA 5S 169 [Source:MGI Symbol;Acc:MGI:4422033]                         | 8.536946 | 7.797491 | 7.524105 | 8.580014 | 4.218293 | 11.37031 |
| 17445994 | n-R5s170      | nuclear encoded rRNA 5S 170 [Source:MGI Symbol;Acc:MGI:4422035]                         | 2.741376 | 1.90903  | 2.296521 | 2.47538  | 2.332893 | 2.788521 |
| 17437479 | n-R5s171      | nuclear encoded rRNA 5S 171 [Source:MGI Symbol;Acc:MGI:4422036]                         | 3.614084 | 3.887089 | 4.117875 | 4.610841 | 4.029777 | 5.027147 |
| 17448133 | n-R5s172      | nuclear encoded rRNA 5S 172 [Source:MGI Symbol;Acc:MGI:4422037]                         | 3.230035 | 2.726254 | 3.414892 | 2.42024  | 2.900577 | 2.791151 |
| 17440022 | n-R5s173      | nuclear encoded rRNA 5S 173 [Source:MGI Symbol;Acc:MGI:4422038]                         | 6.333004 | 4.957387 | 5.473714 | 6.287864 | 9.345423 | 8.420524 |
| 17441394 | n-R5s174      | nuclear encoded rRNA 5S 174 [Source:MGI Symbol;Acc:MGI:4422039]                         | 6.95119  | 7.587686 | 8.772634 | 6.815928 | 7.380968 | 10.70988 |
| 17441585 | n-R5s175      | nuclear encoded rRNA 5S 175 [Source:MGI Symbol;Acc:MGI:4422040]                         | 6.992896 | 5.261339 | 7.782372 | 7.498593 | 8.296081 | 6.741175 |
| 17441622 | n-R5s176      | nuclear encoded rRNA 5S 176 [Source:MGI Symbol;Acc:MGI:4422041]                         | 78.74792 | 59.84546 | 41.28455 | 85.96098 | 77.7074  | 88.03468 |
| 17443110 | n-R5s178      | nuclear encoded rRNA 5S 178 [Source:MGI Symbol;Acc:MGI:4422043]                         | 4.07743  | 12.32632 | 7.892323 | 5.0969   | 8.077283 | 8.924368 |
| 17455429 | n-R5s179      | nuclear encoded rRNA 5S 179 [Source:MGI Symbol;Acc:MGI:4422044]                         | 3.193393 | 3.427437 | 3.373462 | 2.873422 | 3.236153 | 3.270724 |
| 17539492 | n-R5s18       | nuclear encoded rRNA 5S 18 [Source:MGI Symbol;Acc:MGI:4421752]                          | 2.623095 | 2.882759 | 2.915291 | 3.162839 | 3.146919 | 3.168654 |
| 17455496 | n-R5s180      | nuclear encoded rRNA 5S 180 [Source:MGI Symbol;Acc:MGI:4422045]                         | 21.56142 | 21.56142 | 20.90708 | 21.56142 | 25.22776 | 21.56142 |
| 17411905 | n-R5s182      | nuclear encoded rRNA 5S 182 [Source:MGI Symbol;Acc:MGI:4422047]                         | 6.739119 | 4.488054 | 3.426629 | 5.190631 | 3.626807 | 4.20927  |
| 17412858 | n-R5s183      | nuclear encoded rRNA 5S 183 [Source:MGI Symbol;Acc:MGI:4422048]                         | 3.075477 | 3.703322 | 2.67402  | 3.703322 | 3.784388 | 3.703322 |

|          |          |                                                                 |          |          |          |          |          |          |
|----------|----------|-----------------------------------------------------------------|----------|----------|----------|----------|----------|----------|
| 17414993 | n-R5s187 | nuclear encoded rRNA 5S 187 [Source:MGI Symbol;Acc:MGI:4422052] | 2.287022 | 2.279472 | 2.32545  | 2.588004 | 2.966866 | 1.920218 |
| 17415001 | n-R5s188 | nuclear encoded rRNA 5S 188 [Source:MGI Symbol;Acc:MGI:4422053] | 2.071779 | 2.045509 | 2.018103 | 2.083357 | 2.093751 | 2.22     |
| 17356670 | n-R5s19  | nuclear encoded rRNA 5S 19 [Source:MGI Symbol;Acc:MGI:4421753]  | 3.883991 | 3.883991 | 4.615606 | 4.072317 | 2.871969 | 3.229006 |
| 17428251 | n-R5s191 | nuclear encoded rRNA 5S 191 [Source:MGI Symbol;Acc:MGI:4422056] | 4.414653 | 4.367265 | 5.619922 | 6.211493 | 10.35288 | 6.76275  |
| 17418355 | n-R5s192 | nuclear encoded rRNA 5S 192 [Source:MGI Symbol;Acc:MGI:4422057] | 3.254938 | 4.678934 | 2.215113 | 3.031916 | 5.552394 | 3.014043 |
| 17421856 | n-R5s193 | nuclear encoded rRNA 5S 193 [Source:MGI Symbol;Acc:MGI:4422058] | 145.4813 | 125.431  | 139.4912 | 152.9695 | 123.3215 | 136.7313 |
| 17395971 | n-R5s194 | nuclear encoded rRNA 5S 194 [Source:MGI Symbol;Acc:MGI:4422059] | 2.068393 | 2.238714 | 1.215187 | 2.591756 | 5.270217 | 2.052099 |
| 17404963 | n-R5s195 | nuclear encoded rRNA 5S 195 [Source:MGI Symbol;Acc:MGI:4422060] | 6.240406 | 4.949593 | 4.39091  | 5.424311 | 6.767251 | 5.004237 |
| 17397492 | n-R5s196 | nuclear encoded rRNA 5S 196 [Source:MGI Symbol;Acc:MGI:4422061] | 12.36465 | 6.763922 | 5.206306 | 7.810094 | 7.159555 | 7.020433 |
| 17399235 | n-R5s197 | nuclear encoded rRNA 5S 197 [Source:MGI Symbol;Acc:MGI:4422062] | 12.61913 | 16.65889 | 9.605029 | 13.33911 | 11.83444 | 14.35877 |
| 17386683 | n-R5s198 | nuclear encoded rRNA 5S 198 [Source:MGI Symbol;Acc:MGI:4422063] | 3.040608 | 2.18392  | 2.133157 | 3.263862 | 3.00649  | 2.421498 |
| 17532737 | n-R5s2   | nuclear encoded rRNA 5S 2 [Source:MGI Symbol;Acc:MGI:4421736]   | 10.5089  | 8.14983  | 9.976958 | 15.3394  | 14.96728 | 12.36868 |
| 17387502 | n-R5s200 | nuclear encoded rRNA 5S 200 [Source:MGI Symbol;Acc:MGI:4422065] | 4.804679 | 4.339654 | 5.422845 | 5.401275 | 4.747671 | 4.81011  |
| 17373994 | n-R5s201 | nuclear encoded rRNA 5S 201 [Source:MGI Symbol;Acc:MGI:4422066] | 2.386341 | 1.982719 | 2.057696 | 2.252489 | 2.45852  | 2.257725 |
| 17389333 | n-R5s202 | nuclear encoded rRNA 5S 202 [Source:MGI Symbol;Acc:MGI:4422067] | 3.339703 | 4.20927  | 3.339703 | 3.412124 | 3.621883 | 3.339703 |
| 17374848 | n-R5s204 | nuclear encoded rRNA 5S 204 [Source:MGI Symbol;Acc:MGI:4422069] | 10.91946 | 10.41904 | 4.43259  | 4.776024 | 10.56382 | 7.417227 |
| 17390261 | n-R5s205 | nuclear encoded rRNA 5S 205 [Source:MGI Symbol;Acc:MGI:4422070] | 2.696878 | 3.055948 | 2.94066  | 3.452497 | 3.247906 | 3.551011 |
| 17394100 | n-R5s207 | nuclear encoded rRNA 5S 207 [Source:MGI Symbol;Acc:MGI:4422072] | 3.003116 | 3.292583 | 2.230968 | 2.393298 | 3.220958 | 2.905809 |
| 17221923 | n-R5s209 | nuclear encoded rRNA 5S 209 [Source:MGI Symbol;Acc:MGI:4422074] | 26.37538 | 34.14494 | 18.69758 | 36.52722 | 23.61596 | 31.12517 |
| 17359676 | n-R5s21  | nuclear encoded rRNA 5S 21 [Source:MGI Symbol;Acc:MGI:4421755]  | 3.204568 | 2.320813 | 2.733558 | 2.480928 | 2.887618 | 2.958919 |
| 17211883 | n-R5s210 | nuclear encoded rRNA 5S 210 [Source:MGI Symbol;Acc:MGI:4422075] | 2.36897  | 2.169692 | 2.283347 | 3.091914 | 2.568489 | 2.57521  |
| 17214823 | n-R5s213 | nuclear encoded rRNA 5S 213 [Source:MGI Symbol;Acc:MGI:4422078] | 23.11392 | 9.447417 | 10.36214 | 18.15318 | 21.94499 | 20.65244 |
| 17224952 | n-R5s214 | nuclear encoded rRNA 5S 214 [Source:MGI Symbol;Acc:MGI:4422079] | 2.67402  | 2.262974 | 2.350113 | 2.083357 | 2.262974 | 2.00172  |
| 17225988 | n-R5s216 | nuclear encoded rRNA 5S 216 [Source:MGI Symbol;Acc:MGI:4422081] | 1.942857 | 1.988086 | 2.011651 | 2.124068 | 2.260419 | 2.36043  |
| 17227614 | n-R5s217 | nuclear encoded rRNA 5S 217 [Source:MGI Symbol;Acc:MGI:4422082] | 6.348475 | 5.046489 | 5.469011 | 5.527703 | 4.684851 | 6.884682 |
| 17227826 | n-R5s218 | nuclear encoded rRNA 5S 218 [Source:MGI Symbol;Acc:MGI:4422083] | 2.143146 | 2.065513 | 2.421465 | 2.314499 | 2.197785 | 3.221695 |
| 17218058 | n-R5s219 | nuclear encoded rRNA 5S 219 [Source:MGI Symbol;Acc:MGI:4422084] | 3.097169 | 1.998767 | 2.386274 | 2.722647 | 2.523997 | 2.419284 |
| 17228291 | n-R5s220 | nuclear encoded rRNA 5S 220 [Source:MGI Symbol;Acc:MGI:4422085] | 3.328795 | 3.147748 | 2.70474  | 2.466183 | 3.833893 | 2.57596  |
| 17353167 | n-R5s23  | nuclear encoded rRNA 5S 23 [Source:MGI Symbol;Acc:MGI:4421758]  | 3.611905 | 4.20927  | 2.362935 | 2.056242 | 3.23603  | 2.972527 |
| 17349421 | n-R5s24  | nuclear encoded rRNA 5S 24 [Source:MGI Symbol;Acc:MGI:4421759]  | 4.882331 | 5.457083 | 3.486864 | 3.460955 | 4.622842 | 5.167477 |
| 17332891 | n-R5s26  | nuclear encoded rRNA 5S 26 [Source:MGI Symbol;Acc:MGI:4421871]  | 3.379009 | 3.978791 | 4.20927  | 3.881865 | 3.780822 | 3.684631 |
| 17345150 | n-R5s27  | nuclear encoded rRNA 5S 27 [Source:MGI Symbol;Acc:MGI:4421872]  | 2.400606 | 2.234652 | 2.285991 | 2.144453 | 2.232794 | 3.014461 |
| 17338353 | n-R5s28  | nuclear encoded rRNA 5S 28 [Source:MGI Symbol;Acc:MGI:4421873]  | 114.1178 | 57.21534 | 45.5434  | 87.68511 | 97.07649 | 90.62455 |
| 17339852 | n-R5s29  | nuclear encoded rRNA 5S 29 [Source:MGI Symbol;Acc:MGI:4421874]  | 3.56497  | 3.190118 | 4.4469   | 3.920914 | 3.290279 | 6.168587 |
| 17540323 | n-R5s3   | nuclear encoded rRNA 5S 3 [Source:MGI Symbol;Acc:MGI:4421737]   | 27.56164 | 18.78267 | 35.32359 | 27.54064 | 17.90288 | 34.41916 |
| 17327972 | n-R5s30  | nuclear encoded rRNA 5S 30 [Source:MGI Symbol;Acc:MGI:4421875]  | 1.811168 | 2.70399  | 2.623877 | 2.571143 | 3.029501 | 2.166941 |
| 17328482 | n-R5s31  | nuclear encoded rRNA 5S 31 [Source:MGI Symbol;Acc:MGI:4421876]  | 3.244891 | 3.274989 | 2.67402  | 3.044531 | 3.680368 | 3.907322 |
| 17329622 | n-R5s32  | nuclear encoded rRNA 5S 32 [Source:MGI Symbol;Acc:MGI:4421877]  | 3.468063 | 3.836073 | 2.962572 | 3.154169 | 2.962572 | 3.39469  |
| 17324959 | n-R5s33  | nuclear encoded rRNA 5S 33 [Source:MGI Symbol;Acc:MGI:4421878]  | 556.7902 | 506.3601 | 471.8322 | 577.4331 | 552.971  | 563.0815 |
| 17325531 | n-R5s34  | nuclear encoded rRNA 5S 34 [Source:MGI Symbol;Acc:MGI:4421879]  | 2.436601 | 2.059623 | 2.106941 | 2.230829 | 2.332634 | 2.106941 |
| 17330803 | n-R5s36  | nuclear encoded rRNA 5S 36 [Source:MGI Symbol;Acc:MGI:4421881]  | 3.28727  | 2.191092 | 2.255364 | 1.868927 | 2.241431 | 2.580767 |
| 17331348 | n-R5s37  | nuclear encoded rRNA 5S 37 [Source:MGI Symbol;Acc:MGI:4421882]  | 1.833042 | 1.751232 | 1.787954 | 1.999667 | 2.457038 | 1.843976 |
| 17316735 | n-R5s39  | nuclear encoded rRNA 5S 39 [Source:MGI Symbol;Acc:MGI:4421884]  | 2.953407 | 2.814093 | 2.835789 | 3.625374 | 2.858127 | 3.240688 |
| 17313037 | n-R5s40  | nuclear encoded rRNA 5S 40 [Source:MGI Symbol;Acc:MGI:4421885]  | 3.042232 | 4.097546 | 3.829962 | 5.548256 | 3.400455 | 3.420175 |
| 17313575 | n-R5s41  | nuclear encoded rRNA 5S 41 [Source:MGI Symbol;Acc:MGI:4421886]  | 2.938195 | 2.446586 | 2.339256 | 3.117479 | 2.574764 | 3.134684 |
| 17313974 | n-R5s42  | nuclear encoded rRNA 5S 42 [Source:MGI Symbol;Acc:MGI:4421887]  | 4.381759 | 5.143891 | 4.980291 | 4.208949 | 6.303705 | 6.347815 |
| 17315031 | n-R5s43  | nuclear encoded rRNA 5S 43 [Source:MGI Symbol;Acc:MGI:4421888]  | 2.347248 | 2.359318 | 2.481049 | 2.118099 | 2.827486 | 2.841751 |
| 17303536 | n-R5s45  | nuclear encoded rRNA 5S 45 [Source:MGI Symbol;Acc:MGI:4421890]  | 5.501748 | 3.748959 | 3.836073 | 4.31461  | 3.197778 | 4.878914 |
| 17305114 | n-R5s46  | nuclear encoded rRNA 5S 46 [Source:MGI Symbol;Acc:MGI:4421891]  | 23.90483 | 16.95877 | 22.57368 | 24.86837 | 24.58847 | 27.78145 |
| 17301190 | n-R5s47  | nuclear encoded rRNA 5S 47 [Source:MGI Symbol;Acc:MGI:4421892]  | 4.182832 | 5.938671 | 5.241937 | 5.241937 | 5.989103 | 4.94517  |
| 17302136 | n-R5s48  | nuclear encoded rRNA 5S 48 [Source:MGI Symbol;Acc:MGI:4421893]  | 9.777394 | 9.294775 | 5.140291 | 8.818724 | 8.069224 | 8.827742 |
| 17540434 | n-R5s5   | nuclear encoded rRNA 5S 5 [Source:MGI Symbol;Acc:MGI:4421739]   | 3.002387 | 3.268208 | 2.050165 | 2.024927 | 3.706609 | 2.213133 |
| 17302594 | n-R5s50  | nuclear encoded rRNA 5S 50 [Source:MGI Symbol;Acc:MGI:4421895]  | 197.5755 | 195.8561 | 203.5614 | 240.8348 | 189.3419 | 257.9558 |
| 17309455 | n-R5s51  | nuclear encoded rRNA 5S 51 [Source:MGI Symbol;Acc:MGI:4421896]  | 5.502244 | 4.20927  | 4.20927  | 4.620311 | 4.147638 | 4.20927  |
| 17290736 | n-R5s52  | nuclear encoded rRNA 5S 52 [Source:MGI Symbol;Acc:MGI:4421897]  | 3.462322 | 3.462322 | 3.897314 | 3.462322 | 3.383837 | 3.060548 |
| 17292632 | n-R5s54  | nuclear encoded rRNA 5S 54 [Source:MGI Symbol;Acc:MGI:4421899]  | 8.500278 | 5.648783 | 5.022271 | 5.648783 | 4.90822  | 4.451989 |
| 17289549 | n-R5s56  | nuclear encoded rRNA 5S 56 [Source:MGI Symbol;Acc:MGI:4421901]  | 7.120655 | 2.335805 | 4.724822 | 5.774316 | 4.915506 | 6.143071 |
| 17281079 | n-R5s58  | nuclear encoded rRNA 5S 58 [Source:MGI Symbol;Acc:MGI:4421903]  | 2.225208 | 2.342989 | 2.32795  | 2.269697 | 2.558982 | 2.346938 |
| 17534669 | n-R5s6   | nuclear encoded rRNA 5S 6 [Source:MGI Symbol;Acc:MGI:4421740]   | 5.975627 | 6.633039 | 6.175945 | 5.738048 | 6.164953 | 5.366866 |
| 17281479 | n-R5s60  | nuclear encoded rRNA 5S 60 [Source:MGI Symbol;Acc:MGI:4421905]  | 3.891186 | 3.320867 | 3.682588 | 3.532109 | 3.386535 | 3.94023  |
| 17275873 | n-R5s61  | nuclear encoded rRNA 5S 61 [Source:MGI Symbol;Acc:MGI:4421906]  | 2.777352 | 2.836241 | 2.156333 | 2.494499 | 1.779041 | 3.019082 |
| 17276983 | n-R5s62  | nuclear encoded rRNA 5S 62 [Source:MGI Symbol;Acc:MGI:4421907]  | 11.01242 | 13.06568 | 12.08847 | 10.62808 | 17.18776 | 13.06568 |
| 17282395 | n-R5s63  | nuclear encoded rRNA 5S 63 [Source:MGI Symbol;Acc:MGI:4421908]  | 2.247156 | 2.420844 | 2.335417 | 2.409594 | 2.729847 | 2.371139 |
| 17282730 | n-R5s64  | nuclear encoded rRNA 5S 64 [Source:MGI Symbol;Acc:MGI:4421909]  | 29.64589 | 33.51767 | 22.61127 | 25.21971 | 32.15743 | 26.62778 |
| 17277754 | n-R5s65  | nuclear encoded rRNA 5S 65 [Source:MGI Symbol;Acc:MGI:4421910]  | 7.467421 | 5.065238 | 4.199827 | 3.455274 | 7.070244 | 4.166136 |
| 17247078 | n-R5s67  | nuclear encoded rRNA 5S 67 [Source:MGI Symbol;Acc:MGI:4421912]  | 2.33278  | 2.036356 | 2.469656 | 2.584365 | 3.345032 | 2.078352 |
| 17247927 | n-R5s68  | nuclear encoded rRNA 5S 68 [Source:MGI Symbol;Acc:MGI:4421913]  | 6.992896 | 6.992896 | 8.918926 | 9.908386 | 7.209804 | 6.980885 |
| 17249916 | n-R5s69  | nuclear encoded rRNA 5S 69 [Source:MGI Symbol;Acc:MGI:4421914]  | 21.94226 | 22.25442 | 22.71447 | 18.69797 | 19.84674 | 20.00654 |
| 17542133 | n-R5s7   | nuclear encoded rRNA 5S 7 [Source:MGI Symbol;Acc:MGI:4421741]   | 2.947598 | 4.502543 | 2.789139 | 4.383004 | 2.842007 | 3.469385 |
| 17252339 | n-R5s70  | nuclear encoded rRNA 5S 70 [Source:MGI Symbol;Acc:MGI:4421915]  | 62.25207 | 36.79455 | 41.08216 | 80.87153 | 37.04508 | 59.93804 |
| 17252754 | n-R5s71  | nuclear encoded rRNA 5S 71 [Source:MGI Symbol;Acc:MGI:4421916]  | 391.4434 | 398.6586 | 346.2907 | 427.9208 | 379.0068 | 394.6719 |
| 17267700 | n-R5s72  | nuclear encoded rRNA 5S 72 [Source:MGI Symbol;Acc:MGI:4421917]  | 5.106731 | 5.124602 | 6.33946  | 4.271729 | 5.124602 | 5.163896 |
| 17268784 | n-R5s73  | nuclear encoded rRNA 5S 73 [Source:MGI Symbol;Acc:MGI:4421918]  | 1.804051 | 2.090561 | 1.801602 | 1.898013 | 1.843733 | 2.017222 |
| 17272337 | n-R5s74  | nuclear encoded rRNA 5S 74 [Source:MGI Symbol;Acc:MGI:4421919]  | 2.406006 | 2.874259 | 3.183977 | 2.957032 | 4.442063 | 2.933677 |
| 17240087 | n-R5s76  | nuclear encoded rRNA 5S 76 [Source:MGI Symbol;Acc:MGI:4421924]  | 8.101449 | 9.706828 | 8.236378 | 9.264352 | 10.20497 | 11.38206 |
| 17234798 | n-R5s77  | nuclear encoded rRNA 5S 77 [Source:MGI Symbol;Acc:MGI:4421925]  | 4.712557 | 3.410776 | 5.35082  | 4.239517 | 2.058338 | 6.347815 |
| 17243953 | n-R5s79  | nuclear encoded rRNA 5S 79 [Source:MGI Symbol;Acc:MGI:4421927]  | 32.50748 | 30.16618 | 31.6155  | 33.94624 | 38.48755 | 33.14318 |
| 17535296 | n-R5s8   | nuclear encoded rRNA 5S 8 [Source:MGI Symbol;Acc:MGI:4421742]   | 2.255895 | 2.406006 | 2.290559 | 3.02694  | 2.876611 | 2.947169 |
| 17244693 | n-R5s80  | nuclear encoded rRNA 5S 80 [Source:MGI Symbol;Acc:MGI:4421928]  | 6.513171 | 4.791542 | 6.287864 | 6.882773 | 5.320235 | 10.29855 |
| 17516028 | n-R5s82  | nuclear encoded rRNA 5S 82 [Source:MGI Symbol;Acc:MGI:4421930]  | 2.830702 | 2.674353 | 2.690268 | 3.329141 | 5.303662 | 3.128237 |
| 17518189 | n-R5s84  | nuclear encoded rRNA 5S 84 [Source:MGI Symbol;Acc:MGI:4421932]  | 4.759797 | 6.797197 | 4.834779 | 4.821126 | 4.759797 | 5.36285  |
| 17518634 | n-R5s85  | nuclear encoded rRNA 5S 85 [Source:MGI Symbol;Acc:MGI:4421933]  | 2.806982 | 3.781451 | 3.258505 | 4.366659 | 2.785218 | 2.953407 |
| 17519314 | n-R5s86  | nuclear encoded rRNA 5S 86 [Source:MGI Symbol;Acc:MGI:4421934]  | 8.638555 | 6.243565 | 6.605699 | 6.201469 | 8.915712 | 9.10204  |
| 17529842 | n-R5s87  | nuclear encoded rRNA 5S 87 [Source:MGI Symbol;Acc:MGI:4421935]  | 2.090242 | 2.220524 | 2.264873 | 2.251147 | 1.882787 | 2.366344 |

|          |               |                                                                                       |          |          |          |          |          |          |
|----------|---------------|---------------------------------------------------------------------------------------|----------|----------|----------|----------|----------|----------|
| 17530227 | n-R5s89       | nuclear encoded rRNA 5S 89 [Source:MGI Symbol;Acc:MGI:4421937]                        | 416.0174 | 293.7938 | 348.2815 | 462.8946 | 349.1565 | 458.364  |
| 17536163 | n-R5s9        | nuclear encoded rRNA 5S 9 [Source:MGI Symbol;Acc:MGI:4421743]                         | 3.883991 | 3.883991 | 3.883991 | 3.617818 | 3.797974 | 3.729055 |
| 17531749 | n-R5s90       | nuclear encoded rRNA 5S 90 [Source:MGI Symbol;Acc:MGI:4421938]                        | 2.704965 | 3.22069  | 3.602254 | 3.643437 | 3.180867 | 3.446161 |
| 17531981 | n-R5s92       | nuclear encoded rRNA 5S 92 [Source:MGI Symbol;Acc:MGI:4421940]                        | 5.338965 | 20.79983 | 14.7078  | 18.49649 | 17.15836 | 16.56608 |
| 17507306 | n-R5s93       | nuclear encoded rRNA 5S 93 [Source:MGI Symbol;Acc:MGI:4421941]                        | 5.127267 | 3.563883 | 4.20927  | 5.772675 | 3.354528 | 3.752469 |
| 17507317 | n-R5s94       | nuclear encoded rRNA 5S 94 [Source:MGI Symbol;Acc:MGI:4421942]                        | 4.058341 | 3.117328 | 3.009972 | 3.207124 | 3.30548  | 3.712369 |
| 17507353 | n-R5s95       | nuclear encoded rRNA 5S 95 [Source:MGI Symbol;Acc:MGI:4421943]                        | 1.924508 | 1.837686 | 2.002525 | 2.031845 | 2.064053 | 2.202589 |
| 17501094 | n-R5s96       | nuclear encoded rRNA 5S 96 [Source:MGI Symbol;Acc:MGI:4421944]                        | 4.974805 | 3.916541 | 4.257186 | 5.670398 | 4.043992 | 5.024326 |
| 17501102 | n-R5s97       | nuclear encoded rRNA 5S 97 [Source:MGI Symbol;Acc:MGI:4421945]                        | 3.462322 | 2.932904 | 2.322406 | 5.073355 | 3.603128 | 3.134488 |
| 17501202 | n-R5s98       | nuclear encoded rRNA 5S 98 [Source:MGI Symbol;Acc:MGI:4421946]                        | 25.16593 | 24.31121 | 27.89646 | 22.95601 | 29.72304 | 31.13186 |
| 17281529 | Nemf          | nuclear export mediator factor                                                        | 41.7962  | 36.03458 | 30.4348  | 28.65411 | 34.70063 | 36.03458 |
| 17415606 | Nfia          | nuclear factor I/A                                                                    | 53.6758  | 69.5708  | 74.41079 | 55.05837 | 69.29935 | 56.8406  |
| 17426765 | Nfib          | nuclear factor I/B                                                                    | 207.6889 | 265.4378 | 276.338  | 219.3423 | 230.1132 | 251.2762 |
| 17243330 | Nfic          | nuclear factor I/C                                                                    | 66.94944 | 76.88232 | 80.81437 | 73.62634 | 67.76648 | 76.13458 |
| 17511142 | Nfix          | nuclear factor I/X                                                                    | 43.876   | 39.23692 | 47.64325 | 39.63354 | 40.61413 | 42.13859 |
| 17505260 | Nfat5         | nuclear factor of activated T cells 5                                                 | 31.66309 | 49.32134 | 47.70042 | 37.97689 | 32.12557 | 31.61637 |
| 17355670 | Nfatc1        | nuclear factor of activated T cells, cytoplasmic, calcineurin dependent 1             | 27.81999 | 29.9273  | 32.9131  | 31.24081 | 24.07927 | 29.64835 |
| 17394806 | Nfatc2        | nuclear factor of activated T cells, cytoplasmic, calcineurin dependent 2             | 9.640313 | 10.01479 | 9.933898 | 10.17827 | 9.810455 | 11.93544 |
| 17496183 | Nfatc2ip      | nuclear factor of activated T cells, cytoplasmic, calcineurin dependent 2 interacting | 9.126046 | 11.12621 | 7.379024 | 8.204014 | 11.18691 | 9.759316 |
| 17505034 | Nfatc3        | nuclear factor of activated T cells, cytoplasmic, calcineurin dependent 3             | 62.81294 | 61.12582 | 60.86327 | 62.5644  | 68.85025 | 59.52237 |
| 17300672 | Nfatc4        | nuclear factor of activated T cells, cytoplasmic, calcineurin dependent 4             | 11.39927 | 11.53519 | 11.39927 | 11.39927 | 11.39927 | 9.956302 |
| 17410542 | Nfkb1         | nuclear factor of kappa light polypeptide gene enhancer in B cells 1, p105            | 55.72721 | 50.68019 | 73.05191 | 53.29987 | 54.07538 | 56.8879  |
| 17359967 | Nfkb2         | nuclear factor of kappa light polypeptide gene enhancer in B cells 2, p49/p100        | 18.69979 | 17.38728 | 22.36297 | 22.59795 | 21.0528  | 18.2215  |
| 17344322 | Nfkbil1       | nuclear factor of kappa light polypeptide gene enhancer in B cells inhibitor like 1   | 14.47268 | 14.5689  | 15.79701 | 14.85061 | 11.79865 | 14.41131 |
| 17281219 | Nfkbia        | nuclear factor of kappa light polypeptide gene enhancer in B cells inhibitor, alpha   | 83.08119 | 99.65429 | 98.56886 | 79.84112 | 109.3235 | 118.12   |
| 17488544 | Nfkbib        | nuclear factor of kappa light polypeptide gene enhancer in B cells inhibitor, beta    | 51.99857 | 51.79604 | 57.04466 | 52.07756 | 51.57464 | 51.67448 |
| 17476372 | Nfkbid        | nuclear factor of kappa light polypeptide gene enhancer in B cells inhibitor, delta   | 6.007897 | 6.162689 | 6.177829 | 7.812802 | 6.463609 | 5.813069 |
| 17337927 | Nfkbie        | nuclear factor of kappa light polypeptide gene enhancer in B cells inhibitor, epsilon | 7.319423 | 9.324911 | 9.086911 | 7.372327 | 8.113419 | 9.332477 |
| 17330967 | Nfkbiz        | nuclear factor of kappa light polypeptide gene enhancer in B cells inhibitor, zeta    | 13.35983 | 16.22448 | 15.49596 | 17.06608 | 14.01422 | 16.73272 |
| 17515758 | Nfrkb         | nuclear factor related to kappa B binding protein                                     | 23.3853  | 33.08488 | 33.24142 | 26.58997 | 29.76737 | 27.63453 |
| 17322337 | Nfe2          | nuclear factor, erythroid derived 2                                                   | 3.789953 | 4.167436 | 4.068621 | 4.206791 | 3.783627 | 3.967857 |
| 17386700 | Nfe2l2        | nuclear factor, erythroid derived 2, like 2                                           | 152.1457 | 163.4403 | 151.8118 | 120.0124 | 120.9964 | 120.5009 |
| 17458550 | Nfe2l3        | nuclear factor, erythroid derived 2, like 3                                           | 8.487031 | 7.384755 | 8.763213 | 7.76486  | 8.499512 | 10.69356 |
| 17268356 | Nfe2l1        | nuclear factor, erythroid derived 2, like 1                                           | 51.01572 | 57.09451 | 70.81289 | 55.46478 | 54.60761 | 62.84386 |
| 17292634 | Nfil3         | nuclear factor, interleukin 3, regulated                                              | 57.70082 | 27.74258 | 31.71141 | 31.29434 | 35.09516 | 34.66866 |
| 17302061 | Nufip1        | nuclear fragile X mental retardation protein interacting protein 1                    | 17.64992 | 17.09355 | 17.60935 | 19.71921 | 19.85637 | 19.22991 |
| 17253307 | Nufip2        | nuclear fragile X mental retardation protein interacting protein 2                    | 49.18444 | 49.09452 | 49.18444 | 51.73756 | 42.63836 | 49.18444 |
| 17301391 | Nuggc         | nuclear GTPase, germinal center associated                                            | 3.883991 | 3.89356  | 3.494316 | 3.883991 | 4.375901 | 4.067832 |
| 17505239 | Nip7          | nuclear import 7 homolog (S. cerevisiae)                                              | 30.2449  | 32.12134 | 31.99268 | 36.65048 | 33.81215 | 34.32648 |
| 17480986 | Numa1         | nuclear mitotic apparatus protein 1                                                   | 68.76965 | 70.75646 | 75.1541  | 66.30565 | 72.65398 | 69.90773 |
| 17361805 | Neat1         | nuclear paraspeckle assembly transcript 1 (non-protein coding)                        | 83.04952 | 189.6269 | 195.1338 | 172.6157 | 161.0629 | 142.02   |
| 17453557 | Pom121        | nuclear pore membrane protein 121                                                     | 49.1991  | 47.83451 | 51.26705 | 40.18848 | 43.1641  | 33.80465 |
| 17259585 | Narf          | nuclear prelamin A recognition factor                                                 | 59.83219 | 58.66304 | 56.96129 | 49.99979 | 51.49855 | 58.33824 |
| 17334749 | Narfl         | nuclear prelamin A recognition factor-like                                            | 35.78096 | 35.4143  | 29.88376 | 37.70803 | 29.09542 | 33.39662 |
| 17517323 | Npat          | nuclear protein in the AT region                                                      | 18.19866 | 16.38598 | 14.43921 | 19.60827 | 18.84043 | 13.56672 |
| 17273086 | Nploc4        | nuclear protein localization 4 homolog (S. cerevisiae)                                | 309.531  | 300.5539 | 297.2556 | 276.6657 | 213.6285 | 220.8159 |
| 17496345 | Nupr1         | nuclear protein transcription regulator 1                                             | 20.92448 | 28.99696 | 38.53106 | 20.5884  | 22.10346 | 22.95681 |
| 17442966 | Nupr1l        | nuclear protein transcriptional regulator 1 like                                      | 12.13044 | 11.50086 | 11.20546 | 11.35417 | 11.6363  | 12.5814  |
| 17501810 | Nr2c2ap       | nuclear receptor 2C2-associated protein                                               | 18.36287 | 15.85285 | 13.18294 | 13.53901 | 14.02725 | 15.45348 |
| 17241637 | Nrbf2         | nuclear receptor binding factor 2                                                     | 70.56447 | 69.11467 | 59.88488 | 65.88052 | 70.45499 | 68.31072 |
| 17436077 | Nrbp1         | nuclear receptor binding protein 1                                                    | 158.1347 | 128.4755 | 119.4315 | 135.929  | 145.6831 | 137.7883 |
| 17318312 | Nrbp2         | nuclear receptor binding protein 2                                                    | 45.91648 | 51.49249 | 59.09688 | 47.96433 | 45.29469 | 48.80713 |
| 17279805 | Ncoa1         | nuclear receptor coactivator 1                                                        | 57.47689 | 57.47689 | 57.36504 | 51.50248 | 57.43905 | 57.47689 |
| 17279830 | Ncoa1         | nuclear receptor coactivator 1                                                        | 8.330886 | 7.728241 | 10.78796 | 7.45196  | 8.350369 | 7.255827 |
| 17221317 | Ncoa2         | nuclear receptor coactivator 2                                                        | 86.60389 | 107.9411 | 105.8972 | 84.48305 | 99.15956 | 103.4859 |
| 17320858 | D030018L15Rik | nuclear receptor coactivator 2 pseudogene                                             | 4.147839 | 3.235862 | 3.68343  | 3.601006 | 2.667559 | 3.197269 |
| 17379719 | Ncoa3         | nuclear receptor coactivator 3                                                        | 48.2946  | 47.33253 | 55.66814 | 47.4064  | 44.83178 | 45.5494  |
| 17298510 | Ncoa4         | nuclear receptor coactivator 4                                                        | 26.20155 | 25.62944 | 25.36136 | 20.62854 | 24.15433 | 20.08087 |
| 17394349 | Ncoa5         | nuclear receptor coactivator 5                                                        | 34.30365 | 28.56111 | 26.23335 | 21.4636  | 21.4636  | 24.79539 |
| 17393244 | Ncoa6         | nuclear receptor coactivator 6                                                        | 45.48377 | 65.98655 | 57.06997 | 67.4539  | 49.5389  | 48.01855 |
| 17240053 | Ncoa7         | nuclear receptor coactivator 7                                                        | 12.42824 | 11.62872 | 15.23914 | 12.84469 | 15.26431 | 11.11665 |
| 17263959 | Ncor1         | nuclear receptor co-repressor 1                                                       | 147.4672 | 160.0923 | 170.5274 | 155.0597 | 144.7912 | 148.9743 |
| 17452897 | Ncor2         | nuclear receptor co-repressor 2                                                       | 41.66257 | 46.36486 | 56.9309  | 54.43339 | 48.52479 | 45.50932 |
| 17331564 | Nrip1         | nuclear receptor interacting protein 1                                                | 48.48041 | 61.19068 | 60.26673 | 47.4064  | 41.70447 | 43.36082 |
| 17463422 | Nrip2         | nuclear receptor interacting protein 2                                                | 11.33506 | 10.19818 | 10.68778 | 9.647064 | 10.91038 | 14.05294 |
| 17494940 | Nrip3         | nuclear receptor interacting protein 3                                                | 4.577437 | 3.372574 | 2.979975 | 4.912917 | 4.627972 | 3.489161 |
| 17536201 | Nr0b1         | nuclear receptor subfamily 0, group B, member 1                                       | 2.747806 | 2.488351 | 2.824509 | 2.804104 | 2.529286 | 2.630195 |
| 17419622 | Nr0b2         | nuclear receptor subfamily 0, group B, member 2                                       | 106.8216 | 47.157   | 44.15852 | 117.9613 | 75.97696 | 92.06813 |
| 17268884 | Nr1d1         | nuclear receptor subfamily 1, group D, member 1                                       | 71.28615 | 166.1209 | 166.2695 | 130.3024 | 144.6678 | 195.9104 |
| 17303625 | Nr1d2         | nuclear receptor subfamily 1, group D, member 2                                       | 50.56124 | 108.1013 | 86.31025 | 74.98084 | 101.2866 | 104.14   |
| 17490312 | Nr1h2         | nuclear receptor subfamily 1, group H, member 2                                       | 90.6302  | 103.3891 | 119.0901 | 107.1605 | 101.2277 | 98.10536 |
| 17388177 | Nr1h3         | nuclear receptor subfamily 1, group H, member 3                                       | 68.61442 | 72.21317 | 70.04062 | 73.76988 | 68.71056 | 64.60975 |
| 17244070 | Nr1h4         | nuclear receptor subfamily 1, group H, member 4                                       | 132.2707 | 156.0376 | 202.8838 | 141.3639 | 157.7624 | 162.2933 |
| 17408625 | Nr1h5         | nuclear receptor subfamily 1, group H, member 5                                       | 4.660291 | 4.8555   | 4.757026 | 5.192754 | 4.363331 | 5.100681 |
| 17330323 | Nr1i2         | nuclear receptor subfamily 1, group I, member 2                                       | 95.07539 | 126.3682 | 130.232  | 128.4827 | 128.9153 | 100.4699 |
| 17219231 | Nr1i3         | nuclear receptor subfamily 1, group I, member 3                                       | 136.647  | 246.9115 | 280.5161 | 209.9599 | 249.5854 | 277.1609 |
| 17236662 | Nr2c1         | nuclear receptor subfamily 2, group C, member 1                                       | 59.2741  | 46.30577 | 41.31632 | 47.54132 | 58.38072 | 52.11295 |
| 17461023 | Nr2c2         | nuclear receptor subfamily 2, group C, member 2                                       | 40.48681 | 51.43755 | 51.09428 | 42.86892 | 47.37224 | 51.09428 |
| 17240556 | Nr2e1         | nuclear receptor subfamily 2, group E, member 1                                       | 4.824602 | 5.009373 | 5.127871 | 5.031017 | 4.783047 | 4.951343 |
| 17527830 | Nr2e3         | nuclear receptor subfamily 2, group E, member 3                                       | 4.511696 | 4.239517 | 4.239517 | 4.239517 | 4.131283 | 4.165819 |
| 17294547 | Nr2f1         | nuclear receptor subfamily 2, group F, member 1                                       | 7.863382 | 6.88578  | 8.152542 | 9.431518 | 8.011709 | 11.45623 |
| 17492066 | Nr2f2         | nuclear receptor subfamily 2, group F, member 2                                       | 28.82503 | 38.13728 | 40.1999  | 28.44218 | 30.21326 | 33.67019 |
| 17510280 | Nr2f6         | nuclear receptor subfamily 2, group F, member 6                                       | 46.71552 | 58.73343 | 49.25779 | 49.62173 | 45.17585 | 43.60314 |
| 17353985 | Nr3c1         | nuclear receptor subfamily 3, group C, member 1                                       | 83.96115 | 92.18499 | 92.77988 | 89.3515  | 85.00584 | 100.1522 |

|          |               |                                                                                 |          |          |          |          |          |          |
|----------|---------------|---------------------------------------------------------------------------------|----------|----------|----------|----------|----------|----------|
| 17502626 | Nr3c2         | nuclear receptor subfamily 3, group C, member 2                                 | 18.76068 | 19.71074 | 20.21984 | 21.00484 | 21.00484 | 20.87291 |
| 17315178 | Nr4a1         | nuclear receptor subfamily 4, group A, member 1                                 | 21.08785 | 34.22978 | 17.43748 | 13.5862  | 10.9212  | 9.648335 |
| 17385374 | Nr4a2         | nuclear receptor subfamily 4, group A, member 2                                 | 17.43108 | 16.33427 | 12.56684 | 8.911078 | 13.08172 | 18.34061 |
| 17413945 | Nr4a3         | nuclear receptor subfamily 4, group A, member 3                                 | 5.953095 | 5.435188 | 6.225199 | 4.726231 | 5.088816 | 6.75619  |
| 17384705 | Nr5a1         | nuclear receptor subfamily 5, group A, member 1                                 | 6.44214  | 6.90418  | 6.588271 | 6.262332 | 6.44214  | 7.311006 |
| 17370475 | Nr5a1os       | nuclear receptor subfamily 5, group A, member 1, opposite strand [Source:MGI Sy | 4.154515 | 2.992352 | 3.550224 | 3.56334  | 2.832351 | 3.681133 |
| 17227515 | Nr5a2         | nuclear receptor subfamily 5, group A, member 2                                 | 126.684  | 150.2145 | 136.6565 | 124.8498 | 145.8923 | 174.5988 |
| 17384717 | Nr6a1         | nuclear receptor subfamily 6, group A, member 1                                 | 9.077594 | 7.685824 | 6.713244 | 7.698994 | 7.299461 | 7.640145 |
| 17287613 | Nsd1          | nuclear receptor-binding SET-domain protein 1                                   | 73.62736 | 76.43704 | 78.25006 | 76.43704 | 72.64139 | 84.10152 |
| 17456804 | Nrf1          | nuclear respiratory factor 1                                                    | 22.48265 | 24.78972 | 23.83385 | 22.92008 | 28.52055 | 22.4389  |
| 17357183 | Nxf1          | nuclear RNA export factor 1                                                     | 50.91292 | 52.64848 | 50.0036  | 50.49295 | 49.02413 | 50.0036  |
| 17544558 | Nxf2          | nuclear RNA export factor 2                                                     | 2.690846 | 2.704984 | 2.525064 | 2.627462 | 2.602702 | 2.611864 |
| 17544696 | Nxf3          | nuclear RNA export factor 3                                                     | 3.199752 | 2.920368 | 2.782805 | 2.953407 | 2.792254 | 2.937523 |
| 17544631 | Nxf7          | nuclear RNA export factor 7                                                     | 3.872728 | 3.245813 | 3.446017 | 3.381258 | 3.71224  | 3.317623 |
| 17266185 | Nsrp1         | nuclear speckle regulatory protein 1                                            | 49.63583 | 49.85236 | 46.94729 | 58.87119 | 44.09735 | 50.52411 |
| 17412813 | Nfx1          | nuclear transcription factor, X-box binding 1                                   | 45.86431 | 44.11049 | 38.68842 | 41.58064 | 31.93795 | 41.52188 |
| 17448645 | Nfxl1         | nuclear transcription factor, X-box binding-like 1                              | 43.96123 | 22.59983 | 23.40346 | 32.22704 | 28.06091 | 26.84776 |
| 17345782 | Nfya          | nuclear transcription factor-Y alpha                                            | 28.43626 | 22.69087 | 29.08191 | 24.55645 | 24.49593 | 26.25681 |
| 17243509 | Nfyb          | nuclear transcription factor-Y beta                                             | 30.91596 | 29.8819  | 33.07525 | 36.79072 | 26.32534 | 35.7408  |
| 17429495 | Nfyc          | nuclear transcription factor-Y gamma                                            | 29.49462 | 30.72817 | 31.02308 | 26.11126 | 22.73637 | 30.29127 |
| 17504958 | Nutf2         | nuclear transport factor 2                                                      | 24.82772 | 17.16526 | 17.16526 | 16.23595 | 15.80369 | 17.16526 |
| 17365714 | Nutf2-ps1     | nuclear transport factor 2, pseudogene 1                                        | 113.1325 | 123.1609 | 146.9977 | 121.7958 | 113.361  | 116.9583 |
| 17352656 | Nutf2-ps2     | nuclear transport factor 2, pseudogene 2                                        | 145.9055 | 204.9986 | 233.9603 | 173.4745 | 169.695  | 177.095  |
| 17538284 | Nxt2          | nuclear transport factor 2-like export factor 2                                 | 41.10352 | 37.42914 | 27.49448 | 32.0615  | 32.16322 | 32.67579 |
| 17233294 | Nus1          | nuclear undecaprenyl pyrophosphate synthase 1 homolog (S. cerevisiae)           | 97.15727 | 93.51591 | 98.17951 | 100.9369 | 91.63139 | 87.75017 |
| 17230499 | Nvl           | nuclear VCP-like                                                                | 34.95798 | 23.11136 | 29.94057 | 34.49272 | 26.54411 | 31.47294 |
| 17222825 | Nabp1         | nucleic acid binding protein 1                                                  | 52.84774 | 45.01706 | 32.46853 | 37.01223 | 40.81931 | 36.7479  |
| 17246131 | Nabp2         | nucleic acid binding protein 2                                                  | 55.89704 | 57.84579 | 58.40419 | 48.93077 | 45.36098 | 41.96574 |
| 17490859 | Nucb1         | nucleobindin 1                                                                  | 112.1604 | 99.34049 | 114.2009 | 80.29343 | 94.37678 | 91.28399 |
| 17482095 | Nucb2         | nucleobindin 2                                                                  | 53.41637 | 27.23009 | 29.12407 | 37.43251 | 29.16103 | 22.49621 |
| 17359902 | Nolc1         | nucleolar and coiled-body phosphoprotein 1                                      | 44.71106 | 47.70141 | 39.36878 | 46.3382  | 48.02088 | 41.76869 |
| 17533743 | Gm5124        | nucleolar and coiled-body phosphoprotein 1 pseudogene                           | 9.701582 | 9.477654 | 11.24366 | 13.0175  | 11.62509 | 11.24366 |
| 17374833 | Nusap1        | nucleolar and spindle associated protein 1                                      | 7.863001 | 6.70901  | 12.14037 | 12.80788 | 7.796951 | 8.302582 |
| 17422914 | Noc2l         | nucleolar complex associated 2 homolog (S. cerevisiae)                          | 47.17661 | 50.27537 | 51.60146 | 46.22784 | 50.27537 | 56.38228 |
| 17364367 | Noc3l         | nucleolar complex associated 3 homolog (S. cerevisiae)                          | 32.63323 | 30.18961 | 27.70895 | 28.52727 | 29.14063 | 27.64717 |
| 17451043 | Noc4l         | nucleolar complex associated 4 homolog (S. cerevisiae)                          | 11.03649 | 11.7531  | 10.39783 | 11.16453 | 9.828628 | 11.1252  |
| 17274267 | Nol10         | nucleolar protein 10                                                            | 15.15204 | 14.31296 | 13.2773  | 16.37962 | 14.31296 | 13.52859 |
| 17271091 | Nol11         | nucleolar protein 11                                                            | 34.78661 | 27.2067  | 23.23343 | 27.2067  | 27.2067  | 28.94776 |
| 17547640 | Nol11         | nucleolar protein 11                                                            | 7.942317 | 9.169036 | 7.097741 | 9.077531 | 7.894621 | 10.84584 |
| 17312835 | Nol12         | nucleolar protein 12                                                            | 24.71903 | 19.74123 | 23.8279  | 22.04195 | 24.1463  | 21.84952 |
| 17504707 | Nol3          | nucleolar protein 3 (apoptosis repressor with CARD domain)                      | 17.13364 | 16.93012 | 17.25413 | 14.41032 | 15.04519 | 15.09041 |
| 17353079 | Nol4          | nucleolar protein 4                                                             | 3.060209 | 3.254148 | 3.214312 | 3.294798 | 3.185324 | 3.639348 |
| 17393051 | Nol4l         | nucleolar protein 4-like                                                        | 4.681043 | 4.894054 | 4.651481 | 5.058641 | 4.767622 | 5.75769  |
| 17286882 | Nol7          | nucleolar protein 7                                                             | 25.49443 | 24.57603 | 25.71093 | 23.90764 | 34.57147 | 23.39405 |
| 17287185 | Nol8          | nucleolar protein 8                                                             | 56.0946  | 42.98049 | 42.30599 | 49.11085 | 46.05769 | 40.61611 |
| 17422047 | Nol9          | nucleolar protein 9                                                             | 41.26395 | 40.30704 | 31.43479 | 32.38783 | 30.39812 | 34.36457 |
| 17424128 | Nol6          | nucleolar protein family 6 (RNA-associated)                                     | 62.7468  | 58.02771 | 58.97166 | 62.1598  | 49.94402 | 51.06384 |
| 17216563 | Nifk          | nucleolar protein interacting with the FHA domain of MKI67                      | 68.64106 | 61.81864 | 52.87779 | 60.51454 | 66.25374 | 63.93039 |
| 17435660 | Nom1          | nucleolar protein with MIF4G domain 1                                           | 23.27695 | 25.66321 | 25.36118 | 20.29525 | 21.66584 | 33.1611  |
| 17225153 | Ncl           | nucleolin                                                                       | 130.2383 | 139.7205 | 123.4275 | 120.3798 | 141.8832 | 123.8431 |
| 17325849 | Nepro         | nucleolus and neural progenitor protein                                         | 16.73515 | 21.22364 | 23.37898 | 17.59569 | 19.06824 | 19.72523 |
| 17261550 | Npm1          | nucleophosmin 1                                                                 | 7.948486 | 10.31885 | 8.268067 | 8.982768 | 10.62124 | 9.365526 |
| 17308442 | Npm2          | nucleophosmin/nucleoplasmin 2                                                   | 15.05468 | 13.59439 | 15.12172 | 13.63082 | 14.31187 | 14.31504 |
| 17548852 | LOC105243690  | nucleophosmin-like                                                              | 116.9485 | 116.5843 | 115.4104 | 119.4299 | 150.783  | 127.6297 |
| 17365243 | Npm3          | nucleoplasmin 3                                                                 | 83.12151 | 97.38516 | 82.7708  | 94.04178 | 106.8972 | 84.38063 |
| 17460254 | Npm3-ps1      | nucleoplasmin 3, pseudogene 1                                                   | 2.344516 | 2.094869 | 2.09811  | 2.245318 | 2.005205 | 2.072138 |
| 17245272 | Nup107        | nucleoporin 107                                                                 | 17.09864 | 13.29047 | 12.65872 | 15.52735 | 13.92495 | 14.19479 |
| 17514004 | Nup133        | nucleoporin 133                                                                 | 24.73205 | 24.40103 | 22.30786 | 25.0148  | 21.34121 | 29.90677 |
| 17292190 | Nup153        | nucleoporin 153                                                                 | 63.03407 | 62.99869 | 61.44868 | 63.03407 | 68.26906 | 64.41211 |
| 17310078 | Nup155        | nucleoporin 155                                                                 | 80.07778 | 58.56107 | 54.25221 | 58.60086 | 62.12276 | 54.75391 |
| 17372984 | Nup160        | nucleoporin 160                                                                 | 19.71156 | 19.34126 | 18.60515 | 19.36084 | 20.30904 | 21.27888 |
| 17369147 | Nup188        | nucleoporin 188                                                                 | 29.14568 | 29.14366 | 29.14568 | 29.14568 | 29.14568 | 25.81325 |
| 17457249 | Nup205        | nucleoporin 205                                                                 | 23.70879 | 28.38978 | 22.96126 | 23.22393 | 24.66118 | 22.98021 |
| 17468961 | Nup210        | nucleoporin 210                                                                 | 31.44655 | 27.77182 | 30.86479 | 26.32333 | 26.93649 | 25.42613 |
| 17399604 | Nup210l       | nucleoporin 210-like                                                            | 3.564624 | 3.564624 | 3.564624 | 3.785149 | 3.501905 | 3.775218 |
| 17369627 | Nup214        | nucleoporin 214                                                                 | 29.50873 | 29.50035 | 33.29284 | 33.43761 | 27.51812 | 32.45188 |
| 17372444 | Nup35         | nucleoporin 35                                                                  | 3.568753 | 2.955864 | 4.189767 | 4.511915 | 3.202747 | 3.548674 |
| 17495368 | Nup35         | nucleoporin 35                                                                  | 7.308878 | 9.341667 | 10.2333  | 10.59704 | 7.814535 | 6.850503 |
| 17236313 | Nup37         | nucleoporin 37                                                                  | 14.79769 | 13.07157 | 14.51517 | 14.96977 | 14.44512 | 15.05677 |
| 17231534 | Nup43         | nucleoporin 43                                                                  | 10.15691 | 7.038851 | 9.810455 | 11.07113 | 9.402862 | 9.112077 |
| 17313767 | Nup50         | nucleoporin 50                                                                  | 60.93883 | 54.14965 | 50.97543 | 57.80691 | 66.80434 | 60.34867 |
| 17469274 | 1700123L14Rik | nucleoporin 50 pseudogene                                                       | 7.370538 | 6.360102 | 6.241921 | 5.96309  | 5.706436 | 5.862029 |
| 17449731 | Nup54         | nucleoporin 54                                                                  | 49.51281 | 43.02997 | 41.76001 | 42.11377 | 46.64143 | 40.81535 |
| 17544919 | Nup62cl       | nucleoporin 62 C-terminal like                                                  | 3.493686 | 4.801649 | 4.348959 | 4.61567  | 4.309767 | 4.569607 |
| 17258239 | Nup85         | nucleoporin 85                                                                  | 20.22727 | 23.98682 | 23.61154 | 21.11227 | 19.17773 | 23.51403 |
| 17265393 | Nup88         | nucleoporin 88                                                                  | 25.36118 | 24.16153 | 25.36118 | 25.36118 | 20.76181 | 25.06166 |
| 17503948 | Nup93         | nucleoporin 93                                                                  | 18.3807  | 14.13353 | 11.49457 | 13.96322 | 14.48251 | 9.424199 |
| 17494041 | Nup98         | nucleoporin 98                                                                  | 95.50273 | 86.77274 | 83.49686 | 77.00125 | 76.40155 | 72.28728 |
| 17307403 | Nupl1         | nucleoporin like 1                                                              | 66.37969 | 70.15432 | 61.9718  | 64.35052 | 62.90662 | 52.20442 |
| 17435267 | Nupl2         | nucleoporin like 2                                                              | 14.31683 | 15.77426 | 13.33467 | 14.11424 | 12.9588  | 14.44812 |
| 17266095 | Nxn           | nucleoredoxin                                                                   | 8.898363 | 8.216705 | 6.599103 | 8.136679 | 8.935819 | 8.819764 |
| 17510358 | Nxn1l         | nucleoredoxin-like 1                                                            | 5.854557 | 5.975875 | 4.047273 | 5.309404 | 5.002641 | 4.805178 |
| 17287320 | Nxn12         | nucleoredoxin-like 2                                                            | 6.552748 | 6.506853 | 5.629981 | 5.716056 | 5.412969 | 5.829491 |
| 17506891 | Ntpcr         | nucleoside-triphosphatase, cancer-related                                       | 15.60461 | 11.52241 | 15.45659 | 13.14361 | 13.45322 | 12.85796 |

|          |          |                                                                               |          |          |          |          |          |          |
|----------|----------|-------------------------------------------------------------------------------|----------|----------|----------|----------|----------|----------|
| 17237252 | Nap1l1   | nucleosome assembly protein 1-like 1                                          | 50.5122  | 54.87853 | 54.87967 | 46.58069 | 52.65396 | 41.07304 |
| 17543781 | Nap1l2   | nucleosome assembly protein 1-like 2                                          | 2.704553 | 2.628355 | 2.553418 | 2.621368 | 2.732478 | 2.686746 |
| 17544284 | Nap1l3   | nucleosome assembly protein 1-like 3                                          | 4.643717 | 4.33136  | 4.06017  | 4.301441 | 4.191626 | 5.242155 |
| 17498255 | Nap1l4   | nucleosome assembly protein 1-like 4                                          | 68.28042 | 56.56548 | 64.9431  | 66.23813 | 64.95326 | 62.30172 |
| 17467205 | Nap1l5   | nucleosome assembly protein 1-like 5                                          | 4.681043 | 4.681043 | 5.509304 | 5.494964 | 4.381607 | 4.681043 |
| 17322829 | Nubp1    | nucleotide binding protein 1                                                  | 40.06248 | 40.03223 | 40.42792 | 42.85376 | 40.88756 | 37.56117 |
| 17342042 | Nubp2    | nucleotide binding protein 2                                                  | 69.40896 | 62.25639 | 52.0967  | 51.08118 | 56.74888 | 51.29869 |
| 17275408 | Nubpl    | nucleotide binding protein-like                                               | 31.27006 | 18.80768 | 16.33755 | 25.85354 | 21.31711 | 21.62488 |
| 17467015 | Nod1     | nucleotide-binding oligomerization domain containing 1                        | 32.70932 | 27.48724 | 31.66199 | 36.33832 | 33.03263 | 34.1492  |
| 17503664 | Nod2     | nucleotide-binding oligomerization domain containing 2                        | 18.01042 | 16.09533 | 15.95614 | 19.28838 | 18.34316 | 16.40303 |
| 17511134 | Nacc1    | nucleus accumbens associated 1, BEN and BTB (POZ) domain containing           | 61.49128 | 57.10915 | 65.99569 | 53.99336 | 45.7275  | 51.87509 |
| 17382822 | Nacc2    | nucleus accumbens associated 2, BEN and BTB (POZ) domain containing           | 27.31043 | 27.27864 | 30.88833 | 29.22781 | 29.42213 | 28.98832 |
| 17316831 | Nudcd1   | NudC domain containing 1                                                      | 45.32955 | 34.66337 | 30.62526 | 33.69494 | 37.29447 | 35.36082 |
| 17248512 | Nudcd2   | NudC domain containing 2                                                      | 29.23551 | 29.36102 | 30.55253 | 33.57115 | 28.43804 | 33.2147  |
| 17260295 | Nudcd3   | NudC domain containing 3                                                      | 32.62826 | 35.58433 | 32.18218 | 28.29451 | 30.81904 | 32.51763 |
| 17444068 | Nudt1    | nudix (nucleoside diphosphate linked moiety X)-type motif 1                   | 16.78953 | 16.25859 | 17.23584 | 19.42873 | 13.19482 | 16.52261 |
| 17539768 | Nudt10   | nudix (nucleoside diphosphate linked moiety X)-type motif 10                  | 3.021594 | 3.034082 | 2.653341 | 3.451396 | 2.615705 | 3.09513  |
| 17532732 | Nudt11   | nudix (nucleoside diphosphate linked moiety X)-type motif 11                  | 5.303372 | 4.936813 | 4.971358 | 5.09637  | 7.443494 | 4.20927  |
| 17346618 | Nudt12   | nudix (nucleoside diphosphate linked moiety X)-type motif 12                  | 132.7621 | 138.2178 | 128.063  | 133.7041 | 116.2003 | 130.4298 |
| 17339066 | Nudt12os | nudix (nucleoside diphosphate linked moiety X)-type motif 12, opposite strand | 4.367356 | 4.20927  | 3.793712 | 4.113681 | 4.085266 | 4.58474  |
| 17297413 | Nudt13   | nudix (nucleoside diphosphate linked moiety X)-type motif 13                  | 33.37856 | 32.68734 | 31.28372 | 35.9002  | 29.16103 | 36.6063  |
| 17284280 | Nudt14   | nudix (nucleoside diphosphate linked moiety X)-type motif 14                  | 13.36928 | 14.31395 | 16.21481 | 16.80047 | 16.3828  | 15.10998 |
| 17308612 | Nudt15   | nudix (nucleoside diphosphate linked moiety X)-type motif 15                  | 4.01461  | 3.472826 | 4.3749   | 3.703322 | 3.44542  | 3.656796 |
| 17530424 | Nudt16   | nudix (nucleoside diphosphate linked moiety X)-type motif 16                  | 25.47146 | 27.15865 | 25.84745 | 25.47146 | 22.89118 | 20.45881 |
| 17322621 | Nudt16l1 | nudix (nucleoside diphosphate linked moiety X)-type motif 16-like 1           | 33.39847 | 28.93573 | 28.89484 | 26.55884 | 31.3219  | 27.70607 |
| 17408090 | Nudt17   | nudix (nucleoside diphosphate linked moiety X)-type motif 17                  | 8.292057 | 6.945218 | 6.992896 | 7.322976 | 6.992896 | 7.025496 |
| 17301796 | Nudt18   | nudix (nucleoside diphosphate linked moiety X)-type motif 18                  | 31.3471  | 23.44519 | 28.19779 | 29.54496 | 36.32447 | 19.87331 |
| 17489801 | Nudt19   | nudix (nucleoside diphosphate linked moiety X)-type motif 19                  | 50.61489 | 39.63299 | 43.26325 | 45.08045 | 43.78425 | 56.88633 |
| 17412871 | Nudt2    | nudix (nucleoside diphosphate linked moiety X)-type motif 2                   | 25.31762 | 20.22966 | 19.91578 | 26.36076 | 21.67845 | 24.90287 |
| 17511825 | Nudt21   | nudix (nucleoside diphosphate linked moiety X)-type motif 21                  | 41.04146 | 45.53456 | 40.29754 | 40.85753 | 57.29431 | 45.33961 |
| 17362216 | Nudt22   | nudix (nucleoside diphosphate linked moiety X)-type motif 22                  | 18.70199 | 13.35604 | 23.4046  | 18.03978 | 21.58848 | 21.30736 |
| 17244514 | Nudt4    | nudix (nucleoside diphosphate linked moiety X)-type motif 4                   | 496.865  | 551.7152 | 530.3901 | 498.5761 | 576.014  | 601.1495 |
| 17366542 | Nudt5    | nudix (nucleoside diphosphate linked moiety X)-type motif 5                   | 16.19437 | 19.34099 | 18.47138 | 14.47067 | 12.19806 | 17.75902 |
| 17404911 | Nudt6    | nudix (nucleoside diphosphate linked moiety X)-type motif 6                   | 13.16705 | 10.54685 | 12.29151 | 12.06763 | 15.02913 | 11.75359 |
| 17505851 | Nudt7    | nudix (nucleoside diphosphate linked moiety X)-type motif 7                   | 238.177  | 106.3739 | 97.36558 | 198.2092 | 113.3319 | 107.6444 |
| 17356061 | Nudt8    | nudix (nucleoside diphosphate linked moiety X)-type motif 8                   | 19.32478 | 18.11572 | 16.67726 | 24.48659 | 17.77601 | 18.20951 |
| 17439769 | Nudt9    | nudix (nucleoside diphosphate linked moiety X)-type motif 9                   | 34.60863 | 41.55442 | 39.54628 | 40.41783 | 31.0952  | 39.78217 |
| 17342750 | Nudt3    | nudix (nucleotide diphosphate linked moiety X)-type motif 3                   | 40.53988 | 43.12941 | 46.49456 | 45.86749 | 41.79041 | 46.49456 |
| 17229433 | Nuf2     | NUF2, NDC80 kinetochore complex component, homolog (S. cerevisiae)            | 4.603273 | 4.603273 | 4.69762  | 5.270902 | 4.166425 | 4.603273 |
| 17282435 | Numb     | numb gene homolog (Drosophila)                                                | 51.71819 | 61.80664 | 59.25315 | 46.7531  | 37.2379  | 47.74938 |
| 17475564 | Numbl    | numb-like                                                                     | 5.211144 | 9.341084 | 7.118583 | 7.013429 | 6.545303 | 10.29855 |
| 17337269 | Nrm      | nurim (nuclear envelope membrane protein)                                     | 11.43251 | 14.05323 | 9.899187 | 11.51203 | 8.748344 | 13.68003 |
| 17287272 | Nutm2    | NUT family member 2                                                           | 3.202836 | 2.908711 | 3.08609  | 2.656506 | 3.136227 | 4.249137 |
| 17389315 | Nutm1    | NUT midline carcinoma, family member 1                                        | 7.218905 | 9.190988 | 8.571217 | 8.631253 | 6.546846 | 6.943196 |
| 17533440 | Nyx      | nyctalopin                                                                    | 5.384976 | 5.617429 | 5.617429 | 5.264549 | 6.123812 | 5.617429 |
| 17300686 | Nynrin   | NYN domain and retroviral integrase containing                                | 6.288866 | 6.851691 | 10.3177  | 6.241704 | 7.024863 | 7.227416 |
| 17484271 | Mgmt     | O-6-methylguanine-DNA methyltransferase                                       | 70.19372 | 68.42777 | 67.56106 | 78.70372 | 59.04119 | 68.29131 |
| 17338434 | Oard1    | O-acyl-ADP-ribose deacylase 1                                                 | 28.89504 | 31.13122 | 32.61695 | 37.63805 | 33.27346 | 33.33024 |
| 17351364 | Oacyl    | O-acyltransferase like                                                        | 2.949274 | 2.995735 | 3.254396 | 2.820889 | 4.381485 | 3.286268 |
| 17526102 | Oaf      | OAF homolog (Drosophila)                                                      | 293.5454 | 304.6798 | 310.4356 | 333.962  | 329.4647 | 376.6263 |
| 17386481 | Ola1     | Obg-like ATPase 1                                                             | 47.0323  | 40.38927 | 36.85427 | 37.42421 | 39.62365 | 38.26226 |
| 17263223 | Obscn    | obscurin, cytoskeletal calmodulin and titin-interacting RhoGEF                | 5.510411 | 5.510411 | 5.55301  | 5.510411 | 5.131107 | 5.125526 |
| 17224629 | Obsl1    | obscurin-like 1                                                               | 6.239282 | 9.488237 | 9.488237 | 10.771   | 9.488237 | 9.488237 |
| 17295670 | Ocln     | occludin                                                                      | 48.52277 | 46.28234 | 46.28234 | 52.24786 | 64.27162 | 55.16877 |
| 17502157 | Ocel1    | occludin/ELL domain containing 1                                              | 23.24035 | 17.65971 | 16.46385 | 20.61453 | 20.91042 | 16.97936 |
| 17438101 | Ociad1   | OClA domain containing 1                                                      | 204.2681 | 221.8453 | 215.3411 | 204.1676 | 192.6395 | 206.7782 |
| 17448821 | Ociad2   | OClA domain containing 2                                                      | 71.7611  | 58.21544 | 39.19207 | 58.21544 | 62.61429 | 54.75049 |
| 17534497 | Oclr     | oculocerebrorenal syndrome of Lowe                                            | 12.76366 | 10.7911  | 13.32192 | 13.1005  | 11.19847 | 9.952093 |
| 17478698 | Oca2     | oculocutaneous albinism II                                                    | 4.97446  | 3.8745   | 5.269149 | 3.87767  | 5.232245 | 5.652269 |
| 17274021 | Osr1     | odd-skipped related 1 (Drosophila)                                            | 10.22607 | 11.83666 | 9.941613 | 9.941613 | 9.310251 | 12.08965 |
| 17310982 | Osr2     | odd-skipped related 2                                                         | 4.80338  | 5.060921 | 5.123856 | 4.600147 | 5.266703 | 5.549393 |
| 17438684 | Odam     | odontogenic, ameloblast associated                                            | 2.490594 | 2.458741 | 2.611358 | 2.69856  | 2.724308 | 2.633388 |
| 17368163 | Obp2a    | odorant binding protein 2A                                                    | 28.24395 | 7.665979 | 4.013804 | 16.23595 | 11.56746 | 8.928142 |
| 17368175 | Obp2b    | odorant binding protein 2B                                                    | 5.163288 | 4.651545 | 5.292649 | 5.287259 | 5.537059 | 6.261985 |
| 17542933 | Obp1a    | odorant binding protein 1A                                                    | 3.530885 | 2.67402  | 2.793396 | 2.346873 | 2.103629 | 2.953407 |
| 17536052 | Obp1b    | odorant binding protein 1B                                                    | 3.776134 | 2.543544 | 2.53225  | 2.966394 | 2.758435 | 2.562532 |
| 17381204 | Olah     | oleoyl-ACP hydrolase                                                          | 2.953407 | 2.586803 | 2.953407 | 2.953407 | 4.270278 | 3.258211 |
| 17368646 | Olfm1    | olfactomedin 1                                                                | 13.60146 | 14.04622 | 13.80999 | 14.63986 | 12.17331 | 13.54971 |
| 17524441 | Olfm2    | olfactomedin 2                                                                | 4.653286 | 5.997245 | 4.653286 | 4.213327 | 3.729313 | 5.353009 |
| 17401970 | Olfm3    | olfactomedin 3                                                                | 8.844496 | 7.075146 | 7.279756 | 6.692012 | 9.363254 | 6.603816 |
| 17302279 | Olfm4    | olfactomedin 4                                                                | 3.254148 | 3.779433 | 3.281215 | 3.513576 | 5.067872 | 3.414466 |
| 17494307 | Olfm5    | olfactomedin 5                                                                | 4.763824 | 4.763824 | 6.298988 | 4.763824 | 4.763824 | 4.296048 |
| 17481550 | Olfm1l   | olfactomedin-like 1                                                           | 17.8818  | 21.82788 | 21.21011 | 21.21011 | 19.22564 | 19.06652 |
| 17370487 | Olfm12a  | olfactomedin-like 2A                                                          | 6.882535 | 6.834473 | 7.772615 | 6.518229 | 7.726634 | 7.73183  |
| 17219185 | Olfm12b  | olfactomedin-like 2B                                                          | 16.64261 | 17.48614 | 19.56469 | 18.17344 | 14.04213 | 17.5952  |
| 17408648 | Olfm13   | olfactomedin-like 3                                                           | 14.24921 | 14.52997 | 14.31296 | 15.94542 | 13.3615  | 17.02379 |
| 17493547 | Omp      | olfactory marker protein                                                      | 7.404642 | 8.855293 | 8.372451 | 10.17806 | 11.26707 | 10.35532 |
| 17265761 | Olfr1    | olfactory receptor 1                                                          | 2.65119  | 2.331196 | 2.12908  | 2.31474  | 2.458673 | 2.072138 |
| 17248961 | Olfr10   | olfactory receptor 10                                                         | 2.721647 | 2.17359  | 2.531145 | 2.98078  | 4.163163 | 3.198599 |
| 17387610 | Olfr1000 | olfactory receptor 1000                                                       | 4.881045 | 5.914844 | 4.358495 | 4.230183 | 4.142064 | 4.351703 |
| 17387612 | Olfr1002 | olfactory receptor 1002                                                       | 2.418043 | 2.07346  | 2.099084 | 2.224082 | 2.305069 | 2.497301 |
| 17387617 | Olfr1006 | olfactory receptor 1006                                                       | 3.045354 | 2.040171 | 2.534463 | 2.61614  | 2.242488 | 3.259137 |
| 17372751 | Olfr1008 | olfactory receptor 1008                                                       | 2.953407 | 2.592744 | 2.821535 | 2.879304 | 6.184084 | 2.953407 |
| 17372753 | Olfr1009 | olfactory receptor 1009                                                       | 4.231502 | 3.939029 | 4.140629 | 4.822195 | 4.352065 | 4.37105  |

|          |              |                                       |          |          |          |          |          |          |
|----------|--------------|---------------------------------------|----------|----------|----------|----------|----------|----------|
| 17344862 | Olfr101      | olfactory receptor 101                | 2.49931  | 2.314772 | 2.455676 | 2.251427 | 2.314772 | 2.19328  |
| 17372755 | Olfr1010     | olfactory receptor 1010               | 3.285584 | 3.339703 | 3.009972 | 4.120045 | 3.811503 | 3.321719 |
| 17387620 | Olfr1012     | olfactory receptor 1012               | 2.186722 | 2.65119  | 2.62799  | 2.09423  | 2.38644  | 2.809941 |
| 17372757 | Olfr1013     | olfactory receptor 1013               | 2.480894 | 2.631381 | 2.743219 | 2.5355   | 2.606963 | 2.831762 |
| 17372759 | Olfr1014     | olfactory receptor 1014               | 3.310846 | 3.049896 | 2.785642 | 2.450897 | 3.255457 | 3.167644 |
| 17372761 | Olfr1015     | olfactory receptor 1015               | 4.680491 | 4.908595 | 4.15973  | 3.696526 | 5.120306 | 3.81182  |
| 17387622 | Olfr1016     | olfactory receptor 1016               | 2.951033 | 2.926406 | 3.065962 | 3.019229 | 3.415957 | 3.204568 |
| 17372765 | Olfr1018     | olfactory receptor 1018               | 3.427722 | 2.420844 | 2.403739 | 2.932559 | 2.926102 | 2.485765 |
| 17387624 | Olfr1019     | olfactory receptor 1019               | 2.728598 | 3.296808 | 2.220016 | 2.333507 | 2.107379 | 2.099288 |
| 17344866 | Olfr102      | olfactory receptor 102                | 2.67402  | 2.315767 | 2.271728 | 2.466388 | 1.990747 | 2.301317 |
| 17372767 | Olfr1020     | olfactory receptor 1020               | 2.162035 | 2.047481 | 2.181711 | 2.812202 | 2.162035 | 2.162035 |
| 17372771 | Olfr1022     | olfactory receptor 1022               | 3.95646  | 3.104692 | 3.951937 | 3.156553 | 2.957135 | 3.918931 |
| 17372773 | Olfr1023     | olfactory receptor 1023               | 2.544902 | 2.810818 | 2.481049 | 2.327514 | 2.257193 | 2.481049 |
| 17387628 | Olfr1024     | olfactory receptor 1024               | 4.096836 | 4.517047 | 3.873372 | 4.701822 | 4.325479 | 3.44824  |
| 17372775 | Olfr1025-ps1 | olfactory receptor 1025, pseudogene 1 | 2.372552 | 2.503714 | 3.218927 | 3.427247 | 3.086582 | 4.622073 |
| 17372777 | Olfr1026     | olfactory receptor 1026               | 2.625478 | 2.420844 | 2.67402  | 2.578103 | 2.384462 | 2.565304 |
| 17372779 | Olfr1028     | olfactory receptor 1028               | 2.311597 | 2.465072 | 2.155227 | 2.25366  | 3.540222 | 2.705303 |
| 17372781 | Olfr1029     | olfactory receptor 1029               | 2.798338 | 2.196581 | 1.924402 | 2.752247 | 2.410179 | 2.100816 |
| 17344870 | Olfr103      | olfactory receptor 103                | 2.700825 | 2.812182 | 2.185495 | 2.360201 | 2.584025 | 2.430107 |
| 17372785 | Olfr1030     | olfactory receptor 1030               | 1.980425 | 2.25238  | 2.313713 | 2.19544  | 2.255035 | 1.908157 |
| 17372788 | Olfr1031     | olfactory receptor 1031               | 3.402983 | 2.551013 | 2.140296 | 2.719271 | 2.188921 | 2.719271 |
| 17372790 | Olfr1032     | olfactory receptor 1032               | 2.391606 | 1.959615 | 1.886144 | 2.099317 | 2.081596 | 2.170263 |
| 17372792 | Olfr1033     | olfactory receptor 1033               | 6.608624 | 5.89814  | 4.464783 | 6.024243 | 5.583927 | 6.070562 |
| 17372797 | Olfr1034     | olfactory receptor 1034               | 41.68221 | 33.01661 | 36.41296 | 36.73797 | 49.24789 | 39.55615 |
| 17372801 | Olfr1036     | olfactory receptor 1036               | 2.134991 | 2.171964 | 2.365557 | 2.234528 | 2.384324 | 1.865419 |
| 17387630 | Olfr1037     | olfactory receptor 1037               | 2.342729 | 2.404822 | 2.204406 | 2.024422 | 2.70624  | 1.960104 |
| 17372805 | Olfr1038-ps  | olfactory receptor 1038, pseudogene   | 2.953407 | 3.102906 | 3.281397 | 2.953407 | 2.953407 | 3.191025 |
| 17387634 | Olfr1039     | olfactory receptor 1039               | 4.622041 | 7.727544 | 4.158347 | 4.844138 | 5.358466 | 5.243536 |
| 17387636 | Olfr1040     | olfactory receptor 1040               | 3.375427 | 2.606909 | 2.702847 | 2.297556 | 2.712927 | 2.425849 |
| 17387638 | Olfr1042     | olfactory receptor 1042               | 1.914331 | 2.62799  | 1.95937  | 2.336226 | 2.177043 | 2.07612  |
| 17387642 | Olfr1043     | olfactory receptor 1043               | 2.572605 | 2.474214 | 3.036985 | 2.953407 | 2.276267 | 2.841396 |
| 17387644 | Olfr1044     | olfactory receptor 1044               | 2.270642 | 3.306328 | 2.481049 | 2.606909 | 3.220847 | 2.516049 |
| 17387648 | Olfr1045     | olfactory receptor 1045               | 2.82635  | 2.885037 | 2.67402  | 2.18883  | 2.771563 | 2.361429 |
| 17387650 | Olfr1046     | olfactory receptor 1046               | 3.311764 | 5.780603 | 4.501731 | 3.737024 | 3.332581 | 3.559217 |
| 17387652 | Olfr1047     | olfactory receptor 1047               | 6.459892 | 5.495954 | 4.086569 | 5.32278  | 4.447239 | 5.288249 |
| 17387654 | Olfr1048     | olfactory receptor 1048               | 2.432568 | 1.793279 | 1.898237 | 2.656248 | 2.239691 | 2.335093 |
| 17387656 | Olfr1049     | olfactory receptor 1049               | 2.244431 | 2.27813  | 2.36061  | 2.383993 | 3.554755 | 2.394327 |
| 17387658 | Olfr1051     | olfactory receptor 1051               | 2.633735 | 2.596845 | 2.209179 | 2.56767  | 2.56767  | 2.908933 |
| 17372808 | Olfr1052     | olfactory receptor 1052               | 3.484665 | 3.212508 | 3.071365 | 2.394609 | 2.718574 | 3.056456 |
| 17387660 | Olfr1053     | olfactory receptor 1053               | 2.564949 | 2.434035 | 2.432264 | 1.828081 | 2.090054 | 2.020959 |
| 17387662 | Olfr1054     | olfactory receptor 1054               | 2.250133 | 2.35873  | 1.974066 | 2.563633 | 3.232908 | 2.447519 |
| 17387664 | Olfr1055     | olfactory receptor 1055               | 2.366902 | 2.239971 | 2.382275 | 2.511884 | 4.609787 | 2.418278 |
| 17387666 | Olfr1056     | olfactory receptor 1056               | 2.461009 | 2.791035 | 2.622877 | 2.409009 | 2.376074 | 3.559661 |
| 17387670 | Olfr1057     | olfactory receptor 1057               | 5.200535 | 5.614665 | 3.703322 | 3.833999 | 3.612456 | 4.623803 |
| 17387672 | Olfr1058     | olfactory receptor 1058               | 2.129493 | 2.166806 | 1.886563 | 1.839355 | 2.218062 | 2.503124 |
| 17387674 | Olfr1061     | olfactory receptor 1061               | 2.60765  | 2.787149 | 2.64286  | 3.119598 | 2.735795 | 2.903554 |
| 17387676 | Olfr1062     | olfactory receptor 1062               | 3.0739   | 2.929247 | 2.768472 | 2.899351 | 2.797639 | 2.611919 |
| 17387678 | Olfr1065     | olfactory receptor 1065               | 2.857077 | 4.531096 | 2.531531 | 2.937543 | 2.461999 | 2.598412 |
| 17387681 | Olfr1066     | olfactory receptor 1066               | 1.603595 | 2.615887 | 3.009972 | 2.645481 | 3.829962 | 3.334961 |
| 17337566 | Olfr107      | olfactory receptor 107                | 2.414509 | 2.256505 | 2.298767 | 1.895423 | 2.295662 | 2.22214  |
| 17372810 | Olfr1076     | olfactory receptor 1076               | 3.758664 | 4.78318  | 3.739097 | 3.663138 | 4.44462  | 3.626681 |
| 17387685 | Olfr1077-ps1 | olfactory receptor 1077, pseudogene 1 | 27.78819 | 44.82774 | 38.19124 | 33.54254 | 25.13577 | 33.93824 |
| 17387688 | Olfr1079     | olfactory receptor 1079               | 2.741547 | 2.239691 | 2.203245 | 2.101108 | 2.490974 | 2.666117 |
| 17337570 | Olfr108      | olfactory receptor 108                | 2.680496 | 2.6144   | 2.939886 | 4.724364 | 3.338245 | 4.442648 |
| 17387692 | Olfr1080     | olfactory receptor 1080               | 2.416703 | 3.141209 | 2.937075 | 2.097455 | 2.682206 | 3.523282 |
| 17387694 | Olfr1082     | olfactory receptor 1082               | 2.379799 | 2.106576 | 2.241633 | 2.365229 | 2.619824 | 2.261876 |
| 17387697 | Olfr1084     | olfactory receptor 1084               | 2.343541 | 1.886733 | 2.164374 | 2.191001 | 1.938096 | 1.865006 |
| 17387700 | Olfr1085     | olfactory receptor 1085               | 4.209299 | 3.414584 | 3.796447 | 3.815918 | 4.245516 | 3.124987 |
| 17387702 | Olfr1086     | olfactory receptor 1086               | 2.406006 | 2.291703 | 1.965015 | 2.406006 | 2.471111 | 1.9358   |
| 17387704 | Olfr1087     | olfactory receptor 1087               | 2.11515  | 2.690641 | 2.10944  | 2.073172 | 1.956371 | 2.69929  |
| 17387706 | Olfr1089     | olfactory receptor 1089               | 2.406006 | 2.150601 | 1.957483 | 2.148634 | 1.552561 | 2.830938 |
| 17337574 | Olfr109      | olfactory receptor 109                | 2.950583 | 2.443502 | 2.13505  | 2.963598 | 2.782767 | 2.212151 |
| 17387708 | Olfr1090     | olfactory receptor 1090               | 2.162035 | 2.690641 | 1.831137 | 2.502829 | 2.458673 | 2.410346 |
| 17372812 | Olfr1093     | olfactory receptor 1093               | 3.253427 | 2.453328 | 2.481049 | 2.586839 | 2.633297 | 2.832371 |
| 17372815 | Olfr1094     | olfactory receptor 1094               | 2.682968 | 2.855394 | 2.00846  | 2.440573 | 4.205304 | 1.972616 |
| 17387712 | Olfr1095     | olfactory receptor 1095               | 2.28216  | 2.332117 | 2.583416 | 3.067918 | 2.710934 | 2.072138 |
| 17387714 | Olfr1096-ps1 | olfactory receptor 1096, pseudogene 1 | 2.441842 | 2.045226 | 1.955856 | 1.898013 | 2.089909 | 2.372125 |
| 17387717 | Olfr1097     | olfactory receptor 1097               | 2.596683 | 2.117556 | 2.261798 | 1.981784 | 1.994214 | 2.291242 |
| 17387720 | Olfr1098     | olfactory receptor 1098               | 3.32043  | 2.057211 | 2.763487 | 2.964852 | 2.236093 | 2.255442 |
| 17387723 | Olfr1099     | olfactory receptor 1099               | 2.406006 | 2.36079  | 2.481049 | 2.664787 | 3.187289 | 2.662959 |
| 17290990 | Olfr11       | olfactory receptor 11                 | 3.134836 | 3.134836 | 2.80255  | 3.134836 | 2.729828 | 3.539977 |
| 17337575 | Olfr110      | olfactory receptor 110                | 2.784059 | 2.506684 | 3.257375 | 2.775504 | 2.645188 | 2.922879 |
| 17387726 | Olfr1100     | olfactory receptor 1100               | 2.481049 | 2.239691 | 3.300558 | 2.481049 | 2.375696 | 2.633169 |
| 17387728 | Olfr1101     | olfactory receptor 1101               | 2.367017 | 2.615107 | 1.922229 | 2.255364 | 2.292974 | 2.18392  |
| 17372819 | Olfr1102     | olfactory receptor 1102               | 2.039619 | 2.207357 | 2.365524 | 2.745331 | 2.36746  | 2.013506 |
| 17387730 | Olfr1104     | olfactory receptor 1104               | 2.882039 | 2.582557 | 2.694019 | 2.396003 | 2.462989 | 2.243125 |
| 17387732 | Olfr1105     | olfactory receptor 1105               | 3.048564 | 3.822801 | 3.25381  | 3.465924 | 2.953448 | 2.647095 |
| 17387734 | Olfr1106     | olfactory receptor 1106               | 3.467486 | 2.746168 | 2.349543 | 2.89911  | 2.791596 | 3.220512 |
| 17387736 | Olfr1107     | olfactory receptor 1107               | 2.429535 | 1.968109 | 1.978957 | 2.092837 | 2.520518 | 2.082418 |
| 17387740 | Olfr1109     | olfactory receptor 1109               | 3.116377 | 2.854524 | 1.954379 | 2.29021  | 2.865248 | 3.084422 |
| 17337580 | Olfr111      | olfactory receptor 111                | 2.280768 | 1.85441  | 1.722794 | 2.005233 | 3.333551 | 2.404205 |
| 17387744 | Olfr1110     | olfactory receptor 1110               | 2.318449 | 2.256239 | 2.253973 | 2.075933 | 2.384935 | 2.377491 |
| 17387748 | Olfr1111     | olfactory receptor 1111               | 2.562674 | 2.30261  | 2.953202 | 3.000972 | 2.797272 | 2.721251 |
| 17372823 | Olfr1112     | olfactory receptor 1112               | 2.691219 | 2.595208 | 2.147964 | 2.595208 | 2.208076 | 3.153579 |

|          |              |                                                                           |          |          |          |          |          |          |
|----------|--------------|---------------------------------------------------------------------------|----------|----------|----------|----------|----------|----------|
| 17372825 | Olfr1113     | olfactory receptor 1113                                                   | 2.705396 | 1.923295 | 2.060936 | 2.374346 | 2.135109 | 2.057482 |
| 17372828 | Olfr1115     | olfactory receptor 1115                                                   | 2.938928 | 2.913958 | 2.887358 | 3.570213 | 3.161502 | 2.727955 |
| 17372831 | Olfr1116     | olfactory receptor 1116                                                   | 2.488661 | 2.112396 | 2.102725 | 2.371056 | 2.818954 | 2.905628 |
| 17372833 | Olfr1118     | olfactory receptor 1118                                                   | 1.997146 | 2.041161 | 2.255364 | 2.083357 | 2.188921 | 2.141958 |
| 17344881 | Olfr112      | olfactory receptor 112                                                    | 2.387648 | 2.420844 | 2.387648 | 2.107262 | 2.235767 | 2.31612  |
| 17372837 | Olfr1120     | olfactory receptor 1120                                                   | 2.273587 | 1.942238 | 1.838208 | 2.458145 | 2.111883 | 1.961245 |
| 17372840 | Olfr1121     | olfactory receptor 1121                                                   | 2.173741 | 2.303679 | 2.056584 | 2.083357 | 2.458673 | 2.072138 |
| 17372842 | Olfr1122     | olfactory receptor 1122                                                   | 3.792975 | 3.556677 | 4.186167 | 3.500789 | 3.202192 | 3.283035 |
| 17372846 | Olfr1123     | olfactory receptor 1123                                                   | 2.155123 | 2.7124   | 1.779843 | 1.932663 | 2.120655 | 2.381846 |
| 17372848 | Olfr1124     | olfactory receptor 1124                                                   | 2.869064 | 2.151615 | 2.307323 | 2.443214 | 3.386207 | 2.394011 |
| 17372850 | Olfr1126     | olfactory receptor 1126                                                   | 2.406006 | 2.552941 | 2.99505  | 2.508596 | 2.45173  | 2.497804 |
| 17387758 | Olfr1128     | olfactory receptor 1128                                                   | 2.222248 | 2.764005 | 3.021532 | 3.173929 | 2.922433 | 4.34468  |
| 17372866 | Olfr1129     | olfactory receptor 1129                                                   | 2.676801 | 2.164254 | 2.321054 | 2.620968 | 2.743429 | 2.177073 |
| 17344892 | Olfr113      | olfactory receptor 113                                                    | 3.894532 | 4.78434  | 5.28268  | 5.400451 | 4.78434  | 5.152955 |
| 17372870 | Olfr1130     | olfactory receptor 1130                                                   | 2.708567 | 2.437868 | 2.276236 | 2.074322 | 2.455693 | 2.057796 |
| 17372874 | Olfr1131     | olfactory receptor 1131                                                   | 5.317249 | 3.316221 | 2.460668 | 2.899934 | 2.876571 | 2.480584 |
| 17387760 | Olfr1132     | olfactory receptor 1132                                                   | 3.33302  | 1.748575 | 2.174329 | 3.660118 | 2.457293 | 2.328144 |
| 17387762 | Olfr1133     | olfactory receptor 1133                                                   | 2.760271 | 3.307795 | 2.135657 | 2.659804 | 2.550889 | 3.162422 |
| 17387764 | Olfr1134     | olfactory receptor 1134                                                   | 1.942857 | 2.445874 | 2.667355 | 2.2398   | 2.782767 | 2.134784 |
| 17387768 | Olfr1135     | olfactory receptor 1135                                                   | 2.457975 | 2.883998 | 2.632147 | 2.179973 | 1.927846 | 2.380822 |
| 17387770 | Olfr1136     | olfactory receptor 1136                                                   | 2.261406 | 1.787149 | 1.907351 | 2.209209 | 2.567617 | 1.938956 |
| 17387774 | Olfr1137     | olfactory receptor 1137                                                   | 2.527621 | 2.451237 | 2.451101 | 2.553861 | 2.287006 | 2.032619 |
| 17387776 | Olfr1138     | olfactory receptor 1138                                                   | 2.102375 | 2.329467 | 2.832488 | 2.395771 | 1.831188 | 2.290575 |
| 17344896 | Olfr114      | olfactory receptor 114                                                    | 2.616739 | 2.435858 | 2.427195 | 2.953407 | 2.848377 | 2.456782 |
| 17372876 | Olfr1140     | olfactory receptor 1140                                                   | 2.67402  | 2.606909 | 2.892486 | 2.573586 | 2.606909 | 2.256771 |
| 17387778 | Olfr1141     | olfactory receptor 1141                                                   | 4.007632 | 4.178543 | 2.728693 | 6.590464 | 3.689205 | 4.742014 |
| 17372882 | Olfr1143     | olfactory receptor 1143                                                   | 5.017991 | 5.398281 | 6.93401  | 4.881146 | 4.098511 | 4.330339 |
| 17372884 | Olfr1145     | olfactory receptor 1145                                                   | 2.376206 | 2.551136 | 2.67402  | 2.153152 | 2.458673 | 2.102215 |
| 17372886 | Olfr1148     | olfactory receptor 1148                                                   | 2.953407 | 2.953407 | 2.709206 | 3.251623 | 2.953407 | 2.811617 |
| 17344899 | Olfr115      | olfactory receptor 115                                                    | 2.36382  | 2.625769 | 1.968832 | 2.794597 | 2.686951 | 1.760494 |
| 17372888 | Olfr1151     | olfactory receptor 1151                                                   | 4.876547 | 3.282056 | 2.572284 | 2.143131 | 3.565736 | 3.338245 |
| 17372890 | Olfr1152     | olfactory receptor 1152                                                   | 4.162961 | 2.455097 | 2.237953 | 3.671577 | 3.717261 | 2.841869 |
| 17372892 | Olfr1153     | olfactory receptor 1153                                                   | 2.987399 | 2.235829 | 2.120449 | 2.991564 | 2.052753 | 2.481049 |
| 17387780 | Olfr1154     | olfactory receptor 1154                                                   | 2.110288 | 2.345247 | 2.667318 | 2.464321 | 2.042704 | 2.401091 |
| 17387782 | Olfr1155     | olfactory receptor 1155                                                   | 3.135053 | 2.332505 | 2.39818  | 2.404222 | 2.73263  | 2.606909 |
| 17387784 | Olfr1156     | olfactory receptor 1156                                                   | 2.367755 | 2.298209 | 2.078611 | 2.743809 | 2.472482 | 2.206653 |
| 17387788 | Olfr1157     | olfactory receptor 1157                                                   | 3.117739 | 2.76343  | 2.67402  | 2.657151 | 3.179412 | 3.140404 |
| 17372894 | Olfr1158     | olfactory receptor 1158                                                   | 4.535841 | 3.460331 | 4.20927  | 3.044404 | 2.826546 | 4.144132 |
| 17344905 | Olfr116      | olfactory receptor 116                                                    | 8.12276  | 4.579182 | 5.861744 | 5.783048 | 4.022744 | 5.707623 |
| 17387794 | Olfr1160     | olfactory receptor 1160                                                   | 2.008655 | 1.824094 | 1.982952 | 2.954246 | 2.034832 | 2.125644 |
| 17372896 | Olfr1161     | olfactory receptor 1161                                                   | 2.519103 | 2.146461 | 2.146461 | 2.605807 | 2.188921 | 2.481031 |
| 17387800 | Olfr1162     | olfactory receptor 1162                                                   | 2.503419 | 2.754003 | 3.256811 | 3.153863 | 3.130255 | 2.906675 |
| 17387802 | Olfr1163     | olfactory receptor 1163                                                   | 2.550836 | 2.524959 | 2.342729 | 2.449318 | 1.887622 | 2.606909 |
| 17387806 | Olfr1164     | olfactory receptor 1164                                                   | 2.162035 | 2.414225 | 2.204146 | 2.930892 | 2.701087 | 3.024067 |
| 17387810 | Olfr1166     | olfactory receptor 1166                                                   | 3.366361 | 3.827865 | 2.717086 | 4.3492   | 2.755664 | 3.366361 |
| 17387813 | Olfr1167     | olfactory receptor 1167                                                   | 3.369536 | 3.830041 | 3.380555 | 3.846003 | 4.378905 | 3.579406 |
| 17372898 | Olfr1168     | olfactory receptor 1168                                                   | 2.929958 | 2.535095 | 2.714638 | 3.488266 | 2.953734 | 3.569619 |
| 17344907 | Olfr117      | olfactory receptor 117                                                    | 2.150169 | 2.228511 | 2.198516 | 2.592547 | 2.355184 | 2.345442 |
| 17387817 | Olfr1170     | olfactory receptor 1170                                                   | 2.3715   | 2.309611 | 2.218355 | 2.759544 | 2.273792 | 1.951374 |
| 17387822 | Olfr1173     | olfactory receptor 1173                                                   | 2.288036 | 2.129877 | 2.165019 | 2.165019 | 3.096332 | 2.075156 |
| 17387824 | Olfr1174-ps  | olfactory receptor 1174, pseudogene                                       | 6.84125  | 7.296477 | 8.560411 | 8.51685  | 5.88499  | 8.968272 |
| 17387826 | Olfr1175-ps  | olfactory receptor 1175, pseudogene                                       | 3.493057 | 3.010827 | 3.016112 | 2.584544 | 3.23288  | 2.639327 |
| 17372900 | Olfr1176     | olfactory receptor 1176                                                   | 2.67402  | 2.274611 | 2.675187 | 2.656598 | 2.916342 | 2.287957 |
| 17372902 | Olfr1178     | olfactory receptor 1178                                                   | 4.535589 | 3.045185 | 2.818114 | 2.80634  | 3.833441 | 2.931522 |
| 17387829 | Olfr1179     | olfactory receptor 1179                                                   | 3.67843  | 3.024423 | 2.889721 | 2.889721 | 3.504673 | 2.803171 |
| 17337583 | Olfr118      | olfactory receptor 118                                                    | 3.365755 | 2.477148 | 2.56824  | 2.418781 | 2.559177 | 2.238046 |
| 17387831 | Olfr1180     | olfactory receptor 1180                                                   | 2.263178 | 2.713096 | 2.492321 | 2.163159 | 2.363852 | 1.822072 |
| 17387835 | Olfr1181     | olfactory receptor 1181                                                   | 1.866946 | 2.413907 | 2.67402  | 2.047027 | 2.67402  | 3.19953  |
| 17387837 | Olfr1182     | olfactory receptor 1182                                                   | 2.548362 | 2.354744 | 1.868551 | 2.165049 | 2.566798 | 2.285991 |
| 17372904 | Olfr1183     | olfactory receptor 1183                                                   | 2.794965 | 3.173357 | 3.88208  | 3.224667 | 3.171906 | 3.318658 |
| 17372906 | Olfr1184     | olfactory receptor 1184                                                   | 1.940368 | 2.659804 | 2.92596  | 2.199644 | 2.836339 | 2.659804 |
| 17372908 | Olfr1186     | olfactory receptor 1186                                                   | 1.979245 | 1.791142 | 1.928702 | 1.736317 | 2.147949 | 2.146283 |
| 17387841 | Olfr1187-ps1 | olfactory receptor 1187, pseudogene 1 [Source:MGI Symbol;Acc:MGI:3031021] | 2.646123 | 2.263727 | 2.388442 | 2.381251 | 1.973081 | 2.684717 |
| 17372912 | Olfr1188     | olfactory receptor 1188                                                   | 2.069353 | 2.25541  | 2.898025 | 2.48873  | 2.665655 | 2.265501 |
| 17372914 | Olfr1189     | olfactory receptor 1189                                                   | 3.893479 | 3.21253  | 2.645169 | 2.538718 | 3.610729 | 2.252707 |
| 17337585 | Olfr119      | olfactory receptor 119                                                    | 1.932074 | 2.239691 | 2.020147 | 2.396917 | 1.979368 | 2.38401  |
| 17372916 | Olfr1192-ps1 | olfactory receptor 1192, pseudogene 1                                     | 2.258821 | 2.597187 | 3.137358 | 2.355837 | 2.07277  | 2.958672 |
| 17372919 | Olfr1193     | olfactory receptor 1193                                                   | 5.338965 | 4.801649 | 4.881417 | 5.536253 | 6.103641 | 5.693595 |
| 17387844 | Olfr1195     | olfactory receptor 1195                                                   | 2.440472 | 2.440472 | 3.171159 | 2.621023 | 1.642405 | 2.606909 |
| 17387846 | Olfr1196     | olfactory receptor 1196                                                   | 2.770699 | 3.86155  | 3.094615 | 8.936439 | 4.624188 | 4.562422 |
| 17387848 | Olfr1197     | olfactory receptor 1197                                                   | 4.117161 | 2.758053 | 3.247884 | 2.72512  | 3.067408 | 3.211372 |
| 17387850 | Olfr1198     | olfactory receptor 1198                                                   | 2.16205  | 2.661464 | 1.980425 | 2.304206 | 1.735739 | 2.334057 |
| 17387852 | Olfr1199     | olfactory receptor 1199                                                   | 3.357599 | 3.335655 | 2.981565 | 3.016405 | 3.234539 | 2.669482 |
| 17215817 | Olfr12       | olfactory receptor 12                                                     | 6.171709 | 6.086488 | 7.827763 | 6.171709 | 5.188329 | 6.171709 |
| 17337589 | Olfr120      | olfactory receptor 120                                                    | 4.7058   | 2.906111 | 2.611919 | 3.141296 | 2.743752 | 2.901904 |
| 17387856 | Olfr1200     | olfactory receptor 1200                                                   | 2.367772 | 2.349412 | 2.716991 | 2.318803 | 2.812884 | 2.496263 |
| 17372921 | Olfr1201     | olfactory receptor 1201                                                   | 2.685238 | 2.138901 | 1.950332 | 2.196993 | 2.661298 | 2.519295 |
| 17372923 | Olfr1202     | olfactory receptor 1202                                                   | 2.264904 | 1.787769 | 1.916402 | 1.68817  | 1.955422 | 1.904246 |
| 17372927 | Olfr1204     | olfactory receptor 1204                                                   | 2.311982 | 2.59314  | 2.080038 | 2.55356  | 3.224197 | 2.40936  |
| 17372925 | Olfr1205     | olfactory receptor 1205                                                   | 2.944025 | 3.03926  | 3.77891  | 2.825155 | 3.142276 | 4.655061 |
| 17372929 | Olfr1206     | olfactory receptor 1206                                                   | 2.805368 | 2.94015  | 2.270421 | 2.378695 | 2.477217 | 2.839427 |
| 17387858 | Olfr1208     | olfactory receptor 1208                                                   | 2.572748 | 2.543368 | 2.53125  | 3.03808  | 2.28615  | 2.398014 |
| 17387862 | Olfr1209     | olfactory receptor 1209                                                   | 3.294159 | 2.38396  | 2.03183  | 2.616757 | 2.089214 | 1.800565 |
| 17337591 | Olfr121      | olfactory receptor 121                                                    | 2.264339 | 2.23724  | 1.932703 | 2.181182 | 2.877688 | 1.915804 |

|          |              |                                       |          |          |          |          |          |          |
|----------|--------------|---------------------------------------|----------|----------|----------|----------|----------|----------|
| 17387864 | Olfr1211     | olfactory receptor 1211               | 1.980068 | 2.724988 | 2.725234 | 2.348338 | 4.792904 | 3.729055 |
| 17372931 | Olfr1212     | olfactory receptor 1212               | 2.277794 | 2.869163 | 2.371665 | 2.083357 | 2.37058  | 2.181076 |
| 17387870 | Olfr1213     | olfactory receptor 1213               | 1.959778 | 2.084917 | 2.185359 | 1.927499 | 2.451339 | 2.072138 |
| 17387876 | Olfr1214     | olfactory receptor 1214               | 2.870436 | 2.775524 | 2.514288 | 2.497007 | 2.935955 | 2.982909 |
| 17387878 | Olfr1215     | olfactory receptor 1215               | 3.062691 | 3.230035 | 3.062691 | 3.421242 | 3.10495  | 3.062691 |
| 17387880 | Olfr1216     | olfactory receptor 1216               | 2.137849 | 2.060051 | 2.282034 | 2.060051 | 1.990388 | 2.402389 |
| 17387882 | Olfr1217     | olfactory receptor 1217               | 2.10411  | 2.425765 | 2.045367 | 1.846675 | 2.259808 | 1.851854 |
| 17387886 | Olfr1218     | olfactory receptor 1218               | 2.772428 | 2.67402  | 2.772428 | 2.214667 | 4.236403 | 3.135032 |
| 17387888 | Olfr1219     | olfactory receptor 1219               | 8.89787  | 7.487634 | 6.141708 | 10.92181 | 18.21191 | 8.89787  |
| 17337595 | Olfr122      | olfactory receptor 122                | 2.872287 | 2.434946 | 4.004688 | 2.957504 | 2.528514 | 3.554853 |
| 17387890 | Olfr1220     | olfactory receptor 1220               | 5.336338 | 6.094256 | 5.894911 | 4.512791 | 3.806566 | 4.20927  |
| 17387894 | Olfr1221     | olfactory receptor 1221               | 2.551614 | 2.239691 | 2.092953 | 2.304206 | 2.239691 | 2.681481 |
| 17387900 | Olfr1222     | olfactory receptor 1222               | 3.116961 | 2.843386 | 2.593014 | 2.997438 | 3.063498 | 3.496739 |
| 17387902 | Olfr1223     | olfactory receptor 1223               | 2.475809 | 2.785546 | 2.501858 | 2.121317 | 2.662866 | 3.190782 |
| 17387906 | Olfr1224-ps1 | olfactory receptor 1224, pseudogene 1 | 6.979676 | 3.868784 | 3.966042 | 3.887035 | 5.120306 | 5.314743 |
| 17387908 | Olfr1225     | olfactory receptor 1225               | 2.308651 | 1.82038  | 2.469194 | 2.135864 | 2.782767 | 2.656469 |
| 17387912 | Olfr1226     | olfactory receptor 1226               | 10.60814 | 17.44752 | 10.96049 | 10.82466 | 6.423858 | 15.43764 |
| 17387914 | Olfr1228     | olfactory receptor 1228               | 2.579462 | 1.710253 | 2.28512  | 2.469947 | 2.072885 | 2.188724 |
| 17387918 | Olfr1229     | olfactory receptor 1229               | 2.371287 | 2.342908 | 2.311838 | 2.81501  | 2.708511 | 2.387582 |
| 17337599 | Olfr123      | olfactory receptor 123                | 3.525701 | 3.097448 | 4.050107 | 3.668067 | 3.467894 | 4.024836 |
| 17387926 | Olfr1230     | olfactory receptor 1230               | 2.215681 | 2.774408 | 2.467791 | 2.757422 | 2.945597 | 3.210082 |
| 17387928 | Olfr1231     | olfactory receptor 1231               | 2.680347 | 2.365492 | 2.659325 | 2.246984 | 2.350227 | 2.930283 |
| 17387930 | Olfr1232     | olfactory receptor 1232               | 3.070641 | 2.508196 | 2.637169 | 2.723931 | 2.733766 | 2.637169 |
| 17387932 | Olfr1233     | olfactory receptor 1233               | 3.395396 | 2.67695  | 2.67695  | 2.606909 | 2.749673 | 2.180668 |
| 17387936 | Olfr1234     | olfactory receptor 1234               | 2.257741 | 2.215389 | 2.597709 | 2.352427 | 2.256427 | 2.584956 |
| 17387940 | Olfr1238     | olfactory receptor 1238               | 2.775158 | 3.451707 | 4.379603 | 2.676746 | 2.549704 | 2.781687 |
| 17387942 | Olfr1239     | olfactory receptor 1239               | 2.162035 | 2.953407 | 2.082837 | 2.801035 | 2.295264 | 2.953407 |
| 17337604 | Olfr124      | olfactory receptor 124                | 2.999745 | 2.420844 | 2.317662 | 2.389403 | 2.645444 | 2.229546 |
| 17387944 | Olfr1240     | olfactory receptor 1240               | 2.072842 | 2.220785 | 1.897711 | 2.261876 | 1.94209  | 2.024815 |
| 17387948 | Olfr1241     | olfactory receptor 1241               | 2.585691 | 2.41739  | 2.226241 | 2.934735 | 2.639162 | 2.639162 |
| 17387950 | Olfr1242     | olfactory receptor 1242               | 2.783114 | 2.733046 | 3.248064 | 3.032652 | 3.433024 | 2.783268 |
| 17387956 | Olfr1243     | olfactory receptor 1243               | 2.096452 | 2.447129 | 2.110127 | 2.155003 | 2.886237 | 2.502847 |
| 17387961 | Olfr1245     | olfactory receptor 1245               | 2.564718 | 2.239241 | 1.863235 | 2.36682  | 2.220785 | 2.162305 |
| 17387965 | Olfr1246     | olfactory receptor 1246               | 3.49296  | 2.409527 | 2.370432 | 2.616104 | 3.155853 | 2.452087 |
| 17387969 | Olfr1247     | olfactory receptor 1247               | 2.280768 | 2.308571 | 2.441842 | 2.328838 | 2.356719 | 2.489628 |
| 17387975 | Olfr1248     | olfactory receptor 1248               | 2.271917 | 2.271917 | 2.72822  | 2.189225 | 2.763296 | 2.005372 |
| 17387979 | Olfr1249     | olfactory receptor 1249               | 3.365965 | 2.480309 | 2.452155 | 3.648921 | 2.953407 | 2.953407 |
| 17337608 | Olfr125      | olfactory receptor 125                | 2.195075 | 2.133793 | 1.98985  | 2.283663 | 2.275337 | 2.032309 |
| 17387981 | Olfr1250     | olfactory receptor 1250               | 2.07507  | 2.143086 | 2.192231 | 2.36682  | 2.108709 | 2.249696 |
| 17387987 | Olfr1251     | olfactory receptor 1251               | 3.225717 | 2.289797 | 2.601259 | 2.433512 | 2.28829  | 2.567208 |
| 17387991 | Olfr1252     | olfactory receptor 1252               | 2.637151 | 2.767225 | 2.670297 | 2.586121 | 2.640406 | 2.96251  |
| 17387995 | Olfr1253     | olfactory receptor 1253               | 1.881796 | 1.898013 | 2.045509 | 1.898013 | 2.056142 | 2.953407 |
| 17387997 | Olfr1254     | olfactory receptor 1254               | 2.420508 | 2.306332 | 2.022893 | 2.306332 | 2.450608 | 3.10452  |
| 17372934 | Olfr1255     | olfactory receptor 1255               | 2.162035 | 1.768223 | 1.768223 | 2.111883 | 2.049668 | 1.700985 |
| 17388001 | Olfr1256     | olfactory receptor 1256               | 2.860783 | 1.940825 | 2.285991 | 2.335498 | 2.34811  | 2.285991 |
| 17372936 | Olfr1257     | olfactory receptor 1257               | 1.969241 | 1.906055 | 1.79852  | 2.2959   | 2.805893 | 2.297413 |
| 17372942 | Olfr1258     | olfactory receptor 1258               | 2.379156 | 2.298512 | 2.528006 | 2.535324 | 3.095023 | 2.241058 |
| 17388008 | Olfr1259     | olfactory receptor 1259               | 2.780164 | 2.55627  | 2.818524 | 2.611629 | 2.311293 | 2.954717 |
| 17337612 | Olfr126      | olfactory receptor 126                | 2.398363 | 1.995693 | 2.365524 | 2.167752 | 2.671    | 2.140711 |
| 17372949 | Olfr1260     | olfactory receptor 1260               | 3.374023 | 3.225494 | 2.796825 | 2.498877 | 3.065006 | 2.826154 |
[truncated: 2,466,478 more chars]
